# Supplementary material for: Epigenome-wide effects of vitamin D and their impact on the transcriptome of human monocytes involve CTCF
Source: Oxford University Press journal article supplement (doi:10.1093/nar/gkv1519), 2015-12-28

## SUPPLEMENTARY MATERIAL

### SUPPLEMENTARY TABLES

**Table S1: 1,25(OH)<sub>2</sub>D<sub>3</sub>-modulated FAIRE-peaks.** At 8,979 genomic regions a treatment of THP-1 cells with 1,25(OH)<sub>2</sub>D<sub>3</sub> significantly ( $p < 0.05$ ) modulated chromatin accessibility at least at one time point. Absolute values of chromatin accessibility as measured in triplicate FAIRE-seq experiments and FC in reference to time point 0 h are indicated. Genomic regions that are modulated in average more than 2-fold (see **Fig. 1C**) are shaded in beige, regions with six or more FAIRE peaks in blue and the overlap of both categories in pink. Of note, the chromosomal region chr1:39,956,000-44,264,000 is amplified in THP-1 cells and shaded in grey. SOM categorization of FAIRE time course profiles by absolute values (groups I to IX, see **Fig. S3B**) and FC (groups A to I, see **Fig. 2D**) is marked. Furthermore, the overlap of the summits ( $\pm 100$  bp) of the FAIRE peaks with VDR and CTCF motifs (both at HOMER score 7) is indicated as well as the overlap (maximal distance 250 bp) with TSS regions and VDR (11,29) and CTCF ChIP-seq peaks found in THP-1 cells (see **Fig. 3A**).

**Table S2: CTCF peaks.** THP-1 cells were treated for 24 h with 1,25(OH)<sub>2</sub>D<sub>3</sub> (1,25D) or solvent (EtOH) and chromatin was extracted for CTCF ChIP-seq analysis. The position of 71,993 peaks is indicated as well as their strength (fold enrichment) in the presence and absence of ligand and the resulting FC. In addition, the overlap of the CTCF loci with TSS regions, DR3-type sequences (HOMER score 7), VDR (found in absence or presence of 1,25(OH)<sub>2</sub>D<sub>3</sub> (11)) and ligand-dependent FAIRE sites is shown.

**Table S3: 1,25(OH)<sub>2</sub>D<sub>3</sub> target genes.** In triplicate independent experiments THP-1 cells were stimulated for 2.5, 4 and 24 h with vehicle (EtOH) or 100 nM 1,25(OH)<sub>2</sub>D<sub>3</sub> (1,25D). From the 9,220 not expressed genes (grey, average expression  $< 0.3$ ) at basal level (EtOH), 38 were expressed above the threshold after 1,25(OH)<sub>2</sub>D<sub>3</sub> treatment. Including the latter, 46 genes

(marked in red) were significantly ( $p < 0.001$ ) regulated by  $1,25(\text{OH})_2\text{D}_3$  after 2.5 h, 289 (green) after 4 h and 1,204 (blue) after 24 h.

**Table S4: Canonical pathways, biofunctions and diseases associated with  $1,25(\text{OH})_2\text{D}_3$  target genes.** Canonical pathways, biofunctions and diseases were analyzed through the use of IPA (Qiagen, [www.qiagen.com/ingenuity](http://www.qiagen.com/ingenuity)), in order to rank concerning the involvement of  $1,25(\text{OH})_2\text{D}_3$  target genes at 2.5, 4 and 24 h after onset of stimulation (see **Table S3**) by significance of enrichment.

**Table S5:  $1,25(\text{OH})_2\text{D}_3$  target genes predicted by epigenome data.** Loci of 165 accessible chromatin regions overlapping with a TSS of a gene significantly modulated by  $1,25(\text{OH})_2\text{D}_3$  at 24 h are listed. The classification of the genes (see **Fig. S6A**) is indicated.

**Table S6: Dicer substrate siRNA oligonucleotides (IDT, Leuven, Belgium).**

| Gene        | IDT catalog no.       | Oligo nucleotide sequences (5'-3')                          |
|-------------|-----------------------|-------------------------------------------------------------|
| <i>CTCF</i> | HSC.RNAI.N006565.12.1 | GCAUUUGAACCUUGUAUAAUUA ACT<br>AGUUA AUUAUACAAGGUUCAA AUGCUG |
| <i>CTCF</i> | HSC.RNAI.N006565.12.2 | GGAGCCUGCCGUAGAAAUUGAACCT<br>AGGUUCAAUUCUACGGCAGGCUCCUC     |
| <i>CTCF</i> | HSC.RNAI.N006565.12.3 | AGCAAU CAUGGAAUGUUCUGAGTC<br>GACUCAGAACAUUCCAUGAUUUGCUAA    |
| <i>NCI</i>  | DS NC1                | CGUUA AUUCGCGUAUAAUACGCGUAT<br>AUACGCGUAUUAUACGCGAUUAACGAC  |

**Table S7: Reverse transcription qPCR primers.**

| Gene                         | Fragment size (bp) | Annealing temperature (°C) | Primer sequences (5'-3')                           |
|------------------------------|--------------------|----------------------------|----------------------------------------------------|
| <i>ALOX5</i> <sup>2</sup>    | 246                | 60                         | TGGCGCGGTGGATTTCATAC<br>CAGGGGAACCTCGATGTAGTCC     |
| <i>ASAP2</i> <sup>2</sup>    | 210                | 60                         | AATAAGCGGAGCGGAAATTGC<br>GTTTCAATGGAAGGTTTGAGGC    |
| <i>B2M</i> <sup>1,2</sup>    | 246                | 60                         | GGCTATCCAGCGTACTCCAAA<br>CGGCAGGCATACTCATCTTTTT    |
| <i>CAMP</i> <sup>2</sup>     | 135                | 60                         | CAGCAGTCACCAGAGGATTGT<br>CAGCAGGGCAAATCTCTTGTTA    |
| <i>CD14</i>                  | 142                | 60                         | ACGCCAGAACCTTGTGAGC<br>GCATGGATCTCCACCTCTACTG      |
| <i>CTCF</i> <sup>2</sup>     | 77                 | 60                         | ATGTGCGATTACGCCAGTGTA<br>TGAAACGGACGCTCTCCAGTA     |
| <i>CYP24A1</i>               | 70                 | 60                         | CAAACCGTGGAAGGCCTATC<br>AGTCTTCCCCTTCCAGGATCA      |
| <i>ELL</i> <sup>2</sup>      | 226                | 60                         | GCAGCATACAGGACAAGATCAC<br>GCACTCGCCAAGTTGATGG      |
| <i>FANCE</i> <sup>2</sup>    | 186                | 60                         | AAGCCTCTTTCTTGACGGAT<br>TCCATCTTCACAAGGCAACAC      |
| <i>FBP1</i> <sup>2</sup>     | 102                | 60                         | AAACACGCCATCATAGTGGAAC<br>TCCAACGGACACAAGGCAATC    |
| <i>GAPDH</i> <sup>1,2</sup>  | 113                | 60                         | CATGAGAAGTATGACAACAGCCTAG<br>TCCTTCCACGATACCAAAGT  |
| <i>G0S2</i> <sup>5</sup>     | 102                | 64                         | GCCACTAAGGTCATTCCCGCCT<br>CCTTGCGCTTCTGGGCCATCAT   |
| <i>HBEGF</i> <sup>2</sup>    | 175                | 60                         | CAAGGAGGAGCACGGGAAAAG<br>CCCATGACACCTCTCTCCA       |
| <i>HPRT1</i> <sup>1,3</sup>  | 94                 | 60                         | TGACACTGGCAAAACAATGCA<br>GGTCCTTTTCACCAGCAAGCT     |
| <i>HTT</i> <sup>2</sup>      | 175                | 64                         | AGCTACCGCTGCTAAGGA<br>ACATCCGATCTCGATTGAGGTC       |
| <i>IL8</i>                   | 168                | 60                         | CAGAGACAGCAGAGCACAC<br>AGCACTCCTTGGCAAACTG         |
| <i>MPC1</i> <sup>2</sup>     | 47                 | 60                         | AGTCTCCAGAGATTATCAGTGGG<br>GCAACAGAGGGCAAATGTCAT   |
| <i>MYC</i>                   | 147                | 60                         | CCAGCAGCGACTCTGAGG<br>GGACCAGTGGGCTGTGAG           |
| <i>NFKB1A</i>                | 227                | 60                         | GCAAAATCCTGACCTGGTGT<br>GCTCGTCCTCTGTGAACTCC       |
| <i>NOD2</i> <sup>4</sup>     | 83                 | 60                         | TCTCTCGCAGAAGGACTGAA<br>TCTGCCCTAGGTAGGTGAT        |
| <i>PPARGC1B</i> <sup>6</sup> | 113                | 64                         | TGAGCAGACCTTGACAGTGGAG<br>GACTATGCTTGATGTCTGGTTTGA |
| <i>THBD</i> <sup>2</sup>     | 107                | 60                         | GACCTTCCTCAATGCCAGTCA<br>CGTCGCCGTTTCAGTAGCAA      |

|                                   |     |    |                                                  |
|-----------------------------------|-----|----|--------------------------------------------------|
| <b><i>TMEM37</i></b> <sup>6</sup> | 147 | 64 | TGGAGTTCCTCATGGTGTCCCA<br>GTGTGACTTGGTTCCTGAGGAG |
| <b><i>ZFP36</i></b> <sup>4</sup>  | 104 | 60 | CTCATGGCCAACCGTTACAC<br>GACTCAGTCCCTCCATGGTC     |

<sup>1</sup> reference gene

<sup>2</sup> sequences obtained from PrimerBank (<http://pga.mgh.harvard.edu/primerbank>)

<sup>3</sup> see Vandesompele, *Genome Biol* **3**, R34 (2002)

<sup>4</sup> designed with Primer3Plus (<http://www.bioinformatics.nl/cgi-bin/primer3plus/primer3plus.cgi>)

<sup>5</sup> designed with Primer-BLAST (<http://www.ncbi.nlm.nih.gov/tools/primer-blast>)

<sup>6</sup> OriGene

### SUPPLEMENTARY FIGURE LEGENDS

**Figure S1: FAIRE-seq analysis of a 1,25(OH)<sub>2</sub>D<sub>3</sub> time course in THP-1 cells.** In triplicate independent experiments THP-1 cells were stimulated with 100 nM 1,25(OH)<sub>2</sub>D<sub>3</sub> (1,25D) for 0, 2, 24 and 48 h and chromatin was isolated for FAIRE-seq analysis. A pie chart indicates the number and percentage of FAIRE peaks that showed at no, at one, at two and at three time points a significant ( $p < 0.001$ ) ligand effect (**A**). Of note, the total number of genomic regions showing a significant ( $FDR < 0.1\%$ ) FAIRE signal at least at one of the four time points was 80,586 but only at 62,231 regions the FAIRE signal was significant ( $FDR < 0.1\%$ ) at all time points. A stacked bar chart illustrates the absolute number of FAIRE peaks being modulated by 1,25(OH)<sub>2</sub>D<sub>3</sub> treatment at 2, 24 and 48 h and the respective percentages of genomic regions displaying chromatin opening (**B**). The IGV browser was used to visualize representative examples of genomic loci ( $\pm 2$  kb of the peak summit) with 1,25(OH)<sub>2</sub>D<sub>3</sub>-induced chromatin opening that in parallel overlap with a TSS region (**C**) or display 1,25(OH)<sub>2</sub>D<sub>3</sub>-induced chromatin closing (**D**). The peak tracks display data from the triplicate FAIRE-seq time course experiment (grey for input lanes and turquoise for 1,25(OH)<sub>2</sub>D<sub>3</sub> treatments for the indicated time periods) and a VDR ChIP-seq experiment (red, (29)). The presence of a DR3-type sequence below the summits ( $\pm 100$  bp) of the FAIRE peaks is indicated. Gene structures are shown in blue.

**Figure S2: 1,25(OH)<sub>2</sub>D<sub>3</sub>-modulated FAIRE peaks.** Histogram plots are shown that use 20 evenly sized bins, in order to display the distribution (FC, in log scale) of the 3,323 genomic regions after 2 h stimulation of THP-1 cells with 1,25(OH)<sub>2</sub>D<sub>3</sub>, the 4,586 regions after 24 h and the 2,399 regions after 48 h. Red vertical lines indicate the respective average changes in chromatin accessibility due to ligand treatment.

**Figure S3: Overlap of ligand-modulated FAIRE peaks with TSS regions.** Stacked column graphs indicate the overlap of all 62,231 regions of open chromatin with TSS regions (**A**),

which is in all cases approximately 20%. The remaining 80% non-TSS regions may be enhancers and silencers. For all 8,979 significantly 1,25(OH)<sub>2</sub>D<sub>3</sub>-responsive genomic regions the time course of the absolute change of their chromatin accessibility was analyzed in a 3x3 SOM lattice (**B**). Each of the nine resulting groups (I to IX, marked in **Table S1**) is represented by a graph displaying the average chromatin accessibility over time. Three groups (III, VI and VII) overlap with 2.5-times more TSS regions than the reference (see **A**) or 2.5-times less (groups V and VIII).

**Figure S4: Motifs below FAIRE peak summits.** The genomic sequence below the summits (+/-100 bp) of the 8,979 ligand-responsive FAIRE peaks was screened by HOMER (score 7) for enriched transcription factor binding sites (**A**). The sequence logos of the 10 most significantly enriched motifs are listed. Public ENCODE ChIP-seq data from K562 cells were re-analyzed at harmonized settings. Venn diagrams were used to display the overlap of the 98,515 CTCF peaks in K562 cells (blue) with all 71,993 CTCF sites found in THP-1 cells (red) (left), the 46,920 CTCF sites in presence of solvent (EtOH) (center) and the 21,690 common CTCF sites (right, **B**). Due to variant peak width the percentages of overlap differ between K562 and THP-1 cells. The overlap of K562 CTCF peaks with binding sites for the transcription factors ETS1, GABPA, NR2F2 and NR4A1 in the same cell lines is shown (**C**). Both absolute numbers as well as percentages are indicated.

**Figure S5: Impact of CTCF silencing.** THP-1 cells were transfected with a mixture of three DsiRNA oligonucleotides directed against CTCF and after 24 h they were stimulated with solvent (EtOH) or 100 nM 1,25(OH)<sub>2</sub>D<sub>3</sub> for 24 h. qPCR was performed in order to determine changes in the expression of sixteen 1,25(OH)<sub>2</sub>D<sub>3</sub> target genes. Columns show the average of three independent experiments, each performed in triplicate individual transfections, and bars indicate standard deviations. Two-tailed Student's t-tests were performed to determine the significance of i) the mRNA changes by the CTCF knock-down (black) in reference to control DsiRNA-transfected cells, ii) the modulation of the ligand effect (blue) in reference to

control DsiRNA-transfected cells and iii) the induction by 1,25(OH)<sub>2</sub>D<sub>3</sub> (red) in reference to solvent-treated cells (\*  $p < 0.05$ ; \*\*  $p < 0.01$ ; \*\*\*  $p < 0.001$ ).

**Figure S6: Details of RNA-seq analysis.** In triplicate independent experiments THP-1 cells were treated for 2.5, 4 and 24 h with vehicle (EtOH) or 100 nM 1,25(OH)<sub>2</sub>D<sub>3</sub> and RNA-seq analysis was performed. A pie chart illustrates the number of genes that were i) not expressed in THP-1 cells at basal level, ii) expressed but not regulated by 1,25(OH)<sub>2</sub>D<sub>3</sub> and iii) expressed and regulated by 1,25(OH)<sub>2</sub>D<sub>3</sub> at one or more time points (**A**, see **Table S2**). Venn diagrams demonstrate the overlap of genes being significantly ( $p < 0.001$ ) up-regulated (**B**) or down-regulated (**C**) by 1,25(OH)<sub>2</sub>D<sub>3</sub> at the respective time points.

**Figure S7: Integration of epigenomic and transcriptomic data.** K-means analysis ( $k = 6$ ) of the FC (in log scale) of gene expression after 24 h stimulation with 1,25(OH)<sub>2</sub>D<sub>3</sub> for 165 genes overlapping with at least one of the ligand-modulated 7,979 FAIRE peaks (**A**). Relevance (obtained by random forests) of the top 11 attributes for inferring the discrete state of the FC (in log scale) at 24 h for the corresponding (overlapping or closest) gene for all 8,979 FAIRE peaks (**B**) or the selected 165 1,25(OH)<sub>2</sub>D<sub>3</sub> target genes (**C**) is indicated. Average prediction (test) error of the discrete state of the FC (in log scale) at 24 h for the corresponding genes for i) all 8,979 FAIRE peaks (**D**), ii) the selected 165 1,25(OH)<sub>2</sub>D<sub>3</sub> target genes for epigenomic and transcriptomic attributes or iii) as a function of the number of attributes (**F**) is shown.

Fig. S1

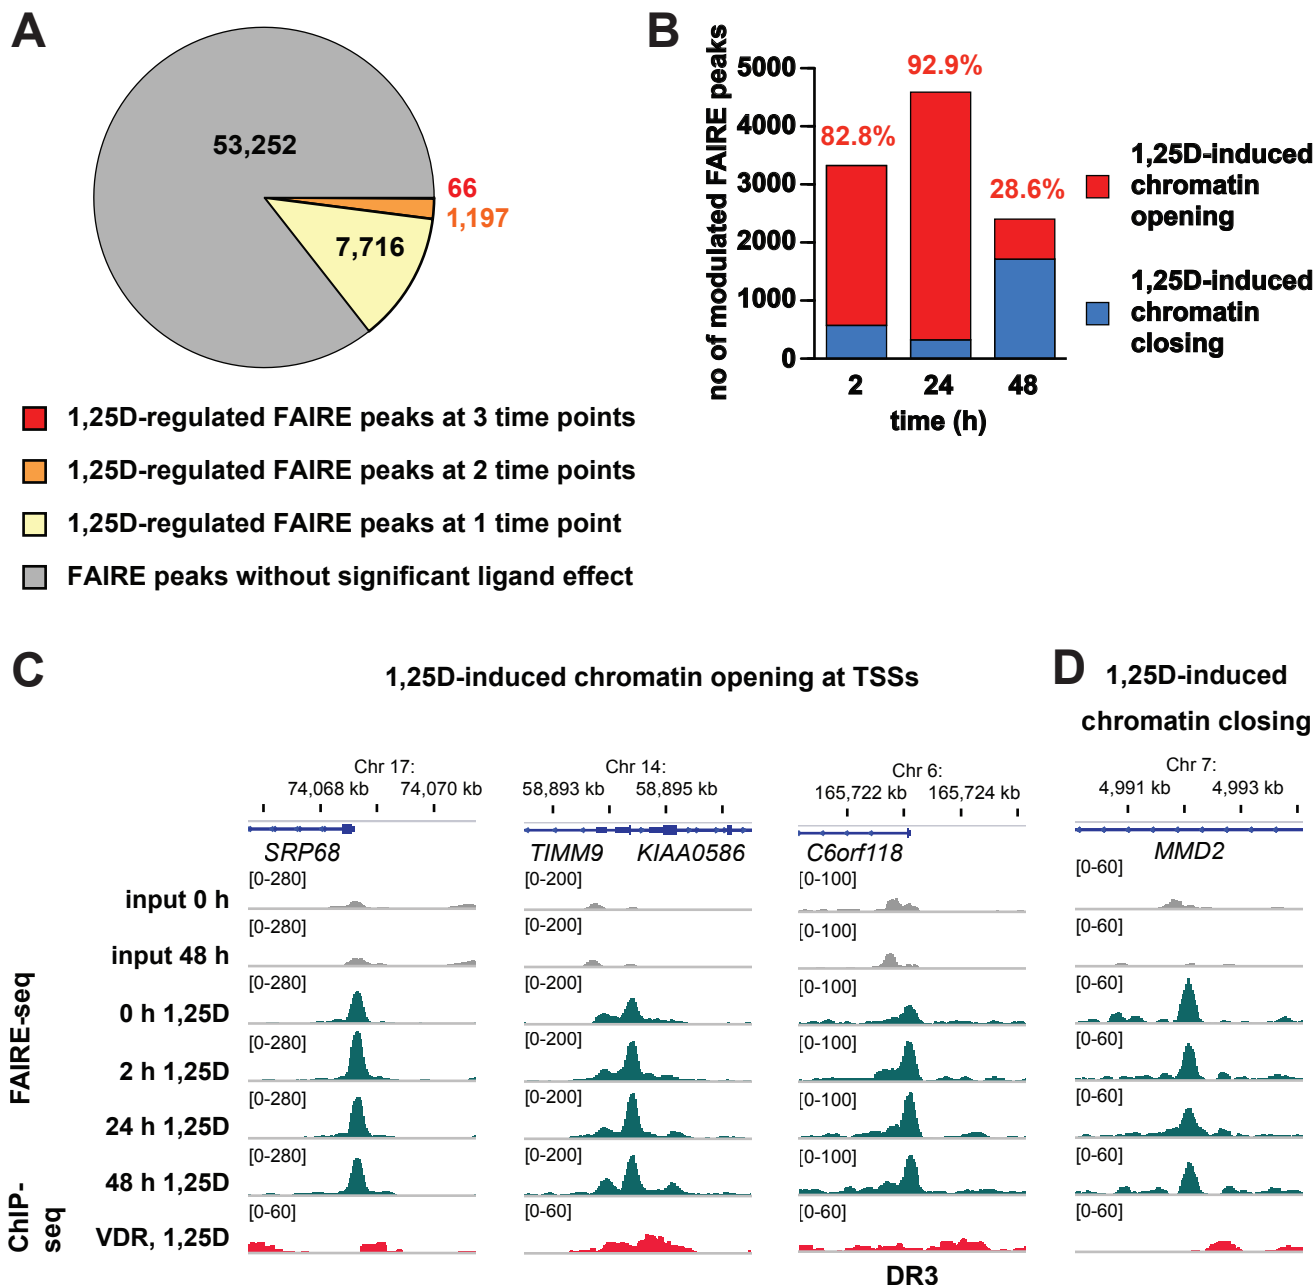



Fig. S2

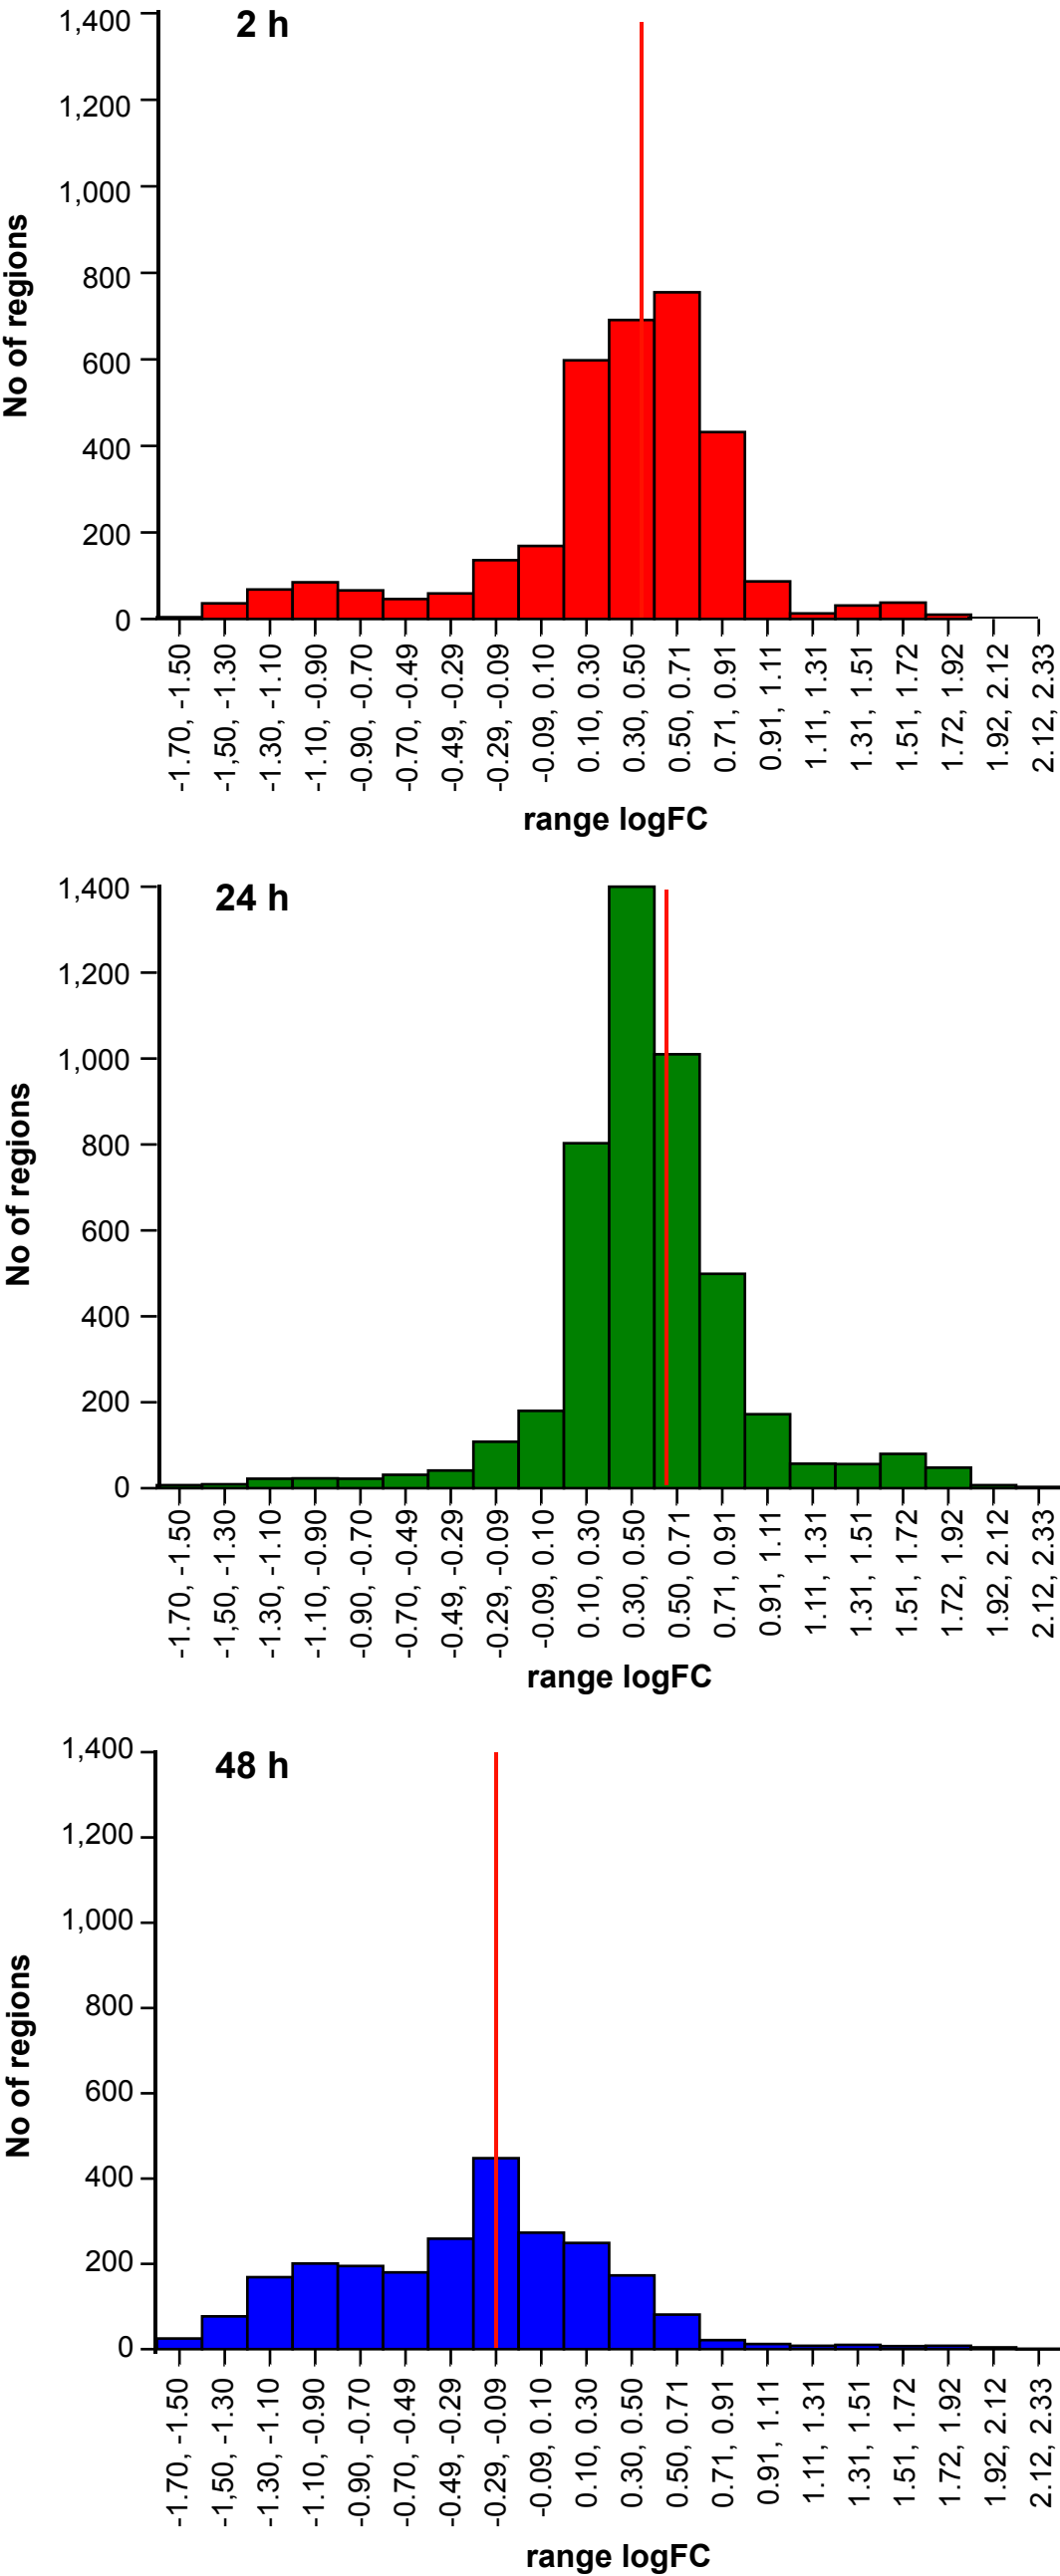

Fig. S3

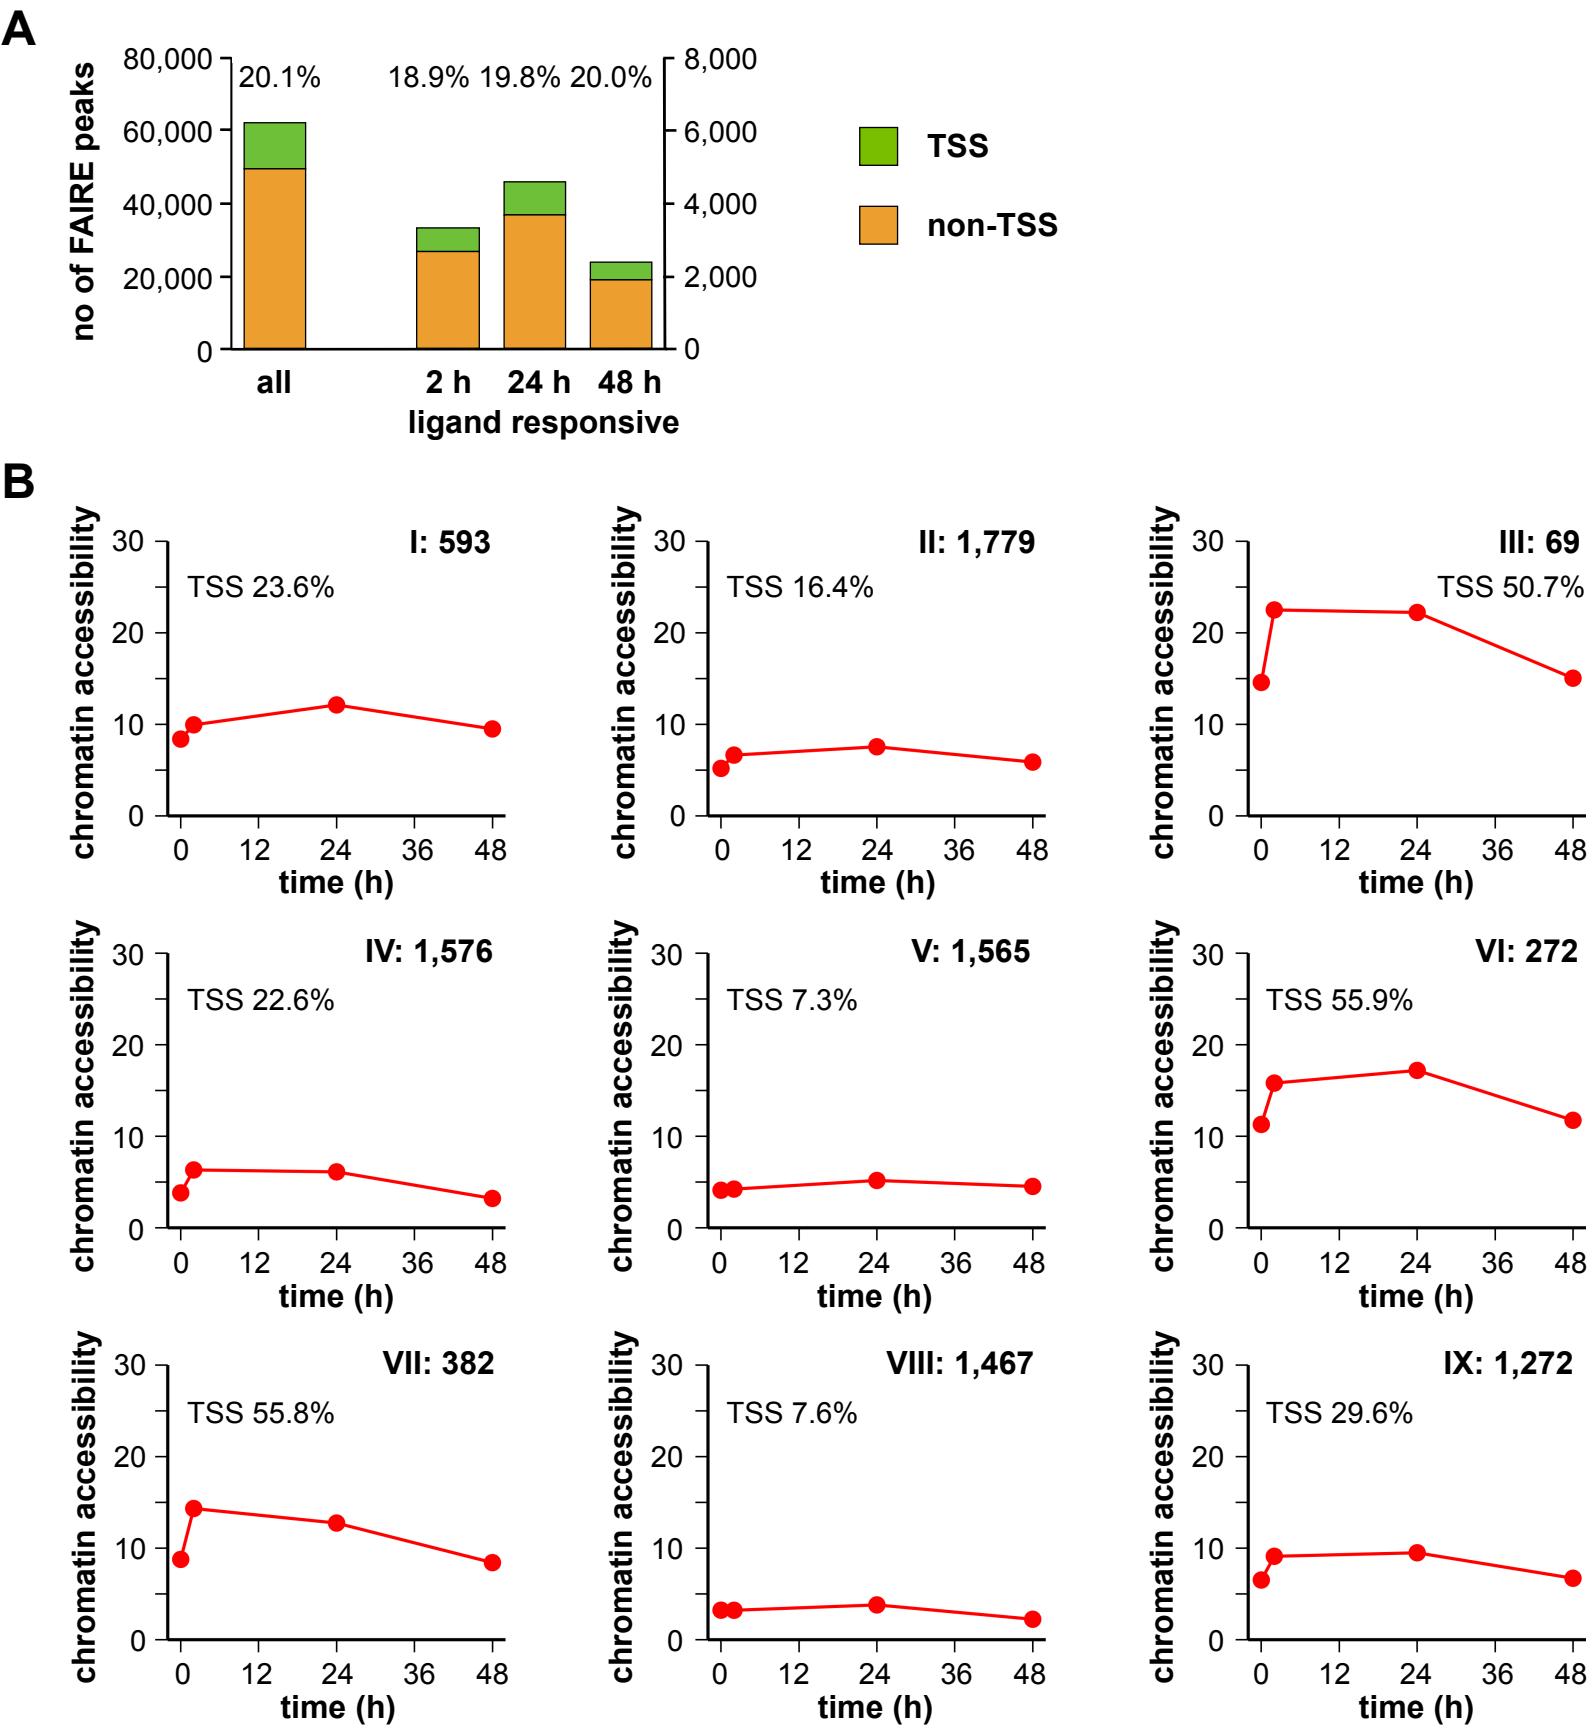

Fig. S4

A Transcription factor binding motif below ligand-modulated FAIRE peaks

| Sequence logo                                                                       | Transcription factor name | p value enrichment |
|-------------------------------------------------------------------------------------|---------------------------|--------------------|
|   | CTCF                      | 1e-417             |
|   | BORIS                     | 1e-338             |
|    | PU.1                      | 1e-320             |
|    | ELF5                      | 1e-256             |
|    | ETS1                      | 1e-228             |
|  | ETV1                      | 1e-193             |
|  | Fli1                      | 1e-173             |
|  | GABPA                     | 1e-168             |
|  | ERG                       | 1e-166             |
|  | Ets-distal                | 1e-116             |

B CTCF binding site overlap between THP-1 and K562 cells

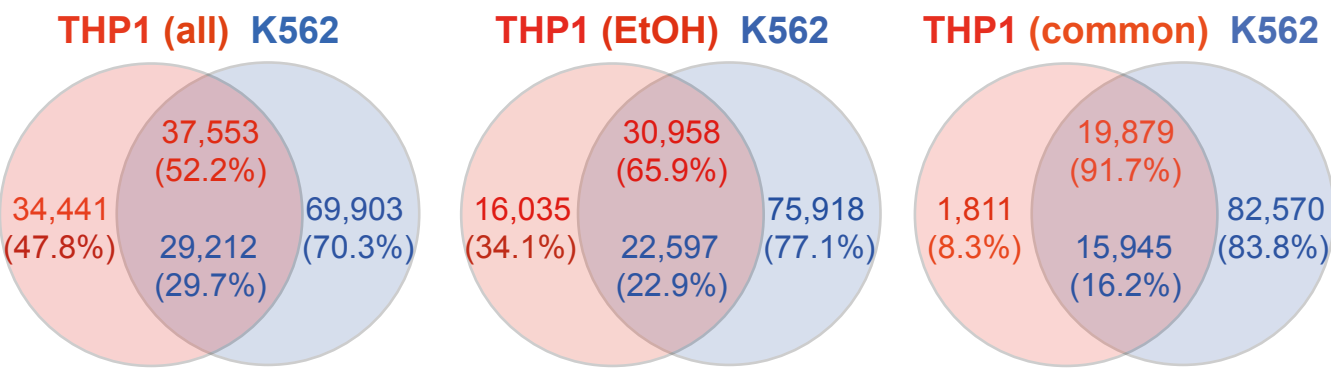

C Transcription factor binding overlap (ENCODE data from K562 cells)

|       | CTCF           | ETS1           | GABPA          | NR2F2          | NR4A1        |
|-------|----------------|----------------|----------------|----------------|--------------|
| CTCF  | 98,515 (100%)  | 9,962 (10.1%)  | 7,633 (7.7%)   | 14,915 (15.1%) | 135 (0.1%)   |
| ETS1  | 12,033 (33.1%) | 36,341 (100%)  | 18,745 (51.6%) | 24,350 (67.0%) | 1,038 (2.9%) |
| GABPA | 8,066 (27.8%)  | 16,236 (56.0%) | 28,995 (100%)  | 21,062 (72.6%) | 397 (1.4%)   |
| NR2F2 | 16,774 (28.3%) | 24,047 (40.5%) | 23,229 (39.2%) | 59,306 (100%)  | 995 (1.7%)   |
| NR4A1 | 156 (12.5%)    | 747 (59.8%)    | 380 (30.4%)    | 765 (61.2%)    | 1,249 (100%) |

Fig. S5

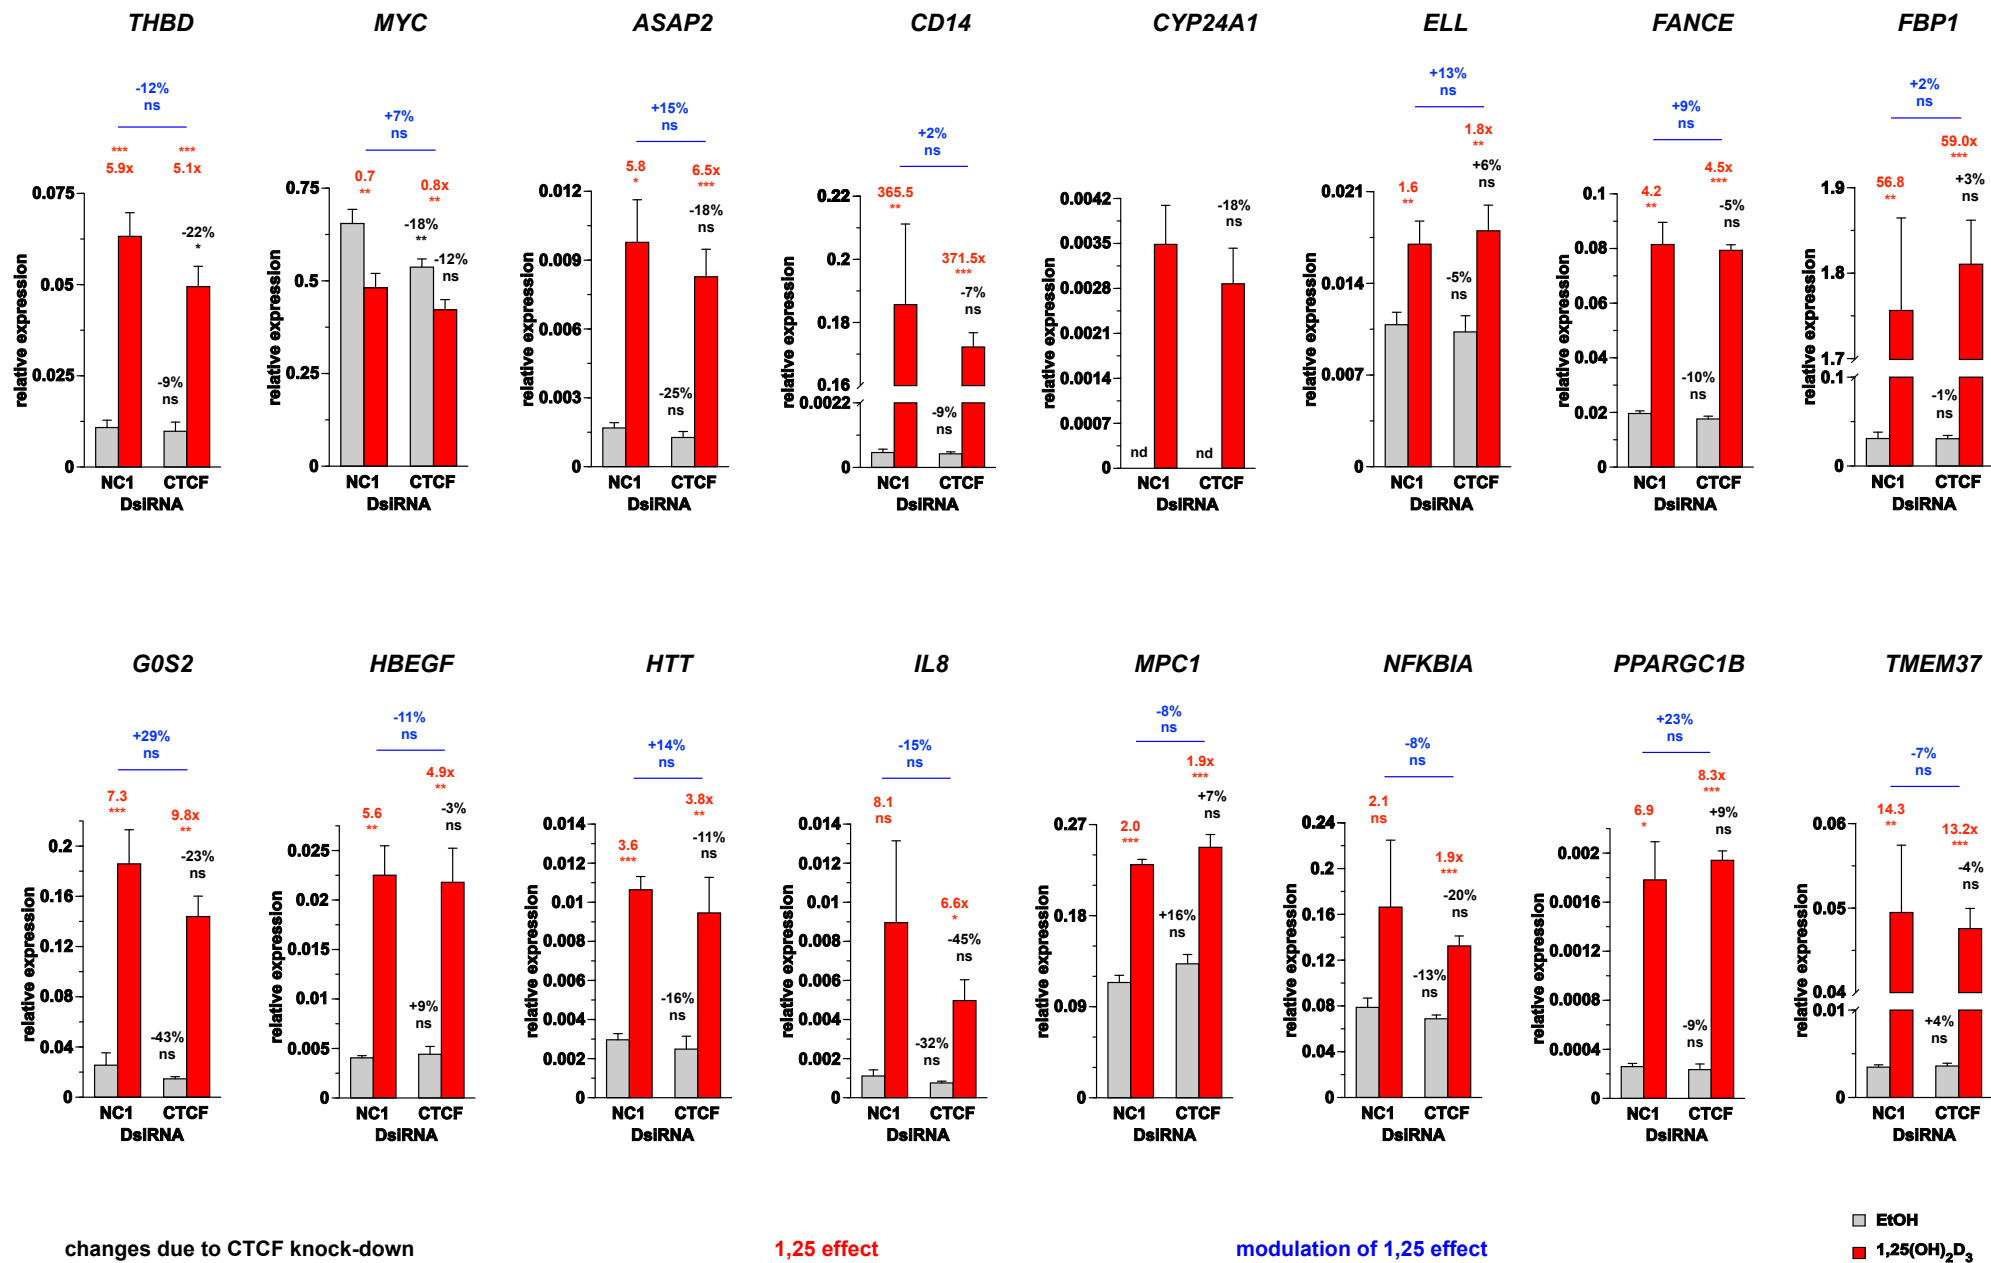

**Fig. S6**

**A**

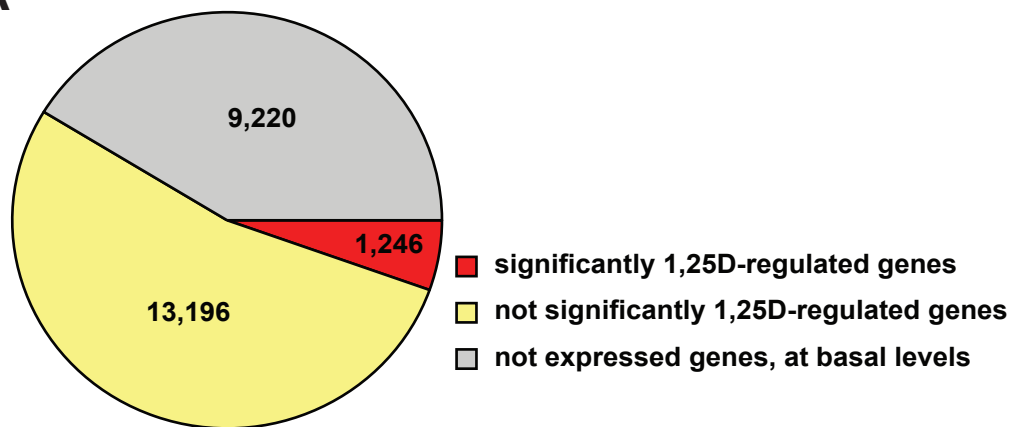

**B**

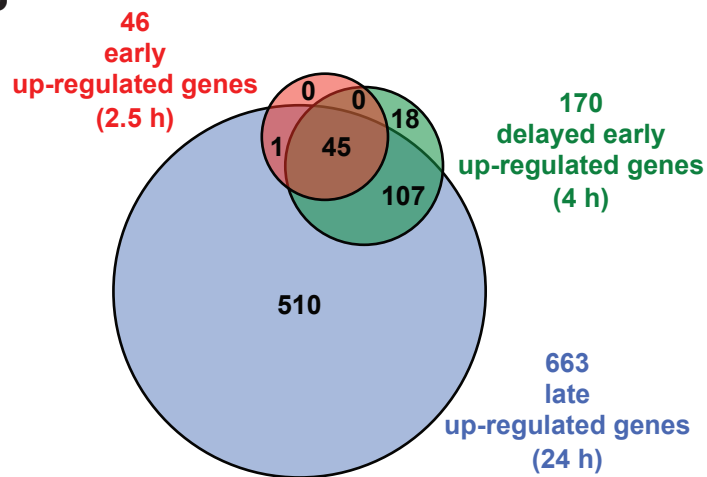

**C**

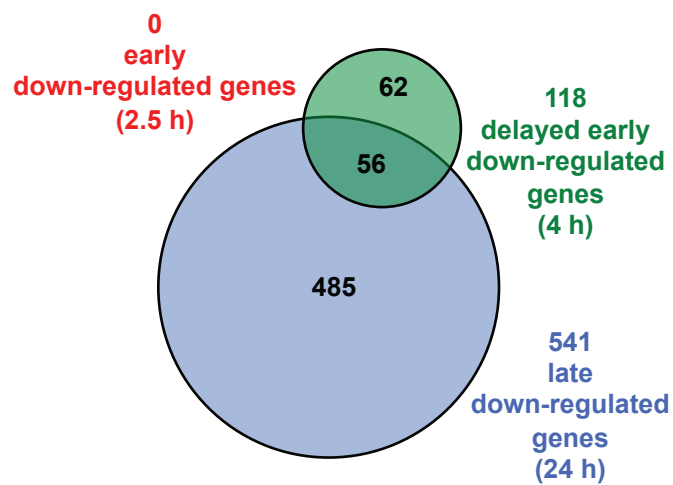

Fig. S7

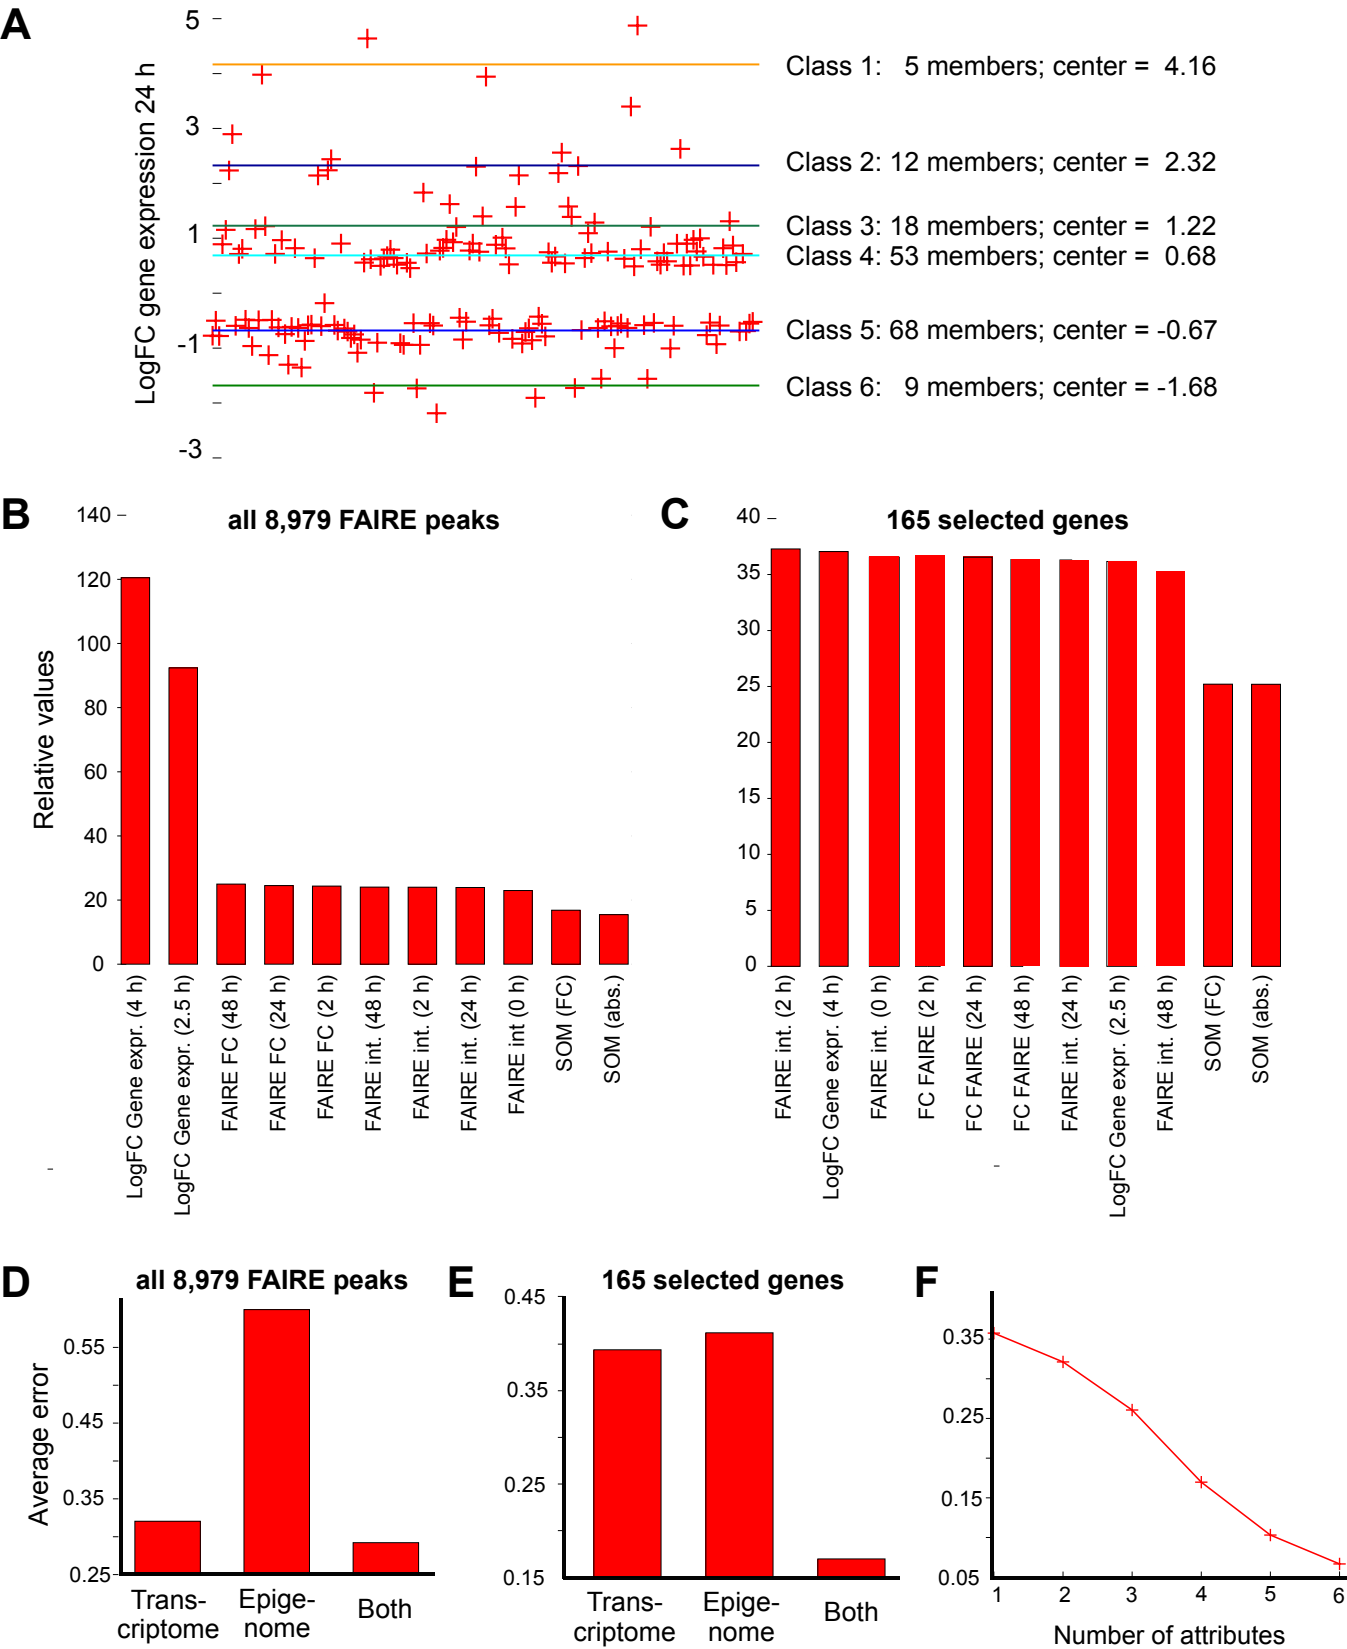

Supplement: gkv1519_Supplementary_Data.zip [file gkv1519_Supplementary_Data.zip]
