# Supplementary material for: Epigenome-wide effects of vitamin D and their impact on the transcriptome of human monocytes involve CTCF
Source: Oxford University Press journal article supplement (doi:10.1093/nar/gkv1519), 2015-12-28
Supplement: gkv1519_Supplementary_Data.zip [file gkv1519_Supplementary_Data.zip]

Archive with 6 entries (6 files):
- nar-01887-x-2015-File008.xlsx
- nar-01887-x-2015-File010.xlsx
- nar-01887-x-2015-File011.xlsx
- nar-01887-x-2015-File009.xlsx
- nar-01887-x-2015-File012.xlsx
- nar-01887-x-2015-File007.pdf
