# Supplementary material for: Epigenome-wide effects of vitamin D and their impact on the transcriptome of human monocytes involve CTCF
Source: Oxford University Press journal article supplement (doi:10.1093/nar/gkv1519), 2015-12-28
Supplement: gkv1519_Supplementary_Data.zip [file gkv1519_Supplementary_Data.zip › nar-01887-x-2015-File008.xlsx]

## Sheet: Sheet1
Chr	Start	End	Average (0 h)	Average (2 h)	Averge (24 h)	Average (48 h)	FC (2 h)	FC (24 h)	FC (48 h)	p val (2 h)	p val (24 h)	p val (48 h)	Sign? (2 h)	Sign? (24 h)	Sign? (48 h)	in hotspot FC?	in hotspot density?	overlap TSS?	TSS gene	SOM class (absolute)	overlap VDR?	DR3-like motif?	SOM class (FC)	overlap CTCF?	CTCF (EtOH)	CTCF (1,25D)	FC CTCF	CTCF motif?
chr1	805136	805426	4.504	9.691	7.691	2.84	2.152	1.708	0.631	0.025	0.462	0.271	yes	no	no	no	yes	no	None	IV	no	no	C	yes	5.29013	5.33052	1.00763	yes
chr1	875413	876476	4.663	7.948	4.875	3.69	1.705	1.046	0.791	0.036	0.967	0.361	yes	no	no	no	yes	no	None	IV	no	no	I	no	0	0	0	no
chr1	890678	891265	6.517	8.79	8.794	7.277	1.349	1.349	1.117	0.021	0.265	0.688	yes	no	no	no	yes	no	None	IX	no	no	F	no	0	0	0	no
chr1	1004286	1004961	8.91	16.533	13.768	6.694	1.856	1.545	0.751	0.234	0.133	0.036	no	no	yes	no	yes	no	None	VII	no	no	I	no	0	0	0	no
chr1	1051166	1052420	4.941	7.944	7.903	5.657	1.608	1.599	1.145	0.17	0.031	0.728	no	yes	no	no	yes	yes	C1orf159	II	no	no	I	no	0	0	0	no
chr1	1057502	1058838	5.747	8.82	9.307	5.539	1.535	1.62	0.964	0.037	0.243	0.769	yes	no	no	no	yes	no	None	IX	no	no	I	yes	4.11455	12.4379	3.0229	no
chr1	1143395	1144918	7.969	10.127	9.268	7.239	1.271	1.163	0.908	0.047	0.497	0.495	yes	no	no	no	yes	no	None	IX	no	no	F	no	0	0	0	no
chr1	1240908	1241638	3.476	6.203	6.617	2.814	1.784	1.903	0.809	0.031	0.43	0.185	yes	no	no	no	yes	no	None	IV	no	no	C	no	0	0	0	no
chr1	1542067	1542816	6.02	6.974	7.7	7.083	1.158	1.279	1.177	0.024	0.945	0.902	yes	no	no	no	no	no	None	II	no	no	F	no	0	0	0	no
chr1	1655601	1656128	5.218	8.344	10.962	6.725	1.599	2.101	1.289	0.083	0.056	0.048	no	no	yes	no	no	yes	CDK11A	IX	no	no	H	no	0	0	0	no
chr1	1820853	1823535	7.157	9.819	8.384	6.457	1.372	1.171	0.902	0.169	0.286	0.041	no	no	yes	no	no	yes	GNB1	IX	no	yes	F	no	0	0	0	no
chr1	1875102	1875729	1.238	6.936	7.293	1.606	5.604	5.892	1.297	0.045	0.045	0.423	yes	yes	no	yes	no	no	None	IV	no	yes	D	yes	5.29013	7.69964	1.45547	no
chr1	2058013	2059115	5.351	5.94	6.275	4.743	1.11	1.173	0.886	0.555	0.026	0.188	no	yes	no	yes	no	no	None	II	no	no	F	no	0	0	0	no
chr1	2073986	2074587	2.925	5	5.791	4.38	1.71	1.98	1.498	0.144	0.017	0.678	no	yes	no	yes	no	no	None	V	no	no	C	no	0	0	0	no
chr1	2192918	2193261	8.548	6.374	6.805	4.428	0.746	0.796	0.518	0.557	0.494	0.01	no	no	yes	yes	no	no	None	II	no	no	G	no	0	0	0	no
chr1	2316401	2316868	3.39	6.516	5.496	3.97	1.922	1.621	1.171	0.031	0.506	0.854	yes	no	no	yes	no	no	None	IV	no	no	C	no	0	0	0	no
chr1	2322358	2323571	18.844	20.099	19.094	21.876	1.067	1.013	1.161	0.241	0.039	0.294	no	yes	no	yes	no	yes	MORN1	III	no	no	F	no	0	0	0	no
chr1	2487075	2488745	5.833	8.186	7.089	7.023	1.403	1.215	1.204	0.018	0.869	0.824	yes	no	no	no	no	yes	TNFRSF14	II	no	no	F	no	0	0	0	no
chr1	3400446	3400839	3.193	8	7.202	1.197	2.505	2.255	0.375	0.022	0.216	0.457	yes	no	no	no	no	no	None	IV	no	no	C	yes	6.20417	4.48486	0.722878	no
chr1	3527004	3528493	2.257	4.318	4.651	2.1	1.913	2.06	0.93	0.005	0.262	0.203	yes	no	no	no	no	yes	MEGF6	VIII	no	no	C	no	0	0	0	no
chr1	3566353	3566945	7.903	14.906	12.792	8.743	1.886	1.619	1.106	0.071	0.031	0.595	no	yes	no	no	no	yes	WRAP73	VII	no	no	C	no	0	0	0	no
chr1	3593176	3595962	5.001	6.582	7.273	6.036	1.316	1.454	1.207	0.039	0.143	0.79	yes	no	no	no	no	no	None	II	no	no	H	no	0	0	0	no
chr1	3691512	3692831	8.77	8.582	11.945	8.185	0.979	1.362	0.933	0.746	0.006	0.86	no	yes	no	no	no	no	None	I	no	no	F	no	0	0	0	no
chr1	3710108	3710602	5.579	10.131	9.915	6.376	1.816	1.777	1.143	0.094	0.004	0.145	no	yes	no	no	no	no	None	IX	no	no	C	no	0	0	0	no
chr1	3759484	3760070	3.88	6.451	6.981	4.925	1.663	1.799	1.269	0.038	0.253	0.808	yes	no	no	no	no	no	None	IV	no	no	H	no	0	0	0	no
chr1	3807334	3808182	4.966	6.348	9.317	7.012	1.278	1.876	1.412	0.259	0.003	0.059	no	yes	no	no	no	no	None	II	no	no	H	no	0	0	0	no
chr1	4044272	4045411	9.74	6.424	6.59	11.024	0.66	0.677	1.132	0.12	0.006	0.726	no	yes	no	no	no	no	None	II	no	no	G	no	0	0	0	no
chr1	4814160	4817526	4.954	6.316	8.301	5.322	1.275	1.675	1.074	0.289	0.047	0.854	no	yes	no	no	no	no	None	II	no	no	H	no	0	0	0	no
chr1	4896550	4897074	6.049	6.009	9.979	6.801	0.993	1.65	1.124	0.411	0.029	0.319	no	yes	no	no	no	no	None	IX	no	no	H	no	0	0	0	no
chr1	6097345	6097840	2.852	5.557	5.773	4.014	1.948	2.024	1.407	0.017	0.263	0.906	yes	no	no	no	no	no	None	IV	no	no	C	no	0	0	0	no
chr1	6229966	6232262	5.329	7.038	7.556	5.482	1.321	1.418	1.029	0.076	0.043	0.509	no	yes	no	no	no	no	None	II	no	no	I	no	0	0	0	no
chr1	6268796	6269761	6.579	10.482	12.054	7.462	1.593	1.832	1.134	0.223	0.019	0.652	no	yes	no	no	no	no	None	I	no	no	H	yes	4.00937	5.9257	1.47796	no
chr1	6452956	6454521	8.363	16.314	16.587	9.573	1.951	1.983	1.145	0.174	0.014	0.268	no	yes	no	no	no	yes	ACOT7	VI	no	no	C	no	0	0	0	no
chr1	6479259	6481069	3.587	5.826	4.784	4.282	1.624	1.334	1.194	0	0.846	0.908	yes	no	no	no	no	yes	HES2	V	no	yes	I	no	0	0	0	no
chr1	6803180	6804285	5.286	5.54	7.13	3.389	1.048	1.349	0.641	0.189	0.03	0.09	no	yes	no	no	no	no	None	IV	no	no	F	no	0	0	0	no
chr1	7135392	7135740	3.598	4.913	5.056	2.126	1.366	1.405	0.591	0.437	0.004	0.365	no	yes	no	no	no	no	None	VIII	no	no	I	no	0	0	0	no
chr1	7959777	7960224	5.957	2.829	5.648	5.883	0.475	0.948	0.988	0.003	0.095	0.531	yes	no	no	no	no	no	None	V	no	no	G	no	0	0	0	no
chr1	7962693	7963145	3.968	5.904	5.354	5.656	1.488	1.349	1.425	0.029	0.506	0.103	yes	no	no	no	no	no	None	V	no	no	H	yes	4.11455	10.3914	2.52553	yes
chr1	8107204	8108536	4.074	1.561	3.714	2.706	0.383	0.912	0.664	0.036	0.54	0.047	yes	no	yes	no	no	no	None	VIII	no	no	G	no	0	0	0	no
chr1	8270939	8273808	5.389	4.621	4.366	4.702	0.858	0.81	0.873	0.043	0.147	0.043	yes	no	yes	no	no	no	None	V	no	no	G	no	0	0	0	no
chr1	8341919	8343788	4.191	5.774	5.483	3.999	1.378	1.308	0.954	0.104	0.027	0.338	no	yes	no	no	no	no	None	IV	no	no	F	no	0	0	0	no
chr1	8383697	8384176	4.035	4.952	4.796	2.361	1.227	1.189	0.585	0.007	0.299	0.167	yes	no	no	no	no	yes	SLC45A1	V	no	no	F	no	0	0	0	no
chr1	8498964	8499482	3.703	6.881	9.863	8.156	1.858	2.663	2.202	0.01	0.006	0.07	yes	yes	no	no	no	no	None	II	no	no	E	no	0	0	0	no
chr1	8712803	8713350	3.659	4.134	4.334	3.96	1.13	1.184	1.082	0.703	0.029	0.907	no	yes	no	no	no	no	None	V	no	no	F	no	0	0	0	no
chr1	8908925	8909229	3.479	4.057	3.126	0.878	1.166	0.899	0.252	0.358	0.456	0.015	no	no	yes	no	no	no	None	VIII	no	no	G	no	0	0	0	yes
chr1	9129528	9130131	1.592	3.452	3.292	3.287	2.168	2.068	2.065	0.073	0.01	0.192	no	yes	no	no	no	yes	SLC2A5	VIII	no	no	E	no	0	0	0	no
chr1	9160387	9161140	5.22	7.518	5.717	3.256	1.44	1.095	0.624	0.014	0.276	0.008	yes	no	yes	no	no	no	None	IV	no	yes	I	no	0	0	0	no
chr1	9161464	9161973	6.196	6.099	9.236	3.96	0.984	1.491	0.639	0.574	0.302	0.043	no	no	yes	no	no	no	None	II	no	no	F	yes	4.11455	8.65952	2.10461	no
chr1	9256477	9257049	3.097	6.55	6.241	5.336	2.115	2.015	1.723	0.002	0.028	0.455	yes	yes	no	no	no	no	None	IV	no	no	E	yes	14.6948	8.8842	0.604581	no
chr1	9360205	9360962	2.189	5.469	4.35	2.133	2.498	1.987	0.974	0.013	0.268	0.672	yes	no	no	no	no	no	None	VIII	no	no	C	no	0	0	0	no
chr1	9381153	9381884	6.325	4.697	5.057	3.927	0.743	0.8	0.621	0.155	0.286	0.003	no	no	yes	no	no	no	None	V	no	no	G	no	0	0	0	no
chr1	9400442	9401336	2.718	5.072	6.528	3.088	1.866	2.402	1.136	0.236	0.03	0.557	no	yes	no	no	no	no	None	IV	no	no	C	no	0	0	0	no
chr1	9485605	9486751	5.382	7.058	8.105	5.691	1.311	1.506	1.057	0.019	0.073	0.856	yes	no	no	no	no	no	None	II	no	no	H	no	0	0	0	no
chr1	9498587	9499058	2.928	5.232	6.711	3.461	1.787	2.292	1.182	0	0.282	0.191	yes	no	no	no	no	no	None	IV	no	no	C	no	0	0	0	no
chr1	9648414	9650360	9.999	8.444	11.009	7.687	0.845	1.101	0.769	0.659	0.92	0.018	no	no	yes	no	no	yes	TMEM201	I	no	no	F	no	0	0	0	no
chr1	9777674	9777981	5.444	7.224	7.232	3.927	1.327	1.329	0.721	0.043	0.059	0.078	yes	no	no	no	no	no	None	II	no	no	I	no	0	0	0	no
chr1	9790478	9791742	12.208	11.234	11.672	11.227	0.92	0.956	0.92	0.007	0.142	0.027	yes	no	yes	no	no	no	None	I	yes	no	F	no	0	0	0	no
chr1	9821662	9822235	4.335	5.413	5.433	1.787	1.249	1.253	0.412	0.087	0.62	0.015	no	no	yes	no	no	no	None	IV	no	no	F	no	0	0	0	no
chr1	9969242	9971336	9.076	13.313	17.072	13.973	1.467	1.881	1.54	0.002	0.439	0.002	yes	no	yes	no	no	yes	CTNNBIP1	VI	no	yes	H	no	0	0	0	no
chr1	9972232	9972677	3.984	4.97	4.733	4.904	1.247	1.188	1.231	0.001	0.358	0.21	yes	no	no	no	no	no	None	V	no	no	F	no	0	0	0	no
chr1	10125239	10125737	3.28	5.398	3.852	2.328	1.646	1.174	0.71	0.004	0.315	0.227	yes	no	no	no	no	no	None	VIII	no	no	I	no	0	0	0	no
chr1	10269780	10271476	13.261	19.695	19.653	10.72	1.485	1.482	0.808	0.278	0.031	0.21	no	yes	no	no	no	yes	KIF1B	VI	no	no	I	yes	6.46571	10.759	1.66401	no
chr1	10554678	10555629	3.566	5.038	5.369	4.835	1.413	1.506	1.356	0.221	0.011	0.821	no	yes	no	no	no	no	None	V	no	no	H	yes	8.81688	13.8398	1.5697	yes
chr1	10706245	10706714	4.251	5.137	3.789	1.425	1.208	0.891	0.335	0.373	0.319	0.017	no	no	yes	no	no	no	None	VIII	no	no	G	no	0	0	0	no
chr1	10753325	10755377	9.74	10.167	8.091	7.879	1.044	0.831	0.809	0.688	0.087	0.022	no	no	yes	no	no	no	None	IX	no	no	G	no	0	0	0	no
chr1	11024979	11027496	5.355	6.411	7.205	6.109	1.197	1.346	1.141	0.003	0.155	0.506	yes	no	no	no	no	no	None	II	no	no	F	no	0	0	0	no
chr1	11029213	11029887	4.253	5.239	6.869	5.554	1.232	1.615	1.306	0.554	0.024	0.027	no	yes	yes	no	no	no	None	II	no	no	H	no	0	0	0	no
chr1	11119121	11121298	10.137	13.524	14.995	10.806	1.334	1.479	1.066	0.488	0.003	0.036	no	yes	yes	no	no	yes	SRM	VI	no	no	H	no	0	0	0	no
chr1	11322509	11322953	2.146	2.64	4.518	3.13	1.23	2.105	1.458	0.184	0.005	0.631	no	yes	no	no	no	yes	MTOR	VIII	no	yes	H	no	0	0	0	no
chr1	11709931	11711111	6.702	7.953	6.385	4.065	1.187	0.953	0.607	0.185	0.694	0.043	no	no	yes	no	no	no	None	IV	no	no	G	yes	7.05618	10.9687	1.55449	no
chr1	11730759	11731926	4.399	3.974	3.854	3.861	0.903	0.876	0.878	0.076	0.023	0.095	no	yes	no	no	no	no	None	V	no	no	G	no	0	0	0	no
chr1	11740439	11741965	9.215	14.088	14.854	8.662	1.529	1.612	0.94	0.214	0.02	0.439	no	yes	no	no	no	yes	MAD2L2	VII	no	yes	I	no	0	0	0	no
chr1	11795779	11797056	11.189	12.52	10.74	7.326	1.119	0.96	0.655	0.34	0.296	0.036	no	no	yes	no	no	yes	AGTRAP	VII	no	no	G	no	0	0	0	no
chr1	11849709	11851582	10.947	11.712	8.56	10.002	1.07	0.782	0.914	0.444	0.061	0.038	no	no	yes	no	no	no	None	I	no	no	F	no	0	0	0	no
chr1	11902224	11903164	5.893	6.527	8.44	6.476	1.108	1.432	1.099	0.219	0.009	0.19	no	yes	no	no	no	no	None	II	no	no	F	no	0	0	0	no
chr1	11989854	11990311	4.966	6.16	8.882	3.815	1.24	1.788	0.768	0.041	0.06	0.296	yes	no	no	no	no	no	None	II	no	no	H	no	0	0	0	no
chr1	12192919	12193573	1.998	4.95	7.576	4.169	2.477	3.791	2.086	0.041	0.01	0.105	yes	yes	no	no	no	no	None	V	no	no	B	no	0	0	0	no
chr1	12233573	12234216	4.345	7.37	7.672	3.496	1.696	1.766	0.804	0.026	0.546	0.198	yes	no	no	no	no	no	None	IV	no	no	I	no	0	0	0	no
chr1	12234886	12235918	3.606	6.489	7.895	5.196	1.799	2.19	1.441	0.018	0.323	0.69	yes	no	no	no	no	no	None	II	no	no	E	no	0	0	0	no
chr1	12268958	12269544	3.555	5.543	5.356	2.172	1.559	1.506	0.611	0.007	0.649	0.184	yes	no	no	no	no	no	None	IV	no	no	I	yes	3.52675	7.10736	2.01527	yes
chr1	12675335	12680848	5.089	6.236	6.201	4.686	1.225	1.218	0.921	0.271	0.096	0.044	no	no	yes	no	no	yes	DHRS3	IV	no	no	F	no	0	0	0	no
chr1	12694181	12694550	3.501	6.598	9.064	5.848	1.885	2.589	1.671	0.197	0.017	0.783	no	yes	no	no	no	no	None	II	no	no	E	no	0	0	0	no
chr1	13990429	13990922	1.327	3.451	4.756	4.364	2.601	3.585	3.29	0.423	0.006	0.423	no	yes	no	yes	no	no	None	V	no	no	B	no	0	0	0	yes
chr1	15104656	15106093	3.701	4.318	3.466	2.975	1.167	0.937	0.804	0.291	0.033	0.091	no	yes	no	yes	no	no	None	VIII	no	no	F	no	0	0	0	no
chr1	15426903	15427660	4.495	6.615	5.261	1.077	1.472	1.17	0.24	0.132	0.849	0.01	no	no	yes	yes	no	no	None	IV	no	no	I	yes	5.87792	10.0688	1.71298	no
chr1	15494931	15495332	1.327	4.468	5.777	4.68	3.368	4.354	3.528	0.158	0	0.151	no	yes	no	yes	no	no	None	V	no	yes	B	no	0	0	0	no
chr1	15539403	15540388	4.729	4.806	5.676	5.683	1.016	1.2	1.202	0.257	0.042	0.429	no	yes	no	no	no	no	None	V	no	no	F	no	0	0	0	no
chr1	15586426	15588583	6.725	10.266	10.718	6.913	1.526	1.594	1.028	0.024	0.401	0.615	yes	no	no	no	no	no	None	IX	no	no	I	no	0	0	0	no
chr1	15672014	15673363	8.719	10.043	13.102	7.776	1.152	1.503	0.892	0.258	0.03	0.08	no	yes	no	no	no	no	None	I	no	no	F	no	0	0	0	no
chr1	15742375	15743341	11.944	15.13	16.306	10.945	1.267	1.365	0.916	0.024	0.088	0.328	yes	no	no	no	no	no	None	VI	no	no	F	no	0	0	0	no
chr1	15910818	15911831	3.225	6.035	5.811	2.987	1.872	1.802	0.926	0.02	0.152	0.751	yes	no	no	no	no	yes	AGMAT	IV	no	no	C	no	0	0	0	no
chr1	15943080	15945141	12.277	21.834	13.742	6.919	1.778	1.119	0.564	0.144	0.174	0.002	no	no	yes	no	no	yes	DDI2	VII	no	no	I	no	0	0	0	no
chr1	15952796	15953256	5.079	3.666	3.135	2.005	0.722	0.617	0.395	0.347	0.324	0.005	no	no	yes	no	no	no	None	VIII	no	no	G	no	0	0	0	no
chr1	16118531	16118839	3.712	10.213	8.292	3.389	2.751	2.234	0.913	0.066	0.005	0.203	no	yes	no	no	no	no	None	IV	no	yes	C	yes	5.29013	4.32235	0.817059	yes
chr1	16126704	16127332	2.481	5.952	4.961	3.195	2.399	1.999	1.288	0.023	0.111	0.302	yes	no	no	no	no	no	None	IV	no	no	C	no	0	0	0	no
chr1	16173100	16176919	8.089	12.013	12.722	8.49	1.485	1.573	1.05	0.227	0.022	0.696	no	yes	no	no	yes	yes	SPEN	VII	no	no	I	no	0	0	0	no
chr1	16290368	16291209	3.011	5.138	7.543	3.906	1.706	2.505	1.297	0.041	0.014	0.282	yes	yes	no	no	yes	no	None	IV	no	no	E	no	0	0	0	no
chr1	16335453	16335838	7.334	8.977	9.197	3.364	1.224	1.254	0.459	0.048	0	0.123	yes	yes	no	no	yes	no	None	IX	no	yes	F	yes	2.64607	8.29192	3.13367	yes
chr1	16358970	16359803	5.656	7.006	8.754	4.423	1.239	1.548	0.782	0.05	0.049	0.821	no	yes	no	no	yes	no	None	II	no	no	I	yes	4.70234	7.10736	1.51145	no
chr1	16576441	16576745	2.851	3.217	4.889	2.984	1.129	1.715	1.047	0.251	0.011	0.384	no	yes	no	no	yes	no	None	VIII	no	no	H	no	0	0	0	no
chr1	16584475	16585494	2.774	5.733	5.049	3.682	2.067	1.82	1.327	0.001	0.074	0.748	yes	no	no	no	yes	no	None	IV	no	no	C	no	0	0	0	no
chr1	16604803	16605584	1.038	2.716	5.847	2.149	2.615	5.631	2.07	0.09	0.036	0.423	no	yes	no	no	yes	no	None	VIII	no	no	B	no	0	0	0	no
chr1	16717842	16719299	2.375	4.682	5.179	3.778	1.972	2.181	1.591	0.021	0.022	0.255	yes	yes	no	no	yes	no	None	V	no	no	E	no	0	0	0	no
chr1	16947488	16948419	5.445	7.178	7.165	3.577	1.318	1.316	0.657	0.022	0.507	0.105	yes	no	no	no	no	no	None	II	no	no	F	yes	3.9691	5.523	1.3915	no
chr1	17050614	17051879	3.84	3.208	2.641	3.747	0.835	0.688	0.976	0.012	0.538	0.014	yes	no	yes	no	no	no	None	VIII	no	no	G	no	0	0	0	no
chr1	17215477	17216328	4.157	5.212	4.714	2.777	1.254	1.134	0.668	0.158	0.194	0.045	no	no	yes	no	no	no	None	V	no	no	F	no	0	0	0	no
chr1	17340245	17340830	8.206	9.508	14.147	9.671	1.159	1.724	1.179	0.038	0.008	0.933	yes	yes	no	no	no	no	None	I	no	no	H	no	0	0	0	no
chr1	17379163	17380918	3.891	4.926	5.431	3.452	1.266	1.396	0.887	0.039	0.559	0.715	yes	no	no	no	no	yes	SDHB	V	no	no	F	no	0	0	0	no
chr1	17452206	17452718	5.171	8.924	8.026	4.936	1.726	1.552	0.955	0.051	0.025	0.303	no	yes	no	no	no	no	None	II	no	no	I	yes	3.52675	5.86482	1.66295	yes
chr1	17533591	17534896	4.787	7.015	8.082	5.836	1.465	1.688	1.219	0.068	0.018	0.971	no	yes	no	no	no	no	None	II	no	no	H	no	0	0	0	no
chr1	17563474	17563871	3.18	4.363	3.316	0.994	1.372	1.043	0.313	0.211	0.468	0.001	no	no	yes	no	no	no	None	VIII	no	no	F	yes	5.29013	5.33052	1.00763	yes
chr1	17603070	17603448	5.646	7.243	7.708	4.195	1.283	1.365	0.743	0.075	0.043	0.24	no	yes	no	no	no	no	None	II	no	no	I	no	0	0	0	no
chr1	17613865	17614370	4.694	6.644	6.189	3.722	1.415	1.318	0.793	0.062	0.097	0.025	no	no	yes	no	no	no	None	IV	no	yes	I	no	0	0	0	no
chr1	17746316	17746760	6.743	10.298	9.275	5.185	1.527	1.375	0.769	0.228	0.034	0.138	no	yes	no	no	no	no	None	IX	no	no	I	yes	9.40467	5.17484	0.550242	yes
chr1	17862813	17863425	7.168	8.392	11.398	8.183	1.171	1.59	1.142	0.419	0.036	0.369	no	yes	no	no	no	no	None	IX	no	no	H	no	0	0	0	no
chr1	17895488	17897832	4.639	5.179	5.089	3.835	1.116	1.097	0.827	0.023	0.836	0.23	yes	no	no	no	no	no	None	V	no	no	F	no	0	0	0	no
chr1	17912734	17913436	2.342	4.149	6.356	2.409	1.771	2.714	1.028	0.046	0.108	0.26	yes	no	no	no	no	no	None	VIII	no	no	C	no	0	0	0	no
chr1	17961068	17963070	8.593	11.766	13.32	14.73	1.369	1.55	1.714	0.009	0.339	0.018	yes	no	yes	no	no	no	None	I	no	no	H	no	0	0	0	no
chr1	17980174	17980607	5.584	6.202	6.683	1.787	1.111	1.197	0.32	0.385	0.318	0.036	no	no	yes	no	no	no	None	IV	no	no	F	yes	4.11455	9.47648	2.30316	yes
chr1	18923958	18924232	2.876	3.312	6.165	2.24	1.152	2.143	0.779	0.017	0.038	0.184	yes	yes	no	yes	no	no	None	VIII	no	no	H	no	0	0	0	yes
chr1	19201742	19202310	4.334	6.346	5.806	1.335	1.464	1.34	0.308	0.442	0.055	0.001	no	no	yes	yes	no	no	None	IV	no	no	I	yes	6.33215	8.29192	1.3095	yes
chr1	19239548	19240061	5.018	8.985	6.69	0.947	1.79	1.333	0.189	0.018	0.939	0.219	yes	no	no	yes	no	no	None	IV	no	no	I	yes	5.29013	12.839	2.42698	yes
chr1	19248769	19249075	2.723	3.589	6.554	1.279	1.318	2.407	0.47	0.221	0.008	0.192	no	yes	no	no	no	no	None	VIII	no	no	H	no	0	0	0	no
chr1	19763161	19763703	4.778	5.392	7.263	4.922	1.128	1.52	1.03	0.721	0.002	0.481	no	yes	no	no	no	no	None	II	no	no	F	no	0	0	0	no
chr1	19781260	19781673	4.261	4.699	5.349	1.243	1.103	1.255	0.292	0.436	0.789	0.003	no	no	yes	no	no	no	None	V	no	no	F	no	0	0	0	no
chr1	19814202	19815096	2.554	4.739	4.243	2.394	1.855	1.661	0.937	0.049	0.516	0.639	yes	no	no	no	no	no	None	VIII	no	no	I	no	0	0	0	no
chr1	19831696	19832773	7.296	9.761	14.318	12.28	1.338	1.962	1.683	0.019	0.036	0.449	yes	yes	no	no	no	no	None	I	no	no	H	no	0	0	0	no
chr1	19843459	19843849	4.536	3.098	4.34	1.968	0.683	0.957	0.434	0.313	0.671	0.018	no	no	yes	no	no	no	None	VIII	no	no	G	no	0	0	0	no
chr1	19905847	19906781	3.894	5.673	6.476	4.231	1.457	1.663	1.087	0.05	0.455	0.275	yes	no	no	no	no	no	None	IV	no	no	H	no	0	0	0	no
chr1	19932371	19932791	4.129	1.354	1.343	2.514	0.328	0.325	0.609	0.016	0.222	0.07	yes	no	no	no	no	no	None	VIII	no	no	G	no	0	0	0	no
chr1	20373540	20374010	2.497	5.177	6.25	4.322	2.073	2.503	1.731	0.184	0.033	0.187	no	yes	no	no	no	no	None	IV	no	no	E	no	0	0	0	no
chr1	20422437	20422885	1.33	1.142	7.557	5.853	0.859	5.684	4.402	0.423	0.032	0.148	no	yes	no	no	no	no	None	II	no	no	B	no	0	0	0	no
chr1	20453696	20454449	6.6	1.721	4.704	5.496	0.261	0.713	0.833	0	0.024	0.009	yes	yes	yes	no	no	no	None	V	no	no	G	no	0	0	0	no
chr1	20539131	20539861	3.893	5.862	7.636	5.243	1.506	1.961	1.347	0.002	0.01	0.968	yes	yes	no	no	no	no	None	II	no	no	H	yes	5.87792	4.85488	0.825952	yes
chr1	20901676	20902160	5.43	7.109	9.732	4.284	1.309	1.792	0.789	0.058	0.006	0.143	no	yes	no	no	no	no	None	II	no	no	H	yes	4.40254	6.51508	1.47985	yes
chr1	20986931	20989072	3.96	4.923	5.097	3.909	1.243	1.287	0.987	0.045	0.421	0.423	yes	no	no	no	no	yes	DDOST	V	no	no	F	no	0	0	0	no
chr1	21058581	21059102	3.573	8.247	5.911	4.364	2.308	1.654	1.221	0.04	0.791	0.55	yes	no	no	no	no	yes	SH2D5	IV	no	no	C	no	0	0	0	no
chr1	21291014	21291734	3.47	2.488	4.69	2.766	0.717	1.352	0.797	0.18	0.037	0.565	no	yes	no	no	no	no	None	VIII	no	no	F	no	0	0	0	no
chr1	21581625	21582188	5.886	7.832	9.138	7.266	1.33	1.552	1.234	0.066	0.024	0.01	no	yes	yes	no	no	no	None	IX	no	no	H	yes	3.95623	6.38761	1.61457	yes
chr1	21587409	21589617	3.595	3.674	5.925	3.207	1.022	1.648	0.892	0.815	0.011	0.218	no	yes	no	no	no	no	None	IV	no	no	F	no	0	0	0	no
chr1	21710768	21711460	5.543	6.498	8.151	7.362	1.172	1.47	1.328	0.009	0.002	0.096	yes	yes	no	no	no	no	None	II	no	no	H	no	0	0	0	no
chr1	21978063	21978582	3.659	7.288	5.663	3.33	1.992	1.548	0.91	0.023	0.544	0.649	yes	no	no	no	no	yes	RAP1GAP	IV	no	no	I	no	0	0	0	no
chr1	21995390	21997167	3.764	6.509	6.793	4.012	1.729	1.805	1.066	0.007	0.617	0.838	yes	no	no	no	no	yes	RAP1GAP	IV	no	no	C	no	0	0	0	no
chr1	22107919	22110586	8.806	11.335	9.572	7.236	1.287	1.087	0.822	0.223	0.767	0.025	no	no	yes	no	no	yes	USP48	IX	no	no	F	no	0	0	0	yes
chr1	22183578	22185125	7.104	11.297	10.908	8.378	1.59	1.535	1.179	0.139	0.008	0.027	no	yes	yes	no	no	no	None	I	no	no	I	no	0	0	0	no
chr1	22468276	22470038	2.329	5.622	4.839	2.723	2.414	2.078	1.169	0.029	0.324	0.638	yes	no	no	no	no	yes	WNT4	IV	no	no	C	no	0	0	0	no
chr1	22743011	22743363	3.62	6.703	7.302	3.146	1.852	2.017	0.869	0.012	0.059	0.19	yes	no	no	no	no	no	None	IV	no	no	C	yes	3.52809	16.5838	4.70052	yes
chr1	22968513	22968798	3.397	6.313	8.022	3.903	1.859	2.361	1.149	0.164	0.002	0.013	no	yes	yes	no	no	no	None	IV	no	no	C	yes	4.24756	6.90762	1.62626	yes
chr1	23172938	23173408	5.197	5.907	4.98	1.243	1.137	0.958	0.239	0.46	0.678	0.045	no	no	yes	yes	no	no	None	IV	no	no	G	no	0	0	0	no
chr1	23256847	23257147	5.022	6.163	2.099	3.055	1.227	0.418	0.608	0.248	0.007	0.136	no	yes	no	yes	no	no	None	IV	no	no	G	yes	3.44676	8.19732	2.37827	yes
chr1	23302906	23303407	7.781	8.54	11.333	6.427	1.098	1.457	0.826	0.157	0.04	0.118	no	yes	no	yes	no	no	None	IX	no	no	F	yes	7.47578	11.2533	1.5053	yes
chr1	23496225	23496701	1.834	3.222	3.699	1.944	1.757	2.016	1.06	0.051	0.024	0.921	no	yes	no	yes	no	no	None	VIII	no	no	C	no	0	0	0	no
chr1	23503726	23505021	4.577	9.584	8.948	4.471	2.094	1.955	0.977	0.145	0.001	0.224	no	yes	no	yes	no	no	None	IX	no	no	C	no	0	0	0	no
chr1	23753400	23753715	2.605	5.496	1.859	1.554	2.109	0.714	0.597	0.038	0.294	0.208	yes	no	no	yes	no	no	None	VIII	no	no	I	no	0	0	0	no
chr1	23760847	23761283	4.685	3.58	3.219	1.038	0.764	0.687	0.221	0.722	0.346	0.018	no	no	yes	yes	no	no	None	VIII	no	no	G	no	0	0	0	no
chr1	23880733	23881801	7.51	11.702	10.883	7.139	1.558	1.449	0.951	0.013	0.189	0.329	yes	no	no	yes	no	no	None	IX	no	yes	I	no	0	0	0	no
chr1	23885658	23886317	11.55	15.852	18.693	12.257	1.373	1.619	1.061	0.074	0.036	0.392	no	yes	no	yes	no	yes	ID3	VI	no	no	H	no	0	0	0	no
chr1	24125992	24128280	10.532	14.14	10.029	8.366	1.342	0.952	0.794	0.106	0.025	0.681	no	yes	no	yes	no	yes	GALE	VII	no	no	F	no	0	0	0	no
chr1	24164977	24165406	5.617	10.912	9.894	5.622	1.943	1.762	1.001	0.08	0.012	0.808	no	yes	no	yes	no	no	None	IX	no	no	C	no	0	0	0	no
chr1	24223607	24224530	4.186	5.783	9.332	7.469	1.382	2.23	1.784	0.615	0.037	0.387	no	yes	no	no	no	no	None	II	no	no	E	no	0	0	0	no
chr1	24225482	24225932	4.5	2.819	5.386	5.713	0.626	1.197	1.269	0.146	0.888	0.037	no	no	yes	no	no	no	None	V	no	yes	F	no	0	0	0	no
chr1	24242621	24243687	5.993	7.629	8.457	6.246	1.273	1.411	1.042	0.024	0.285	0.173	yes	no	no	no	no	no	None	II	no	no	F	yes	3.52675	3.79488	1.07603	no
chr1	24517424	24517970	2.766	4.661	6.357	5.372	1.685	2.299	1.942	0.01	0.008	0.255	yes	yes	no	no	no	no	None	V	no	no	E	no	0	0	0	no
chr1	24524327	24524819	5.779	4.552	6.714	5.619	0.788	1.162	0.972	0.227	0.303	0.04	no	no	yes	no	no	no	None	II	no	no	F	no	0	0	0	no
chr1	24642857	24643550	4.917	6.14	6.087	1.243	1.249	1.238	0.253	0.373	0.214	0.014	no	no	yes	no	no	no	None	IV	no	no	F	no	0	0	0	no
chr1	24739363	24740640	10.571	15.187	15.998	10.503	1.437	1.513	0.994	0.068	0.047	0.878	no	yes	no	no	no	yes	STPG1	VI	no	no	I	no	0	0	0	no
chr1	24744952	24746156	7.618	11.486	9.586	8.304	1.508	1.258	1.09	0.047	0.7	0.593	yes	no	no	no	no	no	None	IX	no	no	I	no	0	0	0	no
chr1	24807574	24808694	6.413	6.729	11.699	6.314	1.049	1.824	0.985	0.13	0.012	0.818	no	yes	no	no	no	no	None	IX	no	no	F	no	0	0	0	no
chr1	24827794	24830147	11.36	10.989	9.351	7.93	0.967	0.823	0.698	0.488	0.043	0.146	no	yes	no	no	no	yes	RCAN3AS	IX	no	no	G	no	0	0	0	no
chr1	24861406	24861911	3.928	7.456	7.243	3.862	1.898	1.844	0.983	0.036	0.092	0.303	yes	no	no	no	no	no	None	IV	no	no	C	no	0	0	0	no
chr1	24885416	24886249	4.37	7.069	9.182	6.583	1.618	2.101	1.507	0.09	0.033	0.339	no	yes	no	no	no	no	None	II	no	no	H	no	0	0	0	no
chr1	25053821	25054448	12.641	15.719	18.421	11.373	1.244	1.457	0.9	0.102	0.044	0.219	no	yes	no	no	no	no	None	VI	no	no	I	no	0	0	0	no
chr1	25088717	25089388	5.313	4.428	4.225	3.905	0.833	0.795	0.735	0.256	0.457	0.016	no	no	yes	no	no	no	None	V	no	no	G	no	0	0	0	no
chr1	25127698	25128029	4.682	2.787	4.212	3.595	0.595	0.9	0.768	0.146	0.504	0.027	no	no	yes	no	no	no	None	VIII	no	no	G	no	0	0	0	no
chr1	25176222	25176544	6.539	4.6	5.609	2.351	0.704	0.858	0.36	0.113	0.483	0.019	no	no	yes	no	no	no	None	V	no	yes	G	yes	7.9382	5.33052	0.671502	no
chr1	25252678	25253621	4.616	5.026	3.104	4.129	1.089	0.673	0.895	0.046	0.371	0.342	yes	no	no	no	no	no	None	V	no	no	F	no	0	0	0	no
chr1	25258476	25259176	5.341	7.269	5.335	2.723	1.361	0.999	0.51	0.199	0.726	0.046	no	no	yes	no	no	no	None	IV	no	yes	G	yes	8.22909	8.8842	1.07961	no
chr1	25280692	25282208	2.898	5.636	6.885	4.781	1.945	2.376	1.65	0.205	0.015	0.082	no	yes	no	no	no	no	None	IV	no	no	E	no	0	0	0	no
chr1	25333756	25335251	5.401	5.381	4.914	4.145	0.996	0.91	0.767	0.23	0.342	0.039	no	no	yes	no	no	no	None	V	no	no	G	no	0	0	0	yes
chr1	25347004	25349854	9.711	15.74	11.226	8.16	1.621	1.156	0.84	0.003	0.079	0.429	yes	no	no	no	no	no	None	VII	no	no	I	no	0	0	0	no
chr1	25446752	25447195	4.582	4.593	5.678	4.833	1.002	1.239	1.055	0.901	0.05	0.533	no	yes	no	no	no	no	None	V	no	no	F	no	0	0	0	no
chr1	25458088	25458819	4.362	3.119	7.353	4.261	0.715	1.686	0.977	0.139	0.08	0.048	no	no	yes	no	no	no	None	V	no	no	F	no	0	0	0	no
chr1	25466487	25467283	5.327	7.501	6.428	4.865	1.408	1.207	0.913	0.089	0.024	0.396	no	yes	no	no	no	no	None	II	no	no	F	no	0	0	0	no
chr1	25553192	25553621	5.437	7.539	8.996	4.79	1.387	1.655	0.881	0.03	0.189	0.382	yes	no	no	no	no	no	None	II	no	no	I	no	0	0	0	no
chr1	25831620	25832476	3.162	3.939	3.304	5.611	1.246	1.045	1.774	0.789	0.781	0.015	no	no	yes	no	no	no	None	V	no	no	F	no	0	0	0	no
chr1	25950338	25951368	2.352	4.221	6.738	3.517	1.795	2.865	1.495	0.224	0.008	0.3	no	yes	no	no	no	no	None	V	no	no	E	no	0	0	0	no
chr1	26097551	26098199	2.987	4.11	5.651	4.38	1.376	1.892	1.467	0.796	0.039	0.19	no	yes	no	yes	yes	no	None	V	no	yes	H	no	0	0	0	no
chr1	26253925	26254463	4.275	2.768	2.506	1.153	0.647	0.586	0.27	0.812	0.318	0.031	no	no	yes	yes	yes	no	None	VIII	no	yes	G	no	0	0	0	no
chr1	26338936	26339678	2.362	1.409	4.766	1.606	0.597	2.017	0.68	0.185	0.027	0.185	no	yes	no	yes	yes	no	None	VIII	no	no	G	no	0	0	0	no
chr1	26346186	26346718	4.217	4.552	6.589	4.348	1.079	1.562	1.031	0.654	0.039	0.767	no	yes	no	yes	yes	no	None	V	no	no	F	no	0	0	0	no
chr1	26490216	26491083	3.304	7.065	5.941	1.606	2.139	1.798	0.486	0.017	0.301	0.206	yes	no	no	yes	yes	no	None	IV	no	no	C	yes	4.70234	4.73824	1.00763	no
chr1	26613434	26614168	3.874	5.428	3.382	2.555	1.401	0.873	0.66	0.029	0.748	0.463	yes	no	no	yes	yes	no	None	VIII	no	no	G	no	0	0	0	no
chr1	26614661	26617691	5.247	7.053	6.316	7.091	1.344	1.204	1.351	0.09	0.033	0.893	no	yes	no	yes	yes	no	None	II	no	no	H	no	0	0	0	no
chr1	26643667	26644012	4.751	6.68	7.558	4.328	1.406	1.591	0.911	0.254	0.023	0.081	no	yes	no	yes	yes	no	None	II	no	no	I	no	0	0	0	no
chr1	26672747	26673091	1.158	3.347	5.128	4.259	2.889	4.427	3.676	0.423	0.016	0.147	no	yes	no	yes	yes	no	None	V	no	no	B	no	0	0	0	no
chr1	26690241	26690866	5.919	12.397	12.77	5.537	2.094	2.157	0.935	0.035	0.006	0.377	yes	yes	no	yes	yes	no	None	VII	no	no	C	yes	6.30044	9.81413	1.55769	yes
chr1	26704598	26705345	6.188	7.586	8.122	2.654	1.226	1.312	0.429	0.052	0.09	0.012	no	no	yes	no	no	no	None	II	no	no	F	no	0	0	0	no
chr1	26946248	26948335	9.125	11.95	13.09	8.622	1.31	1.435	0.945	0.131	0.011	0.075	no	yes	no	no	no	no	None	VII	no	no	I	yes	4.13611	6.17894	1.4939	no
chr1	27018707	27020148	3.126	4.973	5.18	3.707	1.591	1.657	1.186	0.017	0.378	0.739	yes	no	no	no	no	no	None	V	no	no	H	no	0	0	0	no
chr1	27021601	27024020	6.098	8.128	6.973	6.283	1.333	1.144	1.03	0.048	0.905	1	yes	no	no	no	no	yes	ARID1A	II	no	no	F	no	0	0	0	no
chr1	27136567	27136877	4.414	6.41	6.302	2.059	1.452	1.428	0.466	0.078	0.089	0.014	no	no	yes	no	no	no	None	IV	no	no	I	yes	4.3944	5.29623	1.20522	yes
chr1	27179569	27180471	5.698	5.258	7.002	3.144	0.923	1.229	0.552	0.033	0.288	0.018	yes	no	yes	no	no	no	None	IV	no	no	F	yes	7.05618	8.29192	1.17513	no
chr1	27226437	27227380	5.682	8.81	7.544	7.85	1.55	1.328	1.381	0.037	0.944	0.836	yes	no	no	no	no	yes	GPATCH3	IX	no	no	H	no	0	0	0	no
chr1	27319876	27321254	3.256	6.319	4.924	3.801	1.941	1.512	1.167	0.016	0.414	0.877	yes	no	no	no	no	yes	TRNP1	IV	no	no	C	no	0	0	0	no
chr1	27324000	27324646	5.316	7.351	11.681	7.007	1.383	2.197	1.318	0.074	0.049	0.779	no	yes	no	no	yes	no	None	IX	no	yes	H	yes	3.52809	8.19732	2.32344	yes
chr1	27371077	27371401	4.28	8.063	7.73	4.445	1.884	1.806	1.039	0.02	0.316	0.831	yes	no	no	no	yes	no	None	II	no	no	C	no	0	0	0	yes
chr1	27438472	27438964	3.302	3.458	3.346	2.684	1.047	1.013	0.813	0.008	0.736	0.115	yes	no	no	no	yes	no	None	VIII	no	no	F	no	0	0	0	no
chr1	27518427	27519704	3.2	3.943	7.1	6.476	1.232	2.218	2.024	0.236	0.025	0.221	no	yes	no	no	yes	no	None	V	no	no	E	no	0	0	0	no
chr1	27524501	27524931	4.373	1.306	3.026	3.192	0.299	0.692	0.73	0.002	0.371	0.593	yes	no	no	no	yes	no	None	VIII	no	no	G	yes	4.58214	9.47648	2.06813	yes
chr1	27694205	27694976	2.65	6.158	4.18	3.336	2.324	1.577	1.259	0.006	0.207	0.758	yes	no	no	no	yes	no	None	IV	no	no	C	no	0	0	0	no
chr1	27922722	27923110	5.91	7.686	6.809	3.357	1.3	1.152	0.568	0.272	0.904	0.048	no	no	yes	no	yes	no	None	IV	no	no	F	no	0	0	0	no
chr1	27932838	27934476	5.034	6.212	6.708	3.044	1.234	1.333	0.605	0.04	0.017	0.051	yes	yes	no	no	yes	no	None	IV	no	no	F	yes	5.8595	5.29623	0.903871	no
chr1	27952488	27953487	5.21	5.162	7.562	5.574	0.991	1.451	1.07	0.296	0.049	0.735	no	yes	no	no	yes	yes	FGR	II	no	no	F	no	0	0	0	no
chr1	27993194	27994598	4.995	5.845	8.167	3.28	1.17	1.635	0.657	0.254	0.029	0.11	no	yes	no	no	yes	no	None	IV	no	no	F	no	0	0	0	no
chr1	28099486	28099851	5.101	6.493	6.688	4.671	1.273	1.311	0.916	0.264	0.203	0.05	no	no	yes	no	yes	yes	STX12	II	no	no	F	no	0	0	0	no
chr1	28210051	28214477	7.671	10.779	12.338	11.256	1.405	1.608	1.467	0.021	0.192	0.35	yes	no	no	no	yes	no	None	I	no	no	H	no	0	0	0	no
chr1	28217671	28218552	5.798	5.128	8.963	4.17	0.885	1.546	0.719	0.411	0.015	0.076	no	yes	no	no	yes	no	None	II	no	no	F	no	0	0	0	no
chr1	28240326	28241548	2.874	4.706	4.436	2.941	1.637	1.543	1.023	0.167	0.005	0.119	no	yes	no	no	yes	yes	RPA2	VIII	no	no	I	no	0	0	0	no
chr1	28461918	28462505	3.428	3.208	6.911	5.98	0.936	2.016	1.744	0.592	0.018	0.461	no	yes	no	no	yes	no	None	V	no	no	H	no	0	0	0	no
chr1	28465692	28466217	2.672	3.211	5.354	5.255	1.202	2.004	1.967	0.869	0.005	0.343	no	yes	no	no	yes	no	None	V	no	no	H	no	0	0	0	no
chr1	28502524	28503728	4.562	8.271	8.414	5.546	1.813	1.844	1.216	0.102	0.003	0.647	no	yes	no	no	yes	yes	PTAFR	II	no	no	C	no	0	0	0	no
chr1	28764443	28764830	2.456	4.391	5.509	5.236	1.788	2.243	2.132	0.012	0.019	0.178	yes	yes	no	no	no	yes	PHACTR4	V	no	no	E	no	0	0	0	no
chr1	28832120	28834216	2.671	3.653	5.069	3.646	1.368	1.898	1.365	0.198	0.016	0.697	no	yes	no	no	no	yes	SNHG3	V	no	no	H	no	0	0	0	no
chr1	29447647	29449157	2.809	4.935	3.501	1.696	1.757	1.246	0.604	0.023	0.188	0.184	yes	no	no	no	no	yes	TMEM200B	VIII	no	no	I	no	0	0	0	no
chr1	29557106	29557725	13.63	17.401	15.742	12.31	1.277	1.155	0.903	0.156	0.006	0.133	no	yes	no	no	no	yes	MECR	VI	no	no	F	no	0	0	0	no
chr1	29575693	29576000	3.894	6.911	6.185	4.349	1.775	1.588	1.117	0.042	0.514	0.852	yes	no	no	no	no	no	None	IV	no	no	I	no	0	0	0	no
chr1	29585799	29586800	4.096	8.997	7.552	3.272	2.197	1.844	0.799	0.032	0.032	0.332	yes	yes	no	no	no	no	None	IV	no	no	C	no	0	0	0	no
chr1	31255200	31256955	6.084	8.511	10.346	6.506	1.399	1.7	1.069	0.159	0.009	0.835	no	yes	no	no	no	no	None	IX	no	no	H	yes	19.3971	7.69964	0.396947	no
chr1	31263530	31264143	2.597	4.345	6.421	4.508	1.673	2.472	1.736	0.002	0.075	0.154	yes	no	no	no	no	no	None	V	no	no	E	no	0	0	0	no
chr1	31295996	31296439	5.958	6.167	5.911	4.119	1.035	0.992	0.691	0.279	0.793	0.044	no	no	yes	no	no	no	None	IV	no	no	F	no	0	0	0	no
chr1	31313461	31314166	10.235	12.563	16.794	12.74	1.228	1.641	1.245	0.461	0.035	0.632	no	yes	no	no	no	no	None	VI	no	yes	H	no	0	0	0	no
chr1	31364574	31366018	6.452	6.846	7.595	3.324	1.061	1.177	0.515	0.206	0.141	0.014	no	no	yes	no	no	no	None	II	no	no	F	no	0	0	0	no
chr1	31380900	31383758	3.145	5.275	4.947	4.7	1.677	1.573	1.494	0.02	0.468	0.582	yes	no	no	no	no	yes	SDC3	V	no	no	H	no	0	0	0	no
chr1	31885547	31887564	4.606	7.548	7.412	5.021	1.639	1.609	1.09	0.038	0.056	0.649	yes	no	no	no	no	yes	SERINC2	II	no	no	I	no	0	0	0	no
chr1	32166381	32167055	1.036	5.45	5.453	3.718	5.259	5.262	3.588	0.046	0.072	0.287	yes	no	no	no	no	no	None	IV	yes	yes	A	no	0	0	0	no
chr1	32211214	32211602	5.128	8.398	7.118	3.623	1.637	1.388	0.707	0.024	0.304	0.294	yes	no	no	no	no	no	None	II	no	no	I	no	0	0	0	yes
chr1	32228248	32228783	5.678	10.167	11.988	5.441	1.791	2.112	0.958	0.194	0.05	0.244	no	yes	no	no	no	no	None	IX	no	no	C	no	0	0	0	no
chr1	32281487	32281859	6.898	11.149	13.556	7.531	1.616	1.965	1.092	0.155	0.048	0.706	no	yes	no	no	no	yes	SPOCD1	I	no	no	C	yes	4.3944	5.29623	1.20522	no
chr1	32420157	32420831	4.476	3.546	5.007	2.387	0.792	1.119	0.533	0.895	0.284	0.029	no	no	yes	no	no	no	None	VIII	no	no	G	no	0	0	0	no
chr1	32470991	32471457	5.727	5.606	8.176	5.384	0.979	1.428	0.94	0.435	0.027	0.142	no	yes	no	no	no	no	None	II	no	no	F	no	0	0	0	no
chr1	32538096	32539383	7.134	13.882	11.54	7.462	1.946	1.618	1.046	0.24	0.012	0.828	no	yes	no	no	no	yes	TMEM39B	VII	no	no	C	no	0	0	0	no
chr1	32599020	32599489	3.414	5.41	6.06	2.693	1.585	1.775	0.789	0.033	0.329	0.199	yes	no	no	no	no	no	None	IV	no	no	I	no	0	0	0	no
chr1	32804987	32805822	8.29	8.27	6.455	5.217	0.998	0.779	0.629	0.782	0.154	0.003	no	no	yes	no	no	no	None	II	no	no	G	no	0	0	0	no
chr1	32866316	32866748	5.732	6.309	7.764	6.273	1.101	1.355	1.094	0.003	0.075	0.457	yes	no	no	no	no	no	None	II	no	no	F	no	0	0	0	yes
chr1	33004697	33005843	3.399	6.312	5.552	2.365	1.857	1.633	0.696	0.029	0.429	0.275	yes	no	no	no	no	yes	ZBTB8A	IV	no	no	I	no	0	0	0	no
chr1	33160273	33161490	6.187	10.622	9.687	6.705	1.717	1.566	1.084	0.033	0.859	0.675	yes	no	no	no	no	no	None	IX	no	no	I	no	0	0	0	no
chr1	33352046	33352474	5.882	9.088	5.421	5.096	1.545	0.922	0.866	0.181	0.079	0.009	no	no	yes	no	no	yes	HPCA	II	no	yes	I	yes	7.44598	11.2533	1.51133	no
chr1	33429234	33431326	8.409	14.228	13.333	8.499	1.692	1.585	1.011	0.149	0.004	0.321	no	yes	no	no	no	yes	RNF19B	VII	no	no	I	no	0	0	0	no
chr1	33497783	33498426	6.084	6.202	7.8	6.411	1.019	1.282	1.054	0.53	0.001	0.041	no	yes	yes	no	no	no	None	II	no	no	F	no	0	0	0	no
chr1	33592777	33593414	5.183	7.363	6.653	6.558	1.421	1.284	1.265	0.02	0.245	0.924	yes	no	no	no	no	no	None	II	no	no	H	yes	2.75741	15.3993	5.58469	yes
chr1	33760995	33761459	4.97	8.713	8.194	1.677	1.753	1.649	0.337	0.017	0.717	0.215	yes	no	no	no	no	no	None	II	no	no	I	yes	7.05351	7.17266	1.01689	yes
chr1	33899219	33899906	3.048	4.025	6.505	4.396	1.32	2.134	1.442	0.61	0.018	0.867	no	yes	no	no	no	no	None	V	no	no	H	no	0	0	0	no
chr1	33937863	33938363	3.046	5.239	5.793	2.708	1.72	1.902	0.889	0.1	0.026	0.795	no	yes	no	no	no	yes	ZSCAN20	IV	no	no	C	no	0	0	0	no
chr1	35449492	35451254	6.005	12.402	10.705	5.693	2.065	1.783	0.948	0.148	0.003	0.839	no	yes	no	no	no	yes	ZMYM6NB	IX	no	no	C	no	0	0	0	no
chr1	35657479	35659091	5.646	8.904	8.171	6.534	1.577	1.447	1.157	0.105	0.038	0.933	no	yes	no	no	no	yes	SFPQ	IX	no	no	I	no	0	0	0	no
chr1	36022134	36024466	7.84	9.986	10.873	5.731	1.274	1.387	0.731	0.231	0.02	0.092	no	yes	no	no	no	yes	KIAA0319L	IX	no	no	I	no	0	0	0	no
chr1	36588342	36589600	6.893	7.957	11.573	8.597	1.154	1.679	1.247	0.192	0.018	0.146	no	yes	no	no	no	no	None	I	no	no	H	no	0	0	0	no
chr1	36713810	36714306	3.88	8.753	10.095	7.293	2.256	2.602	1.88	0.007	0.186	0.532	yes	no	no	no	no	no	None	IX	no	no	E	no	0	0	0	no
chr1	36951093	36952996	5.666	6.091	9.425	8.036	1.075	1.663	1.418	0.001	0.023	0.735	yes	yes	no	no	no	no	None	II	no	yes	H	no	0	0	0	no
chr1	37019475	37019739	1.641	7.459	4.692	1.606	4.545	2.859	0.978	0.042	0.165	0.423	yes	no	no	no	no	no	None	IV	no	no	D	yes	5.26888	4.14596	0.786877	yes
chr1	37951056	37953322	4.258	3.004	4.51	3.14	0.705	1.059	0.737	0.225	0.245	0.013	no	no	yes	no	no	no	None	VIII	no	no	G	yes	6.87135	5.86482	0.853518	no
chr1	37974841	37975182	4.121	3.91	2.955	2.33	0.949	0.717	0.566	0.733	0.137	0.008	no	no	yes	no	no	no	None	VIII	no	no	G	no	0	0	0	no
chr1	38019308	38020125	5.738	8.242	10.231	7.358	1.436	1.783	1.282	0.076	0.047	0.002	no	yes	yes	no	no	yes	SNIP1	IX	no	no	H	no	0	0	0	no
chr1	38068786	38069151	3.476	5.284	6.723	2.643	1.52	1.934	0.76	0.495	0.026	0.185	no	yes	no	no	no	no	None	IV	no	no	I	yes	2.74188	5.77301	2.10549	yes
chr1	38074140	38075060	5.388	5.072	4.072	3.106	0.941	0.756	0.576	0.123	0.014	0.078	no	yes	no	no	no	no	None	V	no	no	G	no	0	0	0	no
chr1	38310892	38312964	4.566	3.994	5.351	5.247	0.875	1.172	1.149	0.234	0.006	0.16	no	yes	no	no	no	no	None	V	no	no	F	no	0	0	0	no
chr1	38396979	38397735	12.142	20.842	16.046	12.05	1.716	1.321	0.992	0.029	0.75	0.59	yes	no	no	no	no	no	None	VI	no	no	I	no	0	0	0	no
chr1	38492306	38492958	4.356	2.92	6.595	2.814	0.67	1.514	0.646	0.17	0.006	0.043	no	yes	yes	no	no	no	None	V	no	no	G	yes	2.99017	5.33052	1.78268	yes
chr1	38512256	38513260	5.963	9.775	8.782	6.84	1.639	1.473	1.147	0.206	0.049	0.291	no	yes	no	no	no	yes	POU3F1	IX	no	no	I	no	0	0	0	no
chr1	39281405	39282293	6.609	10.157	12.577	9.28	1.537	1.903	1.404	0.063	0.006	0.014	no	yes	yes	no	no	no	None	I	yes	yes	H	no	0	0	0	no
chr1	39333439	39334093	4.008	3.885	4.966	4.008	0.969	1.239	1	0.888	0.021	0.101	no	yes	no	no	no	no	None	V	no	no	F	no	0	0	0	no
chr1	39337889	39339443	11.411	17.026	15.631	8.714	1.492	1.37	0.764	0.149	0.008	0.169	no	yes	no	no	no	yes	MYCBP	VI	no	no	I	no	0	0	0	no
chr1	39568229	39569060	4.926	3.935	7.302	3.691	0.799	1.482	0.749	0.47	0.232	0.001	no	no	yes	no	no	no	None	V	no	no	F	no	0	0	0	no
chr1	39657276	39658489	2.903	6.212	4.482	2.6	2.14	1.544	0.896	0.021	0.531	0.563	yes	no	no	no	no	no	None	IV	no	no	C	no	0	0	0	no
chr1	39696426	39696943	6.354	7.532	11.806	11.168	1.185	1.858	1.758	0.992	0.057	0.021	no	no	yes	no	no	no	None	I	no	yes	H	no	0	0	0	no
chr1	39873454	39875971	8.753	8.466	8.666	6.222	0.967	0.99	0.711	0.336	0.961	0.017	no	no	yes	no	yes	yes	KIAA0754	IX	no	no	G	no	0	0	0	no
chr1	39956621	39957716	14.906	32.261	29.45	16.476	2.164	1.976	1.105	0.196	0.033	0.766	no	yes	no	no	yes	yes	BMP8A	III	no	no	C	no	0	0	0	no
chr1	39959571	39961025	3.339	3.933	4.634	2.361	1.178	1.388	0.707	0.019	0.003	0.299	yes	yes	no	no	yes	no	None	VIII	no	no	F	no	0	0	0	no
chr1	39989761	40008182	6.481	8.779	9.237	7.939	1.355	1.425	1.225	0.154	0.039	0.238	no	yes	no	no	yes	no	None	IX	yes	no	H	no	0	0	0	no
chr1	40022177	40023196	4.818	5.078	4.95	5.41	1.054	1.027	1.123	0.027	0.56	0.503	yes	no	no	no	yes	no	None	V	no	no	F	no	0	0	0	no
chr1	40053058	40054525	4.883	5.401	4.674	4.621	1.106	0.957	0.946	0.213	0.671	0.015	no	no	yes	no	yes	no	None	V	no	yes	F	no	0	0	0	no
chr1	40102142	40107568	13.05	10.709	18.278	11.389	0.821	1.401	0.873	0.629	0.029	0.162	no	yes	no	no	yes	yes	HEYL	VI	no	no	F	yes	3.01992	8.28704	2.74413	no
chr1	40108027	40120647	4.772	5.453	5.894	4.951	1.143	1.235	1.037	0.272	0.018	0.491	no	yes	no	no	yes	no	None	V	no	no	F	yes	2.256	5.52699	2.44991	no
chr1	40251065	40253448	4.351	4.975	4.93	3.714	1.143	1.133	0.853	0.047	0.236	0.032	yes	no	yes	no	yes	no	None	V	no	no	F	no	0	0	0	no
chr1	40253844	40262299	11.002	19.275	16.892	12.572	1.752	1.535	1.143	0.035	0.688	0.571	yes	no	no	no	yes	yes	BMP8B	VI	no	no	I	no	0	0	0	no
chr1	40327627	40334890	6.883	7.448	8.615	7.458	1.082	1.252	1.083	0.35	0.013	0.023	no	yes	yes	no	yes	no	None	IX	no	no	F	no	0	0	0	no
chr1	40379644	40428513	21.193	25.954	25.582	17.666	1.225	1.207	0.834	0.051	0.089	0.02	no	no	yes	no	no	yes	MFSD2A	III	yes	no	F	yes	3.06263	2.76323	0.902241	no
chr1	40474103	40487874	6.419	8.409	8.661	7.55	1.31	1.349	1.176	0.038	0.029	0.666	yes	yes	no	no	no	no	None	IX	no	no	H	no	0	0	0	no
chr1	40488222	40632162	11.86	11.024	11.414	11.435	0.929	0.962	0.964	0.996	0.025	0.883	no	yes	no	no	no	yes	CAP1	I	yes	no	F	yes	4.11857	8.05412	1.95556	no
chr1	40632589	40825779	9.572	9.819	10.567	9.465	1.026	1.104	0.989	0.161	0.049	0.421	no	yes	no	no	no	yes	TMCO2	I	yes	no	F	yes	6.98705	3.68565	0.527497	no
chr1	40853772	40921430	14.991	11.474	13.972	11.753	0.765	0.932	0.784	0.185	0.058	0.037	no	no	yes	no	no	yes	SMAP2	VI	yes	no	G	yes	3.11078	7.26398	2.3351	no
chr1	41002765	41023798	12.001	10.62	13.73	10.919	0.885	1.144	0.91	0.732	0.589	0.012	no	no	yes	no	no	no	None	I	no	no	F	no	0	0	0	no
chr1	41374983	41375749	4.619	4.407	8.01	6.27	0.954	1.734	1.357	0.791	0.04	0.462	no	yes	no	no	no	no	None	II	no	no	H	no	0	0	0	no
chr1	41419641	41423381	4.309	4.103	4.032	3.691	0.952	0.936	0.856	0.87	0.256	0.042	no	no	yes	no	no	no	None	V	no	no	F	no	0	0	0	no
chr1	41427895	41428621	4.592	2.789	3.974	4.515	0.607	0.866	0.983	0.146	0.142	0.049	no	no	yes	no	no	no	None	V	no	no	G	no	0	0	0	no
chr1	41430198	41436860	4.343	4.715	4.86	4.081	1.085	1.119	0.94	0.192	0.024	0.112	no	yes	no	no	no	no	None	V	no	no	F	no	0	0	0	no
chr1	41540776	41547990	3.897	4.375	4.394	3.792	1.123	1.127	0.973	0.097	0.01	0.758	no	yes	no	no	no	no	None	V	no	no	F	no	0	0	0	no
chr1	41566521	41567652	2.553	2.153	1.381	3.537	0.843	0.541	1.386	0.799	0.892	0.024	no	no	yes	no	no	no	None	VIII	no	no	G	no	0	0	0	no
chr1	41607164	41614434	3.523	3.753	4.45	3.201	1.065	1.263	0.909	0.011	0.05	0.261	yes	no	no	no	no	no	None	VIII	no	no	F	no	0	0	0	no
chr1	41622539	41642002	4.213	4.159	3.86	3.694	0.987	0.916	0.877	0.968	0.172	0.011	no	no	yes	no	no	yes	SCMH1	V	no	no	F	no	0	0	0	no
chr1	41677769	41694713	4.074	3.87	4.28	3.654	0.95	1.051	0.897	0.102	0.15	0.032	no	no	yes	no	no	no	None	V	no	no	F	no	0	0	0	no
chr1	41695395	41701015	4.523	4.473	5.061	4.705	0.989	1.119	1.04	0.168	0	0.548	no	yes	no	no	no	no	None	V	no	no	F	no	0	0	0	no
chr1	41730898	41732808	3.5	4.453	4.645	4	1.272	1.327	1.143	0.011	0.479	0.465	yes	no	no	no	no	no	None	V	no	no	F	no	0	0	0	no
chr1	41759633	41761489	4.093	3.778	4.212	4.174	0.923	1.029	1.02	0.044	0.434	0.777	yes	no	no	no	no	no	None	V	no	no	F	no	0	0	0	no
chr1	41877786	41891521	4.327	5.297	5.085	4.481	1.224	1.175	1.036	0.198	0.001	0.193	no	yes	no	no	no	no	None	V	no	no	F	no	0	0	0	no
chr1	41924471	41927027	3.632	4.355	3.896	3.774	1.199	1.073	1.039	0.06	0.037	0.904	no	yes	no	no	no	no	None	V	no	no	F	no	0	0	0	no
chr1	41927325	41928685	2.414	4.65	5.13	4.016	1.926	2.125	1.663	0.015	0.096	0.647	yes	no	no	no	no	no	None	V	no	no	E	no	0	0	0	no
chr1	42011390	42014341	9.414	11.232	14.831	7.822	1.193	1.575	0.831	0.161	0.027	0.35	no	yes	no	no	no	no	None	VII	no	no	I	no	0	0	0	no
chr1	42248574	42259139	4.297	4.928	4.6	4.138	1.147	1.071	0.963	0.049	0.415	0.387	yes	no	no	no	yes	no	None	V	no	no	F	no	0	0	0	no
chr1	42391548	42395909	3.441	3.467	3.707	3.76	1.008	1.077	1.093	0.373	0.048	0.03	no	yes	yes	no	yes	no	None	VIII	no	no	F	no	0	0	0	no
chr1	42468992	42470921	3.805	3.983	5.036	4.655	1.047	1.323	1.223	0.409	0.049	0.216	no	yes	no	no	yes	no	None	V	no	no	F	no	0	0	0	no
chr1	42518815	42519170	4.313	3.445	3.865	3.933	0.799	0.896	0.912	0.038	0.003	0.875	yes	yes	no	no	yes	no	None	V	no	no	G	no	0	0	0	no
chr1	42520726	42522860	3.98	3.692	3.855	4.191	0.928	0.969	1.053	0.004	0.103	0.563	yes	no	no	no	yes	no	None	V	no	no	F	no	0	0	0	no
chr1	42533059	42543357	3.918	3.486	4.087	3.552	0.89	1.043	0.907	0.081	0.627	0.009	no	no	yes	no	yes	no	None	VIII	no	no	F	no	0	0	0	no
chr1	42615281	42632395	4.383	5.475	7.348	6.102	1.249	1.676	1.392	0.21	0.029	0.399	no	yes	no	no	yes	yes	GUCA2B	II	yes	no	H	no	0	0	0	no
chr1	42647908	42650991	4.133	4.011	4.832	3.992	0.971	1.169	0.966	0.663	0.017	0.347	no	yes	no	no	yes	no	None	V	no	no	F	no	0	0	0	no
chr1	42651612	42652568	4.15	4.252	4.412	4.316	1.025	1.063	1.04	0.5	0.532	0.03	no	no	yes	no	yes	no	None	V	no	no	F	no	0	0	0	no
chr1	42692757	42696702	3.201	3.173	3.599	3.664	0.991	1.124	1.145	0.17	0.499	0.037	no	no	yes	no	yes	no	None	VIII	no	no	F	no	0	0	0	no
chr1	42703073	42713936	3.757	4.555	3.958	3.522	1.212	1.054	0.937	0.134	0.105	0.012	no	no	yes	no	yes	no	None	V	no	no	F	no	0	0	0	no
chr1	42790933	42796900	3.831	4.305	4.044	3.932	1.124	1.056	1.027	0.027	0.412	0.042	yes	no	yes	no	yes	no	None	V	no	no	F	no	0	0	0	no
chr1	42807572	42814278	3.882	4.541	4.386	3.663	1.17	1.13	0.944	0.03	0.426	0.514	yes	no	no	no	yes	no	None	V	no	no	F	yes	2.72168	4.62968	1.70104	no
chr1	42894701	42903473	4.333	4.695	4.961	4.428	1.084	1.145	1.022	0.254	0.035	0.694	no	yes	no	no	yes	no	None	V	no	no	F	no	0	0	0	no
chr1	42961338	42966103	3.755	3.922	3.765	3.607	1.044	1.002	0.961	0.014	0.597	0.22	yes	no	no	no	yes	no	None	VIII	no	no	F	no	0	0	0	no
chr1	43035976	43038324	3.984	4.883	4.613	5.065	1.226	1.158	1.272	0.547	0.238	0.016	no	no	yes	no	yes	no	None	V	no	yes	F	no	0	0	0	no
chr1	43051121	43058287	4.497	4.711	4.813	3.71	1.048	1.07	0.825	0.878	0.001	0.01	no	yes	yes	no	yes	no	None	V	no	no	F	no	0	0	0	no
chr1	43084317	43087001	4.053	5.098	4.804	5.342	1.258	1.185	1.318	0.079	0.031	0.113	no	yes	no	no	yes	no	None	V	no	no	F	no	0	0	0	no
chr1	43101501	43102320	3.622	2.875	2.923	2.502	0.794	0.807	0.691	0.352	0.028	0.308	no	yes	no	no	yes	no	None	VIII	no	no	G	no	0	0	0	no
chr1	43106634	43107643	2.833	3.878	3.111	2.521	1.369	1.098	0.89	0.033	0.415	0.459	yes	no	no	no	yes	no	None	VIII	no	no	F	no	0	0	0	no
chr1	43129492	43137573	3.952	4.303	3.691	3.596	1.089	0.934	0.91	0.024	0.184	0.04	yes	no	yes	no	yes	no	None	V	no	no	F	no	0	0	0	no
chr1	43257680	43259491	3.872	3.919	4.743	3.439	1.012	1.225	0.888	0.507	0.022	0.352	no	yes	no	no	yes	no	None	V	no	no	F	no	0	0	0	no
chr1	43270433	43274332	3.797	3.646	3.681	3.585	0.96	0.969	0.944	0.141	0.163	0.042	no	no	yes	no	yes	no	None	VIII	no	no	F	no	0	0	0	no
chr1	43276090	43279873	4.496	4.29	4.134	3.804	0.954	0.919	0.846	0.744	0.881	0.031	no	no	yes	no	yes	no	None	V	no	no	F	no	0	0	0	no
chr1	43321366	43322118	4.573	2.717	1.116	2.305	0.594	0.244	0.504	0.045	0.034	0.414	yes	yes	no	no	yes	no	None	VIII	no	no	G	no	0	0	0	no
chr1	43350772	43359658	4.131	4.433	4.595	3.872	1.073	1.112	0.937	0.113	0.038	0.606	no	yes	no	no	yes	no	None	V	no	no	F	no	0	0	0	no
chr1	43431017	43433568	6.878	8.561	7.706	4.71	1.245	1.12	0.685	0.669	0.107	0.025	no	no	yes	no	yes	no	None	IX	no	no	F	no	0	0	0	no
chr1	43433826	43435493	4.672	4.249	4.043	3.993	0.909	0.865	0.855	0.043	0.032	0.357	yes	yes	no	no	yes	no	None	V	no	no	G	no	0	0	0	no
chr1	43480756	43485254	4.001	4.152	4.69	3.861	1.038	1.172	0.965	0.236	0.042	0.485	no	yes	no	no	no	no	None	V	no	no	F	no	0	0	0	no
chr1	43492873	43495598	4.394	5.519	6.151	4.558	1.256	1.4	1.037	0.151	0.047	0.84	no	yes	no	no	no	no	None	V	no	no	F	no	0	0	0	no
chr1	43517198	43520116	3.661	3.926	4.359	3.482	1.072	1.191	0.951	0.164	0.01	0.403	no	yes	no	no	no	no	None	V	no	no	F	no	0	0	0	no
chr1	43523866	43526014	4.417	5.324	6.163	4.083	1.205	1.395	0.924	0.325	0.527	0.032	no	no	yes	no	no	no	None	IV	no	no	F	no	0	0	0	no
chr1	43592246	43593613	3.498	3.644	4.229	4.415	1.042	1.209	1.262	0.506	0.008	0	no	yes	yes	no	no	no	None	V	no	no	F	no	0	0	0	no
chr1	43605190	43611316	3.531	3.794	5.006	3.396	1.075	1.418	0.962	0.171	0.022	0.135	no	yes	no	no	no	no	None	V	no	no	F	no	0	0	0	no
chr1	43672488	43673614	3.651	0.958	3.814	2.262	0.262	1.045	0.619	0.001	0.232	0.241	yes	no	no	no	no	no	None	VIII	no	no	G	no	0	0	0	no
chr1	43692957	43693728	5.597	6.286	8.254	5.732	1.123	1.475	1.024	0.106	0.003	0.561	no	yes	no	no	no	no	None	II	no	no	F	yes	5.08967	8.96972	1.76234	no
chr1	43703685	43704475	3.463	5.331	5.084	4.8	1.54	1.468	1.386	0.184	0.041	0.255	no	yes	no	no	no	no	None	V	no	no	H	yes	4.22143	8.82706	2.09101	yes
chr1	43778404	43784113	4.957	5.067	5.209	3.774	1.022	1.051	0.761	0.356	0.471	0.042	no	no	yes	no	no	no	None	V	no	yes	F	no	0	0	0	no
chr1	43784530	43786254	4.878	5.682	6.465	5.433	1.165	1.325	1.114	0.022	0.008	0.281	yes	yes	no	no	no	no	None	II	no	no	F	no	0	0	0	no
chr1	43799850	43806727	3.786	4.237	4.243	3.892	1.119	1.121	1.028	0.169	0.028	0.814	no	yes	no	no	no	yes	MPL	V	no	no	F	no	0	0	0	no
chr1	43853989	43857457	11.91	24.018	21.87	15.585	2.017	1.836	1.309	0.023	0.121	0.986	yes	no	no	no	no	yes	MED8	III	no	no	C	no	0	0	0	no
chr1	43867394	43873519	3.876	4.321	4.424	4.159	1.115	1.141	1.073	0.093	0.035	0.791	no	yes	no	no	no	no	None	V	no	no	F	no	0	0	0	no
chr1	43955491	43959559	3.573	3.627	3.651	4.04	1.015	1.022	1.131	0.025	0.204	0.166	yes	no	no	no	no	no	None	VIII	no	no	F	no	0	0	0	no
chr1	43970320	43980951	3.773	4.165	4.421	3.73	1.104	1.172	0.988	0.079	0.002	0.448	no	yes	no	no	no	no	None	V	no	no	F	no	0	0	0	no
chr1	44081734	44093280	3.59	4.622	4.634	3.781	1.288	1.291	1.053	0.032	0.021	0.596	yes	yes	no	no	no	no	None	V	no	no	F	no	0	0	0	no
chr1	44099765	44103527	3.868	4.33	3.683	3.851	1.119	0.952	0.996	0.079	0.003	0.551	no	yes	no	no	yes	no	None	V	no	no	F	no	0	0	0	no
chr1	44105611	44107324	3.487	4.037	3.729	2.552	1.158	1.069	0.732	0.036	0.661	0.281	yes	no	no	no	yes	no	None	VIII	no	yes	F	no	0	0	0	no
chr1	44110081	44112346	4.199	5.266	3.829	4.369	1.254	0.912	1.041	0.047	0.244	0.602	yes	no	no	no	yes	no	None	V	no	no	F	no	0	0	0	no
chr1	44113373	44126689	7.768	9.669	8.519	8.395	1.245	1.097	1.081	0.184	0.007	0.259	no	yes	no	no	yes	yes	KDM4A	IX	yes	no	F	yes	3.1172	4.20752	1.34978	no
chr1	44138458	44151917	4.742	4.234	4.613	4.174	0.893	0.973	0.88	0.01	0.879	0.047	yes	no	yes	no	yes	no	None	V	no	no	F	no	0	0	0	no
chr1	44227696	44237048	5.16	4.485	4.504	4.302	0.869	0.873	0.834	0.165	0.036	0.075	no	yes	no	no	yes	no	None	V	no	no	G	no	0	0	0	no
chr1	44411386	44413830	7.46	16.201	14.503	9.534	2.172	1.944	1.278	0.231	0.013	0.776	no	yes	no	no	yes	yes	IPO13	VII	no	no	C	yes	3.52675	5.74529	1.62906	no
chr1	44471192	44471714	4.294	8.34	7.846	6.002	1.942	1.827	1.398	0.023	0.215	0.461	yes	no	no	no	yes	no	None	II	no	no	C	no	0	0	0	yes
chr1	44501528	44502684	3.624	5.668	8.358	3.257	1.564	2.306	0.899	0.031	0.024	0.651	yes	yes	no	no	yes	no	None	IV	no	no	I	yes	2.75741	6.51277	2.36192	no
chr1	44678101	44679634	5.441	6.26	7.148	5.979	1.15	1.314	1.099	0.154	0.033	0.027	no	yes	yes	no	yes	yes	DMAP1	II	no	yes	F	no	0	0	0	no
chr1	44747626	44748511	2.344	1.459	4.053	3.645	0.623	1.729	1.555	0.184	0.047	0.544	no	yes	no	no	yes	no	None	VIII	no	yes	H	no	0	0	0	no
chr1	44819915	44822316	11.616	15.685	12.87	10.683	1.35	1.108	0.92	0.25	0.039	0.103	no	yes	no	no	yes	yes	ERI3	VI	no	no	F	no	0	0	0	no
chr1	44925936	44926551	5.268	7.073	6.018	7.232	1.342	1.142	1.373	0.034	0.161	0.401	yes	no	no	no	yes	no	None	II	no	no	H	no	0	0	0	no
chr1	45065860	45066290	8.864	4.696	6.395	7.293	0.53	0.722	0.823	0.147	0.03	0.151	no	yes	no	no	yes	no	None	II	no	no	G	no	0	0	0	no
chr1	45096332	45098758	6.098	17.301	9.76	8.132	2.837	1.6	1.334	0.19	0.032	0.105	no	yes	no	no	yes	no	None	VII	no	no	C	no	0	0	0	no
chr1	45149566	45151100	4.181	5.418	5.852	4.429	1.296	1.4	1.059	0.008	0.115	0.906	yes	no	no	no	yes	no	None	V	no	no	F	no	0	0	0	no
chr1	45162389	45163016	8.127	13.029	11.263	8.607	1.603	1.386	1.059	0.114	0.021	0.783	no	yes	no	no	yes	no	None	VII	no	no	I	no	0	0	0	no
chr1	45180298	45181261	3.626	5.327	6.885	5.158	1.469	1.899	1.423	0.024	0.052	0.315	yes	no	no	no	yes	no	None	IV	no	no	H	yes	2.94578	8.55014	2.9025	yes
chr1	45240569	45244185	4.547	5.144	5.865	4.965	1.131	1.29	1.092	0.103	0.015	0.025	no	yes	yes	no	yes	yes	RPS8	V	yes	no	F	no	0	0	0	no
chr1	45299453	45299935	3.342	6.498	7.16	5.478	1.944	2.143	1.639	0.011	0.288	0.581	yes	no	no	no	yes	no	None	II	no	no	E	no	0	0	0	no
chr1	45301373	45301891	9.282	11.985	10.425	8.012	1.291	1.123	0.863	0.158	0.609	0.014	no	no	yes	no	yes	no	None	VII	no	no	F	no	0	0	0	yes
chr1	45480006	45480608	4.02	5.215	3.832	3.527	1.297	0.953	0.877	0.992	0.695	0.042	no	no	yes	no	no	no	None	V	no	no	F	no	0	0	0	yes
chr1	45670470	45672740	9.974	18.363	8.264	8.29	1.841	0.829	0.831	0.14	0.04	0.011	no	yes	yes	no	no	yes	ZSWIM5	VII	no	no	I	no	0	0	0	no
chr1	45768460	45770976	12.663	26.19	16.05	15.741	2.068	1.267	1.243	0.045	0.492	0.123	yes	no	no	no	no	yes	LOC400752	III	no	no	C	yes	6.40304	3.2565	0.508587	no
chr1	45864197	45864785	6.095	7.306	7.244	8.26	1.199	1.189	1.355	0.941	0.179	0.04	no	no	yes	no	no	no	None	II	no	no	F	no	0	0	0	no
chr1	45949136	45949879	6.439	12.13	14.866	7.963	1.884	2.309	1.237	0.019	0.004	0.605	yes	yes	no	no	no	no	None	VII	no	no	C	yes	4.40254	4.13987	0.940337	yes
chr1	46008321	46008775	7.096	8.66	12.134	8.206	1.22	1.71	1.156	0.261	0.042	0.695	no	yes	no	no	no	no	None	I	no	no	H	no	0	0	0	no
chr1	46231678	46232011	3.769	7.392	4.837	4.029	1.961	1.283	1.069	0.017	0.212	0.363	yes	no	no	no	no	no	None	IV	no	no	I	no	0	0	0	no
chr1	46268436	46268707	4.741	9.865	8.782	4.307	2.081	1.852	0.908	0.035	0.11	0.407	yes	no	no	no	no	no	None	IX	no	no	C	no	0	0	0	no
chr1	46467631	46469681	4.831	6.874	7.281	6.194	1.423	1.507	1.282	0.041	0.055	0.091	yes	no	no	no	no	no	None	II	yes	no	H	no	0	0	0	no
chr1	46508637	46509816	9.313	9.817	12.241	9.894	1.054	1.314	1.062	0.419	0.013	0.251	no	yes	no	no	no	no	None	I	no	no	F	no	0	0	0	no
chr1	46751363	46752261	3.856	8.68	7.487	4.012	2.251	1.942	1.04	0.01	0.186	0.218	yes	no	no	no	no	no	None	IV	no	no	C	no	0	0	0	yes
chr1	46866896	46868336	4.821	6.09	7.911	5.838	1.263	1.641	1.211	0.258	0.012	0.802	no	yes	no	no	no	no	None	II	no	no	H	no	0	0	0	no
chr1	46911692	46913101	9.362	8.69	11.896	7.364	0.928	1.271	0.787	0.947	0.285	0.034	no	no	yes	no	no	no	None	I	no	no	F	no	0	0	0	no
chr1	47022024	47023432	3.435	2.701	2.663	1.153	0.786	0.775	0.336	0.477	0.713	0.003	no	no	yes	no	no	no	None	VIII	no	no	G	no	0	0	0	no
chr1	47047268	47049669	6.964	5.233	7.535	5.897	0.752	1.082	0.847	0.015	0.222	0.062	yes	no	no	no	no	no	None	II	no	no	G	no	0	0	0	no
chr1	47079034	47079858	9.642	15.83	18.471	16.232	1.642	1.916	1.683	0.348	0.049	0.443	no	yes	no	no	no	no	None	VI	no	no	E	no	0	0	0	no
chr1	47165267	47165761	4.758	5.804	4.034	4.261	1.22	0.848	0.896	0.641	0.041	0.155	no	yes	no	no	no	no	None	V	no	no	F	no	0	0	0	no
chr1	47183224	47185833	9.147	10.476	9.573	11.646	1.145	1.047	1.273	0.444	0.325	0.029	no	no	yes	no	no	yes	EFCAB14	I	no	no	F	no	0	0	0	no
chr1	47778963	47780685	8.497	7.187	7.961	7.295	0.846	0.937	0.859	0.024	0.371	0.216	yes	no	no	no	no	yes	STIL	II	no	no	G	no	0	0	0	no
chr1	47788949	47790638	3.813	2.769	2.424	3.012	0.726	0.636	0.79	0.215	0.153	0.009	no	no	yes	no	no	no	None	VIII	no	no	G	no	0	0	0	no
chr1	47881677	47883074	2.656	6.188	4.491	2.462	2.33	1.691	0.927	0.031	0.635	0.305	yes	no	no	no	no	yes	FOXE3	IV	no	no	C	no	0	0	0	no
chr1	47973520	47974988	3.958	5.318	4.789	1.696	1.343	1.21	0.429	0.223	0.736	0.001	no	no	yes	no	no	no	None	IV	no	yes	F	no	0	0	0	no
chr1	48191817	48192266	7.818	10.716	13.997	5.397	1.371	1.79	0.69	0.118	0.03	0.495	no	yes	no	no	no	no	None	I	no	no	H	yes	3.72306	7.94435	2.13382	yes
chr1	49123102	49124286	4.866	2.538	1.094	0.948	0.521	0.225	0.195	0.255	0.052	0.012	no	no	yes	no	no	no	None	VIII	no	no	G	yes	3.81385	3.84603	1.00844	no
chr1	49255306	49256642	5.53	5.119	5.123	5.114	0.926	0.926	0.925	0.85	0.045	0.022	no	yes	yes	no	no	no	None	V	no	no	F	no	0	0	0	no
chr1	50737668	50738007	4.37	7.501	6.665	3.602	1.717	1.525	0.824	0.025	0.104	0.524	yes	no	no	no	no	no	None	IV	no	no	I	yes	3.10209	8.82706	2.84552	no
chr1	50774519	50774914	3.718	5.909	7.268	1.657	1.589	1.955	0.446	0.142	0.148	0.014	no	no	yes	no	no	no	None	IV	no	no	I	no	0	0	0	no
chr1	51199125	51199505	4.154	2.533	1.609	3.707	0.61	0.387	0.893	0.142	0.23	0.031	no	no	yes	no	no	no	None	VIII	no	yes	G	no	0	0	0	no
chr1	51415025	51416637	3.846	3.548	3.754	1.513	0.923	0.976	0.394	0.424	0.578	0.016	no	no	yes	no	no	no	None	VIII	no	no	G	no	0	0	0	no
chr1	51442148	51446062	4.219	4.546	7.187	4.838	1.077	1.703	1.147	0.153	0.013	0.701	no	yes	no	no	no	no	None	V	no	no	H	no	0	0	0	no
chr1	52014684	52015136	5.748	7.409	10.926	9.47	1.289	1.901	1.647	0.723	0.037	0.102	no	yes	no	yes	no	no	None	I	no	no	H	no	0	0	0	no
chr1	52073213	52073791	2.631	2.51	5.974	6.529	0.954	2.27	2.481	0.664	0.305	0.022	no	no	yes	yes	no	no	None	V	no	yes	E	no	0	0	0	no
chr1	52082527	52083698	10.105	23.29	21.527	9.738	2.305	2.13	0.964	0.156	0.043	0.606	no	yes	no	yes	no	yes	OSBPL9	III	no	no	C	no	0	0	0	no
chr1	52088119	52088592	5.723	1.875	4.214	1.58	0.328	0.736	0.276	0.024	0.331	0.024	yes	no	yes	yes	no	no	None	VIII	no	no	G	no	0	0	0	no
chr1	52113876	52114414	5.674	5.816	7.287	6.369	1.025	1.284	1.122	0.158	0.22	0.047	no	no	yes	yes	no	no	None	II	no	no	F	no	0	0	0	no
chr1	52493792	52495322	4.057	4.916	1.39	2.934	1.211	0.343	0.723	0.006	0.004	0.04	yes	yes	yes	yes	no	no	None	VIII	no	no	G	no	0	0	0	no
chr1	53010138	53011491	4.298	4.318	8.746	3.296	1.005	2.035	0.767	0.933	0.049	0.611	no	yes	no	no	no	no	None	V	no	no	F	no	0	0	0	no
chr1	53140475	53141290	3.958	6.15	5.811	3.282	1.554	1.468	0.829	0.174	0.005	0.755	no	yes	no	no	no	no	None	IV	no	no	I	no	0	0	0	no
chr1	53151803	53152240	7.629	9.235	11.622	9.818	1.21	1.523	1.287	0.05	0.08	0.514	yes	no	no	no	no	no	None	I	no	yes	H	yes	2.41273	5.9257	2.45601	yes
chr1	53172627	53173297	3.823	4.776	7.061	5.06	1.249	1.847	1.324	0.027	0.293	0.533	yes	no	no	no	no	no	None	V	no	no	H	no	0	0	0	no
chr1	53260856	53261577	6.626	5.528	8.153	8.894	0.834	1.231	1.342	0.352	0.628	0.034	no	no	yes	no	no	no	None	II	no	yes	F	no	0	0	0	no
chr1	53647545	53648354	8.598	9.195	7.638	10.338	1.069	0.888	1.202	0.029	0.237	0.563	yes	no	no	no	no	no	None	I	no	no	F	no	0	0	0	yes
chr1	53661408	53663955	10.617	10.987	17.026	12.079	1.035	1.604	1.138	0.798	0.226	0.046	no	no	yes	no	no	yes	CPT2	VI	no	no	H	no	0	0	0	no
chr1	53685291	53687232	9.78	21.679	16.194	12.705	2.217	1.656	1.299	0.21	0.045	0.394	no	yes	no	no	no	yes	C1orf123	VI	no	no	C	no	0	0	0	no
chr1	53796168	53797386	7.56	9.695	8.622	5.577	1.282	1.141	0.738	0.037	0.576	0.209	yes	no	no	no	no	no	None	IX	no	no	F	no	0	0	0	no
chr1	53813164	53813674	1.369	4.382	6.439	6.421	3.2	4.702	4.689	0.315	0.044	0.064	no	yes	no	no	no	no	None	V	no	yes	A	no	0	0	0	no
chr1	54203193	54205539	19.187	26.946	16.183	15.791	1.404	0.843	0.823	0.27	0.038	0.647	no	yes	no	no	no	no	None	III	no	no	I	no	0	0	0	no
chr1	54446894	54448856	9.116	9.621	8.937	6.981	1.055	0.98	0.766	0.749	0.839	0.041	no	no	yes	no	no	no	None	IX	no	no	F	no	0	0	0	no
chr1	54589488	54592442	3.755	5.696	4.637	3.319	1.517	1.235	0.884	0.167	0.027	0.04	no	yes	yes	no	no	no	None	IV	no	no	I	yes	5.29013	4.13987	0.782565	no
chr1	54747291	54750092	3.589	4.073	5.211	3.888	1.135	1.452	1.083	0.058	0.022	0.419	no	yes	no	no	no	no	None	V	no	no	F	no	0	0	0	no
chr1	54752493	54754505	4.135	5.954	5.012	3.891	1.44	1.212	0.941	0.024	0.042	0.317	yes	yes	no	no	no	no	None	IV	no	no	F	no	0	0	0	no
chr1	54796293	54797718	4.044	4.877	6.543	4.565	1.206	1.618	1.129	0.218	0.01	0.077	no	yes	no	no	no	no	None	V	no	no	H	no	0	0	0	no
chr1	54815812	54817031	4.117	5.5	4.662	5.074	1.336	1.133	1.233	0.016	0.352	0.591	yes	no	no	no	no	no	None	V	no	no	F	no	0	0	0	no
chr1	54950928	54951561	3.611	6.79	7.016	4.108	1.88	1.943	1.138	0.046	0.22	0.27	yes	no	no	no	no	no	None	IV	no	no	C	no	0	0	0	no
chr1	54962986	54963469	5.067	4.765	8.491	5.801	0.94	1.676	1.145	0.56	0.002	0.713	no	yes	no	no	no	no	None	II	no	no	H	no	0	0	0	no
chr1	55033326	55034369	7.79	6.833	9.755	8.759	0.877	1.252	1.124	0.162	0.017	0.397	no	yes	no	no	no	no	None	IX	no	no	F	no	0	0	0	no
chr1	55275807	55276477	3.753	6.12	5.675	4.323	1.631	1.512	1.152	0.036	0.724	0.901	yes	no	no	no	no	no	None	IV	no	yes	I	yes	4.40254	12.4379	2.82516	no
chr1	55431262	55432195	6.639	7.176	10.527	7.275	1.081	1.586	1.096	0.556	0.039	0.332	no	yes	no	no	no	no	None	IX	no	no	F	no	0	0	0	no
chr1	56890443	56891381	5.651	7.092	7.991	6.311	1.255	1.414	1.117	0.017	0.006	0.187	yes	yes	no	no	no	no	None	II	no	no	F	no	0	0	0	no
chr1	59361896	59363344	3.573	5.554	6.615	3.169	1.555	1.851	0.887	0.186	0.029	0.214	no	yes	no	no	no	no	None	IV	no	no	I	no	0	0	0	no
chr1	59364630	59365913	4.554	3.573	7.351	5.901	0.785	1.614	1.296	0.458	0.032	0.769	no	yes	no	no	no	no	None	II	no	no	H	no	0	0	0	no
chr1	59385363	59386108	4.7	2.72	5.175	5.084	0.579	1.101	1.082	0.037	0.798	0.337	yes	no	no	no	no	no	None	V	no	no	F	no	0	0	0	no
chr1	60437061	60437463	2.943	6.226	6.31	3.188	2.115	2.144	1.083	0.007	0.299	0.678	yes	no	no	no	no	no	None	IV	no	no	C	yes	3.69376	8.8842	2.40519	yes
chr1	61542678	61543229	4.041	6.175	7.066	3.433	1.528	1.748	0.849	0.039	0.06	0.083	yes	no	no	yes	no	yes	NFIA	IV	no	no	I	no	0	0	0	no
chr1	61623237	61623691	1.856	4.561	5.485	5.374	2.458	2.956	2.896	0.259	0.009	0.02	no	yes	yes	yes	no	no	None	V	no	no	B	no	0	0	0	no
chr1	62107298	62107722	4.363	8.52	9.882	3.563	1.953	2.265	0.817	0.023	0.042	0.272	yes	yes	no	no	no	no	None	IX	no	no	C	yes	4.70234	3.1217	0.663861	no
chr1	62737600	62738281	5.99	9.088	6.847	5.363	1.517	1.143	0.895	0.195	0.036	0.055	no	yes	no	no	no	no	None	II	no	no	I	no	0	0	0	no
chr1	62901053	62903691	6.116	8.295	6.444	6.584	1.356	1.053	1.077	0	0.1	0.527	yes	no	no	no	no	yes	USP1	II	yes	no	F	no	0	0	0	no
chr1	63181984	63182500	1.374	4.538	6.908	5.997	3.302	5.026	4.364	0.236	0.039	0.148	no	yes	no	no	no	no	None	V	no	yes	A	no	0	0	0	no
chr1	63581681	63582146	4.328	1.812	1.455	4.827	0.419	0.336	1.115	0.025	0.263	0.484	yes	no	no	no	no	no	None	V	no	no	G	no	0	0	0	no
chr1	63787673	63789923	2.623	6.245	6.997	3.703	2.381	2.668	1.412	0.037	0.034	0.232	yes	yes	no	no	no	yes	FOXD3	IV	no	no	E	no	0	0	0	no
chr1	64935646	64937135	2.589	6.995	8.017	3.306	2.701	3.096	1.277	0.014	0.16	0.682	yes	no	no	no	no	yes	CACHD1	IV	no	no	C	yes	2.62805	4.43111	1.68608	no
chr1	65719769	65720962	8.338	12.048	10.681	8.015	1.445	1.281	0.961	0.202	0.028	0.158	no	yes	no	no	no	no	None	I	no	no	F	no	0	0	0	no
chr1	65774981	65775764	4.921	6.793	6.93	4.119	1.381	1.408	0.837	0.164	0.036	0.186	no	yes	no	no	no	yes	DNAJC6	II	no	no	I	no	0	0	0	no
chr1	66796428	66798136	4.185	2.87	2.482	1.179	0.686	0.593	0.282	0.769	0.432	0.016	no	no	yes	yes	no	yes	PDE4B	VIII	no	no	G	no	0	0	0	no
chr1	66858968	66859942	6.13	6.212	9.413	6.111	1.013	1.536	0.997	0.923	0.006	0.987	no	yes	no	yes	no	no	None	II	no	no	F	no	0	0	0	no
chr1	67394819	67396698	10.709	14.743	17.252	8.048	1.377	1.611	0.752	0.234	0.028	0.049	no	yes	yes	no	no	yes	MIER1	VI	no	yes	I	no	0	0	0	no
chr1	67461628	67462104	5.03	6.038	6.567	7.634	1.2	1.306	1.518	0.081	0.1	0.012	no	no	yes	no	no	no	None	II	no	no	F	yes	3.52675	7.06165	2.00231	yes
chr1	67465745	67466131	3.345	5.283	7.45	4.213	1.58	2.227	1.26	0.368	0.048	0.69	no	yes	no	no	no	no	None	IV	no	no	H	no	0	0	0	no
chr1	70032745	70033368	3.367	7.849	5.372	2.849	2.331	1.596	0.846	0.04	0.833	0.399	yes	no	no	no	no	no	None	IV	no	no	C	no	0	0	0	no
chr1	70876272	70877004	6.738	12.777	9.402	6.254	1.896	1.395	0.928	0.041	0.621	0.823	yes	no	no	no	no	yes	CTH	IX	no	no	I	no	0	0	0	no
chr1	71286115	71286519	3.649	1.369	1.717	4.117	0.375	0.47	1.128	0.005	0.404	0.172	yes	no	no	no	no	no	None	VIII	no	no	G	no	0	0	0	no
chr1	71545940	71547264	6.482	8.556	9.966	6.523	1.32	1.538	1.006	0.207	0.014	0.242	no	yes	no	no	no	yes	ZRANB2	IX	no	no	H	yes	3.52675	3.79488	1.07603	no
chr1	76081252	76082887	4.073	4.606	3.942	1.12	1.131	0.968	0.275	0.499	0.515	0.024	no	no	yes	yes	no	no	None	VIII	no	no	G	no	0	0	0	no
chr1	76210885	76211442	3.396	1.311	5.763	1.283	0.386	1.697	0.378	0.185	0.004	0.553	no	yes	no	yes	no	no	None	VIII	no	no	G	no	0	0	0	no
chr1	77333163	77334920	1.093	3.444	4.948	2.582	3.149	4.525	2.361	0.251	0.038	0.399	no	yes	no	yes	no	yes	ST6GALNAC5	VIII	no	no	D	no	0	0	0	no
chr1	77745567	77746016	6.542	5.732	3.088	5.254	0.876	0.472	0.803	0.601	0.007	0.841	no	yes	no	no	no	no	None	V	no	no	G	no	0	0	0	no
chr1	77747368	77748765	3.78	6.687	6.231	4.117	1.769	1.648	1.089	0.007	0.384	0.844	yes	no	no	no	no	yes	AK5	IV	no	no	I	no	0	0	0	no
chr1	77877855	77880206	5.791	8.179	8.474	8.195	1.412	1.463	1.415	0.021	0.016	0.486	yes	yes	no	no	no	no	None	IX	no	yes	H	no	0	0	0	no
chr1	77999163	78000926	3.595	5.163	4.794	3.161	1.436	1.334	0.879	0.193	0.217	0.036	no	no	yes	no	no	no	None	IV	no	no	I	yes	3.52727	4.80261	1.36157	no
chr1	78634063	78634494	1.243	2.579	3.756	3.614	2.076	3.022	2.909	0.225	0.023	0.12	no	yes	no	yes	no	no	None	VIII	no	no	E	no	0	0	0	no
chr1	81674014	81674702	6.988	7.713	9.972	7.535	1.104	1.427	1.078	0.394	0.027	0.422	no	yes	no	no	no	no	None	IX	no	no	F	no	0	0	0	no
chr1	82265602	82269609	3.646	5.417	3.841	3.142	1.486	1.053	0.862	0.048	0.996	0.336	yes	no	no	no	no	yes	LPHN2	IV	no	no	I	no	0	0	0	no
chr1	84284425	84285043	10.068	9.043	11.605	9.358	0.898	1.153	0.929	0.244	0.038	0.466	no	yes	no	no	no	no	None	I	no	no	F	no	0	0	0	no
chr1	84691289	84691669	0.931	3.89	3.604	1.141	4.179	3.872	1.226	0.015	0.129	0.423	yes	no	no	yes	no	no	None	VIII	no	no	D	no	0	0	0	no
chr1	84763904	84765081	7.024	12.755	9.453	5.84	1.816	1.346	0.831	0.199	0.027	0.001	no	yes	yes	yes	no	yes	SAMD13	IX	no	yes	I	no	0	0	0	no
chr1	85219239	85219902	4.418	4.691	5.164	1.335	1.062	1.169	0.302	0.697	0.975	0.019	no	no	yes	yes	no	no	None	V	no	no	F	yes	7.44598	6.5548	0.880314	yes
chr1	85238043	85238314	2.962	7.896	8.234	5.597	2.665	2.779	1.889	0.002	0.042	0.135	yes	yes	no	yes	no	no	None	II	no	no	E	no	0	0	0	yes
chr1	85245236	85246242	7.673	8.215	11.35	7.658	1.071	1.479	0.998	0.488	0.038	0.468	no	yes	no	yes	no	no	None	IX	no	no	F	no	0	0	0	no
chr1	85247956	85249017	3.054	7.458	4.479	2.862	2.442	1.467	0.937	0.044	0.244	0.277	yes	no	no	yes	no	no	None	IV	no	no	I	yes	16.3163	7.68499	0.471	no
chr1	85358280	85359594	2.737	6.31	5.176	2.27	2.305	1.891	0.83	0.031	0.109	0.447	yes	no	no	yes	no	yes	LPAR3	IV	no	no	C	no	0	0	0	no
chr1	86043471	86043927	4.182	3.08	4.954	1.583	0.737	1.185	0.378	0.778	0.044	0.016	no	yes	yes	no	no	yes	DDAH1	VIII	no	no	G	no	0	0	0	no
chr1	86350380	86350697	4.321	1.046	1.278	1.204	0.242	0.296	0.279	0.001	0.141	0.001	yes	no	yes	yes	no	no	None	VIII	no	no	G	no	0	0	0	no
chr1	87239941	87240574	7.505	7.326	9.352	6.951	0.976	1.246	0.926	0.166	0.284	0.035	no	no	yes	no	no	no	None	IX	no	no	F	no	0	0	0	no
chr1	87677642	87678446	4.055	7.434	8	6.698	1.833	1.973	1.652	0.042	0.008	0.124	yes	yes	no	no	no	no	None	II	no	no	E	no	0	0	0	no
chr1	87685310	87685752	5.198	6.124	8.353	6.065	1.178	1.607	1.167	0.537	0.01	0.959	no	yes	no	no	no	no	None	II	no	no	H	no	0	0	0	no
chr1	87770745	87771188	4.105	3.909	5.124	6.077	0.952	1.248	1.48	0.293	0.028	0.018	no	yes	yes	no	no	no	None	V	no	no	F	no	0	0	0	no
chr1	87795939	87796492	2.791	3.367	6.432	4.394	1.206	2.304	1.574	0.016	0.168	0.672	yes	no	no	no	no	no	None	V	no	no	H	no	0	0	0	no
chr1	87799383	87801364	5.435	8.477	6.976	5.981	1.56	1.284	1.101	0.08	0.018	0.89	no	yes	no	no	no	no	None	II	no	no	I	no	0	0	0	no
chr1	88928165	88928868	2.869	6.686	6.671	5.815	2.33	2.325	2.027	0.014	0.453	0.11	yes	no	no	no	no	no	None	II	no	no	E	no	0	0	0	no
chr1	89202345	89202634	3.072	2.875	5.913	3.888	0.936	1.925	1.266	0.438	0.037	0.502	no	yes	no	no	no	no	None	V	no	no	H	yes	7.6902	4.48569	0.5833	yes
chr1	89664089	89664913	4.062	3.02	2.717	1.384	0.743	0.669	0.341	0.609	0.282	0.021	no	no	yes	yes	no	yes	GBP4	VIII	no	no	G	no	0	0	0	no
chr1	90107325	90107799	4.063	1.738	4.605	3.826	0.428	1.133	0.942	0.008	0.097	0.905	yes	no	no	no	no	no	None	V	no	no	F	no	0	0	0	no
chr1	90280998	90281820	8.146	8.217	8.896	9.622	1.009	1.092	1.181	0.348	0.047	0.771	no	yes	no	no	no	no	None	I	no	no	F	no	0	0	0	no
chr1	90308628	90309725	6.202	9.476	11.952	5.036	1.528	1.927	0.812	0.11	0.022	0.471	no	yes	no	no	no	no	None	IX	no	no	I	no	0	0	0	no
chr1	90859793	90860247	3.011	4.946	7.614	4.213	1.643	2.529	1.399	0.034	0.013	0.506	yes	yes	no	no	no	no	None	V	no	no	E	no	0	0	0	no
chr1	91182640	91184663	7.299	17.421	16.801	12.716	2.387	2.302	1.742	0.016	0.018	0.034	yes	yes	yes	no	no	yes	BARHL2	VI	no	no	E	no	0	0	0	no
chr1	91300343	91300997	3.695	2.821	8.991	4.896	0.763	2.433	1.325	0.262	0.02	0.64	no	yes	no	no	yes	no	None	V	no	no	H	no	0	0	0	no
chr1	91316005	91317838	13.098	19.104	12.857	8.839	1.459	0.982	0.675	0.294	0.014	0.127	no	yes	no	no	yes	no	None	VII	no	no	I	yes	3.55387	7.93475	2.23271	no
chr1	91331245	91331696	2.742	6.456	8.58	4.71	2.355	3.129	1.718	0.029	0.003	0.184	yes	yes	no	no	yes	no	None	II	no	no	E	no	0	0	0	no
chr1	91520199	91520785	7.066	7.312	8.941	8.749	1.035	1.265	1.238	0.756	0.002	0.44	no	yes	no	no	yes	no	None	IX	no	no	F	no	0	0	0	no
chr1	91541098	91541651	3.882	2.978	4.735	4.347	0.767	1.22	1.12	0.243	0.004	0.324	no	yes	no	no	yes	no	None	V	no	no	F	no	0	0	0	no
chr1	91542022	91542844	6.938	6.847	5.972	3.133	0.987	0.861	0.452	0.257	0.108	0.023	no	no	yes	no	yes	no	None	IV	no	yes	G	no	0	0	0	no
chr1	91614089	91614698	3.965	5.315	7.221	3.97	1.34	1.821	1.001	0.57	0.011	0.798	no	yes	no	no	yes	no	None	IV	no	no	H	no	0	0	0	no
chr1	91964923	91967765	8.248	9.508	10.572	7.182	1.153	1.282	0.871	0.011	0.109	0.014	yes	no	yes	no	no	yes	CDC7	IX	no	no	F	no	0	0	0	no
chr1	92269210	92270561	6.112	8.287	8.607	8.783	1.356	1.408	1.437	0.001	0.084	0.261	yes	no	no	no	no	no	None	IX	no	no	H	no	0	0	0	no
chr1	92329599	92330509	4.395	5.342	5.951	5.583	1.215	1.354	1.27	0.991	0.009	0.762	no	yes	no	no	no	no	None	V	no	no	H	no	0	0	0	no
chr1	92350442	92352320	6.348	9.93	11.13	4.962	1.564	1.753	0.782	0.231	0.254	0.042	no	no	yes	no	no	yes	TGFBR3	IX	no	no	I	yes	2.95661	3.97218	1.34349	no
chr1	92875802	92877417	3.848	3.74	2.898	0.881	0.972	0.753	0.229	0.15	0.778	0.003	no	no	yes	yes	no	no	None	VIII	no	no	G	no	0	0	0	no
chr1	92920845	92921468	3.984	5.405	3.233	1.334	1.356	0.811	0.335	0.35	0.321	0.001	no	no	yes	yes	no	no	None	VIII	no	no	G	no	0	0	0	no
chr1	93147520	93147990	4.926	6.184	6.037	2.436	1.255	1.226	0.495	0.47	0.178	0.019	no	no	yes	no	no	no	None	IV	no	no	F	no	0	0	0	yes
chr1	93880042	93881172	5.937	6.557	10.169	7.251	1.104	1.713	1.221	0.596	0.041	0.198	no	yes	no	no	no	no	None	IX	no	no	H	no	0	0	0	no
chr1	94031559	94032244	4.339	2.806	4.947	1.638	0.647	1.14	0.378	0.349	0.147	0.022	no	no	yes	no	no	no	None	VIII	no	no	G	no	0	0	0	no
chr1	94173348	94175135	4.558	5.688	6.406	5.225	1.248	1.405	1.146	0.033	0.002	0.039	yes	yes	yes	no	no	no	None	II	no	no	F	no	0	0	0	no
chr1	94456819	94457449	4.808	4.899	6.047	5.59	1.019	1.258	1.163	0.713	0.014	0.053	no	yes	no	yes	no	no	None	V	no	no	F	no	0	0	0	no
chr1	94878878	94879288	4.294	3.335	1.218	3.439	0.777	0.284	0.801	0.442	0.021	0.479	no	yes	no	yes	no	no	None	VIII	no	no	G	no	0	0	0	no
chr1	94928626	94929582	4.256	1.428	2.974	1.336	0.335	0.699	0.314	0.01	0.842	0.01	yes	no	yes	yes	no	no	None	VIII	no	no	G	yes	5.29764	7.07885	1.33623	no
chr1	95071385	95074545	4.324	4.797	4.033	3.411	1.109	0.933	0.789	0.376	0.105	0.006	no	no	yes	no	no	no	None	V	no	no	F	no	0	0	0	no
chr1	95091352	95092114	2.142	3.697	5.561	3.891	1.726	2.597	1.817	0.318	0.002	0.384	no	yes	no	no	no	no	None	V	no	no	E	no	0	0	0	no
chr1	95167121	95168144	5.268	4.987	4.448	4.009	0.946	0.844	0.761	0.851	0.525	0.034	no	no	yes	no	no	no	None	V	no	no	G	no	0	0	0	no
chr1	95175743	95180426	5.426	7.598	5.985	6.928	1.4	1.103	1.277	0.139	0.879	0.011	no	no	yes	no	no	no	None	II	no	no	H	no	0	0	0	no
chr1	95202725	95203810	5.888	7.528	6.727	5.133	1.279	1.143	0.872	0.02	0.669	0.114	yes	no	no	no	no	no	None	II	no	no	F	no	0	0	0	no
chr1	95221251	95222578	4.38	4.31	6.201	3.774	0.984	1.416	0.862	0.854	0.03	0.301	no	yes	no	no	no	no	None	V	no	no	F	no	0	0	0	no
chr1	95296174	95297970	6.513	7.431	10.66	10.307	1.141	1.637	1.583	0.131	0.057	0.011	no	no	yes	no	no	no	None	IX	no	no	H	no	0	0	0	no
chr1	95537979	95539428	4.947	7.282	7.759	4.991	1.472	1.569	1.009	0.186	0.036	0.664	no	yes	no	no	no	yes	ALG14	II	no	no	I	no	0	0	0	no
chr1	97301180	97301581	5.02	6.925	7.862	5.164	1.379	1.566	1.029	0.02	0.004	0.457	yes	yes	no	no	no	no	None	II	no	yes	H	no	0	0	0	no
chr1	97603786	97604151	3.56	0.902	3.426	3.238	0.253	0.962	0.909	0.008	0.816	0.891	yes	no	no	yes	no	no	None	VIII	no	no	G	no	0	0	0	no
chr1	98513799	98514123	5.639	6.782	9.646	4.678	1.203	1.711	0.83	0.121	0.028	0.318	no	yes	no	no	no	no	None	II	no	no	H	no	0	0	0	no
chr1	98789027	98790055	3.637	3.809	5.02	3.901	1.047	1.38	1.073	0.881	0.007	0.736	no	yes	no	no	no	no	None	V	no	no	F	no	0	0	0	no
chr1	100416877	100417569	5.379	1.391	3.022	1.299	0.259	0.562	0.241	0.246	0.24	0.004	no	no	yes	yes	no	no	None	VIII	no	no	G	no	0	0	0	no
chr1	100793706	100794077	5.749	5.368	5.131	4.413	0.934	0.893	0.768	0.525	0.716	0.029	no	no	yes	no	no	no	None	V	no	no	G	no	0	0	0	no
chr1	100809275	100809754	4.65	2.564	3.04	1.395	0.551	0.654	0.3	0.131	0.149	0.004	no	no	yes	no	no	no	None	VIII	no	no	G	no	0	0	0	no
chr1	100865678	100866792	7.733	7.054	8.916	7.596	0.912	1.153	0.982	0.077	0.037	0.123	no	yes	no	no	no	no	None	IX	no	no	F	no	0	0	0	no
chr1	101758791	101759424	2.411	4.888	6.791	5.526	2.028	2.817	2.292	0.03	0.049	0.059	yes	yes	no	no	no	no	None	V	no	no	E	no	0	0	0	no
chr1	102246743	102247740	11.16	12.46	13.781	14.699	1.116	1.235	1.317	0.88	0.003	0.786	no	yes	no	no	no	no	None	VI	no	no	F	no	0	0	0	no
chr1	103571898	103572816	4.222	5.042	6.449	3.697	1.194	1.528	0.876	0.383	0.038	0.081	no	yes	no	no	no	no	None	IV	no	no	F	no	0	0	0	no
chr1	105008031	105011452	6.444	5.861	8.531	6.245	0.91	1.324	0.969	0.756	0.021	0.697	no	yes	no	yes	no	no	None	II	no	no	F	no	0	0	0	no
chr1	105038148	105038653	4.415	1.399	1.585	1.755	0.317	0.359	0.397	0.001	0.211	0.263	yes	no	no	yes	no	no	None	VIII	no	no	G	no	0	0	0	no
chr1	107590736	107591281	5.575	3.763	6.667	6.97	0.675	1.196	1.25	0.083	0.016	0.144	no	yes	no	no	no	no	None	II	no	no	F	no	0	0	0	no
chr1	108102450	108103985	3.603	1.966	2.033	3.428	0.546	0.564	0.951	0.011	0.109	0.394	yes	no	no	no	no	no	None	VIII	no	no	G	no	0	0	0	no
chr1	108327990	108329502	5.739	4.848	5.223	3.97	0.845	0.91	0.692	0.094	0.586	0.013	no	no	yes	no	no	no	None	V	no	no	G	no	0	0	0	no
chr1	109676511	109677529	2.494	4.96	4.771	3.104	1.989	1.913	1.245	0.03	0.252	0.776	yes	no	no	no	no	no	None	IV	no	no	C	no	0	0	0	no
chr1	109791715	109793548	11.774	13.357	13.43	8.697	1.134	1.141	0.739	0.007	0.028	0.2	yes	yes	no	no	no	yes	CELSR2	VII	no	no	F	no	0	0	0	no
chr1	110008863	110010318	4.527	6.115	5.291	2.361	1.351	1.169	0.522	0.117	0.431	0.043	no	no	yes	no	yes	yes	SYPL2	IV	no	no	F	no	0	0	0	no
chr1	110020039	110020892	2.9	7.224	5.657	1.277	2.491	1.95	0.44	0.007	0.265	0.452	yes	no	no	no	yes	no	None	IV	no	yes	C	no	0	0	0	no
chr1	110025635	110027111	14.917	13.004	15.412	10.585	0.872	1.033	0.71	0.788	0.501	0.016	no	no	yes	no	yes	yes	ATXN7L2	VI	no	no	G	no	0	0	0	no
chr1	110035681	110038110	11.882	12.236	16.227	10.528	1.03	1.366	0.886	0.041	0.646	0.178	yes	no	no	no	yes	yes	CYB561D1	VI	no	no	F	no	0	0	0	no
chr1	110042368	110042880	1.103	5.098	3.447	2.859	4.62	3.124	2.591	0.041	0.226	0.894	yes	no	no	no	yes	no	None	VIII	no	no	D	yes	3.37886	8.88855	2.63064	yes
chr1	110051353	110053263	8.272	8.095	11.218	5.824	0.979	1.356	0.704	0.097	0.137	0.006	no	no	yes	no	yes	yes	AMIGO1	IX	no	no	F	no	0	0	0	no
chr1	110073920	110076071	7.647	9.822	11.227	7.645	1.284	1.468	1	0.007	0.063	0.035	yes	no	yes	no	yes	no	None	I	no	no	F	yes	3.52809	12.6396	3.58257	yes
chr1	110182837	110183602	6.229	12.968	10.257	5.747	2.082	1.647	0.923	0.053	0.04	0.792	no	yes	no	no	yes	no	None	IX	no	no	C	yes	2.7465	5.86482	2.13538	yes
chr1	110366080	110367477	2.789	4.292	2.933	0.891	1.539	1.052	0.319	0.012	0.311	0.217	yes	no	no	no	yes	no	None	VIII	no	no	I	no	0	0	0	no
chr1	110427967	110431165	5.884	6.76	8.341	6.892	1.149	1.417	1.171	0.649	0	0.015	no	yes	yes	no	yes	no	None	II	no	no	F	no	0	0	0	no
chr1	110442556	110443359	3.668	5.638	7.354	5.484	1.537	2.005	1.495	0.138	0.048	0.827	no	yes	no	no	yes	no	None	II	no	no	H	no	0	0	0	no
chr1	110490190	110490751	4.59	3.02	4.851	1.243	0.658	1.057	0.271	0.599	0.499	0.003	no	no	yes	no	yes	no	None	VIII	no	no	G	no	0	0	0	no
chr1	110526696	110528218	5.631	9.819	9.194	4.884	1.744	1.633	0.867	0.076	0.015	0.133	no	yes	no	no	no	yes	AHCYL1	IX	no	no	I	yes	2.49867	11.3981	4.56166	no
chr1	110602521	110603331	2.475	6.687	5.614	1.357	2.702	2.268	0.548	0.009	0.696	0.657	yes	no	no	no	no	no	None	IV	no	no	C	yes	5.67967	15.2016	2.67649	yes
chr1	110643812	110646166	5.065	6.862	6.551	7.985	1.355	1.293	1.577	0.152	0.452	0	no	no	yes	no	no	no	None	II	no	no	H	no	0	0	0	no
chr1	110718922	110719267	0.969	4.909	4.696	1.425	5.067	4.847	1.47	0.073	0.047	0.423	no	yes	no	no	no	no	None	VIII	no	no	D	no	0	0	0	no
chr1	110739538	110740057	5.621	9.212	10.523	7.22	1.639	1.872	1.285	0.066	0.036	0.845	no	yes	no	no	no	no	None	IX	no	no	H	yes	7.03285	9.05971	1.2882	yes
chr1	110749893	110750934	4.237	6.553	6.154	4.237	1.547	1.453	1	0.013	0.015	0.207	yes	yes	no	no	no	no	None	IV	no	no	I	no	0	0	0	yes
chr1	110954984	110955442	8.811	9.707	11.979	8.15	1.102	1.36	0.925	0.07	0.941	0.021	no	no	yes	no	no	no	None	I	no	yes	F	yes	9.51504	12.7913	1.34433	yes
chr1	111067025	111068456	4.717	7.609	8.762	3.804	1.613	1.858	0.807	0.002	0.002	0.65	yes	yes	no	no	no	no	None	II	no	no	I	yes	7.35855	7.58976	1.03142	no
chr1	111417885	111418273	6.28	4.557	5.868	5.716	0.726	0.934	0.91	0.008	0.42	0.706	yes	no	no	no	no	no	None	V	no	no	G	no	0	0	0	no
chr1	112012930	112015192	12.612	11.309	19.918	9.398	0.897	1.579	0.745	0.916	0.102	0.01	no	no	yes	no	no	no	None	VI	no	no	F	no	0	0	0	no
chr1	112018131	112022944	6.026	7.839	8.408	6.177	1.301	1.395	1.025	0.615	0	0.806	no	yes	no	no	no	no	None	II	no	no	F	no	0	0	0	no
chr1	112024232	112024645	2.556	4.284	5.931	2.371	1.676	2.32	0.928	0.079	0.02	0.256	no	yes	no	no	no	no	None	VIII	no	no	C	no	0	0	0	no
chr1	112045721	112049085	7.371	8.838	11.214	10.017	1.199	1.521	1.359	0.924	0.018	0.066	no	yes	no	no	no	yes	ADORA3	I	no	no	H	no	0	0	0	no
chr1	112135182	112137841	3.797	6.484	5.309	3.898	1.708	1.398	1.027	0.007	0.816	0.792	yes	no	no	no	no	no	None	IV	no	no	I	no	0	0	0	no
chr1	112289754	112290180	4.744	3.252	6.4	4.853	0.685	1.349	1.023	0.302	0.03	0.274	no	yes	no	no	no	no	None	V	no	no	F	yes	4.70234	7.64543	1.62588	yes
chr1	113160687	113163149	13.802	27.105	24.037	15.267	1.964	1.742	1.106	0.282	0.192	0.027	no	no	yes	no	no	yes	ST7L	III	no	no	C	no	0	0	0	no
chr1	113240161	113241728	5.483	6.899	6.816	5.996	1.258	1.243	1.094	0.072	0.04	0.169	no	yes	no	no	no	no	None	II	no	no	F	no	0	0	0	no
chr1	113245636	113250808	5.895	7.452	6.962	5.421	1.264	1.181	0.92	0.049	0.365	0.597	yes	no	no	no	no	yes	RHOC	II	no	no	F	no	0	0	0	no
chr1	113361623	113362377	9.953	7.056	11.674	9.302	0.709	1.173	0.935	0.131	0.003	0.491	no	yes	no	no	no	no	None	I	no	no	F	no	0	0	0	no
chr1	113589211	113589701	5.442	6.172	8.054	6.464	1.134	1.48	1.188	0.31	0.043	0.07	no	yes	no	no	no	no	None	II	no	no	F	no	0	0	0	no
chr1	113734205	113735241	5.353	6.559	6.625	5.338	1.225	1.238	0.997	0.193	0.037	0.737	no	yes	no	no	no	no	None	II	no	no	F	no	0	0	0	no
chr1	114402105	114402503	5.232	3.544	4.956	4.657	0.677	0.947	0.89	0.019	0.562	0.743	yes	no	no	no	no	no	None	V	no	no	G	no	0	0	0	no
chr1	114416748	114417502	3.639	2.258	2.143	1.328	0.62	0.589	0.365	0.273	0.191	0.03	no	no	yes	no	no	no	None	VIII	no	no	G	no	0	0	0	no
chr1	114708632	114712397	6.423	9.332	8.064	10.027	1.453	1.256	1.561	0.086	0.462	0.017	no	no	yes	no	no	no	None	IX	no	no	H	no	0	0	0	no
chr1	114878754	114879558	4.599	3.912	3.927	4.531	0.851	0.854	0.985	0.199	0.246	0.012	no	no	yes	no	no	no	None	V	no	no	G	no	0	0	0	no
chr1	114881940	114883532	4.126	2.405	3.436	2.512	0.583	0.833	0.609	0.093	0.041	0.099	no	yes	no	no	no	no	None	VIII	no	no	G	no	0	0	0	no
chr1	115258883	115260039	7.96	15.106	12.606	11.468	1.898	1.584	1.441	0.161	0.037	0.15	no	yes	no	no	no	yes	NRAS	VII	no	no	H	no	0	0	0	no
chr1	115396027	115397611	8.258	11.101	12.501	9.902	1.344	1.514	1.199	0.01	0.072	0.868	yes	no	no	no	no	yes	SYCP1	I	no	no	H	no	0	0	0	no
chr1	115631430	115633220	4.5	9.075	9.339	5.135	2.017	2.075	1.141	0.14	0.005	0.753	no	yes	no	no	no	yes	TSPAN2	IX	no	no	C	no	0	0	0	no
chr1	115681605	115681925	4.098	6.339	6.997	4.498	1.547	1.707	1.098	0.041	0.106	0.905	yes	no	no	no	no	no	None	IV	no	no	H	yes	3.98609	3.23446	0.811437	yes
chr1	115775358	115775895	1.252	2.75	4.61	1.479	2.197	3.683	1.182	0.423	0.001	0.423	no	yes	no	no	no	no	None	VIII	no	no	C	no	0	0	0	no
chr1	115883630	115884164	3.77	1.024	3.267	3.863	0.272	0.867	1.025	0.031	0.935	0.79	yes	no	no	no	no	no	None	VIII	no	no	G	no	0	0	0	no
chr1	115974265	115975510	5.325	9.695	14.012	9.492	1.821	2.631	1.783	0.007	0.004	0.008	yes	yes	yes	no	no	no	None	I	yes	yes	E	no	0	0	0	no
chr1	115978455	115978810	1	2.582	4.779	3.031	2.582	4.78	3.031	0.333	0.046	0.25	no	yes	no	no	no	no	None	VIII	no	no	B	no	0	0	0	no
chr1	116012262	116013273	7.381	8.965	12.839	8.054	1.215	1.739	1.091	0.214	0.022	0.495	no	yes	no	no	no	no	None	I	no	no	H	no	0	0	0	no
chr1	116138353	116138874	2.183	4.497	5.98	3.391	2.06	2.739	1.553	0.042	0.022	0.613	yes	yes	no	no	no	no	None	IV	no	no	E	yes	5.37478	12.8676	2.39407	yes
chr1	116196972	116198030	5.233	8.048	6.471	2.952	1.538	1.237	0.564	0.031	0.609	0.089	yes	no	no	no	no	no	None	IV	no	no	I	no	0	0	0	no
chr1	116517452	116522956	8.244	10.321	13.347	9.158	1.252	1.619	1.111	0.242	0.047	0.465	no	yes	no	no	no	yes	SLC22A15	I	no	no	H	no	0	0	0	no
chr1	116854756	116856574	5.957	5.076	4.582	6.232	0.852	0.769	1.046	0.049	0.074	0.089	yes	no	no	no	no	no	None	V	no	no	G	no	0	0	0	no
chr1	117027569	117028332	6.377	8.215	9.93	4.792	1.288	1.557	0.752	0.2	0.029	0.027	no	yes	yes	no	no	no	None	IX	no	no	I	yes	2.9785	7.06165	2.37087	yes
chr1	117296897	117297500	4.068	5.515	4.499	5.581	1.356	1.106	1.372	0.461	0.165	0	no	no	yes	no	no	yes	CD2	V	no	no	H	no	0	0	0	no
chr1	117311861	117312760	8.461	10.384	15.247	11.152	1.227	1.802	1.318	0.768	0.068	0.011	no	no	yes	no	no	no	None	I	no	no	H	no	0	0	0	no
chr1	117390091	117390976	5.122	7.296	7.767	4.008	1.424	1.516	0.782	0.094	0.014	0.417	no	yes	no	no	no	no	None	II	no	no	I	no	0	0	0	no
chr1	117424311	117425151	2.486	3.637	3.963	2.366	1.463	1.594	0.952	0.043	0.418	0.193	yes	no	no	no	no	no	None	VIII	no	yes	I	no	0	0	0	no
chr1	118083536	118084468	4.345	3.743	4.99	1.077	0.861	1.148	0.248	0.21	0.969	0.009	no	no	yes	yes	no	no	None	VIII	no	no	G	no	0	0	0	no
chr1	118178395	118179719	4.844	5.404	6.876	5.524	1.116	1.419	1.14	0.007	0.157	0.805	yes	no	no	yes	no	no	None	II	no	no	F	no	0	0	0	no
chr1	118212496	118214287	5.14	6.164	6.532	5.358	1.199	1.271	1.042	0.832	0.049	0.667	no	yes	no	yes	no	no	None	II	no	no	F	no	0	0	0	no
chr1	119384892	119386131	7.005	11.069	20.758	13.093	1.58	2.963	1.869	0.293	0.037	0.184	no	yes	no	no	no	no	None	VI	no	no	E	no	0	0	0	no
chr1	119426966	119428409	2.379	4.822	4.776	6.269	2.027	2.008	2.635	0.046	0.341	0.217	yes	no	no	no	no	no	None	V	no	no	E	no	0	0	0	no
chr1	119430222	119430899	2.751	2.104	5.19	3.799	0.765	1.886	1.381	0.542	0.007	0.829	no	yes	no	no	no	no	None	V	no	yes	H	no	0	0	0	no
chr1	119502495	119503675	5.582	6.459	6.691	6.432	1.157	1.199	1.152	0.021	0.237	0.139	yes	no	no	no	no	no	None	II	no	no	F	no	0	0	0	no
chr1	119762330	119762852	3.435	1.306	2.69	2.421	0.38	0.783	0.705	0.003	0.556	0.003	yes	no	yes	no	no	no	None	VIII	no	no	G	no	0	0	0	no
chr1	120018218	120019007	9.008	9.626	11.835	7.558	1.069	1.314	0.839	0.09	0.262	0.023	no	no	yes	no	no	no	None	I	no	no	F	no	0	0	0	no
chr1	120106893	120108874	4.344	4.502	4.821	4.737	1.036	1.11	1.09	0.022	0.287	0.298	yes	no	no	no	no	yes	HSD3BP4	V	no	no	F	no	0	0	0	no
chr1	120254274	120257540	7.082	9.512	8.644	8.218	1.343	1.221	1.16	0.162	0.02	0.541	no	yes	no	no	no	yes	PHGDH	IX	no	no	F	no	0	0	0	no
chr1	120258221	120259480	2.699	6.063	5.052	2.816	2.246	1.872	1.043	0.012	0.314	0.223	yes	no	no	no	no	no	None	IV	no	no	C	no	0	0	0	no
chr1	120289150	120290318	4.227	3.865	3.584	1.153	0.914	0.848	0.273	0.824	0.2	0.007	no	no	yes	no	no	no	None	VIII	no	no	G	no	0	0	0	no
chr1	120325871	120326413	6.291	5.872	9.196	5.018	0.933	1.462	0.798	0.214	0.111	0.046	no	no	yes	no	no	no	None	II	no	no	F	no	0	0	0	no
chr1	120351611	120352013	5.935	4.946	6.72	5.263	0.833	1.132	0.887	0.154	0.493	0.034	no	no	yes	no	no	no	None	II	no	yes	F	yes	6.52337	9.31471	1.4279	yes
chr1	144989512	144989846	1.601	2.294	3.066	1.806	1.433	1.914	1.128	0.475	0.011	0.355	no	yes	no	no	no	no	None	VIII	no	no	H	yes	10.9947	2.62055	0.238346	no
chr1	144997146	145002598	5.468	7.045	8.964	7.3	1.288	1.639	1.335	0.017	0.011	0.074	yes	yes	no	no	no	yes	PDE4DIP	II	yes	no	H	no	0	0	0	no
chr1	145020493	145021796	4.559	6.164	6.116	6.83	1.352	1.342	1.498	0.118	0.82	0.006	no	no	yes	no	no	no	None	II	no	no	H	no	0	0	0	no
chr1	145058253	145059408	4.395	5.344	5.048	4.682	1.216	1.149	1.065	0.132	0.005	0.026	no	yes	yes	no	no	no	None	V	no	no	F	no	0	0	0	yes
chr1	145394385	145400251	3.606	4.747	4.542	3.544	1.316	1.259	0.983	0.011	0.232	0.493	yes	no	no	no	no	no	None	V	no	no	F	no	0	0	0	no
chr1	145439830	145442241	4.234	3.814	4.33	4.152	0.901	1.023	0.981	0.149	0.032	0.237	no	yes	no	no	no	no	None	V	no	no	F	no	0	0	0	no
chr1	145470153	145471001	14.584	21.568	25.563	14.179	1.479	1.753	0.972	0.123	0.037	0.22	no	yes	no	no	no	yes	POLR3GL	III	no	no	H	no	0	0	0	no
chr1	145484067	145484397	0.969	2.404	4.569	2.372	2.482	4.716	2.448	0.949	0.046	0.386	no	yes	no	no	no	no	None	VIII	no	no	B	no	0	0	0	no
chr1	146555456	146557451	5.395	11.197	10.621	7.372	2.075	1.969	1.366	0.17	0.135	0.037	no	no	yes	no	no	no	None	IX	no	no	C	no	0	0	0	no
chr1	146696419	146697488	7.19	7.954	8.817	5.064	1.106	1.226	0.704	0.258	0.116	0.03	no	no	yes	no	no	yes	FMO5	IX	no	no	F	no	0	0	0	no
chr1	146713986	146715931	9.204	14.406	10.628	5.832	1.565	1.155	0.634	0.142	0.039	0.071	no	yes	no	no	no	yes	CHD1L	VII	no	no	I	no	0	0	0	yes
chr1	147112483	147114155	5.134	5.16	5.225	3.929	1.005	1.018	0.765	0.55	0.521	0.007	no	no	yes	no	no	no	None	V	no	no	F	yes	2.7069	8.48952	3.13625	no
chr1	148928156	148928411	4.307	8.397	7.443	6.315	1.949	1.728	1.466	0.03	0.224	0.669	yes	no	no	no	no	yes	LOC645166	II	no	no	C	no	0	0	0	no
chr1	149160223	149160639	7.014	7.69	9.248	6.578	1.096	1.319	0.938	0.118	0.011	0.292	no	yes	no	no	no	no	None	IX	no	no	F	no	0	0	0	no
chr1	149163107	149163528	3.283	1.204	3.674	3.116	0.367	1.119	0.949	0.109	0.02	0.325	no	yes	no	no	no	no	None	VIII	no	no	F	no	0	0	0	no
chr1	149174506	149175300	9.237	9.178	11.327	9.678	0.994	1.226	1.048	0.366	0.032	0.124	no	yes	no	no	no	no	None	I	no	no	F	no	0	0	0	no
chr1	149214688	149216152	12.61	15.056	17.142	12.276	1.194	1.359	0.974	0.129	0.05	0.201	no	yes	no	no	no	no	None	VI	no	no	F	no	0	0	0	no
chr1	149858124	149861069	5.171	4.504	4.887	4.528	0.871	0.945	0.876	0.841	0.347	0.015	no	no	yes	no	no	yes	HIST2H2BE	V	yes	no	G	yes	9.99247	6.90264	0.690784	no
chr1	150025833	150026358	5.982	6.08	7.585	6.35	1.016	1.268	1.061	0.846	0.034	0.893	no	yes	no	no	no	no	None	II	no	no	F	no	0	0	0	no
chr1	150116671	150117171	3.754	3.865	4.183	1.381	1.029	1.114	0.368	0.714	0.944	0.02	no	no	yes	no	no	no	None	VIII	no	no	F	no	0	0	0	no
chr1	150141192	150141863	4.225	6.302	3.846	6.566	1.492	0.91	1.554	0.056	0.041	0.075	no	yes	no	no	no	no	None	V	no	no	H	yes	3.3142	5.51983	1.66551	yes
chr1	150334996	150338795	6.409	8.445	5.549	4.962	1.318	0.866	0.774	0.249	0.031	0.231	no	yes	no	no	no	yes	RPRD2	II	no	no	F	no	0	0	0	no
chr1	150647986	150648713	2.497	2.914	2.542	2.633	1.167	1.018	1.054	0.019	0.185	0.186	yes	no	no	no	no	no	None	VIII	no	no	F	no	0	0	0	no
chr1	150736975	150738522	4.247	3.289	3.623	4.247	0.774	0.853	1	0.233	0.014	0.003	no	yes	yes	no	no	yes	CTSS	V	no	no	G	no	0	0	0	no
chr1	150749642	150750509	6.026	4.806	6.433	7.443	0.798	1.068	1.235	0.32	0.335	0.042	no	no	yes	no	no	no	None	II	no	no	F	no	0	0	0	no
chr1	150948656	150950331	19.671	19.234	12.098	16.719	0.978	0.615	0.85	0.662	0.044	0.159	no	yes	no	yes	yes	no	None	III	no	no	G	no	0	0	0	no
chr1	150967886	150968725	2.51	6.349	3.918	3.113	2.53	1.561	1.24	0.017	0.215	0.636	yes	no	no	yes	yes	no	None	IV	no	no	C	yes	2.75741	7.98101	2.89439	no
chr1	150996972	150997937	2.871	4.898	5.128	2.402	1.706	1.786	0.837	0.032	0.143	0.819	yes	no	no	yes	yes	no	None	VIII	no	no	I	no	0	0	0	no
chr1	151006040	151006699	3.769	7.016	4.945	4.301	1.861	1.312	1.141	0.039	0.819	0.831	yes	no	no	yes	yes	no	None	IV	no	no	I	no	0	0	0	no
chr1	151130763	151133316	6.428	9.487	7.299	6.713	1.476	1.135	1.044	0.044	0.7	0.521	yes	no	no	yes	yes	no	None	IX	no	no	F	no	0	0	0	no
chr1	151161758	151162915	11.307	14.584	16.791	8.475	1.29	1.485	0.75	0.201	0.027	0.236	no	yes	no	yes	yes	yes	VPS72	VI	no	yes	I	no	0	0	0	no
chr1	151342408	151343477	6.888	9.419	10.866	7.34	1.367	1.578	1.066	0.065	0.004	0.086	no	yes	no	yes	yes	no	None	IX	no	no	H	no	0	0	0	no
chr1	151353353	151354087	4.626	5.617	5.045	1.515	1.214	1.091	0.328	0.307	0.069	0.003	no	no	yes	yes	yes	no	None	IV	no	no	F	no	0	0	0	no
chr1	151445366	151446435	3.525	7.917	6.053	3.934	2.246	1.717	1.116	0.039	0.148	0.845	yes	no	no	yes	yes	no	None	IV	no	no	C	no	0	0	0	no
chr1	151485064	151486634	4.563	5.395	5.209	5.231	1.182	1.141	1.146	0.021	0.896	0.973	yes	no	no	yes	yes	no	None	V	no	no	F	no	0	0	0	no
chr1	151566474	151567175	3.635	8.527	5.181	3.938	2.346	1.425	1.083	0.014	0.527	0.704	yes	no	no	no	no	no	None	IV	no	no	C	yes	6.40304	10.8638	1.69666	yes
chr1	151692920	151694535	3.341	6.495	4.775	3.745	1.944	1.429	1.121	0.032	0.371	0.862	yes	no	no	no	no	yes	RIIAD1	IV	no	yes	I	no	0	0	0	no
chr1	151893931	151894381	4.288	5.009	3.576	4.629	1.168	0.834	1.08	0.87	0.001	0.768	no	yes	no	no	no	no	None	V	no	no	F	no	0	0	0	no
chr1	151906172	151907325	5.941	4.071	5.737	4.826	0.685	0.966	0.812	0.476	0.89	0.039	no	no	yes	no	no	no	None	V	no	no	G	yes	3.12334	7.52768	2.41014	no
chr1	151918171	151919700	4.257	5.979	8.263	5.29	1.405	1.941	1.243	0.673	0.003	0.75	no	yes	no	no	no	no	None	II	no	no	H	no	0	0	0	no
chr1	153231806	153234506	4.674	5.437	4.919	4.757	1.163	1.052	1.018	0.035	0.873	0.895	yes	no	no	no	no	yes	LOR	V	no	no	F	no	0	0	0	no
chr1	153278973	153280354	7.43	8.314	11.364	7.742	1.119	1.53	1.042	0.826	0.41	0.03	no	no	yes	no	no	no	None	IX	no	yes	F	no	0	0	0	no
chr1	153325516	153326361	4.702	4.008	3.589	2.782	0.852	0.763	0.592	0.033	0.012	0.255	yes	yes	no	no	no	no	None	VIII	no	yes	G	no	0	0	0	no
chr1	153394937	153395254	1.149	5.375	5.756	4.477	4.677	5.009	3.896	0.047	0.049	0.107	yes	yes	no	yes	no	no	None	V	no	no	A	no	0	0	0	no
chr1	153540147	153541789	4.925	5.967	5.499	4.816	1.212	1.117	0.978	0.298	0.824	0.011	no	no	yes	yes	no	no	None	V	no	no	F	yes	3.2958	8.27974	2.51221	no
chr1	153549669	153550333	1.074	3.48	4.374	1.52	3.24	4.072	1.415	0.005	0.047	0.423	yes	yes	no	yes	no	no	None	VIII	no	no	D	no	0	0	0	no
chr1	153650076	153650516	5.719	5.499	6.579	3.364	0.961	1.15	0.588	0.372	0.49	0.008	no	no	yes	yes	no	no	None	IV	no	no	F	yes	3.584	10.1511	2.83234	yes
chr1	153761243	153767762	3.617	4.522	4.853	4.385	1.25	1.342	1.212	0.037	0.288	0.202	yes	no	no	yes	no	no	None	V	no	no	F	no	0	0	0	no
chr1	153892104	153896732	7.171	8.309	6.979	7.032	1.159	0.973	0.981	0.379	0.116	0.032	no	no	yes	yes	no	yes	GATAD2B	IX	no	no	F	no	0	0	0	no
chr1	154164383	154165393	8.079	6.897	6.196	8.071	0.854	0.767	0.999	0.031	0.019	0.254	yes	yes	no	no	yes	yes	TPM3	II	no	no	G	no	0	0	0	no
chr1	154339506	154339905	2.521	2.705	5.532	3.054	1.073	2.194	1.211	0.482	0.008	0.466	no	yes	no	no	yes	no	None	VIII	no	no	H	no	0	0	0	no
chr1	154346272	154346888	2.833	5.579	5.944	4.339	1.969	2.098	1.532	0.037	0.114	0.681	yes	no	no	no	yes	no	None	IV	no	no	E	no	0	0	0	no
chr1	154382663	154384382	5.008	5.901	6.553	5.961	1.178	1.308	1.19	0.104	0.027	0.493	no	yes	no	no	yes	no	None	II	no	no	F	no	0	0	0	no
chr1	154452241	154454300	3.41	4.403	6.046	6.531	1.291	1.773	1.915	0.329	0.027	0.04	no	yes	yes	no	yes	no	None	V	no	no	H	no	0	0	0	no
chr1	154457471	154458081	11.109	11.753	18.17	13.891	1.058	1.636	1.25	0.983	0.046	0.887	no	yes	no	no	yes	no	None	VI	no	no	H	no	0	0	0	no
chr1	154529617	154532313	9.584	21.403	16.309	10.25	2.233	1.702	1.07	0.091	0.012	0.941	no	yes	no	no	yes	yes	UBE2Q1	VI	no	no	C	no	0	0	0	no
chr1	154579637	154581427	4.133	6.636	6.239	4.066	1.606	1.51	0.984	0.202	0.036	0.355	no	yes	no	no	yes	yes	ADAR	IV	no	no	I	no	0	0	0	no
chr1	154928106	154929276	5.221	7.02	5.79	5.865	1.344	1.109	1.123	0.035	0.654	0.135	yes	no	no	no	no	yes	PBXIP1	II	no	no	F	yes	2.98957	9.23682	3.08968	no
chr1	155042890	155044433	6.016	7.575	8.899	4.722	1.259	1.479	0.785	0.239	0.103	0.03	no	no	yes	no	no	no	None	II	no	no	I	no	0	0	0	no
chr1	155176619	155177084	9.209	10.605	11.329	8.816	1.152	1.23	0.957	0.163	0.005	0.133	no	yes	no	no	no	no	None	I	no	no	F	yes	3.33681	12.5863	3.77196	yes
chr1	155206240	155206614	2.093	3.347	4.277	3.735	1.599	2.044	1.785	0.184	0.018	0.204	no	yes	no	no	no	no	None	VIII	no	no	E	no	0	0	0	no
chr1	155448746	155449399	4.8	3.388	3.708	5.019	0.706	0.772	1.045	0.043	0.342	0.328	yes	no	no	no	no	no	None	V	no	no	G	no	0	0	0	no
chr1	155607117	155607602	4.811	8.974	11.421	8.687	1.865	2.374	1.806	0.165	0.049	0.518	no	yes	no	no	no	no	None	IX	no	no	E	no	0	0	0	no
chr1	155919707	155920552	4.085	5.68	5.69	4.632	1.39	1.393	1.134	0.047	0.078	0.899	yes	no	no	no	yes	no	None	V	no	no	H	no	0	0	0	no
chr1	155995684	155996085	4.177	3.647	3.582	2.502	0.873	0.858	0.599	0.046	0.721	0.169	yes	no	no	no	yes	no	None	VIII	no	no	G	yes	2.86193	6.17894	2.15901	no
chr1	156018481	156019753	2.473	5.007	5.771	4.055	2.025	2.334	1.64	0.005	0.197	0.3	yes	no	no	no	yes	no	None	V	no	no	E	no	0	0	0	no
chr1	156053514	156055006	4.468	3.741	3.822	2.37	0.837	0.856	0.53	0.039	0.099	0.426	yes	no	no	no	yes	no	None	VIII	no	no	G	no	0	0	0	no
chr1	156098092	156099266	5.082	5.087	5.151	2.242	1.001	1.013	0.441	0.137	0.909	0.025	no	no	yes	no	yes	no	None	V	no	no	G	no	0	0	0	no
chr1	156122009	156126264	6.863	9.72	9.466	7.786	1.416	1.379	1.134	0.023	0.113	0.42	yes	no	no	no	yes	yes	SEMA4A	IX	no	no	I	no	0	0	0	no
chr1	156162890	156164568	3.027	3.647	4.529	3.029	1.205	1.497	1.001	0.215	0.008	0.186	no	yes	no	no	yes	yes	SLC25A44	VIII	no	no	F	no	0	0	0	yes
chr1	156182182	156183451	13.058	22.265	21.447	16.144	1.705	1.642	1.236	0.144	0.029	0.339	no	yes	no	no	yes	yes	PMF1	III	no	no	H	no	0	0	0	no
chr1	156246904	156247326	7.155	6.045	6.081	5.956	0.845	0.85	0.832	0.047	0.184	0.095	yes	no	no	no	yes	no	None	II	no	no	G	no	0	0	0	no
chr1	156390136	156391984	5.807	9.227	9.384	5.187	1.589	1.616	0.893	0.185	0.046	0.292	no	yes	no	no	yes	yes	MIR9-1	IX	no	no	I	no	0	0	0	no
chr1	156426149	156427686	6.136	11.394	10.172	6.746	1.857	1.658	1.099	0.116	0.043	0.501	no	yes	no	no	yes	no	None	IX	no	no	C	yes	3.52809	10.5917	3.0021	no
chr1	156521152	156523286	5.377	8.511	8.234	6.735	1.583	1.531	1.252	0.039	0.12	0.17	yes	no	no	yes	no	no	None	IX	no	no	H	no	0	0	0	no
chr1	156767939	156768525	5.777	9.537	11.574	8.932	1.651	2.004	1.546	0.258	0.033	0.7	no	yes	no	yes	no	no	None	I	no	no	H	no	0	0	0	no
chr1	156835946	156836812	0.969	5.646	4.878	3.826	5.827	5.035	3.949	0.038	0.255	0.244	yes	no	no	yes	no	no	None	IV	no	yes	A	no	0	0	0	no
chr1	157116742	157119011	7.084	7.255	12.508	8.853	1.024	1.766	1.25	0.159	0.03	0.15	no	yes	no	no	no	no	None	I	no	no	H	no	0	0	0	no
chr1	157239346	157240336	9.497	8.365	8.461	8.643	0.881	0.891	0.91	0.013	0.454	0.039	yes	no	yes	no	no	no	None	IX	no	no	G	no	0	0	0	no
chr1	157258771	157259332	10.353	10.73	11.393	10.406	1.036	1.1	1.005	0.808	0.045	0.062	no	yes	no	no	no	no	None	I	no	no	F	no	0	0	0	no
chr1	157372782	157375998	10.569	11.915	10.047	8.085	1.127	0.951	0.765	0.013	0.179	0.005	yes	no	yes	no	no	no	None	VII	no	no	F	no	0	0	0	no
chr1	157481565	157482246	4.726	3.103	4.459	5.571	0.657	0.943	1.179	0.646	0.037	0.003	no	yes	yes	no	no	no	None	V	no	no	G	no	0	0	0	no
chr1	157813883	157814477	3.513	3.63	5.524	4.921	1.033	1.572	1.401	0.203	0.004	0.235	no	yes	no	no	no	no	None	V	no	no	H	no	0	0	0	no
chr1	157818951	157820941	5.507	8.522	7.178	8.842	1.548	1.304	1.606	0.19	0.852	0.026	no	no	yes	no	no	no	None	II	no	no	H	no	0	0	0	no
chr1	157925515	157926049	6.141	7.345	6.633	8.92	1.196	1.08	1.453	0.886	0.325	0.031	no	no	yes	no	no	no	None	II	no	no	F	no	0	0	0	no
chr1	157990689	157991018	1.17	3.078	3.422	1.626	2.63	2.924	1.389	0.623	0.035	0.423	no	yes	no	no	no	no	None	VIII	no	no	E	no	0	0	0	no
chr1	158216403	158219071	9.256	9.648	12.159	9.531	1.042	1.314	1.03	0.487	0.009	0.346	no	yes	no	no	no	no	None	I	no	no	F	no	0	0	0	no
chr1	158255284	158256247	16.962	18.314	21.017	15.352	1.08	1.239	0.905	0.509	0.037	0.508	no	yes	no	no	no	no	None	III	no	no	F	no	0	0	0	no
chr1	158259400	158261179	4.979	3.706	2.296	4.141	0.744	0.461	0.832	0.041	0.027	0.224	yes	yes	no	no	no	yes	CD1C	V	no	no	G	no	0	0	0	no
chr1	158399943	158400297	5.68	3.659	5.799	7.783	0.644	1.021	1.37	0.286	0.12	0.014	no	no	yes	no	no	no	None	V	no	no	G	no	0	0	0	no
chr1	158901130	158901543	4.807	5.325	4.965	5.77	1.108	1.033	1.2	0.357	0.848	0.026	no	no	yes	no	no	yes	PYHIN1	V	no	no	F	no	0	0	0	no
chr1	159037520	159038465	7.425	7.066	7.847	7.399	0.952	1.057	0.996	0.019	0.056	0.351	yes	no	no	no	no	no	None	II	no	no	F	no	0	0	0	no
chr1	159057716	159058708	3.594	1.152	3.264	2.491	0.321	0.908	0.693	0.009	0.127	0.352	yes	no	no	no	no	no	None	VIII	no	no	G	no	0	0	0	no
chr1	159102140	159102433	4.503	5.856	7.215	4.607	1.3	1.602	1.023	0.796	0.017	0.226	no	yes	no	no	no	no	None	II	no	no	H	yes	6.09279	10.1511	1.66609	yes
chr1	159180721	159181682	3.482	3.641	4.672	1.787	1.046	1.342	0.513	0.865	0.926	0.023	no	no	yes	no	no	no	None	VIII	no	no	F	yes	3.69376	14.2852	3.8674	no
chr1	159184004	159184274	5.561	3.884	5.739	2.323	0.698	1.032	0.418	0.011	0.533	0.048	yes	no	yes	no	no	no	None	V	no	no	G	no	0	0	0	no
chr1	159794692	159797030	4.6	4.715	6.502	4.921	1.025	1.413	1.07	0.424	0.014	0.887	no	yes	no	no	no	yes	SLAMF8	V	no	no	F	no	0	0	0	no
chr1	159852289	159852752	4.263	2.857	3.4	3.854	0.67	0.797	0.904	0.283	0.045	0.619	no	yes	no	no	no	no	None	VIII	no	no	G	no	0	0	0	no
chr1	160000434	160002644	13.856	14.712	17.25	6.291	1.062	1.245	0.454	0.44	0.044	0.009	no	yes	yes	no	no	yes	PIGM	VI	no	no	F	no	0	0	0	no
chr1	160078232	160079625	2.157	3.88	5.096	2.436	1.799	2.362	1.129	0.2	0.004	0.587	no	yes	no	no	no	no	None	VIII	no	no	C	yes	5.03743	6.51372	1.29306	yes
chr1	160121112	160122412	2.185	3.867	3.86	1.243	1.77	1.767	0.569	0.029	0.296	0.185	yes	no	no	no	no	yes	ATP1A4	VIII	no	no	I	no	0	0	0	no
chr1	160331550	160333034	3.445	5.189	5.745	3.466	1.506	1.668	1.006	0.152	0.038	0.531	no	yes	no	no	no	no	None	IV	no	yes	I	no	0	0	0	no
chr1	160416653	160417363	3.446	1.099	2.558	1.243	0.319	0.742	0.361	0.142	0.249	0.004	no	no	yes	no	no	no	None	VIII	no	no	G	no	0	0	0	no
chr1	160514361	160514819	6.251	5.487	8.455	6.3	0.878	1.352	1.008	0.107	0.035	0.326	no	yes	no	no	no	no	None	II	no	no	F	no	0	0	0	yes
chr1	160516544	160517657	3.355	2.874	4.734	5.812	0.857	1.411	1.732	0.265	0.014	0.152	no	yes	no	no	no	no	None	V	no	no	F	no	0	0	0	no
chr1	160548457	160550466	5.846	4.417	6.408	6.112	0.756	1.096	1.046	0.025	0.094	0.913	yes	no	no	no	no	yes	CD84	II	no	no	F	no	0	0	0	no
chr1	160650418	160651672	9.166	9.158	13.091	8.078	0.999	1.428	0.881	0.945	0.021	0.593	no	yes	no	no	no	no	None	I	no	no	F	yes	5.87006	5.94644	1.01301	no
chr1	160652366	160653485	6.567	5.678	9.296	7.814	0.865	1.416	1.19	0.019	0.287	0.117	yes	no	no	no	no	no	None	IX	no	no	F	no	0	0	0	no
chr1	160673778	160674615	7.574	8.281	10.579	9.504	1.093	1.397	1.255	0.203	0.098	0.035	no	no	yes	no	no	no	None	I	no	no	F	no	0	0	0	no
chr1	160674948	160675578	4.626	6.931	7.113	5.741	1.498	1.538	1.241	0.438	0.028	0.971	no	yes	no	no	no	no	None	II	no	no	H	no	0	0	0	no
chr1	161014038	161018595	7.373	5.94	8.991	6.997	0.806	1.219	0.949	0.4	0.033	0.271	no	yes	no	no	no	yes	USF1	IX	no	no	F	no	0	0	0	no
chr1	161041630	161042371	10.244	9.636	13.715	6.005	0.941	1.339	0.586	0.799	0.114	0.048	no	no	yes	no	no	no	None	I	no	no	F	yes	3.74921	9.31471	2.48445	no
chr1	161066974	161068578	3.512	4.506	5.289	3.398	1.283	1.506	0.967	0.225	0.19	0.033	no	no	yes	no	no	yes	KLHDC9	V	no	no	F	no	0	0	0	yes
chr1	161101378	161103584	8.63	7.306	8.463	6.754	0.847	0.981	0.783	0.115	0.257	0.048	no	no	yes	no	no	yes	DEDD	IX	no	no	G	no	0	0	0	no
chr1	161120235	161121231	3.929	4.663	4.138	4.206	1.187	1.053	1.07	0.003	0.458	0.075	yes	no	no	no	no	no	None	V	no	no	F	no	0	0	0	no
chr1	161134616	161137302	5.285	8.164	8.344	6.14	1.545	1.579	1.162	0.043	0.109	0.055	yes	no	no	no	no	yes	PPOX	II	no	no	H	yes	3.08708	11.0338	3.57419	no
chr1	161178861	161180685	6.548	11.786	11.009	10.563	1.8	1.681	1.613	0.151	0.024	0.21	no	yes	no	no	no	no	None	I	no	no	H	yes	2.75741	9.05971	3.28559	yes
chr1	161237144	161237567	7.809	8.288	10.843	9.583	1.061	1.388	1.227	0.967	0.001	0.676	no	yes	no	no	no	no	None	I	no	no	F	no	0	0	0	no
chr1	161274552	161277781	6.368	12.282	11.689	8.664	1.929	1.836	1.361	0.23	0.025	0.109	no	yes	no	no	no	no	None	I	no	no	C	no	0	0	0	no
chr1	161373775	161374191	6.311	9.233	11.032	5.846	1.463	1.748	0.926	0.081	0.027	0.457	no	yes	no	no	no	no	None	IX	no	no	I	no	0	0	0	no
chr1	161456280	161457520	5.857	7.074	5.015	5.876	1.208	0.856	1.003	0.015	0.03	0.884	yes	yes	no	no	no	no	None	II	no	no	F	yes	3.30366	9.70976	2.93909	yes
chr1	161509722	161510699	4.957	7.93	7.251	4.492	1.6	1.463	0.906	0.129	0.028	0.166	no	yes	no	no	no	no	None	II	no	no	I	no	0	0	0	no
chr1	161719326	161720446	11.962	19.266	18.456	10.699	1.611	1.543	0.894	0.251	0.028	0.62	no	yes	no	no	no	yes	DUSP12	VI	no	no	I	no	0	0	0	no
chr1	161741685	161742695	4.431	2.312	2.612	4.458	0.522	0.59	1.006	0.275	0	0.93	no	yes	no	no	no	no	None	V	no	no	G	no	0	0	0	no
chr1	161958308	161960160	4.809	5.696	5.263	4.537	1.185	1.095	0.944	0.029	0.67	0.863	yes	no	no	no	no	no	None	V	no	no	F	no	0	0	0	no
chr1	162198996	162200666	5.16	3.955	3.172	6.121	0.766	0.615	1.186	0.014	0.011	0.014	yes	yes	yes	no	no	no	None	V	no	no	G	no	0	0	0	no
chr1	162330664	162331907	3.539	2.433	2.571	1.243	0.688	0.727	0.351	0.595	0.725	0.003	no	no	yes	no	no	no	None	VIII	no	no	G	no	0	0	0	no
chr1	163390713	163393640	4.918	5.401	6.328	5.128	1.098	1.287	1.043	0.952	0.021	0.278	no	yes	no	no	no	no	None	II	no	no	F	no	0	0	0	no
chr1	164688927	164690861	10.396	6.491	6.089	6.009	0.624	0.586	0.578	0.182	0.108	0.03	no	no	yes	no	no	no	None	II	no	no	G	no	0	0	0	no
chr1	164756562	164756907	2.395	4.979	4.81	2.393	2.079	2.008	0.999	0.007	0.106	0.189	yes	no	no	no	no	no	None	VIII	no	no	C	no	0	0	0	yes
chr1	165664402	165665465	2.61	2.012	4.392	2.421	0.771	1.683	0.928	0.427	0.044	0.456	no	yes	no	no	no	no	None	VIII	no	no	F	no	0	0	0	no
chr1	165737176	165739252	9.026	7.942	11.136	6.865	0.88	1.234	0.761	0.875	0.536	0.046	no	no	yes	no	no	yes	TMCO1	IX	no	no	F	no	0	0	0	no
chr1	165811916	165812906	4.224	4.35	3.93	3.542	1.03	0.93	0.839	0.091	0.182	0.019	no	no	yes	no	no	no	None	V	no	no	F	no	0	0	0	no
chr1	165840455	165841136	12.247	10.68	17.098	11.703	0.872	1.396	0.956	0.002	0.016	0.043	yes	yes	yes	no	no	no	None	VI	no	no	F	yes	3.90917	5.34054	1.36616	yes
chr1	167073339	167075461	5.633	3.944	5.895	4.78	0.7	1.047	0.849	0.043	0.806	0.049	yes	no	yes	no	no	no	None	V	no	no	G	no	0	0	0	no
chr1	167093245	167093905	4.463	5.886	6.159	4.121	1.319	1.38	0.923	0.026	0.01	0.65	yes	yes	no	no	no	no	None	IV	no	no	F	no	0	0	0	yes
chr1	167262299	167262640	5.453	1.621	2.655	4.185	0.297	0.487	0.767	0.037	0.339	0.319	yes	no	no	no	no	no	None	V	no	yes	G	no	0	0	0	no
chr1	167297946	167298817	6.829	6.997	6.65	8.782	1.025	0.974	1.286	0.624	0.679	0.002	no	no	yes	no	no	yes	POU2F1	II	no	no	F	no	0	0	0	no
chr1	167408341	167409292	2.607	4.882	6.24	2.782	1.872	2.393	1.067	0.037	0.568	0.485	yes	no	no	no	no	no	None	IV	no	no	C	no	0	0	0	no
chr1	167570574	167571716	15.42	18.387	18.6	17.649	1.192	1.206	1.145	0.038	0.041	0.608	yes	yes	no	no	no	no	None	III	no	no	F	no	0	0	0	no
chr1	167596808	167602156	6.706	9.671	9.532	8.397	1.442	1.421	1.252	0.102	0.007	0.824	no	yes	no	no	no	yes	RCSD1	IX	no	no	H	no	0	0	0	no
chr1	167627816	167628612	6.164	6.342	7.983	8.449	1.029	1.295	1.371	0.257	0.011	0.895	no	yes	no	no	no	no	None	II	no	no	F	no	0	0	0	no
chr1	167630598	167633640	3.178	5.009	7.528	7.328	1.576	2.369	2.306	0.057	0.022	0.273	no	yes	no	no	no	no	None	II	yes	no	E	no	0	0	0	no
chr1	167736654	167737567	3.211	2.451	4.318	4.351	0.763	1.345	1.355	0.183	0.02	0.923	no	yes	no	no	no	no	None	VIII	no	no	F	no	0	0	0	no
chr1	167789126	167789721	9.87	16.083	14.681	7.664	1.629	1.487	0.777	0.21	0.043	0.18	no	yes	no	no	no	no	None	VII	no	no	I	no	0	0	0	no
chr1	168179426	168179951	4.52	1.617	4.697	4.328	0.358	1.039	0.958	0.024	0.957	0.456	yes	no	no	no	no	no	None	V	no	no	G	no	0	0	0	no
chr1	168197730	168198995	5.344	5.416	6.793	7.505	1.013	1.271	1.404	0.904	0.039	0.354	no	yes	no	no	no	no	None	II	no	no	F	no	0	0	0	no
chr1	168489673	168490490	3.483	3.376	1.154	4.018	0.969	0.331	1.154	0.978	0.015	0.79	no	yes	no	yes	no	no	None	VIII	no	no	F	no	0	0	0	no
chr1	168572808	168573154	5.957	5.121	8.215	5.269	0.86	1.379	0.885	0.044	0.406	0.009	yes	no	yes	yes	no	no	None	II	no	no	F	no	0	0	0	yes
chr1	168948466	168949119	6.158	6.506	6.788	6.073	1.057	1.102	0.986	0.732	0.015	0.119	no	yes	no	no	no	no	None	II	no	yes	F	no	0	0	0	no
chr1	169084914	169085874	0.853	3.78	6.218	4.167	4.431	7.289	4.884	0.053	0.016	0.218	no	yes	no	no	no	no	None	V	no	no	A	no	0	0	0	no
chr1	169228497	169232438	7.177	5.073	7.125	7.645	0.707	0.993	1.065	0.184	0.028	0.994	no	yes	no	no	no	no	None	II	no	no	G	no	0	0	0	no
chr1	169570034	169570628	5.307	4.576	1.251	4.92	0.862	0.236	0.927	0.168	0.135	0.04	no	no	yes	no	no	no	None	V	no	no	G	no	0	0	0	yes
chr1	169573863	169574660	12.23	12.043	18.861	16.067	0.985	1.542	1.314	0.939	0.129	0.02	no	no	yes	no	no	no	None	VI	no	no	H	no	0	0	0	no
chr1	169666166	169667374	4.842	3.03	5.439	5.135	0.626	1.123	1.06	0.184	0.011	0.497	no	yes	no	no	no	no	None	V	no	no	F	no	0	0	0	no
chr1	171220500	171221909	4.741	6.272	5.79	4.677	1.323	1.221	0.986	0.46	0.077	0.035	no	no	yes	no	no	no	None	IV	no	no	F	yes	4.43071	13.402	3.0248	no
chr1	171614088	171614576	4.294	8.62	6.574	5.886	2.007	1.531	1.371	0.016	0.102	0.966	yes	no	no	no	no	no	None	II	no	no	C	no	0	0	0	yes
chr1	171710347	171712108	6.826	9.342	8.6	6.672	1.369	1.26	0.977	0.256	0.302	0.039	no	no	yes	no	no	yes	VAMP4	IX	no	no	F	no	0	0	0	no
chr1	171769660	171770941	4.188	5.787	8.4	5.778	1.382	2.006	1.38	0.099	0.017	0.639	no	yes	no	no	no	no	None	II	no	no	H	yes	2.55785	7.22429	2.82436	no
chr1	171771871	171772871	3.825	4.997	4.48	4.343	1.307	1.171	1.136	0.147	0.043	0.078	no	yes	no	no	no	no	None	V	no	no	F	no	0	0	0	no
chr1	172557755	172558520	4.429	4.679	4.349	2.801	1.057	0.982	0.633	0.706	0.655	0.034	no	no	yes	no	no	no	None	V	no	no	G	no	0	0	0	no
chr1	172585323	172586840	5.486	5.59	5.374	6.042	1.019	0.98	1.101	0.058	0.007	0.198	no	yes	no	no	no	no	None	II	no	no	F	no	0	0	0	no
chr1	172715392	172715957	7.187	5.788	7.393	9.103	0.805	1.029	1.267	0.037	0.804	0.269	yes	no	no	no	no	no	None	II	no	no	F	no	0	0	0	no
chr1	173007497	173008780	7.422	5.778	4.244	5.534	0.778	0.572	0.746	0.035	0.144	0.612	yes	no	no	no	no	no	None	II	no	no	G	no	0	0	0	no
chr1	173175792	173176743	7.389	9.847	8.515	7.997	1.333	1.153	1.082	0.182	0.018	0.738	no	yes	no	no	no	yes	TNFSF4	IX	no	no	F	no	0	0	0	no
chr1	173193292	173194549	5.329	3.395	4.559	5.84	0.637	0.855	1.096	0.164	0.093	0.039	no	no	yes	no	no	no	None	V	no	no	G	no	0	0	0	no
chr1	173386580	173387281	3.276	2.789	3.155	1.425	0.851	0.963	0.435	0.087	0.205	0.003	no	no	yes	no	no	no	None	VIII	no	no	G	no	0	0	0	no
chr1	173398632	173399388	3.016	5.322	5.377	2.812	1.764	1.782	0.932	0.006	0.186	0.202	yes	no	no	no	no	no	None	IV	no	no	I	no	0	0	0	no
chr1	173637214	173637603	7.201	5.523	7.651	5.28	0.767	1.063	0.733	0.598	0.708	0.026	no	no	yes	no	no	no	None	II	no	no	G	no	0	0	0	no
chr1	173638124	173640687	8.268	6.004	5.711	7.475	0.726	0.691	0.904	0.137	0.038	0.808	no	yes	no	no	no	yes	ANKRD45	II	no	no	G	no	0	0	0	no
chr1	173792954	173794462	6.472	10.094	8.208	6.726	1.56	1.268	1.039	0.047	0.148	0.874	yes	no	no	no	no	yes	CENPL	IX	no	no	I	no	0	0	0	no
chr1	173835586	173838721	5.875	7.803	9.123	6.15	1.328	1.553	1.047	0.144	0.019	0.719	no	yes	no	no	no	yes	SNORD77	IX	no	no	H	no	0	0	0	no
chr1	173976861	173979433	5.895	5.107	4.784	4.72	0.866	0.812	0.801	0.062	0.041	0.134	no	yes	no	no	no	no	None	V	no	no	G	no	0	0	0	no
chr1	175013053	175014177	4.187	6.7	8.967	4.675	1.6	2.142	1.117	0.346	0.003	0.966	no	yes	no	no	no	no	None	II	no	no	C	no	0	0	0	no
chr1	175160570	175163024	4.665	7.408	6.336	6.34	1.588	1.358	1.359	0.043	0.136	0.186	yes	no	no	no	no	yes	KIAA0040	II	no	no	I	no	0	0	0	no
chr1	175466610	175467842	2.817	6.956	7.66	5.246	2.469	2.719	1.863	0	0.006	0.083	yes	yes	no	no	no	no	None	II	no	no	E	no	0	0	0	no
chr1	175482608	175484638	5.27	7.594	8.683	6.511	1.441	1.648	1.236	0.298	0.046	0.662	no	yes	no	no	no	no	None	II	no	no	H	no	0	0	0	no
chr1	175502077	175503463	6.689	8.065	7.278	9.515	1.206	1.088	1.422	0.875	0.88	0.044	no	no	yes	no	no	no	None	IX	no	no	F	no	0	0	0	no
chr1	175597676	175598260	3.019	6.073	8.587	9.316	2.012	2.845	3.086	0.336	0.048	0.06	no	yes	no	no	no	no	None	II	no	no	E	no	0	0	0	no
chr1	175706569	175707005	2.356	2.621	5.899	5.731	1.112	2.503	2.432	0.764	0.103	0.044	no	no	yes	no	no	no	None	V	no	yes	E	no	0	0	0	no
chr1	175799540	175800149	3.948	1.409	2.69	2.37	0.357	0.681	0.6	0.015	0.867	0.556	yes	no	no	no	no	no	None	VIII	no	no	G	no	0	0	0	no
chr1	175811505	175812313	5.772	6.244	7.198	7.714	1.082	1.247	1.336	0.815	0.037	0.177	no	yes	no	no	no	no	None	II	no	no	F	no	0	0	0	no
chr1	175857063	175857422	3.966	7.167	6.567	4.114	1.807	1.656	1.037	0.004	0.394	0.866	yes	no	no	no	no	no	None	IV	no	yes	I	yes	3.79144	4.82985	1.27388	no
chr1	176709211	176709614	1.408	2.836	1.824	4.991	2.014	1.295	3.545	0.423	0.423	0.035	no	no	yes	yes	no	no	None	VIII	no	no	E	no	0	0	0	no
chr1	178985894	178986621	6.319	9.921	11.669	6.806	1.57	1.847	1.077	0.066	0.009	0.104	no	yes	no	no	no	no	None	IX	no	no	H	no	0	0	0	yes
chr1	178991059	178991419	3.101	6.328	8.12	4.328	2.041	2.618	1.396	0.048	0.081	0.663	yes	no	no	no	no	no	None	IV	no	no	E	no	0	0	0	no
chr1	179059270	179061331	3.841	4.608	5.13	2.917	1.2	1.336	0.76	0.236	0.031	0.242	no	yes	no	no	no	no	None	V	no	no	F	no	0	0	0	no
chr1	179197905	179199716	3.025	10.278	7.935	2.753	3.398	2.624	0.91	0.049	0.023	0.457	yes	yes	no	no	no	yes	ABL2	IV	no	no	C	no	0	0	0	no
chr1	179544580	179545650	2.79	5.034	3.805	2.225	1.804	1.364	0.798	0.039	0.74	0.389	yes	no	no	no	no	yes	NPHS2	VIII	no	no	I	no	0	0	0	no
chr1	179711222	179715635	4.082	8.284	4.54	3.573	2.03	1.112	0.875	0.215	0.227	0.024	no	no	yes	no	no	yes	FAM163A	IV	no	no	I	no	0	0	0	no
chr1	179739457	179740014	5.046	7.414	6.321	5.194	1.469	1.253	1.029	0.045	0.242	0.738	yes	no	no	no	no	no	None	II	no	no	F	yes	4.24324	4.52282	1.06589	no
chr1	179825596	179828039	4.011	2.978	3.628	1.942	0.742	0.905	0.484	0.176	0.474	0.046	no	no	yes	no	no	no	None	VIII	no	no	G	no	0	0	0	no
chr1	179836511	179837783	5.732	5.241	4.772	5.077	0.914	0.833	0.886	0.484	0.005	0.695	no	yes	no	no	no	no	None	V	no	no	G	yes	3.74921	6.69127	1.78471	yes
chr1	180119675	180120707	9.821	12.651	21.036	12.256	1.288	2.142	1.248	0.136	0.027	0.397	no	yes	no	no	no	no	None	VI	no	no	H	no	0	0	0	no
chr1	180147808	180148620	4.807	8.149	6.393	5.04	1.695	1.33	1.049	0.092	0.024	0.144	no	yes	no	no	no	no	None	II	no	no	I	yes	3.79144	7.24477	1.91082	no
chr1	180502620	180503115	6.01	5.93	7.104	5.904	0.987	1.182	0.982	0.103	0.007	0.054	no	yes	no	no	no	no	None	II	no	no	F	yes	4.13611	6.27307	1.51666	yes
chr1	180921653	180924435	7.42	8.859	5.873	5.316	1.194	0.791	0.716	0.538	0.024	0.406	no	yes	no	no	no	no	None	IX	no	no	G	no	0	0	0	no
chr1	181009614	181010017	2.252	4.992	2.698	3.224	2.217	1.198	1.432	0.013	0.185	0.186	yes	no	no	no	no	no	None	VIII	no	no	C	no	0	0	0	no
chr1	181010546	181011350	3.763	2.636	5.664	2.699	0.701	1.505	0.717	0.678	0.029	0.124	no	yes	no	no	no	no	None	VIII	no	no	G	no	0	0	0	no
chr1	181033179	181033780	6.912	5.492	5.522	5.983	0.795	0.799	0.866	0.025	0.433	0.083	yes	no	no	no	no	no	None	II	no	no	G	no	0	0	0	no
chr1	181121911	181123064	9.624	20.183	17.723	17.484	2.097	1.842	1.817	0.065	0.082	0.021	no	no	yes	no	no	no	None	VI	no	no	E	no	0	0	0	no
chr1	181366939	181367570	4.22	5.079	5.567	3.695	1.204	1.319	0.876	0.15	0.003	0.103	no	yes	no	no	no	no	None	V	no	no	F	no	0	0	0	no
chr1	181472154	181474534	8.061	6.609	9.618	9.163	0.82	1.193	1.137	0.349	0.042	0.776	no	yes	no	no	no	no	None	I	no	no	F	no	0	0	0	no
chr1	181525428	181527147	2.694	4.779	9.633	6.393	1.774	3.576	2.373	0.453	0.024	0.275	no	yes	no	no	no	no	None	II	no	no	E	no	0	0	0	no
chr1	181638237	181638939	5.125	4.259	4.68	3.416	0.831	0.913	0.667	0.216	0.029	0.047	no	yes	yes	no	no	no	None	V	no	no	G	no	0	0	0	no
chr1	181906114	181906488	5.323	7.287	8.111	5.853	1.369	1.524	1.099	0.199	0.001	0.368	no	yes	no	no	no	no	None	II	no	no	H	yes	3.4242	8.3857	2.44895	yes
chr1	182019986	182021376	4.287	4.595	4.051	5.929	1.072	0.945	1.383	0.884	0.049	0.046	no	yes	yes	no	yes	no	None	V	no	yes	F	no	0	0	0	no
chr1	182038092	182038878	5.439	11.555	8.639	6.743	2.124	1.588	1.24	0.142	0.047	0.467	no	yes	no	no	yes	no	None	IX	no	no	C	yes	7.05618	7.10948	1.00755	no
chr1	182050179	182050727	7.652	4.593	5.466	6.975	0.6	0.714	0.912	0.073	0.007	0.514	no	yes	no	no	yes	no	None	V	no	no	G	yes	3.33681	4.53062	1.35777	yes
chr1	182162966	182163381	3.414	3.255	4.485	3.825	0.954	1.314	1.12	0.198	0.006	0.22	no	yes	no	no	yes	no	None	VIII	no	no	F	no	0	0	0	no
chr1	182269106	182270350	9.786	14.558	16.664	13.088	1.488	1.703	1.337	0.173	0.038	0.782	no	yes	no	no	yes	no	None	VI	no	no	H	no	0	0	0	no
chr1	182363287	182364060	3.761	3.606	5.084	3.861	0.959	1.352	1.027	0.949	0.033	0.685	no	yes	no	no	yes	no	None	V	no	no	F	no	0	0	0	no
chr1	182365854	182366223	4.316	5.732	5.549	6.179	1.328	1.286	1.432	0.64	0.023	0.534	no	yes	no	no	yes	no	None	V	no	yes	H	no	0	0	0	yes
chr1	182452395	182454539	10.155	17.525	14.216	12.893	1.726	1.4	1.27	0.01	0.08	0.173	yes	no	no	no	yes	no	None	VI	no	no	I	no	0	0	0	no
chr1	182567595	182569315	2.752	3.226	4.668	3.715	1.172	1.696	1.35	0.016	0.469	0.591	yes	no	no	no	no	no	None	VIII	no	no	H	no	0	0	0	no
chr1	182602762	182604050	5.074	5.894	5.285	3.427	1.162	1.042	0.675	0.005	0.153	0.053	yes	no	no	no	no	no	None	IV	no	no	F	no	0	0	0	no
chr1	182621662	182622574	6.489	7.625	8.16	5.82	1.175	1.258	0.897	0.039	0.382	0.895	yes	no	no	no	no	no	None	II	no	no	F	no	0	0	0	no
chr1	182965063	182965465	6.629	7.067	10.241	8.565	1.066	1.545	1.292	0.66	0.035	0.14	no	yes	no	no	no	no	None	IX	no	no	H	no	0	0	0	no
chr1	183005188	183005476	2.593	3.052	7.399	2.751	1.177	2.853	1.061	0.784	0.016	0.185	no	yes	no	no	no	no	None	VIII	no	no	H	no	0	0	0	no
chr1	183439131	183439662	8.201	10.949	13.585	8.735	1.335	1.656	1.065	0.028	0.173	0.457	yes	no	no	no	no	yes	SMG7-AS1	I	no	yes	H	yes	2.82883	5.51019	1.94787	no
chr1	183557874	183561499	12.769	7.53	9.349	11.58	0.59	0.732	0.907	0.007	0.029	0.876	yes	yes	no	no	no	yes	NCF2	I	no	no	G	no	0	0	0	no
chr1	183779317	183779696	4.065	4.53	5.08	6.465	1.114	1.25	1.591	0.962	0.235	0.049	no	no	yes	no	no	no	None	V	no	no	F	no	0	0	0	no
chr1	183925496	183926240	7.223	8.027	11.798	8.137	1.111	1.633	1.127	0.167	0.047	0.32	no	yes	no	no	no	no	None	I	no	no	H	no	0	0	0	no
chr1	184005103	184007485	5.43	7.694	6.89	5.096	1.417	1.269	0.939	0.235	0.523	0.047	no	no	yes	no	no	yes	GLT25D2	II	no	no	F	no	0	0	0	no
chr1	184757940	184758527	6.476	4.167	7.526	5.542	0.643	1.162	0.856	0.015	0.223	0.062	yes	no	no	no	no	no	None	II	no	yes	F	no	0	0	0	no
chr1	184951083	184951628	5.857	7.234	5.485	6.578	1.235	0.936	1.123	0.015	0.504	0.487	yes	no	no	no	no	no	None	II	no	no	F	yes	3.39939	5.74529	1.69009	yes
chr1	185307595	185308749	8.76	8.697	13.45	10.398	0.993	1.535	1.187	0.325	0.029	0.475	no	yes	no	yes	no	no	None	I	no	no	F	no	0	0	0	no
chr1	185643207	185643738	3.675	2.233	1.084	0.702	0.608	0.295	0.191	0.117	0.198	0.033	no	no	yes	yes	no	no	None	VIII	no	no	G	no	0	0	0	no
chr1	186481172	186482214	5.104	9.584	12.698	7.02	1.878	2.488	1.375	0.012	0.019	0.857	yes	yes	no	no	no	no	None	IX	no	no	E	no	0	0	0	no
chr1	186807064	186809226	4.213	3.78	2.403	3.698	0.897	0.57	0.878	0.105	0.042	0.015	no	yes	yes	no	no	no	None	V	no	no	G	no	0	0	0	no
chr1	187603637	187604659	4.342	1.079	2.15	2.911	0.249	0.495	0.67	0.011	0.085	0.308	yes	no	no	yes	no	no	None	VIII	no	no	G	no	0	0	0	no
chr1	187808872	187809487	4.097	2.756	5.539	5.687	0.673	1.352	1.388	0.14	0.013	0.268	no	yes	no	yes	no	no	None	V	no	no	F	no	0	0	0	no
chr1	192777496	192778722	9.292	17.748	22.014	8.299	1.91	2.369	0.893	0.204	0.003	0.319	no	yes	no	yes	no	yes	RGS2	VI	no	no	C	no	0	0	0	no
chr1	193039086	193039827	0.98	2.076	5.926	1.964	2.12	6.05	2.005	0.423	0.03	0.423	no	yes	no	yes	no	no	None	VIII	no	no	B	no	0	0	0	no
chr1	193210125	193210838	3.175	7.052	5.883	5.394	2.221	1.853	1.699	0	0.003	0.456	yes	yes	no	yes	no	no	None	IV	no	no	C	no	0	0	0	no
chr1	193502841	193503220	4.259	1.738	1.279	1.488	0.408	0.3	0.349	0.021	0.021	0.021	yes	yes	yes	yes	no	no	None	VIII	no	no	G	no	0	0	0	no
chr1	197296908	197297271	0.919	1.593	3.811	1.85	1.733	4.145	2.012	0.423	0.028	0.423	no	yes	no	yes	no	no	None	VIII	no	no	B	no	0	0	0	yes
chr1	197811358	197811930	2.383	4.741	5.378	5.121	1.989	2.256	2.148	0.274	0.047	0.257	no	yes	no	no	no	no	None	V	no	no	E	no	0	0	0	no
chr1	197929215	197931507	7.329	5.267	6.378	7.098	0.719	0.87	0.968	0.038	0.292	0.295	yes	no	no	no	no	no	None	II	no	no	G	no	0	0	0	no
chr1	197958208	197958641	7.074	7.947	7.415	5.832	1.123	1.048	0.824	0.033	0.056	0.02	yes	no	yes	no	no	no	None	II	no	yes	F	no	0	0	0	no
chr1	198222898	198223245	5.401	3.032	3.831	2.648	0.561	0.709	0.49	0.018	0.302	0.087	yes	no	no	no	no	no	None	VIII	no	no	G	no	0	0	0	no
chr1	198648712	198652716	6.708	6.342	7.453	10.048	0.945	1.111	1.498	0.422	0.026	0.783	no	yes	no	no	no	no	None	II	no	no	F	no	0	0	0	no
chr1	199251869	199252543	4.443	1.829	2.646	3.275	0.412	0.595	0.737	0.034	0.64	0.055	yes	no	no	no	no	no	None	VIII	no	no	G	no	0	0	0	no
chr1	199945768	199947077	3.715	4.327	4.649	4.132	1.165	1.252	1.112	0.175	0.039	0.986	no	yes	no	no	no	no	None	V	no	no	F	no	0	0	0	no
chr1	200122668	200123769	8.595	8.921	10.057	8.789	1.038	1.17	1.023	0.571	0.048	0.347	no	yes	no	no	no	no	None	I	yes	no	F	no	0	0	0	no
chr1	200271128	200271841	4.938	4.109	3.526	1.916	0.832	0.714	0.388	0.258	0.085	0.016	no	no	yes	no	no	no	None	VIII	no	no	G	no	0	0	0	no
chr1	200332099	200333058	5.874	5.009	5.482	4.191	0.853	0.933	0.714	0.287	0.796	0.031	no	no	yes	no	no	no	None	V	no	no	G	no	0	0	0	no
chr1	200623706	200624434	4.801	5.703	4.302	4.718	1.188	0.896	0.983	0.548	0.042	0.998	no	yes	no	no	no	no	None	V	no	no	F	no	0	0	0	no
chr1	200838341	200839521	4.203	3.339	5.306	3.362	0.794	1.263	0.8	0.125	0.054	0.049	no	no	yes	no	no	no	None	V	no	no	F	no	0	0	0	no
chr1	200855719	200859048	8.267	9.603	16.681	8.732	1.162	2.018	1.056	0.275	0.032	0.77	no	yes	no	no	no	no	None	I	no	yes	H	no	0	0	0	no
chr1	200988339	200991142	8.353	10.469	15.02	9.771	1.253	1.798	1.17	0.291	0.043	0.41	no	yes	no	no	no	no	None	I	no	yes	H	no	0	0	0	no
chr1	201292677	201293492	5.708	7.157	7.309	6.001	1.254	1.281	1.051	0.023	0.078	0.155	yes	no	no	no	yes	no	None	II	no	no	F	no	0	0	0	no
chr1	201377328	201377743	5.39	11.469	10.158	6.184	2.128	1.885	1.147	0.068	0.016	0.396	no	yes	no	no	yes	no	None	IX	no	no	C	yes	6.72946	12.8083	1.90332	yes
chr1	201396844	201397482	2.761	4.858	1.255	0.972	1.76	0.454	0.352	0.012	0.58	0.193	yes	no	no	no	yes	no	None	VIII	no	no	I	no	0	0	0	no
chr1	201421941	201422319	1.103	6.559	5.885	1.334	5.945	5.334	1.209	0.029	0.035	0.423	yes	yes	no	no	yes	no	None	IV	no	no	D	no	0	0	0	no
chr1	201445030	201447220	6.137	11.723	10.228	8.662	1.91	1.666	1.411	0.194	0.022	0.907	no	yes	no	no	yes	no	None	IX	no	yes	H	no	0	0	0	no
chr1	201480998	201481571	5.075	7.547	8.694	7.437	1.487	1.713	1.465	0.08	0.05	0.072	no	yes	no	no	yes	no	None	II	no	no	H	no	0	0	0	no
chr1	201482151	201482410	3.626	6.269	6.966	4.414	1.729	1.921	1.217	0.123	0.007	0.457	no	yes	no	no	yes	no	None	IV	no	no	C	yes	3.76236	8.75496	2.32699	yes
chr1	201503805	201505596	6.178	4.483	4.896	4.517	0.726	0.792	0.731	0.018	0.059	0.045	yes	no	yes	no	yes	no	None	V	no	no	G	no	0	0	0	no
chr1	201513104	201513881	3.439	2.486	4.056	4.431	0.723	1.179	1.288	0.174	0.32	0.018	no	no	yes	no	yes	no	None	VIII	no	no	F	no	0	0	0	no
chr1	201553974	201554614	3.899	5.093	6.469	5.221	1.306	1.659	1.339	0.1	0.005	0.189	no	yes	no	no	yes	no	None	V	no	no	H	no	0	0	0	no
chr1	201644131	201645889	6.509	8.18	7.978	6.448	1.257	1.226	0.991	0.004	0.004	0.066	yes	yes	no	no	yes	no	None	IX	no	no	F	no	0	0	0	no
chr1	201673323	201673647	5.541	8.733	8.585	5.001	1.576	1.549	0.903	0.205	0.033	0.241	no	yes	no	no	yes	no	None	IX	no	no	I	yes	6.54885	6.5548	1.00091	yes
chr1	201684619	201685810	10.841	11.036	14.16	11.954	1.018	1.306	1.103	0.489	0.008	0.442	no	yes	no	no	yes	no	None	I	no	no	F	no	0	0	0	no
chr1	201709463	201710246	5.732	6.075	6.82	6.911	1.06	1.19	1.206	0.018	0.022	0.584	yes	yes	no	no	yes	no	None	II	no	no	F	no	0	0	0	no
chr1	201796862	201799105	11.683	13.346	14.084	7.189	1.142	1.206	0.615	0.445	0.462	0.038	no	no	yes	no	yes	yes	IPO9	VII	no	no	F	no	0	0	0	no
chr1	202088065	202088464	5.093	6.53	8.682	5.242	1.282	1.705	1.029	0.146	0.014	0.242	no	yes	no	no	no	no	None	II	no	no	H	yes	3.30936	10.2613	3.10069	yes
chr1	202185643	202186477	7.065	7.355	8.347	6.912	1.041	1.181	0.978	0.038	0.084	0.238	yes	no	no	no	no	no	None	IX	no	no	F	no	0	0	0	no
chr1	202206165	202206705	4.663	9.119	10.275	4.613	1.956	2.203	0.989	0.026	0.123	0.979	yes	no	no	no	no	no	None	IX	no	no	C	yes	12.2907	3.1148	0.253428	no
chr1	202284557	202285231	3.923	6.045	6.993	5.133	1.541	1.782	1.308	0.038	0.059	0.794	yes	no	no	no	no	no	None	II	no	no	H	yes	8.82023	8.62473	0.977835	no
chr1	202457331	202457871	3.854	2.69	4.416	1.174	0.698	1.146	0.304	0.066	0.158	0.001	no	no	yes	no	no	no	None	VIII	no	no	G	no	0	0	0	no
chr1	202935702	202938660	7.43	9.044	10.568	8.983	1.217	1.422	1.209	0.456	0.021	0.574	no	yes	no	no	no	yes	CYB5R1	I	no	no	H	yes	3.30366	3.84209	1.16298	no
chr1	202994835	202996289	17.316	18.719	20.46	12.834	1.081	1.182	0.741	0.438	0.176	0.028	no	no	yes	no	no	no	None	III	no	no	F	no	0	0	0	no
chr1	203044207	203046465	9.276	9.773	8.894	7.082	1.054	0.959	0.763	0.544	0.989	0.045	no	no	yes	no	no	no	None	IX	no	no	F	no	0	0	0	no
chr1	203118300	203119024	3.706	3.279	3.858	1.062	0.885	1.041	0.287	0.06	0.141	0.005	no	no	yes	no	no	no	None	VIII	no	no	G	no	0	0	0	no
chr1	203289483	203290789	4.799	6.736	6.195	4.953	1.404	1.291	1.032	0.019	0.098	0.749	yes	no	no	no	no	no	None	II	no	yes	F	no	0	0	0	no
chr1	203309234	203310038	3.213	6.725	7.909	4.66	2.093	2.462	1.451	0.012	0.094	0.53	yes	no	no	no	no	no	None	II	no	no	E	yes	3.10497	7.94589	2.55909	no
chr1	203473837	203474118	5.706	8.011	8.857	7.243	1.404	1.552	1.269	0.018	0.081	0.035	yes	no	yes	no	no	no	None	IX	no	no	H	yes	3.117	6.41951	2.05952	yes
chr1	203562682	203563246	3.435	5.721	5.061	1.515	1.666	1.473	0.441	0.065	0.279	0.003	no	no	yes	no	no	no	None	IV	no	no	I	no	0	0	0	no
chr1	203737549	203739326	5.875	9.745	9.429	8.58	1.659	1.605	1.46	0.012	0.23	0	yes	no	yes	no	yes	no	None	IX	no	no	H	no	0	0	0	no
chr1	203797560	203800297	2.997	6.05	9.013	5.363	2.018	3.007	1.789	0.039	0.053	0.541	yes	no	no	no	yes	no	None	II	no	no	E	no	0	0	0	no
chr1	203899347	203899732	6.042	4.285	3.474	5.228	0.709	0.575	0.865	0.321	0.033	0.086	no	yes	no	no	yes	no	None	V	no	no	G	no	0	0	0	no
chr1	204026356	204027398	6.467	6.765	6.911	3.17	1.046	1.069	0.49	0.955	0.021	0.061	no	yes	no	no	yes	no	None	IV	no	no	F	no	0	0	0	no
chr1	204041947	204044555	7.605	12.117	11.666	7.223	1.593	1.534	0.95	0.185	0.078	0.018	no	no	yes	no	yes	yes	SOX13	VII	no	no	I	no	0	0	0	no
chr1	204063622	204065146	10.029	13.258	17.895	10.804	1.322	1.784	1.077	0.116	0.044	0.448	no	yes	no	no	yes	no	None	VI	no	no	H	no	0	0	0	no
chr1	204096752	204097069	4.538	4.642	2.73	1.484	1.023	0.602	0.327	0.806	0.29	0.013	no	no	yes	no	yes	no	None	VIII	no	no	G	yes	3.79144	7.58976	2.00181	yes
chr1	204097859	204098618	5.33	11.422	11.763	6.499	2.143	2.207	1.219	0.174	0.017	0.982	no	yes	no	no	yes	no	None	IX	no	no	C	no	0	0	0	yes
chr1	204146105	204146747	0.969	3.159	8.322	8.062	3.26	8.59	8.321	0.291	0.017	0.061	no	yes	no	no	yes	no	None	II	no	yes	A	no	0	0	0	no
chr1	204227467	204227801	1.238	4.43	5.517	0.972	3.579	4.457	0.785	0.068	0.046	0.423	no	yes	no	no	yes	no	None	VIII	no	no	D	yes	3.75284	3.97218	1.05845	yes
chr1	204367628	204368143	4.573	6.318	3.598	2.505	1.381	0.787	0.548	0.253	0.623	0.046	no	no	yes	no	no	no	None	IV	no	no	G	yes	6.17272	6.20981	1.00601	yes
chr1	204396041	204396631	3.298	2.866	6.766	5.586	0.869	2.052	1.694	0.507	0.01	0.541	no	yes	no	no	no	no	None	V	no	no	H	no	0	0	0	no
chr1	204475154	204477465	2.937	5.08	4.563	5.06	1.73	1.554	1.723	0.013	0.432	0.298	yes	no	no	no	no	no	None	V	no	no	H	no	0	0	0	no
chr1	204547205	204548785	5.265	6.739	6.221	5.504	1.28	1.181	1.045	0.008	0.533	0.107	yes	no	no	no	no	no	None	II	no	no	F	no	0	0	0	no
chr1	204681221	204682069	2.411	4.348	5.86	3.176	1.804	2.431	1.318	0.119	0.024	0.62	no	yes	no	no	no	no	None	IV	no	yes	E	no	0	0	0	no
chr1	205030627	205031102	2.765	3.91	4.841	3.212	1.414	1.751	1.162	0.206	0.026	0.292	no	yes	no	no	no	no	None	VIII	no	no	H	yes	3.4242	10.1511	2.96452	yes
chr1	205294113	205294961	4.081	4.006	4.292	4.22	0.982	1.052	1.034	0.636	0.726	0.033	no	no	yes	no	no	no	None	V	no	no	F	yes	4.41445	8.39475	1.90165	no
chr1	205454347	205455017	2.75	4.382	5.324	3.646	1.594	1.936	1.326	0.031	0.043	0.73	yes	yes	no	no	no	no	None	V	no	no	H	yes	7.9382	5.17484	0.651891	yes
chr1	205462004	205463074	4.962	7.54	6.06	3.837	1.52	1.221	0.773	0.025	0.855	0.271	yes	no	no	no	no	no	None	IV	no	no	I	no	0	0	0	no
chr1	205497677	205500175	5.662	6.621	9.801	4.584	1.169	1.731	0.81	0.191	0.03	0.877	no	yes	no	no	no	no	None	II	no	no	H	yes	5.0388	7.94589	1.57694	no
chr1	205633529	205635151	6.069	5.453	8.356	5.103	0.899	1.377	0.841	0.006	0.032	0.286	yes	yes	no	no	no	no	None	II	no	no	F	no	0	0	0	no
chr1	205637424	205639493	4.982	5.325	6.482	5.403	1.069	1.301	1.085	0.118	0.01	0.978	no	yes	no	no	no	no	None	II	no	no	F	no	0	0	0	no
chr1	205888067	205888607	5.654	5.871	9.073	6.206	1.038	1.605	1.098	0.458	0.032	0.496	no	yes	no	no	no	no	None	II	no	no	F	no	0	0	0	yes
chr1	205901904	205904255	3.782	4.254	5.362	3.563	1.125	1.418	0.942	0.206	0.748	0.026	no	no	yes	no	no	no	None	V	no	no	F	no	0	0	0	no
chr1	206234421	206235114	4.013	5.271	5.925	3.797	1.314	1.476	0.946	0.008	0.026	0.115	yes	yes	no	no	no	no	None	IV	no	no	I	yes	6.82233	5.73759	0.841002	no
chr1	206237366	206241634	3.964	3.875	4.279	3.614	0.977	1.08	0.912	0.237	0.681	0.045	no	no	yes	no	no	no	None	V	no	no	F	no	0	0	0	no
chr1	206266037	206266937	2.739	3.131	5.276	4.387	1.143	1.926	1.602	0.798	0.025	0.275	no	yes	no	no	no	no	None	V	no	no	H	no	0	0	0	no
chr1	206275166	206275914	4.726	6.348	8.836	3.282	1.343	1.87	0.694	0.213	0.014	0.471	no	yes	no	no	no	no	None	IV	no	no	H	no	0	0	0	no
chr1	206325780	206330676	8.966	6.212	10.028	4.917	0.693	1.119	0.548	0.499	0.428	0.011	no	no	yes	no	no	no	None	II	no	no	G	no	0	0	0	no
chr1	206679192	206681316	7.203	16.796	11.52	7.865	2.332	1.599	1.092	0.211	0.05	0.383	no	yes	no	no	no	yes	RASSF5	VII	no	no	C	yes	3.117	6.27307	2.01253	no
chr1	206728507	206733312	5.981	8.657	11.903	6.124	1.447	1.99	1.024	0.018	0.523	0.74	yes	no	no	no	no	yes	RASSF5	IX	no	no	H	no	0	0	0	no
chr1	206746707	206747083	4.614	2.344	3.907	5.203	0.508	0.847	1.128	0.009	0.169	0.206	yes	no	no	no	no	no	None	V	no	no	G	no	0	0	0	no
chr1	206752738	206754581	11.949	25.562	17.956	13.503	2.139	1.503	1.13	0.121	0.109	0.025	no	no	yes	no	no	no	None	III	no	no	C	no	0	0	0	no
chr1	206872288	206874464	2.985	3.565	3.308	3.288	1.194	1.108	1.102	0.005	0.164	0.203	yes	no	no	no	no	no	None	VIII	no	no	F	no	0	0	0	no
chr1	206896838	206897935	4.489	6.871	5.811	3.144	1.531	1.295	0.7	0.095	0.023	0.323	no	yes	no	no	no	no	None	IV	no	no	I	no	0	0	0	no
chr1	206926476	206926857	3.296	0.871	1.067	1.559	0.264	0.324	0.473	0.012	0.241	0.896	yes	no	no	no	no	no	None	VIII	no	no	G	no	0	0	0	no
chr1	206939611	206940337	12.35	13.538	14.413	10.779	1.096	1.167	0.873	0.016	0.482	0.261	yes	no	no	no	no	no	None	VI	no	no	F	no	0	0	0	no
chr1	206943940	206946421	7.753	7.975	11.228	10.308	1.029	1.448	1.33	0.51	0.035	0.706	no	yes	no	no	no	yes	IL10	I	no	no	H	no	0	0	0	no
chr1	207008001	207008508	7.699	8.94	13.181	9.126	1.161	1.712	1.185	0.078	0.043	0.382	no	yes	no	no	no	no	None	I	no	no	H	no	0	0	0	no
chr1	207155503	207155853	4.795	5.564	5.926	5.16	1.16	1.236	1.076	0.715	0.036	0.394	no	yes	no	no	no	no	None	V	no	no	F	yes	6.8484	11.2292	1.63968	yes
chr1	207178159	207178653	5.382	6.119	4.222	7.005	1.137	0.784	1.302	0.822	0.362	0.045	no	no	yes	no	no	no	None	II	no	no	F	yes	7.33757	6.51277	0.887592	yes
chr1	207489989	207490522	5.485	5.522	7.336	6.998	1.007	1.337	1.276	0.293	0.023	0.05	no	yes	yes	no	no	no	None	II	no	no	F	no	0	0	0	no
chr1	207669126	207670065	4.065	7.92	8.192	6.051	1.948	2.015	1.489	0.024	0.202	0.88	yes	no	no	no	no	yes	CR1	II	no	no	C	no	0	0	0	no
chr1	207980355	207981787	7.311	7.978	13.415	11.054	1.091	1.835	1.512	0.632	0.002	0.278	no	yes	no	no	no	no	None	I	no	no	H	no	0	0	0	no
chr1	208343606	208343985	1.206	4.619	7.433	4.884	3.829	6.162	4.049	0.072	0.049	0.158	no	yes	no	yes	no	no	None	V	no	no	A	no	0	0	0	no
chr1	208418547	208418838	2	2.306	4.51	3.607	1.153	2.255	1.803	0.194	0.034	0.421	no	yes	no	yes	no	no	None	VIII	no	no	E	no	0	0	0	yes
chr1	208934155	208935440	4.477	2.812	3.987	5.283	0.628	0.891	1.18	0.072	0.397	0.035	no	no	yes	no	no	no	None	V	no	no	G	no	0	0	0	no
chr1	209380332	209381489	3.357	6.795	4.517	2.916	2.024	1.345	0.869	0.019	0.262	0.287	yes	no	no	no	no	no	None	IV	no	no	I	no	0	0	0	no
chr1	209750086	209750395	4.085	6.093	5.457	1.677	1.492	1.336	0.411	0.082	0.179	0.021	no	no	yes	no	no	no	None	IV	no	no	I	yes	3.43661	11.443	3.32974	yes
chr1	209785849	209786692	3.251	5.201	8.005	7.68	1.6	2.463	2.363	0.166	0.007	0.088	no	yes	no	no	no	no	None	II	no	yes	E	no	0	0	0	no
chr1	209799427	209801588	5.352	6.753	8.042	6.087	1.262	1.503	1.137	0.06	0.021	0.6	no	yes	no	no	no	no	None	II	no	no	H	yes	5.30102	8.11558	1.53095	no
chr1	209846497	209849623	5.915	8.223	8.248	6.445	1.39	1.395	1.09	0.184	0.036	0.19	no	yes	no	no	no	yes	G0S2	IX	no	no	I	no	0	0	0	no
chr1	209928414	209930890	9.712	11.994	19.317	12.03	1.235	1.989	1.239	0.167	0.017	0.17	no	yes	no	no	no	yes	TRAF3IP3	VI	no	no	H	no	0	0	0	no
chr1	209939351	209939839	2.432	1.376	5.467	4.561	0.566	2.248	1.875	0.723	0.047	0.322	no	yes	no	no	no	no	None	V	no	no	E	no	0	0	0	no
chr1	209940991	209943737	9.845	13.957	18.525	11.632	1.418	1.882	1.182	0.062	0.044	0.511	no	yes	no	no	no	no	None	VI	no	no	H	no	0	0	0	no
chr1	210000956	210001847	6.245	14.587	12.104	10.269	2.336	1.938	1.644	0.031	0.004	0.203	yes	yes	no	no	no	yes	DIEXF	VII	no	no	C	yes	5.30102	9.05497	1.70816	no
chr1	210573897	210574302	3.455	5.661	9.143	3.637	1.638	2.646	1.053	0.622	0.041	0.23	no	yes	no	no	no	no	None	IV	no	no	C	yes	4.12404	4.85488	1.17721	no
chr1	211689830	211692533	3.664	4.83	4.796	3.026	1.318	1.309	0.826	0.038	0.105	0.577	yes	no	no	no	no	no	None	V	no	no	F	no	0	0	0	no
chr1	211725005	211725939	6.129	7.499	9.771	7.941	1.223	1.594	1.296	0.041	0.079	0.943	yes	no	no	no	no	no	None	IX	no	no	H	no	0	0	0	no
chr1	211763473	211763848	3.329	5.833	7.521	5.498	1.752	2.259	1.651	0.031	0.003	0.526	yes	yes	no	no	no	no	None	II	no	no	E	no	0	0	0	no
chr1	211868258	211869118	9.773	12.95	14.177	9.766	1.325	1.451	0.999	0.068	0.009	0.871	no	yes	no	no	no	no	None	VII	no	no	I	no	0	0	0	no
chr1	212081793	212083480	5.088	1.405	3.261	4.455	0.276	0.641	0.875	0.028	0.81	0.728	yes	no	no	no	no	no	None	V	no	no	G	no	0	0	0	no
chr1	212105279	212110229	4.748	6.392	8.884	7.248	1.346	1.871	1.527	0.126	0	0.013	no	yes	yes	no	no	no	None	II	yes	no	H	no	0	0	0	no
chr1	212583575	212584797	4.503	4.843	5.243	4.747	1.076	1.164	1.054	0.772	0.747	0.039	no	no	yes	no	no	no	None	V	no	no	F	no	0	0	0	no
chr1	212601867	212602591	4.497	2.619	1.615	3.154	0.582	0.359	0.701	0.204	0.01	0.15	no	yes	no	no	no	no	None	VIII	no	no	G	no	0	0	0	no
chr1	212630888	212632498	4.826	6.646	8.205	6.69	1.377	1.7	1.386	0.024	0.24	0.537	yes	no	no	no	no	no	None	II	no	no	H	yes	3.42199	6.89435	2.01472	no
chr1	212658822	212659801	8.069	11.72	12.486	6.559	1.453	1.547	0.813	0.072	0.2	0.035	no	no	yes	no	no	no	None	I	no	no	I	no	0	0	0	no
chr1	212947880	212948435	7.64	6.01	7.228	6.256	0.787	0.946	0.819	0.443	0.824	0.018	no	no	yes	no	no	no	None	II	no	no	G	no	0	0	0	no
chr1	213128680	213129693	4.162	6.431	5.422	4.419	1.545	1.303	1.062	0.027	0.12	0.532	yes	no	no	no	no	no	None	IV	no	no	I	no	0	0	0	no
chr1	213796022	213796586	1.507	7.228	4.825	4.301	4.797	3.202	2.854	0.038	0.267	0.187	yes	no	no	yes	no	no	None	IV	no	no	D	no	0	0	0	no
chr1	214412919	214413694	4.079	4.464	4.854	2.535	1.094	1.19	0.622	0.33	0.02	0.23	no	yes	no	no	no	no	None	V	no	no	F	no	0	0	0	no
chr1	214502133	214502940	4.955	7.176	11.579	5.612	1.448	2.337	1.132	0.174	0.044	0.885	no	yes	no	no	no	no	None	II	no	no	H	yes	3.19131	12.055	3.77744	yes
chr1	214723968	214726287	3.754	5.59	6.332	3.851	1.489	1.687	1.026	0.124	0.007	0.212	no	yes	no	no	no	yes	PTPN14	IV	no	no	H	no	0	0	0	no
chr1	216037094	216037561	4.363	5.53	4.503	4.627	1.268	1.032	1.061	0.014	0.116	0.866	yes	no	no	no	no	no	None	V	no	no	F	no	0	0	0	no
chr1	216708453	216708803	4.488	1.702	1.385	3.602	0.379	0.309	0.802	0.011	0.192	0.204	yes	no	no	no	no	no	None	VIII	no	no	G	no	0	0	0	no
chr1	217411227	217412150	3.683	6.288	7.795	6.812	1.707	2.116	1.849	0.277	0.043	0.285	no	yes	no	no	no	no	None	II	no	no	E	no	0	0	0	no
chr1	217506806	217507706	3.818	2.314	5.535	2.985	0.606	1.45	0.782	0.043	0.181	0.081	yes	no	no	no	no	no	None	VIII	no	no	F	yes	4.49518	6.62029	1.47275	no
chr1	218061177	218061558	0.927	1.886	3.159	0.992	2.034	3.406	1.07	0.423	0.02	0.423	no	yes	no	yes	no	no	None	VIII	no	no	C	no	0	0	0	no
chr1	218635370	218637530	4.323	6.072	4.73	4.407	1.405	1.094	1.02	0.026	0.339	0.392	yes	no	no	no	no	no	None	V	no	no	F	no	0	0	0	no
chr1	218646893	218647983	4.562	3.062	5.986	6.415	0.671	1.312	1.406	0.203	0.014	0.11	no	yes	no	no	no	no	None	V	no	no	F	no	0	0	0	no
chr1	218702875	218703374	3.477	2.97	3.877	5.784	0.854	1.115	1.664	0.34	0.136	0.044	no	no	yes	no	no	no	None	VIII	no	no	F	no	0	0	0	no
chr1	218927820	218929435	6.971	5.003	5.799	5.719	0.718	0.832	0.82	0.034	0.611	0.092	yes	no	no	no	no	no	None	II	no	no	G	no	0	0	0	no
chr1	219498432	219498773	4.081	2.6	2.148	1.098	0.637	0.526	0.269	0.329	0.44	0.039	no	no	yes	yes	no	no	None	VIII	no	no	G	no	0	0	0	no
chr1	219799328	219800331	1.027	1.376	4.077	2.136	1.34	3.97	2.08	0.423	0.004	0.176	no	yes	no	yes	no	no	None	VIII	no	no	E	no	0	0	0	no
chr1	219833036	219834860	5.586	5.943	7.272	5.843	1.064	1.302	1.046	0.723	0.011	0.559	no	yes	no	no	no	no	None	II	no	no	F	yes	4.18882	9.98721	2.38425	no
chr1	219905201	219907519	9.843	7.378	7.137	6.355	0.75	0.725	0.646	0.064	0.424	0.033	no	no	yes	no	no	no	None	II	no	no	G	no	0	0	0	no
chr1	220473543	220474243	4.111	4.745	10.305	8.51	1.154	2.507	2.07	0.688	0.005	0.114	no	yes	no	no	no	no	None	II	no	no	E	no	0	0	0	no
chr1	220498163	220500253	5.929	8.348	6.607	5.834	1.408	1.114	0.984	0.014	0.778	0.044	yes	no	yes	no	no	no	None	II	no	no	F	no	0	0	0	no
chr1	220517089	220517381	3.635	4.471	5.707	3.698	1.23	1.57	1.017	0.664	0.031	0.247	no	yes	no	no	no	no	None	V	no	no	H	no	0	0	0	no
chr1	220883424	220884008	4.791	3.863	4.386	1.515	0.806	0.915	0.316	0.318	0.566	0.032	no	no	yes	no	no	no	None	VIII	no	no	G	no	0	0	0	no
chr1	220884455	220886138	11.625	13.576	13.64	13.363	1.168	1.173	1.149	0.006	0.518	0.293	yes	no	no	no	no	no	None	VI	no	no	F	no	0	0	0	no
chr1	220928665	220929839	4.15	5.413	3.743	2.944	1.304	0.902	0.709	0.043	0.966	0.384	yes	no	no	no	no	no	None	IV	no	no	G	no	0	0	0	no
chr1	220949911	220952224	8.595	11.074	12.326	9.697	1.289	1.434	1.128	0.129	0.039	0.896	no	yes	no	no	no	no	None	I	no	no	H	yes	5.94054	7.09328	1.19405	no
chr1	220976735	220977723	6.919	4.531	6.506	6.633	0.655	0.94	0.959	0.144	0.043	0.286	no	yes	no	no	no	no	None	II	no	no	G	no	0	0	0	yes
chr1	220986355	220987463	3.41	1.306	2.49	1.153	0.383	0.73	0.338	0	0.036	0	yes	yes	yes	no	no	no	None	VIII	no	no	G	no	0	0	0	no
chr1	221087760	221088919	5.845	4.471	7.9	6.371	0.765	1.352	1.09	0.33	0.021	0.297	no	yes	no	no	no	no	None	II	no	no	F	no	0	0	0	no
chr1	221196115	221200525	4.166	3.792	4.223	3.619	0.91	1.014	0.869	0.118	0.574	0.022	no	no	yes	no	no	no	None	V	no	no	F	no	0	0	0	no
chr1	221249008	221249756	5.283	4.496	4.525	3.918	0.851	0.857	0.742	0.011	0.59	0.075	yes	no	no	no	no	no	None	V	no	no	G	no	0	0	0	no
chr1	221988778	221989432	4.194	1.083	3.102	1.076	0.258	0.74	0.257	0.007	0.309	0.188	yes	no	no	yes	no	no	None	VIII	no	no	G	no	0	0	0	no
chr1	222269141	222269862	4.597	3.658	6.295	5.086	0.796	1.369	1.106	0.259	0.021	0.671	no	yes	no	yes	no	no	None	V	no	no	F	yes	3.38713	9.31471	2.75003	no
chr1	222625943	222629916	4.098	5.648	5.993	4.651	1.378	1.462	1.135	0.017	0.078	0.996	yes	no	no	no	no	no	None	V	no	yes	H	yes	4.16509	9.65971	2.31921	no
chr1	223352922	223355889	3.978	4.414	5.395	4.206	1.11	1.356	1.057	0.352	0.047	0.849	no	yes	no	no	no	no	None	V	no	no	F	no	0	0	0	no
chr1	223723439	223724582	3.528	3.947	3.608	3.848	1.119	1.023	1.091	0.129	0.572	0.044	no	no	yes	no	no	no	None	VIII	no	no	F	no	0	0	0	no
chr1	223892004	223893099	2.887	3.613	3.183	2.431	1.251	1.102	0.842	0.503	0.024	0.64	no	yes	no	no	no	no	None	VIII	no	no	F	no	0	0	0	no
chr1	223939691	223941845	4.119	3.238	2.957	0.819	0.786	0.718	0.199	0.079	0.448	0.003	no	no	yes	no	no	no	None	VIII	no	no	G	no	0	0	0	no
chr1	223945866	223950427	4.733	5.067	4.703	5.93	1.071	0.994	1.253	0.158	0.915	0.039	no	no	yes	no	no	no	None	V	no	no	F	no	0	0	0	no
chr1	223952558	223954172	3.3	3.574	2.513	1.153	1.083	0.761	0.349	0.249	0.373	0.001	no	no	yes	no	no	no	None	VIII	no	no	G	no	0	0	0	no
chr1	224564553	224567097	7.753	7.283	8.279	6.877	0.939	1.068	0.887	0.206	0.06	0.001	no	no	yes	no	no	no	None	IX	no	no	F	no	0	0	0	no
chr1	224697025	224699089	6.687	5.177	6.203	4.654	0.774	0.928	0.696	0.178	0.872	0.048	no	no	yes	no	no	no	None	V	no	no	G	no	0	0	0	no
chr1	224701381	224701907	13.516	15.975	14.791	10.18	1.182	1.094	0.753	0.236	0.408	0.036	no	no	yes	no	no	no	None	VI	no	no	F	yes	3.65065	5.15638	1.41246	yes
chr1	224759475	224760075	3.768	3.295	3.187	4.321	0.874	0.846	1.147	0.377	0.05	0.73	no	yes	no	no	no	no	None	VIII	no	yes	G	no	0	0	0	no
chr1	225378704	225381127	0.906	1.096	2.354	1.092	1.209	2.598	1.206	0.423	0.047	0.423	no	yes	no	no	no	no	None	VIII	no	no	H	no	0	0	0	no
chr1	225609534	225610542	3.86	4.227	4.363	3.722	1.095	1.13	0.964	0.605	0.045	0.111	no	yes	no	yes	no	no	None	V	no	no	F	no	0	0	0	no
chr1	225628904	225629965	3.982	2.686	4.429	1.334	0.674	1.112	0.335	0.218	0.92	0.006	no	no	yes	yes	no	no	None	VIII	no	no	G	no	0	0	0	yes
chr1	226073045	226073452	4.76	7.429	7.757	7.375	1.561	1.63	1.549	0.504	0.159	0.023	no	no	yes	no	no	no	None	II	no	no	H	no	0	0	0	no
chr1	226104791	226106496	3.528	1.306	2.609	3.562	0.37	0.74	1.01	0.003	0.362	0.85	yes	no	no	no	no	no	None	VIII	no	no	G	no	0	0	0	no
chr1	226107581	226112872	8.614	8.746	10.324	6.856	1.015	1.199	0.796	0.521	0.018	0.114	no	yes	no	no	no	yes	PYCR2	IX	no	no	F	no	0	0	0	no
chr1	226213192	226214212	6.789	10.658	9.139	8.76	1.57	1.346	1.29	0.095	0.046	0.404	no	yes	no	no	no	no	None	IX	no	no	I	no	0	0	0	no
chr1	226219886	226220849	4.037	5.097	5.671	3.95	1.263	1.405	0.978	0.04	0.111	0.957	yes	no	no	no	no	no	None	V	no	no	F	no	0	0	0	no
chr1	226221197	226222689	7.744	7.922	7.522	6.766	1.023	0.971	0.874	0.364	0.129	0.01	no	no	yes	no	no	no	None	IX	no	no	F	no	0	0	0	no
chr1	226280540	226282557	4.842	6.854	5.412	6.876	1.416	1.118	1.42	0.008	0.307	0.223	yes	no	no	no	no	no	None	II	no	no	H	no	0	0	0	no
chr1	226312652	226313993	11.628	18.13	16.425	10.721	1.559	1.413	0.922	0.177	0.002	0.881	no	yes	no	no	no	no	None	VI	no	no	I	yes	3.50685	10.0369	2.86209	no
chr1	226536154	226538635	4.53	8.251	6.576	6.711	1.821	1.452	1.481	0.041	0.088	0.644	yes	no	no	no	no	no	None	II	no	no	I	no	0	0	0	no
chr1	226559058	226562261	2.031	2.844	3.791	2.387	1.4	1.867	1.175	0.003	0.213	0.406	yes	no	no	no	no	no	None	VIII	no	no	H	no	0	0	0	no
chr1	226661606	226663393	4.058	4.888	5.897	3.702	1.204	1.453	0.912	0.019	0.019	0.175	yes	yes	no	no	no	no	None	V	no	no	F	no	0	0	0	no
chr1	226744845	226747394	3.47	5.609	6.019	4.311	1.616	1.735	1.242	0.087	0.014	0.354	no	yes	no	no	no	no	None	IV	no	no	H	no	0	0	0	no
chr1	226755767	226756730	5.068	7.518	6.204	2.059	1.483	1.224	0.406	0.229	0.196	0.016	no	no	yes	no	no	no	None	IV	no	no	I	yes	8.95999	5.41233	0.604055	no
chr1	226849615	226852733	4.537	5.75	6.347	4.035	1.267	1.399	0.889	0.038	0.191	0.197	yes	no	no	no	no	no	None	IV	no	no	F	no	0	0	0	no
chr1	226862423	226864420	8.299	14.622	13.394	16.019	1.762	1.614	1.93	0.045	0.185	0.052	yes	no	no	no	no	no	None	VII	no	no	E	no	0	0	0	no
chr1	226890181	226892485	10.404	21.024	12.501	6.625	2.021	1.202	0.637	0.215	0.461	0.026	no	no	yes	no	no	no	None	VII	no	no	I	no	0	0	0	no
chr1	226904229	226905750	16.618	22.858	22.176	15.078	1.375	1.334	0.907	0.19	0.983	0.039	no	no	yes	no	no	no	None	III	no	no	I	no	0	0	0	no
chr1	226914065	226915309	4.019	2.674	2.745	2.305	0.665	0.683	0.574	0.044	0.173	0.221	yes	no	no	no	no	no	None	VIII	no	no	G	no	0	0	0	no
chr1	227079217	227080722	6.422	7.139	3.059	2.859	1.112	0.476	0.445	0.139	0.123	0.027	no	no	yes	no	no	no	None	IV	no	no	G	no	0	0	0	no
chr1	227190089	227190689	4.369	2.243	3.111	1.334	0.513	0.712	0.305	0.22	0.341	0.011	no	no	yes	no	no	no	None	VIII	no	no	G	no	0	0	0	no
chr1	228191271	228193174	3.9	4.594	6.06	2.941	1.178	1.554	0.754	0.14	0.001	0.575	no	yes	no	no	no	no	None	IV	no	no	F	yes	5.21708	11.0919	2.12607	no
chr1	228268903	228273878	7.244	10.798	9.415	8.648	1.491	1.3	1.194	0.128	0.03	0.874	no	yes	no	no	no	yes	ARF1	IX	no	no	I	no	0	0	0	no
chr1	228323267	228324144	5.128	4.953	5.107	5.126	0.966	0.996	1	0.175	0.047	0.378	no	yes	no	no	no	no	None	V	no	no	F	no	0	0	0	no
chr1	228326079	228326760	5.547	5.481	5.965	5.046	0.988	1.075	0.91	0.618	0.455	0.018	no	no	yes	no	no	no	None	II	no	no	F	no	0	0	0	no
chr1	228462854	228464899	10.959	17.147	15.468	12.204	1.565	1.411	1.114	0.081	0.014	0.492	no	yes	no	no	no	no	None	VI	no	yes	I	no	0	0	0	no
chr1	228591667	228598790	7.06	9.369	10.105	6.881	1.327	1.431	0.975	0.106	0.017	0.298	no	yes	no	no	no	yes	TRIM11	IX	no	no	I	no	0	0	0	no
chr1	228800186	228800960	3.16	5.701	7.922	4.623	1.804	2.507	1.463	0.002	0.122	0.482	yes	no	no	no	no	no	None	IV	no	no	E	yes	3.16608	5.28287	1.66858	no
chr1	228803151	228805254	10.752	7.787	18.275	7.631	0.724	1.7	0.71	0.021	0.024	0.286	yes	yes	no	no	no	no	None	I	no	no	G	no	0	0	0	no
chr1	228932364	228933264	5.418	5.806	8.466	8.314	1.072	1.563	1.534	0.326	0.069	0.019	no	no	yes	no	no	no	None	II	no	no	H	no	0	0	0	no
chr1	229096231	229097603	4.161	5.954	6.803	4.523	1.431	1.635	1.087	0.231	0.003	0.623	no	yes	no	no	no	no	None	IV	no	no	H	no	0	0	0	no
chr1	229180925	229182855	3.216	3.385	4.057	3.507	1.053	1.262	1.09	0.024	0.152	0.071	yes	no	no	no	yes	no	None	VIII	no	no	F	no	0	0	0	no
chr1	229205359	229209198	3.364	5.047	4.783	4.611	1.5	1.422	1.37	0.049	0.054	0.098	yes	no	no	no	yes	no	None	V	no	no	H	no	0	0	0	no
chr1	229258772	229260808	2.878	3.364	4.067	2.794	1.169	1.413	0.971	0.019	0.333	0.642	yes	no	no	no	yes	no	None	VIII	no	no	F	no	0	0	0	no
chr1	229277507	229278686	3.259	2.56	4.259	2.535	0.786	1.307	0.778	0.249	0.053	0.044	no	no	yes	no	yes	no	None	VIII	no	no	F	no	0	0	0	no
chr1	229335103	229336990	6.473	9.139	8.935	6.751	1.412	1.38	1.043	0.07	0.571	0.044	no	no	yes	no	yes	no	None	IX	no	no	I	no	0	0	0	no
chr1	229362552	229363648	9.439	13.912	12.826	8.706	1.474	1.359	0.922	0.043	0.069	0.261	yes	no	no	no	yes	no	None	VII	no	no	I	yes	3.79717	5.5049	1.44974	no
chr1	229461049	229463176	2.796	4.128	4.338	4.393	1.477	1.552	1.571	0.238	0.25	0.039	no	no	yes	no	yes	no	None	V	no	no	H	no	0	0	0	no
chr1	229533552	229534003	3.902	2.3	0.941	1.153	0.589	0.241	0.295	0.167	0.096	0.013	no	no	yes	no	yes	no	None	VIII	no	no	G	no	0	0	0	no
chr1	229543712	229548088	8.985	10.996	8.914	7.207	1.224	0.992	0.802	0.036	0.007	0.201	yes	yes	no	no	yes	no	None	IX	no	no	F	no	0	0	0	no
chr1	229701172	229703796	5.469	6.105	8.174	4.109	1.116	1.494	0.751	0.708	0.011	0.042	no	yes	yes	no	yes	no	None	II	no	no	F	no	0	0	0	no
chr1	229722243	229722648	4.138	1.374	2.541	1.061	0.332	0.614	0.256	0.004	0.934	0.066	yes	no	no	no	yes	no	None	VIII	no	no	G	no	0	0	0	no
chr1	229760453	229763143	10.549	20.641	17.56	11.544	1.957	1.665	1.094	0.124	0.01	0.052	no	yes	no	no	no	yes	TAF5L	VI	no	no	C	no	0	0	0	no
chr1	229796251	229798038	8.733	11.614	13.72	8.595	1.33	1.571	0.984	0.032	0.035	0.846	yes	yes	no	no	no	no	None	VII	no	no	H	yes	6.62839	5.86482	0.884803	no
chr1	229974699	229975548	4.702	2.93	1.235	3.107	0.623	0.263	0.661	0.279	0.125	0.049	no	no	yes	no	no	no	None	VIII	no	no	G	no	0	0	0	no
chr1	229977001	229977725	5.367	4.443	10.711	4.844	0.828	1.996	0.903	0.152	0.049	0.339	no	yes	no	no	no	no	None	II	no	no	F	no	0	0	0	no
chr1	230131826	230132446	3.377	1.513	4.192	3.341	0.448	1.241	0.989	0.004	0.809	0.815	yes	no	no	no	no	no	None	VIII	no	no	F	no	0	0	0	no
chr1	230290689	230292563	3.616	2.808	1.343	1.299	0.777	0.372	0.359	0.524	0.593	0.002	no	no	yes	no	no	no	None	VIII	no	no	G	no	0	0	0	no
chr1	230322550	230323681	4.256	6.412	6.865	6.846	1.507	1.613	1.609	0.035	0.129	0.12	yes	no	no	no	no	no	None	II	no	yes	H	no	0	0	0	no
chr1	230326172	230328393	11.296	10.692	8.774	9	0.947	0.777	0.797	0.004	0.872	0.004	yes	no	yes	no	no	no	None	I	no	no	G	no	0	0	0	no
chr1	230434902	230435954	3.624	4.24	3.213	1.878	1.17	0.887	0.518	0.3	0.152	0.002	no	no	yes	no	no	no	None	VIII	no	no	G	no	0	0	0	no
chr1	230527777	230529283	5.992	6.129	6.854	7.969	1.023	1.144	1.33	0.634	0.991	0.001	no	no	yes	no	no	no	None	II	no	no	F	no	0	0	0	no
chr1	230706552	230710295	8.37	8.893	9.387	9.675	1.063	1.122	1.156	0.578	0.036	0.052	no	yes	no	no	no	no	None	I	no	no	F	no	0	0	0	no
chr1	230777035	230780824	10.743	14.896	11.714	7.432	1.387	1.09	0.692	0.182	0.344	0.024	no	no	yes	no	no	yes	COG2	VII	no	no	F	yes	3.82963	16.0205	4.18331	no
chr1	230843002	230846354	11.246	13.276	9.204	16.292	1.181	0.818	1.449	0.263	0.031	0.684	no	yes	no	no	no	no	None	VII	no	no	F	no	0	0	0	no
chr1	230887804	230891080	2.233	5.064	5.004	2.952	2.268	2.241	1.322	0.01	0.218	0.296	yes	no	no	no	no	no	None	IV	no	no	C	no	0	0	0	no
chr1	231157171	231157572	4.369	2.684	3.582	1.153	0.614	0.82	0.264	0.776	0.199	0.011	no	no	yes	no	no	no	None	VIII	no	no	G	no	0	0	0	no
chr1	231378361	231379605	3.449	0.988	2.473	2.598	0.286	0.717	0.753	0.012	0.256	0.239	yes	no	no	no	no	no	None	VIII	no	no	G	no	0	0	0	no
chr1	231413185	231415728	4.693	3.74	4.169	3.709	0.797	0.888	0.79	0.099	0.18	0.031	no	no	yes	no	no	no	None	V	no	no	G	no	0	0	0	no
chr1	231547920	231551603	2.627	4.944	5.408	3.783	1.882	2.058	1.44	0.038	0.061	0.344	yes	no	no	no	no	no	None	V	no	no	C	no	0	0	0	no
chr1	231738702	231740188	3.114	2.162	4.678	4.106	0.694	1.502	1.319	0.251	0.01	0.504	no	yes	no	no	no	no	None	VIII	no	no	H	yes	3.11171	8.96972	2.88257	no
chr1	231745744	231751083	5.292	5.531	6.561	6.531	1.045	1.24	1.234	0.749	0.023	0.088	no	yes	no	no	no	yes	LINC00582	II	no	no	F	no	0	0	0	no
chr1	231761465	231765694	8.909	12.781	13.888	11.42	1.435	1.559	1.282	0.17	0.1	0.023	no	no	yes	no	no	yes	DISC1	VII	no	no	H	no	0	0	0	no
chr1	231804528	231805012	1.243	1.413	2.628	1.847	1.137	2.115	1.487	0.423	0.036	0.318	no	yes	no	no	no	no	None	VIII	no	no	H	no	0	0	0	no
chr1	231912104	231915308	8.084	11.377	10.368	11.634	1.407	1.282	1.439	0.027	0.087	0.18	yes	no	no	no	no	no	None	I	no	no	H	no	0	0	0	no
chr1	232282468	232283972	4.013	1.098	1.869	3.341	0.274	0.466	0.833	0.009	0.086	0.099	yes	no	no	yes	yes	no	None	VIII	no	no	G	no	0	0	0	no
chr1	232309470	232310736	7.774	7.454	7.577	5.571	0.959	0.975	0.717	0.485	0.213	0.029	no	no	yes	yes	yes	no	None	II	no	no	G	no	0	0	0	no
chr1	232315173	232317870	3.377	2.108	4.053	1.153	0.624	1.2	0.341	0.307	0.005	0.004	no	yes	yes	yes	yes	no	None	VIII	no	no	G	no	0	0	0	no
chr1	232558623	232560886	4.001	3.621	3.838	4.572	0.905	0.959	1.143	0.386	0.7	0.03	no	no	yes	yes	yes	no	None	V	no	no	F	no	0	0	0	no
chr1	232591912	232593018	7.498	6.112	6.95	5.977	0.815	0.927	0.797	0.303	0.005	0.104	no	yes	no	yes	yes	no	None	II	no	no	G	no	0	0	0	no
chr1	232593349	232594555	5.718	4.633	6.269	6.936	0.81	1.096	1.213	0.369	0.049	0.623	no	yes	no	yes	yes	no	None	II	no	no	F	no	0	0	0	no
chr1	232598794	232601140	3.559	2.021	2.426	0.972	0.568	0.682	0.273	0.142	0.937	0.012	no	no	yes	yes	yes	no	None	VIII	no	no	G	no	0	0	0	no
chr1	232666990	232668907	3.44	1.191	2.349	0.868	0.346	0.683	0.252	0.306	0.823	0.035	no	no	yes	yes	yes	no	None	VIII	no	no	G	no	0	0	0	no
chr1	232755983	232757452	4.779	8.698	11.151	7.351	1.82	2.333	1.538	0.125	0.004	0.006	no	yes	yes	yes	yes	no	None	IX	no	no	E	no	0	0	0	no
chr1	232792290	232794242	3.91	3.9	5.027	4.976	0.997	1.286	1.273	0.452	0.08	0.045	no	no	yes	yes	yes	no	None	V	no	no	F	no	0	0	0	no
chr1	232855727	232857526	5.732	6.722	7.458	8.275	1.173	1.301	1.444	0.139	0.024	0.103	no	yes	no	yes	no	no	None	II	no	no	F	no	0	0	0	no
chr1	232922566	232923546	4.28	2.579	2.554	1.515	0.603	0.597	0.354	0.707	0.232	0.002	no	no	yes	yes	no	no	None	VIII	no	no	G	no	0	0	0	no
chr1	233178602	233179099	5.747	5.227	3.584	5.419	0.91	0.624	0.943	0.017	0.335	0.657	yes	no	no	yes	no	no	None	V	no	no	G	no	0	0	0	no
chr1	233222506	233223439	4.199	2.438	3.706	1.114	0.581	0.882	0.265	0.233	0.332	0.014	no	no	yes	yes	no	no	None	VIII	no	no	G	no	0	0	0	no
chr1	233247722	233252034	3.906	5.301	5.704	4.686	1.357	1.46	1.2	0.013	0.141	0.255	yes	no	no	yes	no	no	None	V	no	no	H	no	0	0	0	no
chr1	233850355	233851455	3.542	1.409	1.371	0.958	0.398	0.387	0.27	0.293	0.001	0.2	no	yes	no	no	no	no	None	VIII	no	no	G	no	0	0	0	no
chr1	233994941	233996143	9.865	8.852	14.971	10.256	0.897	1.518	1.04	0.597	0.004	0.617	no	yes	no	no	no	no	None	I	no	no	F	no	0	0	0	no
chr1	234039819	234041564	5.375	6.456	5.557	4.281	1.201	1.034	0.796	0.29	0.008	0.152	no	yes	no	no	no	yes	SLC35F3	IV	no	no	F	no	0	0	0	no
chr1	234247261	234247877	5.354	7.892	10.546	6.419	1.474	1.97	1.199	0.33	0.033	0.818	no	yes	no	no	no	no	None	IX	no	no	H	no	0	0	0	no
chr1	234397519	234399191	3.545	3.844	3.62	1.118	1.084	1.021	0.315	0.031	0.127	0.351	yes	no	no	no	no	no	None	VIII	no	no	F	no	0	0	0	no
chr1	234437741	234439633	8.241	8.07	10.534	8.695	0.979	1.278	1.055	0.577	0.013	0.447	no	yes	no	no	no	no	None	I	no	no	F	no	0	0	0	no
chr1	234647739	234649076	7.302	13.716	11.685	9.293	1.878	1.6	1.273	0.023	0.009	0.257	yes	yes	no	no	no	no	None	VII	no	no	H	no	0	0	0	no
chr1	234729484	234730538	3.384	1.098	3.896	1.017	0.324	1.151	0.3	0.003	0.078	0.003	yes	no	yes	no	yes	no	None	VIII	no	no	G	no	0	0	0	no
chr1	234764156	234766958	3.555	4.107	4.258	1.147	1.155	1.198	0.323	0.142	0.024	0.286	no	yes	no	no	yes	yes	LINC00184	VIII	no	no	F	no	0	0	0	no
chr1	234796966	234797885	3.092	2.457	4.116	1.243	0.795	1.331	0.402	0.203	0.135	0.004	no	no	yes	no	yes	no	None	VIII	no	no	G	no	0	0	0	no
chr1	234838904	234842322	3.681	3.685	3.948	3.141	1.001	1.072	0.853	0.739	0.384	0.007	no	no	yes	no	yes	no	None	VIII	no	no	F	no	0	0	0	no
chr1	234842671	234844034	6.818	7.488	8.015	5.45	1.098	1.175	0.799	0.558	0.623	0.011	no	no	yes	no	yes	no	None	II	no	no	F	no	0	0	0	no
chr1	234850633	234851690	3.982	0.887	4.474	1.038	0.223	1.124	0.261	0.003	0.414	0.203	yes	no	no	no	yes	no	None	VIII	no	no	G	no	0	0	0	no
chr1	234876868	234877411	2.824	2.632	3.613	1.153	0.932	1.28	0.408	0.012	0.124	0.004	yes	no	yes	no	yes	no	None	VIII	no	no	F	no	0	0	0	no
chr1	234893975	234897540	4.17	4.177	5.432	4.33	1.002	1.303	1.038	0.927	0.004	0.13	no	yes	no	no	yes	no	None	V	no	no	F	no	0	0	0	no
chr1	234898931	234900719	4.233	4.27	4.674	3.863	1.009	1.104	0.913	0.37	0.118	0.048	no	no	yes	no	yes	no	None	V	no	no	F	no	0	0	0	no
chr1	234967537	234973237	3.475	4.076	4.308	4.38	1.173	1.24	1.261	0.668	0.23	0.005	no	no	yes	no	yes	no	None	V	no	no	F	no	0	0	0	no
chr1	235037061	235038268	3.949	3.529	2.99	0.972	0.894	0.757	0.246	0.78	0.552	0.038	no	no	yes	no	yes	no	None	VIII	no	no	G	no	0	0	0	no
chr1	235047277	235061149	4.051	4.762	4.483	4.078	1.176	1.107	1.007	0.034	0.255	0.823	yes	no	no	no	yes	no	None	V	no	no	F	no	0	0	0	no
chr1	235140164	235149731	3.857	4.72	4.905	4.132	1.224	1.272	1.071	0.153	0.039	0.987	no	yes	no	no	yes	no	None	V	no	no	F	no	0	0	0	no
chr1	235180309	235181803	3.39	4.188	5.963	2.727	1.235	1.759	0.804	0.509	0.045	0.93	no	yes	no	no	yes	no	None	IV	no	no	H	no	0	0	0	no
chr1	235248177	235249612	3.651	4.621	4.121	3.978	1.266	1.129	1.09	0.049	0.307	0.19	yes	no	no	no	yes	no	None	V	no	no	F	no	0	0	0	no
chr1	235256284	235258563	4.828	11.167	7.436	6.234	2.313	1.54	1.291	0.049	0.132	0.684	yes	no	no	no	yes	no	None	II	no	no	C	no	0	0	0	yes
chr1	235468505	235468857	4.842	3.656	2.196	2.367	0.755	0.453	0.489	0.226	0.041	0.137	no	yes	no	no	no	no	None	VIII	no	no	G	no	0	0	0	no
chr1	235665672	235669740	10.927	18.022	17.925	13.623	1.649	1.64	1.247	0	0.669	0.041	yes	no	yes	no	no	yes	B3GALNT2	VI	no	no	H	no	0	0	0	no
chr1	235761345	235761753	4.616	2.852	5.674	2.683	0.618	1.229	0.581	0.272	0.031	0.148	no	yes	no	no	no	no	None	VIII	no	yes	G	no	0	0	0	no
chr1	235795195	235797894	5.619	4.372	4.452	4.587	0.778	0.792	0.816	0.027	0.02	0.052	yes	yes	no	no	no	no	None	V	no	no	G	no	0	0	0	no
chr1	235847038	235848449	3.565	3.734	3.753	3.632	1.047	1.053	1.019	0.102	0.024	0.737	no	yes	no	no	no	no	None	VIII	no	no	F	no	0	0	0	no
chr1	235916222	235918355	5.896	8.177	10.824	8.666	1.387	1.836	1.47	0.117	0.013	0.785	no	yes	no	no	no	no	None	IX	yes	no	H	no	0	0	0	no
chr1	235999379	236001947	3.94	1.103	2.159	1.14	0.28	0.548	0.289	0.157	0.121	0.002	no	no	yes	no	no	no	None	VIII	no	no	G	no	0	0	0	no
chr1	236093673	236097502	6.342	6.797	8.383	6.069	1.072	1.322	0.957	0.023	0.026	0.26	yes	yes	no	no	no	no	None	II	no	no	F	no	0	0	0	no
chr1	236113346	236115520	3.676	4.023	4.782	3.441	1.095	1.301	0.936	0.755	0.002	0.398	no	yes	no	no	no	no	None	V	no	no	F	no	0	0	0	no
chr1	236120056	236124671	3.983	4.359	6.075	4.323	1.094	1.525	1.085	0.107	0.038	0.525	no	yes	no	no	no	no	None	V	no	no	F	no	0	0	0	no
chr1	236158817	236160858	7.39	7.056	9.1	6.277	0.955	1.231	0.849	0.34	0.972	0.037	no	no	yes	no	no	no	None	IX	no	no	F	no	0	0	0	no
chr1	236162222	236163219	4.213	4.853	4.111	4.18	1.152	0.976	0.992	0.025	0.851	0.949	yes	no	no	no	no	no	None	V	no	no	F	no	0	0	0	no
chr1	236304085	236308694	6.398	8.168	7.331	6.107	1.277	1.146	0.954	0.004	0.052	0.989	yes	no	no	no	no	yes	GPR137B	II	no	no	F	no	0	0	0	no
chr1	236391164	236392334	4.807	6.283	6.151	5.326	1.307	1.279	1.108	0.434	0.007	0.179	no	yes	no	no	no	no	None	II	no	no	F	no	0	0	0	no
chr1	236517069	236518527	9.385	8.267	8.009	9.308	0.881	0.853	0.992	0.207	0.047	0.531	no	yes	no	no	no	no	None	I	no	no	G	no	0	0	0	no
chr1	236666061	236667201	11.254	16.041	15.615	12.067	1.425	1.387	1.072	0.101	0.042	0.174	no	yes	no	yes	no	no	None	VI	no	no	I	no	0	0	0	no
chr1	236694986	236695800	3.861	1.306	5.223	2.769	0.338	1.353	0.717	0.008	0.303	0.859	yes	no	no	yes	no	no	None	VIII	no	no	G	no	0	0	0	no
chr1	238036676	238038233	5.456	6.478	7.842	4.851	1.187	1.437	0.889	0.027	0.293	0.07	yes	no	no	no	no	no	None	II	no	no	F	no	0	0	0	no
chr1	238551690	238552958	5.413	1.372	2.895	3.308	0.253	0.535	0.611	0.021	0.322	0.067	yes	no	no	no	no	no	None	VIII	no	no	G	no	0	0	0	no
chr1	238731972	238732939	3.93	2.795	4.036	2.675	0.711	1.027	0.681	0.314	0.037	0.998	no	yes	no	no	no	no	None	VIII	no	no	G	no	0	0	0	no
chr1	238770037	238772132	5.697	4.599	4.383	5.064	0.807	0.769	0.889	0.032	0.058	0.236	yes	no	no	no	no	no	None	V	no	no	G	no	0	0	0	no
chr1	239123281	239123851	1.848	3.694	4.068	4.157	1.998	2.201	2.249	0.023	0.141	0.337	yes	no	no	no	no	no	None	VIII	no	no	E	no	0	0	0	no
chr1	239187760	239189613	7.186	7.987	16.944	9.692	1.111	2.358	1.349	0.534	0.046	0.2	no	yes	no	no	no	no	None	I	yes	yes	H	no	0	0	0	no
chr1	239880471	239884768	5.085	7.668	9.864	7.744	1.508	1.94	1.523	0.013	0.253	0.728	yes	no	no	no	no	no	None	IX	no	no	H	no	0	0	0	no
chr1	240060730	240061721	4.839	6.317	7.087	4.989	1.305	1.465	1.031	0.03	0.018	0.799	yes	yes	no	no	no	no	None	II	no	no	I	yes	3.85172	6.22961	1.61736	no
chr1	240280556	240281421	5.932	5.427	3.587	4.819	0.915	0.605	0.812	0.332	0.015	0.077	no	yes	no	no	no	no	None	V	no	no	G	no	0	0	0	no
chr1	242156003	242156440	2.631	2.804	5.947	0.921	1.066	2.26	0.35	0.253	0.002	0.525	no	yes	no	no	no	no	None	VIII	no	no	F	no	0	0	0	no
chr1	242161613	242162830	9.935	10.984	10.594	11.524	1.106	1.066	1.16	0.287	0.039	0.043	no	yes	yes	no	no	yes	MAP1LC3C	I	no	no	F	no	0	0	0	no
chr1	243430739	243431592	2.713	3.654	2.655	2.274	1.347	0.979	0.838	0.024	0.774	0.497	yes	no	no	no	no	no	None	VIII	no	no	F	no	0	0	0	no
chr1	243656123	243662915	5.091	4.841	4.321	5.453	0.951	0.849	1.071	0.04	0.155	0.21	yes	no	no	no	no	no	None	V	no	no	F	no	0	0	0	no
chr1	244210418	244214671	13.969	24.858	12.707	9.19	1.779	0.91	0.658	0.17	0.138	0.011	no	no	yes	no	no	yes	ZBTB18	VII	no	no	I	no	0	0	0	no
chr1	244487377	244488715	8.221	10.672	13.922	11.131	1.298	1.694	1.354	0.081	0.023	0.07	no	yes	no	no	no	no	None	I	no	no	H	no	0	0	0	no
chr1	244509575	244510519	3.327	3.68	4.432	2.333	1.106	1.332	0.701	0.863	0.019	0.13	no	yes	no	no	no	no	None	VIII	no	no	F	no	0	0	0	no
chr1	244763142	244763765	6.631	6.948	4.72	4.361	1.048	0.712	0.658	0.932	0.179	0.023	no	no	yes	no	no	no	None	V	no	no	G	no	0	0	0	no
chr1	244875965	244877094	5.89	9.03	7.422	9.167	1.533	1.26	1.556	0.931	0.901	0.01	no	no	yes	no	no	no	None	IX	no	no	H	no	0	0	0	no
chr1	244951645	244953300	4.337	4.435	4.033	1.198	1.022	0.93	0.276	0.255	0.147	0.005	no	no	yes	no	no	no	None	VIII	no	yes	G	no	0	0	0	no
chr1	244978744	244979949	10.316	8.363	13.751	9.277	0.811	1.333	0.899	0.091	0.032	0.246	no	yes	no	no	no	no	None	I	no	no	F	no	0	0	0	no
chr1	245030320	245033848	4.646	6.193	5.89	5.142	1.333	1.268	1.107	0.138	0.01	0.725	no	yes	no	no	no	no	None	IV	no	no	F	no	0	0	0	no
chr1	245062778	245063945	2.656	6.324	4.649	1.515	2.382	1.751	0.571	0.019	0.499	0.191	yes	no	no	no	no	no	None	IV	no	no	C	no	0	0	0	no
chr1	245108190	245109111	3.752	2.391	4.753	6.527	0.637	1.267	1.74	0.253	0.096	0.005	no	no	yes	no	no	no	None	V	no	yes	F	no	0	0	0	no
chr1	245131327	245138250	5.049	7.931	7.849	6.457	1.571	1.555	1.279	0.143	0.039	0.114	no	yes	no	no	no	yes	EFCAB2	II	no	no	H	no	0	0	0	no
chr1	245140327	245142489	3.402	2.091	2.532	3.715	0.615	0.744	1.092	0.05	0.25	0.699	yes	no	no	no	no	no	None	VIII	no	no	G	no	0	0	0	no
chr1	245204252	245205676	3.618	0.957	3.867	2.827	0.265	1.069	0.781	0.031	0.483	0.592	yes	no	no	no	no	no	None	VIII	no	no	G	no	0	0	0	yes
chr1	245259317	245260101	2.107	1.561	6.859	7.028	0.741	3.255	3.335	0.187	0.031	0.038	no	yes	yes	no	no	no	None	V	no	no	B	no	0	0	0	no
chr1	245335038	245335764	3.463	1.617	5.071	1.243	0.467	1.464	0.359	0.009	0.113	0.009	yes	no	yes	no	yes	no	None	VIII	no	no	G	no	0	0	0	no
chr1	245417766	245419990	5.365	5.515	5.991	6.069	1.028	1.117	1.131	0.024	0.244	0.681	yes	no	no	no	yes	no	None	II	no	no	F	no	0	0	0	no
chr1	245441954	245443306	5.852	7.087	9.855	5.328	1.211	1.684	0.91	0.037	0.205	0.23	yes	no	no	no	yes	no	None	II	no	no	H	no	0	0	0	no
chr1	245515406	245518003	3.925	3.769	2.264	1.197	0.96	0.577	0.305	0.437	0.21	0.014	no	no	yes	no	yes	no	None	VIII	no	no	G	no	0	0	0	no
chr1	245636552	245637307	6.168	7.311	4.852	7.348	1.185	0.787	1.191	0.06	0.033	0	no	yes	yes	no	yes	no	None	II	no	no	F	no	0	0	0	no
chr1	245662977	245665598	6.668	6.545	8.735	9.802	0.982	1.31	1.47	0.66	0.157	0.013	no	no	yes	no	yes	no	None	IX	no	no	F	no	0	0	0	no
chr1	245666443	245668205	3.377	4.638	4.343	2.1	1.374	1.286	0.622	0.038	0.293	0.261	yes	no	no	no	yes	no	None	VIII	no	no	I	no	0	0	0	no
chr1	245670372	245671536	3.449	4.198	4.14	1.062	1.217	1.201	0.308	0.006	0.013	0.001	yes	yes	yes	no	yes	no	None	VIII	no	no	F	no	0	0	0	no
chr1	245679341	245680686	11.497	12.737	22.124	21.155	1.108	1.924	1.84	0.691	0.028	0.006	no	yes	yes	no	yes	no	None	VI	no	no	H	yes	5.89191	4.29865	0.729585	no
chr1	245777732	245778080	2.583	5.953	3.979	2.336	2.305	1.54	0.904	0.016	0.461	0.599	yes	no	no	no	yes	no	None	VIII	no	no	C	no	0	0	0	no
chr1	246058113	246060688	3.411	2.262	3.866	1.398	0.663	1.133	0.41	0.105	0.093	0.001	no	no	yes	no	no	no	None	VIII	no	no	G	no	0	0	0	no
chr1	246230241	246231430	2.732	7.122	5.296	3.675	2.607	1.938	1.345	0.046	0.464	0.206	yes	no	no	no	no	no	None	IV	no	no	C	no	0	0	0	no
chr1	246263121	246264745	3.468	3.918	4.472	2.168	1.13	1.289	0.625	0.648	0.018	0.275	no	yes	no	no	no	no	None	VIII	no	no	F	no	0	0	0	no
chr1	246379884	246383581	5.231	4.72	4.69	3.975	0.902	0.897	0.76	0.035	0.222	0.019	yes	no	yes	no	no	no	None	V	no	no	G	no	0	0	0	no
chr1	246459257	246460088	6.908	6.987	7.065	5.767	1.011	1.023	0.835	0.561	0.071	0.041	no	no	yes	no	no	no	None	II	no	no	F	no	0	0	0	no
chr1	246861337	246862868	12.598	15.96	18.872	11.018	1.267	1.498	0.875	0.388	0.036	0.801	no	yes	no	no	no	no	None	VI	no	no	I	yes	3.35094	6.89978	2.05906	no
chr1	246893382	246895047	5.805	4.852	8.739	6.47	0.836	1.505	1.115	0.045	0.218	0.376	yes	no	no	no	no	no	None	II	no	no	F	no	0	0	0	no
chr1	246996770	246997501	10.067	10.792	14.196	10.581	1.072	1.41	1.051	0.999	0.024	0.101	no	yes	no	no	no	no	None	I	no	no	F	no	0	0	0	no
chr1	247082948	247083727	3.013	6.745	9.187	5.75	2.239	3.049	1.908	0.021	0.006	0.273	yes	yes	no	no	no	no	None	II	no	no	E	no	0	0	0	no
chr1	247091966	247095784	6.731	9.159	10.042	6.29	1.361	1.492	0.935	0.212	0.003	0.178	no	yes	no	no	no	yes	AHCTF1	IX	no	no	I	no	0	0	0	no
chr1	247282223	247283613	3.435	5.777	5.534	2.467	1.682	1.611	0.718	0.022	0.009	0.638	yes	yes	no	no	no	no	None	IV	no	no	I	yes	4.45127	8.8842	1.99588	no
chr1	247338602	247339828	1.043	4.109	3.354	3.17	3.942	3.217	3.041	0.145	0.001	0.423	no	yes	no	no	no	no	None	VIII	no	no	D	no	0	0	0	no
chr1	247431802	247433727	3.353	2.622	3.713	3.443	0.782	1.108	1.027	0.158	0.007	0.09	no	yes	no	no	no	no	None	VIII	no	no	F	no	0	0	0	no
chr1	247510852	247511273	4.345	6.223	5.325	2.769	1.432	1.226	0.637	0.133	0.032	0.147	no	yes	no	no	no	no	None	IV	no	no	I	no	0	0	0	no
chr1	247563638	247566016	5.51	6.474	6.758	5.472	1.175	1.226	0.993	0.237	0.271	0.022	no	no	yes	no	no	no	None	II	no	no	F	yes	4.82547	3.79488	0.786427	no
chr1	247597298	247597987	3.41	4.45	5.214	3.043	1.305	1.529	0.892	0.011	0.195	0.75	yes	no	no	no	no	no	None	V	yes	yes	I	no	0	0	0	no
chr1	248782214	248782592	4.677	1.409	2.976	2.996	0.301	0.636	0.641	0.027	0.567	0.473	yes	no	no	yes	no	no	None	VIII	no	no	G	yes	3.52809	3.79488	1.07562	no
chr1	249116081	249117047	4.396	3.575	4.863	3.624	0.813	1.106	0.824	0.004	0.411	0.003	yes	no	yes	no	no	no	None	V	no	no	F	no	0	0	0	no
chr1	249117931	249121329	6.246	9.858	10.283	6.104	1.578	1.646	0.977	0.204	0.041	0.47	no	yes	no	no	no	yes	SH3BP5L	IX	no	no	I	yes	3.52809	9.33292	2.64532	no
chr1	249131235	249133916	8.314	13.096	13.779	11.465	1.575	1.657	1.379	0.152	0.029	0.605	no	yes	no	no	no	yes	ZNF672	VII	no	no	H	no	0	0	0	no
chr1	249135817	249136602	5.454	8.795	9.571	8.01	1.613	1.755	1.469	0.082	0.007	0.579	no	yes	no	no	no	no	None	IX	no	no	H	no	0	0	0	no
chr1	249155361	249159308	5.807	17.962	19.538	8.159	3.093	3.365	1.405	0.15	0.023	0.247	no	yes	no	no	no	no	None	VI	no	no	E	no	0	0	0	no
chr10	173814	174188	8.096	9.647	11.353	9.386	1.192	1.402	1.159	0.338	0.005	0.013	no	yes	yes	no	no	no	None	I	no	no	F	no	0	0	0	no
chr10	496952	497452	3.729	4.84	7.219	6.014	1.298	1.936	1.613	0.746	0.004	0.775	no	yes	no	no	no	no	None	II	no	no	H	no	0	0	0	no
chr10	992738	993539	3.563	5.444	8.001	5.672	1.528	2.246	1.592	0.122	0.019	0.825	no	yes	no	no	no	no	None	II	no	no	E	no	0	0	0	no
chr10	3087871	3088488	5.287	9.146	8.216	4.758	1.73	1.554	0.9	0.042	0.398	0.491	yes	no	no	no	no	no	None	II	no	yes	I	no	0	0	0	no
chr10	3108974	3111696	3.194	5.876	6.714	3.866	1.84	2.102	1.21	0.009	0.434	0.757	yes	no	no	no	no	yes	PFKP	IV	no	no	C	no	0	0	0	no
chr10	3239570	3240290	4.425	6.119	7.642	5.244	1.383	1.727	1.185	0.197	0.031	0.258	no	yes	no	no	no	no	None	II	no	no	H	yes	5.07696	7.10736	1.39992	no
chr10	3524531	3524849	4.48	5.884	7.554	3.905	1.313	1.686	0.872	0.218	0.036	0.227	no	yes	no	no	no	no	None	IV	no	no	H	no	0	0	0	no
chr10	3818212	3818721	1.181	4.647	5.894	4.491	3.934	4.989	3.801	0.046	0.194	0.141	yes	no	no	yes	no	no	None	V	no	no	A	no	0	0	0	no
chr10	3824281	3829053	6.359	6.003	5.483	6.452	0.944	0.862	1.015	0.71	0.041	0.46	no	yes	no	yes	no	yes	KLF6	II	no	no	F	no	0	0	0	no
chr10	5325431	5325883	4.073	3.893	7.872	4.215	0.956	1.933	1.035	0.273	0.018	0.658	no	yes	no	no	no	no	None	V	no	no	H	no	0	0	0	yes
chr10	5589636	5591235	5.16	7.359	9.246	5.56	1.426	1.792	1.077	0.199	0.024	0.36	no	yes	no	no	no	no	None	II	no	no	H	no	0	0	0	no
chr10	5726394	5726928	5.188	8.035	7.842	4.889	1.549	1.512	0.942	0.035	0.551	0.671	yes	no	no	no	no	yes	FAM208B	II	no	no	I	no	0	0	0	no
chr10	5902057	5902429	8.166	6.036	6.706	6.827	0.739	0.821	0.836	0.043	0.523	0.08	yes	no	no	no	no	no	None	II	no	no	G	no	0	0	0	no
chr10	5993128	5993361	2.36	3.133	4.669	3.345	1.327	1.978	1.417	0.014	0.187	0.348	yes	no	no	no	no	no	None	VIII	no	no	H	no	0	0	0	no
chr10	6170711	6171256	2.449	5.192	5.05	3.253	2.12	2.063	1.329	0.009	0.04	0.205	yes	yes	no	no	no	no	None	IV	no	no	C	no	0	0	0	no
chr10	6204798	6206398	8.784	18.191	11.231	11.939	2.071	1.278	1.359	0.185	0.044	0.203	no	yes	no	no	no	no	None	VII	no	no	C	no	0	0	0	no
chr10	6316717	6317691	5.538	8.207	8.612	4.848	1.482	1.555	0.875	0.174	0.162	0.032	no	no	yes	no	no	no	None	II	no	yes	I	no	0	0	0	no
chr10	6341835	6343048	6.019	8.808	9.062	8.317	1.463	1.505	1.382	0.049	0.019	0.944	yes	yes	no	no	no	no	None	IX	no	no	H	no	0	0	0	no
chr10	6424043	6424438	4.097	7.218	9.126	6.68	1.762	2.227	1.63	0.047	0.041	0.625	yes	yes	no	no	no	no	None	II	no	no	E	no	0	0	0	no
chr10	6642220	6642773	3.535	3.073	6.974	2.622	0.869	1.973	0.742	0.585	0.011	0.187	no	yes	no	no	no	no	None	VIII	no	no	F	no	0	0	0	no
chr10	6811931	6812337	4.318	6.845	6.015	5.42	1.585	1.393	1.255	0.097	0.039	0.081	no	yes	no	no	no	no	None	II	no	no	I	no	0	0	0	no
chr10	7302330	7303331	4.049	7.63	10.068	7.303	1.885	2.487	1.804	0.056	0.037	0.149	no	yes	no	no	no	no	None	IX	no	no	E	no	0	0	0	no
chr10	7448829	7454750	5.3	5.952	6.459	4.804	1.123	1.219	0.906	0.416	0.769	0.011	no	no	yes	no	no	yes	SFMBT2	II	no	no	F	no	0	0	0	no
chr10	7470611	7471128	4.05	1.245	3.109	2.971	0.307	0.768	0.734	0.003	0.922	0.325	yes	no	no	no	no	no	None	VIII	no	no	G	no	0	0	0	no
chr10	7829382	7830792	10.012	14.73	18.15	13.729	1.471	1.813	1.371	0.001	0.038	0.324	yes	yes	no	no	no	yes	KIN	VI	no	no	H	no	0	0	0	no
chr10	10460313	10460776	5.265	4.637	5.642	6.577	0.881	1.072	1.249	0.155	0.09	0.026	no	no	yes	no	no	no	None	V	no	no	F	no	0	0	0	no
chr10	11211783	11213619	4.096	3.739	5.285	3.81	0.913	1.29	0.93	0.043	0.795	0.033	yes	no	yes	no	no	no	None	V	no	no	F	no	0	0	0	no
chr10	11377197	11377794	6.519	8.286	9.061	6.485	1.271	1.39	0.995	0.093	0.048	0.371	no	yes	no	no	no	no	None	IX	no	no	F	no	0	0	0	no
chr10	11684560	11685156	4.128	4.312	3.264	4.58	1.045	0.791	1.11	0.127	0.013	0.119	no	yes	no	no	no	no	None	V	no	no	F	no	0	0	0	no
chr10	12119769	12120149	6.138	4.885	5.828	2.883	0.796	0.949	0.47	0.31	0.167	0.003	no	no	yes	no	no	no	None	IV	no	no	G	no	0	0	0	no
chr10	12126518	12126841	0.853	4.128	1.557	5.225	4.839	1.826	6.125	0.217	0.771	0.046	no	no	yes	no	no	no	None	V	no	no	A	no	0	0	0	no
chr10	12306181	12306706	6.018	7.749	9.035	5.451	1.288	1.501	0.906	0.068	0.034	0.214	no	yes	no	no	no	no	None	IX	no	no	I	yes	4.41011	6.5548	1.48631	yes
chr10	12349439	12350437	3.808	5.94	5.809	3.331	1.56	1.526	0.875	0.01	0.186	0.202	yes	no	no	no	no	no	None	IV	no	no	I	no	0	0	0	no
chr10	12647691	12648084	6.904	10.754	11.793	5.355	1.558	1.708	0.776	0.182	0.085	0.045	no	no	yes	no	no	no	None	IX	no	no	I	no	0	0	0	no
chr10	12761402	12761813	7.715	9.557	10.255	7.835	1.239	1.329	1.016	0.054	0.03	0.049	no	yes	yes	no	no	no	None	IX	no	no	F	no	0	0	0	no
chr10	12824411	12824847	2.656	3.952	5.564	3.267	1.488	2.095	1.23	0.218	0.017	0.378	no	yes	no	no	no	no	None	V	no	no	H	no	0	0	0	no
chr10	13609037	13609416	2.85	4.785	5.797	3.341	1.679	2.034	1.173	0.042	0.126	0.988	yes	no	no	yes	no	no	None	IV	no	no	C	no	0	0	0	no
chr10	13650287	13650723	5.022	4.201	1.971	1.18	0.836	0.392	0.235	0.058	0.12	0.024	no	no	yes	yes	no	no	None	VIII	no	no	G	no	0	0	0	no
chr10	13754486	13755687	4.223	5.65	5.159	4.43	1.338	1.222	1.049	0.01	0.085	0.732	yes	no	no	no	no	no	None	V	no	no	F	no	0	0	0	no
chr10	14226392	14228558	3.263	4.301	4.921	4.196	1.318	1.508	1.286	0.158	0.001	0.133	no	yes	no	no	no	no	None	V	no	no	H	no	0	0	0	no
chr10	14701459	14702342	9.105	9.953	13.279	9.347	1.093	1.459	1.027	0.253	0.026	0.479	no	yes	no	no	no	no	None	I	no	no	F	no	0	0	0	no
chr10	14793120	14794746	5.159	7.864	8.718	5.506	1.524	1.69	1.067	0.207	0.012	0.55	no	yes	no	no	no	no	None	II	no	no	H	no	0	0	0	no
chr10	14879597	14881612	5.452	4.869	4.924	5.148	0.893	0.903	0.944	0.013	0.119	0.006	yes	no	yes	no	no	yes	CDNF	V	no	no	F	no	0	0	0	no
chr10	15138921	15140239	4.813	11.966	9.156	4.193	2.486	1.902	0.871	0.128	0.017	0.298	no	yes	no	no	no	yes	C10orf111	IX	no	no	C	no	0	0	0	no
chr10	15526970	15527400	3.757	1.499	3.365	2.928	0.399	0.895	0.779	0.003	0.036	0.285	yes	yes	no	no	no	no	None	VIII	no	no	G	no	0	0	0	no
chr10	16478443	16479922	6.389	11.02	10.552	7.923	1.725	1.651	1.24	0.088	0.014	0.385	no	yes	no	no	no	yes	PTER	IX	no	no	H	no	0	0	0	no
chr10	16946697	16947072	3.446	3.323	6.171	4.813	0.964	1.791	1.397	0.194	0.013	0.52	no	yes	no	no	no	no	None	V	no	no	H	no	0	0	0	no
chr10	17242869	17244028	3.273	8.252	5.562	3.578	2.521	1.699	1.093	0.031	0.568	0.245	yes	no	no	no	no	yes	TRDMT1	IV	no	no	C	no	0	0	0	no
chr10	18428887	18430100	4.001	6.984	6.369	2.862	1.746	1.592	0.715	0.22	0.048	0.513	no	yes	no	no	no	yes	CACNB2	IV	no	no	I	no	0	0	0	no
chr10	18594889	18595372	4.984	5.696	1.251	3.801	1.143	0.251	0.763	0.845	0.037	0.33	no	yes	no	no	no	no	None	V	no	no	G	no	0	0	0	no
chr10	18620988	18621401	6.671	7.161	10.172	6.479	1.073	1.525	0.971	0.809	0.025	0.562	no	yes	no	no	no	no	None	IX	no	no	F	no	0	0	0	no
chr10	18940345	18940828	6.203	9.547	10.661	5.646	1.539	1.719	0.91	0.157	0.036	0.719	no	yes	no	no	no	yes	NSUN6	IX	no	no	I	no	0	0	0	no
chr10	19484653	19485016	6.374	5.15	6.098	5.097	0.808	0.957	0.8	0.049	0.913	0.126	yes	no	no	no	no	no	None	V	no	no	G	no	0	0	0	no
chr10	20017313	20017688	3.839	2.459	3.43	2.027	0.64	0.894	0.528	0.319	0.089	0.03	no	no	yes	no	no	no	None	VIII	no	no	G	no	0	0	0	no
chr10	20905847	20906464	7.117	7.637	11.459	10.059	1.073	1.61	1.413	0.69	0.013	0.134	no	yes	no	no	no	no	None	I	no	no	H	no	0	0	0	no
chr10	21661845	21662361	3.993	5.842	7.292	5.331	1.463	1.826	1.335	0.236	0.028	0.402	no	yes	no	no	no	no	None	II	no	no	H	no	0	0	0	no
chr10	22096156	22096482	3.119	5.855	7.155	4.41	1.877	2.294	1.414	0.234	0.006	0.43	no	yes	no	no	no	no	None	IV	no	no	E	no	0	0	0	no
chr10	22517937	22518678	5.493	9.359	8.282	4.495	1.704	1.508	0.818	0.05	0.386	0.228	yes	no	no	no	no	no	None	IX	no	no	I	no	0	0	0	no
chr10	22519381	22519793	3.253	4.441	6.192	3.23	1.365	1.903	0.993	0.466	0.032	0.294	no	yes	no	no	no	no	None	IV	no	no	H	no	0	0	0	no
chr10	22767822	22768800	2.686	5.193	8.106	3.451	1.933	3.017	1.285	0.032	0.006	0.813	yes	yes	no	no	no	no	None	IV	no	no	E	no	0	0	0	no
chr10	22904721	22905266	3.816	7.948	8.321	3.786	2.083	2.181	0.992	0.016	0.168	0.546	yes	no	no	no	no	no	None	IV	no	yes	C	no	0	0	0	no
chr10	23216315	23217280	3.858	10.084	7.193	4.548	2.614	1.865	1.179	0.081	0.017	0.789	no	yes	no	no	no	yes	ARMC3	IV	no	no	C	no	0	0	0	no
chr10	23648486	23649203	6.278	5.51	3.425	1.198	0.878	0.546	0.191	0.215	0.094	0.016	no	no	yes	yes	no	no	None	VIII	no	no	G	no	0	0	0	no
chr10	25011181	25014178	5.276	7.125	6.354	5.4	1.35	1.204	1.023	0.097	0.025	0.351	no	yes	no	no	no	yes	ARHGAP21	II	no	no	F	no	0	0	0	no
chr10	25156140	25156535	3.872	5.261	5.944	3.532	1.359	1.535	0.912	0.189	0.001	0.451	no	yes	no	no	no	no	None	IV	no	no	I	no	0	0	0	no
chr10	25171260	25171583	3.059	5.621	5.218	2.814	1.837	1.706	0.92	0.028	0.213	0.4	yes	no	no	no	no	no	None	IV	no	no	I	no	0	0	0	no
chr10	26675692	26676672	7.424	6.94	8.549	10.618	0.935	1.151	1.43	0.512	0.719	0.024	no	no	yes	no	no	no	None	IX	no	no	F	no	0	0	0	no
chr10	26814293	26814903	2.3	2.616	3.588	4.605	1.137	1.56	2.002	0.799	0.011	0.329	no	yes	no	no	no	no	None	VIII	no	no	H	no	0	0	0	no
chr10	26844972	26845294	2.245	2.691	5.016	2.628	1.198	2.234	1.171	0.234	0.03	0.728	no	yes	no	no	no	no	None	VIII	no	no	H	no	0	0	0	no
chr10	26985900	26987384	7.945	16.417	15.9	9.869	2.066	2.001	1.242	0.18	0.042	0.212	no	yes	no	no	no	yes	PDSS1	VI	no	no	C	no	0	0	0	no
chr10	27070292	27070563	4.364	5.238	5.828	3.648	1.2	1.336	0.836	0.201	0.041	0.224	no	yes	no	no	no	no	None	IV	no	no	F	no	0	0	0	no
chr10	27531846	27532551	3.296	5.642	6.093	1.27	1.712	1.849	0.385	0.006	0.008	0.186	yes	yes	no	no	no	no	None	IV	no	no	I	no	0	0	0	no
chr10	27792841	27793730	8.297	11.235	10.746	7.379	1.354	1.295	0.889	0.161	0.028	0.062	no	yes	no	no	no	yes	RAB18	I	no	no	F	no	0	0	0	no
chr10	28105298	28105647	4.669	3.029	2.187	2.615	0.649	0.469	0.56	0.179	0.43	0.025	no	no	yes	no	no	no	None	VIII	no	no	G	no	0	0	0	no
chr10	28721142	28721550	4.63	5.236	8.017	5.216	1.131	1.731	1.127	0.803	0.01	0.716	no	yes	no	no	no	no	None	II	no	no	H	yes	3.65065	6.1955	1.6971	no
chr10	28917064	28917815	3.271	5.301	4.078	4.328	1.62	1.247	1.323	0.023	0.295	0.524	yes	no	no	no	no	no	None	V	no	no	I	no	0	0	0	no
chr10	29180080	29180607	5.783	6.881	9.785	6.859	1.19	1.692	1.186	0.392	0.005	0.367	no	yes	no	no	no	no	None	IX	no	no	H	no	0	0	0	no
chr10	30444237	30445051	3.121	4.179	5.804	2.392	1.339	1.86	0.766	0.245	0.007	0.193	no	yes	no	no	no	no	None	VIII	no	no	H	no	0	0	0	no
chr10	30471031	30471998	3.433	5.317	4.59	3.239	1.549	1.337	0.943	0.043	0.914	0.331	yes	no	no	no	no	no	None	IV	no	no	I	no	0	0	0	no
chr10	30516391	30516829	6.64	8.712	7.395	4.957	1.312	1.114	0.746	0.256	0.466	0.033	no	no	yes	no	no	no	None	IX	no	no	F	no	0	0	0	no
chr10	30573857	30575014	1.767	2.713	4.222	4.328	1.535	2.389	2.449	0.785	0.008	0.172	no	yes	no	no	no	no	None	VIII	no	no	E	no	0	0	0	no
chr10	30782050	30783955	7.461	9.203	9.179	9.345	1.233	1.23	1.253	0.393	0.752	0.04	no	no	yes	no	no	no	None	IX	no	no	F	no	0	0	0	no
chr10	30990313	30991061	3.066	5.421	4.12	3.077	1.768	1.344	1.004	0.004	0.209	0.88	yes	no	no	no	no	no	None	VIII	no	no	I	no	0	0	0	no
chr10	31009442	31009846	2.876	5.702	4.223	2.24	1.982	1.468	0.779	0.031	0.193	0.184	yes	no	no	no	no	no	None	VIII	no	no	I	no	0	0	0	no
chr10	31015410	31017346	3.724	5.952	5.223	2.884	1.598	1.403	0.775	0.016	0.61	0.273	yes	no	no	no	no	no	None	IV	no	no	I	yes	4.07908	3.97218	0.973793	no
chr10	31030685	31031743	3.626	4.743	7.641	3.04	1.308	2.107	0.838	0.035	0	0.313	yes	yes	no	no	no	no	None	IV	no	no	H	no	0	0	0	no
chr10	31372664	31373121	5.847	9.083	8.793	3.72	1.554	1.504	0.636	0.064	0.057	0.034	no	no	yes	no	no	no	None	IX	no	no	I	no	0	0	0	yes
chr10	31870661	31871306	6.054	7.996	10.471	7.531	1.321	1.73	1.244	0.001	0.058	0.344	yes	no	no	no	no	no	None	IX	no	no	H	no	0	0	0	no
chr10	31995775	31997219	2.887	4.043	5.642	4.759	1.401	1.954	1.649	0.528	0.003	0.334	no	yes	no	no	no	no	None	V	no	no	H	no	0	0	0	no
chr10	32250143	32251033	5.663	7.654	7.781	6.268	1.351	1.374	1.107	0.042	0.05	0.781	yes	yes	no	no	no	no	None	II	no	no	H	no	0	0	0	no
chr10	32344393	32345833	9.532	18.214	16.101	8.779	1.911	1.689	0.921	0.156	0.006	0.573	no	yes	no	no	no	yes	KIF5B	VI	no	no	C	no	0	0	0	no
chr10	32428237	32428648	4.799	6.408	7.208	5.73	1.335	1.502	1.194	0.114	0.042	0.343	no	yes	no	no	no	no	None	II	no	no	H	no	0	0	0	no
chr10	32667530	32668939	6.409	9.505	7.715	4.093	1.483	1.204	0.639	0.035	0.653	0.197	yes	no	no	no	no	yes	EPC1	IX	no	no	I	no	0	0	0	no
chr10	33294028	33295649	3.841	5.265	8.565	7.754	1.371	2.23	2.018	0.047	0.17	0.84	yes	no	no	no	no	no	None	II	no	no	E	no	0	0	0	no
chr10	34255017	34255430	4.001	2.717	2.855	0.881	0.679	0.714	0.22	0.248	0.699	0.019	no	no	yes	yes	no	no	None	VIII	no	no	G	no	0	0	0	no
chr10	34330266	34330718	0.98	2.458	4.778	4.723	2.509	4.877	4.822	0.323	0.034	0.056	no	yes	no	yes	no	no	None	V	no	no	B	no	0	0	0	no
chr10	35102714	35105053	3.247	6.536	4.915	2.478	2.013	1.514	0.763	0.007	0.496	0.249	yes	no	no	yes	no	yes	PARD3	IV	no	no	I	yes	4.41011	4.73824	1.0744	no
chr10	35330233	35330819	1.385	3.578	6.793	3.778	2.583	4.904	2.728	0.292	0.048	0.42	no	yes	no	yes	no	no	None	V	no	no	B	no	0	0	0	no
chr10	43277490	43278693	4.708	12.754	6.235	4.299	2.709	1.324	0.913	0.181	0.022	0.213	no	yes	no	no	no	yes	BMS1	IV	no	no	I	no	0	0	0	no
chr10	43465735	43466875	3.757	4.867	2.487	1.198	1.295	0.662	0.319	0.305	0.172	0.004	no	no	yes	yes	no	no	None	VIII	no	no	G	no	0	0	0	no
chr10	43927762	43928155	2.521	4.105	7.156	3.528	1.628	2.838	1.399	0.186	0.002	0.599	no	yes	no	yes	no	no	None	V	no	no	E	no	0	0	0	no
chr10	44311799	44312148	4.587	6.935	8.659	5.197	1.512	1.888	1.133	0.1	0.029	0.901	no	yes	no	no	no	no	None	II	no	no	H	no	0	0	0	no
chr10	44341773	44342264	3.966	7.894	8.179	2.693	1.99	2.062	0.679	0.004	0.312	0.184	yes	no	no	no	no	no	None	IV	no	no	C	no	0	0	0	no
chr10	44499973	44501153	7.814	10.355	11.088	10.172	1.325	1.419	1.302	0.024	0.876	0.765	yes	no	no	no	no	no	None	I	no	no	H	no	0	0	0	no
chr10	44509360	44509852	0.969	3.76	3.393	4.915	3.881	3.502	5.073	0.17	0.035	0.085	no	yes	no	no	no	no	None	V	no	no	A	no	0	0	0	no
chr10	44911981	44912309	3.438	6.539	2.976	4.156	1.902	0.866	1.209	0.034	0.989	0.679	yes	no	no	no	no	no	None	IV	no	no	I	no	0	0	0	no
chr10	45559043	45559395	5.151	4.57	6.201	4.659	0.887	1.204	0.905	0.265	0.001	0.564	no	yes	no	no	no	no	None	V	no	no	F	no	0	0	0	no
chr10	45849609	45850259	12.729	11.309	14.289	13.858	0.888	1.123	1.089	0.469	0.01	0.744	no	yes	no	no	no	no	None	VI	no	no	F	no	0	0	0	no
chr10	45868714	45870859	4.584	7.374	7.274	6.428	1.609	1.587	1.402	0.014	0.337	0.884	yes	no	no	no	no	yes	ALOX5	II	no	no	H	no	0	0	0	no
chr10	45874440	45877351	9.278	10.028	10.511	10.102	1.081	1.133	1.089	0.004	0.8	0.985	yes	no	no	no	no	no	None	I	no	no	F	no	0	0	0	no
chr10	45899079	45899995	6.366	9.679	11.675	8.281	1.521	1.834	1.301	0.023	0.058	0.116	yes	no	no	no	no	no	None	I	no	no	H	no	0	0	0	no
chr10	47003930	47005383	2.887	4.331	3.561	1.124	1.5	1.233	0.389	0.022	0.157	0.013	yes	no	yes	no	no	no	None	VIII	no	no	I	no	0	0	0	no
chr10	47627135	47627668	6.542	7.199	6.087	5.089	1.101	0.93	0.778	0.896	0.167	0.045	no	no	yes	no	no	no	None	II	no	no	F	yes	6.40304	9.47648	1.48	yes
chr10	49705204	49705647	4.127	4.015	3.418	0.953	0.973	0.828	0.231	0.374	0.465	0.016	no	no	yes	no	no	no	None	VIII	no	no	G	no	0	0	0	no
chr10	49785116	49785690	10.643	9.706	11.76	10.697	0.912	1.105	1.005	0.384	0.022	0.015	no	yes	yes	no	no	no	None	I	no	no	F	no	0	0	0	no
chr10	49814962	49815737	1.928	2.512	4.534	2.258	1.303	2.351	1.171	0.24	0.026	0.302	no	yes	no	no	no	no	None	VIII	no	no	H	no	0	0	0	no
chr10	49916124	49916664	4.12	5.753	8.408	7.086	1.396	2.041	1.72	0.233	0.003	0.5	no	yes	no	no	no	no	None	II	no	no	H	no	0	0	0	no
chr10	49921551	49922683	4.522	3.238	6.208	5.957	0.716	1.373	1.317	0.21	0.045	0.401	no	yes	no	no	no	no	None	V	no	no	F	no	0	0	0	no
chr10	50108402	50109085	4.002	3.429	8.941	5.664	0.857	2.234	1.415	0.226	0.008	0.092	no	yes	no	no	no	no	None	V	no	no	H	no	0	0	0	no
chr10	50396281	50396765	7.179	9.679	11.952	7.635	1.348	1.665	1.063	0.298	0.033	0.496	no	yes	no	no	no	yes	C10orf128	I	no	no	H	no	0	0	0	no
chr10	50465179	50465760	4.052	7.246	6.189	4.3	1.788	1.527	1.061	0.148	0.026	0.204	no	yes	no	no	no	no	None	IV	no	no	I	no	0	0	0	no
chr10	50490947	50491545	7.199	10.608	9.925	9.965	1.473	1.379	1.384	0.038	0.143	0.803	yes	no	no	no	no	no	None	I	no	no	H	no	0	0	0	no
chr10	50493217	50493644	6.71	4.739	5.377	6.909	0.706	0.801	1.03	0.04	0.048	0.159	yes	yes	no	no	no	no	None	V	no	no	G	no	0	0	0	no
chr10	60026542	60028176	8.557	10.934	11.196	7.987	1.278	1.308	0.933	0.028	0.103	0.069	yes	no	no	no	no	yes	IPMK	I	no	no	F	no	0	0	0	no
chr10	60352783	60353194	2.631	6.367	7.159	6.608	2.42	2.721	2.511	0.004	0.184	0.091	yes	no	no	no	no	no	None	II	no	no	E	no	0	0	0	no
chr10	61468736	61470215	3.323	7.638	7.678	4.54	2.299	2.311	1.366	0.009	0.006	0.621	yes	yes	no	no	no	yes	SLC16A9	II	no	no	C	no	0	0	0	no
chr10	61649215	61650320	3.876	4.596	4.533	1.243	1.186	1.169	0.321	0.054	0.109	0.006	no	no	yes	yes	no	no	None	VIII	no	no	F	no	0	0	0	no
chr10	62042549	62042882	5.641	3.788	4.502	3.466	0.671	0.798	0.614	0.114	0.109	0.046	no	no	yes	yes	no	no	None	V	no	no	G	no	0	0	0	no
chr10	62703227	62704650	4.284	7.676	7.469	3.103	1.792	1.743	0.724	0.097	0.002	0.179	no	yes	no	no	no	yes	RHOBTB1	IV	no	no	I	no	0	0	0	no
chr10	64391898	64392621	3.303	6.142	5.611	4.881	1.86	1.699	1.478	0.043	0.109	0.504	yes	no	no	no	no	no	None	IV	no	no	H	no	0	0	0	no
chr10	64440961	64441557	2.898	6.467	5.755	3.829	2.231	1.986	1.321	0.024	0.294	0.717	yes	no	no	no	no	no	None	IV	no	no	C	no	0	0	0	yes
chr10	64468146	64468716	5.411	4.381	7.02	5.986	0.81	1.297	1.106	0.171	0.005	0.069	no	yes	no	no	no	no	None	II	no	no	F	no	0	0	0	no
chr10	64693942	64694465	3.422	5.689	5.573	4.401	1.662	1.628	1.286	0.03	0.534	0.991	yes	no	no	no	no	no	None	V	no	no	H	no	0	0	0	no
chr10	65224234	65226225	3.336	6.229	5.477	2.985	1.867	1.642	0.895	0.016	0.506	0.227	yes	no	no	no	no	yes	JMJD1C-AS1	IV	yes	no	I	no	0	0	0	no
chr10	65278406	65279107	3.942	2.688	4.057	3.223	0.682	1.029	0.818	0.286	0.398	0.02	no	no	yes	no	no	no	None	VIII	no	no	G	no	0	0	0	no
chr10	65796320	65796736	4.422	3.136	5.176	2.512	0.709	1.171	0.568	0.248	0.218	0.003	no	no	yes	no	no	no	None	VIII	no	no	G	no	0	0	0	no
chr10	66335426	66336377	8.115	6.21	7.712	6.685	0.765	0.95	0.824	0.135	0.868	0.041	no	no	yes	no	no	no	None	II	no	no	G	no	0	0	0	no
chr10	67585258	67585704	7.217	5.27	2.849	4.533	0.73	0.395	0.628	0.221	0.002	0.103	no	yes	no	no	no	no	None	V	no	no	G	no	0	0	0	no
chr10	68985010	68985427	4.524	4.718	5.889	4.349	1.043	1.302	0.961	0.786	0.034	0.147	no	yes	no	no	no	no	None	V	no	no	F	no	0	0	0	no
chr10	69144321	69145234	4.313	3.93	4.676	4.991	0.911	1.084	1.157	0.004	0.136	0.531	yes	no	no	no	no	no	None	V	no	no	F	no	0	0	0	no
chr10	70231349	70232138	6.784	10.636	7.473	4.652	1.568	1.102	0.686	0.097	0.491	0.048	no	no	yes	no	no	yes	DNA2	IX	no	yes	I	no	0	0	0	no
chr10	70715262	70717094	6.365	8.873	12.143	5.908	1.394	1.908	0.928	0.277	0.025	0.204	no	yes	no	no	no	yes	DDX21	IX	no	no	H	no	0	0	0	no
chr10	70824473	70826273	4.424	7.171	11.836	12.7	1.621	2.675	2.871	0.19	0.186	0.007	no	no	yes	no	no	no	None	I	yes	no	E	no	0	0	0	no
chr10	70844996	70846312	8.017	6.927	8.963	8.628	0.864	1.118	1.076	0.099	0.009	0.579	no	yes	no	no	no	no	None	IX	no	no	F	no	0	0	0	no
chr10	70861271	70862028	5.413	6.309	5.869	3.075	1.166	1.084	0.568	0.203	0.493	0.006	no	no	yes	no	no	no	None	IV	no	no	F	no	0	0	0	no
chr10	71169752	71170177	7.147	9.502	12.881	8.727	1.33	1.802	1.221	0.054	0.016	0.94	no	yes	no	no	no	no	None	I	no	no	H	no	0	0	0	no
chr10	71217591	71218598	3.261	6.046	8.734	5.913	1.854	2.678	1.813	0.189	0.041	0.359	no	yes	no	no	no	no	None	II	no	no	E	no	0	0	0	no
chr10	71275353	71275756	6.767	8.728	11.13	6.29	1.29	1.645	0.93	0.294	0.012	0.389	no	yes	no	no	no	no	None	IX	no	no	H	yes	5.58466	10.6158	1.90088	yes
chr10	71404252	71404674	2.528	5.6	7.848	3.517	2.216	3.105	1.391	0.006	0.01	0.724	yes	yes	no	no	no	no	None	IV	no	no	E	yes	3.2958	13.0302	3.95357	yes
chr10	71492303	71495632	3.795	6.597	8.681	6.688	1.739	2.288	1.762	0.037	0.093	0.149	yes	no	no	no	no	no	None	II	yes	no	E	no	0	0	0	no
chr10	71577001	71577694	5.53	5.448	8.273	6.022	0.985	1.496	1.089	0.913	0.004	0.926	no	yes	no	no	no	no	None	II	no	no	F	no	0	0	0	no
chr10	71891986	71893396	3.347	6.618	5.24	3.544	1.977	1.566	1.059	0.004	0.379	0.829	yes	no	no	no	no	yes	AIFM2	IV	no	no	C	no	0	0	0	no
chr10	71923909	71924289	5.848	4.976	5.252	5.31	0.851	0.898	0.908	0.018	0.028	0.919	yes	yes	no	no	no	no	None	V	no	no	G	no	0	0	0	no
chr10	72056060	72056609	5.875	8.751	5.781	4.533	1.49	0.984	0.772	0.047	0.271	0.324	yes	no	no	yes	no	no	None	II	no	no	I	no	0	0	0	no
chr10	72124186	72124573	2.119	8.533	5.978	2.117	4.027	2.821	0.999	0.035	0.181	0.542	yes	no	no	yes	no	no	None	IV	no	no	D	yes	7.47793	6.35032	0.849208	yes
chr10	72165167	72165576	2.455	3.95	3.567	2.691	1.609	1.453	1.096	0.015	0.235	0.655	yes	no	no	yes	no	no	None	VIII	no	no	I	no	0	0	0	no
chr10	72352675	72353025	3.3	3.684	4.551	1.243	1.116	1.379	0.377	0.736	0.296	0.001	no	no	yes	yes	no	no	None	VIII	no	no	F	no	0	0	0	no
chr10	72354434	72354753	5.423	6.369	4.993	1.606	1.174	0.921	0.296	0.324	0.79	0.03	no	no	yes	yes	no	no	None	IV	no	no	G	no	0	0	0	no
chr10	72575381	72576729	6.355	9.694	9.134	6.024	1.525	1.437	0.948	0.099	0.038	0.215	no	yes	no	yes	no	yes	SGPL1	IX	no	no	I	yes	3.52809	8.3857	2.37684	no
chr10	72594249	72594602	0.978	3.303	3.112	4.356	3.377	3.182	4.454	0.184	0.467	0.002	no	no	yes	yes	no	no	None	VIII	no	no	B	no	0	0	0	no
chr10	72626198	72626647	7.302	8.48	11.443	9.866	1.161	1.567	1.351	0.042	0.042	0.734	yes	yes	no	yes	no	no	None	I	no	no	H	no	0	0	0	no
chr10	72790479	72790912	4.4	3.134	4.656	1.425	0.712	1.058	0.324	0.212	0.564	0.006	no	no	yes	no	no	no	None	VIII	no	no	G	no	0	0	0	no
chr10	72971957	72973452	10.693	17.846	11.232	7.997	1.669	1.05	0.748	0.202	0.032	0.136	no	yes	no	no	no	yes	UNC5B	VII	no	no	I	no	0	0	0	no
chr10	72993326	72995615	4.204	6.777	5.71	4.85	1.612	1.358	1.154	0.138	0.044	0.302	no	yes	no	no	no	no	None	IV	no	no	I	no	0	0	0	no
chr10	73093058	73093647	4.766	7.122	8.547	3.746	1.494	1.793	0.786	0.025	0.155	0.94	yes	no	no	no	no	no	None	II	no	no	I	no	0	0	0	no
chr10	73123808	73124846	8.367	10.7	15.464	11.743	1.279	1.848	1.404	0.885	0.037	0.47	no	yes	no	no	no	no	None	I	no	no	H	no	0	0	0	no
chr10	73131412	73133304	4.992	6.224	6.528	6.831	1.247	1.308	1.368	0.048	0.055	0.016	yes	no	yes	no	no	no	None	II	no	no	H	no	0	0	0	no
chr10	73155954	73158538	6.289	7.464	6.594	4.069	1.187	1.048	0.647	0.274	0.592	0.042	no	no	yes	no	no	yes	CDH23	II	no	no	F	no	0	0	0	no
chr10	73349865	73350859	5.775	7.474	6.805	3.574	1.294	1.178	0.619	0.016	0.057	0.286	yes	no	no	no	no	no	None	IV	no	no	F	no	0	0	0	no
chr10	73372959	73373644	5.131	6.048	7.691	4.276	1.179	1.499	0.833	0.869	0.037	0.202	no	yes	no	no	no	no	None	II	no	no	F	no	0	0	0	no
chr10	73456353	73456803	4.171	5.915	3.582	1.787	1.418	0.859	0.428	0.105	0.623	0.013	no	no	yes	no	no	no	None	VIII	no	no	G	yes	4.41011	12.4379	2.82031	yes
chr10	73467817	73468452	3.304	7.297	5.464	3.427	2.209	1.654	1.037	0.025	0.612	0.437	yes	no	no	no	no	no	None	IV	no	no	C	yes	2.93503	9.47648	3.22875	yes
chr10	73563778	73564308	7.772	7.243	10.291	9.4	0.932	1.324	1.209	0.262	0.078	0.019	no	no	yes	no	no	no	None	I	no	no	F	no	0	0	0	no
chr10	73627992	73628400	4.004	8.254	9.034	4.747	2.061	2.256	1.186	0.011	0.023	0.556	yes	yes	no	no	no	no	None	II	no	yes	C	no	0	0	0	no
chr10	73647542	73650438	5.903	7.522	7.477	6.254	1.274	1.267	1.059	0.097	0.008	0.574	no	yes	no	no	no	no	None	II	no	no	F	no	0	0	0	no
chr10	73698070	73699339	3.984	4.919	4.102	6.118	1.235	1.029	1.536	0.031	0.17	0.015	yes	no	yes	no	no	no	None	V	yes	no	F	no	0	0	0	no
chr10	73992531	73993007	4.908	8.204	13.044	7.606	1.672	2.658	1.55	0.187	0.016	0.595	no	yes	no	no	no	no	None	IX	no	no	E	no	0	0	0	no
chr10	74094047	74095780	7.514	9.495	11.494	6.95	1.264	1.53	0.925	0.263	0.048	0.139	no	yes	no	no	no	no	None	IX	yes	no	F	yes	4.70234	4.85488	1.03244	no
chr10	74646801	74647283	4.028	1.311	4.24	2.097	0.325	1.053	0.521	0.036	0.372	0.125	yes	no	no	yes	no	no	None	VIII	no	yes	G	no	0	0	0	no
chr10	75011517	75013291	7.205	9.056	11.034	6.418	1.257	1.532	0.891	0.804	0.036	0.938	no	yes	no	yes	no	yes	MRPS16	IX	no	no	I	no	0	0	0	no
chr10	75401303	75401826	5.36	7.785	5.315	2.941	1.452	0.992	0.549	0.008	0.155	0.224	yes	no	no	no	no	yes	MYOZ1	IV	no	no	I	no	0	0	0	no
chr10	75489880	75490705	5.076	8.588	9.142	6.622	1.692	1.801	1.304	0.079	0.041	0.401	no	yes	no	no	no	yes	BMS1P4	IX	no	no	H	no	0	0	0	no
chr10	75616941	75618214	5.211	7.134	7.818	3.554	1.369	1.5	0.682	0.013	0.024	0.156	yes	yes	no	no	no	no	None	II	no	no	I	no	0	0	0	no
chr10	75648875	75649268	7.022	10.48	9.687	6.912	1.493	1.38	0.984	0.044	0.514	0.041	yes	no	yes	no	no	no	None	IX	no	no	I	no	0	0	0	no
chr10	75718167	75718731	3.856	5.992	6.695	4.583	1.554	1.736	1.189	0.43	0.004	0.918	no	yes	no	no	no	no	None	IV	no	no	H	no	0	0	0	no
chr10	75925897	75926675	3.263	6.211	7.371	4.443	1.903	2.259	1.362	0.054	0.015	0.497	no	yes	no	no	no	no	None	IV	no	no	E	no	0	0	0	no
chr10	76802884	76803908	8.652	15.267	12.827	9.372	1.765	1.483	1.083	0.119	0.035	0.898	no	yes	no	no	no	no	None	VII	no	no	I	no	0	0	0	no
chr10	76859692	76860150	6.018	9.675	9.72	3.043	1.608	1.615	0.506	0.158	0.028	0.116	no	yes	no	no	no	no	None	IX	no	no	I	no	0	0	0	yes
chr10	77372575	77373128	2.424	2.83	5.276	3.884	1.168	2.177	1.603	0.689	0.044	0.909	no	yes	no	no	no	no	None	V	no	no	H	no	0	0	0	no
chr10	77715827	77716703	5.929	4.226	4.945	3.054	0.713	0.834	0.515	0.184	0.358	0.025	no	no	yes	no	no	no	None	V	no	no	G	no	0	0	0	no
chr10	77796132	77796519	3.528	7.219	7.706	5.333	2.046	2.184	1.512	0.022	0.109	0.459	yes	no	no	no	no	no	None	II	no	no	E	yes	4.70234	9.04912	1.92439	yes
chr10	78030068	78030665	6.848	5.677	8.068	7.04	0.829	1.178	1.028	0.217	0.579	0.01	no	no	yes	no	no	no	None	II	no	no	F	no	0	0	0	no
chr10	78641871	78642974	4.45	5.379	6.004	4.788	1.209	1.349	1.076	0.146	0.03	0.308	no	yes	no	no	no	no	None	V	no	no	F	no	0	0	0	no
chr10	78721606	78722136	5.898	4.97	8.852	6.972	0.843	1.501	1.182	0.212	0.015	0.339	no	yes	no	no	no	no	None	II	no	yes	F	no	0	0	0	no
chr10	79788988	79789796	8.091	15.255	12.285	8.63	1.885	1.518	1.067	0.073	0.014	0.699	no	yes	no	no	no	yes	POLR3A	VII	no	no	I	yes	7.6413	4.82985	0.632072	yes
chr10	79793328	79794750	2.461	4.213	4.641	3.142	1.712	1.886	1.277	0.018	0.179	0.806	yes	no	no	no	no	yes	RPS24	VIII	no	no	H	no	0	0	0	no
chr10	79974631	79975821	4.299	6.183	6.88	4.017	1.438	1.6	0.934	0.036	0.162	0.292	yes	no	no	no	no	no	None	IV	no	yes	I	no	0	0	0	no
chr10	80417311	80417692	4.835	8.895	9.183	5.895	1.84	1.899	1.219	0.01	0.096	0.985	yes	no	no	no	no	no	None	IX	no	no	C	yes	4.11455	8.29192	2.01527	yes
chr10	80513976	80514426	5.797	8.313	10.823	6.652	1.434	1.867	1.147	0.063	0.025	0.927	no	yes	no	no	no	no	None	IX	no	yes	H	no	0	0	0	no
chr10	80841017	80841718	5.905	8.871	9.416	5.232	1.502	1.595	0.886	0.051	0.049	0.355	no	yes	no	no	no	no	None	IX	no	no	I	no	0	0	0	no
chr10	80886428	80887720	8.436	9.215	9.06	5.009	1.092	1.074	0.594	0.378	0.457	0.03	no	no	yes	no	no	no	None	IX	no	no	F	no	0	0	0	no
chr10	80889092	80889759	4.642	6.269	5.907	1.243	1.35	1.272	0.268	0.183	0.894	0.002	no	no	yes	no	no	no	None	IV	no	no	F	no	0	0	0	no
chr10	81163994	81164548	5.228	7.754	8.736	5.775	1.483	1.671	1.105	0.155	0.005	0.485	no	yes	no	no	no	no	None	II	no	no	H	no	0	0	0	no
chr10	81698464	81699230	8.639	12.94	11.352	9.539	1.498	1.314	1.104	0.031	0.125	0.321	yes	no	no	no	no	no	None	VII	no	no	I	no	0	0	0	no
chr10	81838242	81839159	5.952	8.48	11.106	5.639	1.425	1.866	0.948	0.175	0.029	0.399	no	yes	no	no	no	yes	TMEM254	IX	no	no	H	no	0	0	0	no
chr10	81903570	81904971	2.68	4.342	5.016	4.552	1.62	1.872	1.699	0.215	0.043	0.264	no	yes	no	no	no	no	None	V	no	no	H	no	0	0	0	no
chr10	81959628	81959959	2.943	5.801	7.731	5.538	1.971	2.627	1.882	0.127	0.017	0.195	no	yes	no	no	no	no	None	II	no	no	E	no	0	0	0	no
chr10	81963915	81965812	7.408	11.354	12.071	7.001	1.533	1.629	0.945	0.15	0.036	0.815	no	yes	no	no	no	yes	ANXA11	I	no	no	I	no	0	0	0	no
chr10	82218592	82219587	4.765	6.727	7.495	5.132	1.412	1.573	1.077	0.029	0.424	0.162	yes	no	no	no	no	no	None	II	no	no	H	no	0	0	0	no
chr10	82245148	82246452	4.865	6.495	8.204	5.868	1.335	1.686	1.206	0.24	0.014	0.647	no	yes	no	no	no	no	None	II	no	no	H	no	0	0	0	no
chr10	82422486	82422987	3.174	7.81	6.547	5.549	2.461	2.063	1.748	0.036	0.334	0.667	yes	no	no	no	no	no	None	II	no	no	E	no	0	0	0	yes
chr10	82615184	82615468	3.256	4.869	5.186	1.062	1.496	1.593	0.326	0.038	0.691	0.187	yes	no	no	no	no	no	None	VIII	no	no	I	no	0	0	0	yes
chr10	85754084	85754420	5.233	3.767	5.43	3.543	0.72	1.038	0.677	0.264	0.301	0.042	no	no	yes	no	no	no	None	V	no	no	G	no	0	0	0	no
chr10	85965390	85965682	5.08	3.342	5.063	2.124	0.658	0.997	0.418	0.15	0.451	0.023	no	no	yes	no	no	no	None	VIII	no	no	G	yes	4.11455	6.62029	1.60899	no
chr10	86087811	86088959	13.471	18.205	17.651	8.556	1.351	1.31	0.635	0.188	0.013	0.047	no	yes	yes	no	no	yes	CCSER2	VI	no	no	I	no	0	0	0	no
chr10	88124487	88127545	2.721	4.82	4.037	1.062	1.771	1.484	0.39	0.01	0.576	0.186	yes	no	no	no	no	yes	GRID1	VIII	no	yes	I	no	0	0	0	no
chr10	88354316	88354643	2.828	3.952	6.64	3.543	1.398	2.348	1.253	0.229	0.005	0.274	no	yes	no	no	no	no	None	V	no	no	H	no	0	0	0	no
chr10	88718868	88719428	3.28	6.951	4.729	2.601	2.119	1.442	0.793	0.016	0.22	0.41	yes	no	no	no	no	no	None	IV	no	no	I	no	0	0	0	no
chr10	88814239	88815058	3.819	5.635	5.454	5.21	1.475	1.428	1.364	0.319	0.309	0.026	no	no	yes	no	no	no	None	V	no	no	H	no	0	0	0	no
chr10	89305910	89306433	5.42	4.798	6.349	3.741	0.885	1.172	0.69	0.572	0.018	0.017	no	yes	yes	no	no	no	None	V	no	no	F	no	0	0	0	no
chr10	89801820	89803661	3.803	5.939	6.35	5.01	1.562	1.67	1.317	0.039	0.094	0.578	yes	no	no	no	no	no	None	IV	no	yes	H	no	0	0	0	no
chr10	90146841	90147324	4.277	5.875	5.747	5.606	1.374	1.344	1.311	0.701	0.003	0.022	no	yes	yes	no	no	no	None	V	no	no	H	no	0	0	0	no
chr10	90357739	90358113	4.599	4.864	3.566	4.351	1.057	0.775	0.946	0.244	0.779	0.046	no	no	yes	no	no	no	None	V	no	no	F	no	0	0	0	no
chr10	91173985	91175222	4.142	6.051	6.487	3.868	1.461	1.566	0.934	0.098	0.009	0.824	no	yes	no	no	no	yes	IFIT5	IV	no	no	I	no	0	0	0	no
chr10	92078507	92078838	6.531	5.195	6.971	5.254	0.795	1.067	0.804	0.059	0.055	0.028	no	no	yes	no	no	no	None	II	no	no	G	no	0	0	0	no
chr10	92548547	92549102	4.574	1.093	1.036	1.754	0.239	0.226	0.383	0.002	0.067	0.235	yes	no	no	no	no	no	None	VIII	no	no	G	no	0	0	0	no
chr10	92631555	92632061	4.482	9.231	8.121	4.984	2.059	1.812	1.112	0.021	0.297	0.379	yes	no	no	no	no	yes	RPP30	II	no	no	C	no	0	0	0	no
chr10	93057930	93058548	6.119	11.404	11.71	7.279	1.864	1.914	1.19	0.133	0.021	0.42	no	yes	no	no	no	no	None	IX	no	no	C	yes	9.2036	7.50492	0.815433	yes
chr10	93557640	93560047	7.344	17.516	12.248	7.82	2.385	1.668	1.065	0.165	0.043	0.794	no	yes	no	no	no	yes	TNKS2	VII	no	no	C	no	0	0	0	no
chr10	93682874	93684182	9.136	7.21	6.802	7.561	0.789	0.744	0.828	0.944	0.004	0.244	no	yes	no	no	no	yes	BTAF1	II	no	no	G	no	0	0	0	no
chr10	93860895	93861488	4.395	9.574	8.641	6.322	2.179	1.966	1.439	0.015	0.027	0.611	yes	yes	no	no	no	no	None	IX	no	no	C	no	0	0	0	no
chr10	94002799	94003234	3.18	4.984	5.181	5.034	1.567	1.629	1.583	0.372	0.019	0.677	no	yes	no	no	no	yes	CPEB3	V	no	no	H	no	0	0	0	no
chr10	94028506	94028890	5.458	2.032	5.813	5.751	0.372	1.065	1.054	0.037	0.989	0.911	yes	no	no	no	no	no	None	V	no	no	F	no	0	0	0	no
chr10	94049857	94052138	6.415	11.463	9.748	7.092	1.787	1.52	1.106	0.18	0.032	0.243	no	yes	no	no	no	yes	CPEB3	IX	no	no	I	no	0	0	0	no
chr10	94246429	94246841	4.759	5.805	6.166	7.809	1.22	1.296	1.641	0.739	0.451	0.031	no	no	yes	no	no	no	None	II	no	no	H	no	0	0	0	no
chr10	94459186	94459795	2.356	4.308	6.305	2.401	1.828	2.676	1.019	0.184	0.001	0.205	no	yes	no	no	no	no	None	IV	no	no	C	no	0	0	0	no
chr10	95522684	95522945	1.495	4.554	4.269	1.515	3.047	2.856	1.014	0.178	0.022	0.423	no	yes	no	no	no	no	None	VIII	no	no	C	no	0	0	0	no
chr10	95752915	95754040	7.005	9.709	8.193	3.837	1.386	1.17	0.548	0.153	0.5	0.024	no	no	yes	no	no	yes	PLCE1	IX	no	no	F	no	0	0	0	no
chr10	95830664	95830944	4.006	2.669	4.466	1.635	0.666	1.115	0.408	0.3	0.549	0.001	no	no	yes	no	no	no	None	VIII	no	yes	G	no	0	0	0	no
chr10	96039876	96040153	3.46	4.137	7.067	3.057	1.196	2.042	0.884	0.859	0.044	0.364	no	yes	no	no	no	no	None	IV	no	no	H	no	0	0	0	yes
chr10	97581468	97581881	2.534	3.849	5.046	3.214	1.519	1.991	1.268	0.262	0.001	0.512	no	yes	no	no	no	no	None	V	no	no	H	no	0	0	0	no
chr10	97889262	97890645	4.8	9.45	7.777	5.201	1.969	1.62	1.084	0.038	0.228	0.807	yes	no	no	no	no	yes	ZNF518A	II	no	no	C	no	0	0	0	no
chr10	97989353	97989636	3.88	6.973	3.675	3.427	1.797	0.947	0.883	0.038	0.241	0.232	yes	no	no	no	no	no	None	IV	no	no	I	yes	4.11455	12.1233	2.94645	yes
chr10	98130359	98130662	4.302	8.477	9.323	3.826	1.971	2.167	0.889	0.102	0.035	0.6	no	yes	no	no	no	no	None	IX	no	no	C	no	0	0	0	no
chr10	98432455	98433929	5.54	7.558	9.52	7.63	1.364	1.718	1.377	0.082	0.013	0.064	no	yes	no	no	no	no	None	IX	no	no	H	no	0	0	0	no
chr10	98503811	98504387	4.702	1.202	2.712	3.021	0.256	0.577	0.643	0.002	0.13	0.42	yes	no	no	no	no	no	None	VIII	no	no	G	yes	3.43661	4.48486	1.30502	no
chr10	98518235	98518570	6.18	4.375	6.924	5.023	0.708	1.12	0.813	0.25	0.304	0.002	no	no	yes	no	no	no	None	V	no	yes	G	no	0	0	0	no
chr10	98829734	98830143	2.387	4.386	3.147	1.425	1.838	1.319	0.597	0.05	0.2	0.184	yes	no	no	no	no	no	None	VIII	no	no	I	no	0	0	0	no
chr10	98958942	98959350	2.473	3.48	2.784	1.878	1.407	1.126	0.759	0.039	0.35	0.188	yes	no	no	no	no	no	None	VIII	no	no	I	no	0	0	0	no
chr10	99051433	99052664	3.296	5.983	4.66	2.681	1.815	1.414	0.813	0.029	0.347	0.254	yes	no	no	no	no	yes	ARHGAP19	IV	no	no	I	no	0	0	0	no
chr10	99077539	99082017	5.212	7.535	7.421	5.042	1.446	1.424	0.967	0.142	0.041	0.113	no	yes	no	no	no	yes	FRAT1	II	no	yes	I	no	0	0	0	no
chr10	99136163	99136642	2.987	5.979	6.928	5.936	2.002	2.32	1.987	0.154	0.194	0.04	no	no	yes	no	no	no	None	II	no	no	E	no	0	0	0	no
chr10	99167000	99169167	7.164	9.496	12.301	8.668	1.326	1.717	1.21	0.896	0.023	0.814	no	yes	no	no	no	no	None	I	no	yes	H	yes	4.70234	7.503	1.59559	no
chr10	99188161	99188602	3.324	3.504	5.601	3.754	1.054	1.685	1.129	0.9	0.047	0.192	no	yes	no	no	no	no	None	V	no	no	H	no	0	0	0	no
chr10	99313293	99313662	3.745	8.501	4.594	2.24	2.27	1.227	0.598	0.006	0.922	0.187	yes	no	no	no	no	no	None	IV	no	no	I	no	0	0	0	yes
chr10	99331970	99332400	4.799	8.255	8.097	5.824	1.72	1.687	1.214	0.151	0.02	0.984	no	yes	no	no	no	yes	ANKRD2	II	no	no	H	yes	5.47082	4.82985	0.882838	yes
chr10	99412312	99413449	7.121	6.293	7.383	6.295	0.884	1.037	0.884	0.304	0.19	0.03	no	no	yes	no	no	no	None	II	no	no	F	no	0	0	0	no
chr10	100082907	100083394	7.732	9.504	12.508	7.193	1.229	1.618	0.93	0.167	0.023	0.286	no	yes	no	no	no	no	None	I	no	no	F	no	0	0	0	no
chr10	100203884	100204619	11.733	13.578	14.111	11.159	1.157	1.203	0.951	0.111	0.049	0.09	no	yes	no	no	no	no	None	VI	no	no	F	no	0	0	0	no
chr10	101163459	101163896	5.639	9.751	10.888	1.878	1.729	1.931	0.333	0.009	0.018	0.002	yes	yes	yes	yes	no	no	None	IX	no	no	C	no	0	0	0	no
chr10	102016544	102017148	3.08	3.913	6.485	6.316	1.27	2.105	2.05	0.751	0.01	0.159	no	yes	no	no	no	no	None	V	no	no	E	no	0	0	0	no
chr10	102045756	102046840	3.543	9.084	6.483	3.262	2.564	1.83	0.921	0.034	0.541	0.898	yes	no	no	no	no	yes	BLOC1S2	IV	no	no	C	no	0	0	0	no
chr10	102241264	102242738	5.773	6.812	5.473	5.785	1.18	0.948	1.002	0.015	0.313	0.775	yes	no	no	no	no	no	None	II	no	no	F	no	0	0	0	no
chr10	102270471	102271244	3.874	2.454	1.372	2.825	0.634	0.354	0.729	0.494	0.001	0.205	no	yes	no	no	no	no	None	VIII	no	no	G	no	0	0	0	no
chr10	102295389	102296162	3.929	11.169	9.254	6.676	2.843	2.355	1.699	0.14	0.015	0.079	no	yes	no	no	no	yes	HIF1AN	IX	no	no	E	yes	4.85112	6.30513	1.29973	no
chr10	102639039	102639809	4.669	4.51	5.604	4.955	0.966	1.2	1.061	0.89	0.013	0.464	no	yes	no	yes	no	no	None	V	no	no	F	no	0	0	0	no
chr10	102654633	102655171	2.971	4.932	5.229	2.515	1.66	1.76	0.846	0.043	0.286	0.189	yes	no	no	yes	no	no	None	VIII	no	no	I	no	0	0	0	no
chr10	102777789	102779440	6.306	11.296	8.725	7.008	1.791	1.384	1.111	0.137	0.025	0.83	no	yes	no	yes	no	no	None	IX	no	no	I	yes	6.38225	8.10181	1.26943	no
chr10	102823013	102823886	0.976	4.781	6.056	2.829	4.896	6.201	2.898	0.102	0.038	0.245	no	yes	no	yes	no	no	None	IV	no	no	A	no	0	0	0	no
chr10	102890625	102891844	6.024	6.337	7.37	3.235	1.052	1.223	0.537	0.461	0.502	0.047	no	no	yes	yes	no	yes	TLX1NB	IV	no	no	F	no	0	0	0	no
chr10	102977234	102977591	3.011	7.317	5.215	3.123	2.43	1.732	1.037	0.01	0.478	0.931	yes	no	no	yes	no	no	None	IV	no	no	C	yes	3.56738	2.75991	0.773652	no
chr10	102982370	102983017	3.183	6.643	4.589	2.34	2.087	1.442	0.735	0.007	0.762	0.33	yes	no	no	yes	no	no	None	IV	no	no	I	no	0	0	0	no
chr10	103031959	103032309	4.393	7.543	9.146	2.24	1.717	2.082	0.51	0.05	0.124	0.213	yes	no	no	yes	no	no	None	IV	no	no	C	yes	5.80204	5.9228	1.02081	yes
chr10	103051320	103051749	1.507	4.733	8.021	1.153	3.141	5.323	0.765	0.212	0.045	0.423	no	yes	no	yes	no	no	None	IV	no	no	D	yes	3.19131	8.29192	2.59828	yes
chr10	103540860	103541238	3.928	6.499	7.173	3.826	1.654	1.826	0.974	0.042	0.245	0.583	yes	no	no	no	no	no	None	IV	no	no	I	yes	4.85112	7.94435	1.63763	yes
chr10	103576936	103578616	2.376	6.231	5.445	2.522	2.622	2.292	1.061	0.018	0.171	0.196	yes	no	no	no	no	yes	MGEA5	IV	no	no	C	no	0	0	0	no
chr10	103733844	103734921	5.091	4.047	5.047	3.369	0.795	0.991	0.662	0.046	0.652	0.376	yes	no	no	no	no	no	None	V	no	no	G	no	0	0	0	no
chr10	103873047	103875293	6.95	9.08	7.346	7.202	1.306	1.057	1.036	0.399	0.513	0.004	no	no	yes	no	no	yes	LDB1	IX	no	no	F	no	0	0	0	no
chr10	103877020	103877876	5.504	6.23	5.577	3.506	1.132	1.013	0.637	0.56	0.779	0.022	no	no	yes	no	no	no	None	IV	no	no	F	no	0	0	0	no
chr10	104163533	104163855	2.583	8.464	7.37	3.032	3.276	2.853	1.174	0.038	0.05	0.373	yes	no	no	no	no	no	None	IV	no	no	C	yes	5.17014	4.85488	0.939023	no
chr10	104167982	104169296	2.766	5.422	3.233	2.462	1.96	1.169	0.89	0.045	0.412	0.231	yes	no	no	no	no	yes	PSD	VIII	no	yes	I	no	0	0	0	no
chr10	104180426	104182932	7.778	11.525	10.168	7.626	1.482	1.307	0.98	0.033	0.132	0.615	yes	no	no	no	no	yes	FBXL15	IX	no	no	I	yes	6.85983	7.68499	1.12029	no
chr10	104227724	104228281	6.045	5.659	7.396	5.585	0.936	1.224	0.924	0.685	0.208	0.008	no	no	yes	no	no	no	None	II	no	yes	F	no	0	0	0	no
chr10	104503262	104504698	4.354	5.638	5.658	6.804	1.295	1.299	1.563	0.03	0.162	0.015	yes	no	yes	no	no	yes	WBP1L	V	no	no	H	no	0	0	0	no
chr10	104545417	104546009	5.563	5.942	7.755	7.179	1.068	1.394	1.29	0.547	0.009	0.345	no	yes	no	no	no	no	None	II	no	no	F	no	0	0	0	no
chr10	104956867	104957486	4.714	7.257	7.226	4.991	1.54	1.533	1.059	0.016	0.004	0.189	yes	yes	no	yes	no	no	None	II	no	no	I	no	0	0	0	no
chr10	105038526	105038908	3.697	5.744	8.516	1.606	1.554	2.303	0.434	0.071	0.013	0.184	no	yes	no	yes	no	no	None	IV	no	no	I	no	0	0	0	no
chr10	105201545	105202207	3.766	3.649	2.93	1.141	0.969	0.778	0.303	0.874	0.742	0.007	no	no	yes	yes	no	no	None	VIII	no	no	G	no	0	0	0	no
chr10	105211770	105212439	9.676	11.601	15.169	7.215	1.199	1.568	0.746	0.85	0.046	0.086	no	yes	no	yes	no	yes	CALHM2	VII	no	no	I	no	0	0	0	no
chr10	105245510	105245925	4.962	5.995	8.233	2.974	1.208	1.659	0.599	0.132	0.017	0.112	no	yes	no	yes	no	no	None	IV	no	no	I	yes	10.5803	4.53062	0.428214	yes
chr10	105314593	105315336	4.418	8.101	8.793	4.055	1.834	1.99	0.918	0.036	0.085	0.685	yes	no	no	yes	no	no	None	II	no	no	C	no	0	0	0	no
chr10	105454481	105457517	5.715	5.814	7.027	6.077	1.017	1.23	1.063	0.949	0.626	0.034	no	no	yes	yes	no	no	None	II	no	yes	F	yes	4.85112	2.83164	0.583709	no
chr10	105613321	105616438	2.372	5.763	5.369	5.37	2.43	2.264	2.264	0.007	0.021	0.244	yes	yes	no	no	no	yes	SH3PXD2A	V	no	no	E	no	0	0	0	no
chr10	105668070	105668517	3.165	6.917	5.738	3.488	2.185	1.813	1.102	0.049	0.178	0.188	yes	no	no	no	no	no	None	IV	no	no	C	no	0	0	0	no
chr10	106097242	106099540	4.881	7.373	8.359	5.81	1.51	1.713	1.19	0.049	0.62	0.842	yes	no	no	no	no	yes	ITPRIP	II	no	no	H	no	0	0	0	no
chr10	107477999	107478412	1.158	3.313	4.464	1.062	2.86	3.853	0.917	0.046	0.095	0.423	yes	no	no	yes	no	no	None	VIII	no	no	C	no	0	0	0	no
chr10	108717563	108718349	5.403	7.187	8.191	7.185	1.33	1.516	1.33	0.632	0.034	0.015	no	yes	yes	no	no	no	None	II	no	no	H	no	0	0	0	no
chr10	109445892	109446591	5.412	8.009	9.078	6.117	1.48	1.677	1.13	0.086	0.041	0.631	no	yes	no	no	no	no	None	IX	no	no	H	no	0	0	0	no
chr10	111643945	111644570	2.36	3.151	4.932	3.4	1.335	2.09	1.441	0.816	0.043	0.41	no	yes	no	no	no	no	None	VIII	no	no	H	yes	3.52675	6.91991	1.96212	yes
chr10	111766815	111768147	4.634	6.144	5.969	3.512	1.326	1.288	0.758	0.012	0.896	0.676	yes	no	no	no	no	yes	ADD3	IV	no	no	F	no	0	0	0	no
chr10	111916450	111917135	9.831	9.629	12.95	9.893	0.979	1.317	1.006	0.703	0.024	0.203	no	yes	no	no	no	no	None	I	no	no	F	no	0	0	0	no
chr10	111975467	111975996	5.619	7.321	8.53	8.503	1.303	1.518	1.513	0.21	0.015	0.513	no	yes	no	no	no	no	None	II	no	no	H	no	0	0	0	no
chr10	112194270	112194684	5.079	6.19	4.688	4.753	1.219	0.923	0.936	0.044	0.568	0.646	yes	no	no	no	no	no	None	V	no	no	F	no	0	0	0	no
chr10	112631263	112632762	4.848	7.237	9.746	4.646	1.493	2.01	0.958	0.051	0.007	0.415	no	yes	no	no	no	yes	PDCD4	II	no	no	C	no	0	0	0	no
chr10	114938947	114939416	6.092	9.135	10.312	8.114	1.499	1.693	1.332	0.274	0.027	0.811	no	yes	no	no	no	no	None	IX	no	no	H	no	0	0	0	no
chr10	115205401	115205781	3.064	5.014	6.083	4.641	1.637	1.985	1.515	0.014	0.203	0.519	yes	no	no	no	no	no	None	V	no	no	H	no	0	0	0	no
chr10	115438725	115440916	5.424	4.996	5.91	3.819	0.921	1.09	0.704	0.439	0.86	0.039	no	no	yes	no	no	yes	CASP7	V	no	no	F	yes	6.61363	8.29192	1.25376	no
chr10	115718269	115718842	7.992	9.624	10.393	5.222	1.204	1.3	0.653	0.196	0.189	0.045	no	no	yes	no	no	no	None	IX	no	no	F	no	0	0	0	no
chr10	115784388	115785498	5.495	6.056	8.335	7.24	1.102	1.517	1.317	0.639	0.041	0.662	no	yes	no	no	no	no	None	II	no	no	H	no	0	0	0	no
chr10	115933351	115934645	5.488	10.441	8.549	5.198	1.903	1.558	0.947	0.007	0.067	0.26	yes	no	no	no	no	yes	C10orf118	IX	no	no	I	no	0	0	0	no
chr10	118441886	118442215	3.452	7.351	4.755	3.485	2.129	1.377	1.009	0.002	0.218	0.243	yes	no	no	no	no	no	None	IV	no	no	C	yes	3.69376	9.47648	2.56554	yes
chr10	118501940	118502845	7.346	11.746	13.496	6.017	1.599	1.837	0.819	0.201	0.05	0.285	no	yes	no	no	no	yes	HSPA12A	VII	no	no	I	no	0	0	0	no
chr10	118763796	118765385	6.047	8.076	12.153	6.75	1.336	2.01	1.116	0.039	0.07	0.376	yes	no	no	no	no	yes	KIAA1598	IX	no	no	H	no	0	0	0	no
chr10	119213485	119215250	5.792	3.105	5.454	4.311	0.536	0.942	0.744	0.031	0.985	0.068	yes	no	no	no	no	no	None	V	no	no	G	no	0	0	0	no
chr10	120788371	120790467	7.062	14.404	9.031	6.77	2.04	1.279	0.959	0.049	0.134	0.189	yes	no	no	no	no	yes	NANOS1	IX	no	no	I	no	0	0	0	no
chr10	121119496	121120651	6.004	6.153	8.572	5.42	1.025	1.428	0.903	0.168	0.035	0.137	no	yes	no	no	yes	no	None	II	no	no	F	no	0	0	0	no
chr10	121164536	121165167	6.109	5.675	7.82	6.108	0.929	1.28	1	0.16	0.032	0.504	no	yes	no	no	yes	no	None	II	no	no	F	no	0	0	0	no
chr10	121176424	121176751	4.563	6.339	8.216	3.125	1.389	1.8	0.685	0.251	0.025	0.425	no	yes	no	no	yes	no	None	IV	no	no	I	no	0	0	0	yes
chr10	121190716	121191482	8.753	12.148	13.848	8.513	1.388	1.582	0.973	0.232	0.036	0.603	no	yes	no	no	yes	no	None	VII	no	no	I	no	0	0	0	no
chr10	121248879	121249638	2.931	6.121	5.966	5.426	2.088	2.035	1.851	0.009	0.154	0.23	yes	no	no	no	yes	no	None	IV	no	yes	E	yes	4.70234	8.8842	1.88931	no
chr10	121377880	121378609	5.893	6.826	8.231	4.486	1.158	1.397	0.761	0.831	0.011	0.455	no	yes	no	no	yes	no	None	II	no	no	F	no	0	0	0	no
chr10	121393339	121394051	2.987	2.89	5.485	3.666	0.968	1.836	1.228	0.438	0	0.291	no	yes	no	no	yes	no	None	V	no	no	H	no	0	0	0	no
chr10	121441024	121442081	12.643	11.805	15.656	10.469	0.934	1.238	0.828	0.268	0.323	0.035	no	no	yes	no	yes	no	None	VI	no	yes	F	no	0	0	0	no
chr10	121463988	121464821	4.889	5.907	5.95	5.954	1.208	1.217	1.218	0.806	0.012	0.531	no	yes	no	no	yes	no	None	II	no	no	F	no	0	0	0	no
chr10	121631226	121633559	8.32	13.49	14.165	7.001	1.621	1.702	0.841	0.158	0.02	0.284	no	yes	no	no	yes	yes	MCMBP	VII	no	no	I	no	0	0	0	no
chr10	122828006	122829101	9.661	9.225	9.737	7.895	0.955	1.008	0.817	0.371	0.06	0.039	no	no	yes	no	no	no	None	IX	no	no	F	no	0	0	0	no
chr10	123907962	123908934	6.592	7.736	8.996	7.067	1.174	1.365	1.072	0.552	0.04	0.818	no	yes	no	no	no	no	None	IX	no	no	F	no	0	0	0	no
chr10	124058268	124058638	3.78	4.767	7.745	3.959	1.261	2.049	1.047	0.216	0.033	0.359	no	yes	no	no	no	no	None	IV	no	no	H	yes	6.0423	8.8842	1.47033	yes
chr10	124767386	124769111	10.221	11.131	11.449	13.417	1.089	1.12	1.313	0.26	0.693	0.016	no	no	yes	no	no	yes	IKZF5	I	no	no	F	no	0	0	0	yes
chr10	125286189	125286997	4.44	5.831	5.263	4.51	1.314	1.185	1.016	0.403	0.965	0.002	no	no	yes	no	no	no	None	V	no	no	F	no	0	0	0	no
chr10	125753849	125754900	3.013	5.908	4.536	1.58	1.961	1.506	0.525	0.019	0.731	0.194	yes	no	no	no	no	no	None	VIII	no	no	I	yes	4.11455	9.23682	2.24492	yes
chr10	126316654	126317597	5.653	5.289	7.652	4.673	0.936	1.353	0.827	0.936	0.197	0.048	no	no	yes	no	no	no	None	II	no	no	F	no	0	0	0	no
chr10	126409833	126410784	4.768	4.593	6.18	6.18	0.963	1.296	1.296	0.172	0.365	0.006	no	no	yes	no	no	no	None	V	no	no	F	no	0	0	0	no
chr10	126753271	126754133	3.689	4.033	7.906	5.275	1.093	2.143	1.43	0.026	0.048	0.206	yes	yes	no	no	no	no	None	V	no	no	H	no	0	0	0	no
chr10	127407397	127408458	11.925	20.58	17.534	11.219	1.726	1.47	0.941	0.103	0.03	0.836	no	yes	no	no	no	yes	FLJ37035	VI	no	no	I	no	0	0	0	no
chr10	127790345	127790705	7.179	7.855	8.679	6.598	1.094	1.209	0.919	0.657	0.042	0.192	no	yes	no	no	no	no	None	IX	no	no	F	no	0	0	0	no
chr10	129678704	129680248	5.77	4.953	5.442	5.735	0.858	0.943	0.994	0.007	0.802	0.174	yes	no	no	no	no	no	None	V	no	no	F	no	0	0	0	no
chr10	129833796	129834146	3.99	6.685	6.248	3.586	1.675	1.566	0.899	0.011	0.305	0.225	yes	no	no	no	no	no	None	IV	no	yes	I	yes	2.64607	7.10736	2.68601	yes
chr10	129862034	129863752	9.282	9.158	11.674	7.427	0.987	1.258	0.8	0.296	0.029	0.01	no	yes	yes	no	no	no	None	I	no	no	F	no	0	0	0	no
chr10	129976645	129976956	2.933	5.353	6.401	4.592	1.825	2.183	1.566	0.036	0.181	0.231	yes	no	no	no	no	no	None	IV	no	no	E	yes	4.70234	5.29623	1.1263	no
chr10	130008440	130009365	5.753	10.198	7.185	3.746	1.773	1.249	0.651	0.041	0.943	0.242	yes	no	no	no	no	no	None	II	no	no	I	yes	3.52675	9.81413	2.78277	no
chr10	130888831	130889447	6.194	6.181	10.184	5.099	0.998	1.644	0.823	0.923	0.016	0.445	no	yes	no	no	no	no	None	II	no	no	F	no	0	0	0	no
chr10	133575458	133576196	5.309	7.353	5.873	1.787	1.385	1.106	0.337	0.033	0.042	0.04	yes	yes	yes	yes	no	no	None	IV	no	no	F	no	0	0	0	no
chr10	134042965	134044158	5.437	7.12	8.905	3.735	1.31	1.638	0.687	0.135	0.006	0.226	no	yes	no	yes	no	no	None	II	no	no	I	no	0	0	0	no
chr10	134062394	134062827	5.545	8.691	7.215	2.872	1.567	1.301	0.518	0.144	0.027	0.098	no	yes	no	yes	no	no	None	IV	no	yes	I	no	0	0	0	no
chr10	134143225	134144221	5.121	5.006	6.648	3.951	0.977	1.298	0.772	0.011	0.195	0.493	yes	no	no	no	no	no	None	V	no	no	F	no	0	0	0	no
chr10	134198611	134200415	5.822	5.481	8.311	6.881	0.942	1.427	1.182	0.545	0.04	0.132	no	yes	no	no	no	no	None	II	no	no	F	no	0	0	0	no
chr10	135066955	135067456	4.203	5.054	4.434	3.765	1.203	1.055	0.896	0.126	0.037	0.216	no	yes	no	no	no	no	None	V	no	no	F	no	0	0	0	no
chr10	135070900	135071541	11.127	13.825	12.38	6.901	1.242	1.113	0.62	0.059	0.241	0.043	no	no	yes	no	no	no	None	VII	no	no	F	no	0	0	0	yes
chr10	135170204	135171928	5.961	10.924	9.112	5.082	1.833	1.529	0.853	0.113	0.036	0.419	no	yes	no	no	no	yes	FUOM	IX	no	no	I	no	0	0	0	no
chr11	267053	269965	5.764	7.472	10.395	5.631	1.296	1.803	0.977	0.047	0.139	0.163	yes	no	no	no	no	no	None	IX	no	no	H	no	0	0	0	no
chr11	568311	569127	15.477	26.827	26.531	16.772	1.733	1.714	1.084	0.205	0.019	0.866	no	yes	no	no	no	yes	MIR210	III	no	no	C	no	0	0	0	no
chr11	712740	713231	3.966	6.761	6.017	3.394	1.705	1.517	0.856	0.012	0.232	0.191	yes	no	no	no	no	no	None	IV	no	no	I	no	0	0	0	no
chr11	727602	728829	6.094	7.202	8.342	3.362	1.182	1.369	0.552	0.525	0.975	0.043	no	no	yes	no	no	no	None	II	no	no	F	yes	3.43661	11.6317	3.38463	yes
chr11	808447	811211	9.937	7.079	8.01	5.58	0.712	0.806	0.562	0.151	0.622	0.04	no	no	yes	no	no	yes	RPLP2	II	no	no	G	no	0	0	0	no
chr11	859576	860160	5.642	11.327	7.451	1.528	2.008	1.321	0.271	0.014	0.919	0.2	yes	no	no	no	no	no	None	II	no	no	I	no	0	0	0	no
chr11	1627180	1627476	3.525	5.994	4.69	3.405	1.701	1.331	0.966	0.047	0.466	0.384	yes	no	no	no	no	no	None	IV	no	no	I	no	0	0	0	no
chr11	1903665	1904000	3.342	8.688	7.82	4.702	2.6	2.34	1.407	0.029	0.015	0.884	yes	yes	no	no	no	no	None	II	no	no	E	yes	5.09189	8.65952	1.70065	yes
chr11	2023005	2024408	2.742	5.28	4.794	2.851	1.926	1.749	1.04	0.008	0.591	0.184	yes	no	no	no	no	no	None	IV	no	no	C	yes	7.49719	5.9228	0.790003	no
chr11	2123850	2124362	4.345	7.513	7.687	4.128	1.729	1.769	0.95	0.007	0.162	0.505	yes	no	no	no	no	no	None	II	no	no	I	no	0	0	0	no
chr11	2177722	2178029	4.677	7.535	5.151	2.059	1.611	1.101	0.44	0.257	0.752	0.043	no	no	yes	no	no	no	None	IV	no	no	I	yes	3.79144	5.17484	1.36487	yes
chr11	2218465	2218824	7.541	10.353	8.782	4.706	1.373	1.164	0.624	0.355	0.542	0.037	no	no	yes	no	no	no	None	IX	no	no	F	yes	7.6413	7.69964	1.00763	no
chr11	2315110	2315546	6.453	8.731	9.668	6.956	1.353	1.498	1.078	0.031	0.084	0.112	yes	no	no	no	no	no	None	IX	no	no	H	no	0	0	0	yes
chr11	2488331	2488987	8.366	10.795	9.096	6.911	1.29	1.087	0.826	0.127	0.029	0.333	no	yes	no	no	no	no	None	IX	no	no	F	no	0	0	0	no
chr11	2531748	2534310	5.246	6.485	10.62	5.159	1.236	2.024	0.983	0.047	0.101	0.092	yes	no	no	no	no	no	None	II	no	no	H	no	0	0	0	no
chr11	2905032	2907877	7.491	11.266	9.126	7.652	1.504	1.218	1.021	0.047	0.619	0.898	yes	no	no	no	no	yes	CDKN1C	IX	no	no	I	no	0	0	0	no
chr11	2919647	2921503	8.085	12.751	12.331	11.148	1.577	1.525	1.379	0.079	0.046	0.141	no	yes	no	no	no	yes	SLC22A18	I	no	no	H	no	0	0	0	no
chr11	2966614	2966932	2.825	5.268	5.384	3.895	1.865	1.905	1.379	0.013	0.226	0.259	yes	no	no	no	no	no	None	V	no	no	C	no	0	0	0	no
chr11	3036537	3037598	2.966	7.62	8.287	3.959	2.569	2.794	1.335	0.002	0.101	0.394	yes	no	no	no	no	no	None	IV	no	no	E	no	0	0	0	no
chr11	3043574	3044338	6.041	6.471	8.375	8.245	1.071	1.386	1.365	0.651	0.016	0.105	no	yes	no	no	no	no	None	II	no	no	F	no	0	0	0	no
chr11	3057611	3058883	4.116	7.013	5.993	4.485	1.704	1.456	1.09	0.091	0.002	0.328	no	yes	no	no	no	no	None	IV	no	no	I	yes	8.01875	9.81413	1.2239	no
chr11	3121619	3122294	3.256	6.935	7.412	5.549	2.13	2.277	1.704	0.068	0.047	0.514	no	yes	no	no	no	no	None	II	no	no	E	no	0	0	0	no
chr11	3443634	3444523	5.391	6.217	6.912	2.869	1.153	1.282	0.532	0.426	0.616	0.047	no	no	yes	no	no	no	None	IV	no	no	F	no	0	0	0	no
chr11	3882947	3883307	3.79	3.341	4.898	1.606	0.881	1.293	0.424	0.233	0.019	0.002	no	yes	yes	no	no	no	None	VIII	no	no	F	no	0	0	0	no
chr11	3915281	3916004	2.083	3.569	4.869	3.422	1.713	2.337	1.642	0.066	0	0.184	no	yes	no	no	no	no	None	VIII	no	no	E	no	0	0	0	no
chr11	4113135	4113739	5.19	7.844	9.234	5.171	1.511	1.779	0.996	0.021	0.056	0.319	yes	no	no	no	no	no	None	II	no	no	H	no	0	0	0	no
chr11	4414385	4415392	9.251	13.885	15.88	12.819	1.501	1.716	1.386	0.032	0.223	0.325	yes	no	no	no	no	yes	TRIM21	VI	no	no	H	no	0	0	0	no
chr11	6033322	6033659	4.422	6.847	6.798	5.358	1.548	1.537	1.212	0.309	0.024	0.485	no	yes	no	no	no	no	None	II	no	no	H	no	0	0	0	no
chr11	6178145	6178830	1.232	6.117	7	1.832	4.964	5.68	1.487	0.044	0.041	0.423	yes	yes	no	no	no	no	None	IV	no	no	D	no	0	0	0	no
chr11	6220412	6223139	4.432	7.174	5.917	6.36	1.619	1.335	1.435	0.018	0.168	0.02	yes	no	yes	no	no	yes	OR52W1	II	no	no	I	no	0	0	0	no
chr11	6255564	6256838	6.297	9.991	7.209	4.817	1.587	1.145	0.765	0.309	0.073	0.006	no	no	yes	no	no	yes	FAM160A2	IX	no	no	I	no	0	0	0	no
chr11	6341223	6342566	6.105	6.873	9.671	5.919	1.126	1.584	0.969	0.056	0.04	0.485	no	yes	no	no	no	yes	PRKCDBP	II	no	no	F	no	0	0	0	no
chr11	6384334	6384643	3.745	8.665	10.866	4.417	2.314	2.901	1.179	0.006	0.064	0.524	yes	no	no	no	no	no	None	IX	no	no	C	yes	6.17416	7.69964	1.24707	yes
chr11	6411140	6412519	15.239	14.94	18.155	10.139	0.98	1.191	0.665	0.485	0.394	0.044	no	no	yes	no	no	yes	SMPD1	VI	no	no	F	no	0	0	0	no
chr11	6638378	6640178	6.206	5.701	8.129	5.561	0.919	1.31	0.896	0.245	0.002	0.056	no	yes	no	no	no	no	None	II	no	no	F	no	0	0	0	no
chr11	6640582	6640872	1.534	3.03	3.187	1.599	1.976	2.078	1.042	0.001	0.001	0.208	yes	yes	no	no	no	yes	TPP1	VIII	no	no	C	no	0	0	0	no
chr11	6656003	6657640	6.313	6.181	10.214	5.447	0.979	1.618	0.863	0.728	0.035	0.306	no	yes	no	no	no	no	None	II	no	no	F	no	0	0	0	no
chr11	7598902	7599622	3.445	2.629	4.304	2.412	0.763	1.249	0.7	0.501	0.019	0.321	no	yes	no	no	no	no	None	VIII	no	no	G	no	0	0	0	no
chr11	8228216	8228670	1.764	1.518	5.674	3.166	0.861	3.217	1.795	0.928	0.01	0.198	no	yes	no	no	no	no	None	VIII	no	no	E	no	0	0	0	no
chr11	8244329	8244864	4.008	4.703	5.621	1.787	1.173	1.402	0.446	0.78	0.142	0.004	no	no	yes	no	no	no	None	IV	no	no	F	no	0	0	0	no
chr11	8353702	8354290	4.369	8.266	7.545	4.911	1.892	1.727	1.124	0.076	0.012	0.668	no	yes	no	no	no	no	None	II	no	no	C	no	0	0	0	no
chr11	8726609	8727085	4.208	3.808	5.806	2.792	0.905	1.38	0.664	0.98	0.014	0.432	no	yes	no	no	no	no	None	V	no	no	F	no	0	0	0	no
chr11	9285312	9287295	6.924	13.173	10.153	6.341	1.902	1.466	0.916	0.176	0.027	0.283	no	yes	no	no	no	yes	DENND5A	IX	no	no	I	no	0	0	0	no
chr11	9385097	9386493	11.157	16.266	13.522	8.359	1.458	1.212	0.749	0.214	0.05	0.211	no	yes	no	no	no	no	None	VII	no	no	I	no	0	0	0	no
chr11	9481300	9484001	4.247	5.093	6.489	4.384	1.199	1.528	1.032	0.154	0.031	0.583	no	yes	no	no	no	yes	LOC644656	V	no	no	F	no	0	0	0	no
chr11	9573370	9573950	3.579	5.176	6.13	2.608	1.446	1.713	0.729	0.12	0.029	0.108	no	yes	no	no	no	no	None	IV	no	no	I	no	0	0	0	no
chr11	9622887	9623427	10.182	12.121	14.14	10.898	1.19	1.389	1.07	0.778	0.038	0.889	no	yes	no	no	no	no	None	I	no	no	F	no	0	0	0	no
chr11	9634815	9636109	4.57	11.364	6.475	4.921	2.487	1.417	1.077	0.048	0.405	0.793	yes	no	no	no	no	no	None	II	no	no	C	yes	3.2958	11.7953	3.57889	no
chr11	10626030	10626399	1.122	3.468	4.978	1.648	3.092	4.437	1.469	0.226	0.047	0.423	no	yes	no	no	no	no	None	VIII	no	no	D	no	0	0	0	no
chr11	10644831	10645325	2.583	5.57	4.651	1.968	2.156	1.8	0.762	0.054	0.026	0.192	no	yes	no	no	no	no	None	VIII	no	no	C	no	0	0	0	yes
chr11	10662769	10663876	5.976	8.078	8.471	6.709	1.352	1.418	1.123	0.345	0.024	0.718	no	yes	no	no	no	no	None	IX	no	no	H	no	0	0	0	no
chr11	10813991	10814516	5.32	9.381	9.705	4.428	1.763	1.824	0.832	0.171	0.045	0.55	no	yes	no	no	no	no	None	IX	no	no	I	yes	3.8451	6.17894	1.60696	yes
chr11	11444942	11445259	1.327	3.445	6.237	2.441	2.596	4.701	1.84	0.423	0	0.713	no	yes	no	yes	no	no	None	VIII	no	no	B	no	0	0	0	no
chr11	11642626	11644061	12.478	17.36	21.01	13.983	1.391	1.684	1.121	0.273	0.022	0.785	no	yes	no	yes	no	yes	GALNT18	VI	no	no	H	no	0	0	0	no
chr11	11870411	11871201	5.148	3.411	6.081	5.324	0.663	1.181	1.034	0.01	0.041	0.957	yes	yes	no	no	no	no	None	V	no	no	F	yes	4.48079	3.53082	0.787991	yes
chr11	12065870	12066371	5.191	6.396	7.325	3.493	1.232	1.411	0.673	0.234	0.06	0.041	no	no	yes	no	no	no	None	II	no	no	I	yes	5.29013	6.92762	1.30954	yes
chr11	12088369	12088875	6.061	8.478	9.163	5.775	1.399	1.512	0.953	0.05	0.039	0.327	no	yes	no	no	no	no	None	IX	no	no	I	no	0	0	0	no
chr11	12111576	12112081	8.491	9.141	12.592	8.734	1.077	1.483	1.029	0.628	0.024	0.53	no	yes	no	no	no	no	None	I	no	no	F	no	0	0	0	no
chr11	12184815	12186052	2.747	6.742	4.438	4.049	2.455	1.616	1.474	0.018	0.204	0.43	yes	no	no	no	no	no	None	IV	no	no	C	no	0	0	0	no
chr11	12695387	12697064	13.145	16.772	13.637	12.248	1.276	1.037	0.932	0.004	0.992	0.1	yes	no	no	no	no	yes	TEAD1	VI	no	no	F	no	0	0	0	no
chr11	12745940	12746354	3.427	4.028	7.244	3.879	1.175	2.114	1.132	0.459	0.041	0.347	no	yes	no	no	no	no	None	V	no	no	H	no	0	0	0	no
chr11	12831113	12832316	3.414	3.763	3.652	1.399	1.102	1.07	0.41	0.919	0.62	0.025	no	no	yes	no	no	no	None	VIII	no	yes	F	no	0	0	0	no
chr11	12985565	12986045	3.525	7.685	8.477	3.325	2.18	2.405	0.943	0.032	0.051	0.33	yes	no	no	no	no	no	None	IV	no	yes	C	yes	5.65766	8.65952	1.53058	yes
chr11	13147675	13148465	5.743	4.101	5.232	4.194	0.714	0.911	0.73	0.139	0.938	0.009	no	no	yes	no	no	no	None	V	no	no	G	no	0	0	0	no
chr11	13161763	13162226	3.495	4.806	3.944	1.425	1.375	1.128	0.408	0.025	0.574	0.001	yes	no	yes	no	no	no	None	VIII	no	no	F	no	0	0	0	no
chr11	14379432	14381305	6.186	12.289	9.157	5.816	1.987	1.48	0.94	0.195	0.009	0.22	no	yes	no	no	no	yes	RRAS2	IX	no	no	I	no	0	0	0	no
chr11	15273888	15274279	3.819	3.81	2.015	1.292	0.998	0.528	0.338	0.468	0.011	0.178	no	yes	no	no	no	no	None	VIII	no	no	G	no	0	0	0	no
chr11	15349282	15349593	4.229	4.869	6.966	4.119	1.151	1.647	0.974	0.201	0.011	0.866	no	yes	no	no	no	no	None	V	no	no	F	yes	7.6413	5.85531	0.766271	no
chr11	15598891	15599606	1.238	2.405	4.81	2.564	1.943	3.886	2.071	0.989	0.032	0.608	no	yes	no	no	no	no	None	VIII	no	no	E	no	0	0	0	no
chr11	15610500	15611581	5.418	4.991	5.336	5.196	0.921	0.985	0.959	0.185	0.009	0.15	no	yes	no	no	no	no	None	V	no	no	F	no	0	0	0	no
chr11	15657917	15658772	4.056	4.593	6.194	5.718	1.132	1.527	1.41	0.701	0.004	0.244	no	yes	no	no	no	no	None	V	no	no	H	no	0	0	0	no
chr11	16635186	16635906	7.798	12.051	13.954	7.77	1.545	1.79	0.996	0.18	0.044	0.771	no	yes	no	no	no	no	None	VII	no	no	I	yes	5.29214	5.29623	1.00077	no
chr11	16759718	16760958	4.278	7.621	6.71	5.6	1.782	1.569	1.309	0.084	0.004	0.017	no	yes	yes	no	no	yes	C11orf58	II	no	no	H	no	0	0	0	no
chr11	16828352	16829677	5.271	4.682	7.024	6.173	0.888	1.332	1.171	0.209	0.013	0.736	no	yes	no	no	no	no	None	II	no	no	F	no	0	0	0	no
chr11	17084747	17085328	5.012	6.845	9.743	2.829	1.366	1.944	0.565	0.124	0.038	0.287	no	yes	no	no	no	no	None	II	no	no	H	yes	5.15491	3.79488	0.736168	yes
chr11	17098217	17100727	5.718	6.731	6.316	6.017	1.177	1.105	1.052	1	0.029	0.016	no	yes	yes	no	no	yes	RPS13	II	no	no	F	no	0	0	0	no
chr11	17407884	17408742	7.9	7.249	13.751	6.859	0.918	1.741	0.868	0.376	0.01	0.447	no	yes	no	yes	no	no	None	I	no	no	F	no	0	0	0	no
chr11	17549688	17550083	5.799	6.079	5.178	3.517	1.048	0.893	0.607	0.114	0.435	0.014	no	no	yes	yes	no	no	None	IV	no	no	G	yes	8.59151	7.06165	0.821934	yes
chr11	17584912	17585223	1.59	6.706	5.742	2.502	4.217	3.611	1.573	0.049	0.19	0.933	yes	no	no	yes	no	no	None	IV	no	no	D	no	0	0	0	no
chr11	18000127	18000614	2.925	6.452	4.385	3.144	2.206	1.499	1.075	0.018	0.513	0.741	yes	no	no	yes	no	no	None	IV	no	yes	C	no	0	0	0	yes
chr11	18791243	18791674	7.055	6.169	7.741	5.083	0.874	1.097	0.721	0.826	0.417	0.038	no	no	yes	no	no	no	None	II	no	no	G	no	0	0	0	no
chr11	18797154	18797584	4.552	6.16	6.552	2.106	1.353	1.439	0.463	0.173	0.163	0.036	no	no	yes	no	no	no	None	IV	no	no	I	yes	3.96036	7.94435	2.00597	yes
chr11	19138404	19139432	12.925	15.801	15.993	14.36	1.223	1.237	1.111	0.104	0.028	0.363	no	yes	no	no	no	yes	ZDHHC13	VI	no	no	F	yes	3.52675	10.661	3.02291	no
chr11	22213845	22215496	4.824	5.62	6.179	5.069	1.165	1.281	1.051	0.279	0.132	0.043	no	no	yes	no	no	yes	ANO5	II	no	no	F	no	0	0	0	no
chr11	22359175	22359502	3.87	8.099	8.313	4.247	2.093	2.148	1.097	0.01	0.036	0.457	yes	yes	no	no	no	yes	SLC17A6	IV	no	no	C	no	0	0	0	no
chr11	26353451	26353847	5.339	6.963	8.357	2.411	1.304	1.565	0.452	0.111	0.033	0.02	no	yes	yes	no	no	yes	ANO3	II	no	no	I	yes	3.08708	4.76577	1.54378	no
chr11	27444713	27445139	1.607	4.174	8.324	2.112	2.598	5.181	1.314	0.941	0.043	0.423	no	yes	no	no	no	no	None	VIII	no	no	B	no	0	0	0	no
chr11	27492638	27494647	5.998	7.116	7.268	5.748	1.186	1.212	0.958	0.146	0.007	0.1	no	yes	no	no	no	yes	LGR4	II	no	no	F	no	0	0	0	yes
chr11	29548877	29549509	5.239	4.267	5.444	4.132	0.814	1.039	0.789	0.269	0.154	0.016	no	no	yes	no	no	no	None	V	no	no	G	yes	4.70234	2.75991	0.586923	no
chr11	30606812	30608536	4.296	7.528	6.993	4.927	1.752	1.628	1.147	0.248	0.021	0.2	no	yes	no	no	no	yes	MPPED2	II	no	no	I	no	0	0	0	no
chr11	32028452	32028755	2.913	6.232	4.196	5.709	2.139	1.44	1.96	0.433	0.184	0.005	no	no	yes	no	no	no	None	V	no	no	E	yes	4.41011	8.29192	1.88021	yes
chr11	32112239	32114197	5.404	7.057	8.603	4.582	1.306	1.592	0.848	0.223	0.005	0.014	no	yes	yes	no	no	yes	RCN1	II	no	no	I	no	0	0	0	no
chr11	32197758	32198038	1.869	2.441	4.846	1.829	1.306	2.592	0.978	0.237	0.005	0.427	no	yes	no	no	no	no	None	VIII	no	no	H	no	0	0	0	yes
chr11	32850746	32852290	10.028	14.029	11.575	8.206	1.399	1.154	0.818	0.138	0.436	0.03	no	no	yes	no	no	yes	PRRG4	VII	no	no	I	no	0	0	0	no
chr11	32868989	32869439	5.521	2.926	5.004	6.376	0.53	0.906	1.155	0.151	0.336	0.01	no	no	yes	no	no	no	None	V	no	no	G	no	0	0	0	no
chr11	32873735	32874302	2.489	3.832	4.301	4.263	1.54	1.728	1.713	0.449	0.28	0.026	no	no	yes	no	no	no	None	V	no	no	H	no	0	0	0	no
chr11	33060481	33062350	6.353	13.581	17.833	8.333	2.138	2.807	1.312	0.161	0.13	0.009	no	no	yes	no	no	yes	TCP11L1	VII	no	no	E	no	0	0	0	no
chr11	33086031	33086456	5.044	3.513	5.918	4.498	0.696	1.173	0.892	0.446	0.009	0.328	no	yes	no	no	no	no	None	V	no	no	F	no	0	0	0	no
chr11	33087137	33087509	4.616	8.336	9.995	3.485	1.806	2.165	0.755	0.136	0.023	0.391	no	yes	no	no	no	no	None	IX	no	no	C	yes	2.93896	8.65952	2.94646	yes
chr11	33182681	33183713	13.173	18.79	22.695	13.05	1.426	1.723	0.991	0.234	0.03	0.307	no	yes	no	no	no	yes	CSTF3	III	no	no	H	no	0	0	0	no
chr11	33921600	33922428	4.532	5.12	6.206	4.825	1.13	1.369	1.065	0.88	0.046	0.854	no	yes	no	no	no	no	None	V	no	no	F	no	0	0	0	no
chr11	34169889	34170450	5.509	4.779	8.784	4.643	0.867	1.595	0.843	0.314	0.004	0.152	no	yes	no	no	no	no	None	II	no	no	F	no	0	0	0	no
chr11	34290122	34291283	5.225	5.661	6.486	7.012	1.083	1.241	1.342	0.039	0.139	0.18	yes	no	no	no	no	no	None	II	no	no	F	no	0	0	0	no
chr11	34454383	34454860	5.99	7.072	8.953	5.901	1.181	1.495	0.985	0.028	0.064	0.365	yes	no	no	no	no	no	None	II	no	no	F	no	0	0	0	no
chr11	34485777	34486436	4.017	2.825	3.06	1.58	0.703	0.762	0.393	0.272	0.315	0.043	no	no	yes	no	no	no	None	VIII	no	no	G	no	0	0	0	no
chr11	34534425	34534740	3.641	6.163	6.674	2.635	1.693	1.833	0.724	0.126	0.008	0.003	no	yes	yes	no	no	no	None	IV	no	no	I	yes	8.96707	4.82985	0.538621	yes
chr11	35071628	35072551	5.503	5.817	7.912	8.012	1.057	1.438	1.456	0.446	0.044	0.69	no	yes	no	no	no	no	None	II	no	no	H	no	0	0	0	no
chr11	35103983	35104473	3.39	3.607	4.455	1.612	1.064	1.314	0.475	0.464	0.345	0.032	no	no	yes	no	no	no	None	VIII	no	no	F	no	0	0	0	no
chr11	35160181	35161858	5.121	7.638	5.891	1.615	1.492	1.15	0.315	0.083	0.915	0.031	no	no	yes	no	no	yes	CD44	IV	no	no	I	no	0	0	0	no
chr11	35683605	35685287	7.227	11.68	8.761	5.52	1.616	1.212	0.764	0.11	0.609	0.017	no	no	yes	no	no	yes	TRIM44	IX	no	no	I	no	0	0	0	no
chr11	36199391	36199769	1.103	3.548	6.161	5.847	3.216	5.584	5.3	0.931	0.03	0.048	no	yes	yes	yes	no	no	None	V	no	no	A	no	0	0	0	no
chr11	36287557	36287898	5.56	6.688	5.861	1.878	1.203	1.054	0.338	0.108	0.652	0.027	no	no	yes	yes	no	no	None	IV	no	no	F	yes	3.08708	5.33052	1.72672	yes
chr11	36432692	36433356	7.26	10.98	12.843	9.306	1.512	1.769	1.282	0.146	0.031	0.476	no	yes	no	yes	no	no	None	I	no	no	H	no	0	0	0	no
chr11	39801673	39802514	5.422	4.368	1.05	3.236	0.806	0.194	0.597	0.178	0.027	0.25	no	yes	no	yes	no	no	None	V	no	no	G	no	0	0	0	no
chr11	41519208	41519866	5.641	6.115	5.319	4.695	1.084	0.943	0.832	0.772	0.587	0.01	no	no	yes	no	no	no	None	V	no	no	F	no	0	0	0	no
chr11	43333124	43334158	8.044	12.917	14.743	7.721	1.606	1.833	0.96	0.228	0.005	0.185	no	yes	no	no	no	yes	API5	VII	no	no	I	yes	6.61517	6.51508	0.98487	no
chr11	43598615	43598911	5.473	7.25	7.527	3.049	1.325	1.375	0.557	0.032	0.663	0.223	yes	no	no	no	no	no	None	II	no	no	I	no	0	0	0	no
chr11	43901751	43902899	9.054	8.493	11.247	6.71	0.938	1.242	0.741	0.525	0.031	0.027	no	yes	yes	no	no	yes	ALKBH3	IX	no	no	F	no	0	0	0	no
chr11	44131816	44132099	2.775	3.221	6.741	4.759	1.161	2.43	1.715	0.225	0	0.486	no	yes	no	no	no	no	None	V	no	no	E	yes	3.52675	6.92762	1.96431	no
chr11	44322383	44323879	4.241	7.674	6.818	4.633	1.81	1.608	1.092	0.005	0.574	0.817	yes	no	no	no	no	no	None	IV	no	no	I	no	0	0	0	no
chr11	44343671	44344760	2.411	4.103	5.397	4.605	1.702	2.239	1.91	0.323	0.012	0.438	no	yes	no	no	no	no	None	V	no	no	E	no	0	0	0	no
chr11	44419896	44420426	3.818	7.501	5.129	4.062	1.965	1.343	1.064	0.034	0.405	0.977	yes	no	no	no	no	no	None	IV	no	no	I	no	0	0	0	no
chr11	44545083	44545862	5.365	6.424	8.223	2.965	1.197	1.533	0.553	0.86	0.071	0.034	no	no	yes	no	no	no	None	II	no	no	I	yes	4.41445	9.47648	2.1467	no
chr11	44580570	44581709	7.029	8.681	9.535	7.829	1.235	1.356	1.114	0.242	0.102	0.033	no	no	yes	no	no	no	None	IX	no	no	F	no	0	0	0	no
chr11	44975795	44977294	11.731	13.18	8.584	10.999	1.124	0.732	0.938	0.191	0.012	0.042	no	yes	yes	no	no	no	None	VII	no	no	F	no	0	0	0	no
chr11	45361369	45362201	8.722	14.034	12.178	9.098	1.609	1.396	1.043	0.157	0.047	0.588	no	yes	no	no	no	no	None	VII	no	no	I	yes	3.9691	10.661	2.68601	yes
chr11	45392400	45393107	4.514	4.657	4.76	3.766	1.032	1.055	0.834	0.047	0.062	0.018	yes	no	yes	no	no	no	None	V	no	no	F	yes	7.49719	10.661	1.422	yes
chr11	45540085	45541083	2.656	3.707	8.091	8.861	1.396	3.047	3.337	0.685	0.008	0.047	no	yes	yes	no	no	no	None	II	yes	no	B	no	0	0	0	no
chr11	45686219	45687785	2.656	5.181	5.21	1.277	1.951	1.962	0.481	0.015	0.13	0.779	yes	no	no	no	no	yes	CHST1	VIII	no	no	C	no	0	0	0	no
chr11	45864730	45865536	3.57	6.833	6.148	4.671	1.914	1.722	1.309	0.022	0.253	0.853	yes	no	no	no	no	no	None	IV	no	no	H	yes	4.11455	11.2533	2.73501	no
chr11	45954421	45955537	8.424	9.235	11.804	9.453	1.096	1.401	1.122	0.037	0.491	0.459	yes	no	no	no	no	no	None	I	no	no	F	no	0	0	0	no
chr11	46237447	46238384	6.561	7.309	8.118	6.944	1.114	1.237	1.058	0.349	0.058	0.046	no	no	yes	no	no	no	None	IX	no	no	F	no	0	0	0	no
chr11	46294149	46294860	2.081	5.399	4.297	1.515	2.594	2.064	0.728	0.014	0.068	0.185	yes	no	no	no	no	no	None	VIII	no	no	C	no	0	0	0	no
chr11	46382514	46385433	9.255	11.292	9.466	8.372	1.22	1.023	0.905	0.02	0.444	0.055	yes	no	no	no	no	yes	DGKZ	I	yes	no	F	no	0	0	0	no
chr11	46412681	46415287	6.833	10.712	9.626	5.576	1.568	1.409	0.816	0.173	0.122	0.025	no	no	yes	no	no	no	None	IX	no	no	I	yes	5.38089	4.73824	0.880568	no
chr11	46559372	46559694	2.291	3.217	5.001	3.181	1.404	2.183	1.388	0.341	0.02	0.222	no	yes	no	no	no	no	None	VIII	no	no	H	yes	2.93896	6.90762	2.35036	yes
chr11	46581932	46582570	4.676	4.201	5.112	2.459	0.899	1.093	0.526	0.087	0.02	0.205	no	yes	no	no	no	no	None	V	no	no	G	no	0	0	0	no
chr11	46679864	46680191	2.675	3.413	2.033	3.302	1.276	0.76	1.234	0.04	0.25	0.729	yes	no	no	no	no	no	None	VIII	no	no	F	no	0	0	0	no
chr11	47207052	47208370	3.011	7.21	4.827	3.774	2.395	1.603	1.254	0.022	0.633	0.619	yes	no	no	no	no	yes	PACSIN3	IV	no	no	C	no	0	0	0	no
chr11	47412022	47417881	8.761	13.555	12.086	7.677	1.547	1.38	0.876	0.124	0.015	0.015	no	yes	yes	no	no	no	None	VII	no	yes	I	no	0	0	0	no
chr11	47421375	47422716	2.497	5.471	4.401	4.746	2.191	1.763	1.901	0.006	0.218	0.434	yes	no	no	no	no	no	None	V	no	no	E	no	0	0	0	no
chr11	47475727	47476130	1.739	4.831	5.082	4.6	2.778	2.923	2.646	0.001	0.031	0.424	yes	yes	no	no	no	no	None	V	no	no	E	no	0	0	0	yes
chr11	47735939	47737304	4.511	8.303	7.196	4.923	1.84	1.595	1.091	0.201	0.028	0.838	no	yes	no	no	no	yes	AGBL2	II	no	yes	C	no	0	0	0	no
chr11	47745701	47746020	2.199	3.411	5.182	3.096	1.551	2.356	1.408	0.402	0.01	0.188	no	yes	no	no	no	no	None	VIII	no	no	E	no	0	0	0	no
chr11	47939260	47940328	4.253	5.072	7.059	5.735	1.193	1.66	1.349	0.366	0.134	0.037	no	no	yes	no	no	no	None	II	no	no	H	no	0	0	0	no
chr11	47959110	47959990	3.011	6.875	6.218	3.309	2.284	2.065	1.099	0.007	0.392	0.833	yes	no	no	no	no	no	None	IV	no	yes	C	no	0	0	0	no
chr11	47968502	47969197	4.897	6.275	7.012	4.558	1.281	1.432	0.931	0.19	0.037	0.329	no	yes	no	no	no	no	None	II	no	no	F	no	0	0	0	no
chr11	48053094	48054645	11.587	8.713	12.335	10.104	0.752	1.065	0.872	0.206	0.168	0.044	no	no	yes	no	no	no	None	I	no	no	G	no	0	0	0	no
chr11	48102576	48103333	3.838	5.376	7.553	3.304	1.401	1.968	0.861	0.189	0.026	0.206	no	yes	no	no	no	no	None	IV	no	no	I	no	0	0	0	no
chr11	57102183	57103590	8.856	13.093	8.066	8.049	1.478	0.911	0.909	0.1	0.005	0.282	no	yes	no	no	no	yes	SSRP1	VII	no	no	I	yes	3.43661	5.33052	1.5511	no
chr11	57243623	57244809	5.814	6.477	6.17	4.637	1.114	1.061	0.798	0.366	0.944	0.013	no	no	yes	no	no	no	None	II	no	no	F	yes	3.52675	6.92762	1.96431	no
chr11	57247812	57248128	6.008	8.271	8.328	5.875	1.377	1.386	0.978	0.046	0.519	0.621	yes	no	no	no	no	no	None	II	no	no	I	yes	3.6365	10.0688	2.76881	yes
chr11	57434200	57436611	7.243	8.888	7.217	5.776	1.227	0.996	0.797	0.285	0.807	0.045	no	no	yes	no	no	yes	ZDHHC5	IX	no	no	F	no	0	0	0	no
chr11	57555142	57556483	5.556	8.142	12.573	8.396	1.465	2.263	1.511	0.019	0.092	0.694	yes	no	no	no	no	no	None	I	no	no	E	no	0	0	0	no
chr11	58873802	58874748	3.011	5.651	4.777	2.862	1.877	1.587	0.951	0.004	0.187	0.633	yes	no	no	no	no	yes	FAM111B	IV	no	no	I	no	0	0	0	no
chr11	59317734	59319803	7.605	9.751	10.659	6.279	1.282	1.402	0.826	0.007	0.405	0.866	yes	no	no	no	no	no	None	IX	no	no	I	no	0	0	0	no
chr11	59323326	59324239	3.433	5.367	8.966	5.438	1.563	2.611	1.584	0.354	0.047	0.178	no	yes	no	no	no	no	None	II	no	no	E	no	0	0	0	no
chr11	59823769	59825660	6.526	8.221	11.588	9.751	1.26	1.776	1.494	0.191	0.143	0.039	no	no	yes	no	no	yes	MS4A3	I	no	no	H	no	0	0	0	no
chr11	59949764	59953154	4.125	5.369	4.714	4.663	1.302	1.143	1.131	0.017	0.923	0.776	yes	no	no	no	no	yes	MS4A6A	V	no	no	F	no	0	0	0	no
chr11	60686415	60687552	7.317	7.178	3.019	6.722	0.981	0.413	0.919	0.328	0.029	0.283	no	yes	no	yes	no	no	None	II	no	no	F	no	0	0	0	no
chr11	60737765	60738185	3.256	6.666	5.645	2.695	2.047	1.734	0.828	0.011	0.123	0.543	yes	no	no	yes	no	no	None	IV	no	no	C	no	0	0	0	yes
chr11	60809256	60810102	5.037	4.936	4.324	1.691	0.98	0.858	0.336	0.794	0.945	0.014	no	no	yes	yes	no	no	None	VIII	no	no	G	no	0	0	0	no
chr11	60843194	60843905	0.787	4.614	2.689	2.534	5.865	3.418	3.221	0.031	0.769	0.423	yes	no	no	yes	no	no	None	VIII	no	no	D	no	0	0	0	no
chr11	60859114	60860223	1.238	5.589	5.037	2.35	4.515	4.07	1.899	0.049	0.093	0.442	yes	no	no	no	no	no	None	IV	no	yes	D	no	0	0	0	no
chr11	61405933	61406218	4.663	9.046	8.894	3.666	1.94	1.908	0.786	0.021	0.292	0.312	yes	no	no	no	no	no	None	IX	no	no	C	yes	5.87792	5.9228	1.00764	yes
chr11	61455814	61456973	7.475	12.629	11.459	9.253	1.689	1.533	1.238	0.05	0.121	0.687	yes	no	no	no	no	no	None	I	no	no	I	no	0	0	0	no
chr11	61468842	61469485	3.98	5.467	6.925	4.909	1.374	1.74	1.233	0.03	0.029	0.481	yes	yes	no	no	no	no	None	V	no	no	H	yes	7.05618	4.05826	0.575136	no
chr11	61792925	61793504	3.404	4.908	5.721	3.361	1.442	1.681	0.987	0.062	0.04	0.47	no	yes	no	no	no	no	None	IV	no	no	H	no	0	0	0	no
chr11	61876417	61876839	5.235	6.515	6.844	6.533	1.245	1.307	1.248	0.008	0.038	0.213	yes	yes	no	no	no	no	None	II	no	no	F	no	0	0	0	no
chr11	62092236	62092709	4.487	5.149	4.42	1.334	1.147	0.985	0.297	0.59	0.539	0.017	no	no	yes	no	no	no	None	VIII	no	yes	G	yes	7.91519	5.33052	0.673454	yes
chr11	62198309	62198642	0.99	1.306	2.915	2.179	1.318	2.944	2.201	0.423	0.046	0.646	no	yes	no	no	no	no	None	VIII	no	no	E	no	0	0	0	no
chr11	62306018	62307285	5.757	10.446	6.483	2.005	1.814	1.126	0.348	0.214	0.413	0.01	no	no	yes	no	no	no	None	IV	no	no	I	no	0	0	0	no
chr11	62340700	62342551	3.543	4.331	5.283	6.229	1.223	1.491	1.758	0.268	0.024	0.009	no	yes	yes	no	no	yes	EEF1G	V	no	no	H	no	0	0	0	no
chr11	62360944	62361356	4.375	7.728	9.559	4.266	1.766	2.185	0.975	0.164	0.002	0.28	no	yes	no	no	no	no	None	II	no	no	C	yes	7.49719	8.62307	1.15017	yes
chr11	62446392	62446721	3.278	6.831	5.714	4.078	2.084	1.743	1.244	0.013	0.047	0.742	yes	yes	no	no	no	yes	UBXN1	IV	no	no	C	no	0	0	0	no
chr11	62572123	62574945	8.565	10.193	8.345	8.6	1.19	0.974	1.004	0.036	0.068	0.144	yes	no	no	no	no	yes	NXF1	I	no	no	F	no	0	0	0	no
chr11	62606417	62607458	10.665	15.16	15.57	11.163	1.421	1.46	1.047	0.095	0.038	0.554	no	yes	no	no	no	yes	WDR74	VI	no	yes	I	no	0	0	0	no
chr11	62673439	62673813	6.414	10.737	12.121	8.791	1.674	1.89	1.371	0.063	0.011	0.197	no	yes	no	no	no	no	None	I	no	no	H	yes	8.2395	6.79594	0.8248	yes
chr11	63011007	63011434	2.819	3.933	4.585	2.17	1.395	1.627	0.77	0.004	0.025	0.205	yes	yes	no	no	no	no	None	VIII	no	no	I	no	0	0	0	no
chr11	63272841	63274125	4.825	6.471	7.327	6.998	1.341	1.519	1.45	0.001	0.143	0.172	yes	no	no	no	no	yes	LGALS12	II	no	no	H	no	0	0	0	no
chr11	63580385	63581927	9.785	17.773	11.875	7.451	1.816	1.214	0.761	0.191	0.008	0.26	no	yes	no	yes	no	yes	C11orf84	VII	no	no	I	no	0	0	0	no
chr11	63639378	63640338	6.185	8.42	8.314	6.268	1.361	1.344	1.013	0.029	0.072	0.094	yes	no	no	yes	no	no	None	IX	no	no	F	no	0	0	0	no
chr11	63794841	63796252	6.871	9.221	8.672	7.891	1.342	1.262	1.148	0.086	0.023	0.9	no	yes	no	yes	no	no	None	IX	no	no	F	no	0	0	0	no
chr11	63802957	63804481	4.763	8.495	3.753	2.771	1.784	0.788	0.582	0.032	0.201	0.202	yes	no	no	yes	no	no	None	IV	no	no	I	no	0	0	0	no
chr11	63827990	63828532	4.956	11.11	9.95	5.422	2.242	2.008	1.094	0.045	0.125	0.958	yes	no	no	yes	no	no	None	IX	no	no	C	no	0	0	0	no
chr11	63860769	63861378	3.9	1.261	4.107	1.062	0.323	1.053	0.272	0.319	0.066	0.003	no	no	yes	yes	no	no	None	VIII	no	no	G	no	0	0	0	no
chr11	63913609	63913915	5.418	4.667	7.225	1.696	0.861	1.334	0.313	0.775	0.854	0	no	no	yes	yes	no	no	None	IV	no	yes	F	yes	2.82883	8.29192	2.93122	yes
chr11	63952013	63954932	2.749	5.427	5.353	4.116	1.974	1.948	1.497	0.027	0.102	0.755	yes	no	no	yes	no	yes	STIP1	V	yes	no	C	no	0	0	0	no
chr11	64038757	64039260	5.504	8.687	9.429	5.251	1.578	1.713	0.954	0.028	0.096	0.632	yes	no	no	no	yes	no	None	IX	no	no	I	no	0	0	0	no
chr11	64051821	64053599	10.174	20.726	19.766	11.477	2.037	1.943	1.128	0.14	0.014	0.988	no	yes	no	no	yes	yes	GPR137	VI	no	no	C	no	0	0	0	no
chr11	64067716	64068868	6.983	12.852	8.062	9.031	1.84	1.155	1.293	0.139	0.017	0.857	no	yes	no	no	yes	yes	TEX40	IX	no	no	I	yes	4.48079	6.17894	1.37898	no
chr11	64084371	64087338	6.973	7.577	8.877	6.63	1.087	1.273	0.951	0.292	0.049	0.269	no	yes	no	no	yes	yes	TRMT112	IX	yes	no	F	no	0	0	0	no
chr11	64106801	64109010	5.807	10.563	9.161	5.187	1.819	1.578	0.893	0.115	0.001	0.204	no	yes	no	no	yes	yes	CCDC88B	IX	no	no	I	no	0	0	0	no
chr11	64158097	64159625	3.39	5.053	6.784	4.22	1.491	2.001	1.245	0.265	0.033	0.373	no	yes	no	no	yes	no	None	IV	no	no	H	no	0	0	0	no
chr11	64305482	64306293	5.207	8.972	10.645	7.746	1.723	2.044	1.488	0.121	0.047	0.094	no	yes	no	no	yes	no	None	IX	no	no	C	no	0	0	0	no
chr11	64418267	64418723	7.19	5.112	6.285	4.318	0.711	0.874	0.601	0.008	0.479	0.055	yes	no	no	no	yes	no	None	V	no	yes	G	yes	5.87792	8.29192	1.41069	no
chr11	64570280	64572113	8.963	11.642	9.668	9.006	1.299	1.079	1.005	0.049	0.688	0.154	yes	no	no	no	yes	yes	MAP4K2	I	no	no	F	yes	8.37921	4.44428	0.530394	no
chr11	64644854	64647480	9.001	14.715	11.493	9.004	1.635	1.277	1	0.177	0.013	0.461	no	yes	no	no	no	yes	EHD1	VII	no	no	I	yes	7.6413	8.3857	1.09742	no
chr11	64794601	64795452	9.21	18.847	19.813	11.759	2.046	2.151	1.277	0.154	0.031	0.135	no	yes	no	no	no	yes	SNX15	VI	no	no	C	no	0	0	0	no
chr11	64863285	64864496	4.326	8.213	7.587	6.43	1.899	1.754	1.487	0.115	0.011	0.136	no	yes	no	no	no	yes	VPS51	II	yes	no	C	no	0	0	0	no
chr11	64877760	64878409	6.448	9.144	10.018	6.643	1.418	1.554	1.03	0.136	0.014	0.514	no	yes	no	no	no	no	None	IX	no	no	I	yes	10.8826	5.73759	0.527227	yes
chr11	64948202	64951195	4.859	6.583	6.034	4.497	1.355	1.242	0.926	0.023	0.143	0.36	yes	no	no	no	no	yes	CAPN1	IV	no	no	F	no	0	0	0	no
chr11	65197480	65197855	2.741	5.733	5.679	3.206	2.091	2.072	1.17	0.039	0.156	0.456	yes	no	no	no	no	no	None	IV	no	no	C	no	0	0	0	no
chr11	65209267	65209997	2.344	4.017	5.581	3.105	1.714	2.381	1.325	0.184	0.011	0.738	no	yes	no	no	no	no	None	V	no	no	E	no	0	0	0	no
chr11	65307498	65308993	7.042	17.888	11.727	6.829	2.54	1.665	0.97	0.09	0.001	0.844	no	yes	no	no	no	no	None	VII	no	no	C	yes	6.46571	4.25841	0.658614	no
chr11	65336618	65338180	7.561	10.148	7.576	8.986	1.342	1.002	1.188	0.229	0.1	0.028	no	no	yes	no	no	yes	LOC254100	I	no	no	F	no	0	0	0	no
chr11	65639341	65641453	8.385	10.74	9.22	5.438	1.281	1.1	0.649	0.254	0.642	0.027	no	no	yes	no	no	yes	EFEMP2	IX	no	no	F	no	0	0	0	no
chr11	65657578	65659692	6.084	8.323	8.381	5.206	1.368	1.378	0.856	0.207	0.012	0.176	no	yes	no	no	no	yes	CCDC85B	IX	no	no	I	no	0	0	0	no
chr11	65695110	65696514	8.463	7.321	13.657	7.968	0.865	1.614	0.942	0.737	0.033	0.155	no	yes	no	no	no	no	None	I	no	no	F	no	0	0	0	no
chr11	65848938	65849288	4.56	7.453	11.167	5	1.635	2.449	1.097	0.173	0.006	0.191	no	yes	no	no	no	no	None	II	no	no	C	no	0	0	0	no
chr11	66156378	66156829	2.271	4.602	3.002	2.125	2.026	1.322	0.936	0.003	0.54	0.242	yes	no	no	no	no	no	None	VIII	no	no	I	yes	8.37921	7.10736	0.848214	no
chr11	66200116	66200621	4.211	6.677	6.673	5.095	1.586	1.585	1.21	0.148	0.034	0.875	no	yes	no	no	no	no	None	II	no	no	H	no	0	0	0	no
chr11	66235281	66235640	7.999	8.683	10.112	6.329	1.086	1.264	0.791	0.258	0.033	0.065	no	yes	no	no	no	no	None	IX	no	no	F	no	0	0	0	no
chr11	66309770	66310316	2.766	5.095	5.688	2.281	1.842	2.056	0.825	0.045	0.182	0.231	yes	no	no	no	no	no	None	IV	no	no	C	no	0	0	0	no
chr11	66335963	66336247	3.366	8.671	6.894	4.446	2.576	2.048	1.321	0.027	0.075	0.979	yes	no	no	no	no	yes	CTSF	IV	no	no	C	no	0	0	0	no
chr11	66362771	66363248	7.424	8.525	10.741	7.56	1.148	1.447	1.018	0.023	0.025	0.471	yes	yes	no	no	no	no	None	IX	no	no	F	no	0	0	0	no
chr11	66462208	66462576	9.756	10.657	9.011	7.079	1.092	0.924	0.726	0.039	0.704	0.02	yes	no	yes	no	no	no	None	IX	no	no	F	yes	3.52675	10.0369	2.84594	yes
chr11	66650669	66650967	6.371	7.623	9.355	4.861	1.196	1.468	0.763	0.178	0.137	0.012	no	no	yes	no	no	no	None	IX	no	no	I	no	0	0	0	yes
chr11	66725146	66726722	7.445	13.685	9.775	6.982	1.838	1.313	0.938	0.201	0.043	0.224	no	yes	no	no	no	yes	PC	IX	no	no	I	no	0	0	0	no
chr11	67007170	67008904	4.043	5.632	6.328	4.763	1.393	1.565	1.178	0.098	0.031	0.311	no	yes	no	no	no	yes	KDM2A	IV	no	no	H	no	0	0	0	no
chr11	67033481	67040706	5.316	6.549	6.383	5.092	1.232	1.201	0.958	0.16	0.024	0.821	no	yes	no	no	no	yes	ADRBK1	II	yes	no	F	yes	4.09689	4.96486	1.21186	no
chr11	67053912	67058725	6.401	9.102	8.324	8.346	1.422	1.3	1.304	0.039	0.245	0.257	yes	no	no	no	no	yes	ANKRD13D	IX	yes	no	H	yes	5.72768	6.29708	1.09941	no
chr11	67138687	67141958	4.373	4.609	4.404	3.867	1.054	1.007	0.884	0.975	0.221	0.013	no	no	yes	no	no	yes	CLCF1	V	no	no	F	yes	5.27679	3.08947	0.585483	no
chr11	67148267	67149399	7.527	6.22	7.212	7.206	0.826	0.958	0.957	0.014	0.026	0.477	yes	yes	no	no	no	no	None	II	no	no	F	no	0	0	0	no
chr11	67185884	67186853	3.764	6.286	4.737	1.153	1.67	1.259	0.306	0.015	0.119	0.003	yes	no	yes	no	no	no	None	IV	no	no	I	no	0	0	0	no
chr11	67268372	67268818	4.203	5.132	6.569	5.07	1.221	1.563	1.206	0.869	0.009	0.135	no	yes	no	no	no	no	None	V	no	no	H	no	0	0	0	no
chr11	67396646	67398646	6.876	10.706	11.705	6.498	1.557	1.702	0.945	0.028	0.062	0.313	yes	no	no	no	no	yes	NUDT8	IX	no	no	I	yes	3.79144	11.2533	2.96809	no
chr11	67416211	67417070	3.28	5.144	6.212	2.803	1.568	1.894	0.855	0.017	0.214	0.303	yes	no	no	no	no	no	None	IV	no	no	I	no	0	0	0	no
chr11	67417919	67418442	4.076	8.376	6.683	5.647	2.055	1.639	1.385	0.009	0.166	0.643	yes	no	no	no	no	yes	ACY3	II	no	no	C	no	0	0	0	no
chr11	67885242	67885666	4.549	6.849	4.265	3.975	1.506	0.938	0.874	0.036	0.961	0.666	yes	no	no	no	no	no	None	IV	no	no	I	no	0	0	0	no
chr11	68024852	68025881	4.064	7.812	6.541	3.233	1.922	1.61	0.796	0.095	0.04	0.203	no	yes	no	no	no	no	None	IV	no	no	I	yes	3.52675	5.51983	1.56513	no
chr11	68070248	68071025	5.757	5.441	6.583	7.354	0.945	1.143	1.277	0.833	0.514	0.048	no	no	yes	no	no	no	None	II	no	no	F	no	0	0	0	no
chr11	68204578	68205501	9.188	8.633	9.984	8.068	0.94	1.087	0.878	0.113	0.078	0.035	no	no	yes	no	no	no	None	IX	no	no	F	no	0	0	0	no
chr11	68610418	68611843	5.438	7.173	6.015	4.176	1.319	1.106	0.768	0.334	0.002	0.006	no	yes	yes	no	no	no	None	IV	no	no	F	no	0	0	0	no
chr11	68816021	68817507	9.384	11.067	12.027	7.216	1.179	1.282	0.769	0.24	0.04	0.117	no	yes	no	no	no	yes	TPCN2	I	no	no	F	no	0	0	0	no
chr11	68856195	68857127	2.849	5.851	6.079	2.846	2.054	2.134	0.999	0.011	0.388	0.279	yes	no	no	no	no	no	None	IV	no	no	C	yes	3.08708	4.985	1.61479	no
chr11	69208946	69210298	4.558	5.652	7.51	5.918	1.24	1.648	1.298	0.485	0.031	0.934	no	yes	no	no	no	no	None	II	no	no	H	no	0	0	0	no
chr11	69703357	69703676	3.28	7.06	4.658	1.264	2.153	1.42	0.385	0.016	0.266	0.564	yes	no	no	no	no	no	None	IV	no	no	I	yes	2.41273	4.13987	1.71584	yes
chr11	70041982	70042555	3.916	4.363	4.114	1.677	1.114	1.051	0.428	0.735	0.301	0.008	no	no	yes	no	no	no	None	VIII	no	no	F	yes	4.70234	4.24746	0.903265	yes
chr11	70261230	70263501	6.659	5.443	6.593	6.952	0.817	0.99	1.044	0.039	0.18	0.526	yes	no	no	no	no	no	None	II	no	no	F	no	0	0	0	no
chr11	71736175	71736532	2.358	6.216	4.67	3.26	2.636	1.981	1.383	0.009	0.194	0.339	yes	no	no	no	no	no	None	IV	no	no	C	no	0	0	0	no
chr11	71813164	71815154	3.921	6.798	5.277	4.925	1.734	1.346	1.256	0.096	0.02	0.372	no	yes	no	no	no	yes	LAMTOR1	IV	no	no	I	no	0	0	0	no
chr11	71950532	71951528	3.28	6.026	5.809	3.17	1.837	1.771	0.967	0.015	0.303	0.52	yes	no	no	no	no	no	None	IV	no	no	C	no	0	0	0	no
chr11	72044654	72045188	6.813	6.897	8.066	4.156	1.012	1.184	0.61	0.593	0.475	0.032	no	no	yes	no	no	no	None	II	no	no	F	no	0	0	0	no
chr11	72125187	72125738	2.268	5.479	4.718	2.455	2.416	2.08	1.082	0.068	0.042	0.714	no	yes	no	no	no	no	None	VIII	no	no	C	yes	3.52675	7.503	2.12745	yes
chr11	72295274	72297033	4.095	7.006	5.323	3.022	1.711	1.3	0.738	0.135	0.027	0.13	no	yes	no	no	no	no	None	IV	no	no	I	yes	3.52809	4.90035	1.38895	no
chr11	72346584	72346928	2.343	4.473	2.68	5.266	1.909	1.144	2.247	0.647	0.189	0.039	no	no	yes	no	no	no	None	V	no	no	E	no	0	0	0	no
chr11	72395494	72396042	2.876	5.705	3.461	2.499	1.984	1.203	0.869	0.01	0.206	0.987	yes	no	no	no	no	no	None	VIII	no	no	I	yes	7.6902	4.14596	0.539123	no
chr11	72431087	72431528	5.222	7.126	9.534	6.044	1.365	1.826	1.158	0.097	0.01	0.923	no	yes	no	no	no	no	None	II	no	no	H	no	0	0	0	no
chr11	72504597	72505802	8.98	16.639	17.484	10.304	1.853	1.947	1.147	0.203	0.031	0.47	no	yes	no	no	no	yes	STARD10	VI	no	no	C	yes	10.5803	8.66956	0.819409	no
chr11	72542545	72543645	4.525	7.289	6.996	5.179	1.611	1.546	1.145	0.011	0.388	0.592	yes	no	no	no	no	no	None	II	no	no	I	yes	3.19131	13.0302	4.08301	no
chr11	72851515	72855101	6.351	10.355	9.295	5.477	1.631	1.464	0.862	0.21	0.486	0.021	no	no	yes	no	no	yes	FCHSD2	IX	no	no	I	no	0	0	0	no
chr11	72947793	72948326	3.452	6.281	7.389	3.373	1.819	2.14	0.977	0.112	0.031	0.588	no	yes	no	no	no	no	None	IV	yes	yes	C	yes	4.44909	10.661	2.39623	yes
chr11	72980654	72981643	5.414	5.013	5.646	1.696	0.926	1.043	0.313	0.538	0.961	0.034	no	no	yes	no	no	yes	P2RY6	IV	no	no	G	no	0	0	0	no
chr11	72985345	72986568	3.968	5.538	7.159	5.577	1.396	1.804	1.406	0.503	0.035	0.657	no	yes	no	no	no	no	None	II	no	no	H	no	0	0	0	no
chr11	73046574	73046857	5.762	7.795	8.309	5.354	1.353	1.442	0.929	0.014	0.324	0.415	yes	no	no	no	no	no	None	II	no	no	I	no	0	0	0	no
chr11	73135694	73137671	6	4.273	4.188	5.082	0.712	0.698	0.847	0.002	0.722	0	yes	no	yes	no	no	no	None	V	no	no	G	no	0	0	0	no
chr11	73461216	73461620	2.79	4.672	7.116	3.133	1.675	2.55	1.123	0.524	0.015	0.863	no	yes	no	no	no	no	None	IV	no	no	C	no	0	0	0	no
chr11	73692942	73696016	8.166	20.666	11.242	12.097	2.531	1.377	1.481	0.144	0.722	0	no	no	yes	no	no	yes	UCP2	VII	no	no	C	no	0	0	0	no
chr11	73734353	73734718	4.69	5.688	6.551	4.718	1.213	1.397	1.006	0.951	0.047	0.463	no	yes	no	no	no	no	None	IV	no	no	F	no	0	0	0	no
chr11	74171831	74172226	6.226	4.526	9.589	6.698	0.727	1.54	1.076	0.109	0.044	0.771	no	yes	no	no	no	no	None	IX	no	no	F	no	0	0	0	no
chr11	74173006	74174040	6.779	9.886	9.893	6.783	1.458	1.459	1.001	0.032	0.02	0.251	yes	yes	no	no	no	no	None	IX	no	no	I	no	0	0	0	no
chr11	74413486	74413784	5.444	6.59	8.114	4.359	1.211	1.49	0.801	0.651	0.04	0.135	no	yes	no	no	no	no	None	II	no	no	I	yes	6.85983	10.2467	1.49372	no
chr11	74851635	74851943	4.796	5.993	5.332	1.077	1.249	1.112	0.225	0.38	0.873	0.021	no	no	yes	no	no	no	None	IV	no	no	F	yes	5.73315	5.29623	0.923791	yes
chr11	74916017	74916426	6.199	7.359	11.596	4.007	1.187	1.871	0.646	0.607	0.012	0.137	no	yes	no	no	no	no	None	IX	no	no	H	yes	4.06157	5.51983	1.35904	yes
chr11	74925443	74925798	7.31	10.434	10.627	6.743	1.427	1.454	0.922	0.197	0.021	0.298	no	yes	no	no	no	no	None	IX	no	no	I	yes	11.3268	5.32301	0.469947	no
chr11	74944794	74945065	5.682	6.789	7.634	5.05	1.195	1.344	0.889	0.029	0.126	0.273	yes	no	no	no	no	no	None	II	no	no	F	no	0	0	0	no
chr11	75047617	75048761	4.122	6.323	5.204	5.338	1.534	1.262	1.295	0.014	0.597	0.333	yes	no	no	no	no	no	None	V	no	no	H	no	0	0	0	no
chr11	75094354	75094700	4.143	8.834	7.7	1.86	2.132	1.859	0.449	0.044	0.572	0.219	yes	no	no	no	no	no	None	IV	no	no	C	no	0	0	0	no
chr11	75258638	75258941	2.762	4.349	5.457	1.592	1.574	1.976	0.576	0.089	0.045	0.007	no	yes	yes	no	no	no	None	VIII	no	no	I	yes	6.5916	3.08947	0.468698	yes
chr11	75287495	75288371	6.097	7.471	13.167	10.655	1.225	2.16	1.748	0.154	0.021	0.017	no	yes	yes	no	no	no	None	I	no	no	E	no	0	0	0	no
chr11	75434226	75434619	6.226	9.688	9.714	4.834	1.556	1.56	0.776	0.166	0.028	0.165	no	yes	no	no	no	no	None	IX	no	no	I	yes	10.4367	5.9228	0.567497	yes
chr11	75484297	75485103	3.597	5.037	4.941	3.98	1.4	1.374	1.106	0.017	0.142	0.304	yes	no	no	no	no	no	None	V	no	no	I	no	0	0	0	no
chr11	75525474	75527035	2.569	5.402	4.56	3.742	2.103	1.775	1.457	0.009	0.165	0.713	yes	no	no	no	no	yes	UVRAG	V	no	no	C	no	0	0	0	no
chr11	75527323	75528238	4.091	2.901	4.43	3.275	0.709	1.083	0.801	0.284	0.043	0.126	no	yes	no	no	no	no	None	VIII	no	no	G	no	0	0	0	no
chr11	75916947	75922603	5.243	9.198	8.393	4.869	1.754	1.601	0.929	0.208	0.019	0.265	no	yes	no	no	no	yes	WNT11	IX	no	no	I	yes	3.04618	17.1761	5.63858	no
chr11	76029856	76030155	1.219	6.393	8.08	5.121	5.245	6.629	4.201	0.039	0.026	0.138	yes	yes	no	no	no	no	None	II	no	no	A	yes	5.15491	9.58142	1.8587	yes
chr11	76337402	76338738	12.352	14.211	19.947	12.429	1.151	1.615	1.006	0.22	0.022	0.328	no	yes	no	no	no	no	None	VI	no	no	F	no	0	0	0	no
chr11	76381262	76382492	2.691	5.754	4.91	2.76	2.138	1.824	1.026	0.026	0.1	0.464	yes	no	no	no	no	yes	LRRC32	IV	no	no	C	no	0	0	0	no
chr11	76432739	76433155	6.36	9.285	9.299	6.315	1.46	1.462	0.993	0.173	0.017	0.124	no	yes	no	no	no	yes	GUCY2EP	IX	no	no	I	yes	5.29013	7.24477	1.36949	no
chr11	76493707	76495527	7.656	8.832	6.566	7.185	1.154	0.858	0.938	0.195	0.007	0.062	no	yes	no	no	no	yes	TSKU	IX	no	no	F	no	0	0	0	no
chr11	76534765	76535629	3.661	2.373	5.164	3.402	0.648	1.411	0.929	0.008	0.282	0.682	yes	no	no	no	no	no	None	V	no	no	F	no	0	0	0	no
chr11	77967985	77968335	3.041	6.357	5.467	4.017	2.09	1.798	1.321	0.009	0.184	0.192	yes	no	no	yes	no	no	None	IV	no	no	C	no	0	0	0	no
chr11	78029476	78030032	3.569	1.682	2.391	1.24	0.471	0.67	0.347	0.47	0.053	0.016	no	no	yes	yes	no	no	None	VIII	no	no	G	no	0	0	0	no
chr11	78101849	78102242	3.832	4.928	6.159	4.989	1.286	1.608	1.302	0.75	0.005	0.625	no	yes	no	yes	no	no	None	V	no	no	H	no	0	0	0	no
chr11	78438837	78439810	6.085	7.592	9.921	8.746	1.248	1.63	1.437	0.018	0.17	0.095	yes	no	no	no	no	no	None	IX	no	no	H	no	0	0	0	no
chr11	79104317	79105173	3.39	6.098	3.934	3.235	1.799	1.16	0.954	0.03	0.412	0.311	yes	no	no	no	no	no	None	IV	no	no	I	no	0	0	0	no
chr11	79275665	79277278	3.157	3.516	4.447	5.414	1.114	1.409	1.715	0.29	0.09	0.046	no	no	yes	no	no	no	None	V	no	yes	H	no	0	0	0	no
chr11	79281179	79281533	3.663	1.354	2.322	2.707	0.37	0.634	0.739	0.028	0.415	0.228	yes	no	no	no	no	no	None	VIII	no	no	G	no	0	0	0	no
chr11	80031850	80032177	1	2.92	4.422	2.106	2.92	4.422	2.106	0.383	0.042	0.423	no	yes	no	yes	no	no	None	VIII	no	no	D	no	0	0	0	yes
chr11	82594699	82595274	4.479	3.03	3.123	1.696	0.676	0.697	0.379	0.147	0.897	0.006	no	no	yes	no	no	no	None	VIII	no	no	G	no	0	0	0	no
chr11	85492713	85493051	5.917	7.557	8.937	5.35	1.277	1.51	0.904	0.161	0.011	0.171	no	yes	no	no	no	no	None	II	no	no	I	no	0	0	0	no
chr11	85862354	85863041	3.507	2.072	4.484	2.999	0.591	1.279	0.855	0.114	0.001	0.609	no	yes	no	no	no	no	None	VIII	no	no	F	no	0	0	0	no
chr11	86415022	86415362	5.597	5.151	7.205	6.509	0.92	1.287	1.163	0.437	0.035	0.834	no	yes	no	no	no	no	None	II	no	no	F	no	0	0	0	no
chr11	86510835	86512025	5.236	6.158	6.718	3.547	1.176	1.283	0.677	0.177	0.003	0.067	no	yes	no	no	no	yes	PRSS23	IV	no	no	F	no	0	0	0	no
chr11	86787335	86788493	4.872	4.709	6.069	5.456	0.966	1.246	1.12	0.99	0.044	0.027	no	yes	yes	no	no	no	None	V	no	no	F	no	0	0	0	no
chr11	87063831	87064281	4.985	9.026	8.16	5.899	1.811	1.637	1.183	0.019	0.131	0.794	yes	no	no	no	no	no	None	II	no	no	H	no	0	0	0	yes
chr11	92822630	92823022	3.253	0.683	1.665	1.414	0.21	0.512	0.435	0	0.107	0.004	yes	no	yes	yes	no	no	None	VIII	no	no	G	yes	3.9691	4.44428	1.11972	yes
chr11	93270278	93272792	7.104	8.753	10.147	7.149	1.232	1.428	1.006	0.949	0.014	0.135	no	yes	no	no	no	no	None	IX	no	no	F	no	0	0	0	no
chr11	93867963	93868670	6.56	8.738	9.254	7.789	1.332	1.411	1.187	0.021	0.196	0.809	yes	no	no	no	no	no	None	IX	no	no	H	no	0	0	0	no
chr11	93904881	93905286	2.987	4.512	4.839	2.974	1.511	1.62	0.996	0.432	0.016	0.185	no	yes	no	no	no	no	None	V	no	no	I	no	0	0	0	yes
chr11	94309558	94310127	4.193	2.211	4.887	2.138	0.527	1.166	0.51	0.156	0.066	0.046	no	no	yes	no	no	no	None	VIII	no	no	G	no	0	0	0	no
chr11	94316712	94317699	4.493	2.813	4.432	3.822	0.626	0.986	0.851	0.102	0.409	0.023	no	no	yes	no	no	no	None	V	no	no	G	no	0	0	0	no
chr11	94370836	94373573	8.412	9.928	11.533	9.191	1.18	1.371	1.093	0.08	0.031	0.654	no	yes	no	no	no	no	None	I	no	no	F	no	0	0	0	no
chr11	94681400	94682321	5.374	3.914	5.461	4.684	0.728	1.016	0.872	0.023	0.534	0.493	yes	no	no	no	no	no	None	V	no	no	G	no	0	0	0	no
chr11	94866082	94866446	3.022	2.942	5.401	4.506	0.974	1.788	1.491	0.682	0.049	0.477	no	yes	no	no	no	no	None	V	no	no	H	no	0	0	0	no
chr11	94883313	94884960	6.039	8.482	9.686	5.57	1.405	1.604	0.922	0.091	0.044	0.473	no	yes	no	no	no	no	None	IX	no	no	I	yes	4.66181	12.7394	2.73272	no
chr11	95070306	95071095	4.44	6.478	6.822	5.634	1.459	1.536	1.269	0.018	0.307	0.019	yes	no	yes	no	no	no	None	II	no	no	H	no	0	0	0	no
chr11	95438718	95439001	2.597	3.318	6.217	3.095	1.278	2.394	1.192	0.253	0.028	0.385	no	yes	no	no	no	no	None	VIII	no	no	H	no	0	0	0	yes
chr11	95906344	95907186	5.011	4.509	5.262	5.095	0.9	1.05	1.017	0.042	0.011	0.648	yes	yes	no	no	no	no	None	V	no	no	F	no	0	0	0	no
chr11	95976248	95976799	5.341	8.117	7.029	5.249	1.52	1.316	0.983	0.024	0.303	0.237	yes	no	no	no	no	no	None	II	no	no	I	no	0	0	0	no
chr11	96197036	96197335	2.666	5.459	4.552	3.134	2.047	1.707	1.176	0.014	0.994	0.56	yes	no	no	no	no	no	None	IV	no	no	C	yes	3.75284	8.69628	2.31725	yes
chr11	100612155	100612969	5.707	3.62	5.212	5.594	0.634	0.913	0.98	0.13	0.686	0.032	no	no	yes	no	no	no	None	V	no	no	G	no	0	0	0	no
chr11	102174230	102174547	5.584	3.551	5.139	1.968	0.636	0.92	0.352	0.248	0.521	0.036	no	no	yes	no	no	no	None	VIII	no	yes	G	no	0	0	0	no
chr11	102483695	102484149	2.427	6.119	5.165	3.752	2.521	2.128	1.546	0.02	0.238	0.209	yes	no	no	no	no	no	None	IV	no	yes	C	no	0	0	0	no
chr11	102582898	102583250	4.541	1.354	4.698	3.264	0.298	1.035	0.719	0.001	0.232	0.235	yes	no	no	no	no	no	None	V	no	no	G	no	0	0	0	no
chr11	102790674	102791473	2.789	2.112	2.456	5.25	0.757	0.881	1.883	0.536	0.508	0.045	no	no	yes	no	no	no	None	VIII	no	no	G	no	0	0	0	no
chr11	104402466	104403018	5.247	1.261	2.955	4.491	0.24	0.563	0.856	0.004	0.18	0.091	yes	no	no	yes	no	no	None	V	no	no	G	no	0	0	0	no
chr11	105892582	105893430	4.394	6.756	5.296	4.25	1.537	1.205	0.967	0.197	0.015	0.087	no	yes	no	no	no	yes	MSANTD4	IV	no	no	I	no	0	0	0	no
chr11	106889667	106890258	6.944	8.655	7.211	4.032	1.246	1.038	0.581	0.138	0.312	0.043	no	no	yes	no	no	no	None	IX	no	no	F	no	0	0	0	no
chr11	107461523	107463021	4.311	7.438	5.303	3.083	1.725	1.23	0.715	0.217	0.652	0.035	no	no	yes	no	no	yes	ELMOD1	IV	no	yes	I	no	0	0	0	no
chr11	107991760	107992844	10.381	16.323	17.559	7.036	1.572	1.691	0.678	0.317	0.005	0.001	no	yes	yes	no	no	yes	ACAT1	VI	no	no	I	no	0	0	0	no
chr11	108031685	108031999	4.398	2.689	2.362	1.141	0.611	0.537	0.26	0.34	0.056	0.012	no	no	yes	no	no	no	None	VIII	no	no	G	no	0	0	0	no
chr11	108463641	108464720	6.55	7.645	8.886	6.451	1.167	1.357	0.985	0.061	0.563	0.006	no	no	yes	no	no	yes	EXPH5	IX	no	no	F	no	0	0	0	no
chr11	109618454	109618910	6.419	7.854	9.276	7.403	1.224	1.445	1.153	0.773	0.021	0.618	no	yes	no	no	no	no	None	IX	no	no	H	no	0	0	0	no
chr11	110361492	110362011	4.763	6.809	9.681	3.673	1.43	2.032	0.771	0.404	0.042	0.202	no	yes	no	no	no	no	None	II	no	no	I	no	0	0	0	no
chr11	110648469	110649447	4.839	4.968	5.168	2.86	1.027	1.068	0.591	0.759	0.019	0.012	no	yes	yes	no	no	no	None	V	no	no	F	no	0	0	0	no
chr11	110839099	110839479	5.913	3.397	5.894	5.976	0.574	0.997	1.011	0.268	0.042	0.346	no	yes	no	no	no	no	None	V	no	no	G	no	0	0	0	no
chr11	110890067	110891165	1.055	1.407	4.334	2.34	1.333	4.109	2.219	0.423	0.043	0.4	no	yes	no	no	no	no	None	VIII	no	no	B	no	0	0	0	no
chr11	111382792	111383999	2.401	4.651	4.192	1.097	1.937	1.746	0.457	0.003	0.523	0.187	yes	no	no	no	no	yes	BTG4	VIII	no	yes	C	yes	4.85112	4.41353	0.909796	no
chr11	111402360	111403406	2.81	4.201	5.015	1.299	1.495	1.785	0.462	0.201	0.033	0.204	no	yes	no	no	no	no	None	VIII	no	no	I	no	0	0	0	no
chr11	111749161	111750910	6.031	9.683	8.015	6.145	1.605	1.329	1.019	0.044	0.899	0.269	yes	no	no	no	no	yes	FDXACB1	IX	no	no	I	yes	3.52675	10.0688	2.85497	no
chr11	111944627	111945773	4.051	8.412	6.71	4.226	2.076	1.656	1.043	0.131	0.001	0.465	no	yes	no	no	no	yes	PIH1D2	IV	no	no	C	no	0	0	0	no
chr11	112165457	112165966	4.016	1.894	2.648	2.482	0.472	0.659	0.618	0.003	0.879	0.273	yes	no	no	no	no	no	None	VIII	no	no	G	no	0	0	0	no
chr11	113074946	113075419	6.08	8.874	7.771	7.222	1.46	1.278	1.188	0.048	0.343	0.533	yes	no	no	no	no	no	None	IX	no	no	I	no	0	0	0	no
chr11	115636325	115638290	3.206	5.221	5.249	4.421	1.629	1.637	1.379	0.494	0.015	0.73	no	yes	no	no	no	no	None	V	no	no	H	no	0	0	0	no
chr11	115845845	115846674	2.912	5.138	5.26	1.243	1.764	1.806	0.427	0.049	0.36	0.195	yes	no	no	no	no	no	None	VIII	no	no	I	no	0	0	0	no
chr11	115914475	115914982	4.524	5.203	8.434	9.378	1.15	1.864	2.073	0.032	0.15	0.099	yes	no	no	no	no	no	None	II	no	yes	H	no	0	0	0	no
chr11	116183083	116184247	5.293	9.697	7.822	5.883	1.832	1.478	1.112	0.157	0.004	0.345	no	yes	no	no	no	no	None	II	no	no	I	no	0	0	0	no
chr11	116684636	116685707	3.528	2.852	2.544	2.25	0.808	0.721	0.638	0.04	0.556	0.119	yes	no	no	no	no	no	None	VIII	no	no	G	no	0	0	0	no
chr11	117693961	117696243	4.167	6.652	5.285	4.713	1.596	1.268	1.131	0.022	0.576	0.151	yes	no	no	no	no	yes	FXYD2	V	no	no	I	no	0	0	0	no
chr11	117877713	117879666	4.477	4.51	5.93	5.421	1.007	1.325	1.211	0.567	0.004	0.152	no	yes	no	no	no	no	None	V	no	no	F	no	0	0	0	no
chr11	118185978	118187894	11.28	13.26	14.431	10.475	1.176	1.279	0.929	0.349	0.076	0.026	no	no	yes	no	no	no	None	VI	no	no	F	no	0	0	0	no
chr11	118189391	118190631	8.319	10.329	10.687	10.212	1.242	1.285	1.227	0.177	0.698	0.032	no	no	yes	no	no	no	None	I	no	yes	F	no	0	0	0	no
chr11	118271365	118272728	3.413	5.799	4.67	3.37	1.699	1.368	0.988	0.076	0.027	0.455	no	yes	no	no	no	yes	ATP5L	IV	no	no	I	no	0	0	0	no
chr11	118475653	118476578	3.955	4.939	5.837	5.77	1.249	1.476	1.459	0.323	0.023	0.313	no	yes	no	no	no	no	None	V	no	no	H	no	0	0	0	no
chr11	118481290	118482186	10.23	13.314	13.498	8.346	1.301	1.319	0.816	0.167	0.05	0.006	no	no	yes	no	no	no	None	VII	no	no	F	no	0	0	0	yes
chr11	118491383	118492734	6.74	11.155	8.027	6.019	1.655	1.191	0.893	0.093	0.765	0.014	no	no	yes	no	no	no	None	IX	no	no	I	no	0	0	0	no
chr11	118529650	118531220	9.282	16.774	11.367	7.697	1.807	1.225	0.829	0.203	0.61	0.03	no	no	yes	no	no	no	None	VII	no	no	I	no	0	0	0	yes
chr11	118560332	118561572	8.269	14.172	16.785	6.48	1.714	2.03	0.784	0.183	0.035	0.054	no	yes	no	no	no	no	None	VII	no	no	C	yes	3.52809	11.3846	3.22686	yes
chr11	118767114	118768151	6.727	7.486	9.204	6.871	1.113	1.368	1.021	0.235	0.231	0.021	no	no	yes	no	yes	yes	CXCR5	IX	no	no	F	no	0	0	0	no
chr11	118785748	118786955	5.942	6.285	6.884	7.419	1.058	1.159	1.249	0.532	0.248	0.033	no	no	yes	no	yes	no	None	II	no	no	F	no	0	0	0	no
chr11	118794380	118797422	5.838	8.062	10.741	7.448	1.381	1.84	1.276	0.015	0.059	0.01	yes	no	yes	no	yes	no	None	IX	no	no	H	no	0	0	0	no
chr11	118899569	118901929	5.59	8.632	7.885	4.72	1.544	1.411	0.844	0.18	0.204	0.033	no	no	yes	no	yes	yes	SLC37A4	II	no	no	I	yes	6.87321	13.73	1.99761	no
chr11	118936162	118936853	4.066	5.348	8.096	5.468	1.315	1.991	1.345	0.015	0.009	0.301	yes	yes	no	no	yes	no	None	II	no	no	H	no	0	0	0	no
chr11	119153195	119153693	2.183	3.031	5.633	4.216	1.389	2.58	1.931	0.823	0.001	0.168	no	yes	no	no	yes	no	None	V	no	no	E	no	0	0	0	no
chr11	119193116	119193510	1.824	4.991	3.347	3.29	2.736	1.835	1.803	0.037	0.014	0.204	yes	yes	no	no	yes	no	None	VIII	no	no	E	no	0	0	0	no
chr11	119208022	119209507	6.63	7.389	9.512	8.383	1.114	1.435	1.265	0.741	0.002	0.019	no	yes	yes	no	yes	yes	RNF26	IX	no	no	H	yes	4.66181	9.80791	2.10388	no
chr11	119229995	119231147	4.461	10.28	7.879	5.462	2.304	1.766	1.224	0.046	0.312	0.566	yes	no	no	no	no	no	None	II	no	no	C	no	0	0	0	no
chr11	119231817	119236476	8.196	11.282	13.999	8.449	1.376	1.708	1.031	0.159	0.036	0.692	no	yes	no	no	no	yes	USP2	I	no	yes	H	no	0	0	0	no
chr11	119292628	119293698	2.656	5.347	3.774	2.531	2.014	1.421	0.953	0.035	0.208	0.52	yes	no	no	no	no	yes	THY1	VIII	no	no	I	no	0	0	0	no
chr11	119297891	119298461	2.545	3.915	6.445	3.075	1.538	2.532	1.208	0.198	0.014	0.751	no	yes	no	no	no	no	None	IV	no	no	H	no	0	0	0	no
chr11	119443677	119445056	10.297	7.119	8.929	8.295	0.691	0.867	0.806	0.052	0.777	0.016	no	no	yes	no	no	no	None	IX	no	no	G	no	0	0	0	no
chr11	119561706	119562486	3.775	5.913	7.088	5.089	1.566	1.878	1.348	0.005	0.087	0.031	yes	no	yes	no	no	no	None	IV	no	no	H	no	0	0	0	yes
chr11	119565176	119565449	2.252	4.263	5.757	2.059	1.893	2.557	0.914	0.001	0.052	0.184	yes	no	no	no	no	no	None	VIII	no	no	C	no	0	0	0	yes
chr11	120206545	120208310	4.984	8.874	7.131	7.254	1.781	1.431	1.456	0.104	0.023	0.199	no	yes	no	no	no	yes	ARHGEF12	II	no	no	I	yes	4.13697	5.66205	1.36865	no
chr11	120856661	120857518	5.502	8.539	10.248	7.054	1.552	1.863	1.282	0.104	0.014	0.067	no	yes	no	no	no	no	None	IX	no	no	H	yes	3.39459	7.2543	2.13702	no
chr11	121758232	121758673	0.903	3.515	5.019	4.234	3.892	5.557	4.688	0.008	0.001	0.059	yes	yes	no	yes	no	no	None	V	no	yes	A	no	0	0	0	no
chr11	122129376	122129903	4.237	2.587	4.444	3.236	0.611	1.049	0.764	0.079	0.566	0.026	no	no	yes	yes	no	no	None	VIII	no	no	G	no	0	0	0	no
chr11	122362189	122362537	4.477	1.682	3.087	1.571	0.376	0.69	0.351	0.02	0.271	0.02	yes	no	yes	no	no	no	None	VIII	no	no	G	no	0	0	0	no
chr11	122525585	122528019	6.414	16.009	13.442	7.098	2.496	2.096	1.107	0.212	0.026	0.221	no	yes	no	no	no	yes	UBASH3B	VII	no	yes	C	no	0	0	0	no
chr11	122615761	122618681	5.568	8.802	13.447	8.629	1.581	2.415	1.55	0.119	0.003	0.033	no	yes	yes	no	no	no	None	I	no	no	E	no	0	0	0	no
chr11	122649881	122650427	2.971	4.838	5.972	6.291	1.628	2.01	2.117	0.865	0.014	0.065	no	yes	no	no	no	no	None	V	no	yes	E	no	0	0	0	no
chr11	122652165	122652801	4.462	6.528	6.489	4.422	1.463	1.454	0.991	0.033	0.002	0.471	yes	yes	no	no	no	no	None	IV	no	no	I	yes	4.01314	8.19631	2.04237	no
chr11	123008139	123008912	6.845	11.222	9.925	7.87	1.639	1.45	1.15	0.128	0.022	0.235	no	yes	no	no	no	no	None	IX	no	no	I	no	0	0	0	no
chr11	123009804	123010248	4.702	2.032	5.68	5.453	0.432	1.208	1.16	0.002	0.141	0.831	yes	no	no	no	no	no	None	V	no	no	F	no	0	0	0	no
chr11	123232980	123234564	5.203	4.937	6.08	4.047	0.949	1.169	0.778	0.763	0.404	0.035	no	no	yes	no	no	no	None	V	no	no	F	no	0	0	0	no
chr11	123280802	123281506	4.899	4.403	5.398	6.835	0.899	1.102	1.395	0.054	0.017	0.414	no	yes	no	no	no	no	None	V	no	no	F	no	0	0	0	no
chr11	123305016	123306218	1.98	4.443	3.092	2.275	2.244	1.562	1.149	0.006	0.213	0.361	yes	no	no	no	no	no	None	VIII	no	no	C	no	0	0	0	no
chr11	123346241	123346566	2.775	1.368	4.13	3.175	0.493	1.488	1.144	0.184	0.001	0.242	no	yes	no	no	no	no	None	VIII	no	no	F	no	0	0	0	yes
chr11	123381951	123382445	3.182	6.303	5.107	4.981	1.981	1.605	1.565	0.023	0.275	0.871	yes	no	no	no	no	no	None	IV	no	no	C	no	0	0	0	no
chr11	123420426	123421432	6.882	6.287	6.551	5.682	0.914	0.952	0.826	0.035	0.052	0.246	yes	no	no	no	no	no	None	II	no	no	G	no	0	0	0	no
chr11	123441866	123442296	5.245	5.112	2.869	2.452	0.975	0.547	0.467	0.202	0.059	0.035	no	no	yes	no	no	no	None	VIII	no	no	G	no	0	0	0	no
chr11	123447624	123448151	3.193	7.188	8.434	4.51	2.251	2.641	1.412	0.02	0.022	0.798	yes	yes	no	no	no	no	None	II	no	no	E	yes	4.07908	9.04912	2.21842	yes
chr11	123941264	123942680	3.961	1.142	2.443	3.787	0.288	0.617	0.956	0.007	0.515	0.697	yes	no	no	no	no	no	None	VIII	no	no	G	yes	3.52675	6.6823	1.89475	no
chr11	123972417	123972830	4.566	2.033	2.735	3.244	0.445	0.599	0.71	0.023	0.589	0.802	yes	no	no	no	no	no	None	VIII	no	no	G	no	0	0	0	no
chr11	123985842	123986305	5.237	6.032	7.601	4.248	1.152	1.451	0.811	0.385	0.028	0.09	no	yes	no	no	no	yes	VWA5A	II	no	no	F	no	0	0	0	no
chr11	124065877	124066229	4.385	4.352	5.139	4.833	0.992	1.172	1.102	0.005	0.079	0.145	yes	no	no	no	no	no	None	V	no	no	F	no	0	0	0	yes
chr11	124938789	124944286	9.252	11.646	8.167	13.524	1.259	0.883	1.462	0.016	0.419	0.528	yes	no	no	no	no	no	None	I	yes	no	F	no	0	0	0	no
chr11	124960853	124961870	3.869	4.498	5.129	2.852	1.163	1.326	0.737	0.388	0.027	0.804	no	yes	no	no	no	no	None	V	no	no	F	yes	3.52809	6.14799	1.74258	yes
chr11	125325749	125326589	1.103	2.562	4.799	2.419	2.322	4.35	2.193	0.947	0.039	0.326	no	yes	no	no	no	no	None	VIII	no	no	B	no	0	0	0	no
chr11	125381499	125385896	5.733	5.602	6.502	4.705	0.977	1.134	0.821	0.944	0.424	0.017	no	no	yes	no	no	no	None	II	no	no	F	no	0	0	0	no
chr11	125388985	125390424	3.838	2.548	3.008	1.243	0.664	0.784	0.324	0.409	0.333	0.016	no	no	yes	no	no	no	None	VIII	no	no	G	no	0	0	0	no
chr11	125464498	125465436	6.736	6.296	6.46	4.24	0.935	0.959	0.629	0.882	0.977	0.018	no	no	yes	no	no	no	None	IV	no	no	G	no	0	0	0	no
chr11	125468779	125469468	4.607	5.599	3.361	4.441	1.215	0.729	0.964	0.022	0.486	0.694	yes	no	no	no	no	no	None	V	no	yes	F	no	0	0	0	no
chr11	125701932	125702271	5.564	7.175	7.147	5.73	1.29	1.285	1.03	0.759	0	0.44	no	yes	no	no	no	no	None	II	no	no	F	no	0	0	0	no
chr11	125837363	125838731	5.718	6.904	5.166	6.04	1.208	0.903	1.056	0.023	0.17	0.179	yes	no	no	no	no	no	None	II	no	no	F	no	0	0	0	no
chr11	126026622	126028879	6.935	10.042	8.066	7.664	1.448	1.163	1.105	0.04	0.571	0.757	yes	no	no	no	no	no	None	IX	no	no	F	no	0	0	0	no
chr11	126179598	126181908	5.542	5.39	7.222	5.482	0.973	1.303	0.989	0.543	0.039	0.651	no	yes	no	no	no	no	None	II	no	no	F	no	0	0	0	yes
chr11	126187385	126189898	4.922	5.519	5.616	6.904	1.121	1.141	1.403	0.132	0.752	0.022	no	no	yes	no	no	no	None	II	no	no	F	no	0	0	0	no
chr11	126206063	126207649	3.704	4.33	3.542	1.062	1.169	0.956	0.287	0.854	0.818	0.013	no	no	yes	no	no	no	None	VIII	no	no	G	no	0	0	0	no
chr11	126223199	126223635	4.868	6.904	8.435	7.063	1.418	1.733	1.451	0.769	0.021	0.126	no	yes	no	no	no	no	None	II	no	no	H	no	0	0	0	no
chr11	126337914	126338401	3.545	3.438	3.213	2.507	0.97	0.906	0.707	0.04	0.211	0.222	yes	no	no	no	no	no	None	VIII	no	no	G	no	0	0	0	no
chr11	126369053	126369608	4.99	4.912	4.895	6.076	0.984	0.981	1.218	0.645	0.876	0.001	no	no	yes	no	no	no	None	V	no	no	F	no	0	0	0	no
chr11	128539379	128540494	5.53	6.234	9.182	2.656	1.127	1.661	0.48	0.078	0.065	0.005	no	no	yes	no	no	no	None	IV	no	no	F	no	0	0	0	no
chr11	128700869	128701770	4.832	3.743	6.346	4.19	0.775	1.313	0.867	0.198	0.028	0.177	no	yes	no	no	no	no	None	V	no	no	F	yes	3.49636	7.58976	2.17076	yes
chr11	128729688	128730104	5.867	10.833	10.11	3.144	1.847	1.723	0.536	0.14	0.015	0.03	no	yes	yes	no	no	no	None	IX	no	no	I	yes	7.05351	15.4565	2.19132	yes
chr11	129183024	129186334	7.324	4.967	5.889	6.94	0.678	0.804	0.948	0.034	0.457	0.459	yes	no	no	no	no	no	None	II	no	no	G	no	0	0	0	no
chr11	129200402	129201354	3.875	2.919	4.043	4.679	0.753	1.043	1.207	0.452	0.59	0.007	no	no	yes	no	no	no	None	V	no	no	F	no	0	0	0	no
chr11	129400127	129401040	5.476	7.462	11.374	7.83	1.363	2.077	1.43	0.077	0.018	0.624	no	yes	no	no	no	no	None	IX	no	no	H	no	0	0	0	no
chr11	129508781	129509665	7.364	5.946	7.092	3.424	0.807	0.963	0.465	0.411	0.914	0.019	no	no	yes	no	no	no	None	IV	no	no	G	no	0	0	0	no
chr11	129512899	129513983	4.612	4.661	6.929	3.737	1.011	1.502	0.81	0.922	0.043	0.12	no	yes	no	no	no	no	None	V	no	no	F	no	0	0	0	no
chr11	129620328	129621111	9.912	12.123	11.551	9.467	1.223	1.165	0.955	0.083	0.037	0.4	no	yes	no	no	no	no	None	I	no	no	F	yes	3.43661	16.3301	4.75179	yes
chr11	129637059	129637356	4.743	6.666	6.637	3.155	1.405	1.399	0.665	0.011	0.052	0.116	yes	no	no	no	no	no	None	IV	no	no	I	yes	3.04618	5.01845	1.64746	no
chr11	129838331	129839311	2.829	4.144	6.44	4.806	1.465	2.276	1.699	0.663	0.155	0.027	no	no	yes	no	no	no	None	V	no	no	E	no	0	0	0	no
chr11	129920898	129921425	4.656	5.687	6.607	4.857	1.221	1.419	1.043	0.903	0.024	0.089	no	yes	no	no	no	no	None	II	no	no	F	no	0	0	0	no
chr11	129976444	129977125	4.427	3.031	6.238	4.983	0.685	1.409	1.126	0.238	0.006	0.768	no	yes	no	no	no	no	None	V	no	no	F	no	0	0	0	no
chr11	130046837	130047958	4.33	1.306	5.215	2.894	0.302	1.205	0.668	0.019	0.695	0.108	yes	no	no	no	no	no	None	V	no	no	G	no	0	0	0	no
chr11	130049623	130051469	4.741	5.52	6.015	1.063	1.164	1.269	0.224	0.061	0.36	0.001	no	no	yes	no	no	no	None	IV	no	no	F	no	0	0	0	no
chr11	130058876	130061273	4.241	5.519	5.15	5.058	1.301	1.214	1.193	0.334	0.015	0.161	no	yes	no	no	no	no	None	V	no	no	F	no	0	0	0	no
chr11	130864696	130865765	5.381	5.611	6.786	6.769	1.043	1.261	1.258	0.174	0.042	0.776	no	yes	no	no	no	no	None	II	no	no	F	no	0	0	0	no
chr11	131808065	131808740	4.354	5.666	9.337	5.665	1.301	2.144	1.301	0.276	0.026	0.77	no	yes	no	no	no	no	None	II	no	yes	H	no	0	0	0	no
chr11	131914145	131916346	4.069	3.843	4.54	4.555	0.945	1.116	1.119	0.264	0.043	0.362	no	yes	no	no	no	no	None	V	yes	no	F	no	0	0	0	no
chr11	131924687	131925892	6.482	4.014	5.672	6.146	0.619	0.875	0.948	0.015	0.57	0.149	yes	no	no	no	no	no	None	V	no	yes	G	no	0	0	0	no
chr11	131969580	131970016	5.083	5.022	7.042	6.55	0.988	1.385	1.289	0.908	0.032	0.505	no	yes	no	no	no	no	None	II	no	no	F	no	0	0	0	no
chr11	133704924	133705718	6.433	7.475	6.541	5.85	1.162	1.017	0.909	0.02	0.61	0.689	yes	no	no	no	no	no	None	II	no	yes	F	no	0	0	0	yes
chr11	134129660	134131265	7.683	4.991	7.477	7.477	0.65	0.973	0.973	0.04	0.683	0.522	yes	no	no	no	no	no	None	II	no	no	G	no	0	0	0	no
chr11	134145417	134146619	2.79	5.349	4.271	2.35	1.917	1.531	0.842	0.013	0.469	0.489	yes	no	no	no	no	yes	GLB1L3	VIII	no	yes	I	no	0	0	0	no
chr12	510500	510914	8.1	13.236	11.2	7.115	1.634	1.383	0.878	0.167	0.035	0.239	no	yes	no	no	no	yes	CCDC77	VII	no	no	I	no	0	0	0	no
chr12	515938	516416	5.19	3.992	6.928	4.681	0.769	1.335	0.902	0.12	0.272	0.006	no	no	yes	no	no	no	None	V	no	no	F	no	0	0	0	no
chr12	672566	673133	2.362	4.905	3.988	2.35	2.076	1.688	0.995	0.049	0.345	0.833	yes	no	no	no	no	no	None	VIII	no	no	C	no	0	0	0	no
chr12	684943	686073	3.971	6.472	7.248	5.335	1.63	1.825	1.343	0.003	0.413	0.947	yes	no	no	no	no	no	None	II	no	no	H	yes	4.70234	7.45221	1.58479	yes
chr12	1058599	1059582	6.879	8.015	7.123	5.453	1.165	1.036	0.793	0.331	0.23	0.039	no	no	yes	no	no	yes	RAD52	II	no	no	F	yes	4.11455	7.10736	1.72737	yes
chr12	1597947	1598851	3.363	4.034	6.687	2.556	1.2	1.988	0.76	0.187	0.012	0.188	no	yes	no	yes	no	no	None	IV	no	no	H	no	0	0	0	no
chr12	1642239	1643204	3.764	6.418	6.328	3.938	1.705	1.681	1.046	0.002	0.542	0.188	yes	no	no	yes	no	no	None	IV	no	no	I	no	0	0	0	no
chr12	1743823	1744203	6.418	5.646	5.851	2.149	0.88	0.912	0.335	0.559	0.236	0.019	no	no	yes	yes	no	no	None	IV	no	no	G	yes	3.52675	5.9228	1.67939	yes
chr12	1770747	1771408	5.199	6.852	5.78	4.967	1.318	1.112	0.955	0.042	0.886	0.912	yes	no	no	yes	no	no	None	II	no	no	F	no	0	0	0	no
chr12	2609488	2609842	1.103	5.889	6.499	1.153	5.337	5.89	1.045	0.054	0.049	0.423	no	yes	no	yes	no	no	None	IV	no	no	D	no	0	0	0	no
chr12	3837331	3838262	4.071	5.339	5.775	4.065	1.311	1.418	0.998	0.047	0.248	0.854	yes	no	no	no	no	no	None	V	no	no	F	no	0	0	0	no
chr12	4245003	4245712	3.476	3.671	6.992	4.973	1.056	2.011	1.43	0.228	0.042	0.929	no	yes	no	no	no	no	None	V	no	no	H	no	0	0	0	no
chr12	4252040	4252531	6.347	7.038	10.087	7.462	1.109	1.589	1.176	0.387	0.083	0.03	no	no	yes	no	no	no	None	IX	no	no	H	no	0	0	0	no
chr12	4397878	4399212	4.804	5.888	5.564	4.334	1.226	1.158	0.902	0.023	0.079	0.047	yes	no	yes	no	no	no	None	V	no	no	F	no	0	0	0	no
chr12	4548348	4548817	5.564	3.762	6.56	5.517	0.676	1.179	0.991	0.356	0.034	0.518	no	yes	no	no	no	no	None	V	no	no	F	no	0	0	0	no
chr12	6335448	6336090	4.938	3.476	5.131	2.059	0.704	1.039	0.417	0.665	0.419	0.011	no	no	yes	no	no	no	None	VIII	no	no	G	no	0	0	0	no
chr12	6560501	6561896	4.747	7.386	5.617	3.146	1.556	1.183	0.663	0.045	0.995	0.015	yes	no	yes	no	no	yes	CD27-AS1	IV	no	yes	I	no	0	0	0	no
chr12	6644292	6645038	3.87	6.979	5.891	4.973	1.804	1.522	1.285	0.023	0.264	0.594	yes	no	no	no	no	yes	GAPDH	IV	no	no	H	no	0	0	0	no
chr12	6715523	6717827	5.234	4.806	3.38	3.458	0.918	0.646	0.661	0.801	0.064	0.003	no	no	yes	no	no	yes	CHD4	V	no	no	G	no	0	0	0	no
chr12	6797745	6799004	3.265	6.074	5.424	2.562	1.861	1.661	0.785	0.009	0.57	0.188	yes	no	no	no	no	yes	ZNF384	IV	no	no	I	no	0	0	0	no
chr12	6960989	6961881	2.335	4.098	3.928	1.762	1.755	1.682	0.755	0.002	0.238	0.195	yes	no	no	no	no	yes	USP5	VIII	no	no	I	no	0	0	0	no
chr12	7341117	7342433	4.038	7.106	5.873	4.273	1.76	1.455	1.058	0.011	0.424	0.337	yes	no	no	no	no	yes	PEX5	IV	no	no	I	no	0	0	0	no
chr12	7990037	7990361	2.987	1.481	6.561	2.512	0.496	2.197	0.841	0.438	0.015	0.184	no	yes	no	no	no	no	None	VIII	no	no	F	no	0	0	0	no
chr12	8112344	8112655	1.238	3.731	1.592	1.243	3.014	1.286	1.005	0.048	0.899	0.423	yes	no	no	yes	no	no	None	VIII	no	no	C	no	0	0	0	no
chr12	9102002	9102795	1.951	4.86	4.052	1.186	2.491	2.077	0.608	0.032	0.316	0.188	yes	no	no	no	no	yes	M6PR	VIII	no	no	C	no	0	0	0	no
chr12	9800409	9801286	3.81	6.779	5.079	4.665	1.779	1.333	1.224	0.014	0.48	0.826	yes	no	no	no	no	yes	LOC374443	IV	no	no	I	no	0	0	0	no
chr12	9803300	9803670	4.268	4.45	9.519	6.661	1.042	2.23	1.561	0.208	0.005	0.28	no	yes	no	no	no	no	None	II	no	no	H	no	0	0	0	no
chr12	10826415	10827100	2.198	2.928	5.173	4.289	1.332	2.353	1.951	0.215	0.262	0.027	no	no	yes	no	no	yes	STYK1	V	no	no	E	yes	3.52675	4.73824	1.34351	no
chr12	11872621	11873070	6.169	5.654	9.203	5.226	0.917	1.492	0.847	0.39	0.042	0.161	no	yes	no	no	no	no	None	II	no	no	F	no	0	0	0	no
chr12	11903213	11903840	4.773	4.375	7.547	6.472	0.917	1.581	1.356	0.761	0.045	0.932	no	yes	no	no	no	no	None	II	no	no	H	no	0	0	0	no
chr12	11926456	11927356	8.263	9.493	12.302	8.812	1.149	1.489	1.066	0.776	0.029	0.646	no	yes	no	no	no	no	None	I	no	no	F	no	0	0	0	no
chr12	12163009	12163889	4.229	6.17	8.289	6.05	1.459	1.96	1.431	0.268	0.042	0.555	no	yes	no	no	no	no	None	II	yes	no	H	no	0	0	0	no
chr12	13197178	13197435	3.463	5.472	3.424	2.036	1.58	0.989	0.588	0.025	0.872	0.187	yes	no	no	no	no	yes	KIAA1467	VIII	no	no	I	no	0	0	0	no
chr12	14518277	14519073	2.627	5.218	3.849	2.629	1.987	1.465	1.001	0.022	0.206	0.223	yes	no	no	no	no	yes	ATF7IP	VIII	no	no	I	no	0	0	0	no
chr12	15113746	15114845	3.371	4.619	7.561	4.51	1.37	2.243	1.338	0.727	0.019	0.845	no	yes	no	no	no	yes	ARHGDIB	V	no	yes	H	no	0	0	0	no
chr12	16064101	16064603	4.21	7.524	8.051	3.519	1.787	1.912	0.836	0.032	0.356	0.302	yes	no	no	no	no	yes	DERA	IV	no	no	C	no	0	0	0	no
chr12	22145668	22146391	4.467	5.619	5.384	4.622	1.258	1.205	1.035	0.709	0.001	0.816	no	yes	no	no	no	no	None	V	no	no	F	no	0	0	0	no
chr12	22881991	22883263	2.111	2.822	4.01	3.874	1.337	1.899	1.835	0.786	0.026	0.568	no	yes	no	no	no	no	None	VIII	no	no	H	no	0	0	0	no
chr12	22952445	22953281	5.345	2.131	4.407	5.524	0.399	0.824	1.034	0.016	0.348	0.436	yes	no	no	no	no	no	None	V	no	no	G	no	0	0	0	no
chr12	24644655	24645863	3.922	1.499	3.69	1.228	0.382	0.941	0.313	0.006	0.27	0.006	yes	no	yes	no	no	no	None	VIII	no	no	G	no	0	0	0	no
chr12	24714010	24716908	4.524	5.974	4.5	3.487	1.32	0.995	0.771	0.171	0.742	0.046	no	no	yes	no	no	yes	SOX5	IV	no	no	F	no	0	0	0	no
chr12	24814309	24815426	8.984	10.574	14.07	11.658	1.177	1.566	1.298	0.352	0.034	0.664	no	yes	no	no	no	no	None	I	no	no	H	no	0	0	0	no
[truncated: 6,980 more rows]
