# Supplementary material for: Epigenome-wide effects of vitamin D and their impact on the transcriptome of human monocytes involve CTCF
Source: Oxford University Press journal article supplement (doi:10.1093/nar/gkv1519), 2015-12-28
Supplement: gkv1519_Supplementary_Data.zip [file gkv1519_Supplementary_Data.zip › nar-01887-x-2015-File009.xlsx]

## Sheet: Sheet1
Chr	Start	End	1,25D	EtOH	FC	TSS	TSS gene	DR3	VDR (EtOH)	VDR (1,25D)	FAIRE (1,25D dep.)
chr1	805229	805457	5.33052	5.29013	1.00763	no	-	no	no	no	yes
chr1	840061	840324	11.2533	5.87792	1.91451	no	-	no	no	no	no
chr1	873570	873689	4.14596	0	0	no	-	no	no	no	no
chr1	886858	887081	4.73824	0	0	no	-	no	no	no	no
chr1	911520	911791	4.76577	0	0	no	-	no	no	no	no
chr1	919560	919881	6.35032	5.29013	1.20041	no	-	no	no	no	no
chr1	937150	937490	0	10.8826	0	no	-	no	no	no	no
chr1	937205	937512	10.0688	6.61517	1.52207	no	-	no	no	no	no
chr1	954795	954951	5.33052	6.30044	0.846055	no	-	no	no	no	no
chr1	968411	968756	7.10736	2.39133	2.97214	no	-	no	no	no	no
chr1	994702	995024	10.9687	5.87792	1.86609	no	-	no	no	no	no
chr1	999197	999483	3.33522	4.48079	0.744337	no	-	no	no	no	no
chr1	1057337	1057757	12.4379	4.11455	3.0229	no	-	no	no	no	yes
chr1	1195745	1195888	3.55368	0	0	no	-	no	no	no	no
chr1	1225586	1225775	3.79488	5.87792	0.645616	no	-	no	no	no	no
chr1	1227300	1227497	5.33052	5.29013	1.00763	no	-	no	no	no	no
chr1	1235592	1235799	4.14596	0	0	no	-	no	no	no	no
chr1	1237399	1237539	6.51508	6.46571	1.00764	no	-	no	no	no	no
chr1	1243425	1243579	4.73824	0	0	yes	ACAP3	no	no	no	no
chr1	1253895	1254071	2.64812	0	0	no	-	no	no	no	no
chr1	1260041	1260156	4.14596	0	0	yes	CPSF3L	no	no	no	no
chr1	1280043	1280324	7.69964	2.75741	2.79234	no	-	no	no	no	no
chr1	1284542	1284882	7.10736	4.11455	1.72737	yes	DVL1	no	no	no	no
chr1	1285054	1285373	6.51508	4.41011	1.47731	no	-	no	no	no	no
chr1	1307353	1307738	10.0688	9.40467	1.07061	no	-	no	no	no	no
chr1	1307439	1307657	0	5.87792	0	no	-	no	no	no	no
chr1	1337366	1337662	5.73759	3.52675	1.62688	no	-	no	no	no	no
chr1	1376318	1376627	9.47648	4.70234	2.01527	no	-	no	no	no	no
chr1	1440212	1440390	4.73824	3.52675	1.34351	no	-	no	no	no	no
chr1	1555517	1555638	5.33052	0	0	no	-	yes	no	no	no
chr1	1597158	1597502	4.73824	3.43661	1.37875	no	-	no	no	no	no
chr1	1597243	1597375	0	2.75741	0	no	-	no	no	no	no
chr1	1695649	1696007	8.8842	9.99247	0.889089	no	-	no	no	no	no
chr1	1695705	1695982	0	4.41011	0	no	-	no	no	no	no
chr1	1720510	1720758	5.33052	5.87792	0.906872	no	-	no	no	no	no
chr1	1728000	1728117	0	4.70234	0	no	-	yes	no	no	no
chr1	1728014	1728190	6.51508	5.29214	1.23109	no	-	yes	no	no	no
chr1	1752144	1752270	4.61841	0	0	no	-	no	no	no	no
chr1	1767499	1767719	2.64812	0	0	no	-	no	no	no	no
chr1	1785063	1785180	0	3.04618	0	no	-	no	no	no	no
chr1	1826748	1826863	2.9614	0	0	no	-	no	no	no	no
chr1	1837686	1838092	0	3.43661	0	no	-	no	no	no	no
chr1	1837817	1837933	4.73824	13.5192	0.350482	no	-	no	no	no	no
chr1	1840473	1840769	6.51508	3.52809	1.84663	no	-	no	no	no	no
chr1	1875422	1875643	7.69964	5.29013	1.45547	no	-	yes	no	no	yes
chr1	1886434	1886549	3.55368	0	0	no	-	no	no	no	no
chr1	1891451	1891976	7.10736	3.52675	2.01527	no	-	no	no	no	no
chr1	1976231	1976628	13.0302	4.70234	2.77099	no	-	no	no	no	no
chr1	1977855	1978131	3.1049	3.52675	0.880386	no	-	no	no	no	no
chr1	2023145	2023308	6.51508	0	0	no	-	yes	no	no	no
chr1	2040152	2040279	4.73824	0	0	no	-	no	no	no	no
chr1	2071232	2071772	18.3607	6.46571	2.8397	no	-	no	no	no	no
chr1	2094728	2094906	3.46381	4.70234	0.736614	no	-	no	no	no	no
chr1	2105696	2106082	9.47648	4.11455	2.30316	no	-	no	no	no	no
chr1	2126623	2126868	3.1148	5.73315	0.543296	no	-	no	no	no	no
chr1	2144140	2144371	3.97218	0	0	yes	C1orf86	no	no	no	no
chr1	2160641	2160778	4.14596	6.46571	0.641223	yes	SKI	no	yes	yes	no
chr1	2160671	2160926	0	3.52675	0	yes	SKI	no	yes	yes	no
chr1	2243066	2243228	0	3.52675	0	no	-	no	no	no	no
chr1	2246534	2247098	9.47648	2.64607	3.58134	no	-	no	no	no	no
chr1	2246641	2246914	0	6.46571	0	no	-	no	no	no	no
chr1	2313248	2313515	7.69964	6.46571	1.19084	no	-	no	no	no	no
chr1	2314939	2315056	0	4.70234	0	no	-	no	no	no	no
chr1	2345653	2346118	0	4.11455	0	no	-	no	no	no	no
chr1	2345862	2346154	5.73759	2.93896	1.95225	no	-	no	no	no	no
chr1	2361488	2361788	5.9228	0	0	no	-	yes	no	no	no
chr1	2479349	2479775	7.45221	3.52675	2.11305	no	-	no	no	no	no
chr1	2486421	2486564	5.33052	2.41273	2.20933	no	-	no	no	no	no
chr1	2493431	2493618	4.73824	3.52675	1.34351	no	-	yes	yes	yes	no
chr1	2517871	2518051	3.72611	0	0	yes	FAM213B	no	no	no	no
chr1	2703239	2703494	4.73824	11.168	0.424267	no	-	no	no	no	no
chr1	2718267	2718472	5.33052	0	0	no	-	no	no	no	no
chr1	2885833	2885973	0	2.93896	0	no	-	no	no	no	no
chr1	3179150	3179267	0	3.52675	0	no	-	no	no	no	no
chr1	3200546	3200816	4.14596	0	0	no	-	no	no	no	no
chr1	3236508	3236833	4.73824	8.81688	0.537406	no	-	no	no	no	no
chr1	3236638	3236797	0	3.52675	0	no	-	no	no	no	no
chr1	3333739	3333892	3.97218	4.06157	0.977991	no	-	no	no	no	no
chr1	3341346	3341523	4.85488	8.22909	0.589966	no	-	no	no	no	no
chr1	3348007	3348207	4.14596	0	0	no	-	yes	no	no	no
chr1	3369763	3369950	9.47648	8.22909	1.15158	no	-	yes	no	no	no
chr1	3370913	3371056	4.14596	3.44676	1.20286	yes	ARHGEF16	no	no	no	no
chr1	3400475	3400756	4.48486	6.20417	0.722878	no	-	no	no	no	yes
chr1	3407780	3408104	16.5838	4.11455	4.03054	no	-	no	no	no	no
chr1	3434819	3435052	4.85488	4.41011	1.10085	no	-	no	no	no	no
chr1	3441444	3441559	4.14596	0	0	no	-	no	no	no	no
chr1	3481793	3482135	4.14596	3.52675	1.17558	no	-	yes	no	no	no
chr1	3531776	3531985	7.69964	3.52675	2.18321	no	-	yes	no	no	no
chr1	3535619	3535953	6.51508	7.6413	0.852614	no	-	no	no	no	no
chr1	3566480	3566598	3.87722	0	0	yes	WRAP73	no	no	no	yes
chr1	3585539	3585654	4.73824	0	0	no	-	yes	no	no	no
chr1	3640822	3641276	0	3.44676	0	no	-	no	no	no	no
chr1	3640981	3641239	7.06165	4.11455	1.71626	no	-	no	no	no	no
chr1	3827435	3827609	0	4.11455	0	no	-	no	no	no	no
chr1	4144531	4144703	5.33052	0	0	no	-	no	no	no	no
chr1	4156057	4156172	3.55368	0	0	no	-	no	no	no	no
chr1	4199417	4199565	0	4.41011	0	no	-	no	no	no	no
chr1	4337293	4337495	0	4.11455	0	no	-	no	no	no	no
chr1	4508823	4508940	0	3.52675	0	no	-	no	no	no	no
chr1	4523061	4523176	3.55368	0	0	no	-	no	no	no	no
chr1	4645346	4645572	5.9228	0	0	no	-	no	no	no	no
chr1	4712595	4712912	8.3857	5.29013	1.58516	no	-	yes	no	no	no
chr1	4712634	4713061	0	3.52675	0	no	-	yes	no	no	no
chr1	4716402	4716642	6.92762	3.52675	1.96431	no	-	no	no	no	no
chr1	4838035	4838323	0	3.52675	0	no	-	no	no	no	no
chr1	4886233	4886385	5.33052	0	0	no	-	no	no	no	no
chr1	4909185	4909302	0	4.11455	0	no	-	no	no	no	no
chr1	5147277	5147443	0	3.52675	0	no	-	no	no	no	no
chr1	5160558	5160688	4.14596	0	0	no	-	no	no	no	no
chr1	5264837	5264954	0	4.11455	0	no	-	no	no	no	no
chr1	5346331	5346547	0	2.64607	0	no	-	no	no	no	no
chr1	5381247	5381433	3.55368	0	0	no	-	no	no	no	no
chr1	5404344	5404459	3.55368	0	0	no	-	no	no	no	no
chr1	5569930	5570281	0	4.70234	0	no	-	no	no	no	no
chr1	5569930	5570308	11.2533	4.13611	2.72075	no	-	no	no	no	no
chr1	5574586	5574983	0	3.52675	0	no	-	no	no	no	no
chr1	5574654	5574986	11.4752	4.22143	2.71831	no	-	no	no	no	no
chr1	5681153	5681337	3.55368	0	0	no	-	yes	no	no	no
chr1	5684945	5685062	0	3.52675	0	no	-	no	no	no	no
chr1	5697297	5697457	0	3.52675	0	no	-	no	no	no	no
chr1	5697306	5697453	5.12333	5.51482	0.929011	no	-	no	no	no	no
chr1	5713418	5713533	4.14596	0	0	no	-	no	no	no	no
chr1	5805944	5806267	5.86482	7.6413	0.767516	no	-	no	no	no	no
chr1	5964200	5964315	4.73824	0	0	no	-	no	no	no	no
chr1	5976137	5976252	4.25841	5.51482	0.772176	no	-	no	no	no	no
chr1	6035354	6035647	6.89978	4.70234	1.46731	no	-	no	no	no	no
chr1	6035364	6035592	0	4.11455	0	no	-	no	no	no	no
chr1	6040567	6040708	4.12836	0	0	no	-	yes	no	no	no
chr1	6052970	6053085	3.55368	0	0	yes	KCNAB2	no	no	no	no
chr1	6088767	6088930	5.08817	0	0	no	-	no	no	no	no
chr1	6094305	6094420	4.73824	0	0	yes	KCNAB2	no	no	no	no
chr1	6094599	6094772	8.8842	0	0	yes	KCNAB2	no	no	no	no
chr1	6101573	6101865	3.97218	9.40467	0.422363	no	-	no	no	no	no
chr1	6168965	6169152	7.69964	3.79144	2.0308	no	-	no	no	no	no
chr1	6231598	6231901	6.51508	0	0	no	-	no	no	no	yes
chr1	6240447	6240562	4.14596	0	0	no	-	no	no	no	no
chr1	6243695	6243812	4.14596	0	0	no	-	no	no	no	no
chr1	6245907	6246201	8.8842	0	0	no	-	no	no	no	no
chr1	6265247	6265517	7.10736	11.168	0.636401	no	-	no	no	no	no
chr1	6269308	6269450	5.9257	4.00937	1.47796	no	-	no	no	no	yes
chr1	6269784	6269910	4.61099	3.9691	1.16172	no	-	yes	no	no	yes
chr1	6305212	6305427	0	4.70234	0	no	-	no	no	no	no
chr1	6305213	6305377	8.29192	8.82023	0.940102	no	-	no	no	no	no
chr1	6306830	6307261	8.29192	5.29013	1.56743	no	-	no	no	no	no
chr1	6403506	6403766	0	3.52675	0	no	-	yes	no	no	no
chr1	6403580	6403822	10.3914	3.52675	2.94646	no	-	yes	no	no	no
chr1	6407945	6408224	5.33052	5.493	0.970421	no	-	no	no	no	no
chr1	6417502	6417628	5.19571	0	0	no	-	no	no	no	no
chr1	6464818	6464997	5.9228	3.8451	1.54035	no	-	no	no	no	no
chr1	6474489	6474608	4.41353	4.11455	1.07266	no	-	no	no	no	no
chr1	6483485	6483884	9.47648	6.89352	1.37469	no	-	yes	no	no	no
chr1	6498120	6498343	12.4379	6.17416	2.01451	no	-	no	no	no	no
chr1	6500904	6501056	3.55368	0	0	no	-	no	no	no	no
chr1	6508399	6508514	3.53082	4.00937	0.880642	no	-	yes	no	no	no
chr1	6532618	6532746	4.14596	4.70234	0.88168	no	-	no	no	no	no
chr1	6535486	6535839	6.51508	4.11455	1.58342	no	-	no	no	no	no
chr1	6543174	6543327	3.87722	3.94201	0.983564	no	-	no	no	no	no
chr1	6546208	6546323	4.73824	2.83171	1.67328	yes	PLEKHG5	no	no	no	no
chr1	6546505	6546810	3.44989	4.11455	0.838461	no	-	no	no	no	no
chr1	6550008	6550255	3.53082	5.87792	0.600692	yes	PLEKHG5	yes	no	no	no
chr1	6583693	6584044	5.73759	4.70234	1.22016	no	-	no	no	no	no
chr1	6614209	6614885	9.23682	7.6413	1.2088	yes	NOL9	no	no	no	no
chr1	6672811	6672926	4.43111	0	0	no	-	yes	no	no	no
chr1	6682116	6682300	0	5.493	0	no	-	no	no	no	no
chr1	6682802	6682919	0	4.11455	0	no	-	no	no	no	no
chr1	6685084	6685199	4.73824	0	0	yes	THAP3	no	no	no	no
chr1	6694815	6694964	5.33052	0	0	no	-	no	no	no	no
chr1	6706661	6706861	5.9228	9.99247	0.592726	no	-	no	no	no	no
chr1	6706725	6706842	0	3.8451	0	no	-	no	no	no	no
chr1	6761850	6762240	12.0746	10.5843	1.14081	yes	DNAJC11	no	no	no	no
chr1	6780096	6780399	4.82985	7.05351	0.684744	no	-	no	no	no	no
chr1	6787576	6788030	5.94644	3.52675	1.6861	no	-	no	no	no	no
chr1	6803767	6803928	0	4.00937	0	no	-	no	no	no	yes
chr1	6821510	6821625	2.9614	0	0	no	-	no	no	no	no
chr1	6832175	6832292	0	4.70234	0	no	-	yes	no	no	no
chr1	6846562	6846800	0	4.11455	0	no	-	no	no	no	no
chr1	6871964	6872081	0	3.94201	0	no	-	no	no	no	no
chr1	6904451	6904566	3.46381	0	0	no	-	no	no	no	no
chr1	6949707	6949844	0	2.83171	0	no	-	no	no	no	no
chr1	6950018	6950199	5.33052	5.87792	0.906872	no	-	no	no	no	no
chr1	7023399	7023630	5.33052	3.04618	1.7499	no	-	no	no	no	no
chr1	7023476	7023647	0	5.87792	0	no	-	no	no	no	no
chr1	7102882	7103064	5.33052	4.82547	1.10466	no	-	no	no	no	no
chr1	7130505	7130754	4.48486	3.08708	1.45278	no	-	no	no	no	no
chr1	7278155	7278284	4.73824	5.80447	0.816309	no	-	no	no	no	no
chr1	7278353	7278577	7.10736	8.81688	0.806108	no	-	no	no	no	no
chr1	7278364	7278763	0	2.93896	0	no	-	no	no	no	no
chr1	7601364	7601479	3.55368	0	0	no	-	no	no	no	no
chr1	7707260	7707633	12.4379	4.11455	3.0229	no	-	no	no	no	no
chr1	7727619	7727935	11.0338	4.11455	2.68166	no	-	no	no	no	no
chr1	7729545	7729874	11.2533	3.52675	3.19085	no	-	no	no	no	no
chr1	7812964	7813182	5.91106	0	0	no	-	no	no	no	no
chr1	7868383	7868676	0	3.52675	0	no	-	no	no	no	no
chr1	7901292	7901489	3.55368	0	0	no	-	no	no	no	no
chr1	7916616	7916786	7.76547	3.9691	1.95648	no	-	no	no	no	no
chr1	7916620	7916779	0	7.05351	0	no	-	no	no	no	no
chr1	7962905	7963064	10.3914	4.11455	2.52553	no	-	no	no	no	yes
chr1	8002420	8002657	7.114	0	0	no	-	no	no	no	no
chr1	8035300	8035705	0	3.04618	0	no	-	no	no	no	no
chr1	8035390	8035726	5.17484	3.10209	1.66818	no	-	no	no	no	no
chr1	8042363	8042730	5.17484	4.82547	1.0724	no	-	no	no	no	no
chr1	8075215	8075345	3.68113	0	0	no	-	no	no	no	no
chr1	8091316	8091522	7.10736	4.11455	1.72737	no	-	no	no	no	no
chr1	8091367	8091544	0	5.80447	0	no	-	no	no	no	no
chr1	8182536	8182724	4.14596	0	0	no	-	no	no	no	no
chr1	8256162	8256329	0	4.70234	0	no	-	no	no	no	no
chr1	8299057	8299185	4.73824	3.52675	1.34351	no	-	no	no	no	no
chr1	8299072	8299202	0	4.11455	0	no	-	no	no	no	no
chr1	8374415	8374619	7.10736	4.11455	1.72737	no	-	no	no	no	no
chr1	8375857	8376001	4.73824	0	0	no	-	no	no	no	no
chr1	8409102	8409424	6.17894	6.46571	0.955648	no	-	no	no	no	no
chr1	8411831	8411973	4.14596	9.99247	0.414908	no	-	no	no	no	no
chr1	8455956	8456077	5.26245	0	0	no	-	no	no	no	no
chr1	8469109	8469546	2.83164	4.11455	0.688202	no	-	no	no	no	no
chr1	8481571	8481686	2.9614	0	0	no	-	no	no	no	no
chr1	8493164	8493302	2.64812	0	0	no	-	no	no	no	no
chr1	8616583	8616700	0	4.11455	0	no	-	yes	no	no	no
chr1	8621161	8621306	0	3.42199	0	no	-	no	no	no	no
chr1	8621204	8621412	5.51983	8.02317	0.687986	no	-	no	no	no	no
chr1	8688784	8688899	3.2189	0	0	no	-	no	no	no	no
chr1	8731448	8731680	4.41353	7.08286	0.623128	no	-	no	no	no	no
chr1	8786621	8786906	5.29623	8.97055	0.590402	no	-	no	no	no	no
chr1	8817624	8817739	4.88592	0	0	no	-	no	no	no	no
chr1	8824506	8824621	2.64812	0	0	no	-	no	no	no	no
chr1	8908757	8909247	0	4.11455	0	no	-	no	no	no	yes
chr1	8908966	8909180	7.69964	3.96818	1.94035	no	-	no	no	no	yes
chr1	8919546	8919737	6.51508	0	0	no	-	no	no	no	no
chr1	8922501	8922798	3.53082	7.6413	0.462071	no	-	no	no	no	no
chr1	8989943	8990098	4.14596	0	0	no	-	no	no	no	no
chr1	9014894	9015009	3.55368	0	0	no	-	no	no	no	no
chr1	9022955	9023172	0	4.11455	0	no	-	no	no	no	no
chr1	9023062	9023287	5.77301	3.08708	1.87006	no	-	no	no	no	no
chr1	9048106	9048497	8.82706	4.70234	1.87716	no	-	no	no	no	no
chr1	9065267	9065617	11.8456	9.3381	1.26852	no	-	no	no	no	no
chr1	9070196	9070381	2.41492	0	0	no	-	yes	no	no	no
chr1	9144897	9145014	0	3.52675	0	no	-	no	no	no	no
chr1	9161689	9161913	8.65952	4.11455	2.10461	no	-	no	no	no	yes
chr1	9161714	9162011	0	4.11455	0	no	-	no	no	no	yes
chr1	9170888	9171202	10.9687	12.6643	0.866114	no	-	no	no	no	no
chr1	9202333	9202562	4.41353	0	0	no	-	no	no	no	no
chr1	9241288	9241686	15.8019	3.44676	4.58456	no	-	no	no	no	no
chr1	9256579	9256817	8.8842	14.6948	0.604581	no	-	no	no	no	yes
chr1	9294374	9294734	6.59319	3.52809	1.86877	yes	H6PD	no	no	no	no
chr1	9295041	9295176	3.68304	0	0	yes	H6PD	no	no	no	no
chr1	9310168	9310384	3.72611	6.89352	0.540524	no	-	no	no	no	no
chr1	9327307	9327456	6.51508	3.91337	1.66483	no	-	no	no	no	no
chr1	9349126	9349347	0	4.11455	0	no	-	no	no	no	no
chr1	9349129	9349332	8.3857	4.11455	2.03806	no	-	no	no	no	no
chr1	9356031	9356191	4.73824	0	0	no	-	no	no	no	no
chr1	9515776	9516193	0	4.11455	0	no	-	no	no	no	no
chr1	9515915	9516222	9.47648	5.94054	1.59522	no	-	no	no	no	no
chr1	9551214	9551401	6.89978	3.39459	2.03258	no	-	no	no	no	no
chr1	9555348	9555577	8.29192	5.58466	1.48477	no	-	no	no	no	no
chr1	9634028	9634174	2.46904	4.70234	0.525066	no	-	no	no	no	no
chr1	9648533	9648792	0	4.70234	0	yes	TMEM201	no	no	no	yes
chr1	9648604	9648834	11.7106	4.70234	2.49038	yes	TMEM201	no	no	no	yes
chr1	9675624	9675948	13.0302	9.73705	1.3382	no	-	yes	no	no	no
chr1	9687000	9687428	11.7836	2.6384	4.46621	no	-	no	no	no	no
chr1	9687063	9687420	0	4.11455	0	no	-	no	no	no	no
chr1	9712818	9712967	4.25841	0	0	no	-	no	no	no	no
chr1	9781916	9782178	0	4.70234	0	no	-	no	no	no	no
chr1	9785136	9785370	23.6912	7.75033	3.0568	no	-	no	no	no	no
chr1	9785158	9785402	0	3.44676	0	no	-	no	no	no	no
chr1	9792541	9792656	4.14596	0	0	no	-	no	no	no	no
chr1	9816245	9816360	3.49334	0	0	no	-	no	no	no	no
chr1	9829244	9829359	4.14596	0	0	no	-	no	no	no	no
chr1	9927502	9927918	0	3.52809	0	no	-	no	no	no	no
chr1	9927608	9927823	7.06165	4.11455	1.71626	no	-	no	no	no	no
chr1	9934890	9935282	4.48486	4.11455	1.09	no	-	no	no	no	no
chr1	9937031	9937146	3.55368	0	0	no	-	no	no	no	no
chr1	9952886	9953125	3.81262	0	0	no	-	yes	no	no	no
chr1	10002533	10002702	0	3.91337	0	yes	LZIC	no	no	no	no
chr1	10002559	10002681	3.55368	8.37921	0.424107	yes	LZIC	no	no	no	no
chr1	10010453	10010760	9.04564	5.87792	1.53892	no	-	no	no	no	no
chr1	10065143	10065258	3.08947	0	0	no	-	no	no	no	no
chr1	10092605	10092912	7.0791	4.11455	1.7205	yes	UBE4B	no	no	no	no
chr1	10213123	10213348	3.39797	2.64607	1.28416	no	-	no	no	no	no
chr1	10270253	10270633	10.759	6.46571	1.66401	yes	KIF1B	no	no	no	yes
chr1	10368089	10368204	2.9614	0	0	no	-	no	no	no	no
chr1	10398155	10398347	5.73759	4.11455	1.39446	no	-	no	no	no	no
chr1	10437459	10437724	7.63399	8.81688	0.865838	no	-	no	no	no	no
chr1	10437470	10437739	0	4.70234	0	no	-	no	no	no	no
chr1	10488227	10488379	3.39797	9.99247	0.340053	no	-	no	no	no	no
chr1	10488243	10488373	0	2.6384	0	no	-	no	no	no	no
chr1	10490331	10490626	6.17894	6.61517	0.934056	yes	APITD1-CORT	no	no	no	no
chr1	10554785	10555399	13.8398	8.81688	1.5697	no	-	no	no	no	yes
chr1	10567578	10567796	0	5.72768	0	no	-	no	no	no	no
chr1	10567584	10567841	11.8456	2.75741	4.29592	no	-	no	no	no	no
chr1	10574470	10574766	3.1049	0	0	no	-	no	no	no	no
chr1	10750575	10750731	4.73824	0	0	no	-	no	no	no	no
chr1	10752521	10752696	0	4.11455	0	no	-	no	no	no	no
chr1	10788436	10788551	3.55368	0	0	no	-	no	no	no	no
chr1	10853456	10853571	2.88651	0	0	no	-	no	no	no	no
chr1	10927165	10927512	0	4.11455	0	no	-	no	no	no	no
chr1	10927232	10927577	10.661	2.75741	3.86632	no	-	no	no	no	no
chr1	11001981	11002398	5.17484	5.87792	0.880386	no	-	no	no	no	no
chr1	11021091	11021409	3.97218	4.41011	0.900699	no	-	no	no	no	no
chr1	11097653	11098183	8.3857	3.36473	2.49224	no	-	no	no	no	no
chr1	11258240	11258355	4.14596	0	0	no	-	no	no	no	no
chr1	11280737	11280886	0	4.70234	0	no	-	no	no	no	no
chr1	11301755	11301953	5.33052	0	0	no	-	no	no	no	no
chr1	11333641	11333781	4.14596	0	0	yes	UBIAD1	no	no	no	no
chr1	11346378	11346495	0	4.11455	0	no	-	no	no	no	no
chr1	11380206	11380475	0	2.64607	0	no	-	no	no	no	no
chr1	11380215	11380456	7.69964	4.11455	1.87132	no	-	no	no	no	no
chr1	11397596	11398043	7.69964	5.87792	1.30993	no	-	no	no	no	no
chr1	11424172	11424347	3.55368	0	0	no	-	no	no	no	no
chr1	11538770	11539078	0	4.11455	0	yes	PTCHD2	no	no	no	no
chr1	11538799	11539020	11.2533	3.52675	3.19085	no	-	no	no	no	no
chr1	11702468	11702760	8.29192	4.85112	1.70928	no	-	no	no	no	no
chr1	11705788	11706051	6.17894	9.99247	0.61836	no	-	no	no	no	no
chr1	11710385	11710753	10.9687	7.05618	1.55449	no	-	no	no	no	yes
chr1	11724152	11724352	4.82985	3.37886	1.42943	yes	FBXO6	no	no	no	no
chr1	11736863	11736980	0	4.70234	0	no	-	no	no	no	no
chr1	11767504	11767669	3.55368	0	0	no	-	no	no	no	no
chr1	11771191	11771402	0	4.70234	0	no	-	no	no	no	no
chr1	11771198	11771477	5.33052	3.16608	1.68363	no	-	no	no	no	no
chr1	11779950	11780247	3.97218	6.60005	0.601841	no	-	no	no	no	no
chr1	11809288	11809576	9.47648	6.46571	1.46565	no	-	yes	no	no	no
chr1	11809327	11809472	0	2.75741	0	no	-	yes	no	no	no
chr1	11840370	11840508	4.73824	0	0	no	-	no	no	no	no
chr1	11845186	11845502	6.62029	6.46571	1.02391	no	-	no	no	no	no
chr1	11898676	11899207	0	3.36473	0	no	-	no	no	no	no
chr1	11898847	11899123	9.23682	4.70234	1.9643	no	-	no	no	no	no
chr1	11925594	11925829	5.9228	0	0	no	-	no	no	no	no
chr1	11953994	11954371	7.06165	3.9691	1.77916	no	-	no	no	no	no
chr1	11967814	11968052	16.5838	3.69376	4.48969	no	-	no	no	no	no
chr1	12027266	12027600	8.29192	2.93503	2.82516	no	-	no	no	no	no
chr1	12027283	12027463	0	4.11455	0	no	-	no	no	no	no
chr1	12091430	12091546	5.33052	0	0	no	-	no	no	no	no
chr1	12123132	12123249	0	7.05351	0	yes	TNFRSF8	no	no	no	no
chr1	12139776	12139908	4.14596	0	0	no	-	no	no	no	no
chr1	12166971	12167098	0	3.52675	0	no	-	no	no	no	no
chr1	12177655	12177770	2.9614	0	0	no	-	no	no	no	no
chr1	12178649	12178936	0	4.85112	0	no	-	no	no	no	no
chr1	12178699	12178946	9.47648	8.31592	1.13956	no	-	no	no	no	no
chr1	12184941	12185225	5.73759	3.39459	1.69022	no	-	no	no	no	no
chr1	12225067	12225231	4.67773	0	0	no	-	no	no	no	no
chr1	12236652	12236837	0	3.37886	0	no	-	no	no	no	no
chr1	12240348	12240465	0	3.40749	0	no	-	no	no	no	no
chr1	12256772	12257113	0	3.16608	0	no	-	no	no	no	no
chr1	12256790	12257115	7.45221	4.70234	1.58479	no	-	no	no	no	no
chr1	12269021	12269249	7.10736	3.52675	2.01527	no	-	no	no	no	yes
chr1	12269301	12269417	4.14596	5.29013	0.783716	no	-	no	no	no	yes
chr1	12289730	12290160	11.8456	4.70234	2.51909	yes	VPS13D	no	no	no	no
chr1	12304678	12304805	2.64812	0	0	no	-	no	no	no	no
chr1	12335526	12335844	7.10736	4.11455	1.72737	no	-	no	no	no	no
chr1	12358078	12358358	4.52282	0	0	no	-	no	no	no	no
chr1	12374482	12374671	4.43111	3.52675	1.25643	no	-	no	no	no	no
chr1	12374531	12374670	0	4.70234	0	no	-	no	no	no	no
chr1	12408273	12408388	3.32333	0	0	no	-	no	no	no	no
chr1	12419298	12419458	0	3.9691	0	no	-	no	no	no	no
chr1	12467473	12467825	4.14596	0	0	no	-	no	no	no	no
chr1	12470228	12470417	2.54848	0	0	no	-	no	no	no	no
chr1	12480482	12480599	0	3.69376	0	no	-	yes	no	no	no
chr1	12482812	12482927	3.5083	0	0	no	-	yes	no	no	no
chr1	12497240	12497357	0	2.93503	0	no	-	no	no	no	no
chr1	12508668	12508785	0	3.51162	0	no	-	no	no	no	no
chr1	12566244	12566361	0	3.2958	0	no	-	no	no	no	no
chr1	12633372	12633505	5.33052	0	0	no	-	no	no	no	no
chr1	12661241	12661449	4.14596	0	0	no	-	no	no	no	no
chr1	12679916	12680147	0	2.64607	0	no	-	no	no	no	yes
chr1	12679926	12680187	10.37	4.11455	2.52032	no	-	no	no	no	yes
chr1	12719004	12719305	5.17484	3.52675	1.46731	no	-	no	no	no	no
chr1	13843840	13844017	3.79488	4.70234	0.807019	no	-	no	no	no	no
chr1	13908422	13908568	2.9614	0	0	no	-	no	no	no	no
chr1	13986957	13987074	0	4.70234	0	no	-	no	no	no	no
chr1	13992236	13992463	8.8842	4.70234	1.88931	no	-	no	no	no	no
chr1	13992249	13992518	0	3.52675	0	no	-	no	no	no	no
chr1	14052477	14052592	4.73824	4.11455	1.15158	no	-	no	no	no	no
chr1	14103373	14103488	4.14596	0	0	no	-	no	no	no	no
chr1	14133843	14133970	4.14596	0	0	no	-	no	no	no	no
chr1	14137806	14138052	0	4.70234	0	no	-	no	no	no	no
chr1	14155396	14155564	3.53082	0	0	no	-	no	no	no	no
chr1	14155714	14155829	3.46381	0	0	no	-	no	no	no	no
chr1	14173704	14173822	3.08947	0	0	no	-	no	no	no	no
chr1	14220078	14220195	0	4.11455	0	no	-	no	no	no	no
chr1	14239845	14239962	0	3.52675	0	no	-	no	no	no	no
chr1	14286989	14287249	0	3.52675	0	no	-	no	no	no	no
chr1	14287017	14287151	5.73759	3.55387	1.61446	no	-	no	no	no	no
chr1	14292396	14292518	4.73824	0	0	no	-	no	no	no	no
chr1	14527517	14527711	3.55368	0	0	no	-	no	no	no	no
chr1	14769325	14769483	3.45666	0	0	no	-	no	no	no	no
chr1	14822374	14822491	0	3.52675	0	no	-	no	no	no	no
chr1	14844327	14844483	0	3.52675	0	no	-	no	no	no	no
chr1	14904288	14904412	0	4.11455	0	no	-	yes	no	no	no
chr1	14932726	14932859	3.55368	0	0	no	-	no	no	no	no
chr1	15058519	15058701	0	4.70234	0	no	-	no	no	no	no
chr1	15058574	15058797	3.1049	2.82883	1.09759	no	-	no	no	no	no
chr1	15105711	15105850	4.41353	0	0	no	-	no	no	no	yes
chr1	15109585	15109702	0	4.11455	0	no	-	no	no	no	no
chr1	15131112	15131425	4.73824	2.7465	1.72519	no	-	no	no	no	no
chr1	15131268	15131450	0	3.52675	0	no	-	no	no	no	no
chr1	15241784	15242197	0	3.52675	0	no	-	no	no	no	no
chr1	15241910	15242114	8.8842	3.43661	2.58516	no	-	no	no	no	no
chr1	15251090	15251226	5.33052	3.52675	1.51145	yes	KAZN	no	no	no	no
chr1	15354074	15354279	5.09695	4.58214	1.11235	no	-	no	no	no	no
chr1	15373023	15373276	6.92762	0	0	no	-	no	no	no	no
chr1	15389031	15389320	6.17894	7.05351	0.876009	no	-	no	no	no	no
chr1	15410384	15410499	3.55368	0	0	no	-	no	no	no	no
chr1	15426808	15427370	10.0688	5.87792	1.71298	no	-	no	no	no	yes
chr1	15454967	15455372	0	4.11455	0	no	-	no	no	no	no
chr1	15454988	15455419	8.8842	3.52809	2.51813	no	-	no	no	no	no
chr1	15478806	15479099	0	3.55387	0	yes	TMEM51-AS1	no	no	no	no
chr1	15478841	15479127	6.17894	3.08708	2.00155	yes	TMEM51-AS1	no	no	no	no
chr1	15480606	15480903	5.82224	2.64607	2.20033	yes	TMEM51	no	no	no	no
chr1	15589436	15589551	3.41957	0	0	no	-	no	no	no	no
chr1	15599094	15599422	7.10736	5.29013	1.34351	no	-	no	no	no	no
chr1	15631214	15631585	0	3.9754	0	no	-	no	no	no	no
chr1	15631353	15631688	5.17484	2.87853	1.79774	no	-	no	no	no	no
chr1	15649977	15650381	17.319	7.10775	2.43664	no	-	no	no	no	no
chr1	15651943	15652104	3.37813	0	0	no	-	no	no	no	no
chr1	15655571	15655777	4.41353	2.75741	1.60061	no	-	no	no	no	no
chr1	15668943	15669058	3.32333	0	0	no	-	no	no	no	no
chr1	15684428	15684611	3.55368	0	0	no	-	no	no	no	no
chr1	15726282	15726419	0	3.43661	0	no	-	no	no	no	no
chr1	15734834	15735012	0	3.52675	0	no	-	no	no	no	no
chr1	15757690	15757921	0	4.58214	0	no	-	no	no	no	no
chr1	15757707	15757923	3.79488	5.29013	0.717351	no	-	no	no	no	no
chr1	15765405	15765520	3.55368	0	0	no	-	no	no	no	no
chr1	15827982	15828397	7.10736	3.52675	2.01527	no	-	no	no	no	no
chr1	15895506	15895629	3.55368	0	0	no	-	no	no	no	no
chr1	15921703	15921909	0	4.70234	0	no	-	yes	no	no	no
chr1	15944216	15944342	0	5.87792	0	yes	DDI2	no	no	no	yes
chr1	15953563	15953711	0	3.52809	0	no	-	no	no	no	no
chr1	15960069	15960186	0	3.08708	0	no	-	yes	no	no	no
chr1	15977074	15977191	0	2.64607	0	no	-	no	no	no	no
chr1	16067966	16068171	0	4.11455	0	no	-	no	no	no	no
chr1	16067975	16068217	7.10736	6.61517	1.0744	no	-	no	no	no	no
chr1	16118572	16118793	4.32235	5.29013	0.817059	no	-	yes	no	no	yes
chr1	16142084	16142434	5.63566	7.9382	0.709942	no	-	no	no	no	no
chr1	16200561	16200678	0	4.41011	0	no	-	no	no	no	no
chr1	16203308	16203427	0	2.75741	0	no	-	no	no	no	no
chr1	16205876	16205991	4.5797	0	0	no	-	no	no	no	no
chr1	16256758	16256877	4.985	0	0	no	-	no	no	no	no
chr1	16265374	16265489	4.43111	0	0	no	-	no	no	no	no
chr1	16294047	16294193	4.12836	0	0	no	-	yes	no	no	no
chr1	16309410	16309624	2.41492	0	0	no	-	no	no	no	no
chr1	16321025	16321142	0	4.00937	0	no	-	yes	no	no	no
chr1	16321123	16321342	14.2147	8.22909	1.72737	no	-	yes	no	no	no
chr1	16335320	16335822	8.29192	2.64607	3.13367	no	-	yes	no	no	yes
chr1	16335554	16335776	0	5.29013	0	no	-	yes	no	no	yes
chr1	16359307	16359693	7.10736	4.70234	1.51145	no	-	no	no	no	yes
chr1	16359396	16359650	0	3.52675	0	no	-	no	no	no	yes
chr1	16382656	16382862	5.51983	3.43661	1.60618	no	-	no	no	no	no
chr1	16400008	16400349	4.61841	6.61517	0.698154	yes	FAM131C	no	no	no	no
chr1	16405409	16405748	9.05497	6.89352	1.31355	no	-	no	no	no	no
chr1	16408918	16409205	4.48486	13.6714	0.328048	no	-	no	no	no	no
chr1	16481283	16481456	3.55368	2.63866	1.34677	no	-	no	no	no	no
chr1	16486723	16486838	4.14596	0	0	no	-	yes	no	no	no
chr1	16514291	16514536	7.57328	5.29214	1.43104	no	-	no	no	no	no
chr1	16514383	16514525	0	2.93896	0	no	-	no	no	no	no
chr1	16570787	16571187	0	3.91337	0	no	-	no	no	no	no
chr1	16570921	16571113	7.69964	4.76788	1.6149	no	-	no	no	no	no
chr1	16678938	16679162	4.85488	0	0	yes	FBXO42	no	no	no	no
chr1	16681100	16681217	0	2.64607	0	no	-	no	no	no	no
chr1	16690003	16690129	2.70987	0	0	no	-	yes	no	no	no
chr1	16694064	16694207	3.58633	0	0	no	-	no	no	no	no
chr1	16719328	16719500	3.55368	0	0	no	-	no	no	no	yes
chr1	16723215	16723332	0	4.70234	0	no	-	no	no	no	no
chr1	16766894	16767214	0	3.43661	0	yes	NECAP2	no	no	no	no
chr1	16766923	16767270	8.29192	7.05351	1.17557	yes	NECAP2	no	no	no	no
chr1	16825494	16825695	5.33052	0	0	no	-	no	no	no	no
chr1	16918378	16918531	2.83164	0	0	no	-	no	no	no	no
chr1	16939751	16939960	2.83164	0	0	yes	NBPF1	no	no	no	no
chr1	16947609	16947805	5.523	3.9691	1.3915	no	-	no	no	no	yes
chr1	16948023	16948158	3.15257	4.48079	0.703575	no	-	no	no	no	yes
chr1	16951451	16951742	12.3579	7.49719	1.64833	no	-	yes	no	no	no
chr1	17026560	17026924	4.85488	3.52809	1.37606	no	-	yes	no	no	no
chr1	17026719	17026872	0	3.08708	0	no	-	yes	no	no	no
chr1	17029526	17029858	0	5.29214	0	no	-	no	no	no	no
chr1	17029703	17030033	5.43666	9.40467	0.578081	no	-	no	no	no	no
chr1	17033890	17034005	3.64096	3.9691	0.917326	no	-	no	no	no	no
chr1	17036287	17036643	14.1446	6.5916	2.14585	no	-	no	no	no	no
chr1	17278217	17278419	0	2.93503	0	no	-	no	no	no	no
chr1	17278252	17278445	7.94435	9.78343	0.812021	no	-	no	no	no	no
chr1	17287137	17287349	8.29192	2.54595	3.25691	no	-	no	no	no	no
chr1	17289999	17290260	3.97218	5.87792	0.67578	no	-	no	no	no	no
chr1	17313572	17313752	0	4.11455	0	no	-	yes	no	no	no
chr1	17313593	17313845	5.9228	8.81688	0.671757	no	-	yes	no	no	no
chr1	17326514	17326629	3.55368	0	0	no	-	yes	no	no	no
chr1	17386169	17386374	4.82985	4.85112	0.995615	no	-	yes	no	no	no
chr1	17386234	17386559	0	3.9691	0	no	-	yes	no	no	no
chr1	17401962	17402168	8.86222	0	0	no	-	no	no	no	no
chr1	17452220	17452570	5.86482	3.52675	1.66295	no	-	no	no	no	yes
chr1	17509753	17509868	3.87722	0	0	no	-	no	no	no	no
chr1	17560175	17560319	4.73824	0	0	no	-	yes	no	no	no
chr1	17563631	17563782	5.33052	5.29013	1.00763	no	-	no	no	no	yes
chr1	17600657	17601041	9.47648	3.52809	2.68601	no	-	yes	no	no	no
chr1	17603247	17603443	5.33052	0	0	no	-	no	no	no	yes
chr1	17662681	17662900	8.3857	7.6413	1.09742	no	-	no	no	no	no
chr1	17732752	17732976	7.50492	8.22909	0.911999	no	-	no	no	no	no
chr1	17746429	17746703	5.17484	9.40467	0.550242	no	-	no	no	no	yes
chr1	17747417	17747532	4.14596	0	0	no	-	no	no	no	no
chr1	17766180	17766391	4.14596	0	0	yes	RCC2	no	no	no	no
chr1	17776633	17776748	4.14596	0	0	no	-	no	no	no	no
chr1	17803961	17804225	4.48486	0	0	no	-	no	no	no	no
chr1	17820778	17821095	5.94644	8.96707	0.663142	no	-	no	no	no	no
chr1	17828820	17829065	8.29192	7.05618	1.17513	no	-	no	no	no	no
chr1	17852664	17852817	3.46381	0	0	no	-	no	no	no	no
chr1	17854154	17854269	3.55368	0	0	no	-	no	no	no	no
chr1	17878384	17878603	3.55368	0	0	no	-	yes	no	no	no
chr1	17933400	17933706	8.27974	3.94201	2.10039	no	-	no	no	no	no
chr1	17956079	17956194	3.58633	0	0	no	-	no	no	no	no
chr1	17980257	17980528	9.47648	4.11455	2.30316	no	-	no	no	no	yes
chr1	17988080	17988339	4.48486	4.11455	1.09	no	-	yes	no	no	no
chr1	18085793	18085908	4.14596	0	0	no	-	no	no	no	no
chr1	18226092	18226207	4.14596	0	0	no	-	no	no	no	no
chr1	18259654	18259772	3.46381	0	0	no	-	yes	no	no	no
chr1	18311131	18311246	2.9614	5.29214	0.559585	no	-	no	no	no	no
chr1	18426967	18427345	4.41353	8.22909	0.536333	no	-	no	no	no	no
chr1	18427078	18427371	0	3.52675	0	no	-	no	no	no	no
chr1	18427488	18427603	2.9614	3.52675	0.839697	no	-	no	no	no	no
chr1	18561416	18561558	3.44989	0	0	no	-	no	no	no	no
chr1	18626373	18626491	5.33052	7.6413	0.697593	no	-	no	no	no	no
chr1	18629369	18629524	3.55368	7.05351	0.503817	no	-	no	no	no	no
chr1	18700514	18700679	4.14596	0	0	no	-	no	no	no	no
chr1	18883001	18883159	3.97218	0	0	no	-	no	no	no	no
chr1	18902115	18902362	6.51508	3.55387	1.83324	no	-	no	no	no	no
chr1	18907999	18908163	4.14596	0	0	no	-	no	no	no	no
chr1	18916113	18916228	3.32333	0	0	no	-	no	no	no	no
chr1	18923788	18924182	0	3.52809	0	no	-	no	no	no	yes
chr1	18923826	18924246	9.47648	3.94201	2.40397	no	-	no	no	no	yes
chr1	19112556	19112671	4.14596	0	0	no	-	no	no	no	no
chr1	19147348	19147621	12.3579	3.9691	3.11352	no	-	no	no	no	no
chr1	19201827	19202000	8.29192	6.33215	1.3095	no	-	no	no	no	yes
chr1	19210315	19210523	4.73824	4.22143	1.12243	no	-	no	no	no	no
chr1	19210621	19210874	6.62029	2.82883	2.34029	no	-	no	no	no	no
chr1	19233397	19233859	5.09695	4.70234	1.08392	no	-	no	no	no	no
chr1	19239504	19239880	12.839	5.29013	2.42698	no	-	yes	no	no	yes
chr1	19245729	19245844	4.14596	0	0	no	-	no	no	no	no
chr1	19301422	19301537	3.87722	0	0	no	-	no	no	no	no
chr1	19422732	19423138	4.73824	3.52809	1.343	no	-	no	no	no	no
chr1	19440098	19440325	2.75991	0	0	no	-	no	no	no	no
chr1	19465162	19465277	4.14596	0	0	no	-	no	no	no	no
chr1	19532225	19532340	4.14531	0	0	no	-	no	no	no	no
chr1	19567831	19568042	7.62524	2.63866	2.88982	no	-	no	no	no	no
chr1	19668006	19668461	6.62029	4.11455	1.60899	no	-	no	no	no	no
chr1	19670729	19671245	6.51508	8.97055	0.726274	no	-	no	no	no	no
chr1	19717742	19718064	0	3.08708	0	no	-	no	no	no	no
chr1	19744137	19744277	2.64812	0	0	no	-	no	no	no	no
chr1	19755075	19755192	0	6.46571	0	no	-	no	no	no	no
chr1	19755921	19756036	3.19381	0	0	no	-	no	no	no	no
chr1	19777733	19777867	0	3.94201	0	no	-	no	no	no	no
chr1	19794840	19794955	4.43111	0	0	no	-	no	no	no	no
chr1	19796765	19796882	0	3.2958	0	no	-	no	no	no	no
chr1	19814212	19814365	0	4.11455	0	no	-	no	no	no	yes
chr1	19814330	19814578	5.29623	4.11455	1.2872	no	-	no	no	no	yes
chr1	19908571	19908686	5.33052	3.9691	1.343	no	-	no	no	no	no
chr1	19908778	19909005	7.10736	5.29013	1.34351	no	-	yes	no	no	no
chr1	19908811	19909053	0	5.87792	0	no	-	yes	no	no	no
chr1	19977854	19977993	4.85488	0	0	no	-	no	no	no	no
chr1	19980251	19980500	0	4.11455	0	no	-	no	no	no	no
chr1	19980280	19980497	7.45221	4.11455	1.81118	no	-	no	no	no	no
chr1	19986427	19986589	7.69964	3.9691	1.9399	no	-	no	no	no	no
chr1	19988241	19988572	8.29192	4.74911	1.74599	no	-	no	no	no	no
chr1	19996712	19996827	4.14596	0	0	no	-	no	no	no	no
chr1	20031092	20031350	4.08222	3.10209	1.31596	no	-	no	no	no	no
chr1	20042032	20042339	6.51508	3.08708	2.11043	no	-	no	no	no	no
chr1	20088689	20089109	8.8842	3.30366	2.6892	no	-	no	no	no	no
chr1	20126028	20126152	4.43111	0	0	yes	TMCO4	no	no	no	no
chr1	20137750	20137988	7.69964	8.22909	0.935661	no	-	no	no	no	no
chr1	20198812	20198927	4.14596	0	0	no	-	yes	no	no	no
chr1	20208655	20208827	7.06165	5.87792	1.20139	yes	OTUD3	no	no	no	no
chr1	20217704	20217819	3.69729	0	0	no	-	no	no	no	no
chr1	20230894	20231022	4.59897	0	0	no	-	no	no	no	no
chr1	20244499	20244837	8.8842	5.29013	1.67939	no	-	no	no	no	no
chr1	20244507	20244783	0	3.55387	0	no	-	no	no	no	no
chr1	20301294	20301648	4.85488	5.51482	0.880333	no	-	no	no	no	no
chr1	20366651	20366791	3.55368	0	0	no	-	no	no	no	no
chr1	20427433	20427799	0	3.94201	0	no	-	no	no	no	no
chr1	20427484	20427783	6.95702	4.22143	1.64802	no	-	no	no	no	no
chr1	20478861	20479145	4.41353	3.08708	1.42968	no	-	no	no	no	no
chr1	20521660	20521947	2.88157	0	0	no	-	no	no	no	no
chr1	20539343	20539556	4.85488	5.87792	0.825952	no	-	no	no	no	yes
chr1	20543223	20543407	5.63566	3.52675	1.59798	no	-	yes	no	no	no
chr1	20656363	20656509	0	2.82883	0	no	-	no	no	no	no
chr1	20656502	20656637	3.97218	2.94595	1.34835	no	-	yes	no	no	no
chr1	20688450	20688692	5.9228	4.3944	1.34781	no	-	no	no	no	no
chr1	20700748	20700920	4.73824	0	0	no	-	no	no	no	no
chr1	20702612	20702727	4.14596	0	0	no	-	no	no	no	no
chr1	20703452	20703639	4.85488	2.93896	1.6519	no	-	no	no	no	no
chr1	20724267	20724382	3.55368	0	0	no	-	no	no	no	no
chr1	20820343	20820610	7.503	7.6413	0.981901	no	-	no	no	no	no
chr1	20820459	20820602	0	3.52809	0	no	-	no	no	no	no
chr1	20837941	20838145	3.72611	0	0	no	-	no	no	no	no
chr1	20848868	20849207	4.32235	0	0	no	-	yes	no	no	no
chr1	20901827	20902049	6.51508	4.40254	1.47985	no	-	no	no	no	yes
chr1	20959678	20959952	0	2.75741	0	yes	PINK1	no	no	no	no
chr1	20959719	20960050	12.4379	4.70234	2.64504	yes	PINK1	no	no	no	no
chr1	20966771	20966953	3.1217	4.58214	0.681276	no	-	no	no	no	no
chr1	21022886	21023292	10.646	2.75741	3.86088	no	-	no	no	no	no
chr1	21022912	21023258	0	4.11455	0	no	-	no	no	no	no
chr1	21023374	21023620	4.85488	3.30366	1.46955	no	-	yes	no	no	no
chr1	21049678	21049889	0	5.29214	0	no	-	yes	no	no	no
chr1	21098467	21098584	0	3.52675	0	no	-	no	no	no	no
chr1	21125022	21125174	0	3.39312	0	no	-	no	no	no	no
chr1	21248345	21248460	3.35051	0	0	no	-	no	no	no	no
chr1	21260435	21260550	3.08947	0	0	no	-	no	no	no	no
chr1	21263034	21263188	3.19381	0	0	no	-	no	no	no	no
chr1	21308569	21308715	4.05826	0	0	no	-	no	no	no	no
chr1	21429136	21429253	0	4.11455	0	no	-	no	no	no	no
chr1	21439774	21439889	3.62715	0	0	no	-	no	no	no	no
chr1	21521688	21521914	3.1148	0	0	no	-	no	no	no	no
chr1	21543454	21543693	7.69964	4.13611	1.86157	no	-	yes	no	no	no
chr1	21543454	21543638	0	3.9691	0	no	-	yes	no	no	no
chr1	21544513	21544628	3.53082	5.29013	0.667435	no	-	no	no	no	no
chr1	21558493	21558682	4.41353	3.08708	1.42968	no	-	no	no	no	no
chr1	21558499	21558756	0	4.11455	0	no	-	no	no	no	no
chr1	21571714	21571860	3.87722	3.4242	1.1323	no	-	yes	no	no	no
chr1	21581705	21582007	6.38761	3.95623	1.61457	no	-	no	no	no	yes
chr1	21596717	21596928	4.13987	2.93896	1.40862	no	-	no	no	no	no
chr1	21622350	21622706	3.97392	0	0	no	-	yes	no	no	no
chr1	21661322	21661440	2.75991	4.3944	0.628052	no	-	yes	no	no	no
chr1	21695051	21695266	8.65952	5.29013	1.63692	no	-	no	no	no	no
chr1	21695077	21695264	0	3.30366	0	no	-	no	no	no	no
chr1	21697109	21697311	6.51508	7.91519	0.823111	no	-	no	no	no	no
chr1	21835530	21835814	0	4.11455	0	yes	ALPL	no	no	no	no
chr1	21835614	21835765	5.9228	4.41011	1.34301	yes	ALPL	no	no	no	no
chr1	21900653	21900865	0	3.52675	0	no	-	no	no	no	no
chr1	21922032	21922307	5.9228	7.10775	0.833288	no	-	yes	no	no	no
chr1	21922123	21922348	0	4.11455	0	no	-	yes	no	no	no
chr1	21985666	21985885	6.89978	6.35923	1.085	no	-	yes	no	no	no
chr1	21991970	21992158	5.33052	0	0	no	-	no	no	no	no
chr1	22028301	22028416	3.32333	0	0	no	-	no	no	no	no
chr1	22108270	22108402	0	4.88367	0	no	-	no	no	no	yes
chr1	22192296	22192452	2.9614	0	0	no	-	yes	no	no	no
chr1	22208736	22208853	0	4.22143	0	no	-	no	no	no	no
chr1	22290226	22290341	2.88651	7.10775	0.406107	no	-	no	no	no	no
chr1	22290509	22290847	8.65952	4.11455	2.10461	no	-	no	no	no	no
chr1	22290580	22290726	0	3.08708	0	no	-	no	no	no	no
chr1	22345812	22346016	6.51508	4.58214	1.42184	no	-	no	no	no	no
chr1	22432411	22432605	0	3.52675	0	no	-	no	no	no	no
chr1	22435301	22435418	0	2.94595	0	no	-	no	no	no	no
chr1	22446332	22446449	0	4.3944	0	no	-	no	no	no	no
chr1	22454027	22454151	0	3.52675	0	no	-	no	no	no	no
chr1	22458163	22458280	0	4.70234	0	no	-	no	no	no	no
chr1	22458424	22458719	9.47648	6.20417	1.52744	no	-	no	no	no	no
chr1	22602427	22602688	10.0688	0	0	no	-	no	no	no	no
chr1	22643788	22644007	5.9228	0	0	no	-	no	no	no	no
chr1	22743093	22743518	16.5838	3.52809	4.70052	no	-	no	no	no	yes
chr1	22743161	22743388	0	5.87792	0	no	-	no	no	no	yes
chr1	22746979	22747216	3.46381	6.46571	0.53572	no	-	no	no	no	no
chr1	22963688	22963803	4.73824	0	0	no	-	no	no	no	no
chr1	22968641	22968814	6.90762	4.24756	1.62626	no	-	no	no	no	yes
chr1	22992443	22992558	3.55368	0	0	no	-	no	no	no	no
chr1	23000679	23000886	5.51983	4.85112	1.13785	no	-	no	no	no	no
chr1	23030926	23031245	9.70976	4.13611	2.34756	no	-	no	no	no	no
chr1	23043463	23043660	2.75991	4.11455	0.670768	no	-	no	no	no	no
chr1	23076170	23076333	0	2.75741	0	no	-	no	no	no	no
chr1	23130566	23130681	4.14596	0	0	no	-	no	no	no	no
chr1	23188601	23188800	7.10736	5.26743	1.3493	no	-	no	no	no	no
chr1	23188659	23189020	0	3.30366	0	no	-	no	no	no	no
chr1	23215794	23215984	5.33052	5.29764	1.00621	no	-	no	no	no	no
chr1	23256957	23257199	8.19732	3.44676	2.37827	no	-	no	no	no	yes
chr1	23290805	23291103	4.82985	9.9476	0.485529	no	-	no	no	no	no
chr1	23302922	23303204	11.2533	7.47578	1.5053	no	-	no	no	no	yes
chr1	23303270	23303404	5.9228	3.52809	1.67876	no	-	no	no	no	yes
chr1	23381552	23381699	3.14478	0	0	no	-	no	no	no	no
chr1	23411539	23411654	3.55368	0	0	no	-	no	no	no	no
chr1	23425297	23425460	0	3.41496	0	no	-	no	no	no	no
chr1	23425339	23425524	6.03981	3.52675	1.71257	no	-	no	no	no	no
chr1	23461453	23461602	4.14596	0	0	no	-	no	no	no	no
chr1	23511393	23511579	3.79488	0	0	no	-	no	no	no	no
chr1	23543182	23543569	5.33052	10.5803	0.503817	no	-	no	no	no	no
chr1	23641959	23642115	2.64812	0	0	no	-	no	no	no	no
chr1	23695517	23695697	0	3.08708	0	yes	C1orf213	no	no	no	no
chr1	23730489	23730796	4.08222	4.2687	0.956315	no	-	no	no	no	no
chr1	23730507	23730716	0	3.4242	0	no	-	no	no	no	no
chr1	23810610	23810821	5.24001	0	0	yes	ASAP3	no	no	no	no
chr1	23823596	23823828	4.53062	3.52675	1.28464	no	-	yes	no	no	no
chr1	23823615	23823936	0	2.93896	0	no	-	yes	no	no	no
chr1	23854539	23854680	3.08947	0	0	no	-	no	no	no	no
chr1	23857968	23858086	4.14596	0	0	no	-	no	no	no	no
chr1	23866377	23866621	9.97	4.70234	2.12022	no	-	no	no	no	no
chr1	23871220	23871491	8.8842	4.48631	1.98029	no	-	no	no	no	no
chr1	23921483	23921598	2.64812	0	0	no	-	no	no	no	no
chr1	23961461	23961740	4.48486	4.48079	1.00091	no	-	no	no	no	no
chr1	23964011	23964166	5.86482	7.60851	0.770824	no	-	no	no	no	no
chr1	23984288	23984524	6.14799	3.95864	1.55306	no	-	no	no	no	no
chr1	24018117	24018286	7.90094	7.6902	1.0274	yes	RPL11	no	no	no	no
chr1	24045098	24045267	4.09866	0	0	no	-	no	no	no	no
chr1	24072041	24072182	2.64812	0	0	no	-	no	no	no	no
chr1	24077911	24078181	6.38761	6.33215	1.00876	no	-	yes	no	no	no
chr1	24098687	24098921	4.82985	4.48079	1.0779	no	-	no	no	no	no
chr1	24125260	24125375	4.14596	0	0	no	-	no	no	no	no
chr1	24136203	24136555	9.04912	3.16608	2.85815	no	-	no	no	no	no
chr1	24137322	24137507	6.91991	3.9754	1.74068	no	-	no	no	no	no
chr1	24181207	24181360	5.77301	4.90352	1.17732	no	-	no	no	no	no
chr1	24181208	24181325	0	4.11455	0	no	-	no	no	no	no
chr1	24194801	24195065	5.79133	2.75741	2.10028	yes	FUCA1	no	no	no	no
chr1	24209840	24209955	4.14596	0	0	no	-	no	no	no	no
chr1	24243334	24243571	3.79488	3.52675	1.07603	no	-	yes	no	no	yes
chr1	24305033	24305150	0	3.9754	0	no	-	no	no	no	no
chr1	24341776	24341891	3.87722	0	0	no	-	no	no	no	no
chr1	24354578	24354847	0	3.52809	0	no	-	no	no	no	no
chr1	24354672	24354787	4.14596	5.87006	0.706289	no	-	no	no	no	no
chr1	24397174	24397662	4.41353	4.70234	0.938582	no	-	no	no	no	no
chr1	24397445	24397661	0	3.52675	0	no	-	no	no	no	no
chr1	24476899	24477203	6.1955	3.52675	1.75672	no	-	yes	no	no	no
chr1	24476993	24477186	0	4.11455	0	no	-	yes	no	no	no
chr1	24485045	24485160	4.14596	0	0	no	-	yes	no	no	no
chr1	24499542	24499711	4.04111	0	0	no	-	no	no	no	no
chr1	24510046	24510181	3.55368	0	0	no	-	no	no	no	no
chr1	24525767	24526145	8.29192	9.40467	0.881681	no	-	no	no	no	no
chr1	24528471	24528726	3.53082	4.11455	0.85813	no	-	no	no	no	no
chr1	24635415	24635547	0	3.52675	0	no	-	yes	no	no	no
chr1	24711812	24711934	0	5.26743	0	no	-	no	no	no	no
chr1	24716720	24716924	0	5.29764	0	no	-	no	no	no	no
chr1	24717739	24718081	10.6047	3.52675	3.00693	no	-	no	no	no	no
chr1	24717809	24718086	0	3.44676	0	no	-	no	no	no	no
chr1	24718831	24719163	5.38598	7.05351	0.763589	no	-	no	no	no	no
chr1	24741961	24742126	5.12333	7.49719	0.683367	yes	NIPAL3	no	no	no	no
chr1	24797397	24797558	0	3.2958	0	no	-	no	no	no	no
chr1	24819332	24819449	0	3.94201	0	no	-	no	no	no	no
chr1	24853739	24853946	0	3.52675	0	no	-	no	no	no	no
chr1	24853780	24853962	7.503	2.93896	2.55294	no	-	no	no	no	no
chr1	24867841	24867977	3.58633	9.99247	0.358903	no	-	yes	no	no	no
chr1	24868489	24868834	4.14596	5.29214	0.783418	no	-	no	no	no	no
chr1	24874748	24874885	3.08947	0	0	no	-	no	no	no	no
chr1	24913792	24914007	5.51983	5.38089	1.02582	no	-	no	no	no	no
chr1	24913827	24913987	0	10.5803	0	no	-	no	no	no	no
chr1	24961822	24962069	5.85486	3.52675	1.66013	no	-	yes	no	no	no
chr1	24969179	24969294	2.85036	0	0	no	-	no	no	no	no
chr1	25015092	25015294	10.5925	9.99247	1.06005	no	-	no	no	no	no
chr1	25071433	25071599	3.87722	0	0	yes	CLIC4	no	no	no	no
chr1	25095745	25095860	3.18141	0	0	no	-	no	no	no	no
chr1	25108535	25108650	3.55368	0	0	no	-	yes	no	no	no
chr1	25174357	25174499	0	3.52675	0	no	-	no	no	no	no
chr1	25174415	25174760	9.97	7.6413	1.30475	no	-	no	no	no	no
chr1	25176234	25176454	5.33052	7.9382	0.671502	no	-	yes	no	no	yes
chr1	25176336	25176453	0	4.41248	0	no	-	yes	no	no	yes
chr1	25224564	25224914	0	4.48631	0	no	-	no	no	no	no
chr1	25224631	25224961	7.10736	8.22909	0.863687	no	-	no	no	no	no
chr1	25235823	25236328	11.0338	6.17416	1.7871	no	-	no	no	no	no
chr1	25258708	25259133	8.8842	8.22909	1.07961	no	-	yes	no	no	yes
chr1	25279128	25279300	5.33052	0	0	no	-	yes	no	no	no
chr1	25288812	25289117	4.73824	0	0	no	-	no	no	no	no
chr1	25363698	25363996	0	3.95864	0	no	-	no	no	no	no
chr1	25363783	25363976	6.64666	4.06157	1.63648	no	-	no	no	no	no
chr1	25364377	25364492	4.985	8.82023	0.565178	no	-	no	no	no	no
chr1	25427996	25428204	6.47122	3.08708	2.09623	no	-	no	no	no	no
chr1	25444016	25444155	2.75991	0	0	no	-	no	no	no	no
chr1	25475270	25475542	6.91991	2.26306	3.05777	no	-	no	no	no	no
chr1	25566414	25566602	0	4.48079	0	no	-	no	no	no	no
chr1	25566419	25566729	5.28507	6.28269	0.841211	no	-	no	no	no	no
chr1	25571613	25571728	3.09723	0	0	no	-	no	no	no	no
chr1	25739112	25739228	5.33052	0	0	no	-	no	no	no	no
chr1	25757638	25757753	4.14596	0	0	yes	TMEM57	yes	no	no	no
chr1	25764612	25764729	0	3.16608	0	no	-	no	no	no	no
chr1	25773323	25773484	0	3.9754	0	no	-	no	no	no	no
chr1	25814051	25814345	3.97218	3.46622	1.14597	no	-	no	no	no	no
chr1	25814110	25814344	0	4.90352	0	no	-	no	no	no	no
chr1	25831501	25831618	0	2.39878	0	no	-	no	no	no	yes
chr1	25832119	25832258	0	3.52675	0	no	-	no	no	no	yes
chr1	25846712	25846876	3.72611	2.75741	1.35131	no	-	no	no	no	no
chr1	25847016	25847269	6.66033	8.66214	0.768901	no	-	no	no	no	no
chr1	25847065	25847247	0	4.11455	0	no	-	no	no	no	no
chr1	25850177	25850304	5.33052	3.79144	1.40594	no	-	no	no	no	no
chr1	25899357	25899691	7.10736	5.87792	1.20916	no	-	no	no	no	no
chr1	25899410	25899662	0	3.52675	0	no	-	no	no	no	no
chr1	25935204	25935398	4.76577	0	0	no	-	no	no	no	no
chr1	25942641	25942756	3.24623	0	0	no	-	yes	no	no	no
chr1	25945645	25945884	5.47231	8.81688	0.620663	no	-	no	no	no	no
chr1	26019226	26019342	3.87722	0	0	no	-	no	no	no	no
chr1	26123338	26123608	7.93475	6.60005	1.20223	no	-	no	no	no	no
chr1	26123378	26123563	0	4.11455	0	no	-	no	no	no	no
chr1	26124597	26124831	6.51508	5.15491	1.26386	no	-	no	no	no	no
chr1	26137329	26137604	8.29192	6.17416	1.343	no	-	yes	no	no	no
chr1	26137425	26137610	0	3.52675	0	no	-	yes	no	no	no
chr1	26221880	26222228	14.807	5.29013	2.79899	no	-	no	no	no	no
chr1	26318765	26318964	3.08947	0	0	no	-	no	no	no	no
chr1	26324573	26324915	0	2.93896	0	yes	PAFAH2	no	no	no	no
chr1	26324631	26324915	11.8456	7.9382	1.49223	yes	PAFAH2	no	no	no	no
chr1	26362341	26362722	11.546	5.87792	1.96431	no	-	no	no	no	no
chr1	26431527	26431720	6.1955	3.52675	1.75672	no	-	no	no	no	no
chr1	26471617	26471860	3.95047	3.11171	1.26955	no	-	no	no	no	no
chr1	26488504	26488630	4.14596	5.87792	0.705345	no	-	no	no	no	no
chr1	26490696	26490894	4.73824	4.70234	1.00763	no	-	yes	no	no	yes
chr1	26496191	26496499	10.661	13.5192	0.788584	yes	ZNF593	no	no	no	no
chr1	26527001	26527116	4.14596	0	0	no	-	no	no	no	no
chr1	26560299	26561232	4.48486	8.01875	0.559297	yes	CEP85	no	no	no	no
chr1	26564141	26564256	2.6615	0	0	no	-	no	no	no	no
chr1	26597534	26597649	3.55368	0	0	no	-	yes	no	no	no
chr1	26597722	26597837	3.55368	0	0	no	-	yes	no	no	no
chr1	26602072	26602464	0	5.07696	0	no	-	no	no	no	no
chr1	26602103	26602218	3.72611	3.16608	1.17688	no	-	no	no	no	no
chr1	26606036	26606370	3.77019	0	0	yes	SH3BGRL3	no	no	no	no
chr1	26626763	26626887	3.55368	0	0	no	-	no	no	no	no
chr1	26648091	26648310	9.47648	6.46571	1.46565	no	-	no	no	no	no
chr1	26690380	26690592	9.81413	6.30044	1.55769	no	-	no	no	no	yes
chr1	26690650	26690765	4.61841	2.64607	1.74538	no	-	no	no	no	yes
chr1	26717953	26718308	9.47648	10.986	0.862596	no	-	yes	no	no	no
chr1	26722850	26723029	3.53082	7.6902	0.459132	no	-	no	no	no	no
chr1	26743518	26743823	10.661	5.22184	2.04163	no	-	no	no	no	no
chr1	26796903	26797151	4.85488	8.22909	0.589966	no	-	no	no	no	no
chr1	26796907	26797107	0	4.00937	0	no	-	no	no	no	no
chr1	26797214	26797390	3.55368	3.33681	1.06499	no	-	no	no	no	no
chr1	26797568	26797736	3.08947	3.08708	1.00077	no	-	yes	no	no	no
chr1	26826674	26826939	4.41353	3.90917	1.12902	no	-	no	no	no	no
chr1	26857661	26857916	5.29623	0	0	no	-	no	no	no	no
chr1	26864567	26864806	7.06165	3.52675	2.00231	no	-	no	no	no	no
chr1	26865317	26865432	3.89301	0	0	no	-	no	no	no	no
chr1	26924064	26924303	4.41353	3.69376	1.19486	no	-	no	no	no	no
chr1	26924072	26924383	0	4.22143	0	no	-	no	no	no	no
chr1	26928934	26929286	6.3382	5.29214	1.19766	no	-	no	no	no	no
chr1	26941409	26941555	0	4.11455	0	no	-	no	no	no	no
chr1	26946655	26947074	6.17894	4.13611	1.4939	no	-	no	no	no	yes
chr1	26946734	26947003	0	3.52675	0	no	-	no	no	no	yes
chr1	27004200	27004343	0	3.46622	0	no	-	no	no	no	no
chr1	27077081	27077222	4.61841	0	0	no	-	no	no	no	no
chr1	27115696	27115990	6.62029	2.82883	2.34029	no	-	no	no	no	no
chr1	27115700	27115921	0	2.75741	0	no	-	no	no	no	no
chr1	27136596	27136751	5.29623	4.3944	1.20522	no	-	no	no	no	yes
chr1	27147262	27147487	9.47648	4.07908	2.32319	no	-	no	no	no	no
chr1	27152855	27153205	7.503	8.37921	0.89543	yes	ZDHHC18	no	no	no	no
chr1	27179697	27179911	8.29192	7.05618	1.17513	no	-	no	no	no	yes
chr1	27189315	27189433	4.73824	0	0	yes	SFN	no	no	no	no
chr1	27204582	27204737	2.83164	0	0	no	-	no	no	no	no
chr1	27213649	27214048	5.29623	0	0	no	-	no	no	no	no
chr1	27269885	27270000	4.14596	0	0	no	-	no	no	no	no
chr1	27293399	27293676	6.17894	4.70234	1.31401	no	-	no	no	no	no
chr1	27293519	27293708	0	8.81688	0	no	-	no	no	no	no
chr1	27324199	27324433	8.19732	3.52809	2.32344	no	-	yes	no	no	yes
chr1	27371053	27371289	5.51983	0	0	no	-	no	no	no	yes
chr1	27372521	27372759	10.2467	0	0	no	-	yes	no	no	no
chr1	27423850	27424278	0	5.15491	0	no	-	yes	no	no	no
chr1	27423906	27424229	8.3857	3.52675	2.37774	no	-	yes	no	no	no
chr1	27429261	27429465	10.661	4.11455	2.59106	no	-	no	no	no	no
chr1	27465869	27466084	3.97218	0	0	no	-	no	no	no	no
chr1	27481588	27481828	0	3.43661	0	no	-	no	no	no	no
chr1	27481596	27481808	10.1511	3.55387	2.85636	no	-	no	no	no	no
chr1	27521257	27521448	4.14596	0	0	no	-	no	no	no	no
chr1	27524460	27524758	9.47648	4.58214	2.06813	no	-	no	no	no	yes
chr1	27611120	27611476	0	3.52675	0	no	-	no	no	no	no
chr1	27611158	27611468	5.09695	6.46571	0.788305	no	-	no	no	no	no
chr1	27623288	27623456	7.10736	4.11455	1.72737	no	-	no	no	no	no
chr1	27627327	27627549	17.7684	3.8451	4.62105	no	-	no	no	no	no
chr1	27659154	27659659	5.63566	5.29013	1.06532	no	-	yes	no	no	no
chr1	27659238	27659557	0	13.5192	0	no	-	yes	no	no	no
chr1	27684053	27684331	5.77301	4.70234	1.22769	no	-	no	no	no	no
chr1	27684456	27684592	4.73824	4.11455	1.15158	no	-	no	no	no	no
chr1	27692955	27693218	7.10736	4.70234	1.51145	yes	MAP3K6	no	no	no	no
chr1	27714932	27715321	0	3.52809	0	no	-	no	no	no	no
chr1	27714982	27715136	3.53082	3.52675	1.00115	no	-	no	no	no	no
chr1	27718748	27719078	7.14866	3.52675	2.02698	yes	GPR3	no	no	no	no
chr1	27719336	27719506	3.1049	0	0	yes	GPR3	no	no	no	no
chr1	27719560	27719681	4.61841	0	0	no	-	no	no	no	no
chr1	27721910	27722184	9.04912	5.29013	1.71057	no	-	no	no	no	no
chr1	27721947	27722279	0	3.52809	0	no	-	no	no	no	no
chr1	27728908	27729024	5.33052	4.11455	1.29553	no	-	no	no	no	no
chr1	27740257	27740372	4.73824	0	0	no	-	no	no	no	no
chr1	27743065	27743241	6.51508	5.29013	1.23155	no	-	no	no	no	no
chr1	27883335	27883557	7.50492	0	0	no	-	no	no	no	no
chr1	27888658	27888775	4.14596	0	0	no	-	no	no	no	no
chr1	27894986	27895542	7.94435	3.9691	2.00155	no	-	no	no	no	no
chr1	27895005	27895504	0	2.64607	0	no	-	no	no	no	no
chr1	27932854	27933239	5.29623	5.8595	0.903871	no	-	no	no	no	yes
chr1	27935107	27935386	8.18603	4.11455	1.98953	no	-	no	no	no	no
chr1	27942997	27943138	3.87722	0	0	no	-	no	no	no	no
chr1	27970433	27970725	3.97218	3.43661	1.15584	no	-	no	no	no	no
chr1	27979017	27979132	3.55368	0	0	no	-	no	no	no	no
chr1	27989047	27989189	3.37813	0	0	no	-	no	no	no	no
chr1	27989826	27989972	5.60711	9.40467	0.596205	no	-	no	no	no	no
chr1	27994197	27994314	0	3.08708	0	no	-	no	no	no	yes
chr1	27995730	27995891	3.79488	4.85112	0.782269	no	-	no	no	no	no
chr1	27995748	27995931	0	3.90917	0	no	-	no	no	no	no
chr1	28052187	28052340	3.79488	0	0	yes	FAM76A	no	no	no	no
chr1	28087113	28087263	3.08947	0	0	no	-	no	no	no	no
chr1	28184482	28184889	3.79488	3.55387	1.06782	no	-	no	no	no	no
chr1	28184573	28184919	0	3.52675	0	no	-	no	no	no	no
chr1	28266964	28267266	0	3.69376	0	no	-	no	no	no	no
chr1	28266975	28267120	6.51508	7.6902	0.847193	no	-	no	no	no	no
chr1	28417839	28418012	6.41951	2.64607	2.42605	no	-	no	no	no	no
chr1	28439702	28439817	3.33686	0	0	no	-	no	no	no	no
chr1	28535479	28535616	0	3.8451	0	no	-	no	no	no	no
chr1	28535534	28535657	3.79488	5.51482	0.688124	no	-	no	no	no	no
chr1	28567778	28567895	0	4.3944	0	no	-	no	no	no	no
chr1	28575059	28575304	8.3857	3.52809	2.37684	no	-	no	no	no	no
chr1	28575073	28575287	0	4.07908	0	no	-	no	no	no	no
chr1	28649047	28649211	3.08947	0	0	no	-	no	no	no	no
chr1	28686198	28686411	3.68113	7.38751	0.498291	no	-	no	no	no	no
chr1	28694754	28694930	4.71813	2.87853	1.63908	no	-	no	no	no	no
chr1	28844490	28844850	5.51983	8.22909	0.67077	yes	RCC1	no	no	no	no
chr1	28907765	28907908	3.33604	0	0	yes	SNORA16A	no	no	no	no
chr1	28929467	28929598	5.33052	7.6413	0.697593	no	-	no	no	no	no
chr1	29063109	29063344	6.89825	4.70234	1.46698	yes	YTHDF2	no	no	no	no
chr1	29111605	29111904	9.47648	4.70234	2.01527	no	-	no	no	no	no
chr1	29203824	29204034	7.68499	7.05351	1.08953	no	-	yes	no	no	no
chr1	29208507	29208824	7.36813	3.52675	2.08921	no	-	no	no	no	no
chr1	29208628	29208793	0	6.17416	0	no	-	yes	no	no	no
chr1	29290202	29290346	4.73824	0	0	no	-	no	no	no	no
chr1	29370993	29371110	0	3.52675	0	no	-	no	no	no	no
chr1	29447803	29447953	0	4.11455	0	no	-	no	no	no	yes
chr1	29447824	29448013	5.33052	7.6413	0.697593	no	-	no	no	no	yes
chr1	29448191	29448362	5.33052	4.11455	1.29553	no	-	no	no	no	yes
chr1	29508412	29508703	0	3.55387	0	yes	SRSF4	no	no	no	no
chr1	29508431	29508714	7.36813	5.29013	1.39281	yes	SRSF4	no	no	no	no
chr1	29524213	29524328	3.87722	3.52675	1.09937	no	-	no	no	no	no
chr1	29529379	29529649	15.3993	3.52675	4.36642	no	-	yes	no	no	no
chr1	29557495	29557636	0	4.11455	0	yes	MECR	no	no	no	yes
chr1	29557558	29557684	3.46381	7.9382	0.436347	yes	MECR	no	no	no	yes
chr1	29562774	29563130	9.47648	4.70234	2.01527	yes	PTPRU	no	no	no	no
chr1	29572399	29572650	5.73759	0	0	no	-	no	no	no	no
chr1	29658772	29658952	6.51508	0	0	no	-	no	no	no	no
chr1	29667548	29667693	8.29192	3.79144	2.18701	no	-	no	no	no	no
chr1	29706044	29706297	6.51508	0	0	no	-	no	no	no	no
chr1	30136549	30136664	2.94883	0	0	no	-	no	no	no	no
chr1	30140454	30140569	4.73824	0	0	no	-	no	no	no	no
chr1	30170996	30171111	4.14596	0	0	no	-	no	no	no	no
chr1	30176407	30176528	0	4.11455	0	no	-	no	no	no	no
chr1	30186863	30186982	0	4.70234	0	no	-	no	no	no	no
chr1	30214991	30215106	3.55368	0	0	no	-	no	no	no	no
chr1	30265922	30266150	3.79488	7.6413	0.496628	no	-	no	no	no	no
chr1	30266097	30266236	0	3.52675	0	no	-	no	no	no	no
chr1	30322023	30322180	4.14596	0	0	no	-	no	no	no	no
chr1	30385357	30385472	3.87722	0	0	no	-	no	no	no	no
chr1	30422130	30422255	4.14596	0	0	no	-	no	no	no	no
chr1	30524541	30524656	4.14596	0	0	no	-	no	no	no	no
chr1	30740308	30740423	2.9614	0	0	no	-	no	no	no	no
chr1	30795928	30796085	0	4.11455	0	no	-	no	no	no	no
chr1	30853237	30853511	0	3.52675	0	no	-	no	no	no	no
chr1	30853308	30853512	13.0302	7.6413	1.70523	no	-	no	no	no	no
chr1	31114809	31114924	4.14596	0	0	no	-	yes	no	no	no
chr1	31181052	31181205	7.69964	2.86384	2.68857	no	-	no	no	no	no
chr1	31181123	31181271	0	4.11455	0	no	-	yes	no	no	no
chr1	31188187	31188325	4.41353	0	0	no	-	no	no	no	no
chr1	31192104	31192584	9.23682	5.29013	1.74605	yes	MATN1-AS1	yes	no	no	no
chr1	31200578	31200693	3.55368	0	0	no	-	no	no	no	no
chr1	31252467	31252795	10.661	9.49823	1.12242	no	-	no	no	no	no
chr1	31255198	31255455	7.69964	19.3971	0.396947	no	-	no	no	no	yes
chr1	31255878	31256039	2.41492	3.19131	0.756717	no	-	no	no	no	yes
chr1	31274651	31274853	4.82985	3.39459	1.42281	no	-	no	no	no	no
chr1	31293226	31293341	3.42043	0	0	no	-	yes	no	no	no
chr1	31304174	31304317	4.14596	0	0	no	-	no	no	no	no
chr1	31384269	31384630	0	4.11455	0	no	-	no	no	no	no
chr1	31384278	31384601	8.65952	3.43661	2.51979	no	-	no	no	no	no
chr1	31402315	31402453	4.09866	0	0	no	-	no	no	no	no
chr1	31450026	31450143	0	3.43661	0	no	-	no	no	no	no
chr1	31628213	31628408	3.97218	0	0	no	-	yes	no	no	no
chr1	31635574	31635803	0	3.81385	0	no	-	yes	no	no	no
chr1	31635624	31635854	8.29192	3.52675	2.35115	no	-	yes	no	no	no
chr1	31654369	31654707	7.69964	3.33681	2.30749	no	-	no	no	no	no
chr1	31656831	31657173	4.85488	3.43661	1.41269	no	-	yes	no	no	no
chr1	31658497	31658754	2.83164	0	0	no	-	no	no	no	no
chr1	31713420	31713548	0	3.52675	0	no	-	no	no	no	no
chr1	31807973	31808198	0	3.52675	0	no	-	no	no	no	no
chr1	31811990	31812105	3.55368	0	0	no	-	no	no	no	no
chr1	31867443	31867787	0	3.55387	0	no	-	no	no	no	no
chr1	31867459	31867927	7.75444	3.52675	2.19875	no	-	no	no	no	no
chr1	31869453	31869709	3.44989	2.82883	1.21955	no	-	no	no	no	no
chr1	31884996	31885165	4.14596	0	0	no	-	yes	no	no	no
chr1	31894264	31894660	11.8456	3.52675	3.35879	no	-	no	no	no	no
chr1	31895661	31895889	4.82985	10.5803	0.456496	no	-	no	no	no	no
chr1	31922157	31922272	4.14596	0	0	no	-	no	no	no	no
chr1	32014518	32015009	5.86482	4.85112	1.20896	no	-	no	no	no	no
chr1	32014520	32014933	0	3.52809	0	no	-	no	no	no	no
chr1	32029798	32029980	4.79071	3.52675	1.35839	no	-	no	no	no	no
chr1	32036258	32036373	4.14596	0	0	no	-	no	no	no	no
chr1	32053476	32053731	2.83164	4.13611	0.684614	no	-	no	no	no	no
chr1	32059695	32060001	11.2533	7.49719	1.50101	no	-	no	no	no	no
chr1	32083830	32084244	3.39797	3.52675	0.963485	no	-	no	no	no	no
chr1	32083842	32084134	0	3.52675	0	no	-	no	no	no	no
chr1	32098801	32098983	0	4.70234	0	no	-	no	no	no	no
chr1	32098882	32099082	3.1049	4.11455	0.754615	no	-	no	no	no	no
chr1	32129423	32129699	10.0688	2.93503	3.43055	no	-	no	no	no	no
chr1	32179937	32180171	4.73824	8.22909	0.575791	no	-	no	no	no	no
chr1	32180033	32180298	0	3.52675	0	no	-	yes	no	no	no
chr1	32181341	32181622	6.20981	4.11455	1.50923	no	-	no	no	no	no
chr1	32211249	32211448	0	4.11455	0	no	-	no	no	no	yes
chr1	32211262	32211582	7.10736	5.51482	1.28877	no	-	no	no	no	yes
chr1	32228245	32228636	4.73824	0	0	no	-	no	no	no	yes
chr1	32232304	32232457	0	3.52675	0	no	-	no	no	no	no
chr1	32254811	32255149	5.29623	4.11455	1.2872	no	-	no	no	no	no
chr1	32254903	32255123	0	3.52675	0	no	-	no	no	no	no
chr1	32281592	32281859	5.29623	4.3944	1.20522	yes	SPOCD1	no	no	no	yes
chr1	32403858	32404073	0	3.52675	0	yes	PTP4A2	no	no	no	no
chr1	32403948	32404142	5.9228	4.11455	1.43948	yes	PTP4A2	no	no	no	no
chr1	32404251	32404441	3.55368	4.13611	0.859184	no	-	yes	no	no	no
chr1	32429782	32430020	0	3.79144	0	no	-	no	no	no	no
chr1	32429791	32430033	14.2147	5.09189	2.79164	no	-	no	no	no	no
chr1	32439747	32439884	3.55368	0	0	no	-	no	no	no	no
chr1	32468990	32469399	4.85488	0	0	no	-	no	no	no	no
chr1	32478594	32478711	0	3.52809	0	no	-	no	no	no	no
chr1	32517773	32517913	0	3.08708	0	no	-	no	no	no	no
chr1	32527957	32528079	0	4.09689	0	no	-	no	no	no	no
chr1	32529482	32529607	2.64812	0	0	no	-	no	no	no	no
chr1	32575016	32575338	0	4.70234	0	no	-	no	no	no	no
chr1	32575027	32575199	9.47648	3.96036	2.39283	no	-	no	no	no	no
chr1	32593370	32593485	3.55368	0	0	no	-	no	no	no	no
chr1	32594528	32594643	3.32333	0	0	no	-	no	no	no	no
chr1	32650522	32650705	0	4.11455	0	no	-	no	no	no	no
chr1	32681250	32681616	0	2.86384	0	no	-	no	no	no	no
chr1	32681270	32681598	9.47648	4.70234	2.01527	no	-	no	no	no	no
chr1	32705963	32706358	3.97218	0	0	no	-	no	no	no	no
chr1	32713872	32714042	3.97218	4.56927	0.869325	no	-	yes	no	no	no
chr1	32800685	32801067	0	3.08708	0	no	-	no	no	no	no
chr1	32800734	32801175	8.29192	4.70234	1.76336	no	-	yes	no	no	no
chr1	32816746	32816978	5.9257	4.48079	1.32247	no	-	no	no	no	no
chr1	32838070	32838221	4.04111	0	0	no	-	no	no	no	no
chr1	32866458	32866807	0	2.86384	0	no	-	no	no	no	yes
chr1	32866519	32866709	8.88855	3.8451	2.31166	no	-	no	no	no	yes
chr1	32936626	32936841	6.92762	4.80901	1.44055	no	-	no	no	no	no
chr1	32985990	32986331	0	4.70234	0	no	-	no	no	no	no
chr1	32986038	32986281	8.51681	7.6413	1.11458	no	-	no	no	no	no
chr1	33076386	33076501	3.55368	0	0	no	-	yes	no	no	no
chr1	33085851	33085966	4.14596	0	0	no	-	no	no	no	no
chr1	33117303	33117459	4.14596	0	0	no	-	no	no	no	no
chr1	33120956	33121102	4.04111	0	0	no	-	no	no	no	no
chr1	33177728	33178172	18.953	8.81688	2.14962	no	-	no	no	no	no
chr1	33207080	33207361	4.76577	4.3944	1.08451	yes	KIAA1522	no	no	no	no
chr1	33215374	33215489	4.14596	0	0	no	-	no	no	no	no
chr1	33221360	33221475	3.53082	0	0	no	-	yes	no	no	no
chr1	33238576	33238940	5.38012	3.1912	1.68592	no	-	no	no	no	no
chr1	33294031	33294146	3.87722	0	0	no	-	no	no	no	no
chr1	33338231	33338447	4.73824	6.61517	0.716269	yes	FNDC5	no	no	no	no
chr1	33338258	33338523	0	3.52675	0	yes	FNDC5	no	no	no	no
chr1	33342167	33342505	9.97	5.87792	1.69618	no	-	no	no	no	no
chr1	33352114	33352507	11.2533	7.44598	1.51133	yes	HPCA	yes	no	no	yes
chr1	33352242	33352546	0	4.85112	0	yes	HPCA	yes	no	no	yes
chr1	33358556	33358679	5.33052	0	0	no	-	no	no	no	no
chr1	33399099	33399214	2.96285	0	0	no	-	no	no	no	no
chr1	33452652	33452769	0	3.52675	0	no	-	no	no	no	no
chr1	33471971	33472088	0	3.33681	0	no	-	no	no	no	no
chr1	33516280	33516448	4.73824	6.09236	0.777735	no	-	no	no	no	no
chr1	33516326	33516443	0	3.43661	0	no	-	no	no	no	no
chr1	33520772	33521097	8.8842	3.52809	2.51813	no	-	no	no	no	no
chr1	33546446	33546561	4.14596	0	0	yes	ADC	no	no	no	no
chr1	33552057	33552181	0	3.52675	0	no	-	no	no	no	no
chr1	33552068	33552521	3.79488	4.74911	0.799072	no	-	no	no	no	no
chr1	33560668	33561023	10.1344	6.40304	1.58275	no	-	no	no	no	no
chr1	33577675	33577790	5.21777	0	0	no	-	no	no	no	no
chr1	33592839	33593141	15.3993	2.75741	5.58469	no	-	no	no	no	yes
chr1	33592869	33593094	0	3.52675	0	no	-	no	no	no	yes
chr1	33594347	33594462	3.55368	0	0	no	-	no	no	no	no
chr1	33613695	33613860	4.14596	0	0	no	-	no	no	no	no
chr1	33686746	33686861	3.55368	0	0	no	-	no	no	no	no
chr1	33760905	33761473	7.17266	7.05351	1.01689	no	-	no	no	no	yes
chr1	33764341	33764628	8.3857	7.6413	1.09742	no	-	yes	no	no	no
chr1	33779403	33779563	4.14596	0	0	no	-	yes	no	no	no
chr1	33811092	33811242	4.14596	0	0	no	-	no	no	no	no
chr1	33833446	33833958	0	3.52675	0	no	-	no	no	no	no
chr1	33833463	33833638	7.06165	4.11455	1.71626	no	-	no	no	no	no
chr1	33921509	33921717	4.48486	3.52675	1.27167	no	-	no	no	no	no
chr1	33936106	33936370	6.62029	3.08708	2.14452	no	-	no	no	no	no
chr1	33966233	33966374	3.55368	0	0	no	-	no	no	no	no
chr1	34039015	34039229	0	3.52675	0	no	-	no	no	no	no
chr1	34060522	34060639	0	4.11455	0	no	-	no	no	no	no
chr1	34078510	34078808	0	2.93503	0	no	-	no	no	no	no
chr1	34078571	34078767	11.2533	3.43661	3.27454	no	-	no	no	no	no
chr1	34098603	34099040	0	4.11455	0	no	-	no	no	no	no
chr1	34098610	34098908	10.0047	3.08708	3.24083	no	-	no	no	no	no
chr1	34134697	34134892	0	5.87792	0	no	-	no	no	no	no
chr1	34437406	34437599	2.64812	0	0	no	-	no	no	no	no
chr1	34552294	34552462	4.73824	0	0	no	-	no	no	no	no
chr1	34808513	34808628	2.9614	0	0	no	-	no	no	no	no
chr1	34925892	34926098	3.97218	0	0	no	-	yes	no	no	no
chr1	34978579	34978697	0	4.11455	0	no	-	no	no	no	no
chr1	35014951	35015139	0	4.3944	0	no	-	no	no	no	no
chr1	35063598	35063839	5.33052	0	0	no	-	no	no	no	no
chr1	35147119	35147387	0	4.11455	0	no	-	no	no	no	no
chr1	35147144	35147353	5.73759	2.93896	1.95225	no	-	no	no	no	no
chr1	35208248	35208824	6.22961	6.20417	1.0041	no	-	no	no	no	no
chr1	35245536	35245657	5.33052	0	0	no	-	no	no	no	no
chr1	35252079	35252413	7.06165	8.81688	0.800924	no	-	no	no	no	no
chr1	35318269	35318577	15.006	6.46571	2.32086	no	-	no	no	no	no
chr1	35325310	35325706	0	3.16608	0	yes	SMIM12	no	no	no	no
chr1	35325458	35325668	3.79488	6.87321	0.552126	yes	SMIM12	no	no	no	no
chr1	35331809	35332279	12.4379	4.70234	2.64504	no	-	no	no	no	no
chr1	35384803	35384920	0	3.52675	0	no	-	yes	no	no	no
chr1	35560424	35560539	3.08947	0	0	no	-	no	no	no	no
chr1	35667675	35668057	0	4.70234	0	no	-	no	no	no	no
chr1	35667814	35668092	7.10736	3.9691	1.79067	no	-	no	no	no	no
chr1	35764323	35764481	3.46381	0	0	no	-	no	no	no	no
chr1	35810965	35811209	5.73759	4.55902	1.25851	no	-	no	no	no	no
chr1	35916643	35916954	4.85488	12.9314	0.375433	no	-	no	no	no	no
chr1	35916694	35916945	0	4.70234	0	no	-	no	no	no	no
chr1	35965432	35965547	3.58633	0	0	no	-	no	no	no	no
chr1	35972844	35972959	4.43111	0	0	no	-	no	no	no	no
chr1	36010694	36010937	0	3.43661	0	no	-	yes	no	no	no
chr1	36010728	36010918	5.77301	4.11455	1.40307	no	-	yes	no	no	no
chr1	36019504	36019643	3.86156	0	0	no	-	no	no	no	no
chr1	36030238	36030555	3.1148	5.29013	0.588795	no	-	no	no	no	no
chr1	36034489	36034892	5.73759	2.75741	2.08079	no	-	no	no	no	no
chr1	36179800	36179917	0	3.8451	0	no	-	no	no	no	no
chr1	36181100	36181437	0	3.52675	0	no	-	yes	no	no	no
chr1	36181137	36181403	7.75444	4.41011	1.75833	no	-	yes	no	no	no
chr1	36192497	36192812	8.29192	4.11455	2.01527	no	-	no	no	no	no
chr1	36240303	36240573	8.8842	4.11455	2.15922	no	-	no	no	no	no
chr1	36298986	36299101	3.53082	0	0	no	-	no	no	no	no
chr1	36323504	36323775	4.79071	4.69557	1.02026	no	-	no	no	no	no
chr1	36348523	36348848	10.5925	2.41273	4.39024	yes	AGO1	no	no	no	no
chr1	36352043	36352158	4.14596	0	0	no	-	no	no	no	no
chr1	36446186	36446303	0	4.00937	0	no	-	no	no	no	no
chr1	36454920	36455037	0	3.1912	0	no	-	no	no	no	no
chr1	36532779	36532894	4.43111	0	0	no	-	no	no	no	no
chr1	36554176	36554576	6.62029	3.10209	2.13414	yes	ADPRHL2	no	no	no	no
chr1	36554216	36554492	0	3.52675	0	yes	ADPRHL2	no	no	no	no
chr1	36565214	36565944	8.29192	3.52675	2.35115	yes	COL8A2	no	no	no	no
chr1	36582716	36582929	2.64812	0	0	no	-	yes	no	no	no
chr1	36600462	36600594	4.73824	3.99232	1.18684	no	-	no	no	no	no
chr1	36615202	36615472	10.37	4.2687	2.42931	yes	TRAPPC3	no	no	no	no
chr1	36626713	36627083	5.12333	4.70234	1.08953	no	-	no	no	no	no
chr1	36628223	36628338	3.55368	0	0	no	-	no	no	no	no
chr1	36653856	36654025	7.68499	2.73556	2.80929	no	-	yes	no	no	no
chr1	36660884	36660999	3.55368	0	0	no	-	no	no	no	no
chr1	36748768	36748891	0	3.52809	0	no	-	no	no	no	no
chr1	36751172	36751436	6.64666	13.7852	0.482159	no	-	no	no	no	no
chr1	36751214	36751469	0	4.11455	0	no	-	no	no	no	no
chr1	36808315	36808703	7.06165	0	0	no	-	no	no	no	no
chr1	36813006	36813149	4.14596	0	0	no	-	no	no	no	no
chr1	36834587	36834922	6.35032	8.40189	0.75582	no	-	no	no	no	no
chr1	36834607	36835012	0	6.40304	0	no	-	no	no	no	no
chr1	36877962	36878077	4.14596	0	0	no	-	no	no	no	no
chr1	36886378	36886690	5.73759	3.53593	1.62265	no	-	no	no	no	no
chr1	36911979	36912217	9.47648	3.08979	3.06703	no	-	no	no	no	no
chr1	36981960	36982252	10.661	6.9192	1.54079	no	-	no	no	no	no
chr1	36981986	36982282	0	4.00937	0	no	-	no	no	no	no
chr1	37019473	37019656	4.14596	5.26888	0.786877	no	-	no	no	no	yes
chr1	37041639	37041952	3.53082	6.40538	0.551227	no	-	yes	no	no	no
chr1	37052054	37052219	4.14596	0	0	no	-	no	no	no	no
chr1	37116134	37116441	0	2.75741	0	no	-	no	no	no	no
chr1	37116176	37116339	5.17484	3.26335	1.58574	no	-	no	no	no	no
chr1	37169394	37169700	4.61841	0	0	no	-	no	no	no	no
chr1	37292717	37292837	0	4.11455	0	no	-	no	no	no	no
chr1	37631999	37632129	0	3.52675	0	no	-	no	no	no	no
chr1	37642974	37643137	4.14596	0	0	no	-	no	no	no	no
chr1	37655609	37655747	0	3.08708	0	no	-	no	no	no	no
chr1	37663727	37663879	4.11061	0	0	no	-	no	no	no	no
chr1	37689487	37689604	0	4.70234	0	no	-	no	no	no	no
chr1	37731262	37731422	3.55368	0	0	no	-	no	no	no	no
chr1	37759099	37759216	0	3.43661	0	no	-	yes	no	no	no
chr1	37789386	37789639	0	3.08708	0	no	-	no	no	no	no
chr1	37789394	37789647	8.8842	2.66581	3.33265	no	-	no	no	no	no
chr1	37899749	37900182	0	4.11455	0	no	-	no	no	no	no
chr1	37899897	37900183	8.8842	5.73745	1.54846	no	-	no	no	no	no
chr1	37920475	37920857	0	4.70234	0	no	-	no	no	no	no
chr1	37920527	37920817	10.0688	9.57825	1.05121	no	-	no	no	no	no
chr1	37953029	37953439	5.86482	6.87135	0.853518	no	-	no	no	no	yes
chr1	37953060	37953405	0	2.93896	0	no	-	no	no	no	yes
chr1	37980176	37980617	7.69964	2.58941	2.97351	yes	MEAF6	no	no	no	no
chr1	37980226	37980587	0	4.70234	0	yes	MEAF6	no	no	no	no
chr1	37988918	37989210	3.87722	0	0	no	-	no	no	no	no
chr1	38027382	38027781	5.9228	5.4844	1.07994	no	-	no	no	no	no
chr1	38068717	38069006	5.77301	2.74188	2.10549	no	-	no	no	no	yes
chr1	38142204	38142478	5.33052	2.34504	2.2731	no	-	no	no	no	no
chr1	38148103	38148327	9.49113	2.47469	3.83528	no	-	no	no	no	no
chr1	38155472	38155638	3.1049	0	0	no	-	no	no	no	no
chr1	38157959	38158189	8.86222	5.94536	1.49061	yes	CDCA8	no	no	no	no
chr1	38274511	38274694	5.01845	0	0	no	-	no	no	no	no
chr1	38275019	38275134	3.08947	0	0	no	-	no	no	no	no
chr1	38276740	38277012	8.3857	0	0	no	-	no	no	no	no
chr1	38323883	38323998	3.29659	0	0	no	-	no	no	no	no
chr1	38325777	38325996	6.91991	2.29392	3.01663	no	-	no	yes	yes	no
chr1	38341537	38341745	2.9614	0	0	no	-	no	no	no	no
chr1	38356175	38356360	3.68406	4.80612	0.766535	no	-	no	no	no	no
chr1	38385122	38385254	4.73824	0	0	no	-	yes	no	no	no
chr1	38440701	38440908	3.08947	0	0	no	-	no	no	no	no
chr1	38455729	38456040	18.3607	8.56623	2.14338	yes	SF3A3	no	no	no	no
chr1	38484668	38484815	5.9228	1.93355	3.06317	no	-	no	no	no	no
chr1	38486268	38486383	2.41492	0	0	no	-	no	no	no	no
chr1	38492354	38492528	5.33052	2.99017	1.78268	no	-	no	no	no	yes
chr1	38669607	38669724	0	4.11455	0	no	-	no	no	no	no
chr1	38912012	38912127	4.14596	0	0	no	-	no	no	no	no
chr1	38955520	38955657	4.73824	4.30137	1.10157	no	-	no	no	no	no
chr1	38955570	38955826	0	3.52675	0	no	-	no	no	no	no
chr1	39031569	39031684	3.55368	0	0	no	-	no	no	no	no
chr1	39052842	39052986	0	2.75741	0	no	-	no	no	no	no
chr1	39052868	39052987	3.08947	2.78359	1.10989	no	-	no	no	no	no
chr1	39059743	39059869	4.25841	0	0	no	-	no	no	no	no
chr1	39074102	39074219	4.73824	0	0	no	-	no	no	no	no
chr1	39153719	39153834	4.73824	0	0	no	-	no	no	no	no
chr1	39179470	39179585	4.14596	0	0	no	-	no	no	no	no
chr1	39248996	39249113	0	4.11455	0	no	-	no	no	no	no
chr1	39269275	39269392	0	4.11455	0	no	-	no	no	no	no
chr1	39283851	39284176	9.05971	9.16837	0.988148	no	-	no	no	no	no
chr1	39283952	39284130	0	3.52675	0	no	-	no	no	no	no
chr1	39300888	39301310	0	2.41273	0	no	-	no	no	no	no
chr1	39300929	39301330	5.65353	5.83169	0.96945	no	-	no	no	no	no
chr1	39355497	39355612	3.87722	0	0	no	-	no	no	no	no
chr1	39395641	39395767	4.14596	0	0	no	-	no	no	no	no
chr1	39464052	39464167	4.14596	0	0	no	-	no	no	no	no
chr1	39558134	39558295	7.69964	2.09548	3.6744	no	-	no	no	no	no
chr1	39564352	39564467	3.46381	5.30183	0.653323	no	-	no	no	no	no
chr1	39568291	39568481	0	3.52675	0	no	-	no	no	no	yes
chr1	39568343	39568459	4.85488	2.42064	2.00562	no	-	no	no	no	yes
chr1	39649459	39649695	3.45132	4.00982	0.860717	no	-	no	no	no	no
chr1	39649460	39649630	0	3.99232	0	no	-	no	no	no	no
chr1	39658056	39658450	10.6877	0	0	no	-	yes	no	no	yes
chr1	39659475	39659590	3.69729	0	0	no	-	no	no	no	no
chr1	39724309	39724455	3.53082	0	0	no	-	no	no	no	no
chr1	39724515	39724716	5.29623	0	0	no	-	no	no	no	no
chr1	39787719	39787834	2.64092	0	0	no	-	no	no	no	no
chr1	39844063	39844191	4.45487	0	0	no	-	no	no	no	no
chr1	39876689	39876823	5.32301	0	0	yes	KIAA0754	no	no	no	no
chr1	39973028	39973145	0	4.70234	0	no	-	no	no	no	no
chr1	39990289	39990404	3.1049	0	0	no	-	yes	no	no	yes
chr1	39991051	39991168	0	3.05653	0	no	-	no	no	no	yes
chr1	40004913	40005287	0	2.73556	0	no	-	no	no	no	yes
chr1	40004972	40005398	8.86911	1.76361	5.02895	no	-	no	no	no	yes
chr1	40028439	40028566	2.82608	0	0	no	-	no	no	no	no
chr1	40042337	40042817	16.818	7.42839	2.26402	no	-	no	no	no	no
chr1	40056681	40056797	3.06089	0	0	no	-	no	no	no	no
chr1	40061155	40061339	0	4.10018	0	no	-	yes	no	no	no
chr1	40071736	40072131	10.0057	1.9657	5.09013	no	-	no	no	no	no
chr1	40071775	40072133	0	3.22648	0	no	-	no	no	no	no
chr1	40075398	40075670	5.57934	2.16001	2.58302	no	-	no	no	no	no
chr1	40093583	40093701	0	3.53593	0	no	-	no	no	no	no
chr1	40105377	40105858	8.28704	3.01992	2.74413	yes	HEYL	no	no	no	yes
chr1	40105435	40106001	0	3.08979	0	yes	HEYL	no	no	no	yes
chr1	40119190	40119560	5.52699	2.256	2.44991	no	-	no	no	no	yes
chr1	40123693	40124165	9.56615	2.04751	4.67209	no	-	no	no	no	no
chr1	40138042	40138875	10.4226	4.14066	2.51713	no	-	no	no	no	no
chr1	40144923	40145055	0	3.26335	0	no	-	no	no	no	no
chr1	40167500	40168003	0	3.05282	0	no	-	yes	no	no	no
chr1	40167502	40167929	11.3466	1.87233	6.06017	no	-	yes	no	no	no
chr1	40185687	40186006	6.65637	5.54993	1.19936	no	-	no	no	no	no
chr1	40185738	40186002	0	2.95696	0	no	-	no	no	no	no
chr1	40248771	40248941	2.66115	0	0	no	-	no	no	no	no
chr1	40264809	40265095	0	2.66581	0	no	-	no	no	no	no
chr1	40264943	40265154	7.20392	3.89659	1.84878	no	-	no	no	no	no
chr1	40265433	40265785	13.3409	2.27726	5.85831	no	-	no	no	no	no
chr1	40268340	40268524	2.88157	0	0	no	-	yes	no	no	no
chr1	40271487	40271603	3.03148	0	0	no	-	no	no	no	no
chr1	40282438	40282757	9.12496	7.36147	1.23956	no	-	no	no	no	no
chr1	40283164	40283431	3.00185	8.52449	0.352144	no	-	no	no	no	no
chr1	40284269	40284404	2.85302	0	0	no	-	yes	no	no	no
chr1	40367338	40367496	3.17117	1.82323	1.73931	yes	MYCL1	no	yes	yes	no
chr1	40367717	40368321	6.37811	2.24414	2.84212	yes	MYCL1	no	yes	no	no
chr1	40367723	40368394	0	3.21352	0	yes	MYCL1	no	yes	no	no
chr1	40371323	40371537	0	2.74188	0	no	-	no	no	no	no
chr1	40383396	40383517	2.76323	3.06263	0.902241	no	-	no	no	no	yes
chr1	40383600	40383740	3.24533	8.73138	0.371686	no	-	no	no	no	yes
chr1	40383604	40383741	0	2.34504	0	no	-	no	no	no	yes
chr1	40384812	40384937	2.48965	3.31662	0.750659	no	-	yes	no	no	yes
chr1	40384986	40385575	6.53656	7.74292	0.844198	no	-	yes	no	no	yes
chr1	40424238	40424411	0	5.94536	0	no	-	no	no	no	yes
chr1	40439087	40439644	0	1.91697	0	no	-	no	no	no	no
chr1	40439092	40439615	10.6956	3.62284	2.95226	no	-	no	no	no	no
chr1	40447179	40447326	1.97733	0	0	no	-	no	no	no	no
chr1	40497947	40498438	8.05412	4.11857	1.95556	no	-	no	no	no	yes
chr1	40497999	40498445	0	1.95348	0	no	-	no	no	no	yes
chr1	40499797	40499980	3.57174	0	0	no	-	no	no	no	yes
chr1	40504923	40505137	1.64313	4.78912	0.343096	no	-	no	no	no	yes
chr1	40524965	40525204	2.16928	0	0	no	-	no	no	no	yes
chr1	40544177	40544620	5.8257	2.3242	2.50654	no	-	no	no	no	yes
chr1	40544181	40544678	0	1.87726	0	no	-	no	no	no	yes
chr1	40552544	40552659	2.23643	0	0	no	-	no	no	no	yes
chr1	40562935	40563077	2.53126	2.49867	1.01304	yes	PPT1	no	no	no	yes
chr1	40609531	40610072	8.48119	2.3867	3.55352	no	-	yes	no	no	yes
chr1	40609654	40610087	0	2.10734	0	no	-	yes	no	no	yes
chr1	40617794	40617953	2.41033	0	0	no	-	no	no	no	yes
chr1	40618693	40619094	4.60662	7.94161	0.580061	no	-	no	no	no	yes
chr1	40627455	40627639	0	3.98353	0	yes	RLF	no	no	no	yes
chr1	40627495	40627780	3.06149	12.535	0.244235	yes	RLF	no	no	no	yes
chr1	40648660	40649005	3.68565	6.98705	0.527497	no	-	no	no	no	yes
chr1	40648663	40649111	0	2.6032	0	no	-	no	no	no	yes
chr1	40663355	40663700	3.22793	3.76371	0.857646	no	-	no	no	no	yes
chr1	40771113	40771412	2.55976	3.37932	0.757478	no	-	no	no	no	yes
chr1	40771144	40771428	0	2.78359	0	no	-	no	no	no	yes
chr1	40776960	40777075	2.38113	3.0719	0.775133	no	-	no	no	no	yes
chr1	40780941	40781497	8.31934	3.53979	2.35024	no	-	no	no	no	yes
chr1	40803064	40803197	2.21486	0	0	no	-	yes	no	no	yes
chr1	40804369	40804819	0	2.06372	0	no	-	no	no	no	yes
chr1	40804372	40804853	10.1184	2.82883	3.57687	no	-	no	no	no	yes
chr1	40839090	40839269	1.8531	0	0	yes	SMAP2	no	no	no	no
chr1	40870497	40870868	7.26398	3.11078	2.3351	no	-	no	no	no	yes
chr1	40904054	40904516	5.56608	14.7125	0.378324	no	-	no	no	no	yes
chr1	40904105	40904491	0	2.44898	0	no	-	no	no	no	yes
chr1	40916328	40916452	0	2.3602	0	yes	ZFP69B	no	no	no	yes
chr1	40998352	40998861	0	2.09548	0	no	-	no	no	no	no
chr1	40998371	40998951	5.80739	3.70766	1.56632	no	-	no	no	no	no
chr1	41057767	41058291	0	2.42064	0	no	-	no	no	no	no
chr1	41057803	41058235	5.3882	2.39878	2.24623	no	-	no	no	no	no
chr1	41077868	41078353	0	2.36112	0	no	-	no	no	no	no
chr1	41077876	41078342	7.28884	8.27768	0.880541	no	-	no	no	no	no
chr1	41086529	41086720	2.66273	0	0	no	-	no	no	no	no
chr1	41090753	41091122	6.64076	5.32926	1.24609	no	-	no	no	no	no
chr1	41096209	41096340	2.30732	3.28538	0.702299	no	-	no	no	no	no
chr1	41096353	41096525	0	1.79531	0	no	-	no	no	no	no
chr1	41115720	41116109	3.73418	4.41476	0.84584	no	-	yes	no	no	no
chr1	41117367	41117581	2.47779	0	0	no	-	no	no	no	no
chr1	41118963	41119083	2.58203	0	0	no	-	no	no	no	no
chr1	41129789	41130046	0	2.02199	0	no	-	yes	no	no	no
chr1	41130647	41130779	0	2.32354	0	no	-	no	no	no	no
chr1	41131313	41131890	0	1.76361	0	yes	RIMS3	no	no	no	no
chr1	41131473	41131979	6.51687	2.8672	2.2729	yes	RIMS3	no	no	no	no
chr1	41134437	41135153	9.51682	3.11008	3.05999	no	-	no	no	no	no
chr1	41146840	41146975	2.39089	0	0	no	-	no	no	no	no
chr1	41154008	41154347	0	2.25466	0	no	-	no	no	no	no
chr1	41154136	41154293	2.38493	2.91416	0.818394	no	-	no	no	no	no
chr1	41220849	41221218	2.87003	3.17781	0.903147	no	-	no	no	no	no
chr1	41220860	41221153	0	2.16001	0	no	-	no	no	no	no
chr1	41225392	41225541	2.28548	2.75923	0.828304	no	-	no	no	no	no
chr1	41235461	41235782	3.22793	3.33157	0.968892	no	-	no	no	no	no
chr1	41235489	41235840	0	2.04751	0	no	-	no	no	no	no
chr1	41236548	41236704	2.19226	0	0	no	-	no	no	no	no
chr1	41239617	41240427	0	1.87233	0	no	-	yes	no	no	no
chr1	41239661	41240258	6.47961	3.19161	2.0302	no	-	yes	no	no	no
chr1	41248372	41248523	2.99318	0	0	no	-	no	no	no	no
chr1	41259112	41259245	2.34571	0	0	no	-	no	no	no	no
chr1	41283433	41283732	3.68409	0	0	no	-	no	no	no	no
chr1	41286060	41286495	5.81763	10.2029	0.570193	no	-	no	no	no	no
chr1	41286180	41286467	0	2.45313	0	no	-	no	no	no	no
chr1	41289321	41289436	2.67919	0	0	no	-	no	no	no	no
chr1	41300968	41301092	2.79383	0	0	no	-	no	no	no	no
chr1	41306146	41306491	0	2.27726	0	no	-	no	no	no	no
chr1	41306354	41306492	2.38232	2.62415	0.907844	no	-	no	no	no	no
chr1	41306896	41307064	2.67906	0	0	no	-	no	no	no	no
chr1	41314021	41314154	2.33685	9.3637	0.249565	no	-	no	no	no	no
chr1	41314213	41314646	0	2.4898	0	no	-	no	no	no	no
chr1	41314225	41314685	9.00597	2.56797	3.50704	no	-	no	no	no	no
chr1	41315549	41316149	7.83126	9.56532	0.818714	no	-	no	no	no	no
chr1	41321215	41321694	6.79303	8.82953	0.769354	no	-	no	no	no	no
chr1	41326120	41326256	2.23116	0	0	no	-	no	yes	yes	no
chr1	41326533	41326653	0	1.82323	0	no	-	yes	yes	yes	no
chr1	41328187	41328442	0	2.24414	0	no	-	no	yes	no	no
chr1	41328242	41328612	3.6853	2.99316	1.23124	no	-	no	yes	no	no
chr1	41374023	41374140	3.0193	0	0	no	-	no	no	no	no
chr1	41414568	41415135	8.24668	2.32214	3.55133	no	-	no	no	no	no
chr1	41417806	41418047	3.36824	4.17669	0.806438	no	-	no	no	no	no
chr1	41418123	41418555	11.786	2.98286	3.95125	no	-	yes	no	no	no
chr1	41418621	41418779	3.96058	3.78909	1.04526	no	-	yes	no	no	no
chr1	41444731	41445083	4.79438	2.63866	1.81698	yes	CTPS1	yes	no	no	no
chr1	41444874	41445205	0	3.62284	0	yes	CTPS1	no	no	no	no
chr1	41469486	41469786	4.12334	3.0698	1.34319	no	-	no	yes	no	no
chr1	41488955	41489193	0	3.25118	0	no	-	no	no	no	no
chr1	41488986	41489101	3.58956	2.8342	1.26652	no	-	no	no	no	no
chr1	41500858	41500980	2.90825	0	0	no	-	no	no	no	no
chr1	41588819	41588997	2.59251	5.53423	0.46845	no	-	no	no	no	no
chr1	41588890	41589125	0	2.71265	0	no	-	no	no	no	no
chr1	41699465	41699629	0	2.75923	0	no	-	no	no	no	yes
chr1	41705947	41706085	0	2.49867	0	no	-	yes	no	no	no
chr1	41728736	41728947	6.45777	3.35829	1.92293	no	-	no	no	no	no
chr1	41728770	41728920	0	2.3867	0	no	-	no	no	no	no
chr1	41733823	41734212	11.4542	2.91901	3.924	no	-	no	no	no	no
chr1	41748352	41748758	11.9308	5.27731	2.26077	no	-	no	no	no	no
chr1	41779215	41779917	10.2515	3.11841	3.28742	no	-	no	no	no	no
chr1	41788623	41788859	4.9869	5.51719	0.903884	no	-	no	no	no	no
chr1	41797003	41797146	2.86576	7.43621	0.385379	no	-	no	no	no	no
chr1	41826747	41827036	0	3.0719	0	no	-	no	no	no	no
chr1	41826761	41827025	4.35942	9.11536	0.47825	no	-	no	no	no	no
chr1	41875783	41875900	0	3.40796	0	no	-	no	no	no	no
chr1	41882716	41883108	0	2.82883	0	no	-	no	no	no	yes
chr1	41882730	41883233	10.2446	2.62848	3.89752	no	-	no	no	no	yes
chr1	41898351	41898900	0	3.11078	0	no	-	no	no	no	no
chr1	41898353	41898901	16.0165	5.43652	2.94609	no	-	no	no	no	no
chr1	41936547	41936677	3.1148	0	0	no	-	no	no	no	no
chr1	41949978	41950267	3.1217	2.80243	1.11393	yes	EDN2	no	no	no	no
chr1	41950081	41950414	0	3.70766	0	yes	EDN2	no	no	no	no
chr1	41957922	41958312	11.6068	5.65278	2.05329	no	-	no	no	no	no
chr1	41960914	41961738	6.07807	6.65658	0.913092	no	-	no	no	no	no
chr1	41972713	41972830	0	5.32926	0	no	-	no	no	no	no
chr1	41978906	41979370	0	3.28538	0	no	-	no	no	no	no
chr1	41978926	41979424	6.43981	2.77168	2.32343	no	-	no	no	no	no
chr1	41981679	41982162	9.40871	7.90985	1.18949	no	-	no	no	no	no
chr1	41990894	41991135	0	2.72168	0	no	-	no	no	no	no
chr1	42017446	42017568	3.44989	0	0	no	-	no	no	no	no
chr1	42027843	42028138	0	2.8672	0	no	-	no	no	no	no
chr1	42039538	42040150	0	3.11008	0	no	-	no	no	no	no
chr1	42039719	42040155	11.7082	2.31684	5.05353	no	-	no	no	no	no
chr1	42044754	42044876	3.62854	3.45757	1.04945	no	-	no	no	no	no
chr1	42059057	42059172	2.56841	0	0	no	-	no	no	no	no
chr1	42123647	42123881	2.45606	0	0	no	-	no	no	no	no
chr1	42128191	42128306	3.10612	0	0	no	-	no	no	no	no
chr1	42129016	42129131	2.30907	0	0	no	-	no	no	no	no
chr1	42132711	42132830	2.64144	0	0	no	-	no	no	no	no
chr1	42157336	42157453	0	3.17781	0	no	-	yes	no	no	no
chr1	42160761	42160884	0	2.75923	0	no	-	no	no	no	no
chr1	42165296	42165440	0	3.33157	0	no	-	no	no	no	no
chr1	42173904	42174021	0	3.11078	0	no	-	no	no	no	no
chr1	42174161	42174276	2.99849	6.66313	0.450012	no	-	no	no	no	no
chr1	42192516	42192745	3.37966	3.33379	1.01376	no	-	no	no	no	no
chr1	42220242	42220448	3.75212	0	0	no	-	no	no	no	no
chr1	42245001	42245246	3.86729	0	0	no	-	no	no	no	no
chr1	42277254	42277448	3.74421	8.49512	0.440748	no	-	no	no	no	no
chr1	42277319	42277470	0	2.42403	0	no	-	no	no	no	no
chr1	42277592	42277961	9.94445	4.85112	2.04993	no	-	no	no	no	no
chr1	42322291	42322408	0	10.2029	0	no	-	no	no	no	no
chr1	42323263	42323399	3.1217	0	0	no	-	no	no	no	no
chr1	42357319	42357435	2.70987	0	0	no	-	no	no	no	no
chr1	42426156	42426334	0	2.49867	0	no	-	no	no	no	no
chr1	42477542	42477701	0	2.79264	0	no	-	no	no	no	no
chr1	42501228	42501611	0	2.62415	0	yes	HIVEP3	no	no	yes	no
chr1	42501304	42501685	6.34376	3.11078	2.03928	yes	HIVEP3	no	no	yes	no
chr1	42612500	42612887	10.8474	5.88635	1.84281	no	-	no	no	no	no
chr1	42614001	42614179	3.14825	0	0	no	-	no	no	no	no
chr1	42638938	42639426	0	2.56797	0	no	-	no	no	no	no
chr1	42638970	42639565	10.5557	4.78266	2.20709	no	-	no	no	no	no
chr1	42642519	42643072	6.07717	2.76956	2.19427	no	-	no	no	no	no
chr1	42730298	42730413	2.9465	0	0	no	-	no	no	no	no
chr1	42732232	42732530	0	3.20337	0	no	-	no	no	no	no
chr1	42748651	42748768	0	2.99316	0	no	-	no	no	no	no
chr1	42777104	42777221	0	2.98399	0	no	-	no	no	no	no
chr1	42780226	42780374	4.8447	5.38453	0.899744	no	-	no	no	no	no
chr1	42780246	42780440	0	2.32214	0	no	-	no	no	no	no
chr1	42799865	42799986	2.76235	6.4767	0.426506	no	-	no	no	no	no
chr1	42801073	42801190	3.74451	0	0	yes	FOXJ3	no	no	yes	no
chr1	42806192	42806307	2.53586	0	0	no	-	no	no	no	no
chr1	42809944	42810195	4.62968	2.72168	1.70104	no	-	no	no	no	yes
chr1	42862805	42862922	0	2.63866	0	no	-	no	no	no	no
chr1	42945397	42945655	0	3.0698	0	no	-	no	no	no	no
chr1	42966801	42966918	0	2.8342	0	no	-	no	no	no	no
chr1	42977352	42977519	3.29867	0	0	no	-	no	no	no	no
chr1	43043657	43043913	8.44915	4.28332	1.97257	no	-	no	no	no	no
chr1	43043667	43043894	0	2.87853	0	no	-	no	no	no	no
chr1	43147561	43147766	0	3.35829	0	no	-	no	no	no	no
chr1	43196875	43197029	4.92794	0	0	no	-	no	no	no	no
chr1	43201697	43202224	7.40281	3.1383	2.35886	no	-	no	no	no	no
chr1	43201736	43202167	0	2.91901	0	no	-	no	no	no	no
chr1	43202975	43203321	5.00283	4.89253	1.02254	no	-	yes	no	no	no
chr1	43203050	43203294	0	3.11841	0	no	-	yes	no	no	no
chr1	43212797	43213276	9.7436	2.32581	4.18934	no	-	no	no	no	no
chr1	43222630	43223170	9.32463	3.2837	2.83967	no	-	no	no	no	no
chr1	43231621	43231957	2.89938	3.48147	0.832803	no	-	no	no	no	no
chr1	43243401	43243880	6.25354	2.47455	2.52714	no	-	yes	no	no	no
chr1	43272444	43272626	3.52575	0	0	no	-	no	no	no	yes
chr1	43303673	43303790	0	2.63866	0	no	-	no	no	no	no
chr1	43312167	43312339	0	2.80243	0	yes	ZNF691	no	no	no	no
chr1	43312187	43312404	6.07717	4.3944	1.38294	yes	ZNF691	no	no	no	no
chr1	43379115	43379333	7.92115	3.44676	2.29814	no	-	no	no	no	no
chr1	43388360	43388508	2.7019	5.51482	0.489934	no	-	no	no	no	no
chr1	43388542	43389060	0	2.77168	0	no	-	yes	no	no	no
chr1	43388581	43389067	9.7603	6.89352	1.41587	no	-	yes	no	no	no
chr1	43396733	43397081	6.20305	4.13611	1.49973	no	-	no	no	yes	no
chr1	43424016	43424165	2.29296	0	0	yes	SLC2A1	no	no	no	no
chr1	43429179	43429361	0	2.31684	0	no	-	no	no	no	no
chr1	43449460	43449583	0	3.45757	0	no	-	no	no	no	no
chr1	43457726	43457924	0	3.20544	0	no	-	no	no	no	no
chr1	43510482	43510695	2.68043	0	0	no	-	no	no	no	no
chr1	43524719	43524893	0	2.39878	0	no	-	no	no	no	yes
chr1	43525852	43526022	0	2.82798	0	no	-	no	no	no	yes
chr1	43534615	43534734	0	2.64125	0	no	-	no	no	no	no
chr1	43539279	43539607	0	2.60279	0	no	-	no	no	no	no
chr1	43539326	43539676	8.16444	2.7465	2.97267	no	-	no	no	no	no
chr1	43609114	43609679	0	3.33379	0	no	-	no	no	no	yes
chr1	43609239	43609650	4.97223	6.61517	0.751641	no	-	no	no	no	yes
chr1	43692906	43693316	8.96972	5.08967	1.76234	no	-	no	no	no	yes
chr1	43692948	43693252	0	2.83171	0	no	-	no	no	no	yes
chr1	43703862	43704067	8.82706	4.22143	2.09101	no	-	no	no	no	yes
chr1	43746228	43746405	4.73824	4.52613	1.04686	no	-	no	no	no	no
chr1	43799173	43799290	0	2.77529	0	no	-	no	no	no	no
chr1	43823717	43824238	0	3.11078	0	no	-	no	no	no	no
chr1	43823731	43824166	6.44548	3.04618	2.11592	no	-	no	no	no	no
chr1	43854610	43854725	2.4013	0	0	no	-	no	no	no	yes
chr1	43880267	43880686	0	3.12952	0	no	-	no	no	no	no
chr1	43880402	43880610	5.83664	5.60788	1.04079	no	-	no	no	no	no
chr1	43994608	43995133	0	2.76956	0	no	-	no	no	no	no
chr1	43994768	43995184	7.33021	2.75741	2.65837	no	-	no	no	no	no
chr1	43997132	43997451	4.28068	2.39346	1.78849	no	-	no	no	no	no
chr1	44018763	44018878	3.03819	0	0	no	-	no	no	no	no
chr1	44020145	44020461	7.68418	4.40908	1.74281	no	-	no	no	no	no
chr1	44051504	44051652	4.07105	0	0	no	-	no	no	no	no
chr1	44066197	44066321	0	3.41945	0	no	-	no	no	no	no
chr1	44075298	44075423	3.68113	0	0	no	-	yes	no	no	no
chr1	44078346	44078463	0	2.82883	0	no	-	no	no	no	no
chr1	44087825	44087940	2.41071	0	0	no	-	no	no	no	yes
chr1	44097819	44097960	0	2.72168	0	no	-	no	no	no	no
chr1	44119101	44119330	4.20752	3.1172	1.34978	no	-	no	no	no	yes
chr1	44119153	44119379	0	3.39358	0	no	-	no	no	no	yes
chr1	44170568	44170724	0	3.16268	0	no	-	no	yes	no	no
chr1	44207328	44207530	2.38951	0	0	no	-	no	no	no	no
chr1	44229122	44229606	0	3.1383	0	no	-	no	no	no	yes
chr1	44229169	44229461	7.03369	3.64722	1.92851	no	-	no	no	no	yes
chr1	44247610	44247757	0	2.32581	0	no	-	no	no	yes	no
chr1	44274550	44274707	2.9736	0	0	no	-	no	no	no	no
chr1	44282820	44282942	0	3.2837	0	no	-	no	no	no	no
chr1	44297864	44298022	0	3.48147	0	no	-	no	no	no	no
chr1	44355964	44356133	0	2.47455	0	no	-	no	no	no	no
chr1	44368531	44368692	0	2.75741	0	no	-	no	no	no	no
chr1	44387542	44387657	2.75991	0	0	no	-	no	no	no	no
chr1	44396202	44396334	0	4.3944	0	no	-	no	no	no	no
chr1	44396322	44396437	3.1049	3.08708	1.00577	no	-	no	no	no	no
chr1	44399900	44400233	5.29623	8.49512	0.623444	no	-	no	no	no	no
chr1	44400383	44400763	6.5548	7.72184	0.848865	no	-	no	no	no	no
chr1	44412047	44412349	5.74529	3.52675	1.62906	yes	IPO13	no	no	no	yes
chr1	44412204	44412385	0	6.89352	0	yes	IPO13	no	no	no	yes
chr1	44448447	44448620	4.25841	0	0	no	-	no	no	no	no
chr1	44460491	44460741	6.75627	6.13537	1.1012	no	-	no	no	no	no
chr1	44468622	44468756	0	3.16608	0	no	-	no	no	no	no
chr1	44470307	44470422	4.14596	0	0	no	-	no	no	no	no
chr1	44471211	44471666	0	2.7465	0	no	-	no	no	no	yes
chr1	44471323	44471676	8.3857	5.66341	1.48068	no	-	no	no	no	yes
chr1	44496436	44496578	3.84603	9.51504	0.404205	no	-	no	no	no	no
chr1	44496442	44496563	0	5.08967	0	no	-	no	no	no	no
chr1	44502342	44502573	6.51277	2.75741	2.36192	no	-	yes	no	no	yes
chr1	44557991	44558148	4.60025	0	0	no	-	no	no	no	no
chr1	44598459	44598606	3.58633	0	0	no	-	no	no	no	no
chr1	44636138	44636420	4.1141	0	0	no	-	no	no	no	no
chr1	44682842	44683065	3.64096	2.69136	1.35283	no	-	no	no	no	no
chr1	44683248	44683784	0	3.04618	0	no	-	no	no	no	no
chr1	44683466	44683730	10.5925	3.22964	3.27977	no	-	no	no	no	no
chr1	44689726	44689841	3.87722	0	0	no	-	no	no	no	no
chr1	44691724	44691863	4.43111	0	0	no	-	no	no	no	no
chr1	44702277	44702551	4.50418	3.08708	1.45904	no	-	no	no	no	no
chr1	44703928	44704064	2.75991	3.43661	0.803091	no	-	no	no	no	no
chr1	44760461	44760618	0	2.39346	0	no	-	no	no	no	no
chr1	44760510	44760646	4.61099	2.1589	2.13581	no	-	no	no	no	no
chr1	44783857	44784337	0	4.40908	0	no	-	no	no	no	no
chr1	44783936	44784508	7.98451	3.16608	2.52189	no	-	no	no	no	no
chr1	44815570	44815685	3.08947	0	0	no	-	yes	no	no	no
chr1	44843889	44844152	10.8814	4.82547	2.255	no	-	no	no	no	no
chr1	44843890	44844192	0	3.08708	0	no	-	no	no	no	no
chr1	44872162	44872291	0	3.1172	0	no	-	no	no	no	no
chr1	44903328	44903455	3.69729	0	0	no	-	no	no	no	no
chr1	44904848	44904991	0	2.98957	0	no	-	no	no	no	no
chr1	44930643	44930758	3.08947	0	0	no	-	no	no	no	no
chr1	44963355	44963499	4.36037	0	0	no	-	no	no	no	no
chr1	44977825	44977940	4.00723	0	0	no	-	no	no	no	no
chr1	45037738	45038083	3.84209	4.83875	0.794025	no	-	no	no	no	no
chr1	45037897	45038155	0	3.64722	0	no	-	no	no	no	no
chr1	45060795	45061098	8.26528	4.13611	1.99832	no	-	no	no	no	no
chr1	45075171	45075395	3.97218	0	0	no	-	no	no	no	no
chr1	45087132	45087247	3.55368	0	0	no	-	no	no	no	no
chr1	45089303	45089418	3.08947	0	0	no	-	no	no	no	no
chr1	45098104	45098302	3.19381	0	0	no	-	yes	no	no	yes
chr1	45110079	45110221	4.44915	0	0	no	-	no	no	no	no
chr1	45118511	45118853	0	3.08708	0	no	-	no	no	no	no
chr1	45118630	45119037	9.53154	3.04618	3.12901	no	-	no	no	no	no
chr1	45121278	45121591	13.3475	3.16608	4.21577	no	-	no	no	no	no
chr1	45138142	45138305	4.2892	0	0	no	-	no	no	no	no
chr1	45142866	45143200	6.51133	3.9691	1.64051	no	-	no	no	no	no
chr1	45142916	45143135	0	3.52675	0	no	-	no	no	no	no
chr1	45149354	45149508	4.00938	0	0	no	-	no	no	no	yes
chr1	45173513	45173862	7.503	3.37494	2.22315	no	-	no	no	no	no
chr1	45180623	45181008	8.55014	2.94578	2.9025	no	-	no	no	no	yes
chr1	45194814	45194929	3.97218	3.44676	1.15244	no	-	no	no	no	no
chr1	45195031	45195262	9.38236	4.06157	2.31003	no	-	no	no	no	no
chr1	45195977	45196154	4.09866	0	0	no	-	no	no	no	no
chr1	45197025	45197240	10.7854	3.7831	2.85093	no	-	no	no	no	no
chr1	45251845	45251985	5.53889	0	0	no	-	no	no	no	no
chr1	45259330	45259661	9.81413	2.93896	3.33932	no	-	no	no	no	no
chr1	45259355	45259664	0	2.75741	0	no	-	no	no	no	no
chr1	45265424	45265612	7.09328	2.7465	2.58266	no	-	no	no	no	no
chr1	45267319	45267434	3.95747	0	0	no	-	no	no	no	no
chr1	45273311	45273473	3.58633	0	0	no	-	no	no	no	no
chr1	45290679	45290864	0	3.84183	0	no	-	no	no	no	no
chr1	45300302	45300436	0	2.69136	0	no	-	no	no	no	no
chr1	45301574	45301818	0	3.22964	0	no	-	no	no	no	yes
chr1	45301612	45301836	4.53062	16.2463	0.278871	no	-	no	no	no	yes
chr1	45378810	45378927	0	3.09303	0	no	-	no	no	no	no
chr1	45389265	45389403	0	3.08708	0	no	-	no	no	no	no
chr1	45390669	45391091	0	3.43661	0	no	-	no	no	no	no
chr1	45390926	45391166	4.79071	3.10209	1.54435	no	-	no	no	no	no
chr1	45415443	45415558	3.08947	0	0	no	-	no	no	no	no
chr1	45441680	45441797	0	3.16608	0	no	-	no	no	no	no
chr1	45480143	45480491	0	2.41273	0	no	-	no	no	no	yes
chr1	45480214	45480499	7.93475	4.06143	1.95368	no	-	no	no	no	yes
chr1	45484322	45484726	4.27507	3.11171	1.37387	no	-	no	no	no	no
chr1	45627525	45627679	3.55368	0	0	no	-	no	no	no	no
chr1	45765912	45766327	0	3.98609	0	no	-	no	no	no	no
chr1	45766039	45766177	5.29623	3.117	1.69914	no	-	no	no	no	no
chr1	45769265	45769380	3.2565	6.40304	0.508587	yes	LOC400752	no	no	no	yes
chr1	45769462	45769957	6.79594	3.72328	1.82526	yes	LOC400752	no	no	no	yes
chr1	45825534	45825831	0	4.83875	0	no	-	no	no	no	no
chr1	45825554	45825863	4.53062	7.05618	0.642078	no	-	no	no	no	no
chr1	45829135	45829250	3.15689	0	0	no	-	no	no	no	no
chr1	45917291	45917408	4.41237	0	0	no	-	no	no	no	no
chr1	45949219	45949452	4.13987	4.40254	0.940337	no	-	yes	no	no	yes
chr1	45949292	45949464	0	3.67927	0	no	-	yes	no	no	yes
chr1	45958849	45959030	4.92508	8.82023	0.558385	no	-	no	no	no	no
chr1	45978242	45978639	7.503	4.90352	1.53013	no	-	no	no	no	no
chr1	45986969	45987105	0	3.16608	0	no	-	no	no	no	no
chr1	45987847	45987986	0	3.04618	0	yes	PRDX1	no	no	no	no
chr1	45988069	45988209	4.09866	3.44676	1.18913	yes	PRDX1	no	no	no	no
chr1	45990752	45990867	3.19381	0	0	no	-	no	no	no	no
chr1	46035751	46036052	8.62829	7.49719	1.15087	no	-	no	no	no	no
chr1	46049977	46050258	4.13987	4.70234	0.880385	yes	NASP	no	no	no	no
chr1	46111495	46111614	0	3.9691	0	yes	RPS15AP10	no	no	no	no
chr1	46120775	46120905	0	3.37494	0	no	-	no	no	no	no
chr1	46126179	46126294	3.45666	0	0	no	-	yes	no	no	no
chr1	46127481	46127624	3.45666	0	0	no	-	no	no	no	no
chr1	46215923	46216080	3.0199	0	0	yes	IPP	no	no	no	no
chr1	46216435	46216593	0	2.94578	0	yes	IPP	no	no	no	no
chr1	46216458	46216702	4.81379	4.70234	1.0237	yes	IPP	no	no	no	no
chr1	46227551	46227666	3.29659	0	0	no	-	no	no	no	no
chr1	46236357	46236472	3.80016	0	0	no	-	no	no	no	no
chr1	46309436	46309633	0	4.06157	0	no	-	no	no	no	no
chr1	46309438	46309634	3.11841	7.01369	0.444618	no	-	no	no	no	no
chr1	46347367	46347482	3.0199	0	0	no	-	no	no	no	no
chr1	46362008	46362123	3.54642	0	0	no	-	no	no	no	no
chr1	46425152	46425269	0	3.7831	0	no	-	no	no	no	no
chr1	46453016	46453195	3.53082	0	0	no	-	no	no	no	no
chr1	46475476	46475682	4.03807	0	0	no	-	no	no	no	no
chr1	46484444	46484587	0	3.77561	0	no	-	no	no	no	no
chr1	46487766	46487985	0	2.93896	0	no	-	no	no	no	no
chr1	46500629	46500747	3.08947	0	0	no	-	no	no	no	no
chr1	46502707	46503044	0	2.7465	0	no	-	no	no	no	no
chr1	46502752	46503070	11.5827	4.40254	2.6309	no	-	no	no	no	no
chr1	46627306	46627421	2.86231	0	0	no	-	no	no	no	no
chr1	46645278	46645606	0	4.7868	0	no	-	yes	no	no	no
chr1	46645306	46645623	10.4826	4.13611	2.53441	no	-	no	no	no	no
chr1	46645946	46646145	2.75991	4.70234	0.586923	no	-	yes	no	no	no
chr1	46663785	46663983	5.52609	0	0	yes	POMGNT1	no	no	no	no
chr1	46689201	46689603	11.3846	3.69376	3.08213	no	-	no	no	no	no
chr1	46689901	46690042	3.49457	16.479	0.212062	no	-	no	no	no	no
chr1	46710416	46710984	10.9687	7.25678	1.51151	no	-	no	no	no	no
chr1	46742678	46742795	0	3.11171	0	no	-	no	no	no	no
chr1	46756991	46757108	0	3.08708	0	no	-	no	no	no	no
chr1	46767782	46768007	5.17698	5.94054	0.871466	no	-	no	no	no	no
chr1	46767815	46767973	0	3.117	0	no	-	no	no	no	no
chr1	46769555	46769725	5.06559	0	0	yes	UQCRH	no	no	no	no
chr1	46799204	46799532	6.90264	3.8965	1.7715	no	-	no	no	no	no
chr1	46806256	46806645	6.5548	5.21708	1.25641	yes	NSUN4	no	no	no	no
chr1	46806962	46807077	3.89301	0	0	yes	NSUN4	no	no	no	no
chr1	46813832	46814074	12.7992	3.43661	3.72438	no	-	no	no	no	no
chr1	46813855	46814054	0	4.3944	0	no	-	no	no	no	no
chr1	46871998	46872250	13.3207	3.08708	4.31497	no	-	yes	no	no	no
chr1	46871999	46872270	0	4.40254	0	no	-	yes	no	no	no
chr1	46877809	46877980	3.84603	8.44287	0.455536	no	-	no	no	no	no
chr1	46879417	46879543	3.79488	2.41273	1.57286	no	-	no	no	no	no
chr1	46907173	46907328	3.35051	0	0	no	-	no	no	no	no
chr1	46908090	46908706	8.66956	3.08708	2.80834	no	-	no	no	no	no
chr1	46911779	46911894	3.49334	0	0	no	-	no	no	no	yes
chr1	46912489	46912870	11.0338	13.2303	0.833979	no	-	no	no	no	yes
chr1	46933222	46933339	0	4.70234	0	no	-	no	no	no	no
chr1	46943038	46943487	0	3.43661	0	no	-	yes	no	no	no
chr1	46943084	46943462	9.87617	14.6948	0.672086	no	-	yes	no	no	no
chr1	46953421	46953899	10.8403	5.17014	2.09672	no	-	no	no	no	no
chr1	46993630	46993989	9.31471	4.11455	2.26385	no	-	yes	no	no	no
chr1	46993701	46994013	0	4.70234	0	no	-	yes	no	no	no
chr1	46998435	46998741	9.4577	4.70234	2.01128	no	-	no	no	no	no
chr1	46998536	46998783	0	3.52809	0	no	-	no	no	no	no
chr1	47000826	47001138	8.62829	3.43661	2.5107	no	-	no	no	no	no
chr1	47000900	47001063	0	3.4242	0	no	-	no	no	no	no
chr1	47013775	47013962	3.53082	2.63866	1.33811	no	-	no	no	no	no
chr1	47088246	47088433	5.79133	4.55067	1.27263	no	-	no	no	no	no
chr1	47122286	47122401	3.33604	0	0	no	-	no	no	no	no
chr1	47127873	47127988	3.53082	0	0	no	-	no	no	no	no
chr1	47132986	47133127	0	4.10824	0	no	-	no	no	no	no
chr1	47190920	47191299	5.09695	4.70234	1.08392	no	-	no	no	no	no
chr1	47190928	47191241	0	4.40254	0	no	-	no	no	no	no
chr1	47201543	47201687	3.1049	4.02658	0.771101	no	-	no	no	no	no
chr1	47213507	47213662	2.50142	0	0	no	-	no	no	no	no
chr1	47229220	47229335	3.08947	0	0	no	-	no	no	no	no
chr1	47231505	47231725	4.25841	0	0	no	-	no	no	no	no
chr1	47400661	47400781	4.14596	3.8451	1.07825	no	-	no	no	no	no
chr1	47427314	47427429	3.72611	0	0	no	-	no	no	no	no
chr1	47468030	47468241	3.44989	0	0	no	-	no	no	no	no
chr1	47470356	47470471	2.64812	0	0	no	-	no	no	no	no
chr1	47495641	47495802	3.25728	0	0	no	-	no	no	no	no
chr1	47609483	47609649	3.55368	0	0	no	-	no	no	no	no
chr1	47639552	47639787	0	2.98809	0	no	-	no	no	no	no
chr1	47639590	47639748	5.73759	5.5156	1.04025	no	-	no	no	no	no
chr1	47641074	47641552	10.0047	2.93896	3.40416	no	-	no	no	no	no
chr1	47644825	47645156	12.9643	7.6413	1.69661	yes	LINC00853	yes	no	no	no
chr1	47654057	47654172	4.14596	0	0	no	-	no	no	no	no
chr1	47658564	47659103	7.24477	5.29013	1.36949	no	-	no	no	no	no
chr1	47659929	47660044	3.32333	0	0	no	-	no	no	no	no
chr1	47728585	47728783	5.17484	3.52675	1.46731	no	-	no	no	no	no
chr1	47728617	47728839	0	3.81385	0	no	-	no	no	no	no
chr1	47738454	47738569	3.53082	0	0	no	-	no	no	no	no
chr1	47766469	47766584	4.27507	0	0	no	-	no	no	no	no
chr1	47799884	47800138	4.60025	7.05351	0.652193	yes	CMPK1	no	no	no	no
chr1	47805202	47805360	4.85488	5.8595	0.828549	no	-	yes	no	no	no
chr1	47845407	47845524	0	3.43661	0	no	-	no	no	no	no
chr1	47854415	47854774	10.646	6.20417	1.71595	no	-	no	no	no	no
chr1	47854515	47854729	0	3.08708	0	no	-	no	no	no	no
chr1	47869009	47869215	4.32585	0	0	no	-	no	no	no	no
chr1	47890009	47890437	0	2.41273	0	no	-	no	no	no	no
chr1	47890081	47890312	5.29623	8.22909	0.643599	no	-	no	no	no	no
chr1	47897984	47898300	0	3.08708	0	yes	FOXD2-AS1	no	no	no	no
chr1	47898058	47898362	8.70966	3.12913	2.78341	yes	FOXD2-AS1	no	no	no	no
chr1	47902151	47902490	10.5925	3.70835	2.85638	yes	FOXD2	no	no	no	no
chr1	47903322	47903772	20.7298	11.9972	1.72788	yes	FOXD2	no	no	no	no
chr1	47910286	47910439	3.30991	0	0	no	-	no	no	no	no
chr1	47915625	47915880	6.47122	16.4227	0.394041	no	-	no	no	no	no
chr1	47944578	47944695	0	4.11455	0	no	-	no	no	no	no
chr1	47983411	47983528	0	4.70234	0	no	-	no	no	no	no
chr1	47993409	47993638	0	3.43661	0	no	-	no	no	no	no
chr1	47993571	47993731	3.53082	3.73789	0.944602	no	-	no	no	no	no
chr1	47995277	47995392	3.76384	4.48079	0.839995	no	-	no	no	no	no
chr1	48014084	48014201	0	4.11455	0	no	-	no	no	no	no
chr1	48034061	48034249	0	4.11455	0	no	-	no	no	no	no
chr1	48035692	48035849	3.08947	0	0	no	-	no	no	no	no
chr1	48049504	48049654	0	4.70234	0	no	-	no	no	no	no
chr1	48076764	48076881	0	4.02658	0	no	-	no	no	no	no
chr1	48087665	48087815	0	4.68216	0	no	-	no	no	no	no
chr1	48144662	48144799	5.24001	0	0	no	-	no	no	no	no
chr1	48158343	48158595	0	3.46622	0	no	-	no	no	no	no
chr1	48165598	48165715	0	4.07908	0	no	-	no	no	no	no
chr1	48170004	48170223	4.79071	0	0	no	-	no	no	no	no
chr1	48173837	48173954	0	3.8451	0	no	-	no	no	no	no
chr1	48175215	48175332	0	3.72306	0	no	-	no	no	no	no
chr1	48175518	48175635	0	2.75741	0	no	-	no	no	no	no
chr1	48176140	48176440	0	3.30366	0	no	-	no	no	no	no
chr1	48176163	48176624	3.75212	3.26901	1.14778	no	-	no	no	no	no
chr1	48183711	48183891	2.64812	0	0	no	-	no	no	no	no
chr1	48192021	48192257	7.94435	3.72306	2.13382	no	-	no	no	no	yes
chr1	48214445	48214574	4.14596	0	0	no	-	no	no	no	no
chr1	48216762	48216879	0	5.5156	0	no	-	no	no	no	no
chr1	48220970	48221617	9.47648	2.72755	3.47436	no	-	no	no	no	no
chr1	48221041	48221409	0	2.93896	0	no	-	no	no	no	no
chr1	48291109	48291240	4.14596	0	0	no	-	yes	no	no	no
chr1	48319551	48319693	4.73824	0	0	no	-	no	no	no	no
chr1	48408651	48408822	0	4.11455	0	no	-	no	no	no	no
chr1	48438908	48439048	3.58633	0	0	no	-	no	no	no	no
chr1	48463273	48463673	0	5.29013	0	no	-	no	no	no	no
chr1	48463281	48463659	14.955	3.52809	4.23883	no	-	no	no	no	no
chr1	48526885	48527158	0	3.52675	0	no	-	no	no	no	no
chr1	48526970	48527119	5.53889	3.9754	1.39329	no	-	no	no	no	no
chr1	48531690	48531805	3.46381	0	0	no	-	yes	no	no	no
chr1	48559416	48559698	0	4.11455	0	no	-	no	no	no	no
chr1	48559471	48559679	8.29192	3.76791	2.20067	no	-	no	no	no	no
chr1	48568019	48568170	4.73824	0	0	no	-	no	no	no	no
chr1	48575073	48575447	4.08222	6.17416	0.661178	no	-	no	no	no	no
chr1	48667927	48668163	5.51983	3.44676	1.60145	no	-	no	no	no	no
chr1	48669066	48669283	7.503	3.117	2.40712	no	-	no	no	no	no
chr1	48685997	48686112	3.55368	0	0	no	-	yes	no	no	no
chr1	48697213	48697387	3.55368	0	0	no	-	no	no	no	no
chr1	48702715	48702920	4.73824	2.64607	1.79067	no	-	no	no	no	no
chr1	48858538	48858673	3.43184	0	0	no	-	yes	no	no	no
chr1	48938506	48938645	0	3.12913	0	no	-	no	no	no	no
chr1	48948310	48948471	3.46381	0	0	no	-	no	no	no	no
chr1	48958818	48958933	3.32333	0	0	no	-	no	no	no	no
chr1	48963770	48964466	9.33292	3.92552	2.3775	no	-	no	no	no	no
chr1	48963805	48964480	0	3.70835	0	no	-	no	no	no	no
chr1	48978026	48978141	3.074	0	0	no	-	yes	no	no	no
chr1	48991369	48991484	3.08947	2.66992	1.15714	no	-	no	no	no	no
chr1	48996234	48996732	10.1932	3.55387	2.86819	no	-	no	no	no	no
chr1	49018171	49018461	0	3.73789	0	no	-	no	no	no	no
chr1	49019792	49019989	0	4.48079	0	no	-	no	no	no	no
chr1	49020936	49021061	3.77019	0	0	no	-	no	no	no	no
chr1	49038340	49038780	0	4.3944	0	no	-	no	no	no	no
chr1	49038390	49038612	13.402	3.89915	3.43717	no	-	no	no	no	no
chr1	49070685	49070820	3.78512	3.97134	0.953109	no	-	no	no	no	no
chr1	49071816	49071931	2.70365	0	0	no	-	no	no	no	no
chr1	49111687	49111802	3.09723	0	0	no	-	no	no	no	no
chr1	49123989	49124117	3.84603	3.81385	1.00844	no	-	yes	no	no	yes
chr1	49127528	49127657	4.79071	0	0	no	-	no	no	no	no
chr1	49133852	49134001	3.69729	0	0	no	-	no	no	no	no
chr1	49139502	49139643	4.12965	0	0	no	-	no	no	no	no
chr1	49142990	49143288	13.8398	3.69376	3.74681	no	-	no	no	no	no
chr1	49154011	49154240	0	3.72306	0	no	-	no	no	no	no
chr1	49154115	49154302	5.53889	6.54885	0.845781	no	-	no	no	no	no
chr1	49162785	49163203	13.2406	3.16608	4.18201	no	-	no	no	no	no
chr1	49163615	49163803	0	8.11052	0	no	-	no	no	no	no
chr1	49186657	49186838	0	5.02607	0	no	-	no	no	no	no
chr1	49192439	49192556	0	3.581	0	no	-	no	no	no	no
chr1	49202971	49203088	0	3.52809	0	no	-	no	no	no	no
chr1	49204368	49204485	0	3.9754	0	no	-	no	no	no	no
chr1	49211196	49211327	3.58633	0	0	no	-	no	no	no	no
chr1	49215776	49215918	0	3.7831	0	no	-	no	no	no	no
chr1	49215813	49216058	3.78512	12.7893	0.295959	no	-	no	no	no	no
chr1	49229599	49229743	3.72611	0	0	no	-	no	no	no	no
chr1	49241821	49241972	4.985	0	0	no	-	no	no	no	no
chr1	49246875	49246990	2.64812	0	0	no	-	no	no	no	no
chr1	49283184	49283542	0	3.01196	0	no	-	no	no	no	no
chr1	49283195	49283505	9.18314	3.79144	2.42207	no	-	no	no	no	no
chr1	49336270	49336580	3.79488	4.41011	0.860496	no	-	no	no	no	no
chr1	49381872	49381987	3.24623	0	0	no	-	no	no	no	no
chr1	49382234	49382449	4.48486	4.74085	0.946003	no	-	no	no	no	no
chr1	49382345	49382488	0	3.117	0	no	-	no	no	no	no
chr1	49384647	49384762	3.32444	0	0	no	-	no	no	no	no
chr1	49402978	49403093	4.09301	0	0	no	-	no	no	no	no
chr1	49407227	49407373	3.37813	0	0	no	-	no	no	no	no
chr1	49487238	49487356	3.45666	0	0	no	-	no	no	no	no
chr1	49502449	49502617	4.41353	5.19146	0.850152	no	-	no	no	no	no
chr1	49502544	49502661	0	3.82941	0	no	-	no	no	no	no
chr1	49652591	49652706	3.37813	0	0	no	-	no	no	no	no
chr1	49669711	49669829	0	2.64607	0	no	-	no	no	no	no
chr1	49691688	49691803	3.49457	0	0	no	-	no	no	no	no
chr1	49765016	49765131	3.81262	0	0	no	-	no	no	no	no
chr1	49771958	49772073	3.00633	0	0	no	-	no	no	no	no
chr1	49844476	49844605	0	4.35868	0	no	-	no	no	no	no
chr1	49859492	49859629	0	3.8451	0	no	-	yes	no	no	no
chr1	49864242	49864380	3.5083	0	0	no	-	no	no	no	no
chr1	49870680	49870797	0	3.92552	0	no	-	no	no	no	no
chr1	49912100	49912215	2.98443	0	0	no	-	no	no	no	no
chr1	49939940	49940057	0	3.69376	0	no	-	no	no	no	no
chr1	49992647	49992769	4.09866	0	0	no	-	no	no	no	no
chr1	50009249	50009366	0	2.66992	0	no	-	no	no	no	no
chr1	50096723	50096920	0	3.55387	0	no	-	no	no	no	no
chr1	50132705	50132853	0	4.52416	0	no	-	no	no	no	no
chr1	50186519	50186634	3.90893	0	0	no	-	no	no	no	no
chr1	50196369	50196512	0	3.89915	0	no	-	no	no	no	no
chr1	50212979	50213107	4.11061	0	0	no	-	no	no	no	no
chr1	50243134	50243338	0	3.97134	0	no	-	no	no	no	no
chr1	50244198	50244315	0	3.08708	0	no	-	no	no	no	no
chr1	50272802	50272923	0	3.67927	0	no	-	no	no	no	no
chr1	50286053	50286234	0	3.81385	0	no	-	no	no	no	no
chr1	50364414	50364529	2.93106	0	0	no	-	no	no	no	no
chr1	50371626	50371743	0	3.581	0	no	-	no	no	no	no
chr1	50444197	50444314	0	3.28235	0	no	-	no	no	no	no
chr1	50447478	50447605	0	3.8451	0	no	-	no	no	no	no
chr1	50527455	50527574	3.99379	0	0	no	-	no	no	no	no
chr1	50546535	50546871	0	3.69376	0	no	-	no	no	no	no
chr1	50546786	50546930	5.60839	3.98609	1.40699	no	-	no	no	no	no
chr1	50561742	50561874	3.68406	0	0	no	-	no	no	no	no
chr1	50680903	50681018	2.82676	0	0	no	-	no	no	no	no
chr1	50684237	50684352	4.34304	0	0	no	-	no	no	no	no
chr1	50695857	50696034	3.46381	0	0	no	-	no	no	no	no
chr1	50714142	50714257	2.64812	0	0	no	-	no	no	no	no
chr1	50732687	50732802	3.12083	0	0	no	-	no	no	no	no
chr1	50737600	50738000	8.82706	3.10209	2.84552	no	-	no	no	no	yes
chr1	50737601	50738069	0	3.16608	0	no	-	no	no	no	yes
chr1	50798644	50799179	7.24477	3.08708	2.3468	no	-	no	no	no	no
chr1	50799310	50799566	10.4551	4.00097	2.61314	no	-	no	no	no	no
chr1	50814405	50814793	6.5548	3.44789	1.9011	no	-	no	no	no	no
chr1	50814457	50814800	0	4.06157	0	no	-	no	no	no	no
chr1	50834178	50834471	5.86482	4.2687	1.37391	no	-	no	no	no	no
chr1	50848685	50848800	4.57666	0	0	no	-	no	no	no	no
chr1	50857589	50857745	2.84952	0	0	no	-	no	no	no	no
chr1	50881711	50881873	3.45666	0	0	no	-	no	no	no	no
chr1	50889958	50890079	3.34564	0	0	no	-	no	no	no	no
chr1	50949850	50949965	3.11841	0	0	no	-	no	no	no	no
chr1	51070331	51070550	3.24623	0	0	no	-	no	no	no	no
chr1	51071258	51071468	5.36227	6.38263	0.840135	no	-	no	no	no	no
chr1	51071264	51071573	0	4.41011	0	no	-	no	no	no	no
chr1	51161121	51161236	3.14922	0	0	no	-	no	no	no	no
chr1	51169732	51170183	8.71084	3.81385	2.284	no	-	no	no	no	no
chr1	51186511	51186626	2.99534	3.36285	0.890715	no	-	no	no	no	no
chr1	51215647	51215905	3.65201	0	0	no	-	no	no	no	no
chr1	51240127	51240297	4.51376	5.2909	0.853118	no	-	no	no	no	no
chr1	51240495	51240734	0	3.39459	0	no	-	no	no	no	no
chr1	51240579	51240763	5.86789	6.23439	0.941213	no	-	no	no	no	no
chr1	51339068	51339708	12.9424	2.6384	4.90541	no	-	no	no	no	no
chr1	51395146	51395281	3.1049	2.75741	1.12602	no	-	no	no	no	no
chr1	51527351	51527488	3.30991	0	0	no	-	no	no	no	no
chr1	51540403	51540523	0	3.25778	0	no	-	no	no	no	no
chr1	51649160	51649295	0	3.53891	0	no	-	no	no	no	no
chr1	51655007	51655124	0	3.52809	0	no	-	no	no	no	no
chr1	51655147	51655505	7.93475	3.54047	2.24116	no	-	no	no	no	no
chr1	51657953	51658232	8.66956	4.81576	1.80025	no	-	no	no	no	no
chr1	51657998	51658417	0	7.2382	0	no	-	no	no	no	no
chr1	51762436	51762861	6.89978	2.41273	2.85974	no	-	no	no	no	no
chr1	51762456	51762775	0	2.99763	0	no	-	no	no	no	no
chr1	51779137	51779254	0	4.74911	0	no	-	yes	no	no	no
chr1	51779961	51780084	3.72611	0	0	no	-	no	no	no	no
chr1	51796265	51796412	4.25841	0	0	no	-	no	no	no	no
chr1	51806389	51806548	0	3.52809	0	no	-	no	no	no	no
chr1	51826510	51826625	4.09866	0	0	no	-	no	no	no	no
chr1	51831610	51831756	0	2.41273	0	no	-	no	no	no	no
chr1	51832548	51832675	3.06251	0	0	no	-	no	no	no	no
chr1	51861363	51861478	3.34564	0	0	no	-	no	no	no	no
chr1	51872270	51872417	3.08947	0	0	no	-	no	no	no	no
chr1	51954234	51954382	3.08947	0	0	no	-	no	no	no	no
chr1	51978813	51978930	0	3.98609	0	no	-	no	no	no	no
chr1	52000513	52000667	0	4.21501	0	no	-	no	no	no	no
chr1	52000613	52000992	10.1511	3.28235	3.09264	no	-	no	no	no	no
chr1	52032531	52032646	3.40738	0	0	no	-	no	no	no	no
chr1	52034995	52035114	3.68406	0	0	no	-	no	no	no	no
chr1	52049139	52049258	4.09866	0	0	no	-	no	no	no	no
chr1	52093229	52093768	0	6.17416	0	no	-	no	no	no	no
chr1	52124844	52125010	0	4.40254	0	no	-	no	no	no	no
chr1	52181243	52181358	3.58633	0	0	no	-	no	no	no	no
chr1	52234604	52234911	7.10948	4.22143	1.68414	no	-	no	no	no	no
chr1	52234724	52234916	0	3.85708	0	no	-	no	no	no	no
chr1	52237100	52237244	2.64812	0	0	no	-	yes	no	no	no
chr1	52253483	52253629	0	3.10209	0	no	-	no	no	no	no
chr1	52266164	52266296	0	3.08708	0	no	-	no	no	no	no
chr1	52286818	52286935	0	4.00097	0	no	-	no	no	no	no
chr1	52309129	52309281	0	3.44789	0	no	-	no	no	no	no
chr1	52316044	52316161	0	4.2687	0	no	-	no	no	no	no
chr1	52316334	52316466	3.53082	3.08708	1.14374	no	-	no	no	no	no
chr1	52358779	52358894	4.17701	0	0	no	-	no	no	no	no
chr1	52362526	52362797	6.16551	2.93896	2.09785	no	-	no	no	no	no
chr1	52362594	52362797	0	4.02107	0	no	-	no	no	no	no
chr1	52423410	52423558	0	3.91337	0	no	-	no	no	no	no
chr1	52440266	52440383	0	2.26306	0	no	-	no	no	no	no
chr1	52463588	52463722	3.46381	0	0	no	-	no	no	no	no
chr1	52468024	52468246	0	2.64545	0	no	-	no	no	no	no
chr1	52468058	52468261	6.17894	3.02916	2.03982	no	-	no	no	no	no
chr1	52515641	52515779	2.7585	3.08708	0.893563	no	-	no	no	no	no
chr1	52537356	52537521	3.53082	0	0	no	-	no	no	no	no
chr1	52547295	52547427	0	3.81385	0	no	-	no	no	no	no
chr1	52588886	52589003	0	3.36285	0	no	-	no	no	no	no
chr1	52593071	52593443	5.17484	3.83804	1.3483	no	-	no	no	no	no
chr1	52593236	52593628	0	2.89588	0	no	-	yes	no	no	no
chr1	52603016	52603179	3.18141	0	0	no	-	no	no	no	no
chr1	52607578	52607845	7.0791	4.44909	1.59113	yes	ZFYVE9	no	no	no	no
chr1	52694481	52694596	3.27028	0	0	no	-	no	no	no	no
chr1	52704604	52704771	0	2.6384	0	no	-	no	no	no	no
chr1	52716178	52716295	0	2.75741	0	no	-	no	no	no	no
chr1	52718639	52718762	0	3.01196	0	no	-	no	no	no	no
chr1	52761960	52762277	0	3.54047	0	no	-	no	no	no	no
chr1	52762022	52762226	5.68091	3.08708	1.84022	no	-	no	no	no	no
chr1	52790024	52790151	4.09866	0	0	no	-	no	no	no	no
chr1	52800371	52800486	2.96285	0	0	no	-	no	no	no	no
chr1	52814363	52814545	3.55962	7.49544	0.474905	no	-	no	no	no	no
chr1	52870550	52870708	3.97218	0	0	yes	PRPF38A	no	no	no	no
chr1	52873198	52873313	3.95047	0	0	no	-	no	no	no	no
chr1	52901096	52901213	0	3.08708	0	no	-	no	no	no	no
chr1	52905671	52905865	3.53082	0	0	no	-	no	no	no	no
chr1	52980938	52981055	0	2.41273	0	no	-	yes	no	no	no
chr1	53006244	53006373	0	3.1912	0	no	-	no	no	no	no
chr1	53018288	53018569	3.5203	0	0	yes	ZCCHC11	no	no	no	no
chr1	53035509	53035624	2.64812	0	0	no	-	no	no	no	no
chr1	53077429	53077546	0	4.17217	0	no	-	no	no	no	no
chr1	53077972	53078087	3.30991	0	0	no	-	no	no	no	no
chr1	53092724	53092904	0	3.32303	0	no	-	no	no	no	no
chr1	53097471	53097616	0	3.55387	0	no	-	no	no	no	no
chr1	53110730	53110871	3.77019	0	0	no	-	no	no	no	no
chr1	53124390	53124505	3.86156	3.61182	1.06915	no	-	no	no	no	no
chr1	53124409	53124533	0	3.72328	0	no	-	no	no	no	no
chr1	53132213	53132328	2.9614	3.9691	0.746114	no	-	no	no	no	no
chr1	53145230	53145345	2.64812	0	0	no	-	no	no	no	no
chr1	53151946	53152145	5.9257	2.41273	2.45601	no	-	yes	no	no	yes
chr1	53157617	53157846	2.41492	0	0	no	-	no	no	no	no
chr1	53213924	53214274	4.79071	5.97617	0.801635	no	-	no	no	no	no
chr1	53257700	53258001	0	2.83171	0	no	-	no	no	no	no
chr1	53291598	53291750	4.00938	0	0	no	-	no	no	no	no
chr1	53308380	53308529	3.79488	0	0	yes	ZYG11A	no	no	no	no
chr1	53316956	53317071	3.29659	0	0	no	-	no	no	no	no
chr1	53353369	53353508	3.72611	0	0	no	-	no	no	no	no
chr1	53372969	53373084	3.29659	0	0	no	-	no	no	no	no
chr1	53379309	53379424	3.08947	0	0	no	-	no	no	no	no
chr1	53387239	53387701	0	4.22143	0	yes	ECHDC2	no	no	no	no
chr1	53387356	53387592	4.32235	5.51719	0.783433	yes	ECHDC2	no	no	no	no
chr1	53480576	53480751	0	3.08708	0	yes	SCP2	no	no	no	no
chr1	53489378	53489585	2.96285	0	0	no	-	no	no	no	no
chr1	53600327	53600444	0	3.43674	0	no	-	no	no	no	no
chr1	53601569	53601686	0	2.93896	0	no	-	no	no	no	no
chr1	53603501	53603652	3.81262	0	0	no	-	no	no	no	no
chr1	53615581	53615787	0	4.11455	0	no	-	no	no	no	no
chr1	53621042	53621157	3.13276	0	0	no	-	no	no	no	no
chr1	53642419	53642616	0	3.02916	0	no	-	no	no	no	no
chr1	53646486	53646603	0	3.08708	0	no	-	yes	no	no	no
chr1	53647728	53648023	0	3.26901	0	no	-	no	no	no	yes
chr1	53647746	53647925	5.09695	2.72755	1.86869	no	-	no	no	no	yes
chr1	53678982	53679099	0	4.52416	0	no	-	no	no	no	no
chr1	53682638	53682775	4.19304	0	0	no	-	no	no	no	no
chr1	53685324	53685562	0	4.44909	0	no	-	no	no	no	yes
chr1	53711767	53711989	0	3.78645	0	no	-	no	no	no	no
chr1	53731805	53732015	3.97392	0	0	no	-	no	no	no	no
chr1	53743924	53744293	6.48352	2.98809	2.16979	no	-	no	no	no	no
chr1	53743965	53744266	0	3.08708	0	no	-	no	no	no	no
chr1	53769479	53769594	2.56166	0	0	no	-	no	no	no	no
chr1	53794456	53794675	5.14262	0	0	no	-	no	no	no	no
chr1	53859003	53859362	0	5.29013	0	no	-	no	no	no	no
chr1	53859102	53859316	12.7992	4.00772	3.19364	no	-	no	no	no	no
chr1	53872648	53872763	3.28338	3.43674	0.955376	no	-	no	no	no	no
chr1	53909978	53910133	4.049	4.10312	0.98681	no	-	no	no	no	no
chr1	53910356	53910479	6.34022	2.57771	2.45963	no	-	no	no	no	no
chr1	53915975	53916216	7.71671	3.44676	2.23883	no	-	no	no	no	no
chr1	53925866	53925981	3.2063	0	0	yes	DMRTB1	no	no	no	no
chr1	53939263	53939404	3.39797	3.85708	0.88097	no	-	no	no	no	no
chr1	53950942	53951529	9.34441	3.85708	2.42266	no	-	no	no	no	no
chr1	53988754	53988869	2.41492	0	0	no	-	no	no	no	no
chr1	54019686	54019810	0	3.8451	0	no	-	no	no	no	no
chr1	54052759	54052943	3.25728	0	0	no	-	no	no	no	no
chr1	54058452	54058567	3.23159	0	0	no	-	no	no	no	no
chr1	54088280	54088440	0	4.27188	0	no	-	no	no	no	no
chr1	54110590	54110716	0	3.61182	0	no	-	yes	no	no	no
chr1	54119354	54119471	0	3.9691	0	no	-	no	no	no	no
chr1	54140325	54140464	4.12965	0	0	no	-	no	no	no	no
chr1	54147928	54148127	3.08947	4.11455	0.750865	no	-	no	no	no	no
chr1	54148057	54148208	0	3.08118	0	no	-	no	no	no	no
chr1	54181173	54181514	0	2.93503	0	no	-	no	no	no	no
chr1	54181183	54181360	5.01845	6.46571	0.776164	no	-	no	no	no	no
chr1	54220475	54220769	6.54335	3.52675	1.85535	no	-	no	no	no	no
chr1	54220834	54220949	3.53082	5.29013	0.667435	no	-	no	no	no	no
chr1	54262809	54262927	2.75991	0	0	no	-	no	no	no	no
chr1	54268106	54268221	3.44045	0	0	no	-	yes	no	no	no
chr1	54292074	54292259	2.91832	0	0	no	-	no	no	no	no
chr1	54318583	54318789	3.97218	0	0	no	-	yes	no	no	no
chr1	54326529	54326905	0	4.27768	0	no	-	no	no	no	no
chr1	54326546	54326893	6.96378	3.37886	2.06099	no	-	no	no	no	no
chr1	54344098	54344518	7.94435	3.08708	2.57342	no	-	no	no	no	no
chr1	54388155	54388280	2.89201	0	0	no	-	no	no	no	no
chr1	54412222	54412338	2.42746	3.11171	0.780105	yes	LRRC42	yes	no	no	no
chr1	54414861	54415016	3.68113	0	0	no	-	no	no	no	no
chr1	54425351	54425651	7.58976	8.81688	0.860822	no	-	no	no	no	no
chr1	54464705	54464820	4.04111	0	0	no	-	no	no	no	no
chr1	54483841	54483956	3.25728	0	0	yes	LDLRAD1	no	no	no	no
chr1	54535807	54536111	7.64543	5.29214	1.44468	no	-	no	no	no	no
chr1	54547276	54547663	0	4.13122	0	no	-	no	no	no	no
chr1	54547356	54547718	9.7387	7.6413	1.27448	no	-	no	no	no	no
chr1	54553913	54554093	3.44717	0	0	no	-	no	no	no	no
chr1	54586826	54586941	2.95218	0	0	no	-	yes	no	no	no
chr1	54587206	54587560	9.84059	5.73315	1.71644	no	-	no	no	no	no
chr1	54588676	54588791	3.49457	0	0	no	-	no	no	no	no
chr1	54591568	54591735	4.13987	5.29013	0.782565	no	-	no	no	no	yes
chr1	54626325	54626453	3.5203	0	0	no	-	no	no	no	no
chr1	54647451	54647686	4.81379	3.8451	1.25193	no	-	no	no	no	no
chr1	54678359	54678476	0	3.4242	0	no	-	no	no	no	no
chr1	54703103	54703220	0	2.98809	0	no	-	no	no	no	no
chr1	54703497	54703635	0	3.23532	0	no	-	no	no	no	no
chr1	54709381	54709521	0	3.67219	0	no	-	no	no	no	no
chr1	54726324	54726441	0	4.00772	0	no	-	no	no	no	no
chr1	54739280	54739486	3.08947	0	0	no	-	no	no	no	no
chr1	54743639	54743760	0	3.43674	0	no	-	no	no	no	no
chr1	54750605	54750776	0	4.10312	0	no	-	no	no	no	no
chr1	54753713	54753828	3.14922	0	0	no	-	no	no	no	yes
chr1	54776638	54776927	5.51983	3.16608	1.74343	no	-	no	no	no	no
chr1	54776699	54776904	0	2.57771	0	no	-	no	no	no	no
chr1	54800165	54800294	4.36936	0	0	no	-	no	no	no	no
chr1	54818222	54818393	0	3.77561	0	no	-	no	no	no	no
chr1	54826052	54826196	0	3.85708	0	no	-	no	no	no	no
chr1	54836906	54837048	0	3.85708	0	no	-	no	no	no	no
chr1	54837288	54837403	2.96285	2.82883	1.04738	no	-	no	no	no	no
chr1	54842493	54842684	0	3.6649	0	no	-	yes	no	no	no
chr1	54857337	54857456	0	2.64607	0	no	-	no	no	no	no
chr1	54860211	54860332	4.00844	0	0	no	-	yes	no	no	no
chr1	54872255	54872451	3.55231	0	0	no	-	no	no	no	no
chr1	54953808	54953933	0	3.08708	0	no	-	no	no	no	no
chr1	54955025	54955342	0	4.11455	0	no	-	no	no	no	no
chr1	54955168	54955468	11.2533	3.52675	3.19085	no	-	no	no	no	no
chr1	54985478	54985609	0	3.52675	0	no	-	no	no	no	no
[truncated: 69,994 more rows]
