# Supplementary material for: Epigenome-wide effects of vitamin D and their impact on the transcriptome of human monocytes involve CTCF
Source: Oxford University Press journal article supplement (doi:10.1093/nar/gkv1519), 2015-12-28
Supplement: gkv1519_Supplementary_Data.zip [file gkv1519_Supplementary_Data.zip › nar-01887-x-2015-File010.xlsx]

## Sheet: Sheet1
gene	locus	Av EtOH (2.5 h)	Av 1,25D (2.5 h)	log FC (2.5 h)	p value (2.5 h)	q value (2.5 h)	sig? (2.5 h)	Av EtOH (4 h)	Av 1,25D (4 h)	log FC (4 h)	p value (4 h)	q value (4 h)	sig? (4 h)	Av EtOH (24 h)	Av 1,25D (24 h)	log FC (24 h)	p value (24 h)	q value (24 h)	sig? (24 h)
ARHGEF2	chr1:155916629-155948336	91.4066	146.397	0.679515	5e-05	0.0171976	yes	90.4143	157.949	0.804832	5e-05	0.00358934	yes	87.5981	169.776	0.954657	5e-05	0.00120857	yes
G0S2	chr1:209848669-209849735	6.53933	19.0713	1.54419	5e-05	0.0171976	yes	6.19726	21.2147	1.77536	5e-05	0.00358934	yes	5.7766	91.072	3.97872	5e-05	0.00120857	yes
THEMIS2	chr1:28199054-28213193	16.5101	28.934	0.809416	5e-05	0.0171976	yes	17.4443	31.0221	0.830546	5e-05	0.00358934	yes	13.2035	67.7914	2.36018	5e-05	0.00120857	yes
PDZD7	chr10:102756863-102790914	13.7036	31.866	1.21746	0.0001	0.0306565	yes	14.7702	54.4305	1.88173	5e-05	0.00358934	yes	15.19	91.8445	2.59607	5e-05	0.00120857	yes
SFXN3	chr10:102790995-102800998	47.4815	83.8001	0.819588	5e-05	0.0171976	yes	52.1222	99.7905	0.937005	5e-05	0.00358934	yes	46.7273	91.8449	0.974934	5e-05	0.00120857	yes
USP2	chr11:119225924-119252436	4.56648	10.1735	1.15566	5e-05	0.0171976	yes	5.02666	13.126	1.38475	5e-05	0.00358934	yes	4.75131	20.9814	2.14271	5e-05	0.00120857	yes
ROBO4	chr11:124754113-124767831	0.441605	1.19664	1.43816	5e-05	0.0171976	yes	0.389179	2.53859	2.70552	5e-05	0.00358934	yes	0.382621	9.8572	4.68719	5e-05	0.00120857	yes
SLC37A2	chr11:124933012-124960412	9.41904	25.1858	1.41896	5e-05	0.0171976	yes	10.0752	30.547	1.60022	5e-05	0.00358934	yes	7.27122	78.9762	3.44115	5e-05	0.00120857	yes
ABCD2	chr12:39945021-40013843	0.118259	0.474967	2.00588	5e-05	0.0171976	yes	0.107863	0.596817	2.46809	5e-05	0.00358934	yes	0.130332	1.98072	3.92576	5e-05	0.00120857	yes
NFE2	chr12:54685890-54694821	19.3846	33.4831	0.788523	5e-05	0.0171976	yes	19.4254	38.3968	0.983043	5e-05	0.00358934	yes	21.4375	54.0225	1.33342	5e-05	0.00120857	yes
KCTD12	chr13:77454303-77460540	4.20132	7.93905	0.918122	5e-05	0.0171976	yes	3.56184	8.51037	1.2566	5e-05	0.00358934	yes	3.65301	40.5291	3.4718	5e-05	0.00120857	yes
DPF3	chr14:73136659-73360809	0.539639	1.43248	1.40845	0.0001	0.0306565	yes	0.476398	1.31622	1.46616	5e-05	0.00358934	yes	0.43051	4.19939	3.28606	5e-05	0.00120857	yes
CLMN	chr14:95648275-95786245	0.197902	0.581816	1.55578	5e-05	0.0171976	yes	0.202613	1.11452	2.45962	5e-05	0.00358934	yes	0.257992	6.42838	4.63906	5e-05	0.00120857	yes
EFTUD1	chr15:82422560-82555104	6.09104	10.3957	0.771233	5e-05	0.0171976	yes	5.34154	12.6324	1.2418	5e-05	0.00358934	yes	5.50842	28.0941	2.35056	5e-05	0.00120857	yes
FOXF1	chr16:86544132-86548070	0.782163	1.78541	1.19071	5e-05	0.0171976	yes	0.766627	1.61225	1.07247	5e-05	0.00358934	yes	0.637578	4.27429	2.74501	5e-05	0.00120857	yes
LRRC25	chr19:18501953-18508415	3.44578	8.41686	1.28845	5e-05	0.0171976	yes	3.35325	9.70166	1.53267	5e-05	0.00358934	yes	2.70544	21.314	2.97787	5e-05	0.00120857	yes
SEMA6B	chr19:4542599-4559771	3.04573	14.1068	2.21153	5e-05	0.0171976	yes	3.44009	19.616	2.51152	5e-05	0.00358934	yes	2.86375	55.9628	4.28849	5e-05	0.00120857	yes
KCNF1	chr2:11052062-11054351	0.837338	2.18363	1.38285	5e-05	0.0171976	yes	0.662028	3.23576	2.28914	5e-05	0.00358934	yes	0.700549	6.96645	3.31386	5e-05	0.00120857	yes
TMEM37	chr2:120189445-120196096	1.55621	5.6308	1.8553	5e-05	0.0171976	yes	1.35289	8.9217	2.72127	5e-05	0.00358934	yes	1.47666	22.7248	3.94386	5e-05	0.00120857	yes
IRS1	chr2:227596032-227663506	0.354221	0.751174	1.0845	5e-05	0.0171976	yes	0.295373	0.940107	1.67029	5e-05	0.00358934	yes	0.483154	1.84749	1.93501	5e-05	0.00120857	yes
ASAP2	chr2:9346893-9545812	7.34829	16.0888	1.13057	5e-05	0.0171976	yes	7.25046	19.0452	1.39328	5e-05	0.00358934	yes	8.45015	34.8381	2.04362	5e-05	0.00120857	yes
THBD	chr20:23026269-23030301	49.7447	107.669	1.11399	5e-05	0.0171976	yes	43.8768	139.096	1.66455	5e-05	0.00358934	yes	47.4532	325.952	2.78008	5e-05	0.00120857	yes
C20orf197	chr20:58630979-58648008	2.31678	6.03436	1.38108	5e-05	0.0171976	yes	2.44569	8.27827	1.75909	5e-05	0.00358934	yes	2.75524	12.1837	2.1447	5e-05	0.00120857	yes
CYTH4	chr22:37678494-37711389	43.8735	68.5127	0.643021	5e-05	0.0171976	yes	49.6052	77.1231	0.636671	5e-05	0.00358934	yes	47.908	92.9828	0.956697	5e-05	0.00120857	yes
DENND6B	chr22:50750391-50765489	8.79832	14.8643	0.756546	5e-05	0.0171976	yes	9.45943	24.6419	1.38129	5e-05	0.00358934	yes	9.38644	98.0466	3.38482	5e-05	0.00120857	yes
FAM43A	chr3:194406621-194409766	17.9569	28.2308	0.652731	0.0001	0.0306565	yes	16.7815	35.7003	1.08906	5e-05	0.00358934	yes	16.7117	53.2417	1.6717	5e-05	0.00120857	yes
CCR1	chr3:46243199-46249832	26.6322	47.4468	0.833141	5e-05	0.0171976	yes	27.8437	48.9105	0.812793	5e-05	0.00358934	yes	31.14	75.8557	1.28449	5e-05	0.00120857	yes
CAMP	chr3:48264836-48266981	0.523679	5.04027	3.26675	0.0001	0.0306565	yes	0.479013	10.0525	4.39134	5e-05	0.00358934	yes	0.803669	87.5245	6.76694	5e-05	0.00120857	yes
POU4F2	chr4:147560044-147563623	1.52417	2.83301	0.89431	0.0001	0.0306565	yes	1.36476	3.22683	1.24147	5e-05	0.00358934	yes	1.8786	6.39369	1.76699	5e-05	0.00120857	yes
PDLIM4	chr5:131593350-131609147	3.98244	7.80403	0.970565	5e-05	0.0171976	yes	4.1831	11.5992	1.47138	5e-05	0.00358934	yes	3.56283	22.7091	2.67218	5e-05	0.00120857	yes
HBEGF	chr5:139712427-139726188	5.65934	23.1768	2.03398	5e-05	0.0171976	yes	6.13815	23.4886	1.93609	5e-05	0.00358934	yes	4.58379	29.3131	2.67693	5e-05	0.00120857	yes
CD14	chr5:140011312-140013286	4.46592	20.2992	2.1844	5e-05	0.0171976	yes	4.24499	23.8668	2.49117	5e-05	0.00358934	yes	2.30376	215.476	6.54739	5e-05	0.00120857	yes
PPARGC1B	chr5:149109814-149234585	1.59526	3.26939	1.03523	5e-05	0.0171976	yes	1.66556	3.83635	1.20373	5e-05	0.00358934	yes	1.71199	11.8452	2.79056	5e-05	0.00120857	yes
ELL2	chr5:95220801-95297775	4.02904	6.77028	0.748781	5e-05	0.0171976	yes	3.57369	7.23114	1.01681	5e-05	0.00358934	yes	3.63435	11.4898	1.66059	5e-05	0.00120857	yes
MARCKS	chr6:114178526-114184652	9.38271	15.3982	0.714689	5e-05	0.0171976	yes	8.60752	19.8745	1.20725	5e-05	0.00358934	yes	11.0746	41.1917	1.8951	5e-05	0.00120857	yes
TRIM38	chr6:25962916-25987557	5.3696	9.37363	0.803795	5e-05	0.0171976	yes	5.43733	8.89693	0.71041	5e-05	0.00358934	yes	5.13467	11.1917	1.12409	5e-05	0.00120857	yes
FANCE	chr6:35420137-35434881	16.5608	27.3532	0.72394	5e-05	0.0171976	yes	18.5731	35.4412	0.932214	5e-05	0.00358934	yes	19.4991	72.1264	1.88712	5e-05	0.00120857	yes
TREM1	chr6:41242998-41254457	1.28382	3.93032	1.61421	5e-05	0.0171976	yes	1.42858	4.19231	1.55317	5e-05	0.00358934	yes	0.664002	19.4815	4.87477	5e-05	0.00120857	yes
NCF1B	chr7:72634673-72649979	2.29386	4.6208	1.01037	5e-05	0.0171976	yes	3.63453	5.52864	0.605157	0.0001	0.00670237	yes	3.12076	15.1499	2.27933	5e-05	0.00120857	yes
LRRC8A	chr9:131644390-131680317	7.80759	16.5315	1.08227	5e-05	0.0171976	yes	7.97831	17.3966	1.12465	5e-05	0.00358934	yes	7.74158	26.6932	1.78577	5e-05	0.00120857	yes
CD274	chr9:5450502-5470567	0.190722	0.959369	2.33061	5e-05	0.0171976	yes	0.148058	1.15249	2.96052	5e-05	0.00358934	yes	0.108137	2.73377	4.65996	5e-05	0.00120857	yes
FGD3	chr9:95709600-95798518	20.139	33.5091	0.734563	5e-05	0.0171976	yes	20.5239	40.0473	0.964396	5e-05	0.00358934	yes	21.3643	51.0344	1.25627	5e-05	0.00120857	yes
NINJ1	chr9:95883770-95896570	28.6246	87.452	1.61124	5e-05	0.0171976	yes	30.5326	114.187	1.90298	5e-05	0.00358934	yes	21.9786	176.385	3.00456	5e-05	0.00120857	yes
FBP1	chr9:97365420-97402531	10.3215	20.5824	0.995759	5e-05	0.0171976	yes	10.7758	37.8047	1.81077	5e-05	0.00358934	yes	9.86704	511.955	5.69725	5e-05	0.00120857	yes
DDX26B	chrX:134654554-134716460	10.6776	17.4963	0.712465	5e-05	0.0171976	yes	11.8302	19.409	0.714251	5e-05	0.00358934	yes	12.2932	25.7065	1.06427	5e-05	0.00120857	yes
TBX15	chr1:119425665-119532179	1.51487	2.91388	0.943748	5e-05	0.0171976	yes	1.88157	2.36794	0.331694	0.0249	0.513317	no	1.18822	3.13067	1.39767	5e-05	0.00120857	yes
PDE4DIP	chr1:144851423-145076186	4.02011	5.75574	0.517766	0.0035	0.601915	no	3.76417	5.64748	0.585274	5e-05	0.00358934	yes	3.79212	6.2203	0.713978	0.0001	0.00223912	yes
PLEKHO1	chr1:150122169-150131825	29.2414	46.039	0.654844	0.0002	0.0587583	no	30.6176	47.7439	0.640954	5e-05	0.00358934	yes	29.793	65.5097	1.13673	5e-05	0.00120857	yes
RPRD2	chr1:150336989-150449041	11.0755	13.3512	0.269599	0.08425	0.999863	no	10.0138	14.081	0.49176	0.0001	0.00670237	yes	10.3733	18.1684	0.808566	5e-05	0.00120857	yes
SHE	chr1:154451953-154474526	1.02814	1.67206	0.701586	0.0009	0.222663	no	0.948326	2.0233	1.09326	5e-05	0.00358934	yes	1.0762	9.33014	3.11595	5e-05	0.00120857	yes
TDRD10	chr1:154474694-154520623	0.898091	1.43775	0.678876	0.01355	0.999863	no	1.09634	2.02126	0.88256	5e-05	0.00358934	yes	1.05803	8.64869	3.0311	5e-05	0.00120857	yes
RGS16	chr1:182567757-182573548	3.29289	2.76455	-0.25231	0.2301	0.999863	no	3.74464	2.49304	-0.586922	0.00015	0.009428	yes	5.82291	2.30028	-1.33993	5e-05	0.00120857	yes
NMNAT2	chr1:183217371-183387634	0.414103	0.688188	0.732814	0.0054	0.84612	no	0.381546	0.633843	0.732268	5e-05	0.00358934	yes	0.3874	1.39373	1.84705	5e-05	0.00120857	yes
BTG2	chr1:203274663-203278729	46.3899	45.2399	-0.0362165	0.8152	0.999863	no	49.0609	34.2545	-0.518281	5e-05	0.00358934	yes	37.4748	24.3449	-0.622304	0.0002	0.004127	yes
TRAF3IP3	chr1:209929393-209957890	23.7311	28.7741	0.277991	0.1015	0.999863	no	23.7351	32.8038	0.466843	0.00015	0.009428	yes	25.7425	59.9735	1.22017	5e-05	0.00120857	yes
ATF3	chr1:212738675-212794119	4.41913	4.31157	-0.0355478	0.8636	0.999863	no	5.1687	3.12133	-0.727642	5e-05	0.00358934	yes	4.34674	2.45175	-0.826125	0.0005	0.0086261	yes
PTPN14	chr1:214522038-214725024	2.93692	2.68706	-0.12828	0.43815	0.999863	no	3.06509	2.07013	-0.566212	5e-05	0.00358934	yes	2.17986	0.997143	-1.12836	5e-05	0.00120857	yes
PGBD5	chr1:230457391-230561674	3.01648	3.56494	0.241013	0.2223	0.999863	no	2.8146	3.92293	0.479004	0.0004	0.0223589	yes	3.14337	5.62966	0.840733	5e-05	0.00120857	yes
KIAA1804	chr1:233463513-233520894	8.82807	11.3701	0.365068	0.02485	0.999863	no	8.38798	11.9995	0.516585	5e-05	0.00358934	yes	9.34878	17.3428	0.89149	5e-05	0.00120857	yes
FUCA1	chr1:24171571-24194859	4.51274	6.82192	0.596176	0.00245	0.466891	no	4.14853	7.92476	0.933767	5e-05	0.00358934	yes	4.15189	14.1946	1.7735	5e-05	0.00120857	yes
ZDHHC18	chr1:27153200-27182211	10.0198	13.3529	0.414302	0.0156	0.999863	no	10.5356	14.6754	0.478123	0.0001	0.00670237	yes	8.8673	23.3515	1.39695	5e-05	0.00120857	yes
XKR8	chr1:28286503-28294604	5.00554	6.76247	0.434023	0.02565	0.999863	no	5.29147	8.01444	0.598931	5e-05	0.00358934	yes	4.75574	10.4559	1.13657	5e-05	0.00120857	yes
PTAFR	chr1:28473676-28520447	1.45167	2.26541	0.642061	0.00205	0.418972	no	1.34718	2.38364	0.823218	5e-05	0.00358934	yes	1.27277	5.99341	2.2354	5e-05	0.00120857	yes
SERINC2	chr1:31882411-31907527	19.1245	23.9612	0.325279	0.05145	0.999863	no	19.5385	32.8062	0.747652	5e-05	0.00358934	yes	19.0619	141.987	2.89699	5e-05	0.00120857	yes
ARHGEF16	chr1:3371146-3397677	1.53019	1.82665	0.255493	0.25915	0.999863	no	1.54058	2.2881	0.570678	5e-05	0.00358934	yes	1.27564	4.0722	1.67458	5e-05	0.00120857	yes
AKIRIN1	chr1:39456915-39471737	34.178	47.3068	0.468982	0.0025	0.470067	no	33.5813	48.6922	0.536034	5e-05	0.00358934	yes	31.9018	59.584	0.901287	5e-05	0.00120857	yes
CITED4	chr1:41326727-41328018	653.402	803.575	0.298462	0.0583	0.999863	no	743.982	1230.06	0.725396	5e-05	0.00358934	yes	636.237	1347.56	1.08272	5e-05	0.00120857	yes
TTC39A	chr1:51752929-51810785	0.291915	0.519002	0.830191	0.02265	0.999863	no	0.216792	0.572436	1.40081	5e-05	0.00358934	yes	0.20655	1.39202	2.75262	5e-05	0.00120857	yes
IFI44L	chr1:79086087-79111830	1.48701	1.51882	0.0305328	0.88565	0.999863	no	1.40781	0.815916	-0.786961	5e-05	0.00358934	yes	0.940294	0.414729	-1.18094	5e-05	0.00120857	yes
IFI44	chr1:79115476-79129763	6.75019	7.65453	0.181385	0.3503	0.999863	no	8.29863	4.45745	-0.896656	5e-05	0.00358934	yes	3.41676	1.99192	-0.778471	0.00335	0.0399925	yes
F3	chr1:94994731-95007413	46.0695	37.0835	-0.313037	0.05255	0.999863	no	46.6264	30.257	-0.623879	5e-05	0.00358934	yes	53.0052	16.6107	-1.67402	5e-05	0.00120857	yes
GRK5	chr10:120967196-121215131	1.30486	1.85955	0.511052	0.03435	0.999863	no	1.5	2.31729	0.627479	5e-05	0.00358934	yes	1.59199	3.9592	1.31438	5e-05	0.00120857	yes
PTPRE	chr10:129705324-129884164	13.5996	12.6337	-0.106288	0.50815	0.999863	no	14.2779	10.7375	-0.411129	0.00035	0.0197199	yes	13.3003	8.77827	-0.599448	0.00035	0.00647074	yes
NCOA4	chr10:51565107-51590734	57.1512	65.1135	0.188173	0.22205	0.999863	no	48.9397	68.2422	0.479659	5e-05	0.00358934	yes	55.6611	158.72	1.51174	5e-05	0.00120857	yes
CHST3	chr10:73724119-73773322	1.36729	1.78415	0.383916	0.0502	0.999863	no	1.3049	1.8205	0.480396	0.0007	0.0357379	yes	1.12228	1.82819	0.703983	0.00045	0.00792336	yes
GLUD1P3	chr10:75491298-75495367	3.82976	3.48598	-0.135689	0.4727	0.999863	no	4.68135	3.14658	-0.573143	5e-05	0.00358934	yes	3.44487	2.15663	-0.675671	0.00095	0.0148707	yes
IFIT2	chr10:91061705-91069033	4.83932	5.34773	0.144122	0.43455	0.999863	no	5.17419	3.34263	-0.630352	5e-05	0.00358934	yes	3.48371	2.05308	-0.762837	0.0005	0.0086261	yes
IFIT3	chr10:91087601-91100725	8.31941	8.26538	-0.00939954	0.96025	0.999863	no	8.47629	5.70514	-0.571171	5e-05	0.00358934	yes	5.56975	2.99541	-0.89486	5e-05	0.00120857	yes
IFIT1	chr10:91152302-91166244	2.76684	2.71365	-0.0280015	0.8851	0.999863	no	2.81413	1.59193	-0.82191	5e-05	0.00358934	yes	1.86035	0.823493	-1.17574	5e-05	0.00120857	yes
FRAT1	chr10:99079021-99081672	8.68705	12.2219	0.492528	0.00465	0.744712	no	9.57059	15.8879	0.731248	5e-05	0.00358934	yes	10.0669	17.763	0.819255	5e-05	0.00120857	yes
FXYD6	chr11:117690789-117748201	2.81523	4.26741	0.600108	0.0064	0.991789	no	3.24554	5.07917	0.646136	5e-05	0.00358934	yes	2.81386	13.2181	2.23189	5e-05	0.00120857	yes
BCL9L	chr11:118754474-118781613	5.12277	6.16241	0.266571	0.0997	0.999863	no	4.97956	6.73394	0.435432	0.00035	0.0197199	yes	4.20775	8.68153	1.0449	5e-05	0.00120857	yes
CDON	chr11:125826712-125933187	1.71614	2.28446	0.412688	0.0237	0.999863	no	1.61407	2.64848	0.714464	5e-05	0.00358934	yes	1.70369	3.59211	1.07617	5e-05	0.00120857	yes
CD44	chr11:35160416-35253949	34.8596	33.0392	-0.077377	0.6236	0.999863	no	36.7672	28.4117	-0.371933	0.00095	0.0464875	yes	34.5932	18.9352	-0.869416	5e-05	0.00120857	yes
TRIM22	chr11:5710816-5732093	10.5712	10.2163	-0.0492763	0.7766	0.999863	no	10.5631	7.38692	-0.51599	5e-05	0.00358934	yes	7.62256	5.21291	-0.548185	0.00305	0.0372896	yes
MPEG1	chr11:58939811-58980494	11.5693	9.32978	-0.310387	0.0828	0.999863	no	10.0749	6.60438	-0.609277	5e-05	0.00358934	yes	7.79454	3.18698	-1.29027	5e-05	0.00120857	yes
MS4A7	chr11:60145957-60163426	68.6862	55.5279	-0.306807	0.0517	0.999863	no	65.6983	44.0238	-0.57757	5e-05	0.00358934	yes	71.8332	19.2521	-1.89964	5e-05	0.00120857	yes
MS4A14	chr11:60163486-60185228	16.7385	14.055	-0.252089	0.12125	0.999863	no	17.6162	12.1129	-0.54036	5e-05	0.00358934	yes	20.6121	6.79262	-1.60145	5e-05	0.00120857	yes
NT5DC3	chr12:104166080-104234975	3.54577	5.42955	0.614735	0.0005	0.135596	no	3.77379	6.0181	0.673294	5e-05	0.00358934	yes	4.17525	6.96933	0.739156	5e-05	0.00120857	yes
SSH1	chr12:109176465-109251359	4.59211	6.50729	0.502897	0.0029	0.531114	no	4.62289	6.50193	0.492073	0.00015	0.009428	yes	4.48583	8.39293	0.903798	5e-05	0.00120857	yes
OAS3	chr12:113376248-113411054	9.38585	10.0999	0.105778	0.51245	0.999863	no	8.88644	6.15975	-0.528733	5e-05	0.00358934	yes	6.23168	3.93143	-0.664567	0.00015	0.00324194	yes
OAS2	chr12:113416273-113449528	27.0794	26.8447	-0.0125566	0.9363	0.999863	no	26.1533	18.2405	-0.519843	5e-05	0.00358934	yes	16.351	9.21573	-0.827213	0.0001	0.00223912	yes
VPS37B	chr12:123349874-123380712	15.7526	19.3957	0.300146	0.06785	0.999863	no	15.4451	20.6261	0.417323	0.00035	0.0197199	yes	14.9125	27.7224	0.894532	5e-05	0.00120857	yes
NCOR2	chr12:124808956-125052010	23.377	26.8404	0.199315	0.18925	0.999863	no	23.3381	34.272	0.554347	5e-05	0.00358934	yes	22.4204	39.6914	0.824016	5e-05	0.00120857	yes
PRICKLE1	chr12:42852139-42983572	6.93211	8.77549	0.340185	0.0445	0.999863	no	6.31913	9.54316	0.59474	5e-05	0.00358934	yes	6.3221	13.3204	1.07516	5e-05	0.00120857	yes
ACVRL1	chr12:52301201-52317145	5.13891	6.44266	0.326193	0.0623	0.999863	no	5.13042	7.76562	0.598025	5e-05	0.00358934	yes	4.48242	12.1124	1.43414	5e-05	0.00120857	yes
TESPA1	chr12:55342086-55378530	0.648931	0.985489	0.602775	0.0182	0.999863	no	0.686792	1.28728	0.906377	5e-05	0.00358934	yes	0.620285	3.36769	2.44075	5e-05	0.00120857	yes
LRP1	chr12:57522281-57607125	1.07261	1.24216	0.211725	0.24865	0.999863	no	1.08017	1.44875	0.423545	0.00085	0.0426266	yes	1.32731	2.6686	1.00758	5e-05	0.00120857	yes
CD9	chr12:6309481-6347437	5.92605	7.07716	0.256099	0.22355	0.999863	no	6.78311	4.69034	-0.532256	0.00025	0.0149809	yes	5.60801	2.54108	-1.14205	5e-05	0.00120857	yes
C3AR1	chr12:8210918-8218955	10.4938	9.58989	-0.129945	0.47715	0.999863	no	12.5291	6.79412	-0.882923	5e-05	0.00358934	yes	5.92076	2.07745	-1.51097	5e-05	0.00120857	yes
RAB20	chr13:111175412-111214071	7.22369	11.1717	0.629045	0.0016	0.347126	no	9.12408	12.5823	0.463645	0.00045	0.024571	yes	8.23788	22.7819	1.46754	5e-05	0.00120857	yes
EPSTI1	chr13:43460523-43566407	3.47598	3.4212	-0.0229188	0.9077	0.999863	no	3.66788	2.20314	-0.735387	5e-05	0.00358934	yes	1.95434	1.11041	-0.815589	0.0017	0.023564	yes
PRKCH	chr14:61788514-62017698	3.49797	4.48341	0.358078	0.0572	0.999863	no	3.34219	5.70097	0.770412	5e-05	0.00358934	yes	3.28384	13.0309	1.98849	5e-05	0.00120857	yes
ZFP36L1	chr14:69254371-69262960	6.27267	5.42618	-0.209142	0.24295	0.999863	no	9.28981	5.01602	-0.889107	5e-05	0.00358934	yes	10.4064	4.90867	-1.08407	5e-05	0.00120857	yes
KLF13	chr15:31619082-31670102	19.4865	25.2147	0.371789	0.0163	0.999863	no	19.3028	26.1327	0.437045	0.0002	0.0121914	yes	18.6675	28.6716	0.619096	5e-05	0.00120857	yes
SEMA4B	chr15:90728151-90772892	5.29978	6.79596	0.358747	0.03955	0.999863	no	5.52211	8.17621	0.566212	5e-05	0.00358934	yes	5.5183	9.88161	0.840521	5e-05	0.00120857	yes
CLCN7	chr16:1494933-1525085	40.3434	47.1159	0.22388	0.1483	0.999863	no	41.218	58.8461	0.51367	5e-05	0.00358934	yes	39.6347	64.3705	0.699636	5e-05	0.00120857	yes
USP31	chr16:23072727-23160591	7.70366	6.68447	-0.204731	0.202	0.999863	no	7.88906	5.96355	-0.403683	0.0004	0.0223589	yes	7.85179	4.06881	-0.948414	5e-05	0.00120857	yes
ITGAM	chr16:31271287-31344213	12.3568	15.1254	0.291667	0.0703	0.999863	no	11.6085	16.0861	0.470641	0.00015	0.009428	yes	12.3432	70.2618	2.50903	5e-05	0.00120857	yes
CMIP	chr16:81478774-81745367	27.2982	30.4823	0.159168	0.30445	0.999863	no	26.3751	35.1003	0.41231	0.0003	0.0174593	yes	27.5734	39.53	0.519671	0.00115	0.0173082	yes
LGALS9	chr17:25958173-25976586	87.5606	108.223	0.30566	0.0544	0.999863	no	90.1477	122.268	0.439691	0.00015	0.009428	yes	78.4543	247.99	1.66036	5e-05	0.00120857	yes
CACNB1	chr17:37329708-37353956	2.35851	3.68445	0.643573	0.0022	0.430894	no	2.71271	4.38403	0.692521	5e-05	0.00358934	yes	3.18485	5.25646	0.722866	0.00035	0.00647074	yes
GJD3	chr17:38516904-38520945	3.26881	4.51781	0.466858	0.0123	0.999863	no	3.18454	5.99398	0.91243	5e-05	0.00358934	yes	3.68719	18.4263	2.32117	5e-05	0.00120857	yes
NOG	chr17:54671059-54672951	1.02285	0.709862	-0.526978	0.0924	0.999863	no	1.35925	0.682735	-0.993413	5e-05	0.00358934	yes	0.748846	0.183838	-2.02623	0.00265	0.0334761	yes
CUEDC1	chr17:55938603-56032684	6.05489	7.8128	0.367739	0.0344	0.999863	no	6.28504	10.089	0.682791	5e-05	0.00358934	yes	6.99833	12.3432	0.818638	5e-05	0.00120857	yes
XAF1	chr17:6659155-6678964	25.8026	26.4136	0.0337606	0.8313	0.999863	no	28.6727	20.6405	-0.474201	5e-05	0.00358934	yes	24.3058	12.9356	-0.909948	5e-05	0.00120857	yes
RAB37	chr17:72667255-72743474	7.13214	10.6208	0.574478	0.03755	0.999863	no	7.76644	17.0295	1.13271	5e-05	0.00358934	yes	8.73002	31.6017	1.85595	5e-05	0.00120857	yes
SOCS3	chr17:76352858-76356158	3.24018	2.7702	-0.226085	0.2764	0.999863	no	3.13293	2.1243	-0.560522	0.00015	0.009428	yes	2.71442	1.31118	-1.04978	5e-05	0.00120857	yes
NPTX1	chr17:78440632-78450404	10.2822	10.7943	0.0701238	0.675	0.999863	no	10.4982	5.13126	-1.03275	5e-05	0.00358934	yes	6.75333	0.969386	-2.80046	5e-05	0.00120857	yes
GAS7	chr17:9813925-10101868	10.8596	14.0649	0.373122	0.0177	0.999863	no	11.0834	15.9279	0.52315	5e-05	0.00358934	yes	10.1374	17.5616	0.792741	5e-05	0.00120857	yes
ONECUT2	chr18:55102916-55158530	5.27073	4.27435	-0.302299	0.05845	0.999863	no	5.13303	3.82875	-0.422939	0.00025	0.0149809	yes	6.14322	1.84767	-1.73329	5e-05	0.00120857	yes
CD97	chr19:14491955-14519537	37.5927	46.8354	0.317146	0.04195	0.999863	no	40.9115	55.7672	0.44691	0.0001	0.00670237	yes	36.9745	79.0694	1.09659	5e-05	0.00120857	yes
KLF2	chr19:16435650-16438339	13.2893	10.7183	-0.310186	0.0857	0.999863	no	17.8204	12.3663	-0.527117	0.0001	0.00670237	yes	14.3039	6.13932	-1.22026	5e-05	0.00120857	yes
MYO9B	chr19:17186590-17324104	22.0448	28.8116	0.386212	0.0108	0.999863	no	23.1046	36.0855	0.643238	5e-05	0.00358934	yes	23.458	44.653	0.928674	5e-05	0.00120857	yes
OCEL1	chr19:17337054-17340028	10.4538	12.6451	0.274552	0.1604	0.999863	no	11.2329	17.7867	0.663072	5e-05	0.00358934	yes	9.7042	23.0114	1.24567	5e-05	0.00120857	yes
ELL	chr19:18553472-18632937	9.09604	12.0288	0.403187	0.01595	0.999863	no	9.62598	14.6971	0.610527	5e-05	0.00358934	yes	8.80413	16.7227	0.925554	5e-05	0.00120857	yes
CEBPA	chr19:33790839-33793430	262.59	363.97	0.471009	0.00275	0.51027	no	257.315	405.306	0.655476	5e-05	0.00358934	yes	234.652	354.732	0.596206	0.00035	0.00647074	yes
TBXA2R	chr19:3594503-3606831	2.31148	3.54062	0.615183	0.0035	0.601915	no	2.57925	4.83216	0.905717	5e-05	0.00358934	yes	2.34556	3.9872	0.765443	0.0003	0.00576447	yes
ZFP36	chr19:39897486-39900052	109.913	162.924	0.567827	0.00045	0.124429	no	110.885	185.691	0.743841	5e-05	0.00358934	yes	106.137	197.715	0.897499	5e-05	0.00120857	yes
B3GNT8	chr19:41931263-41934635	8.04124	11.7331	0.5451	0.00295	0.533345	no	9.03451	14.5696	0.689439	5e-05	0.00358934	yes	7.38546	17.0444	1.20654	5e-05	0.00120857	yes
LRG1	chr19:4537226-4540036	41.6007	62.0126	0.575955	0.00025	0.071949	no	41.3439	65.9255	0.673163	5e-05	0.00358934	yes	35.459	90.3755	1.34978	5e-05	0.00120857	yes
VAV1	chr19:6772678-6857377	51.2033	64.9052	0.342097	0.02725	0.999863	no	50.906	72.7503	0.515119	5e-05	0.00358934	yes	50.3541	86.869	0.786733	5e-05	0.00120857	yes
INSR	chr19:7112265-7294011	11.4544	14.639	0.35391	0.02405	0.999863	no	11.6657	17.1465	0.555639	5e-05	0.00358934	yes	12.7417	20.102	0.657789	5e-05	0.00120857	yes
ADAMTS10	chr19:8645125-8675588	0.902983	1.1771	0.382468	0.10895	0.999863	no	1.03156	1.76948	0.778497	5e-05	0.00358934	yes	1.43436	3.35636	1.2265	5e-05	0.00120857	yes
NR4A2	chr2:157180943-157189287	1.33848	1.17808	-0.184158	0.43625	0.999863	no	1.56641	1.02236	-0.615564	0.0001	0.00670237	yes	1.12223	0.610696	-0.877844	0.0031	0.0377996	yes
CYTIP	chr2:158271130-158300604	4.19842	4.18166	-0.00576892	0.98085	0.999863	no	5.02783	3.56525	-0.495931	0.00065	0.0340456	yes	6.07849	3.34906	-0.859956	5e-05	0.00120857	yes
SP100	chr2:231280870-231410317	22.116	33.9382	0.61782	0.00065	0.172949	no	22.0717	40.2423	0.866513	5e-05	0.00358934	yes	23.0145	47.5062	1.04557	5e-05	0.00120857	yes
NMUR1	chr2:232387870-232395182	1.83576	2.54348	0.470427	0.02875	0.999863	no	2.27343	3.63734	0.678013	5e-05	0.00358934	yes	2.53527	3.84773	0.601867	0.0036	0.0424583	yes
CDC42EP3	chr2:37869024-37899678	34.5306	27.3413	-0.336792	0.03185	0.999863	no	36.0661	25.555	-0.497037	5e-05	0.00358934	yes	30.8645	17.7147	-0.801	5e-05	0.00120857	yes
SLC8A1	chr2:40144773-40739575	4.53947	3.95833	-0.197634	0.2559	0.999863	no	4.07442	2.76127	-0.561259	5e-05	0.00358934	yes	4.36818	2.53268	-0.786367	5e-05	0.00120857	yes
JAG1	chr20:10618331-10654694	0.948546	1.37501	0.535656	0.01395	0.999863	no	0.93021	1.47132	0.661484	5e-05	0.00358934	yes	0.781188	2.31153	1.5651	5e-05	0.00120857	yes
CD93	chr20:23059992-23066977	55.9811	69.7084	0.316394	0.04145	0.999863	no	53.4337	79.7259	0.577297	5e-05	0.00358934	yes	56.9374	102.64	0.850145	5e-05	0.00120857	yes
SIGLEC1	chr20:3667616-3687775	3.25803	3.59516	0.142055	0.42095	0.999863	no	3.81599	2.61423	-0.545671	5e-05	0.00358934	yes	2.54716	1.70489	-0.579214	0.00335	0.0399925	yes
RASSF2	chr20:4760668-4804291	18.4009	23.867	0.375235	0.01655	0.999863	no	17.341	24.4956	0.498337	5e-05	0.00358934	yes	18.3926	32.38	0.815974	5e-05	0.00120857	yes
CTSZ	chr20:57570241-57582309	128.327	151.461	0.239122	0.1283	0.999863	no	131.972	170.742	0.371582	0.0007	0.0357379	yes	121.19	360.452	1.57253	5e-05	0.00120857	yes
NTSR1	chr20:61340188-61394123	1.55152	2.23708	0.527938	0.0127	0.999863	no	1.86767	2.70695	0.535429	0.0001	0.00670237	yes	1.73667	3.2699	0.912924	5e-05	0.00120857	yes
SAMSN1	chr21:15857548-16015428	4.58022	3.48044	-0.396147	0.0633	0.999863	no	4.25933	2.68174	-0.667458	5e-05	0.00358934	yes	4.45999	2.57198	-0.794162	0.0012	0.0179423	yes
ITSN1	chr21:35014783-35261609	2.33417	3.50768	0.587606	0.00165	0.35255	no	2.15518	4.81794	1.16061	5e-05	0.00358934	yes	2.35438	10.469	2.1527	5e-05	0.00120857	yes
MX1	chr21:42792519-42831141	24.412	25.8612	0.083198	0.6056	0.999863	no	25.435	15.8804	-0.67957	5e-05	0.00358934	yes	12.7637	6.76618	-0.915635	5e-05	0.00120857	yes
ICOSLG	chr21:45646721-45660834	6.36589	6.64855	0.062676	0.7247	0.999863	no	6.69207	4.87023	-0.458463	0.00055	0.0294625	yes	5.06777	2.82111	-0.845087	0.0001	0.00223912	yes
CECR6	chr22:17597188-17602257	6.20347	5.58562	-0.151358	0.38955	0.999863	no	7.58188	5.29196	-0.518755	5e-05	0.00358934	yes	6.58656	3.63571	-0.857289	5e-05	0.00120857	yes
ELFN2	chr22:37763999-37823505	0.195479	0.331231	0.760822	1	1	no	0.171723	0.45977	1.42083	5e-05	0.00358934	yes	0.194347	0.954451	2.29604	5e-05	0.00120857	yes
NR1I2	chr3:119499330-119537332	0.776604	1.09695	0.498249	0.07425	0.999863	no	0.841979	1.32539	0.654567	0.00045	0.024571	yes	0.873004	6.75253	2.95137	5e-05	0.00120857	yes
ITGB5	chr3:124481794-124606144	5.02301	6.523	0.376985	0.0376	0.999863	no	5.67606	8.31301	0.550481	5e-05	0.00358934	yes	4.21869	19.2147	2.18735	5e-05	0.00120857	yes
PTX3	chr3:156977531-157221415	9.76698	8.20131	-0.252059	0.17	0.999863	no	10.9127	6.75974	-0.690967	5e-05	0.00358934	yes	7.66264	3.7642	-1.0255	5e-05	0.00120857	yes
ANKRD28	chr3:15708743-15901053	12.374	11.2377	-0.138959	0.38025	0.999863	no	12.9662	8.79422	-0.560133	5e-05	0.00358934	yes	12.0096	6.35268	-0.918748	5e-05	0.00120857	yes
BCL6	chr3:187416046-187463513	2.64736	4.15284	0.649544	0.001	0.235033	no	2.55959	3.76887	0.558218	0.00025	0.0149809	yes	2.24927	8.77212	1.96347	5e-05	0.00120857	yes
TRAK1	chr3:42132745-42267382	13.2107	19.2347	0.542005	0.0008	0.20512	no	13.3006	20.7773	0.643514	5e-05	0.00358934	yes	14	22.5334	0.686645	5e-05	0.00120857	yes
ZNF589	chr3:48282595-48312479	5.58338	8.77675	0.652548	0.0002	0.0587583	no	5.57417	10.5562	0.921259	5e-05	0.00358934	yes	5.49357	16.6401	1.59884	5e-05	0.00120857	yes
PFKFB4	chr3:48555116-48594227	7.4304	10.5971	0.512163	0.0034	0.601915	no	11.0181	17.0316	0.628337	5e-05	0.00358934	yes	20.9206	30.7909	0.557579	0.00065	0.0108052	yes
FILIP1L	chr3:99273152-99897476	22.8719	17.7871	-0.362744	0.03985	0.999863	no	20.9597	13.9213	-0.590323	5e-05	0.00358934	yes	20.0513	8.39593	-1.25594	5e-05	0.00120857	yes
CD38	chr4:15779930-15850706	5.07375	6.55019	0.368485	0.07745	0.999863	no	5.08366	9.24146	0.862253	5e-05	0.00358934	yes	4.68408	25.166	2.42564	5e-05	0.00120857	yes
MSMO1	chr4:166248817-166264314	104.791	101.96	-0.0395184	0.79835	0.999863	no	105.466	79.3175	-0.411074	0.0003	0.0174593	yes	133.027	97.3266	-0.450817	0.004	0.0462587	yes
SEL1L3	chr4:25749048-25864610	20.2285	26.8865	0.410497	0.00985	0.999863	no	20.2103	31.9236	0.659533	5e-05	0.00358934	yes	20.4712	53.6388	1.38968	5e-05	0.00120857	yes
HTT	chr4:3076407-3245687	7.2103	8.82372	0.291328	0.0656	0.999863	no	6.95855	10.5899	0.605831	5e-05	0.00358934	yes	7.14498	21.3543	1.57952	5e-05	0.00120857	yes
TMEM156	chr4:38968440-39034041	1.01141	1.26775	0.3259	0.267	0.999863	no	0.962051	1.67703	0.801724	0.00015	0.009428	yes	1.28418	2.56288	0.996921	0.0006	0.0100596	yes
IL8	chr4:74606222-74609433	8.89034	10.635	0.258509	0.17315	0.999863	no	9.04095	5.05687	-0.83823	5e-05	0.00358934	yes	4.45455	22.1809	2.31597	5e-05	0.00120857	yes
PKD2	chr4:88928798-88998931	7.26139	9.18502	0.339037	0.03995	0.999863	no	7.87042	10.4744	0.412361	0.0007	0.0357379	yes	9.81075	15.3548	0.646259	5e-05	0.00120857	yes
SMIM3	chr5:150157507-150176298	26.0244	36.4132	0.484592	0.0023	0.44431	no	26.0052	40.177	0.627573	5e-05	0.00358934	yes	27.2366	49.1645	0.852068	5e-05	0.00120857	yes
GM2A	chr5:150632612-150649953	20.7783	24.2379	0.222185	0.1652	0.999863	no	20.2396	27.3548	0.434612	0.0002	0.0121914	yes	23.1646	49.0754	1.08308	5e-05	0.00120857	yes
GABRG2	chr5:161494647-161582545	1.94242	2.88932	0.572875	0.00455	0.737518	no	1.96794	3.57043	0.859408	5e-05	0.00358934	yes	1.85417	8.42509	2.18392	5e-05	0.00120857	yes
LTC4S	chr5:179220985-179223513	52.5558	56.5228	0.104984	0.5496	0.999863	no	58.935	85.7946	0.541761	5e-05	0.00358934	yes	64.7228	122.579	0.921371	5e-05	0.00120857	yes
IL7R	chr5:35856976-35879705	1.32437	0.968145	-0.452006	0.0494	0.999863	no	1.5259	0.624498	-1.28889	5e-05	0.00358934	yes	0.721938	0.187984	-1.94127	0.0001	0.00223912	yes
NIM1	chr5:43192169-43280952	2.09651	1.85393	-0.177406	0.44485	0.999863	no	2.32791	1.51394	-0.620724	5e-05	0.00358934	yes	2.07811	0.82898	-1.32586	5e-05	0.00120857	yes
HMGCS1	chr5:43287571-43313614	205.189	206.503	0.00921202	0.95295	0.999863	no	186.583	143.154	-0.382249	0.00095	0.0464875	yes	244.303	171.305	-0.512105	0.002	0.0267992	yes
ERBB2IP	chr5:65222381-65376851	23.1165	28.2837	0.291051	0.06095	0.999863	no	21.5045	30.1062	0.485423	5e-05	0.00358934	yes	23.7903	40.302	0.760478	5e-05	0.00120857	yes
HIVEP1	chr6:12012723-12165232	1.42518	1.37166	-0.0552177	0.7734	0.999863	no	1.46384	1.05492	-0.472625	0.0009	0.0446589	yes	1.19917	0.74727	-0.68234	0.00185	0.0253606	yes
SMPDL3A	chr6:123109970-123130864	4.04815	4.64558	0.198595	0.3262	0.999863	no	3.6317	5.69476	0.648989	5e-05	0.00358934	yes	3.83376	12.1914	1.66903	5e-05	0.00120857	yes
NCOA7	chr6:126102306-126253176	8.49381	7.26946	-0.224563	0.20275	0.999863	no	8.21892	5.65388	-0.539706	5e-05	0.00358934	yes	7.60906	4.1184	-0.885635	5e-05	0.00120857	yes
PHACTR1	chr6:12717036-13295818	1.05737	0.922723	-0.196505	0.4837	0.999863	no	1.3654	0.788801	-0.791591	0.0001	0.00670237	yes	1.76464	0.727422	-1.27851	0.00075	0.0122152	yes
TNFAIP3	chr6:138144806-138204451	9.18619	8.04239	-0.191842	0.25305	0.999863	no	10.6863	6.99329	-0.611724	5e-05	0.00358934	yes	10.4923	5.67428	-0.886827	5e-05	0.00120857	yes
SAP25	chr7:100169852-100171270	31.0574	38.3623	0.304753	0.0869	0.999863	no	35.6167	47.6384	0.419568	0.00065	0.0340456	yes	33.5469	56.27	0.746187	5e-05	0.00120857	yes
LRCH4	chr7:100171633-100183776	49.1267	61.0195	0.312762	0.0457	0.999863	no	51.8815	75.4057	0.539453	5e-05	0.00358934	yes	50.0193	84.3696	0.75424	5e-05	0.00120857	yes
IRF5	chr7:128577993-128590088	73.5063	93.4821	0.346822	0.02665	0.999863	no	74.1385	102.194	0.463013	5e-05	0.00358934	yes	70.8372	114.263	0.689784	5e-05	0.00120857	yes
FAM20C	chr7:192968-300740	26.2416	33.4149	0.34864	0.0303	0.999863	no	28.2204	37.8869	0.424957	0.0002	0.0121914	yes	22.8277	40.4984	0.827078	5e-05	0.00120857	yes
AQP1	chr7:30951414-30965131	6.64442	6.24544	-0.0893391	0.6385	0.999863	no	8.04312	4.36879	-0.880519	5e-05	0.00358934	yes	3.51224	1.40016	-1.3268	5e-05	0.00120857	yes
FOXK1	chr7:4721929-4811074	8.30151	11.3023	0.445176	0.0047	0.744712	no	8.53654	12.2737	0.523847	5e-05	0.00358934	yes	8.17856	13.8401	0.75894	5e-05	0.00120857	yes
TNS3	chr7:47314751-47621742	18.4454	21.1112	0.194748	0.2029	0.999863	no	17.1096	22.9091	0.421113	0.0002	0.0121914	yes	19.6912	29.739	0.594802	0.00025	0.00496408	yes
NCF1	chr7:74188308-74203659	6.13868	9.21063	0.585371	0.00365	0.620148	no	7.03823	11.1021	0.657545	5e-05	0.00358934	yes	7.54214	33.3511	2.14469	5e-05	0.00120857	yes
NCF1C	chr7:74572383-74587816	4.07088	5.41639	0.411992	0.05685	0.999863	no	4.30011	6.40025	0.573756	5e-05	0.00358934	yes	3.80031	19.758	2.37825	5e-05	0.00120857	yes
ABCB4	chr7:87031360-87105019	1.50434	2.44073	0.69818	0.0011	0.254298	no	1.55263	2.38918	0.621802	5e-05	0.00358934	yes	0.985913	5.9263	2.5876	5e-05	0.00120857	yes
SAMD9L	chr7:92759367-92777680	12.2436	11.8108	-0.0519133	0.7419	0.999863	no	12.0463	9.05406	-0.41195	0.00045	0.024571	yes	11.1098	5.7713	-0.94487	5e-05	0.00120857	yes
SLC7A2	chr8:17354596-17428077	0.580366	0.754553	0.378657	0.0993	0.999863	no	0.549936	0.851104	0.630071	0.0002	0.0121914	yes	0.481857	2.25133	2.2241	5e-05	0.00120857	yes
EGR3	chr8:22545173-22550815	2.2839	1.7921	-0.349846	0.08895	0.999863	no	2.82888	1.41506	-0.99937	5e-05	0.00358934	yes	1.36275	0.824734	-0.724523	0.00415	0.0475512	yes
ADAM28	chr8:24151579-24212726	0.693054	0.974214	0.491272	0.08515	0.999863	no	0.616227	1.04213	0.758006	0.0001	0.00670237	yes	0.834859	13.394	4.00392	5e-05	0.00120857	yes
ADAMDEC1	chr8:24241797-24263526	0.691334	1.1361	0.716639	0.015	0.999863	no	0.62128	1.19205	0.940135	5e-05	0.00358934	yes	0.670518	24.3387	5.18183	5e-05	0.00120857	yes
PNOC	chr8:28174648-28200868	1.32585	1.69078	0.350776	0.2631	0.999863	no	1.19527	3.12527	1.38664	5e-05	0.00358934	yes	1.51919	9.39926	2.62924	5e-05	0.00120857	yes
ABCA1	chr9:107543283-107690527	5.54764	5.14609	-0.108398	0.50735	0.999863	no	5.58727	4.23169	-0.400908	0.00095	0.0464875	yes	5.83383	1.78023	-1.71238	5e-05	0.00120857	yes
DAB2IP	chr9:124329398-124547809	1.32662	1.61586	0.284544	0.1856	0.999863	no	1.30497	1.84645	0.500732	0.00065	0.0340456	yes	1.48977	2.56418	0.783413	0.00035	0.00647074	yes
TUSC1	chr9:25676386-25678856	10.9155	12.6585	0.213726	0.21605	0.999863	no	10.9765	14.7661	0.427867	0.00045	0.024571	yes	9.42206	14.8036	0.651829	0.00015	0.00324194	yes
PDCD1LG2	chr9:5510544-5571282	0.230282	0.61885	1.42619	0.0012	0.272942	no	0.234441	0.656311	1.48515	5e-05	0.00358934	yes	0.217794	1.35744	2.63985	5e-05	0.00120857	yes
GCNT1	chr9:79056581-79122332	12.81	10.3224	-0.311486	0.053	0.999863	no	12.7	9.08051	-0.483983	5e-05	0.00358934	yes	14.6223	5.85118	-1.32137	5e-05	0.00120857	yes
TLE4	chr9:82186877-82341656	21.0249	24.0463	0.193718	0.21575	0.999863	no	19.084	24.6265	0.367848	0.0009	0.0446589	yes	19.9055	28.9463	0.540214	0.0007	0.0114966	yes
SEMA4D	chr9:91975705-92094611	10.1071	14.4937	0.520061	0.00125	0.279802	no	10.3012	17.8071	0.789632	5e-05	0.00358934	yes	10.5007	25.5441	1.2825	5e-05	0.00120857	yes
SUSD3	chr9:95820988-95847415	17.5737	19.862	0.176591	0.31965	0.999863	no	17.8134	24.9285	0.484838	0.0003	0.0174593	yes	17.6418	28.8821	0.711181	0.0001	0.00223912	yes
C9orf89	chr9:95858449-95875565	29.5136	44.4585	0.59108	0.001	0.235033	no	29.729	55.4848	0.900221	5e-05	0.00358934	yes	27.1775	89.3285	1.71671	5e-05	0.00120857	yes
ELF4	chrX:129198894-129244688	34.5425	46.1274	0.417255	0.00715	0.999863	no	32.3922	48.0658	0.569364	5e-05	0.00358934	yes	32.6886	50.5196	0.628056	5e-05	0.00120857	yes
CXorf21	chrX:30576940-30596033	142.365	119.671	-0.250522	0.10415	0.999863	no	133.46	93.7743	-0.509142	5e-05	0.00358934	yes	143.179	66.9457	-1.09676	5e-05	0.00120857	yes
EFNB1	chrX:68048839-68062006	4.14118	5.50007	0.409408	0.028	0.999863	no	3.482	5.66283	0.701607	5e-05	0.00358934	yes	3.41227	6.47999	0.925261	5e-05	0.00120857	yes
STS	chrX:7137471-7272682	1.21514	1.74344	0.520819	0.0108	0.999863	no	1.22389	1.87368	0.614406	5e-05	0.00358934	yes	1.21571	7.52537	2.62997	5e-05	0.00120857	yes
SH2D2A	chr1:156776034-156851642	3.8028	3.96574	0.0605252	0.78825	0.999863	no	4.60818	3.00248	-0.618041	0.00015	0.009428	yes	2.17533	2.21964	0.0290877	0.91245	0.988914	no
CD244	chr1:160799949-160832692	20.3313	23.9594	0.236892	0.14905	0.999863	no	18.7645	26.0722	0.474507	0.00015	0.009428	yes	20.2998	26.0163	0.357954	0.03265	0.219609	no
RGL1	chr1:183605207-183897666	1.05219	1.08124	0.0392789	0.86265	0.999863	no	1.07795	0.73691	-0.548728	0.0009	0.0446589	yes	0.701108	0.551335	-0.346707	0.19815	0.628394	no
RGS1	chr1:192544856-192549159	0.596834	0.464361	-0.362083	0.39555	0.999863	no	0.972312	0.38296	-1.34422	5e-05	0.00358934	yes	1.13323	0.670107	-0.757976	0.0656	0.344917	no
RGS2	chr1:192778168-192781407	18.9649	16.8152	-0.173573	0.331	0.999863	no	22.7264	13.4758	-0.754001	5e-05	0.00358934	yes	16.6649	11.8509	-0.491818	0.00995	0.0937507	no
SLC30A1	chr1:211748380-211752099	8.32	9.4633	0.185759	0.3163	0.999863	no	6.5694	9.12979	0.474821	0.0003	0.0174593	yes	7.10847	9.98262	0.489881	0.00985	0.0931935	no
IFI6	chr1:27992571-27998724	114.966	112.436	-0.0320991	0.84505	0.999863	no	126.475	93.0374	-0.442969	0.0002	0.0121914	yes	80.1873	58.4731	-0.455601	0.00885	0.0856272	no
SPSB1	chr1:9352940-9429590	2.75775	3.77913	0.454564	0.023	0.999863	no	2.40329	3.83193	0.67306	5e-05	0.00358934	yes	2.71111	2.83735	0.0656628	0.75185	0.966907	no
ISG15	chr1:948846-949919	58.372	58.0606	-0.00771806	0.96615	0.999863	no	67.7549	41.3631	-0.71198	5e-05	0.00358934	yes	32.4529	26.9848	-0.2662	0.16195	0.570776	no
ADRA2A	chr10:112836789-112840662	0.575069	0.511287	-0.169602	0.56505	0.999863	no	0.593497	0.333823	-0.830158	5e-05	0.00358934	yes	0.269178	0.129969	-1.0504	1	1	no
EBF3	chr10:131633495-131762091	10.7844	14.2503	0.40204	0.0135	0.999863	no	10.6936	16.611	0.635385	5e-05	0.00358934	yes	13.4804	14.4191	0.0971171	0.55275	0.917072	no
ZMIZ1	chr10:80828791-81076285	17.5352	22.2156	0.341315	0.0276	0.999863	no	17.7035	23.6014	0.414838	0.0003	0.0174593	yes	16.9408	21.898	0.370304	0.0213	0.161892	no
IFIT5	chr10:91174324-91180759	1.54777	1.39048	-0.154613	0.4827	0.999863	no	1.58549	0.959396	-0.724734	5e-05	0.00358934	yes	1.0158	0.663949	-0.613474	0.02505	0.183071	no
FTH1	chr11:61717355-61735132	882.035	935.289	0.0845762	0.605	0.999863	no	1008.97	741.13	-0.445089	0.00035	0.0197199	yes	675.207	534.24	-0.337842	0.0398	0.250923	no
OASL	chr12:121458094-121477045	3.51801	4.59919	0.386621	0.06125	0.999863	no	4.43087	2.62476	-0.755406	5e-05	0.00358934	yes	1.83638	1.5039	-0.288161	0.26365	0.710039	no
PKP2	chr12:32943679-33049780	0.247045	0.402019	0.70249	0.0315	0.999863	no	0.235388	0.509443	1.11388	5e-05	0.00358934	yes	0.30298	0.527627	0.800295	0.0177	0.141528	no
LIMA1	chr12:50569562-50677353	10.6725	8.9222	-0.258423	0.12785	0.999863	no	10.2698	7.36574	-0.479506	0.00015	0.009428	yes	9.59542	6.90961	-0.473741	0.0062	0.0646018	no
NR4A1	chr12:52416615-52453291	8.20439	7.55702	-0.118579	0.51075	0.999863	no	10.851	6.82013	-0.669961	5e-05	0.00358934	yes	6.53229	5.76239	-0.180922	0.35495	0.799443	no
PHLDA1	chr12:76419226-76425556	0.846833	0.763489	-0.14947	0.5212	0.999863	no	0.887185	0.565799	-0.648945	0.0001	0.00670237	yes	0.776558	0.488481	-0.668791	0.0129	0.113059	no
CHSY1	chr15:101715927-101792137	36.3205	49.3066	0.440998	0.00435	0.713299	no	38.1224	52.8819	0.472135	5e-05	0.00358934	yes	45.1286	47.5227	0.0745746	0.6364	0.945841	no
THBS1	chr15:39873279-39889668	0.574069	0.637848	0.151987	0.55965	0.999863	no	0.516993	0.300981	-0.780474	0.0002	0.0121914	yes	0.230682	0.0778042	-1.56799	1	1	no
TNFAIP8L3	chr15:51348798-51397473	1.96797	1.84244	-0.0950869	0.7003	0.999863	no	2.54989	1.44279	-0.821578	5e-05	0.00358934	yes	1.29905	1.48614	0.194113	0.4811	0.884177	no
ANXA2	chr15:60639349-60690185	92.688	89.6999	-0.0472772	0.7596	0.999863	no	95.3165	72.9642	-0.385538	0.0006	0.0318992	yes	70.9875	79.9198	0.170987	0.2863	0.735562	no
YPEL3	chr16:30103634-30107537	36.1509	36.867	0.0282973	0.87555	0.999863	no	37.0718	50.2513	0.438838	0.00035	0.0197199	yes	42.4659	37.67	-0.17289	0.3256	0.771749	no
TNFRSF12A	chr16:3070312-3072383	4.07944	4.06848	-0.00387868	0.98805	0.999863	no	4.97873	2.96104	-0.749673	5e-05	0.00358934	yes	3.45423	1.86458	-0.889513	0.00495	0.0544381	no
OSGIN1	chr16:83986826-83999937	4.09321	3.99469	-0.0351496	0.8672	0.999863	no	3.99356	2.57294	-0.634261	5e-05	0.00358934	yes	2.18549	2.07087	-0.0777163	0.75935	0.96767	no
MIR22HG	chr17:1614797-1619566	1.7886	2.07969	0.217538	0.3789	0.999863	no	1.88741	1.19774	-0.656101	0.0008	0.0404057	yes	1.00905	1.04816	0.0548564	0.8609	0.984849	no
CCL2	chr17:32582295-32584220	6.06793	5.17935	-0.228432	0.3819	0.999863	no	5.45243	1.90319	-1.51848	5e-05	0.00358934	yes	2.2124	0.93266	-1.24619	0.01265	0.111224	no
SGSH	chr17:78143790-78194199	0.876805	0.955564	0.124097	0.64685	0.999863	no	1.2374	0.771663	-0.681267	0.0007	0.0357379	yes	0.653549	1.03322	0.660784	0.03375	0.224907	no
BAHCC1	chr17:79373539-79433358	28.0879	30.9449	0.13975	0.3623	0.999863	no	29.0674	38.0154	0.387181	0.00065	0.0340456	yes	30.5566	37.66	0.301551	0.05475	0.309008	no
NTN1	chr17:8924858-9147317	2.05299	2.08908	0.0251425	0.8939	0.999863	no	2.50633	1.68975	-0.568762	0.0001	0.00670237	yes	1.25313	1.17928	-0.087633	0.69535	0.957532	no
LIPG	chr18:47088426-47119278	1.57048	1.73499	0.143727	0.5014	0.999863	no	1.48545	1.02313	-0.537917	0.0007	0.0357379	yes	1.63013	1.45629	-0.162697	0.47515	0.880353	no
RELB	chr19:45504706-45541456	14.9996	14.4199	-0.0568545	0.74045	0.999863	no	17.5172	11.826	-0.566807	5e-05	0.00358934	yes	11.4411	9.39096	-0.284876	0.1183	0.482835	no
PLA2G4C	chr19:48551099-48614109	4.5367	4.2782	-0.0846404	0.659	0.999863	no	4.98583	3.42946	-0.539853	0.00015	0.009428	yes	3.64344	2.69082	-0.437254	0.0402	0.252365	no
PPP1R15A	chr19:49375648-49379319	28.3185	27.5509	-0.0396456	0.80935	0.999863	no	32.2773	24.4962	-0.397962	0.0003	0.0174593	yes	28.8429	21.1559	-0.447155	0.00815	0.0801583	no
FPR1	chr19:52249022-52255150	1.02115	1.04832	0.0378763	0.91955	0.999863	no	1.09419	0.578378	-0.919784	0.00095	0.0464875	yes	0.699204	0.389397	-0.844472	0.0936	0.425712	no
SP9	chr2:175199820-175202268	34.7924	35.1604	0.0151805	0.9255	0.999863	no	36.2574	48.4034	0.416832	0.0003	0.0174593	yes	39.6689	38.8065	-0.0317122	0.8497	0.98347	no
STAT4	chr2:191894301-192016322	1.37209	1.4235	0.0530596	0.82945	0.999863	no	1.66729	1.02593	-0.700583	5e-05	0.00358934	yes	1.02036	0.573688	-0.830745	0.0107	0.0984443	no
LBH	chr2:30454396-30482899	5.31887	5.30108	-0.00483489	0.97905	0.999863	no	5.7729	3.9724	-0.539286	0.00015	0.009428	yes	3.93208	3.71716	-0.0810932	0.68215	0.954062	no
CRIM1	chr2:36583369-36778278	0.371237	0.332241	-0.16011	0.5817	0.999863	no	0.375792	0.22887	-0.715406	0.0007	0.0357379	yes	0.333356	0.229218	-0.540346	1	1	no
CMPK2	chr2:6980683-7006766	10.0824	10.1168	0.00490653	0.9794	0.999863	no	10.693	7.5769	-0.496993	0.00035	0.0197199	yes	6.43187	4.55797	-0.496846	0.01795	0.142942	no
LYG1	chr2:99900700-99917639	1.3668	1.26987	-0.106117	0.76	0.999863	no	1.76558	0.98357	-0.844045	0.0005	0.0271962	yes	1.45399	1.18815	-0.291307	0.45015	0.867517	no
JPH2	chr20:42740336-42816218	0.249737	0.381169	0.610021	0.111	0.999863	no	0.241728	0.534463	1.14471	0.0001	0.00670237	yes	1.00244	0.596736	-0.748344	0.01265	0.111224	no
ADAMTS1	chr21:28208605-28217728	10.7202	8.96751	-0.257549	0.12035	0.999863	no	10.5318	7.1049	-0.567865	5e-05	0.00358934	yes	7.07651	7.1696	0.0188538	0.9107	0.988754	no
KCNE1	chr21:35818985-35884573	0.725835	0.843974	0.217558	0.4021	0.999863	no	0.81562	0.427881	-0.930688	5e-05	0.00358934	yes	0.616084	0.859494	0.480361	0.09265	0.422938	no
MX2	chr21:42733949-42780869	14.0818	15.5935	0.147106	0.3751	0.999863	no	14.6029	10.2213	-0.514678	5e-05	0.00358934	yes	9.0236	6.86151	-0.395177	0.03035	0.208338	no
MIR3648	chr21:9825831-9826011	303.947	483.266	0.669	0.00215	0.427032	no	444.744	677.473	0.60719	5e-05	0.00358934	yes	418.268	390.394	-0.0994998	0.654	0.949525	no
HMOX1	chr22:35777059-35790207	9.55067	11.063	0.212062	0.2615	0.999863	no	10.8177	3.47114	-1.63992	5e-05	0.00358934	yes	3.02207	2.69952	-0.162837	0.5141	0.900794	no
GALR3	chr22:38219388-38221502	0.823577	0.879294	0.0944421	0.80255	0.999863	no	0.725195	1.47143	1.02078	0.00015	0.009428	yes	0.714167	1.0995	0.622516	0.13845	0.525564	no
MAFF	chr22:38597938-38612517	2.31649	2.64207	0.189728	0.38545	0.999863	no	3.57198	2.50818	-0.510083	0.0007	0.0357379	yes	3.6762	2.73329	-0.427576	0.05145	0.296374	no
PLXNB2	chr22:50713407-50746001	90.4415	102.504	0.180626	0.2476	0.999863	no	92.3638	121.586	0.39658	0.00035	0.0197199	yes	91.9863	121.807	0.405105	0.01295	0.113279	no
KLHDC7B	chr22:50986461-50989452	0.674941	0.642096	-0.0719711	0.80505	0.999863	no	0.759291	0.318325	-1.25415	5e-05	0.00358934	yes	0.334739	0.347101	0.0523151	1	1	no
PARP14	chr3:122399671-122449687	16.656	16.261	-0.0346273	0.8271	0.999863	no	16.12	12.2708	-0.393624	0.00085	0.0426266	yes	12.6629	9.70131	-0.384361	0.0181	0.143885	no
ACPP	chr3:132036210-132087146	10.7863	12.1162	0.167737	0.3608	0.999863	no	9.29216	13.2329	0.510039	5e-05	0.00358934	yes	10.8642	13.4164	0.304417	0.10095	0.444094	no
SERPINI1	chr3:167453431-167543357	4.35428	4.27229	-0.0274263	0.89925	0.999863	no	4.82208	2.7404	-0.815268	5e-05	0.00358934	yes	3.27763	2.03595	-0.686955	0.00835	0.0818312	no
LOC344887	chr3:185677757-185698665	1.19064	1.21733	0.0319855	0.9111	0.999863	no	1.33004	0.555195	-1.2604	5e-05	0.00358934	yes	0.640911	0.644578	0.00823034	0.96525	0.994168	no
CLEC3B	chr3:45067758-45077563	5.35698	6.85037	0.354762	0.14155	0.999863	no	4.88424	7.74483	0.665101	0.00025	0.0149809	yes	5.37844	8.75659	0.703182	0.00525	0.0566445	no
PRMT10	chr4:148559533-148605280	3.90901	5.14383	0.396042	0.0397	0.999863	no	3.6034	5.1206	0.506956	0.00035	0.0197199	yes	3.78592	5.52082	0.54424	0.0067	0.0691794	no
CNGA1	chr4:47937993-48014961	0.790915	0.724128	-0.127276	0.6408	0.999863	no	0.923893	0.527189	-0.809405	5e-05	0.00358934	yes	0.633627	0.298593	-1.08545	0.0071	0.0720053	no
ZAR1	chr4:48492308-48496422	4.40736	3.82012	-0.206295	0.3717	0.999863	no	4.22613	6.06463	0.52108	0.0006	0.0318992	yes	4.50034	4.33121	-0.0552658	0.8133	0.978047	no
CXCL10	chr4:76932332-77033955	1.59035	1.5311	-0.0547683	0.86475	0.999863	no	1.53865	0.363344	-2.08225	0.00045	0.024571	yes	0.692915	0.0810824	-3.09522	0.0266	0.190232	no
DUSP1	chr5:172195092-172198203	0.934505	1.00945	0.111298	0.7108	0.999863	no	1.19902	0.717238	-0.741328	0.00055	0.0294625	yes	0.781837	0.703547	-0.15222	0.6614	0.950735	no
PRLR	chr5:35048860-35230823	1.06674	0.880116	-0.27744	0.16615	0.999863	no	1.00389	0.619652	-0.696069	0.0001	0.00670237	yes	0.851969	0.596341	-0.514664	0.03085	0.210503	no
PTGER4	chr5:40680031-40693837	41.7242	33.6913	-0.308507	0.0481	0.999863	no	44.332	33.7744	-0.392416	0.00045	0.024571	yes	44.4357	32.4664	-0.452773	0.00555	0.0592737	no
IL31RA	chr5:55147206-55218682	1.39165	1.42764	0.0368412	0.87725	0.999863	no	1.45434	0.947648	-0.617945	0.00055	0.0294625	yes	1.13432	0.777971	-0.54404	0.06035	0.328682	no
VCAN	chr5:82767492-82878122	1.85226	1.70536	-0.11921	0.57685	0.999863	no	1.47064	0.905426	-0.699777	0.0001	0.00670237	yes	1.34268	1.04111	-0.367001	0.1071	0.458459	no
CTGF	chr6:132269316-132272518	2.16089	1.86997	-0.208607	0.386	0.999863	no	2.12145	1.29738	-0.709455	5e-05	0.00358934	yes	1.24777	0.966913	-0.367893	0.2135	0.65286	no
SGK1	chr6:134490383-134639196	1.64328	1.79343	0.126138	0.60235	0.999863	no	2.01414	1.08176	-0.89678	5e-05	0.00358934	yes	1.41565	2.25223	0.669888	0.0085	0.0830039	no
CD83	chr6:14117486-14137148	5.40777	5.16478	-0.0663252	0.7375	0.999863	no	6.75	3.8468	-0.811231	5e-05	0.00358934	yes	4.58283	4.00191	-0.195552	0.3453	0.789051	no
CMAHP	chr6:25081294-25138620	1.33888	1.10588	-0.275827	0.30615	0.999863	no	1.49651	0.735597	-1.02461	5e-05	0.00358934	yes	1.07657	0.517157	-1.05777	0.00455	0.0511072	no
COL12A1	chr6:75794041-75915623	0.413855	0.396133	-0.0631402	0.80405	0.999863	no	0.442615	0.256458	-0.787327	5e-05	0.00358934	yes	0.287666	0.146383	-0.974652	1	1	no
PARP12	chr7:139723548-139763521	5.17159	5.2796	0.0298215	0.8625	0.999863	no	5.8727	4.32958	-0.439796	0.00055	0.0294625	yes	4.0544	3.34595	-0.277073	0.14835	0.545622	no
IGFBP3	chr7:45951843-45960871	1.55373	1.4436	-0.106063	0.66655	0.999863	no	1.48817	0.752609	-0.98357	5e-05	0.00358934	yes	0.547444	0.664038	0.278554	0.4115	0.84164	no
SEMA3D	chr7:84624871-84751247	0.423927	0.386706	-0.132576	0.6311	0.999863	no	0.403789	0.222072	-0.862572	5e-05	0.00358934	yes	0.387043	0.167236	-1.21061	1	1	no
ENPP2	chr8:120569316-120651106	0.910401	0.695962	-0.387494	0.25095	0.999863	no	0.953662	0.413759	-1.20469	5e-05	0.00358934	yes	0.236455	0.172929	-0.451388	1	1	no
LPL	chr8:19796581-19824770	4.73776	3.76607	-0.331148	0.07365	0.999863	no	4.66993	3.2853	-0.507376	0.00015	0.009428	yes	4.47562	3.63255	-0.301106	0.11865	0.483398	no
GFRA2	chr8:21549529-21646346	0.402694	0.484822	0.267769	0.39455	0.999863	no	0.534751	0.300303	-0.832448	0.0008	0.0404057	yes	0.377914	0.0999719	-1.91846	1	1	no
OSR2	chr8:99956630-99964326	3.40116	3.81541	0.16581	0.4471	0.999863	no	2.91143	4.67407	0.682953	5e-05	0.00358934	yes	3.5694	5.12099	0.520741	0.01845	0.14582	no
PLIN2	chr9:19115758-19127604	30.281	29.6601	-0.029887	0.85415	0.999863	no	48.1368	36.5744	-0.396306	0.00075	0.0381529	yes	75.2799	63.7134	-0.240668	0.1488	0.546652	no
CYBB	chrX:37639269-37672714	4.06497	3.56175	-0.190659	0.3108	0.999863	no	3.57797	2.42034	-0.56393	5e-05	0.00358934	yes	3.34852	2.89149	-0.211712	0.28885	0.737809	no
FAM102B	chr1:109102970-109181949	19.9275	18.7581	-0.087246	0.5773	0.999863	no	19.1093	16.9588	-0.172238	0.13245	0.999462	no	21.0068	12.4666	-0.752791	5e-05	0.00120857	yes
KCNA3	chr1:111214309-111217655	1.16256	0.979362	-0.247393	0.3318	0.999863	no	0.98178	0.890185	-0.141294	0.42425	0.999462	no	1.48135	0.441483	-1.74648	5e-05	0.00120857	yes
ATP5F1	chr1:111982511-112004525	128.905	129.072	0.00186312	0.9918	0.999863	no	128.785	125.374	-0.0387359	0.74965	0.999462	no	126.743	187.768	0.567051	0.0007	0.0114966	yes
OLFML3	chr1:114522029-114524875	5.46151	5.72088	0.0669364	0.7406	0.999863	no	4.98517	4.98817	0.000869544	0.9933	0.999462	no	6.09569	2.0991	-1.53802	5e-05	0.00120857	yes
AGTRAP	chr1:11796141-11810828	54.0693	48.3322	-0.161825	0.3223	0.999863	no	56.0557	55.6553	-0.0103418	0.92975	0.999462	no	50.2667	35.5004	-0.501768	0.0027	0.0338887	yes
FAM46C	chr1:118148603-118171011	0.342076	0.264531	-0.37088	1	1	no	0.577589	0.446196	-0.372366	0.0423	0.713	no	1.08843	0.379516	-1.52001	5e-05	0.00120857	yes
MFN2	chr1:12040237-12073572	26.319	26.3776	0.00320658	0.98205	0.999863	no	26.5739	26.8693	0.0159505	0.88715	0.999462	no	24.4483	35.5587	0.540467	0.0006	0.0100596	yes
DHRS3	chr1:12627938-12677820	2.50112	2.43845	-0.0366145	0.87815	0.999863	no	3.58887	3.10285	-0.209933	0.17315	0.999462	no	5.37014	3.12839	-0.77954	0.00085	0.0135534	yes
PDPN	chr1:13910251-13944452	1.21627	1.67305	0.460022	0.0576	0.999863	no	1.30783	1.43397	0.132836	0.4288	0.999462	no	0.752103	2.05983	1.45352	5e-05	0.00120857	yes
MCL1	chr1:150547026-150552214	104.955	128.956	0.297105	0.0531	0.999863	no	97.8562	119.909	0.293205	0.0092	0.267709	no	91.9358	129.299	0.492011	0.0026	0.0330582	yes
S100A10	chr1:151955385-151966714	99.6739	103.08	0.0484709	0.76605	0.999863	no	113.058	93.2391	-0.278056	0.0162	0.397591	no	111.302	68.2463	-0.705657	5e-05	0.00120857	yes
S100A9	chr1:153330329-153333503	182.035	168.205	-0.113996	0.49575	0.999863	no	153.289	150.997	-0.0217375	0.84755	0.999462	no	168.118	101.685	-0.72537	5e-05	0.00120857	yes
S100A8	chr1:153362507-153363664	118.258	116.625	-0.02006	0.91045	0.999863	no	105.938	97.4117	-0.121047	0.32645	0.999462	no	116.117	62.0614	-0.903813	5e-05	0.00120857	yes
RAB13	chr1:153954092-153958853	99.3854	101.912	0.0362149	0.81955	0.999863	no	104.386	99.6141	-0.0675104	0.54975	0.999462	no	114.502	77.4502	-0.564034	0.0006	0.0100596	yes
TMEM51	chr1:15479027-15546974	8.35037	7.44361	-0.165838	0.37505	0.999863	no	9.28357	8.62655	-0.105897	0.42485	0.999462	no	10.2499	6.28513	-0.705597	0.00015	0.00324194	yes
MUC1	chr1:155158299-155162706	24.9041	24.5917	-0.0182109	0.91315	0.999863	no	29.4535	28.7034	-0.0372172	0.75945	0.999462	no	30.5682	15.4392	-0.985435	5e-05	0.00120857	yes
MTX1	chr1:155178489-155197325	27.7794	28.0701	0.0150165	0.93545	0.999863	no	29.9782	31.0247	0.0495042	0.7028	0.999462	no	26.0911	37.4435	0.521157	0.00365	0.0429369	yes
FAM189B	chr1:155216995-155225274	26.1669	24.4586	-0.0974012	0.54495	0.999863	no	26.1606	27.846	0.0900728	0.43115	0.999462	no	30.5004	21.6576	-0.493953	0.0023	0.030169	yes
HCN3	chr1:155247217-155271225	3.54026	3.51955	-0.00846502	0.96615	0.999863	no	3.40472	4.03397	0.244666	0.11355	0.999462	no	5.12575	3.29126	-0.639123	0.00275	0.0342336	yes
LMNA	chr1:156052368-156109880	212.451	196.674	-0.111323	0.47695	0.999863	no	218.641	188.223	-0.216123	0.0605	0.870388	no	179.84	116.515	-0.626198	0.0002	0.004127	yes
MEF2D	chr1:156433512-156470634	118.326	108.89	-0.119906	0.4415	0.999863	no	118.927	108.09	-0.137841	0.22355	0.999462	no	118.826	81.2824	-0.547833	0.0005	0.0086261	yes
CD1D	chr1:158149736-158156216	1.43732	1.65256	0.201323	0.37465	0.999863	no	1.32941	1.69067	0.346814	0.0278	0.55295	no	1.31329	3.21827	1.2931	5e-05	0.00120857	yes
IGSF9	chr1:159896828-159915386	0.626802	0.567297	-0.143905	0.5903	0.999863	no	0.642605	0.699668	0.122738	0.493	0.999462	no	0.789361	0.374126	-1.07716	0.00115	0.0173082	yes
ADAMTS4	chr1:161159537-161168845	1.95812	2.10437	0.103921	0.60335	0.999863	no	2.32273	2.02262	-0.199592	0.16445	0.999462	no	2.00764	1.05701	-0.925511	0.0001	0.00223912	yes
FCER1G	chr1:161185086-161189038	973.157	977.284	0.00610486	0.9688	0.999863	no	1031.95	888.193	-0.216427	0.05575	0.8273	no	830.79	538.891	-0.624491	5e-05	0.00120857	yes
FCGR2A	chr1:161475204-161489360	42.2944	39.3488	-0.104147	0.51595	0.999863	no	40.1368	35.8731	-0.162026	0.1608	0.999462	no	40.9618	28.5959	-0.51847	0.00175	0.0241348	yes
FCGR2C	chr1:161551128-161571010	3.67532	4.96426	0.433707	0.0658	0.999863	no	3.82829	3.35588	-0.190009	0.2493	0.999462	no	6.42375	4.00426	-0.681878	0.0026	0.0330582	yes
HSPA7	chr1:161575848-161578341	10.476	13.7388	0.391167	0.03595	0.999863	no	10.7907	9.02343	-0.258046	0.04095	0.699414	no	18.3282	11.4473	-0.679059	0.00025	0.00496408	yes
GPA33	chr1:167022081-167059868	8.7399	8.93192	0.0313537	0.8571	0.999863	no	7.9729	9.62098	0.271079	0.0299	0.576084	no	9.32996	5.03077	-0.891093	5e-05	0.00120857	yes
DUSP27	chr1:167064086-167098402	3.52882	3.57032	0.0168671	0.9275	0.999863	no	3.35215	3.59017	0.0989633	0.4673	0.999462	no	3.98398	2.12011	-0.910073	5e-05	0.00120857	yes
POU2F1	chr1:167190065-167396582	4.71569	4.43814	-0.0875158	0.589	0.999863	no	4.43874	3.84791	-0.206075	0.07935	0.983495	no	4.3985	3.14852	-0.482335	0.00405	0.0467578	yes
MPZL1	chr1:167691186-167761156	4.62732	4.03229	-0.198577	0.2683	0.999863	no	4.5249	3.56341	-0.344629	0.00695	0.218415	no	4.88342	2.98421	-0.710543	0.0001	0.00223912	yes
SDHB	chr1:17345224-17380665	59.1083	55.973	-0.0786303	0.63605	0.999863	no	56.9332	60.4606	0.0867239	0.4602	0.999462	no	55.3463	102.668	0.891433	5e-05	0.00120857	yes
SLC9C2	chr1:173469603-173572233	0.891573	0.957055	0.102248	0.67085	0.999863	no	1.00384	0.861574	-0.220485	0.187	0.999462	no	1.51128	0.727034	-1.05568	5e-05	0.00120857	yes
ANKRD45	chr1:173577474-173639001	9.0834	9.04428	-0.0062266	0.97125	0.999863	no	9.01567	7.97197	-0.177497	0.16855	0.999462	no	9.95372	6.41624	-0.633509	0.0006	0.0100596	yes
ZBTB37	chr1:173837492-173855774	1.69379	1.74163	0.040179	0.87025	0.999863	no	1.7183	1.87433	0.125391	0.52265	0.999462	no	2.15661	1.1061	-0.963287	0.00055	0.00937055	yes
KIAA0040	chr1:175126122-175162229	2.931	3.457	0.238128	0.2036	0.999863	no	2.66394	3.59765	0.43349	0.0011	0.0523778	no	2.40741	5.40785	1.16757	5e-05	0.00120857	yes
ARHGEF10L	chr1:17866329-18024370	11.5288	12.3202	0.0957828	0.5582	0.999863	no	12.314	12.8834	0.0652051	0.5762	0.999462	no	10.969	16.4381	0.583611	0.0005	0.0086261	yes
SOAT1	chr1:179262848-179327814	9.40137	9.52237	0.0184494	0.90535	0.999863	no	8.40945	9.50585	0.176804	0.12695	0.999462	no	8.41384	16.4395	0.966335	5e-05	0.00120857	yes
QSOX1	chr1:180123967-180169859	312.467	291.199	-0.101699	0.5252	0.999863	no	318.267	289.418	-0.137087	0.24535	0.999462	no	285.281	188.398	-0.598599	0.00035	0.00647074	yes
GLUL	chr1:182350838-182361341	90.2107	88.2764	-0.0312714	0.84355	0.999863	no	90.2659	86.7788	-0.0568381	0.61245	0.999462	no	108.234	75.3294	-0.522871	0.00085	0.0135534	yes
RGS18	chr1:192127591-192154945	18.3838	15.6732	-0.23014	0.1822	0.999863	no	15.1475	15.3863	0.0225695	0.8575	0.999462	no	19.3921	12.6493	-0.616413	0.00045	0.00792336	yes
DENND1B	chr1:197473878-197744623	11.4605	10.5368	-0.121239	0.4736	0.999863	no	10.5879	9.9638	-0.0876463	0.48375	0.999462	no	12.4933	8.64778	-0.530756	0.0033	0.0395335	yes
MINOS1	chr1:19923470-19984949	15.8168	16.3765	0.0501691	0.79095	0.999863	no	17.4278	16.4837	-0.0803459	0.5666	0.999462	no	14.9566	21.9372	0.552601	0.004	0.0462587	yes
PPFIA4	chr1:203020310-203047864	5.49143	5.79965	0.078782	0.6481	0.999863	no	6.75667	6.96464	0.0437363	0.72015	0.999462	no	8.4937	5.58275	-0.605417	0.0005	0.0086261	yes
MYBPH	chr1:203136938-203144942	7.95054	9.9176	0.318938	0.09215	0.999863	no	8.67402	11.2352	0.373249	0.0053	0.176359	no	8.48599	15.6182	0.880077	5e-05	0.00120857	yes
PIK3C2B	chr1:204391757-204459474	1.85919	2.16736	0.221266	0.2265	0.999863	no	1.84442	2.45869	0.414726	0.00195	0.0825656	no	1.94208	3.55585	0.872593	5e-05	0.00120857	yes
CDK18	chr1:205473683-205501921	4.34903	4.89139	0.169553	0.36525	0.999863	no	4.68608	5.419	0.209644	0.115	0.999462	no	4.91843	10.1086	1.03931	5e-05	0.00120857	yes
SLC45A3	chr1:205626980-205649630	1.86946	2.12653	0.185879	0.38475	0.999863	no	2.24215	2.61638	0.222692	0.1215	0.999462	no	2.15702	3.63413	0.752574	0.0004	0.00720053	yes
MAPKAPK2	chr1:206858364-206907630	65.9158	71.9469	0.126309	0.41415	0.999863	no	70.1082	73.5489	0.0691201	0.53525	0.999462	no	61.1553	83.8336	0.45505	0.00395	0.0457578	yes
FAIM3	chr1:207070787-207095378	0.427498	0.466813	0.126927	0.6967	0.999863	no	0.373392	0.457758	0.293897	0.20875	0.999462	no	0.331005	0.857954	1.37405	0.0009	0.014251	yes
MUL1	chr1:20825940-20834674	10.9083	11.3699	0.0597977	0.73115	0.999863	no	10.5189	11.1382	0.0825334	0.51085	0.999462	no	9.25326	15.2175	0.717693	5e-05	0.00120857	yes
CDA	chr1:20915443-20945400	6.67766	7.50965	0.169403	0.4476	0.999863	no	6.12119	7.93129	0.373745	0.01685	0.40595	no	7.08925	16.5493	1.22306	5e-05	0.00120857	yes
LAMB3	chr1:209788217-209825820	3.01455	3.39495	0.171445	0.37715	0.999863	no	2.88562	3.91511	0.440172	0.0014	0.0626544	no	2.87107	10.6264	1.888	5e-05	0.00120857	yes
HSD11B1	chr1:209859524-209908295	8.992	8.77815	-0.0347251	0.85925	0.999863	no	8.18549	8.98486	0.134428	0.33035	0.999462	no	8.14266	25.1143	1.62494	5e-05	0.00120857	yes
KIF17	chr1:20990506-21044317	16.991	17.5157	0.0438774	0.7836	0.999863	no	19.0963	19.8185	0.0535498	0.6464	0.999462	no	21.2152	14.1585	-0.583427	0.00035	0.00647074	yes
LPGAT1	chr1:211916798-212004114	12.5924	13.5919	0.110203	0.4769	0.999863	no	12.5583	14.1589	0.173067	0.12885	0.999462	no	12.7747	30.2831	1.24523	5e-05	0.00120857	yes
MARC1	chr1:220960038-220987741	9.75537	9.21664	-0.0819563	0.6481	0.999863	no	9.54638	9.45928	-0.0132238	0.9161	0.999462	no	10.2112	14.6174	0.51753	0.0042	0.0480838	yes
DUSP10	chr1:221874763-221915516	15.6493	22.8181	0.544081	0.001	0.235033	no	16.4653	21.1206	0.359222	0.00425	0.150635	no	17.3188	29.8543	0.7856	5e-05	0.00120857	yes
CAPN2	chr1:223889294-223963720	145.709	142.392	-0.0332211	0.831	0.999863	no	140.245	129.863	-0.110959	0.32545	0.999462	no	138.571	99.566	-0.476899	0.0022	0.0290243	yes
C1QA	chr1:22963117-22966175	1.41594	1.56504	0.14444	0.65485	0.999863	no	1.22965	1.39756	0.184664	0.41385	0.999462	no	1.66685	3.5484	1.09004	0.00095	0.0148707	yes
GALNT2	chr1:230202955-230417875	19.0596	18.8883	-0.013031	0.9332	0.999863	no	17.6629	19.5962	0.149853	0.18495	0.999462	no	17.5836	25.6299	0.543592	0.0008	0.0129218	yes
PCNXL2	chr1:233119881-233431459	1.07862	1.13771	0.0769434	0.71115	0.999863	no	1.14854	1.28673	0.16391	0.2515	0.999462	no	1.40244	2.16404	0.625789	0.0017	0.023564	yes
GNG4	chr1:235710984-235814054	4.85931	4.73389	-0.0377253	0.8279	0.999863	no	4.94851	5.11864	0.0487671	0.6954	0.999462	no	5.24164	3.55582	-0.559835	0.0022	0.0290243	yes
ZNF436	chr1:23685940-23698330	3.48196	3.46756	-0.00598049	0.975	0.999863	no	4.12577	3.527	-0.226218	0.10735	0.999462	no	5.30919	2.53918	-1.06413	5e-05	0.00120857	yes
ZBTB18	chr1:244214560-244220778	20.8407	19.3435	-0.107551	0.4965	0.999863	no	22.2387	17.4227	-0.3521	0.0023	0.0931994	no	20.8786	14.895	-0.487196	0.00315	0.0381711	yes
EFCAB2	chr1:245133170-245288530	23.3508	22.1082	-0.0788869	0.66825	0.999863	no	24.0571	23.064	-0.0608172	0.66875	0.999462	no	24.2312	39.7826	0.715274	0.0001	0.00223912	yes
SMYD3	chr1:245912641-246670644	129.971	128.102	-0.0208928	0.8893	0.999863	no	132.836	120.693	-0.13831	0.2119	0.999462	no	131.824	75.0373	-0.812934	5e-05	0.00120857	yes
CD52	chr1:26608772-26647014	49.6146	66.3616	0.419584	0.16805	0.999863	no	60.4256	67.5781	0.161396	0.4161	0.999462	no	51.4313	160.356	1.64055	5e-05	0.00120857	yes
UBXN11	chr1:26608772-26647014	12.6116	14.0743	0.158317	0.53985	0.999863	no	14.4641	16.3566	0.177398	0.34045	0.999462	no	12.8008	27.5939	1.10811	5e-05	0.00120857	yes
FGR	chr1:27938800-27961727	13.8287	16.266	0.234193	0.16785	0.999863	no	14.8485	16.1351	0.119882	0.31875	0.999462	no	11.8479	26.358	1.15361	5e-05	0.00120857	yes
FABP3	chr1:31838099-31845923	0.277027	0.454747	0.715037	0.206	0.999863	no	0.395796	0.390266	-0.0202988	0.94855	0.999462	no	0.392019	2.2891	2.54578	0.00015	0.00324194	yes
MARCKSL1	chr1:32799429-32801840	18.3535	18.6896	0.0261773	0.87975	0.999863	no	18.2032	17.5088	-0.0561152	0.6527	0.999462	no	15.9066	10.7508	-0.56518	0.0028	0.0347612	yes
RNF19B	chr1:33402049-33430286	12.6522	12.737	0.00963004	0.9562	0.999863	no	12.5691	11.7867	-0.092728	0.4462	0.999462	no	13.497	8.94131	-0.59408	0.0008	0.0129218	yes
MEGF6	chr1:3404505-3528059	3.21184	3.37713	0.0723973	0.6743	0.999863	no	3.90225	4.34547	0.155206	0.201	0.999462	no	4.14171	2.42056	-0.774885	5e-05	0.00120857	yes
EVA1B	chr1:36787631-36789755	4.02405	3.54465	-0.183003	0.4733	0.999863	no	4.9269	4.6976	-0.0687576	0.67685	0.999462	no	4.46855	2.49098	-0.843095	0.00325	0.0391402	yes
CSF3R	chr1:36931643-36948915	53.6839	53.2749	-0.0110327	0.9439	0.999863	no	56.6357	62.758	0.148088	0.18765	0.999462	no	61.3348	91.5963	0.578583	0.0004	0.00720053	yes
MYCL1	chr1:40361095-40367687	15.4632	17.6834	0.193554	0.24275	0.999863	no	15.955	17.4624	0.130248	0.2701	0.999462	no	13.6603	23.8232	0.802375	5e-05	0.00120857	yes
RIMKLA	chr1:42846467-42889900	0.49959	0.529583	0.0841136	0.70835	0.999863	no	0.601162	0.648618	0.109615	0.462	0.999462	no	0.745134	1.23764	0.732018	0.00105	0.0160683	yes
CCDC30	chr1:43000559-43120335	1.22606	1.27782	0.0596637	0.80915	0.999863	no	1.34161	1.6121	0.264979	0.1089	0.999462	no	1.52854	2.67191	0.805715	0.00095	0.0148707	yes
SLC2A1	chr1:43391045-43449029	86.9492	78.2972	-0.151212	0.3178	0.999863	no	111.808	99.4948	-0.168327	0.1433	0.999462	no	140.486	98.8285	-0.507425	0.0024	0.0311227	yes
PTPRF	chr1:43996546-44089343	34.0272	33.1353	-0.0383193	0.80235	0.999863	no	30.7768	33.1714	0.108096	0.32705	0.999462	no	34.8339	18.6409	-0.90202	5e-05	0.00120857	yes
C1orf228	chr1:45140393-45191263	88.9676	86.0157	-0.04868	0.7521	0.999863	no	103.682	97.2448	-0.0924726	0.41395	0.999462	no	89.1308	58.6934	-0.602725	0.00025	0.00496408	yes
SPATA6	chr1:48761043-48937876	0.57908	0.671583	0.213804	0.4093	0.999863	no	0.625454	0.639891	0.0329238	0.84925	0.999462	no	0.821591	0.429745	-0.93494	0.00125	0.0184281	yes
BEND5	chr1:48998526-50489626	1.47803	1.40471	-0.0734038	0.8116	0.999863	no	2.02148	1.95802	-0.0460112	0.82275	0.999462	no	3.89293	2.12801	-0.871349	0.00195	0.0262578	yes
SSBP3	chr1:54692194-54872092	22.6064	21.4089	-0.0785197	0.62935	0.999863	no	21.9864	23.1863	0.0766639	0.5222	0.999462	no	23.5672	16.6862	-0.498124	0.00345	0.0410073	yes
DNAJC11	chr1:6684924-6761966	18.8345	18.4278	-0.0314946	0.85745	0.999863	no	18.1418	18.0956	-0.00367744	0.9777	0.999462	no	17.6873	27.0353	0.612134	0.00055	0.00937055	yes
WLS	chr1:68167148-68698284	1.49614	1.06313	-0.492923	0.0837	0.999863	no	1.24455	1.2152	-0.0344312	0.86085	0.999462	no	1.13702	3.35405	1.56065	5e-05	0.00120857	yes
NEGR1	chr1:71868624-72748277	0.459349	0.50392	0.133604	0.61075	0.999863	no	0.412029	0.454926	0.142886	0.45095	0.999462	no	0.413471	3.29475	2.99431	5e-05	0.00120857	yes
DNAJB4	chr1:78470635-78482995	3.95935	3.90544	-0.0197801	0.9217	0.999863	no	3.20607	3.46459	0.111879	0.44795	0.999462	no	3.56008	2.00007	-0.831856	0.00055	0.00937055	yes
MCOLN2	chr1:85391265-85462796	57.8304	55.9168	-0.0485461	0.7572	0.999863	no	61.8437	50.3774	-0.295851	0.00805	0.243254	no	51.5368	37.516	-0.458097	0.0041	0.0470966	yes
MCOLN3	chr1:85483764-85514223	6.07985	5.54333	-0.133285	0.47705	0.999863	no	6.29694	5.52229	-0.189385	0.14845	0.999462	no	6.7014	4.02462	-0.735611	0.00025	0.00496408	yes
GBP2	chr1:89573309-89591799	6.0758	6.19483	0.02799	0.8831	0.999863	no	6.38032	5.65788	-0.173367	0.19585	0.999462	no	4.95738	7.50841	0.59893	0.00195	0.0262578	yes
ZNF326	chr1:90460677-90494094	11.758	12.0467	0.0349968	0.84475	0.999863	no	11.5216	11.0744	-0.0571138	0.6563	0.999462	no	13.2659	8.53137	-0.636875	0.0005	0.0086261	yes
GFI1	chr1:92940317-92952433	89.3742	69.9723	-0.353075	0.02375	0.999863	no	85.228	79.47	-0.100917	0.36295	0.999462	no	94.0461	57.4823	-0.710251	5e-05	0.00120857	yes
GOT1	chr10:101156626-101190530	7.9935	8.42276	0.0754658	0.6846	0.999863	no	7.91197	7.56049	-0.0655563	0.62415	0.999462	no	7.25963	15.6068	1.10421	5e-05	0.00120857	yes
SCD	chr10:102106771-102124588	283.835	286.927	0.0156336	0.9236	0.999863	no	264.046	239.353	-0.141648	0.2226	0.999462	no	360.46	238.367	-0.596656	0.00045	0.00792336	yes
NEURL	chr10:105253734-105352309	2.60233	2.55903	-0.0242115	0.89645	0.999863	no	2.83745	2.68441	-0.079991	0.54815	0.999462	no	2.27898	3.53017	0.631354	0.0013	0.0190829	yes
ADD3	chr10:111705316-111895323	4.19486	4.12303	-0.0249167	0.894	0.999863	no	4.32107	4.46086	0.045935	0.7282	0.999462	no	5.42693	3.4994	-0.633028	0.0007	0.0114966	yes
MXI1	chr10:111967362-112047123	19.0734	16.2972	-0.226933	0.15885	0.999863	no	22.2249	19.5784	-0.182911	0.12255	0.999462	no	30.1262	16.3452	-0.88215	5e-05	0.00120857	yes
NHLRC2	chr10:115614390-115672265	3.27944	3.13437	-0.0652736	0.712	0.999863	no	2.95989	2.88783	-0.0355612	0.7857	0.999462	no	3.8292	2.61482	-0.550328	0.00315	0.0381711	yes
SFXN4	chr10:120900424-120925204	13.2147	14.078	0.0912976	0.6138	0.999863	no	14.1152	15.001	0.0878143	0.49795	0.999462	no	12.0258	29.6318	1.30101	5e-05	0.00120857	yes
DHTKD1	chr10:12110933-12165224	10.5056	10.1881	-0.0442747	0.7851	0.999863	no	11.1425	9.73962	-0.19413	0.0945	0.999462	no	12.2401	7.32302	-0.741104	5e-05	0.00120857	yes
BAG3	chr10:121410881-121437329	15.9041	19.2771	0.277486	0.08895	0.999863	no	15.6039	19.4866	0.320574	0.00625	0.199972	no	13.7049	20.0809	0.551129	0.0015	0.0214212	yes
TACC2	chr10:123748688-124014057	2.15348	2.40517	0.159469	0.432	0.999863	no	2.23914	2.63067	0.232489	0.103	0.999462	no	1.9239	2.99313	0.637623	0.00245	0.031651	yes
FAM53B	chr10:126307862-126432930	7.52175	7.79585	0.0516378	0.75505	0.999863	no	7.48805	8.87843	0.245715	0.035	0.638671	no	7.07037	9.88302	0.483167	0.00415	0.0475512	yes
OPTN	chr10:13142081-13180276	9.31317	9.30936	-0.000589633	0.9972	0.999863	no	10.2668	8.20196	-0.323947	0.0101	0.287393	no	10.7263	6.14932	-0.802654	5e-05	0.00120857	yes
STK32C	chr10:134020995-134121477	11.3278	10.7318	-0.0779728	0.6465	0.999863	no	11.8797	10.5151	-0.176039	0.16345	0.999462	no	11.2161	6.05421	-0.889557	5e-05	0.00120857	yes
LRRC27	chr10:134145613-134195010	3.95608	3.5705	-0.147947	0.58255	0.999863	no	4.48149	3.66609	-0.289739	0.1261	0.999462	no	5.09808	2.80757	-0.86063	0.0024	0.0311227	yes
C10orf91	chr10:134258713-134261825	48.1206	45.8254	-0.0705059	0.6874	0.999863	no	48.5958	57.866	0.251885	0.04355	0.722777	no	58.8702	33.6637	-0.806344	5e-05	0.00120857	yes
INPP5A	chr10:134351352-134596984	10.6318	10.0608	-0.0796355	0.6421	0.999863	no	11.3959	10.6582	-0.0965426	0.426	0.999462	no	11.0575	7.67885	-0.526057	0.00275	0.0342336	yes
VIM	chr10:17270257-17279592	144.644	134.66	-0.103191	0.5064	0.999863	no	140.458	128.424	-0.129226	0.24695	0.999462	no	179.57	76.048	-1.23956	5e-05	0.00120857	yes
SKIDA1	chr10:21802408-21814611	8.03184	7.08081	-0.181816	0.2664	0.999863	no	8.51182	8.49198	-0.0033671	0.9784	0.999462	no	9.55018	6.58231	-0.536934	0.00145	0.0208377	yes
OTUD1	chr10:23728197-23731310	5.08514	4.68999	-0.1167	0.5365	0.999863	no	5.32605	4.98316	-0.0960063	0.4663	0.999462	no	5.15747	3.45049	-0.579865	0.00375	0.0438869	yes
ZEB1	chr10:31608100-31818742	6.52044	5.85935	-0.154228	0.35735	0.999863	no	7.0132	6.0005	-0.224992	0.063	0.887921	no	8.02551	4.74468	-0.758282	5e-05	0.00120857	yes
KLF6	chr10:3818187-3827473	9.88863	9.24605	-0.0969341	0.5525	0.999863	no	10.3283	8.45506	-0.288721	0.01385	0.354189	no	12.0057	7.79477	-0.623138	0.0003	0.00576447	yes
HSD17B7P2	chr10:38645307-38667433	5.55088	6.48677	0.224782	0.2888	0.999863	no	6.95378	5.55894	-0.322987	0.02635	0.533871	no	10.0252	5.684	-0.818651	0.0002	0.004127	yes
RET	chr10:43572516-43625797	112.135	117.753	0.0705294	0.64845	0.999863	no	108.065	123.76	0.195651	0.0892	0.999462	no	104.676	157.651	0.590803	0.00035	0.00647074	yes
RASGEF1A	chr10:43689983-43762367	0.369289	0.244365	-0.595712	1	1	no	0.324932	0.40447	0.315892	0.1722	0.999462	no	0.667303	0.218441	-1.6111	0.00055	0.00937055	yes
ALOX5	chr10:45869623-45941567	16.0563	18.1093	0.173596	0.29535	0.999863	no	18.2017	18.5318	0.0259327	0.82945	0.999462	no	17.0659	33.3571	0.966879	5e-05	0.00120857	yes
AKR1C1	chr10:5005453-5020158	1.22658	1.32132	0.107337	0.73245	0.999863	no	1.33968	0.890913	-0.588536	0.00885	0.260201	no	1.18968	0.422717	-1.49281	0.0033	0.0395335	yes
AKR1C2	chr10:5029967-5060225	3.57912	3.75097	0.0676587	0.7971	0.999863	no	3.292	2.39092	-0.461403	0.02385	0.501915	no	2.7359	0.607071	-2.17208	5e-05	0.00120857	yes
OGDHL	chr10:50942686-50970425	0.514702	0.629659	0.290831	0.30485	0.999863	no	0.664268	0.593883	-0.161587	0.40425	0.999462	no	0.595707	1.26187	1.08289	0.00035	0.00647074	yes
AGAP7	chr10:51464150-51486327	0.202646	0.322365	0.669737	1	1	no	0.149795	0.33735	1.17126	1	1	no	0.183695	1.74902	3.25116	5e-05	0.00120857	yes
FAM21A	chr10:51827683-51893269	0.912782	1.00008	0.131773	0.56525	0.999863	no	0.76263	1.04535	0.454928	0.00565	0.184107	no	0.743744	1.37351	0.884989	0.0005	0.0086261	yes
CISD1	chr10:60028861-60049019	3.88208	4.17071	0.103464	0.6116	0.999863	no	4.26688	4.59923	0.10821	0.43965	0.999462	no	4.56617	7.55328	0.726119	0.00045	0.00792336	yes
CCDC6	chr10:61548505-61666414	9.30741	9.88209	0.0864369	0.5929	0.999863	no	9.00483	9.39269	0.0608397	0.60095	0.999462	no	9.18932	12.7718	0.474931	0.00435	0.0495111	yes
SRGN	chr10:70847827-70864567	3329.67	3868.38	0.21635	0.2039	0.999863	no	3241.26	3921.75	0.274942	0.03075	0.585285	no	3219.49	5190.74	0.689107	0.0001	0.00223912	yes
HK1	chr10:71029755-71161637	18.6243	19.6952	0.0806597	0.60825	0.999863	no	18.3398	18.9312	0.0457901	0.69415	0.999462	no	17.2662	28.3953	0.717708	5e-05	0.00120857	yes
PPA1	chr10:71962585-71993190	80.0656	80.069	6.12216e-05	0.9991	0.999863	no	78.8739	81.8182	0.0528741	0.64575	0.999462	no	78.2121	138.694	0.826439	5e-05	0.00120857	yes
UNC5B	chr10:72972291-73062635	0.657957	0.724338	0.138669	0.54155	0.999863	no	0.592038	0.598803	0.0163899	0.9228	0.999462	no	0.700503	0.417869	-0.745341	0.0043	0.0490645	yes
MYOZ1	chr10:75391369-75401515	2.64859	2.1999	-0.267788	0.2883	0.999863	no	2.64499	2.57884	-0.0365395	0.82785	0.999462	no	2.62656	1.06524	-1.302	0.00015	0.00324194	yes
CAMK2G	chr10:75572258-75634349	13.2725	12.0232	-0.142611	0.3894	0.999863	no	13.3868	12.51	-0.0977302	0.41135	0.999462	no	13.533	9.24872	-0.549155	0.00135	0.0197112	yes
COMTD1	chr10:76993728-76995770	6.89762	5.22282	-0.401269	0.0795	0.999863	no	6.30024	6.7801	0.1059	0.4984	0.999462	no	5.84993	11.5125	0.976704	5e-05	0.00120857	yes
ZNF503	chr10:77157602-77168740	8.9438	7.54795	-0.244803	0.1795	0.999863	no	8.66491	8.6498	-0.00251837	0.9859	0.999462	no	8.56752	5.80256	-0.562188	0.0036	0.0424583	yes
ZCCHC24	chr10:81142082-81205383	5.29476	6.07624	0.198612	0.2497	0.999863	no	5.14533	5.90329	0.198255	0.114	0.999462	no	3.74334	7.78608	1.05657	5e-05	0.00120857	yes
SFTPD	chr10:81697495-81708861	3.62704	3.16033	-0.198717	0.435	0.999863	no	3.5196	3.03234	-0.214982	0.2091	0.999462	no	3.05751	1.62939	-0.908024	0.00325	0.0391402	yes
GHITM	chr10:85899184-85913311	75.8629	75.7198	-0.0027231	0.9853	0.999863	no	72.0782	71.2335	-0.0170086	0.8787	0.999462	no	72.0064	101.751	0.498845	0.0015	0.0214212	yes
CDHR1	chr10:85954411-85979376	2.73293	2.89272	0.0819756	0.6742	0.999863	no	3.00538	3.18884	0.0854838	0.5274	0.999462	no	5.4551	3.33144	-0.71146	0.00015	0.00324194	yes
HTR7	chr10:92500575-92617671	2.73232	2.2954	-0.251381	0.22445	0.999863	no	2.34054	2.01283	-0.217611	0.14455	0.999462	no	2.10759	1.08234	-0.961436	0.00015	0.00324194	yes
PGAM1	chr10:99186026-99193198	184.871	186.068	0.00931267	0.9517	0.999863	no	186.302	191.278	0.0380335	0.72815	0.999462	no	192.328	268.776	0.482836	0.00315	0.0381711	yes
MSANTD4	chr11:105878628-105892954	6.19741	5.77513	-0.101811	0.5604	0.999863	no	5.26069	5.62696	0.0971023	0.4437	0.999462	no	5.26955	8.20394	0.638636	0.0003	0.00576447	yes
DLAT	chr11:111895537-111944895	12.4015	11.4173	-0.119299	0.4697	0.999863	no	10.5613	10.9201	0.0481997	0.68465	0.999462	no	11.3143	17.146	0.599726	0.0003	0.00576447	yes
SDHD	chr11:111957570-111966518	71.0992	71.3573	0.00522714	0.9736	0.999863	no	65.6947	68.1301	0.0525169	0.641	0.999462	no	67.5525	135.39	1.00304	5e-05	0.00120857	yes
NCAM1	chr11:112831968-113149158	15.6855	15.5623	-0.0113721	0.9416	0.999863	no	15.1159	14.1033	-0.100028	0.39515	0.999462	no	15.594	9.64804	-0.692687	5e-05	0.00120857	yes
CADM1	chr11:115044344-115375241	1.18896	1.28912	0.116683	0.6103	0.999863	no	1.06965	0.900609	-0.248164	0.12835	0.999462	no	1.15688	0.507104	-1.18988	0.0001	0.00223912	yes
AMICA1	chr11:118064441-118095809	1.14577	1.14139	-0.00552284	0.98425	0.999863	no	1.23263	1.10586	-0.156568	0.41815	0.999462	no	1.57449	0.783719	-1.00648	0.0025	0.0321452	yes
PHLDB1	chr11:118477212-118528748	6.42296	6.52313	0.0223246	0.89805	0.999863	no	6.45795	6.61093	0.0337773	0.7841	0.999462	no	6.13835	4.14338	-0.567044	0.00115	0.0173082	yes
LOC100499227	chr11:119252487-119369944	0.523098	0.697509	0.415132	0.36905	0.999863	no	0.843543	1.22836	0.5422	0.0374	0.658669	no	1.10047	3.28198	1.57644	5e-05	0.00120857	yes
TMEM136	chr11:120195837-120204388	0.654951	0.777718	0.247861	0.34075	0.999863	no	0.727495	0.879651	0.273994	0.1097	0.999462	no	0.66132	1.536	1.21576	5e-05	0.00120857	yes
SORL1	chr11:121322911-121504471	5.98124	5.64255	-0.0840974	0.59175	0.999863	no	5.16898	5.71918	0.145929	0.21115	0.999462	no	6.91955	4.01042	-0.786926	5e-05	0.00120857	yes
ST3GAL4	chr11:126225539-126284536	44.5941	38.0672	-0.228306	0.15545	0.999863	no	43.8961	39.5745	-0.149523	0.2015	0.999462	no	47.3501	27.6625	-0.775436	5e-05	0.00120857	yes
C11orf45	chr11:128761312-128787951	4.33027	4.20481	-0.0424171	0.82995	0.999863	no	4.53319	4.28595	-0.0809103	0.57745	0.999462	no	4.69315	2.85477	-0.717183	0.0014	0.020376	yes
PDE3B	chr11:14665268-14893604	25.8763	24.3277	-0.0890312	0.5612	0.999863	no	24.2595	22.1063	-0.134093	0.2309	0.999462	no	28.1179	17.1774	-0.71098	0.0001	0.00223912	yes
CTSD	chr11:1490684-1785501	124.135	128.362	0.0483012	0.7654	0.999863	no	124.773	135.665	0.120737	0.30625	0.999462	no	108.083	263.654	1.2865	5e-05	0.00120857	yes
NUCB2	chr11:17298285-17353070	221.66	218.54	-0.0204499	0.89355	0.999863	no	208.35	194.9	-0.0962787	0.3832	0.999462	no	224.866	157.437	-0.514292	0.0008	0.0129218	yes
TMEM86A	chr11:18720350-18747777	0.55981	0.863603	0.625432	0.02555	0.999863	no	0.58873	0.687369	0.223479	0.2692	0.999462	no	0.552035	1.24955	1.17858	0.00025	0.00496408	yes
LSP1	chr11:1874199-1913493	36.2128	38.863	0.1019	0.54315	0.999863	no	35.2279	37.1633	0.0771623	0.5171	0.999462	no	48.4234	24.0854	-1.00754	5e-05	0.00120857	yes
CDKN1C	chr11:2904447-2906995	3.11369	2.53345	-0.297522	0.1927	0.999863	no	2.78809	2.78137	-0.00347767	0.9831	0.999462	no	2.54043	0.994099	-1.35361	5e-05	0.00120857	yes
IFITM1	chr11:313990-315272	52.1952	53.0657	0.0238612	0.89195	0.999863	no	57.1413	44.8928	-0.34805	0.00465	0.162773	no	40.8871	19.2078	-1.08995	5e-05	0.00120857	yes
EIF3M	chr11:32605312-32816187	161.874	163.588	0.0151983	0.9231	0.999863	no	158.715	160.618	0.0171933	0.8813	0.999462	no	158.826	225.11	0.503183	0.0027	0.0338887	yes
CAT	chr11:34460471-34493607	213.902	200.405	-0.0940271	0.53415	0.999863	no	183.763	186.97	0.0249633	0.8187	0.999462	no	230.969	145.254	-0.669124	0.0002	0.004127	yes
LDLRAD3	chr11:35965611-36252841	0.927541	1.00111	0.110121	0.6736	0.999863	no	1.0161	0.792446	-0.358662	0.0524	0.803418	no	1.09798	0.437443	-1.32769	0.00025	0.00496408	yes
TP53I11	chr11:44785975-44972857	9.3635	10.1074	0.110298	0.50935	0.999863	no	10.3298	11.4186	0.144563	0.2377	0.999462	no	8.90561	14.1979	0.672891	0.0026	0.0330582	yes
LRP4	chr11:46867961-46940173	0.821963	0.79486	-0.0483736	0.82035	0.999863	no	0.696218	0.599402	-0.216015	0.1726	0.999462	no	0.660912	0.313259	-1.0771	0.00015	0.00324194	yes
DTX4	chr11:58939811-58980494	2.16841	1.9324	-0.166248	0.65535	0.999863	no	2.07076	1.61761	-0.356303	0.19325	0.999462	no	2.42108	1.03803	-1.2218	0.0004	0.00720053	yes
TCN1	chr11:59620280-59634041	2.2249	2.01242	-0.144808	0.57425	0.999863	no	2.17506	1.81765	-0.258981	0.14905	0.999462	no	1.56631	0.311402	-2.33052	0.00015	0.00324194	yes
MS4A3	chr11:59824100-59838588	96.2977	90.9588	-0.0822872	0.6028	0.999863	no	94.4187	90.1291	-0.0670798	0.5624	0.999462	no	110.637	73.8591	-0.582982	0.00065	0.0108052	yes
MS4A4A	chr11:60048013-60076445	9.85005	9.38814	-0.0692916	0.71255	0.999863	no	9.63232	9.29397	-0.0515877	0.70375	0.999462	no	10.233	6.80846	-0.587822	0.00305	0.0372896	yes
IRF7	chr11:612554-615999	28.1223	28.7776	0.0332342	0.8379	0.999863	no	32.2868	25.9927	-0.312838	0.00855	0.252958	no	23.0276	12.9067	-0.835245	5e-05	0.00120857	yes
FADS3	chr11:61640997-61659006	12.6959	12.5418	-0.0176143	0.9192	0.999863	no	13.6632	12.0487	-0.181421	0.15625	0.999462	no	10.7748	5.95353	-0.855845	5e-05	0.00120857	yes
RAB3IL1	chr11:61664767-61687741	12.9729	11.2302	-0.208118	0.22545	0.999863	no	13.6737	10.5246	-0.377644	0.0022	0.0901809	no	10.7188	5.89871	-0.861666	5e-05	0.00120857	yes
SCGB1A1	chr11:62186506-62190678	0.518081	0.0661864	-2.96857	0.2541	0.999863	no	0.522001	0.148712	-1.81153	0.04945	0.775301	no	1.02301	0	-inf	0.0001	0.00223912	yes
AHNAK	chr11:62201013-62314332	61.6808	60.5598	-0.0264616	0.86985	0.999863	no	60.2708	54.679	-0.140473	0.22635	0.999462	no	65.7926	34.7526	-0.920806	5e-05	0.00120857	yes
NUDT22	chr11:63993729-63997488	30.5736	30.6494	0.00357301	0.9835	0.999863	no	34.5143	37.2817	0.111275	0.37025	0.999462	no	30.0733	43.9996	0.549007	0.0017	0.023564	yes
ESRRA	chr11:64073043-64085033	28.766	28.2533	-0.0259496	0.91165	0.999863	no	28.1768	30.1157	0.0960087	0.5787	0.999462	no	23.3096	45.716	0.971777	5e-05	0.00120857	yes
LOC100996455	chr11:64216528-64219128	2.3152	2.24331	-0.045508	0.83805	0.999863	no	2.50773	1.8994	-0.400838	0.0121	0.324702	no	2.86509	1.08467	-1.40133	5e-05	0.00120857	yes
MALAT1	chr11:65265232-65273939	39.1993	41.159	0.0703796	0.65185	0.999863	no	47.5456	40.8457	-0.21913	0.0501	0.781162	no	50.388	31.5919	-0.673527	5e-05	0.00120857	yes
FAM89B	chr11:65339819-65341669	17.6541	18.3562	0.056263	0.74335	0.999863	no	18.9396	22.5003	0.248543	0.0486	0.769584	no	15.6546	23.7137	0.599135	0.00085	0.0135534	yes
EHBP1L1	chr11:65343508-65360116	35.8908	41.1779	0.198257	0.20155	0.999863	no	40.2536	47.647	0.243268	0.0294	0.571905	no	37.3134	59.4617	0.672265	5e-05	0.00120857	yes
SIPA1	chr11:65405577-65418391	41.1626	40.9985	-0.00576566	0.9695	0.999863	no	42.6059	49.5227	0.217035	0.05215	0.801636	no	39.5502	60.2978	0.608418	5e-05	0.00120857	yes
AP5B1	chr11:65541368-65548062	12.4606	13.3771	0.102391	0.5149	0.999863	no	12.9611	14.0943	0.120923	0.2833	0.999462	no	11.1181	16.678	0.585031	0.00025	0.00496408	yes
NPAS4	chr11:66188474-66194177	0.465507	0.467118	0.00498272	0.9774	0.999863	no	0.613584	0.4574	-0.423807	0.0418	0.7071	no	0.766685	0.295635	-1.37481	0.0013	0.0190829	yes
NDUFV1	chr11:67374322-67380012	74.0774	72.0899	-0.039237	0.80295	0.999863	no	80.7017	81.629	0.0164822	0.8847	0.999462	no	72.523	113.224	0.642665	5e-05	0.00120857	yes
NDUFS8	chr11:67798083-67804114	66.8025	64.8766	-0.042205	0.7977	0.999863	no	71.7182	73.1371	0.0282643	0.8099	0.999462	no	58.6852	87.8298	0.581714	0.00045	0.00792336	yes
MRPL21	chr11:68658745-68671303	55.3531	55.5201	0.00434681	0.98025	0.999863	no	57.2679	54.0395	-0.0837124	0.50215	0.999462	no	52.4456	75.2572	0.52101	0.00245	0.031651	yes
CCND1	chr11:69455872-69469242	0.898558	0.924385	0.0408827	0.86565	0.999863	no	1.11198	0.939178	-0.243664	0.1336	0.999462	no	1.09538	0.599416	-0.869807	0.00165	0.0230814	yes
NUMA1	chr11:71709957-71823822	43.8939	48.5351	0.145009	0.42075	0.999863	no	42.17	53.6478	0.347303	0.00815	0.244708	no	42.3053	68.9247	0.704181	0.00015	0.00324194	yes
P2RY2	chr11:72929343-72947395	40.4625	40.5813	0.00423308	0.98065	0.999863	no	41.3453	40.7404	-0.0212659	0.8498	0.999462	no	43.635	30.9789	-0.494202	0.00175	0.0241348	yes
RELT	chr11:73087404-73108519	19.5714	23.0016	0.232983	0.14255	0.999863	no	21.0515	25.1375	0.255922	0.0247	0.510683	no	19.1191	27.8646	0.543414	0.00105	0.0160683	yes
UCP2	chr11:73685715-73693889	178.753	173.428	-0.0436311	0.7792	0.999863	no	184.136	185.772	0.0127603	0.91035	0.999462	no	206.038	138.563	-0.572367	0.00035	0.00647074	yes
NEU3	chr11:74699949-74718743	4.19437	4.09288	-0.0353393	0.8558	0.999863	no	3.77978	3.73037	-0.0189841	0.8906	0.999462	no	4.64396	3.07136	-0.596479	0.0027	0.0338887	yes
EFCAB4A	chr11:827584-831991	10.6026	11.8502	0.16049	0.3716	0.999863	no	12.5125	16.5212	0.400947	0.0011	0.0523778	no	13.7063	25.0595	0.870521	5e-05	0.00120857	yes
CD151	chr11:832951-838835	73.0876	75.6027	0.0488103	0.7491	0.999863	no	78.7449	86.466	0.134947	0.23105	0.999462	no	66.2459	92.7074	0.484854	0.0027	0.0338887	yes
GNPTAB	chr12:102139274-102224645	3.89167	3.94784	0.0206739	0.9082	0.999863	no	3.52371	3.7631	0.0948262	0.45655	0.999462	no	3.511	5.32752	0.601581	0.0014	0.020376	yes
DRAM1	chr12:102271104-102317401	5.12374	5.63204	0.136461	0.4571	0.999863	no	5.22362	5.47138	0.0668542	0.60495	0.999462	no	4.11219	14.0135	1.76884	5e-05	0.00120857	yes
CHST11	chr12:104850691-105155792	28.2503	27.2368	-0.052708	0.74015	0.999863	no	27.4674	25.9247	-0.0833902	0.45525	0.999462	no	30.2757	21.9147	-0.466264	0.00365	0.0429369	yes
C12orf75	chr12:105724413-105765296	14.3836	15.165	0.0763201	0.673	0.999863	no	14.5844	13.9436	-0.0648208	0.61075	0.999462	no	16.2812	10.0655	-0.693784	0.0004	0.00720053	yes
CKAP4	chr12:106631658-106641713	25.0591	23.8472	-0.071515	0.65405	0.999863	no	25.3131	21.9588	-0.205087	0.07555	0.962724	no	22.2176	14.9102	-0.575411	0.00045	0.00792336	yes
TMEM119	chr12:108983621-108991894	4.261	4.20243	-0.0199692	0.9161	0.999863	no	3.86114	3.74469	-0.0441797	0.7544	0.999462	no	3.38116	1.83295	-0.88335	0.0002	0.004127	yes
SELPLG	chr12:109015679-109027670	38.3372	36.8385	-0.0575301	0.72055	0.999863	no	37.8064	38.4234	0.0233543	0.84135	0.999462	no	42.6329	26.5963	-0.680741	5e-05	0.00120857	yes
SDS	chr12:113830250-113841692	0.676397	1.00984	0.57819	0.097	0.999863	no	0.688951	0.907838	0.398034	0.08305	0.999462	no	0.482165	1.78071	1.88486	5e-05	0.00120857	yes
TESC	chr12:117476727-117537251	15.2549	13.6223	-0.163302	0.3951	0.999863	no	15.5075	16.1233	0.0561772	0.67115	0.999462	no	15.6358	9.9517	-0.651836	0.00155	0.0220432	yes
SIRT4	chr12:120740123-120751045	1.08684	1.23677	0.186438	0.58385	0.999863	no	0.761319	1.27143	0.739874	0.0038	0.139222	no	0.779195	2.23682	1.52139	0.00035	0.00647074	yes
COX6A1	chr12:120875892-120878545	296.624	287.65	-0.0443168	0.77965	0.999863	no	299.793	300.345	0.00265531	0.98075	0.999462	no	275.976	388.715	0.494172	0.00195	0.0262578	yes
DNAH10	chr12:124247041-124420267	0.26512	0.409851	0.628453	0.00815	0.999863	no	0.313116	0.421729	0.429617	0.0062	0.199274	no	0.283381	0.754546	1.41287	5e-05	0.00120857	yes
SCARB1	chr12:125262173-125348519	48.5096	52.5669	0.115885	0.4547	0.999863	no	47.4779	59.7359	0.331342	0.00335	0.125999	no	47.2903	101.994	1.10887	5e-05	0.00120857	yes
STX2	chr12:131274144-131323819	7.73074	7.73426	0.000657441	0.99575	0.999863	no	8.32533	7.51009	-0.148676	0.2286	0.999462	no	8.74878	6.03779	-0.535061	0.00285	0.0352221	yes
C2CD5	chr12:22601517-22697452	15.1217	16.8867	0.159274	0.31875	0.999863	no	13.8084	17.6395	0.353264	0.002	0.0844299	no	14.3291	20.8416	0.540524	0.00085	0.0135534	yes
BCAT1	chr12:24962957-25102393	4.70273	4.66648	-0.0111634	0.9467	0.999863	no	4.39716	4.31793	-0.0262328	0.82275	0.999462	no	4.14501	6.79514	0.713126	0.0001	0.00223912	yes
LRMP	chr12:25205180-25348094	25.9867	22.4981	-0.207976	0.1938	0.999863	no	24.1509	21.7616	-0.150293	0.2015	0.999462	no	26.9463	16.1327	-0.740099	5e-05	0.00120857	yes
ITPR2	chr12:26488284-26986131	1.46616	1.3236	-0.147576	0.4244	0.999863	no	1.25428	1.29221	0.0429772	0.74405	0.999462	no	1.48865	2.55446	0.779013	5e-05	0.00120857	yes
PPFIBP1	chr12:27677044-27848497	4.09948	3.88173	-0.0787414	0.65625	0.999863	no	3.88904	3.83691	-0.0194667	0.87825	0.999462	no	4.62421	2.87381	-0.686245	0.0002	0.004127	yes
FAR2	chr12:29301935-29488549	6.43704	6.70962	0.0598334	0.73135	0.999863	no	5.88891	7.13701	0.277318	0.02755	0.548749	no	6.73919	12.7568	0.920622	5e-05	0.00120857	yes
SLC6A12	chr12:299242-323371	0.099658	0.0892647	-0.158896	1	1	no	0.100742	0.163885	0.702024	1	1	no	0.107641	1.53769	3.83646	5e-05	0.00120857	yes
KIAA1551	chr12:32112352-32146043	19.3399	17.7018	-0.127682	0.4078	0.999863	no	17.5255	15.4746	-0.179559	0.1156	0.999462	no	18.0404	12.0367	-0.583795	5e-05	0.00120857	yes
FGD4	chr12:32655040-32798984	1.30073	1.18057	-0.139844	0.48015	0.999863	no	1.24073	1.30622	0.0742007	0.58635	0.999462	no	1.57351	0.837528	-0.909779	5e-05	0.00120857	yes
SLC38A2	chr12:46751970-46766645	76.7599	67.1708	-0.192519	0.2064	0.999863	no	75.8204	63.931	-0.246069	0.02845	0.559583	no	81.1628	53.7248	-0.595231	0.0002	0.004127	yes
NDUFA9	chr12:4758263-4796720	11.3383	12.3169	0.119438	0.5163	0.999863	no	11.4935	11.3544	-0.0175606	0.89125	0.999462	no	10.8412	16.3852	0.595867	0.00185	0.0253606	yes
C1QL4	chr12:49726199-49730971	1.78146	1.52503	-0.224223	0.3773	0.999863	no	1.85035	2.19252	0.244786	0.14325	0.999462	no	2.19779	0.829585	-1.40559	5e-05	0.00120857	yes
BIN2	chr12:51674821-51717938	44.5943	44.9672	0.0120168	0.9385	0.999863	no	46.0623	41.8293	-0.139074	0.22015	0.999462	no	50.0091	32.9789	-0.600649	0.0001	0.00223912	yes
ACVR1B	chr12:52345450-52390863	5.13365	6.00535	0.226263	0.19265	0.999863	no	5.38816	6.46969	0.263906	0.0326	0.609827	no	4.89946	9.49514	0.954567	5e-05	0.00120857	yes
RARG	chr12:53604349-53626040	1.94706	1.86137	-0.0649296	0.77535	0.999863	no	2.25607	1.82763	-0.303838	0.05475	0.821462	no	1.86997	0.820513	-1.18842	5e-05	0.00120857	yes
GPR84	chr12:54756228-54758270	1.06865	1.40701	0.396835	0.1895	0.999863	no	1.13554	1.2599	0.149931	0.46865	0.999462	no	0.613634	2.89592	2.23857	5e-05	0.00120857	yes
ITGA7	chr12:56075329-56106089	10.9064	11.2646	0.0466182	0.8499	0.999863	no	12.5335	11.6782	-0.101969	0.53605	0.999462	no	13.0498	7.22351	-0.853257	0.0002	0.004127	yes
METTL7B	chr12:56075329-56106089	38.4349	33.7886	-0.185878	0.3894	0.999863	no	37.579	30.8203	-0.286048	0.09035	0.999462	no	34.4529	19.5678	-0.816149	0.00075	0.0122152	yes
ESYT1	chr12:56521985-56538460	79.1684	75.9545	-0.0597888	0.6926	0.999863	no	78.449	72.2646	-0.118466	0.28275	0.999462	no	73.9836	53.2093	-0.475527	0.0023	0.030169	yes
ATP5B	chr12:57031958-57039852	386.214	372.707	-0.0513566	0.74175	0.999863	no	364.626	369.618	0.0196162	0.85865	0.999462	no	348.654	554.071	0.668274	5e-05	0.00120857	yes
GNS	chr12:65107221-65153226	25.0477	25.7303	0.0387897	0.80725	0.999863	no	23.7941	25.1389	0.0793161	0.484	0.999462	no	25.7301	35.408	0.460622	0.0032	0.0387084	yes
TBC1D30	chr12:65218351-65274798	7.02646	6.95489	-0.0147706	0.9276	0.999863	no	13.9817	11.6106	-0.268094	0.02205	0.481965	no	26.4005	16.2504	-0.700094	5e-05	0.00120857	yes
NINJ2	chr12:673461-772755	12.7245	11.727	-0.117773	0.54745	0.999863	no	11.8296	12.6971	0.102097	0.46085	0.999462	no	11.2936	18.5757	0.71791	0.00025	0.00496408	yes
LAG3	chr12:6881669-6887621	1.01227	1.17716	0.217713	0.45	0.999863	no	1.19336	1.6735	0.487835	0.0093	0.269509	no	0.956086	4.16915	2.12454	5e-05	0.00120857	yes
CPM	chr12:69244955-69357020	14.8584	14.1183	-0.0737085	0.63365	0.999863	no	13.1557	14.0468	0.0945514	0.40705	0.999462	no	14.327	25.7222	0.84428	5e-05	0.00120857	yes
ENO2	chr12:7023613-7032859	3.4846	3.67497	0.0767399	0.70535	0.999863	no	4.62361	4.0917	-0.176319	0.2052	0.999462	no	7.83164	4.70333	-0.735631	0.00035	0.00647074	yes
PTPN6	chr12:7055739-7070479	205.301	235.335	0.196979	0.20275	0.999863	no	223.37	218.902	-0.0291506	0.79405	0.999462	no	154.203	211.577	0.456345	0.00395	0.0457578	yes
C1S	chr12:7167979-7178335	4.01417	4.08069	0.0237103	0.9013	0.999863	no	4.6169	4.27443	-0.111192	0.42035	0.999462	no	4.52429	1.72359	-1.39228	5e-05	0.00120857	yes
GLIPR1	chr12:75874512-75905418	10.0222	11.8197	0.238002	0.34595	0.999863	no	8.36883	11.8831	0.50581	0.00375	0.138105	no	9.67807	19.502	1.01083	0.0002	0.004127	yes
E2F7	chr12:77415025-77459360	6.59363	6.51513	-0.0172787	0.91755	0.999863	no	6.62148	6.12035	-0.11354	0.358	0.999462	no	7.33876	4.72575	-0.634991	0.00025	0.00496408	yes
NAV3	chr12:78225068-78606790	3.49906	3.46918	-0.0123718	0.9414	0.999863	no	2.95958	3.38548	0.193968	0.11115	0.999462	no	3.39036	4.9863	0.556532	0.00145	0.0208377	yes
ALX1	chr12:85674035-85695561	20.6894	16.5887	-0.318696	0.07495	0.999863	no	19.7108	15.7041	-0.327845	0.0117	0.318808	no	18.8407	12.6157	-0.578632	0.00285	0.0352221	yes
SOCS2	chr12:93959403-93970521	1.44327	1.74102	0.270595	0.2744	0.999863	no	1.48211	1.64593	0.151254	0.37365	0.999462	no	1.48194	0.580237	-1.35277	0.0002	0.004127	yes
CLYBL	chr13:100258918-100549388	1.07908	0.980562	-0.138118	0.52845	0.999863	no	0.982812	1.01309	0.0437717	0.77375	0.999462	no	0.976521	1.61818	0.728652	0.0008	0.0129218	yes
ANKRD10	chr13:111530886-111567416	26.9497	29.9465	0.152121	0.33805	0.999863	no	29.9524	31.8251	0.0874922	0.44205	0.999462	no	27.6119	47.5689	0.784729	5e-05	0.00120857	yes
SPATA13	chr13:24734860-24881212	1.47149	1.73699	0.239315	0.2206	0.999863	no	1.58761	1.72	0.115552	0.41365	0.999462	no	1.53837	4.06356	1.40134	5e-05	0.00120857	yes
KATNAL1	chr13:30776766-30881624	2.28323	2.43663	0.0938134	0.59865	0.999863	no	2.47735	2.33425	-0.0858394	0.5094	0.999462	no	2.60676	1.75501	-0.57078	0.00255	0.0325738	yes
FRY	chr13:32605436-32870776	24.74	22.3921	-0.14386	0.353	0.999863	no	24.4802	21.5342	-0.184985	0.0967	0.999462	no	26.0674	18.5558	-0.490375	0.00145	0.0208377	yes
BRCA2	chr13:32889616-32973809	2.75347	2.56166	-0.10417	0.5456	0.999863	no	2.46087	2.3335	-0.0766696	0.53735	0.999462	no	2.78326	1.78338	-0.642164	0.0003	0.00576447	yes
CCNA1	chr13:37005966-37017019	11.0702	9.49772	-0.221028	0.226	0.999863	no	9.81181	7.37981	-0.410935	0.00215	0.0886452	no	9.86627	4.34374	-1.18357	5e-05	0.00120857	yes
DGKH	chr13:42614171-42803891	1.40102	1.4895	0.0883507	0.68525	0.999863	no	1.41465	1.54456	0.126747	0.4019	0.999462	no	2.08254	1.28341	-0.698358	0.0016	0.0225434	yes
SETDB2	chr13:50018428-50069139	13.3594	11.8479	-0.173221	0.27185	0.999863	no	13.1272	10.6945	-0.295695	0.01125	0.308927	no	14.6899	7.80921	-0.91158	5e-05	0.00120857	yes
TRIM13	chr13:50556687-50699677	9.80423	8.83281	-0.150532	0.39635	0.999863	no	9.89073	8.45575	-0.226144	0.0848	0.999462	no	10.5201	6.94366	-0.599382	0.00115	0.0173082	yes
WDFY2	chr13:52158483-52336171	20.394	19.7533	-0.046047	0.7742	0.999863	no	20.7802	19.801	-0.0696375	0.5426	0.999462	no	23.2164	15.5255	-0.580498	0.00035	0.00647074	yes
DOCK9	chr13:99445740-99738660	0.642426	0.634307	-0.018348	0.93325	0.999863	no	0.544899	0.533414	-0.0307327	0.8517	0.999462	no	0.67414	0.407173	-0.727408	0.0036	0.0424583	yes
EVL	chr14:100531750-100610573	60.386	67.0324	0.150646	0.3386	0.999863	no	65.9321	78.6985	0.255355	0.0224	0.485116	no	65.1672	96.4682	0.565907	0.00035	0.00647074	yes
TNFAIP2	chr14:103592663-103603776	34.9437	39.5138	0.177325	0.2552	0.999863	no	36.6064	41.406	0.177743	0.11365	0.999462	no	32.0992	51.7067	0.687814	5e-05	0.00120857	yes
JAG2	chr14:105607317-105635161	7.26886	7.07427	-0.0391477	0.80845	0.999863	no	7.73558	7.40281	-0.063437	0.5914	0.999462	no	7.75352	5.51729	-0.490892	0.0033	0.0395335	yes
ARHGEF40	chr14:21538526-21558036	8.1827	7.28455	-0.167738	0.3041	0.999863	no	8.22676	7.6722	-0.100685	0.3961	0.999462	no	8.5805	4.49973	-0.931223	5e-05	0.00120857	yes
ZNF219	chr14:21558204-21572863	2.87152	2.34923	-0.289627	0.16645	0.999863	no	2.85308	3.14024	0.138359	0.33835	0.999462	no	2.58804	4.21271	0.702886	0.00085	0.0135534	yes
OXA1L	chr14:23235730-23240998	78.6289	78.6509	0.000403188	0.99825	0.999863	no	82.0737	80.8844	-0.0210578	0.8522	0.999462	no	75.1096	110.464	0.556509	0.0004	0.00720053	yes
SLC7A7	chr14:23242431-23289020	9.00715	9.53923	0.0828023	0.64385	0.999863	no	9.95596	8.7831	-0.18083	0.1604	0.999462	no	7.6604	11.5182	0.588418	0.0017	0.023564	yes
AJUBA	chr14:23440409-23451848	2.16396	2.22584	0.0406793	0.8409	0.999863	no	2.4022	2.08532	-0.204084	0.154	0.999462	no	1.93483	1.14921	-0.751564	0.0011	0.0167398	yes
LTB4R	chr14:24774392-24787242	12.7943	15.1577	0.244557	0.33475	0.999863	no	15.4625	19.6575	0.346309	0.0537	0.81222	no	14.3857	25.0955	0.802798	0.0007	0.0114966	yes
ADCY4	chr14:24787554-24804277	2.48226	2.98608	0.266597	0.18665	0.999863	no	3.09306	3.28153	0.0853307	0.5403	0.999462	no	2.78391	4.76071	0.774062	0.0002	0.004127	yes
NFKBIA	chr14:35870715-35873960	55.0411	73.4072	0.415412	0.0093	0.999863	no	53.9929	67.6608	0.32555	0.004	0.144306	no	45.1841	88.3171	0.966877	5e-05	0.00120857	yes
MIS18BP1	chr14:45672392-45722605	24.7915	22.6022	-0.133383	0.3883	0.999863	no	22.0889	21.492	-0.0395186	0.72575	0.999462	no	26.4125	19.0402	-0.472174	0.00345	0.0410073	yes
LGALS3	chr14:55595934-55612148	49.4409	48.9346	-0.0148509	0.9267	0.999863	no	54.7502	44.0398	-0.314056	0.0088	0.25927	no	43.7213	27.8577	-0.650259	0.00015	0.00324194	yes
SIX1	chr14:61111416-61116155	1.51633	1.3743	-0.141888	0.5663	0.999863	no	1.23296	1.41316	0.1968	0.2523	0.999462	no	1.05519	1.8779	0.831623	0.00225	0.0295983	yes
TMEM229B	chr14:67936982-67982021	6.00805	5.06081	-0.247528	0.1653	0.999863	no	4.92427	5.31468	0.110075	0.3824	0.999462	no	5.55239	3.7327	-0.57289	0.00255	0.0325738	yes
FOS	chr14:75745480-75748937	35.3375	30.5602	-0.20955	0.2017	0.999863	no	31.8256	31.9426	0.0052911	0.96225	0.999462	no	37.6046	18.0572	-1.05833	5e-05	0.00120857	yes
SLIRP	chr14:78174413-78183941	122.105	126.215	0.0477547	0.78715	0.999863	no	130.439	124.61	-0.0659535	0.5978	0.999462	no	119.255	167.903	0.493582	0.0041	0.0470966	yes
GPR65	chr14:88471467-88481155	0.467631	0.60878	0.38055	0.16685	0.999863	no	0.509062	0.522066	0.0363919	0.8444	0.999462	no	0.39909	1.08361	1.44106	5e-05	0.00120857	yes
C14orf159	chr14:91580356-91691703	14.2213	14.3983	0.0178399	0.91385	0.999863	no	14.1851	15.4121	0.119681	0.32015	0.999462	no	15.2482	25.6177	0.748499	5e-05	0.00120857	yes
GPR68	chr14:91698875-91720224	4.03588	3.89161	-0.0525168	0.78885	0.999863	no	3.78467	3.02304	-0.324165	0.02165	0.477651	no	2.49834	1.38958	-0.846319	0.0004	0.00720053	yes
RIN3	chr14:92980124-93155334	13.4216	15.1047	0.170438	0.2958	0.999863	no	14.2429	16.5563	0.217134	0.0664	0.907274	no	13.8608	21.9527	0.663381	0.0001	0.00223912	yes
LGMN	chr14:93170151-93215047	0.552746	0.743615	0.427938	0.1882	0.999863	no	0.611223	0.756568	0.30777	0.1475	0.999462	no	0.588998	2.66381	2.17716	5e-05	0.00120857	yes
ITPK1	chr14:93403258-93582263	19.8109	22.6489	0.193145	0.22715	0.999863	no	20.1036	24.8811	0.307594	0.00735	0.225965	no	18.1483	26.6367	0.553583	0.00095	0.0148707	yes
BTBD7	chr14:93703895-93799385	11.8248	11.0331	-0.0999735	0.58135	0.999863	no	10.8453	10.0981	-0.102985	0.42145	0.999462	no	11.9348	7.84626	-0.605101	0.00095	0.0148707	yes
DDX24	chr14:94517267-94547558	58.1285	63.0754	0.11783	0.44855	0.999863	no	56.3843	63.766	0.177495	0.11215	0.999462	no	54.7108	80.4857	0.556908	0.0004	0.00720053	yes
IFI27L1	chr14:94547638-94569060	26.7391	27.7188	0.0519134	0.78195	0.999863	no	27.5825	30.5406	0.146973	0.2803	0.999462	no	24.6908	43.2131	0.807496	5e-05	0.00120857	yes
IFI27	chr14:94577078-94583033	3.16696	4.78316	0.594865	0.04595	0.999863	no	3.98143	3.80831	-0.0641336	0.74665	0.999462	no	2.35311	6.4553	1.45591	0.0001	0.00223912	yes
IFI27L2	chr14:94594117-94595957	105.345	112.858	0.0993835	0.56065	0.999863	no	116.814	122.312	0.0663559	0.58785	0.999462	no	110.922	169.639	0.612917	0.0003	0.00576447	yes
DNM1P46	chr15:100330360-100347132	3.65087	4.59999	0.33339	0.07635	0.999863	no	3.8442	4.15181	0.111056	0.3996	0.999462	no	4.69627	2.83556	-0.727884	0.0003	0.00576447	yes
WHAMMP2	chr15:28982728-29003508	5.08102	4.43371	-0.196604	0.2653	0.999863	no	5.49462	4.69902	-0.225659	0.0695	0.925078	no	6.11366	3.45319	-0.824109	5e-05	0.00120857	yes
LTK	chr15:41795839-41806085	6.90654	6.96047	0.0112217	0.9493	0.999863	no	7.38274	7.25137	-0.0259029	0.84015	0.999462	no	7.18891	2.75436	-1.38406	5e-05	0.00120857	yes
STARD9	chr15:42867856-43013196	1.08878	1.10824	0.0255546	0.88475	0.999863	no	1.30739	1.24666	-0.0686196	0.59355	0.999462	no	1.55225	1.06823	-0.539144	0.0037	0.0434504	yes
TTBK2	chr15:43036541-43213007	2.83179	2.61145	-0.116867	0.5318	0.999863	no	2.48103	2.49708	0.0093035	0.9441	0.999462	no	3.40782	2.21434	-0.621971	0.00125	0.0184281	yes
TGM5	chr15:43524792-43559055	10.1213	10.0963	-0.00356664	0.982	0.999863	no	9.97316	11.8228	0.245445	0.0512	0.793842	no	16.0175	4.55594	-1.81383	5e-05	0.00120857	yes
CASC4	chr15:44580908-44707959	41.7782	40.9678	-0.0282583	0.85345	0.999863	no	39.1235	36.3095	-0.107689	0.33875	0.999462	no	43.3282	30.6973	-0.497193	0.00145	0.0208377	yes
SECISBP2L	chr15:49280834-49338760	5.89376	5.58565	-0.0774617	0.64615	0.999863	no	5.36115	5.45791	0.0258053	0.8334	0.999462	no	6.46528	4.60472	-0.4896	0.0041	0.0470966	yes
SLC27A2	chr15:50474392-50528589	5.21107	5.52176	0.0835483	0.66525	0.999863	no	4.80852	6.2445	0.376991	0.00555	0.181685	no	5.08462	11.6237	1.19286	5e-05	0.00120857	yes
CYP19A1	chr15:51500253-51630795	0.156573	0.360671	1.20384	1	1	no	0.23538	0.308401	0.389813	1	1	no	0.0985354	0.756423	2.94048	5e-05	0.00120857	yes
GNB5	chr15:52413122-52483565	17.9782	16.2056	-0.149751	0.3531	0.999863	no	18.1859	16.6494	-0.127346	0.2773	0.999462	no	18.3995	12.826	-0.520593	0.0018	0.0247994	yes
RAB27A	chr15:55495163-55582013	31.3413	27.9072	-0.167427	0.28545	0.999863	no	28.9815	25.7878	-0.16844	0.13585	0.999462	no	34.4134	21.0545	-0.708841	5e-05	0.00120857	yes
LOC283663	chr15:57592562-57599967	32.255	30.7783	-0.0676104	0.6658	0.999863	no	39.2794	36.853	-0.0919912	0.4226	0.999462	no	43.6609	26.2029	-0.736616	5e-05	0.00120857	yes
FAM63B	chr15:59063392-59149734	3.1328	3.1192	-0.0062767	0.97395	0.999863	no	2.96711	3.0433	0.0365779	0.78615	0.999462	no	4.69021	2.51025	-0.901822	5e-05	0.00120857	yes
FAM96A	chr15:64364760-64386207	69.5853	72.2447	0.0541106	0.73205	0.999863	no	68.1881	72.7317	0.0930642	0.42965	0.999462	no	72.6982	102.711	0.498595	0.00245	0.031651	yes
PLEKHO2	chr15:65134081-65160201	19.73	25.2445	0.35558	0.02285	0.999863	no	19.6597	23.8504	0.278775	0.01485	0.374347	no	18.1414	25.9402	0.515906	0.00115	0.0173082	yes
SMAD3	chr15:67358194-67487533	14.8594	15.8771	0.0955799	0.5311	0.999863	no	16.0447	14.641	-0.132082	0.25025	0.999462	no	16.247	11.5722	-0.489509	0.00265	0.0334761	yes
CORO2B	chr15:68871307-69020144	0.561792	0.566523	0.0121003	0.967	0.999863	no	0.580118	0.793038	0.451042	0.01845	0.429852	no	0.695856	1.49955	1.10767	0.0001	0.00223912	yes
THAP10	chr15:71173680-71184772	4.16649	3.72055	-0.16332	0.436	0.999863	no	3.30627	3.19924	-0.047475	0.7585	0.999462	no	3.3925	1.90245	-0.834487	0.00085	0.0135534	yes
MYO9A	chr15:72118360-72433311	1.86252	1.87967	0.0132194	0.94315	0.999863	no	1.59148	1.5975	0.00545056	0.9694	0.999462	no	2.11421	1.38929	-0.605774	0.00285	0.0352221	yes
NEO1	chr15:73344824-73597547	1.2266	1.2559	0.0340507	0.86575	0.999863	no	1.17067	1.40443	0.262646	0.06105	0.876174	no	1.17788	1.82294	0.630073	0.002	0.0267992	yes
CD276	chr15:73976621-74006859	41.9524	40.3986	-0.0544492	0.7364	0.999863	no	45.9059	38.0661	-0.270173	0.0201	0.45408	no	34.841	25.0711	-0.474761	0.0039	0.0454093	yes
ARID3B	chr15:74833547-74890472	4.23692	4.23027	-0.00226691	0.98985	0.999863	no	4.59033	4.12122	-0.155524	0.2257	0.999462	no	5.32827	2.88227	-0.886462	5e-05	0.00120857	yes
COX5A	chr15:75212616-75230495	243.904	236.577	-0.0440081	0.77085	0.999863	no	247.578	257.05	0.0541665	0.62625	0.999462	no	217.415	373.096	0.779093	5e-05	0.00120857	yes
CSPG4	chr15:75966662-76005189	4.42016	4.34867	-0.0235252	0.89055	0.999863	no	4.18573	4.72361	0.174411	0.1506	0.999462	no	4.5595	2.48799	-0.873895	5e-05	0.00120857	yes
TSPAN3	chr15:77336359-77363570	16.7628	16.9166	0.0131747	0.93915	0.999863	no	16.1522	17.2017	0.0908152	0.4333	0.999462	no	15.8195	22.2416	0.491557	0.0025	0.0321452	yes
IDH3A	chr15:78441718-78462884	16.1176	15.7344	-0.0347122	0.83295	0.999863	no	15.9224	14.6541	-0.11976	0.31865	0.999462	no	13.6611	27.2127	0.994202	5e-05	0.00120857	yes
FAM108C1	chr15:80987651-81047962	9.32631	7.53937	-0.306864	0.08825	0.999863	no	8.86957	7.34306	-0.272482	0.0355	0.644469	no	8.51062	5.54601	-0.617814	0.00125	0.0184281	yes
NMB	chr15:85198359-85201802	12.1888	11.0541	-0.140969	0.47705	0.999863	no	12.271	11.9173	-0.04219	0.7644	0.999462	no	11.5265	6.74555	-0.772947	0.00045	0.00792336	yes
AEN	chr15:89164526-89175512	6.25455	5.70511	-0.13265	0.4693	0.999863	no	5.99487	5.35274	-0.163451	0.20915	0.999462	no	4.70106	6.90344	0.554328	0.0034	0.0405186	yes
ANPEP	chr15:90328125-90358072	85.6857	82.802	-0.049388	0.7448	0.999863	no	85.3315	87.7887	0.0409559	0.71355	0.999462	no	90.3639	56.8418	-0.668795	5e-05	0.00120857	yes
SOCS1	chr16:11348273-11350039	3.1092	2.90129	-0.0998488	0.69345	0.999863	no	3.47321	3.18573	-0.124642	0.4669	0.999462	no	3.1065	1.68176	-0.885318	0.0031	0.0377996	yes
TXNDC11	chr16:11762288-11836648	19.1763	20.9452	0.127293	0.503	0.999863	no	18.3806	21.436	0.221848	0.1043	0.999462	no	16.6507	24.9465	0.583252	0.00295	0.0362614	yes
NTAN1	chr16:15131709-15149936	35.4575	34.9428	-0.0210958	0.902	0.999863	no	38.2237	37.6632	-0.0213121	0.8572	0.999462	no	39.9008	27.3688	-0.543884	0.0013	0.0190829	yes
UQCRC2	chr16:21964608-21994668	109.007	105.251	-0.0505807	0.7388	0.999863	no	105.224	106.471	0.0169993	0.87935	0.999462	no	109.316	174.586	0.675431	5e-05	0.00120857	yes
NDUFAB1	chr16:23592334-23607639	98.2995	95.9233	-0.0353029	0.8266	0.999863	no	100.79	99.1329	-0.0239162	0.83825	0.999462	no	92.5334	128.679	0.475728	0.0041	0.0470966	yes
IL4R	chr16:27325229-27376099	13.8135	14.8597	0.10533	0.52455	0.999863	no	13.8732	15.8469	0.1919	0.10445	0.999462	no	12.0361	17.3171	0.52483	0.00175	0.0241348	yes
APOBR	chr16:28505969-28510291	67.614	69.6599	0.0430068	0.78535	0.999863	no	74.9616	67.594	-0.149257	0.181	0.999462	no	75.6666	54.2773	-0.479308	0.00275	0.0342336	yes
SH2B1	chr16:28875077-28885534	20.9437	20.847	-0.00667814	0.96615	0.999863	no	23.4721	24.0942	0.0377406	0.74565	0.999462	no	21.7505	30.3054	0.478528	0.00375	0.0438869	yes
LAT	chr16:28996146-29002104	10.718	11.0285	0.0412007	0.8291	0.999863	no	11.6718	10.6727	-0.129103	0.3336	0.999462	no	10.6708	6.87554	-0.634127	0.00165	0.0230814	yes
TGFB1I1	chr16:31483475-31489281	4.09401	3.90027	-0.0699399	0.738	0.999863	no	4.6609	4.703	0.012971	0.9295	0.999462	no	5.07129	3.08703	-0.716133	0.0016	0.0225434	yes
CLUHP3	chr16:31711933-31718745	1.41229	1.38581	-0.0273062	0.91975	0.999863	no	1.28386	1.47913	0.204264	0.28425	0.999462	no	1.93454	0.951906	-1.0231	0.00195	0.0262578	yes
SLC6A10P	chr16:32888796-32896463	1.06394	1.09154	0.0369524	0.87805	0.999863	no	2.40408	1.91806	-0.325841	0.0299	0.576084	no	4.37917	2.6954	-0.700157	0.00125	0.0184281	yes
CORO7	chr16:4390251-4466962	28.8568	29.4618	0.0299379	0.8588	0.999863	no	32.5426	34.6894	0.0921655	0.449	0.999462	no	27.1709	38.4444	0.500711	0.00325	0.0391402	yes
GPT2	chr16:46918307-46965201	7.74358	8.62786	0.156003	0.3564	0.999863	no	8.71426	10.6022	0.282917	0.01755	0.41643	no	8.62174	23.8203	1.46614	5e-05	0.00120857	yes
NOD2	chr16:50731049-50766987	3.00898	3.82204	0.34507	0.0675	0.999863	no	3.67333	4.32341	0.235082	0.0696	0.925078	no	4.21004	7.29441	0.792958	0.0001	0.00223912	yes
IRX3	chr16:54317211-54320378	85.8989	78.5833	-0.128418	0.411	0.999863	no	84.0166	93.6834	0.157119	0.15625	0.999462	no	81.6589	54.4734	-0.584058	0.00015	0.00324194	yes
IRX5	chr16:54965110-54968395	13.3918	13.0286	-0.0396744	0.8201	0.999863	no	13.1564	14.5734	0.147579	0.23635	0.999462	no	13.0154	8.96535	-0.537784	0.0036	0.0424583	yes
CES1	chr16:55836763-55867075	214.482	219.922	0.0361341	0.8122	0.999863	no	205.393	216.106	0.0733501	0.51815	0.999462	no	219.182	341.411	0.639379	5e-05	0.00120857	yes
MT2A	chr16:56642477-56643409	42.9155	45.1196	0.0722564	0.71585	0.999863	no	45.7573	43.8386	-0.0618016	0.66355	0.999462	no	39.1716	25.0861	-0.642916	0.00395	0.0457578	yes
HERPUD1	chr16:56965747-56977793	25.4867	27.2664	0.097379	0.5456	0.999863	no	25.4694	25.8306	0.0203165	0.86235	0.999462	no	21.5901	30.4646	0.496762	0.0033	0.0395335	yes
NLRC5	chr16:57050985-57117436	6.30193	6.735	0.0958841	0.56115	0.999863	no	6.60365	7.28473	0.141611	0.23125	0.999462	no	6.51656	12.5011	0.939875	5e-05	0.00120857	yes
CPNE2	chr16:57126454-57181878	46.9516	47.9901	0.0315632	0.84015	0.999863	no	47.5233	54.3147	0.192709	0.08855	0.999462	no	43.9297	62.6035	0.511046	0.00145	0.0208377	yes
COQ9	chr16:57462086-57495187	20.3086	20.1151	-0.0138121	0.95865	0.999863	no	20.5954	21.4492	0.0586037	0.75485	0.999462	no	19.0354	34.0885	0.840597	0.00095	0.0148707	yes
CCDC102A	chr16:57546089-57570477	2.10136	2.36939	0.173189	0.4391	0.999863	no	2.36384	2.48465	0.0719094	0.6391	0.999462	no	2.28624	1.2057	-0.923106	0.00035	0.00647074	yes
GPR114	chr16:57576600-57611100	9.74826	8.86658	-0.136767	0.42075	0.999863	no	9.36168	9.48105	0.0182793	0.87955	0.999462	no	8.8537	2.96194	-1.57974	5e-05	0.00120857	yes
KIFC3	chr16:57792128-57836439	20.3868	19.1016	-0.0939385	0.55465	0.999863	no	24.3442	19.447	-0.324031	0.00635	0.202256	no	16.7796	10.8449	-0.629687	0.00015	0.00324194	yes
PDP2	chr16:66914382-66925002	2.45239	2.50867	0.0327368	0.8576	0.999863	no	2.57403	2.24688	-0.196102	0.13365	0.999462	no	2.8924	1.84677	-0.647262	0.00065	0.0108052	yes
FAM195A	chr16:691848-698474	28.8848	26.8344	-0.106228	0.55925	0.999863	no	30.8479	32.0049	0.0531213	0.67125	0.999462	no	27.1932	45.8096	0.752403	5e-05	0.00120857	yes
MTSS1L	chr16:70695106-70719954	6.19671	5.36041	-0.20916	0.2248	0.999863	no	6.68507	5.79478	-0.206189	0.091	0.999462	no	6.31603	3.43919	-0.876949	5e-05	0.00120857	yes
HP	chr16:72088507-72094955	0.574683	0.601575	0.0659763	0.87995	0.999863	no	0.545086	0.633336	0.216488	0.44365	0.999462	no	0.60973	5.72415	3.23082	5e-05	0.00120857	yes
NUDT7	chr16:77756388-77776157	69.1445	66.0036	-0.0670695	0.68395	0.999863	no	65.0881	65.0166	-0.00158663	0.9897	0.999462	no	70.7443	47.0912	-0.587158	0.00045	0.00792336	yes
VAT1L	chr16:77822482-78014001	11.9388	11.1648	-0.0966925	0.56075	0.999863	no	10.5873	9.49214	-0.15753	0.1946	0.999462	no	11.6942	5.69891	-1.03703	5e-05	0.00120857	yes
HSDL1	chr16:84155743-84178800	6.3621	6.10661	-0.0591308	0.7329	0.999863	no	5.94347	5.69523	-0.0615525	0.62965	0.999462	no	5.89214	3.92367	-0.586587	0.00205	0.027362	yes
CRISPLD2	chr16:84853586-84943116	0.235346	0.189999	-0.308796	1	1	no	0.208776	0.315788	0.596999	1	1	no	0.216093	0.684837	1.66411	5e-05	0.00120857	yes
KIAA0513	chr16:85061409-85127828	0.459061	0.53328	0.216209	0.37705	0.999863	no	0.447162	0.42246	-0.0819829	0.6373	0.999462	no	0.301682	0.536444	0.8304	0.00255	0.0325738	yes
C16orf74	chr16:85741123-85784689	20.4528	21.3144	0.0595249	0.7506	0.999863	no	20.7318	21.0605	0.0226955	0.86095	0.999462	no	27.3835	18.1186	-0.595834	0.0016	0.0225434	yes
COX4I1	chr16:85833172-85840607	443.801	462.071	0.0582037	0.70845	0.999863	no	463.465	468.06	0.0142332	0.89575	0.999462	no	420.235	633.977	0.593235	5e-05	0.00120857	yes
FENDRR	chr16:86508130-86542466	0.187777	0.19819	0.0778649	1	1	no	0.236965	0.270592	0.191444	1	1	no	0.208573	0.642049	1.62213	0.00105	0.0160683	yes
BANP	chr16:87985037-88110924	7.30644	7.15909	-0.0293935	0.8763	0.999863	no	6.91296	8.67247	0.327139	0.01435	0.364341	no	6.16411	9.19096	0.576322	0.00275	0.0342336	yes
MVD	chr16:88718347-88729495	105.169	105.725	0.00760721	0.96075	0.999863	no	112.598	97.5513	-0.206951	0.0634	0.890188	no	129.877	89.4496	-0.538001	0.0009	0.014251	yes
CDH15	chr16:89238162-89261900	0.110446	0.211822	0.939517	1	1	no	0.125878	0.235203	0.901884	1	1	no	0.214718	0.567018	1.40095	0.0029	0.0357432	yes
TUBB3	chr16:89988416-90002505	0.971384	0.839455	-0.210589	0.4948	0.999863	no	0.950637	0.770583	-0.302944	0.1521	0.999462	no	0.866584	0.274492	-1.65857	0.00255	0.0325738	yes
COX10	chr17:13932608-14111996	2.99692	2.99452	-0.00115565	0.9943	0.999863	no	2.95216	2.85771	-0.0469126	0.77855	0.999462	no	2.67471	4.3313	0.695421	0.00375	0.0438869	yes
SLC43A2	chr17:1477695-1532130	10.8552	12.4394	0.196533	0.24985	0.999863	no	11.1699	13.2972	0.251513	0.03835	0.667913	no	7.81411	12.1687	0.639021	0.0003	0.00576447	yes
PMP22	chr17:15133095-15168644	0.313764	0.408908	0.3821	0.38005	0.999863	no	0.239994	0.379682	0.661793	0.06175	0.880311	no	0.187379	0.913271	2.28508	0.00115	0.0173082	yes
CENPV	chr17:16245847-16256812	14.1295	15.6949	0.151588	0.41795	0.999863	no	14.938	19.84	0.409422	0.0017	0.073297	no	14.0126	23.4182	0.740908	0.0002	0.004127	yes
MPRIP	chr17:16946073-17095962	4.8839	5.22009	0.0960404	0.55	0.999863	no	4.92292	5.60905	0.188241	0.1045	0.999462	no	4.86278	8.87983	0.868751	5e-05	0.00120857	yes
MED9	chr17:17380299-17396534	4.11796	3.87557	-0.0875248	0.66535	0.999863	no	4.25102	4.47836	0.0751626	0.5901	0.999462	no	3.64709	5.75737	0.658665	0.0016	0.0225434	yes
CCDC144B	chr17:18441114-18528930	0.711766	0.688232	-0.0485094	0.82755	0.999863	no	0.679573	0.622986	-0.125428	0.41175	0.999462	no	0.958462	0.547609	-0.807576	0.00065	0.0108052	yes
CLUH	chr17:2592679-2614927	10.2931	9.47046	-0.120168	0.46205	0.999863	no	9.84007	10.1087	0.0388531	0.74225	0.999462	no	8.65256	15.4199	0.833593	5e-05	0.00120857	yes
RAP1GAP2	chr17:2699731-2941035	2.56463	2.76429	0.108156	0.56005	0.999863	no	2.72276	3.37941	0.311704	0.0159	0.393108	no	2.84058	4.3892	0.627773	0.00055	0.00937055	yes
IGFBP4	chr17:38599675-38613982	17.2788	19.8143	0.197539	0.2354	0.999863	no	18.6667	23.172	0.311915	0.0078	0.236205	no	17.6999	33.65	0.926863	5e-05	0.00120857	yes
KRT35	chr17:39632940-39637392	0	0.122863	inf	1	1	no	0.00706154	0.223931	4.98693	1	1	no	0	0.703974	inf	5e-05	0.00120857	yes
JUP	chr17:39910858-39942964	5.45002	5.08307	-0.100561	0.575	0.999863	no	5.07887	5.34572	0.0738769	0.5711	0.999462	no	5.40123	2.8133	-0.941025	5e-05	0.00120857	yes
GHDC	chr17:40341104-40346550	21.6096	22.3208	0.0467132	0.7723	0.999863	no	22.7243	26.9116	0.243989	0.0406	0.695115	no	22.5124	35.0229	0.63758	0.0001	0.00223912	yes
DUSP3	chr17:41843488-41856368	32.4282	28.9233	-0.165018	0.2881	0.999863	no	34.1724	27.8522	-0.295037	0.009	0.262971	no	33.2731	21.8698	-0.605417	0.00025	0.00496408	yes
MPP3	chr17:41878166-41910547	2.78759	2.65919	-0.0680294	0.73685	0.999863	no	3.44978	2.72121	-0.342257	0.01675	0.404921	no	3.60932	1.68347	-1.10029	5e-05	0.00120857	yes
ITGA2B	chr17:42449549-42466873	0.941758	1.07375	0.189225	0.4607	0.999863	no	1.18592	1.36115	0.198821	0.2284	0.999462	no	1.37655	0.731371	-0.912385	0.00145	0.0208377	yes
C17orf104	chr17:42733761-42753165	3.0839	2.96397	-0.0572239	0.76375	0.999863	no	2.88851	2.98907	0.0493702	0.712	0.999462	no	3.21713	2.0395	-0.657557	0.0016	0.0225434	yes
C1QL1	chr17:43037060-43045644	2.28481	1.95578	-0.224335	0.3917	0.999863	no	2.48204	2.79439	0.171007	0.309	0.999462	no	2.53014	1.3511	-0.905082	0.0024	0.0311227	yes
CALCOCO2	chr17:46908349-46942607	36.216	35.2191	-0.0402697	0.7985	0.999863	no	38.4854	34.9582	-0.138679	0.2198	0.999462	no	37.798	25.4459	-0.570877	0.0003	0.00576447	yes
ATP5G1	chr17:46970147-46973232	131.405	132.641	0.0135164	0.93605	0.999863	no	133.962	129.029	-0.0541295	0.6419	0.999462	no	121.567	178.355	0.552995	0.00105	0.0160683	yes
FAM117A	chr17:47787686-47841518	9.89744	9.13026	-0.1164	0.5126	0.999863	no	9.20442	8.06504	-0.190645	0.13635	0.999462	no	10.3792	6.88354	-0.59247	0.00125	0.0184281	yes
COL1A1	chr17:48261456-48279000	1.08668	1.05155	-0.0474106	0.8357	0.999863	no	1.05984	1.28137	0.273842	0.06545	0.902637	no	1.51673	0.638992	-1.2471	5e-05	0.00120857	yes
ACSF2	chr17:48503518-48552200	8.20549	8.68203	0.0814421	0.65615	0.999863	no	9.36884	11.5753	0.305105	0.01975	0.450491	no	9.76229	19.893	1.02697	5e-05	0.00120857	yes
RSAD1	chr17:48556189-48563336	12.5206	12.5722	0.00594189	0.97415	0.999863	no	12.7237	13.1934	0.0523021	0.67345	0.999462	no	12.1146	17.5725	0.536569	0.00235	0.0306778	yes
PCTP	chr17:53828339-53854748	19.4943	20.7489	0.0899844	0.5881	0.999863	no	18.3349	21.4392	0.225658	0.05855	0.854504	no	18.2971	26.7726	0.549147	0.00135	0.0197112	yes
TRIM25	chr17:54965269-54991409	43.514	42.4226	-0.036648	0.80875	0.999863	no	42.5953	36.5231	-0.221885	0.04545	0.739648	no	38.162	25.8621	-0.561294	0.0003	0.00576447	yes
SCPEP1	chr17:55055467-55084129	34.3544	36.1284	0.0726365	0.649	0.999863	no	31.9277	37.6239	0.236841	0.0406	0.695115	no	34.0548	115.886	1.76678	5e-05	0.00120857	yes
LPO	chr17:56315786-56345879	0.569777	0.626917	0.137875	0.6406	0.999863	no	0.691443	0.850766	0.299151	0.11625	0.999462	no	0.730996	2.57366	1.81589	5e-05	0.00120857	yes
MRC2	chr17:60704761-60770962	61.0684	64.8526	0.0867393	0.5722	0.999863	no	63.9412	75.1505	0.233038	0.0357	0.64644	no	62.395	99.7717	0.677201	5e-05	0.00120857	yes
ACE	chr17:61554421-61575741	1.80804	1.64879	-0.133016	0.52635	0.999863	no	1.99228	1.77523	-0.166414	0.26825	0.999462	no	1.6869	0.980088	-0.783389	0.0013	0.0190829	yes
ARSG	chr17:66255322-66417000	0.454639	0.392982	-0.210259	0.64965	0.999863	no	0.487388	0.581365	0.254372	0.40355	0.999462	no	0.392467	1.54548	1.97742	0.00045	0.00792336	yes
CDC42EP4	chr17:71279762-71308143	6.6116	6.10936	-0.113977	0.5287	0.999863	no	6.068	6.63308	0.128459	0.31835	0.999462	no	5.72072	3.63838	-0.652899	0.00085	0.0135534	yes
ACAP1	chr17:7239847-7254793	2.52287	2.32784	-0.116078	0.59315	0.999863	no	2.87636	2.87383	-0.00126941	0.9924	0.999462	no	3.38438	2.13462	-0.664914	0.00405	0.0467578	yes
GPRC5C	chr17:72427666-72443568	4.85874	5.52924	0.186497	0.3524	0.999863	no	7.15682	6.26803	-0.191307	0.1612	0.999462	no	8.52356	4.83322	-0.81847	5e-05	0.00120857	yes
CD300A	chr17:72462521-72480937	25.6835	24.8084	-0.0500139	0.76615	0.999863	no	32.0923	27.2179	-0.237672	0.04725	0.759329	no	51.7491	26.5462	-0.963031	5e-05	0.00120857	yes
CD300LB	chr17:72517312-72527613	3.02137	3.28255	0.119613	0.5728	0.999863	no	2.98105	3.72672	0.322084	0.02725	0.545849	no	2.25618	4.78868	1.08574	0.0001	0.00223912	yes
CD300LF	chr17:72667255-72743474	19.9188	24.4042	0.293002	0.15815	0.999863	no	21.0518	28.0995	0.416601	0.01315	0.344384	no	20.5074	34.9172	0.767795	0.00115	0.0173082	yes
CDR2L	chr17:72983726-73001892	1.15063	1.09431	-0.0723975	0.7626	0.999863	no	1.17671	1.1364	-0.050289	0.7655	0.999462	no	0.902867	2.60342	1.52782	5e-05	0.00120857	yes
ATP5H	chr17:73034954-73043074	273.516	285.118	0.0599322	0.70505	0.999863	no	277.997	262.505	-0.0827252	0.4704	0.999462	no	268.084	367.825	0.456333	0.00365	0.0429369	yes
LOC100131096	chr17:76000317-76107880	4.09325	5.21696	0.349962	0.2365	0.999863	no	4.35724	5.7206	0.392752	0.06975	0.925333	no	3.95586	8.21704	1.05463	0.0005	0.0086261	yes
TMC6	chr17:76108998-76139049	31.5819	35.6955	0.176644	0.39945	0.999863	no	35.0856	44.1372	0.331113	0.0254	0.522103	no	31.2938	60.0637	0.940617	5e-05	0.00120857	yes
ENGASE	chr17:77071018-77084685	9.88589	10.7618	0.122482	0.4474	0.999863	no	11.6364	11.5363	-0.0124575	0.91595	0.999462	no	10.5182	14.8378	0.496385	0.0027	0.0338887	yes
LINC00482	chr17:79276623-79283048	14.3045	17.6465	0.302911	0.06495	0.999863	no	17.2888	21.9081	0.341626	0.0033	0.125117	no	17.1196	26.892	0.651528	0.0002	0.004127	yes
MRPL12	chr17:79670399-79674556	68.9431	65.8653	-0.0658881	0.68205	0.999863	no	72.0238	72.8784	0.0170163	0.88145	0.999462	no	63.9542	96.8405	0.598571	0.0002	0.004127	yes
PPP1R27	chr17:79791367-79792926	213.797	241.587	0.176297	0.2593	0.999863	no	238.285	293.744	0.301869	0.00675	0.213077	no	215.818	399.734	0.889226	5e-05	0.00120857	yes
APCDD1	chr18:10454624-10488698	0.819321	1.25587	0.616181	0.0276	0.999863	no	0.897192	1.23598	0.462167	0.0127	0.335707	no	0.766089	3.00485	1.97171	5e-05	0.00120857	yes
AFG3L2	chr18:12328942-12377275	38.7453	37.7589	-0.0372058	0.80895	0.999863	no	39.0607	38.4295	-0.0235016	0.8319	0.999462	no	35.936	52.682	0.551878	0.0006	0.0100596	yes
ATP5A1	chr18:43664109-43684199	274.918	270.525	-0.0232365	0.8778	0.999863	no	271.651	272.31	0.00349755	0.9736	0.999462	no	262.98	377.198	0.520367	0.00105	0.0160683	yes
KATNAL2	chr18:44526786-44628614	1.80291	1.59961	-0.172607	0.46355	0.999863	no	1.69859	1.8126	0.0937244	0.55245	0.999462	no	1.58314	2.62208	0.727918	0.00195	0.0262578	yes
NARS	chr18:55267893-55289177	56.2279	54.427	-0.0469627	0.7612	0.999863	no	52.4762	51.7985	-0.0187535	0.86315	0.999462	no	52.2719	80.0856	0.615506	5e-05	0.00120857	yes
TNFRSF11A	chr18:59992519-60054943	0.661335	0.597239	-0.147073	0.57075	0.999863	no	0.761296	0.604135	-0.333587	0.0706	0.933108	no	0.77772	0.405014	-0.94128	0.00195	0.0262578	yes
BCL2	chr18:60790578-60986613	27.0806	24.957	-0.117818	0.4627	0.999863	no	25.5581	23.6938	-0.10927	0.3824	0.999462	no	26.9871	19.6476	-0.457916	0.00395	0.0457578	yes
HMSD	chr18:61616587-61627645	1.17262	1.23889	0.0793211	0.86105	0.999863	no	1.19178	1.65248	0.471515	0.1099	0.999462	no	1.27129	4.52821	1.83265	0.00075	0.0122152	yes
SERPINB8	chr18:61637262-61656608	40.4398	38.6796	-0.064201	0.69445	0.999863	no	33.7548	40.2661	0.254474	0.0329	0.6122	no	40.6563	67.0568	0.721905	5e-05	0.00120857	yes
YES1	chr18:721591-812327	7.96927	7.7316	-0.0436815	0.79655	0.999863	no	7.10903	6.55714	-0.116586	0.3439	0.999462	no	7.56832	5.18106	-0.546726	0.00195	0.0262578	yes
MBP	chr18:74690788-74844774	25.6339	24.5958	-0.0596434	0.70185	0.999863	no	25.8069	23.7063	-0.122486	0.2752	0.999462	no	27.6728	18.9525	-0.546077	0.00025	0.00496408	yes
CNN2	chr19:1026297-1039064	121.052	115.557	-0.067022	0.662	0.999863	no	129.505	122.999	-0.0743591	0.5091	0.999462	no	127.297	84.5993	-0.589482	0.00025	0.00496408	yes
MRPL4	chr19:10362639-10370736	34.3473	32.3177	-0.0878712	0.6029	0.999863	no	34.0715	33.2152	-0.0367236	0.7698	0.999462	no	28.1306	49.8264	0.824767	5e-05	0.00120857	yes
ICAM1	chr19:10381516-10397291	2.21545	3.10067	0.484982	0.0184	0.999863	no	2.26332	2.19376	-0.0450336	0.7478	0.999462	no	2.17777	4.27327	0.972488	5e-05	0.00120857	yes
ABCA7	chr19:1040101-1065570	11.8055	12.259	0.0543831	0.7332	0.999863	no	13.8045	14.978	0.117709	0.30625	0.999462	no	14.9751	8.98647	-0.736739	5e-05	0.00120857	yes
S1PR5	chr19:10623417-10628668	4.0144	3.77561	-0.0884763	0.66215	0.999863	no	4.04149	4.15684	0.0405988	0.77625	0.999462	no	4.51871	2.8647	-0.657525	0.00225	0.0295983	yes
RAB3D	chr19:11406823-11450344	12.86	15.209	0.242029	0.13395	0.999863	no	13.0885	15.8422	0.275478	0.0184	0.429394	no	11.8798	17.8575	0.588028	0.0003	0.00576447	yes
ECSIT	chr19:11594241-11639987	11.8091	11.065	-0.0938917	0.6593	0.999863	no	12.0654	13.1892	0.128483	0.39815	0.999462	no	11.3975	21.4083	0.909457	5e-05	0.00120857	yes
ZNF44	chr19:12382624-12405714	6.47952	7.76111	0.260377	0.1474	0.999863	no	7.07046	8.93236	0.337239	0.0077	0.233677	no	6.81241	13.6666	1.00442	5e-05	0.00120857	yes
ATP5D	chr19:1241748-1244824	109.49	103.081	-0.0870236	0.601	0.999863	no	118.768	133.768	0.171594	0.15505	0.999462	no	98.7489	167.646	0.763584	5e-05	0.00120857	yes
DNASE2	chr19:12986024-12992335	4.39476	4.71782	0.102334	0.60635	0.999863	no	4.35096	5.53506	0.347265	0.01335	0.347075	no	3.189	9.82434	1.62326	5e-05	0.00120857	yes
IER2	chr19:13261281-13265718	45.1765	41.9748	-0.106047	0.50045	0.999863	no	48.4739	43.7949	-0.146446	0.1997	0.999462	no	44.3416	28.8583	-0.619671	0.0002	0.004127	yes
CACNA1A	chr19:13317255-13617274	0.889344	0.849134	-0.0667491	0.74805	0.999863	no	0.93653	0.857869	-0.126567	0.37795	0.999462	no	0.913386	0.440184	-1.05312	5e-05	0.00120857	yes
NDUFS7	chr19:1383882-1395588	72.6085	66.0852	-0.135812	0.40955	0.999863	no	74.3175	77.1529	0.0540183	0.65055	0.999462	no	61.7345	118.798	0.94436	5e-05	0.00120857	yes
IL27RA	chr19:14142551-14163717	5.40317	5.05077	-0.097303	0.60455	0.999863	no	5.49475	5.74443	0.0641107	0.63115	0.999462	no	4.5118	7.00165	0.633992	0.00115	0.0173082	yes
LPHN1	chr19:14247963-14316997	6.42282	7.17025	0.158818	0.35515	0.999863	no	7.24602	8.14252	0.168287	0.18095	0.999462	no	7.1616	11.0287	0.622904	0.0004	0.00720053	yes
NDUFB7	chr19:14676889-14682889	91.5132	88.8944	-0.0418868	0.8093	0.999863	no	92.8829	100.059	0.107365	0.386	0.999462	no	85.7634	121.603	0.503741	0.00335	0.0399925	yes
EMR2	chr19:14843508-14889353	2.64404	3.09043	0.225064	0.21515	0.999863	no	2.70955	2.67654	-0.0176883	0.89375	0.999462	no	2.1568	3.67958	0.770651	0.00015	0.00324194	yes
UQCR11	chr19:1597153-1605483	56.0872	53.3643	-0.0717972	0.65655	0.999863	no	57.1443	57.7119	0.0142596	0.90405	0.999462	no	51.1937	72.2082	0.496198	0.00215	0.0284195	yes
HSH2D	chr19:16244837-16269377	33.9922	33.9095	-0.0035165	0.9822	0.999863	no	40.6862	33.9432	-0.261419	0.02235	0.484776	no	39.3356	24.8705	-0.661397	5e-05	0.00120857	yes
ANKLE1	chr19:17392453-17398454	4.06334	4.51192	0.151075	0.423	0.999863	no	4.1062	5.10225	0.31333	0.01815	0.42426	no	4.08084	6.36918	0.64224	0.0006	0.0100596	yes
ABHD8	chr19:17402939-17414282	13.5266	14.01	0.0506539	0.7673	0.999863	no	13.5573	17.0388	0.329747	0.00825	0.246142	no	11.8882	20.3366	0.774554	5e-05	0.00120857	yes
MRPL34	chr19:17416476-17417652	30.734	29.7281	-0.0480049	0.7822	0.999863	no	32.3023	34.2732	0.0854461	0.4937	0.999462	no	28.9212	44.2148	0.6124	0.0007	0.0114966	yes
MOB3A	chr19:2071034-2096269	60.1699	56.3016	-0.0958666	0.5352	0.999863	no	66.344	61.5632	-0.107897	0.33495	0.999462	no	65.0389	46.0621	-0.497724	0.00215	0.0284195	yes
C19orf35	chr19:2274630-2282181	3.40372	3.09839	-0.135592	0.5061	0.999863	no	3.61531	3.29309	-0.134679	0.34345	0.999462	no	3.3186	2.00633	-0.726018	0.00135	0.0197112	yes
GADD45B	chr19:2476122-2478257	21.7174	32.794	0.594579	0.0007	0.182804	no	25.5656	33.2686	0.37996	0.0014	0.0626544	no	20.6022	42.575	1.04721	5e-05	0.00120857	yes
GNG7	chr19:2511217-2702746	3.65485	3.35188	-0.12484	0.5049	0.999863	no	3.96395	4.12632	0.0579156	0.65555	0.999462	no	4.57504	3.06252	-0.579064	0.00235	0.0306778	yes
UQCRFS1	chr19:29698166-29704136	80.1137	76.942	-0.0582775	0.71335	0.999863	no	80.688	81.8394	0.0204407	0.8564	0.999462	no	72.1807	112.114	0.635287	0.0001	0.00223912	yes
TLE6	chr19:2977535-2995182	0.657911	0.596082	-0.142381	0.675	0.999863	no	0.630114	0.84132	0.417042	0.0479	0.763636	no	0.668713	2.53702	1.92368	5e-05	0.00120857	yes
GNA15	chr19:3136190-3163766	37.562	34.8806	-0.106851	0.5026	0.999863	no	41.6068	36.847	-0.175269	0.1234	0.999462	no	43.8627	26.5667	-0.723375	5e-05	0.00120857	yes
FFAR2	chr19:35940616-35942669	0.191244	0.363177	0.925263	1	1	no	0.184059	0.252796	0.457807	1	1	no	0.171318	0.730554	2.09232	0.00205	0.027362	yes
COX6B1	chr19:36139124-36149686	294.293	305.558	0.0541939	0.7292	0.999863	no	314.038	302.195	-0.0554596	0.61805	0.999462	no	287.892	404.733	0.49144	0.00265	0.0334761	yes
ARHGAP33	chr19:36266416-36279724	20.76	21.0184	0.0178453	0.9121	0.999863	no	24.3546	25.7274	0.0791134	0.4851	0.999462	no	26.412	18.8962	-0.483093	0.0028	0.0347612	yes
APLP1	chr19:36359400-36370699	4.90117	4.85619	-0.0133016	0.94505	0.999863	no	5.17009	4.99324	-0.0502149	0.71105	0.999462	no	5.08004	3.31034	-0.617858	0.0025	0.0321452	yes
EIF3K	chr19:39109721-39127595	242.749	247.822	0.0298387	0.8465	0.999863	no	255.656	251.374	-0.0243639	0.83005	0.999462	no	235.235	391.042	0.733225	5e-05	0.00120857	yes
AXL	chr19:41725107-41767671	6.58398	6.69844	0.0248663	0.88675	0.999863	no	6.66809	5.22868	-0.350825	0.00425	0.150635	no	5.21468	2.50716	-1.05652	5e-05	0.00120857	yes
CEACAM6	chr19:42259397-42276113	6.53458	5.97022	-0.130312	0.48225	0.999863	no	5.50692	6.30609	0.195501	0.1447	0.999462	no	7.45996	2.83987	-1.39334	5e-05	0.00120857	yes
POU2F2	chr19:42590261-42636625	5.11901	5.09123	-0.00785161	0.9652	0.999863	no	5.57733	4.15881	-0.423406	0.0015	0.0658789	no	5.08351	2.28655	-1.15265	5e-05	0.00120857	yes
KCNN4	chr19:44270684-44285409	34.4937	32.9139	-0.0676326	0.6667	0.999863	no	36.74	32.262	-0.187513	0.10405	0.999462	no	33.0247	23.055	-0.518464	0.00145	0.0208377	yes
BCL3	chr19:45251977-45263301	11.0504	13.2573	0.262692	0.14375	0.999863	no	11.496	13.3378	0.214391	0.09145	0.999462	no	8.26762	13.7656	0.735522	0.00015	0.00324194	yes
TOMM40	chr19:45394476-45406946	44.6425	43.5305	-0.0363929	0.82085	0.999863	no	43.7718	44.7073	0.0305082	0.7941	0.999462	no	38.2758	60.05	0.649731	0.0002	0.004127	yes
HIF3A	chr19:46720994-46846690	0.103472	0.189014	0.869261	1	1	no	0.183736	0.1609	-0.191465	1	1	no	0.13033	0.752243	2.52903	5e-05	0.00120857	yes
EMP3	chr19:48828628-48833810	233.228	227.862	-0.0335793	0.83175	0.999863	no	264.372	204.161	-0.372862	0.0011	0.0523778	no	201.716	125.783	-0.681387	5e-05	0.00120857	yes
FTL	chr19:49468565-49470136	6201.45	6474.1	0.0620733	0.72905	0.999863	no	6777.71	6443.67	-0.0729135	0.5827	0.999462	no	5902.99	8612.3	0.544953	0.00315	0.0381711	yes
SLC17A7	chr19:49932654-49944808	1.01556	1.11417	0.133686	0.6047	0.999863	no	1.17287	1.23497	0.074436	0.66155	0.999462	no	0.877226	2.194	1.32254	5e-05	0.00120857	yes
MYH14	chr19:50706884-50813801	3.36747	3.20664	-0.070601	0.6936	0.999863	no	3.30951	3.51417	0.086564	0.48905	0.999462	no	2.98517	4.93513	0.725276	5e-05	0.00120857	yes
NAPSB	chr19:50837056-50848005	13.5014	15.8934	0.23532	0.1984	0.999863	no	13.437	17.1563	0.352534	0.00715	0.222721	no	10.1847	41.5146	2.02722	5e-05	0.00120857	yes
SYT3	chr19:51125233-51143092	1.60947	1.84443	0.196594	0.40685	0.999863	no	1.57068	2.15508	0.456347	0.0048	0.165565	no	1.24887	6.20439	2.31267	5e-05	0.00120857	yes
SHANK1	chr19:51165083-51220195	10.5421	10.0885	-0.0634528	0.69135	0.999863	no	10.0522	10.3042	0.0357201	0.7542	0.999462	no	10.6476	4.23207	-1.3311	5e-05	0.00120857	yes
SIGLEC6	chr19:52022783-52035110	2.58606	3.09031	0.256998	0.2535	0.999863	no	2.57897	3.01761	0.226612	0.15135	0.999462	no	2.21712	4.75964	1.10216	5e-05	0.00120857	yes
NLRP12	chr19:54296854-54327648	1.72831	2.00673	0.215488	0.34105	0.999863	no	2.00953	2.03102	0.0153483	0.9205	0.999462	no	1.59226	3.79619	1.25348	5e-05	0.00120857	yes
MYADM	chr19:54369610-54379689	82.7535	76.1673	-0.119649	0.44085	0.999863	no	85.8733	74.9361	-0.196548	0.0826	0.999462	no	85.9071	59.9152	-0.519855	0.0011	0.0167398	yes
NDUFA3	chr19:54606159-54610281	237.155	237.29	0.000817295	0.9951	0.999863	no	247.072	238.988	-0.0479929	0.6905	0.999462	no	218.701	354.234	0.695742	5e-05	0.00120857	yes
LILRA1	chr19:55105040-55113687	0.834214	0.909867	0.125239	0.64605	0.999863	no	0.81307	0.953842	0.230371	0.2063	0.999462	no	0.898033	1.88552	1.07012	0.00015	0.00324194	yes
LILRB1	chr19:55128628-55149004	1.48727	1.48915	0.00181714	0.99415	0.999863	no	1.33655	1.44276	0.110321	0.5048	0.999462	no	1.27807	2.19038	0.777213	0.0021	0.0278662	yes
LILRB4	chr19:55174123-55179846	56.4106	64.9492	0.203345	0.1915	0.999863	no	58.3164	67.4821	0.210602	0.06305	0.887921	no	50.6608	155.039	1.61369	5e-05	0.00120857	yes
RDH13	chr19:55555691-55580914	5.4416	5.9797	0.136044	0.4868	0.999863	no	5.99868	6.36605	0.0857545	0.5351	0.999462	no	5.50478	9.00768	0.710473	0.00025	0.00496408	yes
TNNT1	chr19:55644160-55660606	108.582	116.516	0.101743	0.51945	0.999863	no	120.496	121.635	0.0135699	0.9068	0.999462	no	118.712	84.6651	-0.487631	0.0024	0.0311227	yes
COX6B2	chr19:55861069-55866182	0.656804	0.66594	0.0199292	0.9682	0.999863	no	0.808205	0.938715	0.215965	0.32235	0.999462	no	1.15331	0.402321	-1.51936	0.00165	0.0230814	yes
ISOC2	chr19:55964345-55973049	41.0037	37.5117	-0.128414	0.4561	0.999863	no	40.2186	41.7925	0.0553832	0.6506	0.999462	no	35.176	55.4015	0.655332	0.0001	0.00223912	yes
ZFP28	chr19:57050316-57068170	3.56905	3.35937	-0.0873471	0.6431	0.999863	no	3.57095	2.93505	-0.282925	0.0353	0.642487	no	4.57416	2.6165	-0.80587	0.00015	0.00324194	yes
SLC25A23	chr19:6440074-6459781	24.9749	24.2783	-0.040811	0.7937	0.999863	no	24.8077	26.5959	0.100416	0.3704	0.999462	no	26.9181	43.5571	0.694331	5e-05	0.00120857	yes
TUBB4A	chr19:6494329-6502330	0.56142	0.922039	0.715746	0.02485	0.999863	no	0.631914	0.865006	0.452983	0.02785	0.553167	no	0.602918	3.02623	2.32749	5e-05	0.00120857	yes
EMR1	chr19:6887559-6940464	1.39674	1.23448	-0.178164	0.47615	0.999863	no	1.18811	0.997148	-0.252789	0.15505	0.999462	no	1.16489	0.611986	-0.928629	0.0038	0.0443582	yes
FCER2	chr19:7753642-7767032	6.50145	5.85924	-0.150048	0.4646	0.999863	no	7.24983	5.69117	-0.349222	0.0155	0.387162	no	4.79785	1.05365	-2.18699	5e-05	0.00120857	yes
TIMM44	chr19:7991602-8008708	14.042	14.9809	0.0933742	0.586	0.999863	no	14.6689	15.411	0.071206	0.56455	0.999462	no	12.8607	21.3812	0.73337	5e-05	0.00120857	yes
PRAM1	chr19:8554939-8567538	8.70509	8.88185	0.0290004	0.87335	0.999863	no	9.24537	10.7508	0.217645	0.09055	0.999462	no	9.87018	16.8835	0.774462	5e-05	0.00120857	yes
RFX8	chr2:102013822-102091165	16.2485	16.7926	0.0475272	0.78765	0.999863	no	18.6757	16.8389	-0.149368	0.22385	0.999462	no	19.8512	12.4646	-0.67139	0.00035	0.00647074	yes
MRPS9	chr2:105654482-105716418	13.3551	13.6374	0.0301785	0.86465	0.999863	no	13.2099	13.5629	0.0380425	0.7703	0.999462	no	11.5537	17.2418	0.577558	0.0017	0.023564	yes
SULT1C2	chr2:108905094-108926371	0.309557	0.308565	-0.00462842	1	1	no	0.250565	0.406772	0.699037	0.009	0.262971	no	0.281245	3.58186	3.67081	5e-05	0.00120857	yes
LPIN1	chr2:11817704-11967533	8.14518	8.39978	0.044405	0.8089	0.999863	no	8.35971	7.98053	-0.0669697	0.5916	0.999462	no	13.1279	8.98649	-0.546809	0.0019	0.0259162	yes
STEAP3	chr2:119981383-120023227	5.27878	5.54621	0.0712984	0.6924	0.999863	no	5.36202	6.53599	0.285628	0.02575	0.526238	no	5.45803	14.3964	1.39926	5e-05	0.00120857	yes
BIN1	chr2:127805598-127864903	6.75727	5.5863	-0.274547	0.14735	0.999863	no	6.54256	5.6516	-0.211195	0.11805	0.999462	no	6.57235	2.67534	-1.29669	5e-05	0.00120857	yes
MYO7B	chr2:128293377-128395303	0.528591	0.614943	0.218299	0.3677	0.999863	no	0.723952	0.795685	0.136304	0.3781	0.999462	no	0.767989	0.464605	-0.725081	0.0044	0.049997	yes
TRIB2	chr2:12856997-12882858	1.08678	1.13801	0.0664427	0.79625	0.999863	no	1.23333	1.38769	0.170132	0.3508	0.999462	no	1.15145	2.15544	0.904527	0.0003	0.00576447	yes
KYNU	chr2:143635194-143799885	40.7834	39.2232	-0.0562743	0.72715	0.999863	no	40.4306	33.0884	-0.289124	0.01425	0.363105	no	40.2765	23.9002	-0.752915	5e-05	0.00120857	yes
RND3	chr2:151324706-151344209	0.605032	1.13646	0.90946	0.00185	0.389384	no	0.824809	0.721518	-0.193024	0.3149	0.999462	no	0.480854	1.70267	1.82413	5e-05	0.00120857	yes
FMNL2	chr2:153191750-153506348	0.637284	0.649997	0.0284966	0.9141	0.999863	no	0.650637	0.486157	-0.42043	0.01955	0.44665	no	0.480112	1.00587	1.067	0.00025	0.00496408	yes
ACVR1C	chr2:158383278-158485399	0.438978	0.439744	0.00251498	0.99145	0.999863	no	0.436647	0.403598	-0.11355	0.49955	0.999462	no	0.588526	0.319743	-0.880193	0.0009	0.014251	yes
WDSUB1	chr2:160092303-160143236	9.80676	11.2575	0.199037	0.27265	0.999863	no	9.25097	11.5988	0.326303	0.0114	0.311835	no	10.418	15.2257	0.547433	0.0027	0.0338887	yes
DHRS9	chr2:169921298-169952677	139.939	124.721	-0.166093	0.2869	0.999863	no	143.923	116.139	-0.309438	0.007	0.219499	no	141.04	94.0329	-0.584869	0.00025	0.00496408	yes
FASTKD1	chr2:170386262-170430424	14.6627	14.4306	-0.0230264	0.8855	0.999863	no	14.7687	15.8932	0.105858	0.37195	0.999462	no	16.4178	28.2926	0.785166	0.0001	0.00223912	yes
CYBRD1	chr2:172378756-172414643	7.83791	7.51989	-0.0597559	0.72185	0.999863	no	7.59155	8.13501	0.0997502	0.41175	0.999462	no	9.57907	6.59459	-0.538602	0.0024	0.0311227	yes
SLC25A12	chr2:172639914-172750816	4.18849	3.98459	-0.071999	0.6974	0.999863	no	4.18345	4.20069	0.00593565	0.9617	0.999462	no	3.68569	7.33549	0.992959	5e-05	0.00120857	yes
DLX1	chr2:172950207-172954401	7.39145	6.11848	-0.272684	0.1446	0.999863	no	7.52837	5.9448	-0.34071	0.01095	0.303043	no	7.93064	5.33164	-0.572858	0.00255	0.0325738	yes
ATP5G3	chr2:176040985-176046490	82.0722	80.9513	-0.01984	0.89745	0.999863	no	79.2223	80.7082	0.0268103	0.8142	0.999462	no	77.6972	123.562	0.669301	5e-05	0.00120857	yes
TTC30A	chr2:178479025-178483694	0.633565	0.707672	0.159588	0.5295	0.999863	no	0.64219	0.704929	0.134479	0.4442	0.999462	no	0.945555	0.480886	-0.975465	0.00115	0.0173082	yes
ITGA4	chr2:182321618-182521834	19.6689	18.1204	-0.118298	0.50295	0.999863	no	16.6683	16.0744	-0.052342	0.7069	0.999462	no	20.6635	13.5842	-0.605153	0.0011	0.0167398	yes
STAT1	chr2:191833761-191878976	55.0517	52.1829	-0.0772083	0.6264	0.999863	no	51.6044	40.8063	-0.338704	0.0031	0.118487	no	38.755	28.0669	-0.465513	0.0036	0.0424583	yes
MYO1B	chr2:192110106-192290115	0.842427	0.894313	0.0862279	0.71095	0.999863	no	0.77836	0.767103	-0.0210182	0.89695	0.999462	no	1.13371	0.63902	-0.827124	0.00075	0.0122152	yes
MARS2	chr2:198570027-198573114	4.97058	4.6	-0.111779	0.54765	0.999863	no	4.29821	4.48573	0.0616058	0.6432	0.999462	no	3.88862	7.16526	0.88176	5e-05	0.00120857	yes
FZD7	chr2:202899309-202903160	3.27928	3.19576	-0.0372204	0.84965	0.999863	no	3.45601	2.97869	-0.214428	0.11555	0.999462	no	3.57757	2.16895	-0.721982	0.0007	0.0114966	yes
NBEAL1	chr2:203879601-204082717	0.385654	0.340871	-0.178082	0.48535	0.999863	no	0.36571	0.358744	-0.027748	0.8736	0.999462	no	0.58209	0.334535	-0.799084	0.003	0.0367769	yes
FN1	chr2:216225178-216300791	0.400595	0.516402	0.366348	0.1381	0.999863	no	0.385666	0.342782	-0.17006	0.3441	0.999462	no	0.32669	1.67731	2.36015	5e-05	0.00120857	yes
CXCR2	chr2:218990012-219001976	10.8978	12.4358	0.19046	0.2661	0.999863	no	10.2163	13.3239	0.383144	0.0021	0.0870915	no	10.4807	15.0631	0.523286	0.0028	0.0347612	yes
ATG9A	chr2:220084101-220094361	18.9232	21.1935	0.163465	0.3058	0.999863	no	19.651	23.4997	0.25804	0.02645	0.534366	no	18.4417	30.6435	0.732611	5e-05	0.00120857	yes
DOCK10	chr2:225629806-225907330	10.1723	9.34796	-0.121915	0.4445	0.999863	no	8.98139	8.62243	-0.0588441	0.61695	0.999462	no	10.6003	7.5868	-0.482543	0.00315	0.0381711	yes
B3GNT7	chr2:232260334-232265875	22.0815	20.6053	-0.0998271	0.52415	0.999863	no	20.0062	20.5147	0.0362104	0.7544	0.999462	no	22.9468	14.7149	-0.641013	5e-05	0.00120857	yes
NGEF	chr2:233743395-233877951	2.31191	2.4624	0.0909779	0.67545	0.999863	no	2.84377	2.38704	-0.252583	0.09515	0.999462	no	1.98462	1.15845	-0.776659	0.0027	0.0338887	yes
MLPH	chr2:238395877-238463961	0.493327	0.410961	-0.263542	0.38085	0.999863	no	0.484677	0.439882	-0.139907	0.4884	0.999462	no	0.65079	0.323177	-1.00987	0.0041	0.0470966	yes
KLHL30	chr2:239047362-239061547	2.11565	2.1257	0.00683952	0.97285	0.999863	no	2.27438	1.94119	-0.228534	0.11575	0.999462	no	2.33447	1.49235	-0.645513	0.00395	0.0457578	yes
NDUFA10	chr2:240896788-240964819	12.3202	12.3507	0.00356683	0.9825	0.999863	no	12.8179	13.2735	0.0503895	0.6647	0.999462	no	12.5498	19.4173	0.629674	5e-05	0.00120857	yes
GPR35	chr2:241544824-241570676	8.81418	9.36226	0.087031	0.6422	0.999863	no	9.2081	9.39981	0.0297277	0.8249	0.999462	no	7.79382	12.0341	0.626729	0.00105	0.0160683	yes
OTOF	chr2:26680070-26781566	0.205826	0.256237	0.316059	1	1	no	0.187843	0.295397	0.653132	1	1	no	0.173261	8.64926	5.64156	5e-05	0.00120857	yes
MRPL33	chr2:27994583-28002608	160.524	154.692	-0.0533879	0.75765	0.999863	no	153.409	140.52	-0.126604	0.3143	0.999462	no	183.343	126.633	-0.533891	0.002	0.0267992	yes
FOSL2	chr2:28615778-28637516	31.2519	29.1172	-0.102076	0.51645	0.999863	no	32.2287	31.1159	-0.0506946	0.6514	0.999462	no	39.7613	27.4295	-0.535634	0.00075	0.0122152	yes
FAM179A	chr2:29204163-29275096	0.123677	0.192015	0.634638	1	1	no	0.132027	0.312458	1.24283	1	1	no	0.117113	1.28737	3.45845	5e-05	0.00120857	yes
CLIP4	chr2:29338307-29406679	0.677314	0.530585	-0.352239	0.1918	0.999863	no	0.588002	0.508687	-0.209044	0.26365	0.999462	no	0.518873	1.06914	1.043	0.00035	0.00647074	yes
QPCT	chr2:37571752-37600465	2.08962	2.25491	0.109833	0.661	0.999863	no	1.93944	2.22105	0.195597	0.26395	0.999462	no	2.29344	4.94225	1.10766	5e-05	0.00120857	yes
CYP1B1	chr2:38294745-38303323	9.1988	8.42673	-0.126472	0.4363	0.999863	no	7.71435	6.0066	-0.360996	0.00395	0.143601	no	6.59467	3.3821	-0.963383	5e-05	0.00120857	yes
GALM	chr2:38893051-38961909	5.60846	5.5085	-0.0259438	0.8866	0.999863	no	5.37796	6.34456	0.23846	0.07365	0.951195	no	5.2211	10.3602	0.988622	5e-05	0.00120857	yes
C2orf91	chr2:42162507-42180943	0.11161	0.206178	0.885425	1	1	no	0.13922	0.212721	0.611597	1	1	no	0.211082	1.0438	2.30596	5e-05	0.00120857	yes
PKDCC	chr2:42275160-42285668	2.59759	3.50524	0.432341	0.04205	0.999863	no	3.01055	3.62304	0.267174	0.0652	0.902019	no	2.49469	4.93885	0.985313	5e-05	0.00120857	yes
OXER1	chr2:42989638-42991401	3.08992	3.60667	0.223097	0.3231	0.999863	no	4.02384	4.46207	0.149141	0.3131	0.999462	no	4.30841	7.48716	0.797264	0.0004	0.00720053	yes
RHOQ	chr2:46769866-46844251	12.6444	13.2608	0.0686606	0.7133	0.999863	no	13.4863	12.5651	-0.102073	0.4501	0.999462	no	12.4795	19.8349	0.668478	0.00045	0.00792336	yes
SLC1A4	chr2:65215578-65251000	20.8235	19.4797	-0.0962395	0.5474	0.999863	no	21.7449	18.954	-0.198179	0.0918	0.999462	no	20.6117	14.4173	-0.515661	0.00135	0.0197112	yes
PLEK	chr2:68592321-68624585	70.4594	93.335	0.405626	0.0095	0.999863	no	69.9128	88.0753	0.333181	0.0028	0.108785	no	75.9367	120.089	0.661231	5e-05	0.00120857	yes
ANXA4	chr2:69969126-70053596	125.645	121.326	-0.0504543	0.74065	0.999863	no	123.502	121.785	-0.0201976	0.8585	0.999462	no	144.384	91.8023	-0.653305	5e-05	0.00120857	yes
PCYOX1	chr2:70485230-70508317	15.6998	15.4975	-0.0187125	0.90615	0.999863	no	14.2362	14.0818	-0.0157253	0.8942	0.999462	no	17.2018	11.818	-0.541568	0.0012	0.0179423	yes
RNF144A	chr2:7052406-7184309	4.40731	4.12288	-0.0962457	0.5908	0.999863	no	4.46236	3.69324	-0.27292	0.03045	0.582093	no	4.13383	2.52182	-0.713012	0.0003	0.00576447	yes
CYP26B1	chr2:72356366-72374963	0.122209	0.232339	0.926877	1	1	no	0.126019	0.236785	0.909938	1	1	no	0.109716	2.53412	4.52964	5e-05	0.00120857	yes
PRADC1	chr2:73455133-73460356	12.7757	13.3151	0.0596583	0.75585	0.999863	no	12.8855	12.4073	-0.0545683	0.6867	0.999462	no	11.0216	18.4817	0.745767	5e-05	0.00120857	yes
FBXO41	chr2:73481809-73496758	6.22302	7.59227	0.286917	0.08035	0.999863	no	6.85744	8.93026	0.381033	0.0012	0.0552782	no	7.00184	12.9908	0.89169	5e-05	0.00120857	yes
ALMS1	chr2:73612885-73837046	1.45867	1.44698	-0.011604	0.9504	0.999863	no	1.41336	1.25763	-0.168421	0.19765	0.999462	no	1.42204	0.926642	-0.617878	0.0019	0.0259162	yes
BOLA3	chr2:74362527-74375039	51.8334	48.2691	-0.102781	0.5776	0.999863	no	49.5363	51.8187	0.0649872	0.63305	0.999462	no	50.9306	85.9539	0.75503	5e-05	0.00120857	yes
SUCLG1	chr2:84650646-84686586	47.929	48.4712	0.0162275	0.9198	0.999863	no	49.2273	49.8519	0.0181883	0.87735	0.999462	no	48.0099	75.9826	0.662336	0.0002	0.004127	yes
TMEM150A	chr2:85825669-85829822	1.76656	2.30288	0.382496	0.1363	0.999863	no	1.99491	2.53406	0.345128	0.0521	0.801636	no	1.87142	3.64595	0.962159	0.0006	0.0100596	yes
GNLY	chr2:85921413-85925875	0.167222	0.228013	0.447355	1	1	no	0.314557	0.620819	0.980852	0.06	0.869385	no	0.311701	3.51688	3.49606	0.001	0.0155113	yes
KDM3A	chr2:86668270-86719839	19.5424	18.874	-0.0502124	0.75445	0.999863	no	23.8702	20.9362	-0.189209	0.09545	0.999462	no	31.5169	22.8299	-0.465203	0.00375	0.0438869	yes
ID2	chr2:8822112-8824583	53.9518	47.7672	-0.175651	0.2803	0.999863	no	46.861	42.5807	-0.138189	0.235	0.999462	no	53.8942	34.8559	-0.628726	0.0002	0.004127	yes
ADRA2B	chr2:96778622-96781888	0.429497	0.309953	-0.4706	0.17215	0.999863	no	0.375505	0.46577	0.310788	0.15895	0.999462	no	0.56372	0.110214	-2.35467	0.0004	0.00720053	yes
ARID5A	chr2:97202463-97218371	13.1047	11.6422	-0.170729	0.3232	0.999863	no	14.5622	11.7247	-0.312672	0.01285	0.337778	no	12.9459	8.24848	-0.650297	0.00045	0.00792336	yes
YWHAQ	chr2:9724105-9771106	127.319	130.954	0.0406179	0.7904	0.999863	no	120.619	135.061	0.163161	0.14465	0.999462	no	117.604	182.576	0.634565	5e-05	0.00120857	yes
SEMA4C	chr2:97525472-97535735	14.3121	17.5295	0.292546	0.0726	0.999863	no	15.2128	18.8458	0.308953	0.0075	0.229082	no	13.1892	20.0972	0.607639	0.0004	0.00720053	yes
ANKRD36	chr2:97779232-97930257	0.852863	0.900474	0.0783712	0.73305	0.999863	no	0.964381	0.949372	-0.0226305	0.8847	0.999462	no	1.33481	0.738422	-0.854121	0.00035	0.00647074	yes
ANKRD36B	chr2:98121260-98206428	1.04964	0.993533	-0.0792577	0.7109	0.999863	no	1.23566	1.10185	-0.165363	0.2571	0.999462	no	1.5246	0.844096	-0.852953	0.00025	0.00496408	yes
COX5B	chr2:98262520-98264657	295.106	278.35	-0.0843317	0.59275	0.999863	no	308.337	321.809	0.0616993	0.58575	0.999462	no	269.91	400.43	0.569072	0.0007	0.0114966	yes
MGAT4A	chr2:99235568-99347589	4.88556	4.57119	-0.0959542	0.6269	0.999863	no	4.31671	4.72417	0.130129	0.37105	0.999462	no	4.39074	7.02137	0.677288	0.00045	0.00792336	yes
KIAA1211L	chr2:99410308-99552684	0.436626	0.540567	0.308074	0.29575	0.999863	no	0.479084	0.642384	0.423157	0.0291	0.569201	no	0.394088	0.791722	1.00648	0.0029	0.0357432	yes
MKKS	chr20:10385427-10414887	9.62981	10.6906	0.150767	0.42255	0.999863	no	10.376	10.7454	0.0504656	0.70865	0.999462	no	9.11692	14.9941	0.71778	5e-05	0.00120857	yes
SIRPB2	chr20:1455235-1472233	4.55389	4.61317	0.0186609	0.92745	0.999863	no	4.10791	4.97439	0.276113	0.04855	0.769584	no	4.23892	7.41643	0.807027	5e-05	0.00120857	yes
SIRPG	chr20:1609797-1638425	0.38133	0.313797	-0.281208	0.55095	0.999863	no	0.266504	0.495988	0.89615	0.0218	0.48017	no	0.322716	1.22494	1.92437	0.00315	0.0381711	yes
DZANK1	chr20:18364010-18447829	9.37176	8.30093	-0.175047	0.3103	0.999863	no	9.38514	8.69925	-0.109488	0.37275	0.999462	no	9.96662	5.93568	-0.747691	5e-05	0.00120857	yes
CST7	chr20:24929865-24940564	19.7985	18.8489	-0.0709106	0.70425	0.999863	no	24.4788	17.8855	-0.452745	0.00105	0.0510278	no	16.0546	6.85654	-1.22744	5e-05	0.00120857	yes
ACSS1	chr20:24986865-25038818	4.4518	4.73258	0.0882381	0.63615	0.999863	no	4.86985	5.16342	0.0844487	0.5218	0.999462	no	5.06069	7.48236	0.56416	0.00215	0.0284195	yes
IDH3B	chr20:2639040-2644865	24.0314	24.6008	0.0337849	0.8451	0.999863	no	24.5599	24.431	-0.00759427	0.95335	0.999462	no	22.2803	35.6519	0.67821	0.00015	0.00324194	yes
SNTA1	chr20:31995762-32031698	2.44703	2.32309	-0.0749896	0.7381	0.999863	no	2.75536	2.57677	-0.0966767	0.522	0.999462	no	2.65013	1.51468	-0.807047	0.0016	0.0225434	yes
C20orf194	chr20:3229947-3388309	7.90165	7.5875	-0.0585289	0.7217	0.999863	no	7.68218	7.21452	-0.0906133	0.43965	0.999462	no	9.45338	5.55137	-0.767986	5e-05	0.00120857	yes
ACSS2	chr20:33462765-33515769	68.5609	71.3166	0.0568519	0.7173	0.999863	no	66.9651	68.818	0.0393767	0.7245	0.999462	no	116.676	74.4624	-0.647929	5e-05	0.00120857	yes
UQCC	chr20:33890368-33999945	11.7365	11.2624	-0.0594798	0.72695	0.999863	no	11.1855	11.5243	0.0430412	0.72535	0.999462	no	10.9726	17.3953	0.664787	0.0001	0.00223912	yes
ATRN	chr20:3451664-3631769	11.7553	10.9972	-0.0961788	0.56815	0.999863	no	10.4642	10.1693	-0.0412527	0.7376	0.999462	no	11.7104	7.72767	-0.599685	0.00065	0.0108052	yes
EPB41L1	chr20:34679425-34820721	0.373509	0.404925	0.116512	0.6677	0.999863	no	0.326607	0.423363	0.37434	0.04825	0.766687	no	0.456637	1.34372	1.55712	5e-05	0.00120857	yes
MYL9	chr20:35169886-35178226	76.4077	77.3645	0.0179524	0.91265	0.999863	no	77.7998	75.7552	-0.0384204	0.7447	0.999462	no	84.5098	60.4922	-0.482368	0.00295	0.0362614	yes
TGM2	chr20:36756863-36793700	0.492856	0.467614	-0.0758464	0.7922	0.999863	no	0.53012	0.566629	0.096084	0.6202	0.999462	no	0.437049	0.981412	1.16706	0.0004	0.00720053	yes
PPP1R16B	chr20:37434347-37551667	1.95951	2.20444	0.169921	0.36565	0.999863	no	1.92857	2.31886	0.265881	0.04945	0.775301	no	1.64498	4.47477	1.44374	5e-05	0.00120857	yes
TOP1	chr20:39657461-39753126	41.4374	44.1727	0.092222	0.5477	0.999863	no	37.0345	43.6907	0.238453	0.03375	0.623097	no	38.1033	57.5428	0.59472	0.00025	0.00496408	yes
CHD6	chr20:40031169-40247133	4.11175	4.02771	-0.0297937	0.8577	0.999863	no	3.97965	3.99912	0.00704201	0.95305	0.999462	no	5.12327	3.52232	-0.540537	0.0015	0.0214212	yes
TOX2	chr20:42543491-42698254	9.98937	8.66201	-0.205691	0.24085	0.999863	no	10.2892	8.52513	-0.271338	0.03265	0.609955	no	10.706	5.90068	-0.859462	5e-05	0.00120857	yes
SLPI	chr20:43880878-43883206	38.746	38.3431	-0.0150795	0.9341	0.999863	no	41.6842	41.6857	5.14498e-05	0.99705	0.999462	no	37.4805	68.6471	0.873061	5e-05	0.00120857	yes
MMP9	chr20:44637546-44645200	1.44027	1.39547	-0.0455956	0.86075	0.999863	no	1.33056	1.10378	-0.269584	0.13585	0.999462	no	0.963181	0.396581	-1.28019	0.00155	0.0220432	yes
SLC35C2	chr20:44978176-44993064	23.8751	26.9496	0.174757	0.28435	0.999863	no	25.4904	30.2214	0.245615	0.03475	0.63575	no	22.0481	31.7106	0.524306	0.002	0.0267992	yes
SULF2	chr20:46286149-46415360	9.03082	10.1461	0.168003	0.3348	0.999863	no	8.30141	9.3894	0.177677	0.1468	0.999462	no	13.5424	29.6291	1.12954	5e-05	0.00120857	yes
PRNP	chr20:4666796-4682234	8.31726	9.11403	0.131981	0.4571	0.999863	no	8.37737	8.45937	0.0140516	0.9121	0.999462	no	7.50301	15.1254	1.01143	5e-05	0.00120857	yes
SLC23A2	chr20:4833001-4990939	5.90523	6.47941	0.133871	0.41095	0.999863	no	6.40554	6.73731	0.0728537	0.5368	0.999462	no	6.76941	9.60426	0.504644	0.0016	0.0225434	yes
CEBPB	chr20:48807119-48809227	15.9886	17.4665	0.127548	0.4496	0.999863	no	17.4418	22.6784	0.378771	0.0024	0.0961496	no	14.315	24.1327	0.753466	5e-05	0.00120857	yes
BCAS4	chr20:49411466-49493714	0.356611	0.246881	-0.530536	1	1	no	0.320827	0.32754	0.0298735	1	1	no	0.300396	1.18267	1.97711	0.0021	0.0278662	yes
ZNF217	chr20:52183609-52199636	33.0341	28.4682	-0.214607	0.16645	0.999863	no	32.2688	28.5389	-0.177214	0.111	0.999462	no	36.8992	23.8587	-0.629076	5e-05	0.00120857	yes
CYP24A1	chr20:52769987-52790516	0	0.0339914	inf	1	1	no	0.00468997	0.0987441	4.39604	1	1	no	0.0633959	21.8762	8.43076	0.0003	0.00576447	yes
CASS4	chr20:54987167-55034396	2.21168	1.84995	-0.257652	0.27035	0.999863	no	1.84674	1.82492	-0.0171504	0.92005	0.999462	no	2.05886	1.15703	-0.83142	0.003	0.0367769	yes
SYCP2	chr20:58438617-58507209	0.509802	0.662491	0.377966	0.14805	0.999863	no	0.536241	0.682556	0.348067	0.0454	0.739648	no	0.63117	1.39135	1.14038	5e-05	0.00120857	yes
CDH26	chr20:58533470-58588168	0.344782	0.229073	-0.589878	1	1	no	0.33592	0.271338	-0.308026	1	1	no	0.26056	0.990279	1.92622	0.0002	0.004127	yes
LOC284757	chr20:58713547-58897314	0.126356	0.132986	0.0737799	1	1	no	0.206736	0.178438	-0.212372	1	1	no	0.11465	1.06669	3.21783	0.00175	0.0241348	yes
HELZ2	chr20:62189438-62205592	12.6457	13.3763	0.0810359	0.611	0.999863	no	13.6743	10.6631	-0.358834	0.0021	0.0870915	no	8.91068	5.4601	-0.706608	5e-05	0.00120857	yes
SRXN1	chr20:627267-634014	10.0223	11.0544	0.141415	0.4142	0.999863	no	9.8851	9.4384	-0.066713	0.58865	0.999462	no	7.25371	11.2352	0.631233	0.0005	0.0086261	yes
BMP2	chr20:6748744-6760910	1.2476	0.780939	-0.675878	0.0121	0.999863	no	1.02049	0.814024	-0.326124	0.0671	0.911554	no	0.972148	0.322772	-1.59066	0.0002	0.004127	yes
NRIP1	chr21:16333555-16437126	5.34286	6.28659	0.234664	0.15545	0.999863	no	5.12295	6.26631	0.290641	0.01555	0.387162	no	5.15779	12.033	1.22217	5e-05	0.00120857	yes
MIR155HG	chr21:26934456-26947480	7.6561	7.06771	-0.115367	0.55815	0.999863	no	10.1854	7.61701	-0.419213	0.00245	0.0975997	no	9.91463	6.12321	-0.695271	0.0008	0.0129218	yes
ATP5J	chr21:27096790-27144771	172.126	171.197	-0.00780258	0.9698	0.999863	no	174.761	174.425	-0.00277157	0.98585	0.999462	no	165.109	255.61	0.630525	0.00255	0.0325738	yes
ATP5O	chr21:35275756-35288158	244.96	238.638	-0.0377265	0.80395	0.999863	no	242.775	243.742	0.00573716	0.9594	0.999462	no	234.838	383.655	0.708146	5e-05	0.00120857	yes
ETS2	chr21:40177230-40196878	20.5178	19.0997	-0.103325	0.521	0.999863	no	20.293	17.5965	-0.205691	0.0777	0.972419	no	20.5288	13.2872	-0.627611	0.00025	0.00496408	yes
C21orf33	chr21:45553493-45565605	39.1934	38.2038	-0.036893	0.8216	0.999863	no	41.2208	41.2309	0.000353771	0.9974	0.999462	no	38.7442	61.7051	0.671409	0.0001	0.00223912	yes
LRRC3	chr21:45875392-45878739	3.61079	3.56331	-0.0190972	0.9227	0.999863	no	3.20235	3.46128	0.112173	0.43455	0.999462	no	3.74203	2.29499	-0.70533	0.00265	0.0334761	yes
PTTG1IP	chr21:46269499-46293818	66.9287	65.4629	-0.0319491	0.83615	0.999863	no	68.29	65.8009	-0.0535657	0.63175	0.999462	no	77.228	49.5995	-0.638799	5e-05	0.00120857	yes
ITGB2	chr21:46305867-46349595	402.04	423.513	0.0750644	0.6388	0.999863	no	396.494	455.959	0.201605	0.08645	0.999462	no	434.098	676.7	0.640497	5e-05	0.00120857	yes
C21orf67	chr21:46353198-46359828	5.35788	4.99469	-0.101267	0.6421	0.999863	no	5.88717	5.92252	0.00863739	0.9538	0.999462	no	10.1638	5.81558	-0.805445	0.00025	0.00496408	yes
ADARB1	chr21:46494492-46646478	4.01239	3.61946	-0.148688	0.4343	0.999863	no	4.0659	3.6852	-0.141833	0.3218	0.999462	no	3.80931	2.18646	-0.800933	0.0001	0.00223912	yes
LSS	chr21:47608359-47648738	85.363	89.4151	0.0669074	0.6664	0.999863	no	84.2613	87.3149	0.0513574	0.6444	0.999462	no	111.584	75.9261	-0.555463	0.0004	0.00720053	yes
CECR1	chr22:17660191-17690779	10.4448	10.8766	0.0584443	0.7366	0.999863	no	9.65684	11.5849	0.262622	0.0358	0.646595	no	9.88149	32.9542	1.73766	5e-05	0.00120857	yes
USP18	chr22:18632757-18660162	7.3612	7.76911	0.0778083	0.67365	0.999863	no	7.31011	5.39408	-0.438516	0.0011	0.0523778	no	5.15364	3.15965	-0.705829	0.0016	0.0225434	yes
PRODH	chr22:18900286-18924066	2.73706	2.82192	0.0440514	0.8477	0.999863	no	3.65284	2.87955	-0.343177	0.0247	0.510683	no	4.97164	1.3264	-1.90621	5e-05	0.00120857	yes
SEPT5	chr22:19701986-19712297	17.7261	19.202	0.115377	0.5881	0.999863	no	20.3419	18.3924	-0.145346	0.40965	0.999462	no	20.5169	11.3329	-0.856296	5e-05	0.00120857	yes
RTN4R	chr22:20228937-20255816	5.36839	5.04559	-0.0894674	0.65015	0.999863	no	6.34598	5.71735	-0.150496	0.27175	0.999462	no	6.342	3.7254	-0.767545	0.0004	0.00720053	yes
CHCHD10	chr22:24105207-24110141	50.7271	48.1741	-0.0745005	0.6654	0.999863	no	56.9847	58.8052	0.0453693	0.71415	0.999462	no	50.6762	116.99	1.207	5e-05	0.00120857	yes
TTC28	chr22:28315363-29075853	1.45305	1.50372	0.0494463	0.81315	0.999863	no	1.4054	1.39269	-0.0131142	0.9289	0.999462	no	1.50547	0.891764	-0.75548	0.00095	0.0148707	yes
EMID1	chr22:29601900-29655586	1.71659	1.93694	0.174239	0.4742	0.999863	no	2.06329	2.34539	0.184882	0.25115	0.999462	no	2.2083	1.00715	-1.13266	0.0002	0.004127	yes
RFPL1-AS1	chr22:29833003-29838444	0.682543	0.746049	0.128352	0.61635	0.999863	no	0.708869	0.790631	0.157485	0.38285	0.999462	no	0.740435	1.33946	0.855202	0.0009	0.014251	yes
UQCR10	chr22:30163357-30166402	72.381	67.4209	-0.102416	0.5209	0.999863	no	72.0408	72.7189	0.0135164	0.9075	0.999462	no	66.596	110.64	0.732369	5e-05	0.00120857	yes
OSM	chr22:30658818-30662829	1.17981	1.847	0.646638	0.0179	0.999863	no	1.3486	1.6974	0.331871	0.0723	0.942366	no	1.08361	2.36616	1.1267	0.00025	0.00496408	yes
MTFP1	chr22:30821610-30825041	13.1948	12.135	-0.120797	0.52765	0.999863	no	15.9284	15.4788	-0.0413024	0.7509	0.999462	no	14.7305	26.2253	0.832151	5e-05	0.00120857	yes
NCF4	chr22:37257029-37274059	172.858	191.825	0.150208	0.33915	0.999863	no	180.572	224.423	0.31365	0.00605	0.19534	no	176.819	332.556	0.911322	5e-05	0.00120857	yes
KCTD17	chr22:37447778-37459430	4.2677	4.20654	-0.0208243	0.91955	0.999863	no	4.70391	4.92554	0.066421	0.6406	0.999462	no	3.94627	7.92248	1.00546	5e-05	0.00120857	yes
LGALS1	chr22:38071612-38075809	3545.11	3717.38	0.0684567	0.66665	0.999863	no	3806.61	3657.68	-0.0575786	0.62305	0.999462	no	3447.96	2484.86	-0.472581	0.0033	0.0395335	yes
MCHR1	chr22:41075181-41078818	0.0959159	0.280754	1.54946	1	1	no	0.213249	0.308685	0.533595	1	1	no	0.189831	0.809291	2.09194	0.0005	0.0086261	yes
ACO2	chr22:41865128-41940479	31.7868	30.804	-0.045314	0.8341	0.999863	no	29.6834	31.2143	0.0725527	0.66755	0.999462	no	29.4935	64.0065	1.11782	5e-05	0.00120857	yes
SEPT5	chr22:42372930-42394225	6.0136	7.4405	0.30717	0.0923	0.999863	no	6.45256	8.64231	0.421547	0.00335	0.125999	no	7.14659	13.2072	0.885995	5e-05	0.00120857	yes
NDUFA6	chr22:42481529-42486888	71.5094	74.741	0.0637667	0.6888	0.999863	no	68.8163	71.8207	0.0616486	0.5945	0.999462	no	62.9708	99.5683	0.661003	5e-05	0.00120857	yes
NFAM1	chr22:42776413-42828401	8.56675	9.21028	0.104496	0.5211	0.999863	no	8.39709	10.4317	0.313017	0.0072	0.223295	no	7.99966	13.5041	0.755382	5e-05	0.00120857	yes
A4GALT	chr22:43088126-43116876	9.40027	9.62882	0.034656	0.8497	0.999863	no	10.1445	9.10669	-0.155699	0.23105	0.999462	no	9.18081	5.87553	-0.643904	0.00085	0.0135534	yes
BIK	chr22:43506753-43525718	34.4481	33.4634	-0.0418412	0.80705	0.999863	no	36.5382	35.7321	-0.0321867	0.79575	0.999462	no	37.7389	25.6701	-0.555963	0.00235	0.0306778	yes
LOC100506714	chr22:45529638-45559662	2.58952	3.27761	0.339962	0.17255	0.999863	no	2.83342	2.82183	-0.00591756	0.97205	0.999462	no	2.59263	4.64953	0.842667	0.00165	0.0230814	yes
UPK3A	chr22:45680867-45691755	2.31796	1.9374	-0.258735	0.45925	0.999863	no	2.46608	2.71338	0.137871	0.5226	0.999462	no	1.86265	4.59496	1.30269	0.0009	0.014251	yes
WNT7B	chr22:46316247-46373008	6.75061	6.79179	0.00877423	0.9593	0.999863	no	6.51376	6.35939	-0.0346021	0.7811	0.999462	no	6.58677	3.68831	-0.836612	5e-05	0.00120857	yes
CELSR1	chr22:46756730-46933067	2.66703	2.57231	-0.0521692	0.7585	0.999863	no	2.46963	2.59441	0.0711135	0.5694	0.999462	no	2.53156	1.56399	-0.694802	0.0002	0.004127	yes
MLC1	chr22:50497819-50524358	58.0735	54.3633	-0.0952454	0.5337	0.999863	no	57.4282	54.7342	-0.0693167	0.5334	0.999462	no	53.2567	30.8621	-0.787127	5e-05	0.00120857	yes
HHLA2	chr3:108021331-108097126	1.19207	1.1939	0.00221731	0.9855	0.999863	no	1.22168	1.05767	-0.207977	0.2466	0.999462	no	1.46192	0.437075	-1.74192	5e-05	0.00120857	yes
C3orf52	chr3:111805181-111837073	0.0301059	0.1214	2.01165	1	1	no	0.014783	0.137708	3.2196	1	1	no	0	0.832789	inf	5e-05	0.00120857	yes
KIAA1407	chr3:113682983-113775460	1.68095	1.66938	-0.00996582	0.95985	0.999863	no	1.69315	1.74566	0.0440613	0.7647	0.999462	no	2.13815	1.2981	-0.719957	0.00225	0.0295983	yes
ADPRH	chr3:119298522-119308792	5.39655	5.6858	0.0753268	0.6788	0.999863	no	5.43538	5.75497	0.0824268	0.5255	0.999462	no	4.70032	7.47398	0.669118	0.0003	0.00576447	yes
EAF2	chr3:121554033-121605373	45.2877	45.2858	-6.01457e-05	0.9985	0.999863	no	42.02	43.7208	0.0572454	0.63605	0.999462	no	48.9972	34.1605	-0.52037	0.00275	0.0342336	yes
SLC15A2	chr3:121613170-121663034	5.11636	5.37201	0.0703445	0.6874	0.999863	no	5.7308	5.33121	-0.104271	0.39845	0.999462	no	7.09575	4.89235	-0.536427	0.0021	0.0278662	yes
PPARG	chr3:12329348-12475855	5.29634	5.71891	0.110744	0.57985	0.999863	no	5.6138	5.43026	-0.0479543	0.735	0.999462	no	4.69942	8.74244	0.895554	5e-05	0.00120857	yes
KALRN	chr3:123813557-124440036	0.685742	0.725935	0.0821743	0.7375	0.999863	no	0.547887	0.713022	0.380069	0.0245	0.50878	no	0.654534	1.52714	1.22229	5e-05	0.00120857	yes
EFCAB12	chr3:129120163-129147494	0.448189	0.495768	0.14556	0.6893	0.999863	no	0.612405	0.745844	0.284388	0.2032	0.999462	no	0.456965	1.19273	1.38411	0.00105	0.0160683	yes
IQSEC1	chr3:12938541-13114617	6.52555	7.13456	0.128724	0.434	0.999863	no	7.47639	6.63023	-0.173283	0.1379	0.999462	no	6.88549	4.71667	-0.545791	0.00085	0.0135534	yes
NUP210	chr3:13357736-13461809	61.1212	60.5508	-0.0135262	0.93055	0.999863	no	56.7865	65.5227	0.206448	0.06345	0.890188	no	60.6942	101.784	0.745879	5e-05	0.00120857	yes
EPHB1	chr3:134514098-134979307	2.99048	3.00452	0.00676184	0.9718	0.999863	no	2.73792	2.73439	-0.00186433	0.9872	0.999462	no	3.28107	1.49539	-1.13364	5e-05	0.00120857	yes
PPP2R3A	chr3:135684514-135866752	2.80752	2.77003	-0.0193961	0.92115	0.999863	no	2.68173	2.69784	0.00864003	0.95335	0.999462	no	2.46901	3.65256	0.564976	0.0032	0.0387084	yes
MRAS	chr3:138066489-138124377	7.17219	7.38808	0.0427861	0.8026	0.999863	no	7.18379	6.46704	-0.15164	0.2229	0.999462	no	5.64987	8.26987	0.549646	0.00185	0.0253606	yes
CLSTN2	chr3:139654026-140286919	5.31667	4.75361	-0.1615	0.35555	0.999863	no	4.65993	4.62267	-0.011584	0.9267	0.999462	no	5.45913	2.97177	-0.877347	5e-05	0.00120857	yes
CHCHD4	chr3:14153576-14166371	13.3012	13.5838	0.0303265	0.87025	0.999863	no	12.5228	13.7003	0.129657	0.3264	0.999462	no	12.8057	21.0311	0.715734	0.0001	0.00223912	yes
SLC9A9	chr3:142984063-143567373	0.332303	0.412763	0.312814	0.34055	0.999863	no	0.268634	0.337378	0.328723	1	1	no	0.275228	0.682712	1.31065	0.001	0.0155113	yes
SH3BP5	chr3:15295690-15382901	14.54	13.0489	-0.1561	0.36985	0.999863	no	14.1301	10.712	-0.399552	0.0026	0.102137	no	16.0181	5.5631	-1.52574	5e-05	0.00120857	yes
C3orf80	chr3:159943422-159946000	9.40777	7.9253	-0.247387	0.16645	0.999863	no	10.2289	8.78017	-0.220334	0.08055	0.988716	no	10.9751	5.8715	-0.902431	5e-05	0.00120857	yes
SERPINI2	chr3:167159576-167191920	5.97324	5.93481	-0.00931148	0.96435	0.999863	no	6.34374	5.39183	-0.234558	0.10275	0.999462	no	6.64439	4.28066	-0.634306	0.0043	0.0490645	yes
WDR49	chr3:167196472-167371289	7.50635	6.22283	-0.270541	0.14745	0.999863	no	7.22371	6.47663	-0.157495	0.22855	0.999462	no	8.08577	4.50238	-0.844696	5e-05	0.00120857	yes
GPR160	chr3:169755734-169803183	98.746	93.4434	-0.0796302	0.609	0.999863	no	88.8756	86.5337	-0.038525	0.728	0.999462	no	102.405	69.1703	-0.566056	0.0007	0.0114966	yes
TNIK	chr3:170780291-171178197	1.27152	1.39267	0.1313	0.61215	0.999863	no	1.13934	1.11447	-0.0318389	0.8823	0.999462	no	1.58261	0.666601	-1.24741	5e-05	0.00120857	yes
PLD1	chr3:171318194-171528284	4.01948	3.56652	-0.172491	0.3297	0.999863	no	3.79771	3.36434	-0.17481	0.16915	0.999462	no	4.42291	2.46122	-0.845623	5e-05	0.00120857	yes
NDUFB5	chr3:179322574-179342288	86.6105	82.9651	-0.0620364	0.70015	0.999863	no	85.5396	81.7397	-0.0655564	0.5799	0.999462	no	88.7479	152.85	0.784331	5e-05	0.00120857	yes
PEX5L	chr3:179512746-179754841	0.350746	0.460287	0.392108	0.10735	0.999863	no	0.37578	0.542077	0.528607	0.0012	0.0552782	no	0.391508	2.30886	2.56007	5e-05	0.00120857	yes
B3GNT5	chr3:182895830-183145855	6.6855	5.84147	-0.194706	0.2733	0.999863	no	6.68751	5.91802	-0.176356	0.16265	0.999462	no	7.52487	5.22707	-0.525664	0.00345	0.0410073	yes
CCDC50	chr3:190984943-191116459	4.12011	4.6712	0.181108	0.28055	0.999863	no	4.14968	4.91297	0.243597	0.043	0.720426	no	4.63322	6.74845	0.54254	0.00125	0.0184281	yes
ATP13A3	chr3:194123402-194188968	37.6305	33.7318	-0.157793	0.3076	0.999863	no	33.5017	29.932	-0.162546	0.14455	0.999462	no	38.0096	25.6018	-0.57012	0.00035	0.00647074	yes
FLJ34208	chr3:194207868-194209274	1.67468	1.22994	-0.445296	0.1858	0.999863	no	1.53459	1.6288	0.0859603	0.68715	0.999462	no	2.42429	0.489131	-2.30927	0.0002	0.004127	yes
XXYLT1	chr3:194789012-194991895	3.54925	3.84841	0.116745	0.55495	0.999863	no	3.55962	4.19835	0.2381	0.08835	0.999462	no	3.61838	6.56477	0.859399	5e-05	0.00120857	yes
SLC51A	chr3:195943382-195960301	1.59116	1.7729	0.156036	0.5755	0.999863	no	1.86209	2.04505	0.135213	0.4605	0.999462	no	1.93641	0.877299	-1.14224	0.0012	0.0179423	yes
BDH1	chr3:197236653-197300194	4.1802	3.77511	-0.147052	0.4401	0.999863	no	4.46072	4.19589	-0.0882982	0.50305	0.999462	no	4.51831	6.70624	0.569722	0.0016	0.0225434	yes
CNTN4	chr3:2140549-3099645	7.58498	7.25113	-0.0649391	0.7068	0.999863	no	7.33374	7.03588	-0.0598175	0.6464	0.999462	no	7.79646	5.14824	-0.59874	0.00075	0.0122152	yes
LRRC3B	chr3:26664299-26752265	2.05157	2.68102	0.386056	0.1196	0.999863	no	2.1653	2.53402	0.226859	0.18285	0.999462	no	1.90367	7.0281	1.88435	5e-05	0.00120857	yes
CMTM7	chr3:32433162-32496333	35.2908	34.2226	-0.0443438	0.7905	0.999863	no	35.0138	39.8171	0.185464	0.1197	0.999462	no	30.8974	45.3139	0.552469	0.0012	0.0179423	yes
ITGA9	chr3:37493812-37861281	0.647851	0.609831	-0.0872539	0.7481	0.999863	no	0.655244	0.682332	0.0584419	0.746	0.999462	no	0.682667	0.349051	-0.967745	0.00395	0.0457578	yes
CX3CR1	chr3:39304984-39323226	20.2326	16.3751	-0.30518	0.06325	0.999863	no	17.3983	17.1829	-0.0179676	0.8818	0.999462	no	20.9427	14.1194	-0.568771	0.0006	0.0100596	yes
HIGD1A	chr3:42824399-42846027	14.9962	15.0315	0.00338842	0.9819	0.999863	no	14.6463	13.8181	-0.0839791	0.48115	0.999462	no	13.2089	19.4203	0.556052	0.00105	0.0160683	yes
EXOSC7	chr3:45017740-45054158	32.4617	36.0863	0.152713	0.3694	0.999863	no	35.2786	39.6914	0.170033	0.16385	0.999462	no	32.9344	47.9716	0.542583	0.00245	0.031651	yes
ITPR1	chr3:4535031-4889524	16.7375	17.8139	0.0899222	0.56255	0.999863	no	15.0663	17.7492	0.236429	0.0386	0.669793	no	17.7253	26.4323	0.576494	0.0003	0.00576447	yes
NBEAL2	chr3:46963230-47051194	21.4155	21.8617	0.0297493	0.8619	0.999863	no	23.653	25.0491	0.0827339	0.5084	0.999462	no	26.7592	18.8187	-0.507868	0.0035	0.0415295	yes
COL7A1	chr3:48601505-48632593	0.968564	1.06502	0.136965	0.48605	0.999863	no	1.38371	1.33605	-0.0505705	0.7039	0.999462	no	1.33545	2.48642	0.89674	5e-05	0.00120857	yes
UQCRC1	chr3:48636431-48647098	95.5568	96.0599	0.00757523	0.9631	0.999863	no	101.254	106.155	0.0681954	0.53565	0.999462	no	91.5183	173.341	0.921483	5e-05	0.00120857	yes
SLC25A20	chr3:48894355-48936426	10.4029	11.6536	0.163789	0.3615	0.999863	no	10.1212	12.4634	0.300316	0.0208	0.46508	no	10.5872	16.8145	0.667386	0.00015	0.00324194	yes
QARS	chr3:49133364-49142562	76.0586	80.3233	0.078707	0.60885	0.999863	no	79.4912	85.071	0.0978722	0.37735	0.999462	no	74.75	108.975	0.54385	0.0006	0.0100596	yes
C3orf62	chr3:49306029-49314508	4.97935	5.30213	0.0906141	0.6148	0.999863	no	5.48382	4.92121	-0.156168	0.22735	0.999462	no	4.61638	6.93564	0.587267	0.00165	0.0230814	yes
TEX264	chr3:51705221-51738339	50.7743	55.6556	0.132428	0.4322	0.999863	no	51.6568	63.8192	0.305032	0.0125	0.332284	no	44.3727	73.1732	0.721644	5e-05	0.00120857	yes
DUSP7	chr3:52082936-52090461	37.3318	33.7963	-0.14354	0.3503	0.999863	no	40.2232	34.5429	-0.219641	0.0528	0.805499	no	39.0629	27.1524	-0.524716	0.00115	0.0173082	yes
TWF2	chr3:52262625-52273183	52.035	51.2567	-0.0217413	0.88825	0.999863	no	52.3852	55.8733	0.0930024	0.41275	0.999462	no	45.7063	64.6599	0.500478	0.0017	0.023564	yes
CACNA2D3	chr3:54156692-55108584	6.73572	6.83244	0.0205697	0.9062	0.999863	no	6.32793	6.91496	0.127987	0.3263	0.999462	no	7.36297	4.43638	-0.730905	0.00035	0.00647074	yes
FLNB	chr3:57994126-58157982	16.5837	16.769	0.0160289	0.9172	0.999863	no	15.9054	16.8225	0.0808753	0.473	0.999462	no	17.5181	11.9617	-0.55043	0.0005	0.0086261	yes
PXK	chr3:58318616-58410878	65.2618	62.7575	-0.0564504	0.7173	0.999863	no	61.7733	60.5283	-0.0293718	0.7956	0.999462	no	70.2544	46.0121	-0.610576	0.00025	0.00496408	yes
LRIG1	chr3:66119284-66550845	8.21646	8.71692	0.0852999	0.64055	0.999863	no	8.04775	9.5397	0.245359	0.07245	0.942583	no	7.70989	12.1765	0.659323	0.0005	0.0086261	yes
FAM86DP	chr3:75470702-75484266	1.71994	1.764	0.0364921	0.8755	0.999863	no	1.70709	1.96909	0.205996	0.20905	0.999462	no	1.52888	2.91948	0.933232	0.0003	0.00576447	yes
SRGAP3	chr3:9022275-9291369	0.792887	0.863438	0.122978	0.55585	0.999863	no	0.805393	0.792179	-0.0238668	0.87345	0.999462	no	1.12021	0.729168	-0.619443	0.00435	0.0495111	yes
CAMK1	chr3:9791627-9811668	60.2528	59.1969	-0.025505	0.8846	0.999863	no	61.4478	58.321	-0.0753459	0.56105	0.999462	no	65.2972	37.7381	-0.791001	5e-05	0.00120857	yes
IL17RE	chr3:9944295-9958084	1.25373	1.23923	-0.0167801	0.9475	0.999863	no	1.56034	1.37837	-0.178892	0.2872	0.999462	no	1.42826	0.782497	-0.868104	0.00305	0.0372896	yes
FGFRL1	chr4:1005609-1020686	14.3906	14.218	-0.0174075	0.9161	0.999863	no	14.4506	13.93	-0.0529379	0.6581	0.999462	no	14.1425	9.94447	-0.508069	0.00325	0.0391402	yes
DDIT4L	chr4:101107026-101111655	0.527617	0.508274	-0.0538849	0.8701	0.999863	no	0.658268	0.52822	-0.317536	0.13895	0.999462	no	0.676078	1.27991	0.920784	0.0038	0.0443582	yes
PPP3CA	chr4:101944586-102268628	24.1329	27.3213	0.179024	0.25355	0.999863	no	22.8551	28.567	0.321831	0.00445	0.156159	no	23.4634	32.2102	0.457102	0.00415	0.0475512	yes
FLJ20021	chr4:102268933-102270040	5.65207	8.08646	0.51673	0.0341	0.999863	no	6.89142	9.73343	0.498146	0.00235	0.0944139	no	6.03857	11.089	0.876848	0.00095	0.0148707	yes
BANK1	chr4:102711763-102995969	8.69635	8.283	-0.0702566	0.6926	0.999863	no	8.15721	7.92838	-0.0410507	0.75115	0.999462	no	8.94328	5.45717	-0.712653	0.0002	0.004127	yes
DKK2	chr4:107842958-107957453	2.59512	2.26349	-0.197253	0.33575	0.999863	no	2.25622	1.86832	-0.272168	0.06075	0.873096	no	1.86039	2.89874	0.639826	0.0029	0.0357432	yes
LOC100130872,SPON2	chr4:1160720-1202750	4.76473	4.86416	0.0297949	0.86895	0.999863	no	6.09064	5.00216	-0.284045	0.041	0.699423	no	8.40834	4.38037	-0.94077	5e-05	0.00120857	yes
NDST3	chr4:118955499-119179789	0.170059	0.183427	0.109175	1	1	no	0.11864	0.196574	0.728482	1	1	no	0.21153	0.547743	1.37264	0.00025	0.00496408	yes
PRSS12	chr4:119201192-119273922	45.6503	43.5186	-0.0689949	0.64775	0.999863	no	44.3496	42.532	-0.0603702	0.5815	0.999462	no	47.7652	31.4699	-0.601989	5e-05	0.00120857	yes
SYNPO2	chr4:119809995-119982402	1.30824	1.28624	-0.0244696	0.9012	0.999863	no	1.45756	1.33007	-0.132056	0.3406	0.999462	no	1.49927	0.779647	-0.943369	5e-05	0.00120857	yes
CCRN4L	chr4:139936942-139967095	9.65045	12.345	0.355256	0.05075	0.999863	no	10.1212	12.0658	0.253541	0.04865	0.769584	no	9.54756	20.3662	1.09297	5e-05	0.00120857	yes
TBC1D9	chr4:141541935-141677471	1.49678	1.30981	-0.19251	0.3602	0.999863	no	1.29369	1.29207	-0.00180647	0.99305	0.999462	no	1.19919	2.04016	0.766621	0.00035	0.00647074	yes
FHDC1	chr4:153864134-153900848	0.618073	0.651191	0.0753044	0.7533	0.999863	no	0.622975	0.494227	-0.334001	0.04865	0.769584	no	0.675116	0.382691	-0.818956	0.0024	0.0311227	yes
TRIM2	chr4:154074269-154260474	0.267852	0.326116	0.283946	1	1	no	0.2727	0.336436	0.303018	1	1	no	0.254899	0.560974	1.13801	0.0003	0.00576447	yes
PDGFC	chr4:157682762-157892546	2.64573	3.09001	0.223946	0.27555	0.999863	no	2.87208	3.43981	0.260231	0.0722	0.942366	no	2.71372	4.64922	0.776716	0.00025	0.00496408	yes
RXFP1	chr4:159442865-159574521	14.5304	13.2235	-0.135962	0.41245	0.999863	no	14.9104	12.4709	-0.257763	0.03535	0.64257	no	17.7869	10.424	-0.770898	5e-05	0.00120857	yes
FGFR3	chr4:1795038-1810599	1.36334	1.21635	-0.164586	0.45095	0.999863	no	1.32168	1.29167	-0.0331286	0.82705	0.999462	no	1.27096	0.671898	-0.919603	0.0003	0.00576447	yes
WWC2	chr4:184020462-184241929	3.01321	3.24967	0.108991	0.5379	0.999863	no	2.70217	3.14587	0.219341	0.0984	0.999462	no	2.87513	4.76926	0.73014	5e-05	0.00120857	yes
ING2	chr4:184426219-184432249	16.8483	16.6069	-0.0208232	0.91035	0.999863	no	16.6547	15.2654	-0.125665	0.33875	0.999462	no	18.3202	11.5182	-0.669524	0.00055	0.00937055	yes
ACSL1	chr4:185676748-185747215	11.2415	14.1592	0.332896	0.0411	0.999863	no	10.6791	13.8876	0.379005	0.00165	0.0715776	no	9.85509	30.1032	1.61098	5e-05	0.00120857	yes
SLC25A4	chr4:186064416-186071538	0.966469	1.18988	0.300021	0.20265	0.999863	no	1.02349	1.21271	0.244739	0.12285	0.999462	no	0.961427	2.34545	1.28662	5e-05	0.00120857	yes
RBPJ	chr4:26321331-26436752	36.6626	33.6098	-0.125428	0.4242	0.999863	no	36.4903	32.8598	-0.15119	0.1768	0.999462	no	40.305	28.6837	-0.490729	0.00145	0.0208377	yes
PCDH7	chr4:30722029-31148423	1.74133	1.22126	-0.511812	0.0169	0.999863	no	1.3354	1.33938	0.00429224	0.9796	0.999462	no	1.57753	0.924088	-0.771568	0.00175	0.0241348	yes
RGS12	chr4:3315873-3441640	5.27604	5.38632	0.0298431	0.86865	0.999863	no	5.75682	5.86389	0.0265848	0.8315	0.999462	no	5.88228	4.06101	-0.534538	0.0039	0.0454093	yes
WDR19	chr4:39184023-39287430	1.28884	1.27585	-0.0146229	0.94715	0.999863	no	1.3476	1.15108	-0.22741	0.14025	0.999462	no	1.25174	0.716966	-0.803953	0.0021	0.0278662	yes
RHOH	chr4:40198526-40246281	0.951253	1.70506	0.841924	0.0037	0.62116	no	0.964697	1.39412	0.531208	0.0058	0.188128	no	0.849071	2.27493	1.42187	5e-05	0.00120857	yes
TEC	chr4:48137799-48271814	13.782	13.4699	-0.033042	0.8387	0.999863	no	14.7408	12.1556	-0.278192	0.0206	0.463156	no	15.6538	10.0474	-0.639687	0.00035	0.00647074	yes
LNX1	chr4:54326436-54457753	0.52568	0.544985	0.0520339	0.8681	0.999863	no	0.438866	0.618705	0.495469	0.0219	0.48017	no	0.382024	2.565	2.74723	5e-05	0.00120857	yes
KIT	chr4:55524094-55606881	2.17475	1.82543	-0.252609	0.20145	0.999863	no	1.84941	1.62367	-0.187805	0.1954	0.999462	no	2.66239	0.804852	-1.72593	5e-05	0.00120857	yes
IGFBP7	chr4:57845108-58071465	179.995	183.496	0.0277951	0.901	0.999863	no	159.238	214.883	0.432365	0.0172	0.41019	no	167.667	392.343	1.22651	5e-05	0.00120857	yes
STATH	chr4:70861647-70868173	0.0512321	0.280833	2.45459	1	1	no	0.0743136	0.254264	1.77463	1	1	no	0	1.18791	inf	5e-05	0.00120857	yes
AFAP1	chr4:7755816-7941653	1.23038	1.30259	0.0822765	0.6803	0.999863	no	1.14516	1.19199	0.0578269	0.6861	0.999462	no	0.97238	1.63906	0.753277	0.0004	0.00720053	yes
CCNG2	chr4:78078356-78091213	10.3316	9.89887	-0.0617219	0.7108	0.999863	no	10.6999	10.5862	-0.0154208	0.8965	0.999462	no	13.7615	8.70647	-0.660478	5e-05	0.00120857	yes
BMP2K	chr4:79697531-79833341	8.42114	7.55194	-0.157167	0.37035	0.999863	no	7.70695	7.17634	-0.102912	0.4299	0.999462	no	9.22014	6.05394	-0.606914	0.0006	0.0100596	yes
ANTXR2	chr4:80822770-80994477	11.1675	10.4632	-0.0939846	0.64555	0.999863	no	10.0574	9.81548	-0.0351306	0.8506	0.999462	no	10.8743	6.83073	-0.670809	0.00145	0.0208377	yes
SCD5	chr4:83550689-83720010	2.57476	2.73933	0.0893818	0.67425	0.999863	no	2.64911	2.80071	0.0802867	0.5885	0.999462	no	2.83469	4.53635	0.678339	0.00155	0.0220432	yes
PLAC8	chr4:84011210-84035911	156.644	140.736	-0.154495	0.31715	0.999863	no	144.431	138.837	-0.0569806	0.6	0.999462	no	170.358	109.542	-0.637086	5e-05	0.00120857	yes
CPZ	chr4:8594386-8621488	0.650889	0.442563	-0.556527	0.1005	0.999863	no	0.664616	0.378384	-0.81267	0.0012	0.0552782	no	0.57279	0.155528	-1.88084	0.0023	0.030169	yes
SPP1	chr4:88896801-88904563	12.1893	15.409	0.338154	0.0729	0.999863	no	12.2371	9.39578	-0.38118	0.00485	0.166074	no	15.2541	22.4469	0.557322	0.0019	0.0259162	yes
TMEM175	chr4:926261-952443	18.6529	18.3503	-0.0236021	0.8897	0.999863	no	20.7384	22.6456	0.126927	0.296	0.999462	no	18.2264	25.9126	0.507629	0.0034	0.0405186	yes
SLCO4C1	chr5:101569691-101632253	4.16504	3.925	-0.0856362	0.634	0.999863	no	3.70577	3.07859	-0.267503	0.04	0.687339	no	6.87588	2.91881	-1.23616	5e-05	0.00120857	yes
ANKRD33B	chr5:10564434-10657928	1.58122	1.47396	-0.101337	0.5857	0.999863	no	1.57672	1.39304	-0.178683	0.17945	0.999462	no	1.75454	0.865362	-1.01972	5e-05	0.00120857	yes
DAP	chr5:10679341-10761387	85.8726	94.669	0.140695	0.3638	0.999863	no	86.3595	99.1859	0.199781	0.06905	0.922973	no	84.4775	131.967	0.643538	5e-05	0.00120857	yes
PJA2	chr5:108670409-108745675	41.0562	38.2378	-0.102602	0.5078	0.999863	no	37.319	35.1168	-0.0877507	0.43055	0.999462	no	44.5017	32.0871	-0.471866	0.00315	0.0381711	yes
NREP	chr5:110834021-111353003	75.7559	72.2072	-0.069216	0.7165	0.999863	no	74.2859	70.4626	-0.0762303	0.6275	0.999462	no	93.4138	43.6681	-1.09706	5e-05	0.00120857	yes
TRIM36	chr5:114460458-114516243	5.06455	4.84637	-0.0635272	0.72455	0.999863	no	5.47309	4.54111	-0.269309	0.0353	0.642487	no	5.90241	3.88598	-0.603027	0.00135	0.0197112	yes
SEMA6A	chr5:115779250-115910551	1.73345	1.54374	-0.167212	0.388	0.999863	no	1.99586	1.69301	-0.237421	0.07755	0.972263	no	2.24016	1.11987	-1.00026	5e-05	0.00120857	yes
TNFAIP8	chr5:118604417-118730294	17.9163	15.704	-0.190133	0.26435	0.999863	no	16.1247	15.5759	-0.0499649	0.6878	0.999462	no	20.9477	13.8619	-0.595662	0.00125	0.0184281	yes
PHF15	chr5:133861797-133918918	9.69992	8.71421	-0.154603	0.33825	0.999863	no	9.24941	8.85871	-0.0622656	0.59285	0.999462	no	9.25252	6.16837	-0.584957	0.00045	0.00792336	yes
TIFAB	chr5:134784557-134788089	25.6808	25.2423	-0.024845	0.88235	0.999863	no	27.7774	27.7482	-0.00152031	0.98935	0.999462	no	31.3887	20.9543	-0.582997	0.00125	0.0184281	yes
TGFBI	chr5:135364583-135399507	97.8049	100.453	0.0385354	0.80215	0.999863	no	98.7873	103.139	0.0621898	0.57765	0.999462	no	110.335	70.2014	-0.652322	5e-05	0.00120857	yes
EGR1	chr5:137801180-137805004	36.7173	28.493	-0.365854	0.0285	0.999863	no	26.2954	27.6688	0.073449	0.5245	0.999462	no	31.9772	12.2038	-1.38972	5e-05	0.00120857	yes
HSPA9	chr5:137890570-137911318	107.263	106.343	-0.0124281	0.9351	0.999863	no	100.119	96.5307	-0.0526534	0.636	0.999462	no	95.6382	142.575	0.57606	0.0004	0.00720053	yes
TMEM173	chr5:138855112-138862343	294.953	279.573	-0.0772596	0.6201	0.999863	no	302.595	291.746	-0.052677	0.64255	0.999462	no	307.496	209.905	-0.55083	0.00045	0.00792336	yes
PFDN1	chr5:139624634-139682689	58.6145	68.2688	0.219969	0.16165	0.999863	no	58.2165	72.1276	0.309123	0.0074	0.226517	no	54.1572	83.6174	0.626649	5e-05	0.00120857	yes
SRA1	chr5:139929651-139937678	23.7909	27.5692	0.212648	0.21085	0.999863	no	26.5069	29.6237	0.160386	0.1915	0.999462	no	21.3292	50.4408	1.24176	5e-05	0.00120857	yes
APBB3	chr5:139937852-139944189	10.2149	12.6927	0.313323	0.0778	0.999863	no	10.7545	13.0174	0.275501	0.03045	0.582093	no	10.9338	26.5466	1.27973	5e-05	0.00120857	yes
SLC35A4	chr5:139944419-139948683	31.2595	34.6937	0.150381	0.34085	0.999863	no	31.479	34.8939	0.148588	0.1923	0.999462	no	27.9461	49.5302	0.825661	5e-05	0.00120857	yes
WDR55	chr5:140044383-140053171	22.8189	29.7978	0.384976	0.03005	0.999863	no	24.3103	30.1256	0.309425	0.01765	0.417402	no	22.5938	40.995	0.859523	5e-05	0.00120857	yes
ARAP3	chr5:141032967-141061800	1.4017	1.37191	-0.0309892	0.8808	0.999863	no	1.56741	1.44347	-0.118836	0.4025	0.999462	no	1.66435	1.07381	-0.632226	0.0043	0.0490645	yes
PCDH12	chr5:141324529-141338627	1.21812	1.36714	0.166496	0.4351	0.999863	no	1.16916	1.36535	0.2238	0.135	0.999462	no	1.00981	1.59646	0.660801	0.00355	0.0420498	yes
SPRY4	chr5:141689991-141704620	0.622784	1.09954	0.820097	0.0009	0.222663	no	0.596067	0.867679	0.541687	0.00135	0.0611913	no	0.514316	2.06422	2.00487	5e-05	0.00120857	yes
FAM105A	chr5:14581890-14616287	59.184	52.6453	-0.168904	0.2749	0.999863	no	55.6105	48.1435	-0.208017	0.0611	0.876174	no	53.8221	34.6979	-0.633349	5e-05	0.00120857	yes
ADRB2	chr5:148206155-148208197	2.5995	2.26684	-0.197553	0.40715	0.999863	no	2.97951	2.79596	-0.0917313	0.55005	0.999462	no	4.44869	1.90768	-1.22156	5e-05	0.00120857	yes
SLC36A1	chr5:150827162-150871940	9.94499	11.4495	0.203245	0.20605	0.999863	no	9.90974	12.0281	0.279488	0.0143	0.363724	no	8.94953	16.7059	0.900477	5e-05	0.00120857	yes
ADAM19	chr5:156904311-157002783	0.0902921	0.283197	1.64913	1	1	no	0.110507	0.27333	1.30651	1	1	no	0.113171	1.1946	3.39995	5e-05	0.00120857	yes
LCP2	chr5:169675087-169724822	42.2276	55.1134	0.384215	0.01465	0.999863	no	42.3597	52.9907	0.323048	0.00425	0.150635	no	43.8102	70.9789	0.696126	5e-05	0.00120857	yes
NOP16	chr5:175810939-175815763	35.51	34.2542	-0.051943	0.76235	0.999863	no	35.5579	33.1633	-0.100583	0.41685	0.999462	no	29.5429	43.8252	0.568947	0.00065	0.0108052	yes
HIGD2A	chr5:175815783-175816751	161.008	164.162	0.0279862	0.8616	0.999863	no	174.579	178.978	0.035908	0.7532	0.999462	no	149.023	241.498	0.696481	5e-05	0.00120857	yes
DBN1	chr5:176883613-176900694	13.003	14.7171	0.178646	0.28125	0.999863	no	14.1431	16.9992	0.265369	0.0254	0.522103	no	11.9827	22.893	0.933948	5e-05	0.00120857	yes
PDLIM7	chr5:176910394-176924602	65.5804	71.9058	0.132844	0.41975	0.999863	no	72.0923	79.2926	0.137341	0.24625	0.999462	no	60.7454	88.3083	0.539774	0.00105	0.0160683	yes
MAML1	chr5:179159850-179204287	17.5311	18.7105	0.0939255	0.5545	0.999863	no	17.2047	20.2165	0.232736	0.0412	0.700301	no	17.2667	24.2183	0.488108	0.0019	0.0259162	yes
NDUFS6	chr5:1801495-1816167	233.567	235.242	0.0103042	0.94825	0.999863	no	234.182	244.274	0.0608735	0.59155	0.999462	no	205.537	311.939	0.601868	0.0002	0.004127	yes
BTNL9	chr5:180467224-180488523	0.352107	0.285859	-0.30071	1	1	no	0.352302	0.377425	0.099376	0.6636	0.999462	no	0.193906	1.82116	3.23142	5e-05	0.00120857	yes
SDHA	chr5:218355-256814	47.7872	47.9009	0.00342923	0.9829	0.999863	no	48.0135	49.3101	0.0384441	0.73285	0.999462	no	46.9484	64.838	0.465764	0.00275	0.0342336	yes
AHRR	chr5:271735-438405	47.6152	49.209	0.0475004	0.8024	0.999863	no	56.2308	50.707	-0.149178	0.28475	0.999462	no	62.0522	38.2046	-0.699736	0.00105	0.0160683	yes
PDZD2	chr5:31799030-32111038	0.0998222	0.125846	0.334225	1	1	no	0.118713	0.157563	0.408451	1	1	no	0.101957	0.580196	2.50858	5e-05	0.00120857	yes
GOLPH3	chr5:32124823-32174425	71.9091	82.2083	0.19311	0.2112	0.999863	no	70.6524	88.48	0.324614	0.00345	0.129074	no	69.6295	108.434	0.63904	5e-05	0.00120857	yes
SPEF2	chr5:35617988-35814713	4.91472	4.85076	-0.0188999	0.91925	0.999863	no	5.1233	4.24368	-0.271758	0.0469	0.755421	no	5.40443	3.08747	-0.807716	5e-05	0.00120857	yes
UGT3A2	chr5:36035118-36067023	2.67092	2.61744	-0.0291841	0.89525	0.999863	no	1.89493	1.78487	-0.0863289	0.6242	0.999462	no	1.97877	0.672483	-1.55703	5e-05	0.00120857	yes
SLC9A3	chr5:473333-524549	4.08088	4.30785	0.0780891	0.6876	0.999863	no	4.87077	5.2597	0.110832	0.405	0.999462	no	6.14619	3.7873	-0.698522	0.0004	0.00720053	yes
EMB	chr5:49692030-49737234	188.854	164.502	-0.199165	0.2001	0.999863	no	166.089	158.838	-0.0644016	0.5648	0.999462	no	211.075	144.461	-0.547073	0.00085	0.0135534	yes
NLN	chr5:65018022-65125111	7.55187	8.17107	0.113691	0.48295	0.999863	no	6.7178	7.93455	0.240159	0.0382	0.667865	no	7.42375	10.4129	0.48815	0.003	0.0367769	yes
CD180	chr5:66478103-66492617	5.59968	5.66974	0.0179364	0.9245	0.999863	no	5.4609	4.25577	-0.359721	0.00855	0.252958	no	4.51145	2.72839	-0.725545	0.0006	0.0100596	yes
LOC100272216	chr5:68926979-68929028	2.07946	1.91803	-0.116582	0.6398	0.999863	no	1.96086	1.53415	-0.354046	0.0475	0.760692	no	2.68998	1.10759	-1.28018	5e-05	0.00120857	yes
LOC441081	chr5:69776869-69881549	9.4439	8.50249	-0.151497	0.4695	0.999863	no	10.3843	7.6574	-0.439472	0.0019	0.0809331	no	11.1208	5.2461	-1.08395	5e-05	0.00120857	yes
NAIP	chr5:70264309-70320941	22.8349	20.7144	-0.140606	0.36775	0.999863	no	21.7747	17.8172	-0.28938	0.01205	0.323975	no	25.0656	13.0777	-0.938597	5e-05	0.00120857	yes
IQGAP2	chr5:75699148-76003957	1.57088	1.47424	-0.0916023	0.6509	0.999863	no	1.45472	1.55022	0.0917329	0.53555	0.999462	no	1.63692	2.76544	0.756523	0.0001	0.00223912	yes
LHFPL2	chr5:77781037-77944648	2.66849	2.34927	-0.183811	0.33405	0.999863	no	2.31008	2.05363	-0.169764	0.2131	0.999462	no	1.7727	2.75927	0.638338	0.0014	0.020376	yes
THBS4	chr5:79331169-79379107	4.23343	3.70548	-0.192167	0.32335	0.999863	no	4.17284	3.64063	-0.196841	0.15095	0.999462	no	5.23558	3.00763	-0.799722	0.0001	0.00223912	yes
TMEM161B-AS1	chr5:87564698-87732491	13.5925	13.6008	0.000882193	0.99705	0.999863	no	14.6825	13.9561	-0.0731947	0.6322	0.999462	no	15.0769	22.7267	0.592051	0.00425	0.0486156	yes
RHOBTB3	chr5:95066849-95132071	1.87143	2.02969	0.117119	0.54205	0.999863	no	1.89671	2.35141	0.31003	0.02575	0.526238	no	2.36405	4.44002	0.909302	5e-05	0.00120857	yes
LNPEP	chr5:96271345-96365115	6.3085	5.81416	-0.117726	0.5033	0.999863	no	5.21073	5.35508	0.0394217	0.7565	0.999462	no	6.88463	4.67342	-0.5589	0.00165	0.0230814	yes
TNF	chr6_ssto_hap7:2874144-2876913	49.3459	50.5477	0.0347152	0.8272	0.999863	no	55.0448	42.3708	-0.377537	0.0012	0.0552782	no	35.2006	24.9802	-0.494815	0.00275	0.0342336	yes
DDAH2	chr6_ssto_hap7:3025633-3028856	75.5911	75.7717	0.00344204	0.9841	0.999863	no	81.6003	72.1336	-0.177903	0.1217	0.999462	no	73.1959	45.8469	-0.674937	5e-05	0.00120857	yes
RNF5P1	chr6_ssto_hap7:3493889-3496298	53.2847	55.0649	0.0474114	0.78075	0.999863	no	57.0749	63.8745	0.162382	0.1795	0.999462	no	51.3789	75.6426	0.558023	0.00125	0.0184281	yes
HLA-DRA	chr6_ssto_hap7:3754282-3759493	10.7458	9.76586	-0.13796	0.49035	0.999863	no	9.50343	8.46735	-0.166538	0.2371	0.999462	no	9.43069	5.04304	-0.903069	5e-05	0.00120857	yes
SIM1	chr6:100836749-100911551	0.387652	0.266961	-0.538133	0.1164	0.999863	no	0.333326	0.225312	-0.565011	1	1	no	0.554442	0.194746	-1.50944	0.0006	0.0100596	yes
QRSL1	chr6:107077440-107116292	9.98965	9.84975	-0.0203469	0.9014	0.999863	no	9.85064	9.55378	-0.0441459	0.7105	0.999462	no	9.19954	13.3366	0.535759	0.00155	0.0220432	yes
TMEM170B	chr6:11538459-11583757	9.72352	8.60148	-0.176895	0.2651	0.999863	no	9.57901	8.18059	-0.227673	0.0481	0.765163	no	11.1048	7.82183	-0.505601	0.00205	0.027362	yes
PKIB	chr6:122793061-123047518	42.0202	37.1803	-0.176545	0.27995	0.999863	no	41.3659	33.0894	-0.322076	0.00615	0.198117	no	42.7724	25.8176	-0.728323	5e-05	0.00120857	yes
MYB	chr6:135502452-135540311	125.113	101.541	-0.301166	0.05495	0.999863	no	117.824	104.579	-0.172038	0.12455	0.999462	no	135.219	96.4757	-0.487056	0.00195	0.0262578	yes
TXLNB	chr6:139561198-139613208	0.648087	0.533209	-0.281485	0.28845	0.999863	no	0.513868	0.45226	-0.184245	0.3292	0.999462	no	0.688738	0.321735	-1.09808	0.00125	0.0184281	yes
CITED2	chr6:139693391-139695787	271.826	214.819	-0.339557	0.0287	0.999863	no	266.35	229.507	-0.214786	0.05565	0.8273	no	262.405	154.146	-0.767495	5e-05	0.00120857	yes
HIVEP2	chr6:143072603-143266338	3.51193	4.62209	0.396281	0.0171	0.999863	no	3.84201	4.33277	0.17343	0.1511	0.999462	no	3.34344	5.55625	0.732776	0.0001	0.00223912	yes
AIG1	chr6:143382022-143661441	69.4467	73.2747	0.0774101	0.62705	0.999863	no	70.3487	85.7754	0.286041	0.01175	0.319555	no	72.7179	167.408	1.20298	5e-05	0.00120857	yes
STX11	chr6:144471653-144513076	1.97624	2.385	0.271229	0.1658	0.999863	no	1.85354	2.42973	0.39051	0.005	0.169163	no	1.75078	3.05209	0.8018	0.0001	0.00223912	yes
ZC3H12D	chr6:149768765-149806148	4.85056	5.00359	0.0448115	0.79815	0.999863	no	5.48324	5.2938	-0.0507248	0.6764	0.999462	no	5.90121	3.9433	-0.581608	0.00105	0.0160683	yes
JARID2	chr6:15246205-15522273	9.86375	9.52143	-0.0509579	0.7533	0.999863	no	10.507	9.79884	-0.100663	0.394	0.999462	no	11.4736	7.80586	-0.555682	0.001	0.0155113	yes
CNKSR3	chr6:154726432-154831753	1.33985	1.31259	-0.0296572	0.9059	0.999863	no	1.42014	1.30969	-0.116808	0.47825	0.999462	no	1.40689	0.789504	-0.833488	0.00275	0.0342336	yes
TAGAP	chr6:159456026-159466184	9.35106	7.62197	-0.294965	0.09315	0.999863	no	8.55988	7.07394	-0.275076	0.0294	0.571905	no	8.05442	5.53297	-0.541727	0.0037	0.0434504	yes
GMPR	chr6:16238810-16295780	0.38282	0.743373	0.957421	0.02215	0.999863	no	0.477953	0.789892	0.724787	0.00705	0.220578	no	0.421431	4.02593	3.25595	5e-05	0.00120857	yes
ATXN1	chr6:16299342-16761721	1.64252	1.40081	-0.229653	0.2074	0.999863	no	1.56542	1.4845	-0.0765804	0.55605	0.999462	no	1.86326	1.2023	-0.632042	0.00105	0.0160683	yes
SFT2D1	chr6:166733516-166755991	245.142	287.69	0.230897	0.1356	0.999863	no	241.967	310.261	0.35867	0.0013	0.0594971	no	246.869	401.001	0.699863	5e-05	0.00120857	yes
MPC1	chr6:166778407-166796501	60.3105	60.9125	0.0143303	0.9307	0.999863	no	63.4134	65.8366	0.0541025	0.6411	0.999462	no	54.6732	106.439	0.961125	5e-05	0.00120857	yes
DLL1	chr6:170591293-170599697	4.56108	4.22835	-0.109283	0.56115	0.999863	no	4.90461	4.27986	-0.196573	0.13815	0.999462	no	5.96527	2.02492	-1.55872	5e-05	0.00120857	yes
CAP2	chr6:17393735-17558023	2.47608	2.17557	-0.186667	0.38065	0.999863	no	2.19012	1.65466	-0.404474	0.00925	0.268611	no	1.71468	0.877533	-0.96641	0.00055	0.00937055	yes
MRS2	chr6:24403152-24425816	5.81347	5.5738	-0.0607389	0.7348	0.999863	no	5.73138	5.93017	0.0491924	0.7063	0.999462	no	5.6179	8.17699	0.541537	0.00235	0.0306778	yes
ZKSCAN8	chr6:28109715-28125236	2.75261	2.85977	0.0551002	0.7709	0.999863	no	2.70381	2.79398	0.0473238	0.72485	0.999462	no	3.54088	2.36574	-0.581815	0.00265	0.0334761	yes
SERPINB1	chr6:2832565-2842283	27.8668	27.2387	-0.0328932	0.8369	0.999863	no	27.1691	28.623	0.075208	0.51525	0.999462	no	26.1225	37.56	0.523903	0.001	0.0155113	yes
SERPINB6	chr6:2948392-2972399	20.4878	21.1279	0.0443791	0.7986	0.999863	no	21.608	22.6998	0.071113	0.5657	0.999462	no	19.5575	30.2576	0.629576	0.0003	0.00576447	yes
SLC22A23	chr6:3269206-3456793	0.198791	0.236958	0.25338	1	1	no	0.248963	0.251392	0.0140118	1	1	no	0.219464	0.699195	1.67171	5e-05	0.00120857	yes
BAK1	chr6:33540322-33548070	30.0367	29.2278	-0.0393875	0.8036	0.999863	no	30.6686	31.5165	0.0393482	0.7335	0.999462	no	25.3108	41.3723	0.708913	5e-05	0.00120857	yes
MAPK13	chr6:36098260-36112301	1.34345	1.6186	0.268806	0.17455	0.999863	no	1.41895	1.81791	0.357452	0.0105	0.296389	no	1.34924	3.44045	1.35045	5e-05	0.00120857	yes
BRPF3	chr6:36164549-36200567	9.35355	9.7752	0.0636134	0.6959	0.999863	no	8.62828	10.16	0.235758	0.0443	0.729325	no	8.20853	13.146	0.679428	5e-05	0.00120857	yes
PNPLA1	chr6:36210944-36276372	1.41826	1.76768	0.317739	0.19295	0.999863	no	1.45858	1.80803	0.309857	0.0639	0.892077	no	1.46696	4.35648	1.57034	5e-05	0.00120857	yes
KCNK5	chr6:39156746-39197251	5.93579	6.57999	0.148647	0.3959	0.999863	no	5.82987	7.20256	0.305047	0.01695	0.406973	no	5.4358	12.1218	1.15703	5e-05	0.00120857	yes
TFEB	chr6:41651715-41703997	11.3264	13.5258	0.256024	0.1388	0.999863	no	12.7292	14.492	0.18711	0.13395	0.999462	no	10.7884	24.8498	1.20375	5e-05	0.00120857	yes
MRPL2	chr6:43021766-43027242	27.2885	27.2699	-0.000983974	0.994	0.999863	no	28.037	29.1037	0.0538702	0.65835	0.999462	no	25.904	37.967	0.55157	0.0019	0.0259162	yes
SLC29A1	chr6:44187241-44201888	52.784	55.0641	0.061013	0.69895	0.999863	no	57.4278	60.1097	0.0658477	0.5679	0.999462	no	55.6294	77.2739	0.474133	0.00355	0.0420498	yes
F13A1	chr6:6144310-6320924	12.4734	11.9737	-0.0589865	0.7194	0.999863	no	10.7492	10.751	0.000236892	0.99845	0.999462	no	14.3109	5.97138	-1.26097	5e-05	0.00120857	yes
RREB1	chr6:7107829-7252213	14.092	12.41	-0.18338	0.2409	0.999863	no	14.6453	12.4637	-0.232705	0.0409	0.699405	no	15.93	9.94372	-0.679887	5e-05	0.00120857	yes
FAM135A	chr6:71123106-71270877	2.52158	2.67781	0.0867238	0.64385	0.999863	no	2.37738	2.39117	0.008342	0.9529	0.999462	no	2.61179	4.06321	0.637581	0.00045	0.00792336	yes
KCNQ5	chr6:73331570-73908573	3.10816	3.1959	0.0401596	0.8241	0.999863	no	3.02023	2.80802	-0.105105	0.41175	0.999462	no	3.39683	2.27962	-0.575392	0.00195	0.0262578	yes
CD109	chr6:74405507-74538041	5.81523	5.56926	-0.0623527	0.7076	0.999863	no	5.61895	4.82564	-0.21958	0.06805	0.914677	no	6.48142	3.85111	-0.751038	5e-05	0.00120857	yes
ZNF292	chr6:87865268-87973406	14.2718	13.668	-0.0623693	0.68305	0.999863	no	15.5841	14.2439	-0.129733	0.25175	0.999462	no	21.2174	14.9028	-0.509668	0.0015	0.0214212	yes
CNR1	chr6:88849584-88875767	0.96315	0.822421	-0.227885	0.3307	0.999863	no	0.726806	0.710709	-0.0323114	0.8489	0.999462	no	1.174	0.547847	-1.09959	5e-05	0.00120857	yes
NDUFAF4	chr6:97337186-97345767	9.20001	9.65463	0.0695855	0.6918	0.999863	no	8.71506	8.66512	-0.00829102	0.95025	0.999462	no	7.74468	15.6974	1.01925	5e-05	0.00120857	yes
RASA4	chr7:102220092-102257205	13.5417	13.3366	-0.0220195	0.89065	0.999863	no	14.8624	13.9759	-0.0887244	0.44265	0.999462	no	16.0264	11.2144	-0.515103	0.00145	0.0208377	yes
GPER	chr7:1036622-1177893	0.595705	2.34048	1.97414	0.22665	0.999863	no	0.742589	4.05581	2.44935	0.0097	0.278816	no	0.961422	7.58618	2.98013	0.00265	0.0334761	yes
NDUFA4	chr7:10971579-10979813	52.9578	53.9675	0.0272466	0.86375	0.999863	no	53.1779	51.6236	-0.0427961	0.701	0.999462	no	49.8771	70.0828	0.490681	0.0017	0.023564	yes
GPR85	chr7:112720467-112727833	3.79932	2.92959	-0.375043	0.0433	0.999863	no	3.2106	2.54073	-0.337599	0.01165	0.318058	no	3.60186	1.96222	-0.876253	5e-05	0.00120857	yes
THSD7A	chr7:11410061-11871824	15.7315	14.1625	-0.151579	0.32995	0.999863	no	15.3408	13.6757	-0.165755	0.14375	0.999462	no	17.5638	11.5073	-0.61006	0.0002	0.004127	yes
TFEC	chr7:115575201-115670867	11.5974	10.3925	-0.158258	0.32275	0.999863	no	10.327	9.40032	-0.135639	0.2442	0.999462	no	12.3448	7.81809	-0.659014	5e-05	0.00120857	yes
ARL4A	chr7:12726451-12730558	6.23305	5.22809	-0.253656	0.16945	0.999863	no	6.16063	4.9648	-0.311344	0.01905	0.439922	no	5.78593	3.6709	-0.656413	0.0011	0.0167398	yes
LOC100130705	chr7:128506463-128512101	1.18451	1.27677	0.108202	0.64195	0.999863	no	1.48059	1.64812	0.154648	0.30835	0.999462	no	1.55695	2.66259	0.774107	0.00035	0.00647074	yes
KCP	chr7:128516918-128550773	4.02017	4.1445	0.0439405	0.82115	0.999863	no	4.60487	5.73338	0.316227	0.02095	0.465841	no	4.75509	7.16801	0.592099	0.00235	0.0306778	yes
WDR91	chr7:134868589-134896316	21.1028	18.8736	-0.161063	0.3016	0.999863	no	22.7301	17.944	-0.341102	0.0025	0.0993118	no	22.904	15.5659	-0.557215	0.001	0.0155113	yes
HIPK2	chr7:139246315-139477693	2.07354	2.29519	0.146518	0.38475	0.999863	no	1.98267	2.03198	0.0354409	0.7697	0.999462	no	2.03433	3.08698	0.601645	0.00065	0.0108052	yes
ETV1	chr7:13930855-14031050	0.643096	0.623292	-0.0451265	0.84595	0.999863	no	0.687992	0.530465	-0.375134	0.0229	0.489942	no	0.882479	0.307623	-1.5204	5e-05	0.00120857	yes
CLEC5A	chr7:141627156-141646783	0.707232	0.852178	0.268972	0.3197	0.999863	no	0.792488	0.570304	-0.474657	0.01275	0.335774	no	0.520984	1.15837	1.15278	0.00035	0.00647074	yes
MICALL2	chr7:1473994-1499109	12.9912	12.6578	-0.0375094	0.8211	0.999863	no	14.25	14.2983	0.00488113	0.9678	0.999462	no	14.587	9.20357	-0.664416	0.00015	0.00324194	yes
C7orf29	chr7:149944300-150035245	0.454324	0.719348	0.662968	0.05125	0.999863	no	0.631278	0.898152	0.508684	0.01495	0.376197	no	0.615309	1.68467	1.45308	0.0001	0.00223912	yes
REPIN1	chr7:150065878-150071133	24.3209	26.2432	0.109743	0.49615	0.999863	no	24.4141	30.9624	0.342798	0.00275	0.107136	no	23.9954	45.4306	0.920908	5e-05	0.00120857	yes
ZNF775	chr7:150076405-150095719	3.6225	3.61843	-0.00162043	0.99315	0.999863	no	3.50746	4.78804	0.449008	0.00205	0.0857725	no	3.12342	5.86557	0.909144	5e-05	0.00120857	yes
LOC285972	chr7:150130741-150145228	6.52142	7.02205	0.106705	0.58335	0.999863	no	7.22859	7.27824	0.00987513	0.94	0.999462	no	7.65385	5.07865	-0.591739	0.00285	0.0352221	yes
TMEM176B	chr7:150488375-150502208	25.9483	25.7134	-0.0131198	0.94185	0.999863	no	24.7942	28.385	0.195126	0.13525	0.999462	no	28.4829	49.3796	0.793819	5e-05	0.00120857	yes
EN2	chr7:155250823-155257526	0.421597	0.52546	0.317715	0.304	0.999863	no	0.366475	0.377955	0.0444973	0.8404	0.999462	no	0.221298	0.561719	1.34386	0.002	0.0267992	yes
PTPRN2	chr7:157331749-158380482	8.66523	8.59265	-0.0121347	0.94345	0.999863	no	8.7241	8.33763	-0.0653702	0.5931	0.999462	no	9.40026	6.08654	-0.62708	0.0005	0.0086261	yes
ESYT2	chr7:158523688-158622319	49.8115	48.8993	-0.0266652	0.8602	0.999863	no	48.1883	45.6695	-0.0774524	0.4905	0.999462	no	54.6599	38.9152	-0.490149	0.00195	0.0262578	yes
AHR	chr7:17338275-17385775	1.77974	1.66104	-0.0995797	0.6155	0.999863	no	1.56791	1.25347	-0.322916	0.0244	0.50878	no	1.45225	0.828902	-0.809011	0.0005	0.0086261	yes
TWIST1	chr7:19155090-19157295	32.8648	28.4394	-0.208654	0.2086	0.999863	no	37.0285	30.6975	-0.270517	0.0245	0.50878	no	30.9186	21.2673	-0.539838	0.0017	0.023564	yes
CHST12	chr7:2443194-2474216	12.8638	11.6273	-0.145799	0.40125	0.999863	no	13.4342	12.1344	-0.146806	0.2407	0.999462	no	11.8347	6.38003	-0.89139	5e-05	0.00120857	yes
CYCS	chr7:25158269-25164980	36.0176	34.5829	-0.0586428	0.7062	0.999863	no	32.9656	30.4003	-0.116877	0.29815	0.999462	no	32.6556	58.367	0.837821	5e-05	0.00120857	yes
LFNG	chr7:2552162-2568810	5.64817	7.87162	0.478877	0.0096	0.999863	no	6.10304	7.96253	0.383701	0.0053	0.176359	no	4.62298	10.6849	1.20868	5e-05	0.00120857	yes
CHN2	chr7:29234120-29553944	0.554577	0.469112	-0.241456	0.4256	0.999863	no	0.440233	0.55559	0.335753	0.1031	0.999462	no	0.469713	1.19252	1.34416	0.0001	0.00223912	yes
AOAH	chr7:36552548-36764154	6.72457	6.51632	-0.0453847	0.8132	0.999863	no	6.18391	6.98904	0.176575	0.18375	0.999462	no	7.48857	11.1914	0.579629	0.0015	0.0214212	yes
TARP	chr7:38299243-38313248	50.4061	44.5624	-0.177773	0.28355	0.999863	no	55.3302	42.1303	-0.393211	0.00125	0.0573945	no	46.477	20.965	-1.14853	5e-05	0.00120857	yes
RALA	chr7:39663151-39747723	15.3543	17.7227	0.206957	0.20635	0.999863	no	14.8018	18.6539	0.333706	0.00475	0.165454	no	13.4841	19.3328	0.519792	0.00255	0.0325738	yes
LINC00265	chr7:39773166-39834222	3.5097	4.43701	0.338241	0.0602	0.999863	no	4.12885	5.07727	0.298312	0.01985	0.452043	no	3.58361	5.67705	0.663725	0.0003	0.00576447	yes
RASA4CP	chr7:44068485-44083895	1.29364	1.51104	0.224109	0.557	0.999863	no	1.39882	1.61689	0.209013	0.4251	0.999462	no	1.39172	3.18144	1.19281	0.0009	0.014251	yes
DBNL	chr7:44084238-44101315	76.4611	82.5076	0.109802	0.48455	0.999863	no	77.6313	92.2279	0.248565	0.028	0.554588	no	72.4041	137.881	0.929283	5e-05	0.00120857	yes
PGAM2	chr7:44102325-44105186	9.07796	11.6486	0.359713	0.08695	0.999863	no	10.803	14.2399	0.398508	0.0048	0.165565	no	11.1602	37.473	1.74749	5e-05	0.00120857	yes
OGDH	chr7:44646120-44748669	25.7038	25.3196	-0.0217257	0.89335	0.999863	no	23.5902	24.7612	0.069893	0.55365	0.999462	no	21.8061	34.2539	0.651539	0.0001	0.00223912	yes
TBRG4	chr7:45139698-45151346	33.1838	33.0339	-0.00653296	0.96725	0.999863	no	34.6476	35.1084	0.0190618	0.8667	0.999462	no	32.4746	45.0975	0.473733	0.0044	0.049997	yes
ADCY1	chr7:45614124-45762714	2.52066	2.64104	0.067304	0.69695	0.999863	no	2.43196	2.83053	0.218952	0.07565	0.962724	no	2.29748	3.74812	0.706117	5e-05	0.00120857	yes
SLC29A4	chr7:5322560-5343704	3.00034	2.89678	-0.050676	0.7987	0.999863	no	2.84401	3.41743	0.264984	0.06355	0.890345	no	2.84271	5.50509	0.953499	5e-05	0.00120857	yes
PDGFA	chr7:536896-559481	2.27509	3.61008	0.666107	0.0015	0.330516	no	3.08736	3.12374	0.0168974	0.9084	0.999462	no	1.6697	3.95441	1.24387	5e-05	0.00120857	yes
FLJ44511	chr7:560027-564869	0.291973	0.606288	1.05417	0.00215	0.427032	no	0.505348	0.692872	0.455312	0.0161	0.396666	no	0.38375	1.03246	1.42785	0.0002	0.004127	yes
FSCN1	chr7:5632435-5646287	89.1572	80.1279	-0.154047	0.32015	0.999863	no	93.2407	87.5837	-0.0902978	0.411	0.999462	no	87.3371	58.984	-0.566272	0.00045	0.00792336	yes
KCTD7	chr7:66093867-66108216	2.76439	3.11879	0.174022	0.37115	0.999863	no	2.83697	2.83262	-0.00221403	0.98935	0.999462	no	3.32119	2.09378	-0.665593	0.00125	0.0184281	yes
MLXIPL	chr7:73007523-73038870	1.00853	1.10139	0.12708	0.6039	0.999863	no	1.27852	1.46387	0.195317	0.22065	0.999462	no	1.26164	2.05179	0.701582	0.0031	0.0377996	yes
STX1A	chr7:73113534-73134017	1.95425	1.92329	-0.0230388	0.9224	0.999863	no	2.32593	1.93208	-0.267657	0.10305	0.999462	no	1.59467	0.811472	-0.974648	0.00165	0.0230814	yes
LIMK1	chr7:73498106-73536855	15.8491	15.6832	-0.0151858	0.92755	0.999863	no	14.8905	16.7585	0.170507	0.154	0.999462	no	13.9508	23.1417	0.730151	5e-05	0.00120857	yes
LAT2	chr7:73624086-73644164	148.034	166.349	0.168287	0.27445	0.999863	no	158.369	177.741	0.166486	0.1334	0.999462	no	145.674	217.813	0.580348	0.00035	0.00647074	yes
CLIP2	chr7:73703804-73820273	5.28502	5.78424	0.130218	0.44775	0.999863	no	5.06267	6.16381	0.283923	0.0192	0.441506	no	4.6493	7.74954	0.737098	0.0001	0.00223912	yes
MDH2	chr7:75677392-75695930	192.344	189.601	-0.0207211	0.89455	0.999863	no	195.123	197.878	0.0202299	0.8573	0.999462	no	177.421	272.318	0.618114	0.0001	0.00223912	yes
SRRM3	chr7:75831215-75916605	0.500686	0.636704	0.346718	0.22485	0.999863	no	0.546629	0.792511	0.535868	0.0048	0.165565	no	0.527736	1.54828	1.55278	5e-05	0.00120857	yes
FGL2	chr7:76751933-76924521	3.77024	3.25471	-0.212125	0.2809	0.999863	no	3.22789	2.55269	-0.338574	0.01995	0.45359	no	3.58264	0.998817	-1.84273	5e-05	0.00120857	yes
GNAI1	chr7:79764139-79848725	1.73811	1.81644	0.0635877	0.773	0.999863	no	1.74213	1.58967	-0.132124	0.3972	0.999462	no	1.74858	0.835771	-1.06501	0.0001	0.00223912	yes
CD36	chr7:80231503-80308593	16.1777	13.6597	-0.244084	0.2112	0.999863	no	13.3581	10.0274	-0.41377	0.00375	0.138105	no	14.5275	6.24212	-1.21868	5e-05	0.00120857	yes
PCLO	chr7:82383320-82792197	0.497565	0.513143	0.0444766	0.8244	0.999863	no	0.46988	0.424416	-0.146813	0.3177	0.999462	no	0.574373	0.294866	-0.961928	0.0001	0.00223912	yes
KIAA1324L	chr7:86506222-86689014	1.79562	1.95128	0.119942	0.53075	0.999863	no	1.82028	2.2186	0.285492	0.0369	0.654755	no	1.91772	3.84056	1.00193	5e-05	0.00120857	yes
CDK6	chr7:92234234-92465941	34.2783	30.3848	-0.173944	0.2459	0.999863	no	32.0916	25.619	-0.324982	0.0037	0.137337	no	33.3243	19.6556	-0.761632	5e-05	0.00120857	yes
PDK4	chr7:95212808-95225925	0.763059	0.58106	-0.393108	0.15445	0.999863	no	0.751034	0.683818	-0.135265	0.4573	0.999462	no	0.848637	0.43179	-0.97482	0.0033	0.0395335	yes
LMTK2	chr7:97736196-97838944	1.78349	1.8192	0.0285992	0.87445	0.999863	no	1.58324	1.74842	0.143171	0.2813	0.999462	no	1.39378	2.22952	0.677729	0.00055	0.00937055	yes
NPTX2	chr7:98246596-98259181	3.81515	3.44221	-0.148405	0.4563	0.999863	no	3.3574	3.24968	-0.0470447	0.734	0.999462	no	3.47629	1.73116	-1.00581	5e-05	0.00120857	yes
LRP12	chr8:105501458-105601252	4.02647	5.18695	0.365372	0.0434	0.999863	no	3.85227	4.83551	0.32796	0.0126	0.333688	no	3.51733	6.56962	0.901327	5e-05	0.00120857	yes
PINX1	chr8:10622883-10697299	10.1768	11.123	0.128263	0.52045	0.999863	no	9.49124	10.2235	0.107216	0.45275	0.999462	no	8.9646	14.7846	0.721782	0.00055	0.00937055	yes
CTSB	chr8:11700033-11725646	44.6403	47.2941	0.0833126	0.59405	0.999863	no	45.4173	46.3954	0.0307392	0.7828	0.999462	no	40.8693	75.9815	0.894631	5e-05	0.00120857	yes
EXT1	chr8:118811601-119124058	0.833376	0.970671	0.220015	0.4011	0.999863	no	0.833617	0.873379	0.067222	0.71005	0.999462	no	0.759405	2.48815	1.71213	5e-05	0.00120857	yes
DEPTOR	chr8:120885899-121063157	4.5155	4.17922	-0.111649	0.5674	0.999863	no	3.91461	3.70054	-0.0811337	0.5643	0.999462	no	4.78961	1.87572	-1.35246	5e-05	0.00120857	yes
NDUFB9	chr8:125551342-125562227	227.304	233.525	0.0389582	0.80355	0.999863	no	236.979	232.657	-0.0265551	0.8132	0.999462	no	212.374	301.305	0.504615	0.00145	0.0208377	yes
TRIB1	chr8:126442562-126450644	2.54125	2.67402	0.0734754	0.71255	0.999863	no	3.05404	2.28124	-0.420902	0.00275	0.107136	no	2.56046	1.46742	-0.803123	0.00025	0.00496408	yes
KCNQ3	chr8:133133104-133493004	2.19266	2.22328	0.0200114	0.9102	0.999863	no	1.97192	2.22566	0.174635	0.16975	0.999462	no	3.02455	2.1006	-0.525917	0.00275	0.0342336	yes
ST3GAL1	chr8:134467090-134584183	12.0417	15.2514	0.340897	0.03065	0.999863	no	12.727	15.9028	0.321386	0.0048	0.165565	no	13.5087	26.4957	0.971869	5e-05	0.00120857	yes
ZFAT	chr8:135490030-135725292	3.77354	3.68885	-0.0327488	0.86225	0.999863	no	3.38337	3.98865	0.237442	0.07595	0.963075	no	3.14745	5.32892	0.759661	0.0002	0.004127	yes
KHDRBS3	chr8:136469715-136659848	0.112686	0.14237	0.337337	1	1	no	0.126873	0.21963	0.791693	1	1	no	0.0864372	1.13764	3.71825	0.0041	0.0470966	yes
PTK2	chr8:141668480-142011412	4.30321	4.24922	-0.0182175	0.92105	0.999863	no	4.07572	4.78656	0.231936	0.07655	0.967212	no	3.99855	7.98716	0.998205	5e-05	0.00120857	yes
SLC45A4	chr8:142220869-142238673	7.81577	8.39465	0.103082	0.5476	0.999863	no	7.55504	9.30478	0.300533	0.0165	0.401623	no	7.31834	11.6101	0.665794	0.00035	0.00647074	yes
PTP4A3	chr8:142432006-142441620	30.3385	27.6109	-0.135914	0.41395	0.999863	no	34.193	34.608	0.0174037	0.8889	0.999462	no	35.0363	23.4401	-0.579877	0.0007	0.0114966	yes
ARC	chr8:143692404-143695833	0.582855	0.506187	-0.203467	0.50595	0.999863	no	0.537526	0.476704	-0.17324	0.4136	0.999462	no	0.639484	0.211114	-1.59889	0.00075	0.0122152	yes
RHPN1	chr8:144451024-144466390	5.90384	5.92172	0.0043628	0.97835	0.999863	no	6.86052	6.92974	0.014483	0.9073	0.999462	no	7.0139	4.63005	-0.599189	0.00185	0.0253606	yes
NRBP2	chr8:144915754-144923146	15.5593	15.5133	-0.00426877	0.97665	0.999863	no	17.3805	16.8347	-0.0460323	0.68895	0.999462	no	18.819	11.0894	-0.763008	0.0001	0.00223912	yes
PLEC	chr8:144989320-145050913	25.8324	25.1785	-0.0369895	0.81005	0.999863	no	28.1873	24.0778	-0.227344	0.04555	0.740423	no	22.3213	15.4058	-0.534946	0.00055	0.00937055	yes
CYC1	chr8:145149959-145152428	188.962	184.085	-0.0377259	0.80905	0.999863	no	191.234	201.742	0.07717	0.49145	0.999462	no	172.733	290.813	0.751546	5e-05	0.00120857	yes
PDGFRL	chr8:17433941-17500642	0.213176	0.351777	0.722612	1	1	no	0.171	0.363495	1.08794	0.0136	0.349693	no	0.284357	1.63781	2.52599	5e-05	0.00120857	yes
PSD3	chr8:18384812-18871196	3.63856	3.55575	-0.0332104	0.8442	0.999863	no	3.34319	3.32323	-0.00863713	0.94485	0.999462	no	4.81852	2.63737	-0.869493	5e-05	0.00120857	yes
LOXL2	chr8:23154409-23261722	0.480874	0.529899	0.140059	0.66065	0.999863	no	0.493473	0.611188	0.308645	0.15775	0.999462	no	0.607553	1.13607	0.902968	0.00195	0.0262578	yes
DPYSL2	chr8:26371708-26515693	29.971	28.8895	-0.0530199	0.73425	0.999863	no	34.1189	27.3284	-0.320172	0.00485	0.166074	no	35.2781	20.4063	-0.789757	5e-05	0.00120857	yes
TRIM35	chr8:27142403-27168834	12.3986	13.6113	0.134625	0.4108	0.999863	no	11.7426	14.777	0.331596	0.0043	0.152026	no	10.9228	22.6381	1.05141	5e-05	0.00120857	yes
ZNF395	chr8:28203101-28243977	8.99103	9.1099	0.0189488	0.90585	0.999863	no	14.1902	13.6225	-0.0589063	0.62085	0.999462	no	26.4607	13.2656	-0.996164	5e-05	0.00120857	yes
EXTL3	chr8:28558989-28611207	7.65516	8.54323	0.158348	0.4295	0.999863	no	8.35994	9.16012	0.131874	0.4426	0.999462	no	6.38392	10.8819	0.769418	0.0001	0.00223912	yes
GSR	chr8:30535579-30585486	25.4811	27.257	0.0971963	0.5459	0.999863	no	25.3717	25.9703	0.0336429	0.76815	0.999462	no	22.8208	31.9794	0.486792	0.0021	0.0278662	yes
RAB11FIP1	chr8:37716464-37757015	16.9335	21.3383	0.333564	0.03175	0.999863	no	16.4762	21.327	0.372294	0.0012	0.0552782	no	17.4069	28.5558	0.714125	5e-05	0.00120857	yes
FGFR1	chr8:38268655-38326352	9.38566	9.8028	0.062736	0.7018	0.999863	no	9.5108	10.0959	0.0861257	0.4716	0.999462	no	8.63164	12.2133	0.500747	0.0025	0.0321452	yes
CEBPD	chr8:48649475-48650726	107.451	86.3084	-0.316105	0.0478	0.999863	no	101.55	117.823	0.214432	0.05865	0.855081	no	111.573	76.9974	-0.535102	0.0011	0.0167398	yes
MRPL15	chr8:55047780-55061074	30.7182	30.4557	-0.0123806	0.93855	0.999863	no	29.9341	29.2279	-0.0344438	0.7683	0.999462	no	27.8039	42.3235	0.606173	0.00015	0.00324194	yes
DEFB1	chr8:6728096-6735529	33.2945	31.1781	-0.0947528	0.6424	0.999863	no	34.3234	30.7441	-0.158884	0.2628	0.999462	no	32.635	15.1763	-1.1046	5e-05	0.00120857	yes
PAG1	chr8:81880045-82024303	5.12632	4.56131	-0.168475	0.2971	0.999863	no	4.77552	3.96354	-0.268868	0.0239	0.50222	no	5.99125	4.04298	-0.567439	0.0007	0.0114966	yes
PDP1	chr8:94929082-94938296	6.212	5.8151	-0.0952545	0.58685	0.999863	no	6.06604	5.27209	-0.202378	0.1084	0.999462	no	6.38967	4.11156	-0.636053	0.00035	0.00647074	yes
TP53INP1	chr8:95938199-95961615	2.20906	2.20771	-0.00088309	0.995	0.999863	no	2.07445	1.98397	-0.0643376	0.644	0.999462	no	3.05075	1.42581	-1.09738	5e-05	0.00120857	yes
SDC2	chr8:97505881-97624037	21.3604	20.6939	-0.0457328	0.77745	0.999863	no	19.2895	18.2658	-0.0786764	0.49475	0.999462	no	23.1541	15.2919	-0.598501	0.00035	0.00647074	yes
TDRD7	chr9:100174301-100258405	72.3851	63.0342	-0.199557	0.1916	0.999863	no	65.1335	55.251	-0.237397	0.0332	0.616161	no	68.3505	40.4945	-0.755225	5e-05	0.00120857	yes
TBC1D2	chr9:100961279-101018003	1.88209	2.36	0.326453	0.14315	0.999863	no	2.22146	2.78116	0.32418	0.0479	0.763636	no	1.82287	4.22868	1.21399	5e-05	0.00120857	yes
TGFBR1	chr9:101867411-101916473	22.315	19.9354	-0.162681	0.2983	0.999863	no	22.4494	18.155	-0.30631	0.0074	0.226517	no	24.7641	18.0886	-0.453168	0.0038	0.0443582	yes
DMRT2	chr9:1050345-1057554	3.89417	3.84057	-0.0199931	0.92235	0.999863	no	3.76002	4.20337	0.160805	0.27185	0.999462	no	3.75496	6.3627	0.760843	0.00025	0.00496408	yes
IKBKAP	chr9:111629799-111696608	11.0999	10.9824	-0.0153594	0.92525	0.999863	no	10.1695	9.7199	-0.0652396	0.57445	0.999462	no	14.4629	10.1336	-0.513212	0.0021	0.0278662	yes
SNX30	chr9:115513133-115637267	4.17436	4.33951	0.0559767	0.74385	0.999863	no	4.38468	3.8297	-0.195239	0.1155	0.999462	no	4.37468	2.87453	-0.605851	0.0008	0.0129218	yes
SLC31A1	chr9:115983807-116026772	6.47997	7.34048	0.179888	0.2869	0.999863	no	6.46007	7.27985	0.172358	0.1575	0.999462	no	6.66722	15.7605	1.24116	5e-05	0.00120857	yes
BSPRY	chr9:116111811-116133513	6.34305	5.72721	-0.147345	0.4325	0.999863	no	6.57562	5.64444	-0.220296	0.09995	0.999462	no	7.03082	3.69254	-0.929081	5e-05	0.00120857	yes
ORM1	chr9:117085302-117088759	2.86353	3.06703	0.0990482	0.7279	0.999863	no	2.51223	3.52485	0.488595	0.01275	0.335774	no	2.90551	17.109	2.5579	5e-05	0.00120857	yes
DFNB31	chr9:117164359-117267736	0.429237	0.560519	0.384989	0.22245	0.999863	no	0.521388	0.448158	-0.21835	0.32465	0.999462	no	0.551042	0.230113	-1.25982	0.0039	0.0454093	yes
C5	chr9:123714613-123812554	9.92573	9.74587	-0.0263835	0.8718	0.999863	no	9.23828	9.0909	-0.0232018	0.84265	0.999462	no	11.1422	7.54665	-0.56212	0.00095	0.0148707	yes
CNTRL	chr9:123850573-123939886	28.1058	25.8425	-0.121125	0.42945	0.999863	no	25.9597	24.4013	-0.0893189	0.4218	0.999462	no	30.9285	20.5591	-0.589161	0.0004	0.00720053	yes
GSN	chr9:124030379-124095120	392.218	380.326	-0.0444186	0.77485	0.999863	no	418.243	394.08	-0.0858525	0.46235	0.999462	no	378.212	231.899	-0.705697	5e-05	0.00120857	yes
NDUFA8	chr9:124906337-124922098	49.1615	47.7597	-0.0417342	0.80985	0.999863	no	46.9807	50.1129	0.0931144	0.4476	0.999462	no	47.4345	70.2409	0.566375	0.00125	0.0184281	yes
PTGS1	chr9:125132808-125157982	15.0623	16.3486	0.118227	0.46285	0.999863	no	15.2313	16.73	0.135394	0.241	0.999462	no	15.2491	23.3814	0.616642	0.0001	0.00223912	yes
MVB12B	chr9:129089122-129269320	17.2046	16.0131	-0.103542	0.5198	0.999863	no	17.3736	16.9779	-0.0332452	0.77335	0.999462	no	17.931	12.5892	-0.510276	0.00205	0.027362	yes
PIP5KL1	chr9:130683807-130693076	3.54657	3.57267	0.010578	0.96435	0.999863	no	3.69334	4.34567	0.234654	0.17795	0.999462	no	2.98946	5.07961	0.764836	0.0025	0.0321452	yes
LOC100289019	chr9:130873449-130881013	2.27366	2.5682	0.175739	0.38185	0.999863	no	3.02785	2.83741	-0.0937182	0.5012	0.999462	no	2.74567	4.84543	0.819468	5e-05	0.00120857	yes
PTGES2	chr9:130882971-130890741	18.8384	17.8728	-0.0759083	0.681	0.999863	no	19.5153	18.3054	-0.09234	0.48855	0.999462	no	16.5425	26.7873	0.695368	0.0001	0.00223912	yes
CERCAM	chr9:131182758-131199630	27.4315	26.7305	-0.0373483	0.81895	0.999863	no	27.8707	27.8345	-0.00187402	0.98715	0.999462	no	31.3784	17.6461	-0.830422	5e-05	0.00120857	yes
FAM73B	chr9:131799252-131834351	6.88495	7.30655	0.0857443	0.61605	0.999863	no	7.81413	7.88693	0.0133796	0.9123	0.999462	no	6.763	9.64915	0.512737	0.0035	0.0415295	yes
CRAT	chr9:131857072-131873070	15.1347	15.6257	0.0460612	0.77885	0.999863	no	16.3389	18.1425	0.151067	0.20625	0.999462	no	14.254	20.843	0.548197	0.00085	0.0135534	yes
NTNG2	chr9:135037333-135118220	0.333382	0.31832	-0.0666997	1	1	no	0.390587	0.381141	-0.0353188	0.8679	0.999462	no	0.401315	0.994759	1.30961	0.00025	0.00496408	yes
CACFD1	chr9:136325086-136335909	3.96219	3.7466	-0.0807139	0.6773	0.999863	no	4.52532	4.22546	-0.0989108	0.46925	0.999462	no	4.25686	2.69705	-0.658408	0.0017	0.023564	yes
SARDH	chr9:136528683-136605077	0.126667	0.247094	0.964024	1	1	no	0.210524	0.325104	0.626919	1	1	no	0.251318	1.03906	2.04769	5e-05	0.00120857	yes
RXRA	chr9:137218315-137332431	35.9136	34.4027	-0.0620081	0.68445	0.999863	no	38.071	36.4682	-0.0620555	0.57525	0.999462	no	40.7075	27.4678	-0.567555	0.0003	0.00576447	yes
UBAC1	chr9:138824814-138853226	32.6647	31.8498	-0.0364483	0.82325	0.999863	no	35.6165	35.7795	0.00658662	0.95625	0.999462	no	30.4747	44.5594	0.548119	0.001	0.0155113	yes
NACC2	chr9:138898382-138987131	14.0586	12.8178	-0.133306	0.3994	0.999863	no	13.7765	13.1113	-0.0713981	0.5273	0.999462	no	14.069	9.68701	-0.538399	0.001	0.0155113	yes
CARD9	chr9:139258407-139268133	52.3024	55.111	0.0754618	0.62905	0.999863	no	56.3374	62.7568	0.155677	0.17255	0.999462	no	53.6472	76.2182	0.506631	0.00195	0.0262578	yes
TPRN	chr9:140086068-140095163	12.8044	14.2326	0.15255	0.36915	0.999863	no	13.2878	17.1561	0.368618	0.0018	0.0773726	no	11.8004	21.547	0.868649	5e-05	0.00120857	yes
TMEM203	chr9:140098534-140100090	32.4149	33.6072	0.0521127	0.74975	0.999863	no	35.2273	39.4519	0.163401	0.1656	0.999462	no	29.5932	43.7723	0.564752	0.00095	0.0148707	yes
ACER2	chr9:19408924-19452500	1.77141	1.74909	-0.0182889	0.9344	0.999863	no	1.57289	1.72464	0.132881	0.40885	0.999462	no	2.1233	1.26694	-0.744959	0.0024	0.0311227	yes
SMARCA2	chr9:2015341-2193623	69.7221	65.1852	-0.0970699	0.52455	0.999863	no	67.2727	58.0996	-0.211494	0.0563	0.830234	no	70.369	46.3892	-0.601152	0.0001	0.00223912	yes
BAG1	chr9:33252469-33264759	35.8528	37.1289	0.0504562	0.73855	0.999863	no	36.4336	37.0161	0.0228829	0.84075	0.999462	no	33.192	47.6411	0.521373	0.0015	0.0214212	yes
TPM2	chr9:35681989-35690053	134.999	144.262	0.0957412	0.5307	0.999863	no	172.431	166.069	-0.0542359	0.63165	0.999462	no	191.599	137.459	-0.479088	0.0026	0.0330582	yes
RCL1	chr9:4792833-4861064	8.83106	9.20251	0.0594399	0.74035	0.999863	no	9.43482	9.90736	0.0705053	0.5813	0.999462	no	8.37019	13.3117	0.669362	0.0003	0.00576447	yes
PLGRKT	chr9:5357966-5437937	16.1832	17.1435	0.0831617	0.66835	0.999863	no	15.6465	17.1289	0.130591	0.33155	0.999462	no	14.729	27.8985	0.921535	5e-05	0.00120857	yes
ANXA1	chr9:75766780-75785307	85.8627	78.6496	-0.126593	0.41785	0.999863	no	79.3294	69.0692	-0.199814	0.07455	0.959314	no	80.9663	46.9416	-0.786455	5e-05	0.00120857	yes
C9orf123	chr9:7796490-7799799	6.25955	6.52958	0.0609299	0.74565	0.999863	no	6.56081	6.64684	0.0187945	0.88595	0.999462	no	5.98278	8.7549	0.549273	0.00435	0.0495111	yes
PRUNE2	chr9:79226291-79521003	1.22803	1.032	-0.250907	0.18675	0.999863	no	1.42932	1.10823	-0.367075	0.00565	0.184107	no	1.84588	0.632137	-1.546	5e-05	0.00120857	yes
FRMD3	chr9:85857904-86153348	1.31676	1.45882	0.147817	0.53135	0.999863	no	1.13053	1.3688	0.275919	0.1027	0.999462	no	1.41375	2.61059	0.884845	0.0004	0.00720053	yes
SYK	chr9:93564011-93660842	59.3743	66.2066	0.157137	0.309	0.999863	no	56.8995	72.0741	0.341064	0.0026	0.102137	no	61.4195	87.9244	0.517566	0.0012	0.0179423	yes
WNK2	chr9:95947211-96108696	0.422374	0.437084	0.0493895	0.84775	0.999863	no	0.374292	0.515188	0.460933	0.00985	0.281981	no	0.340423	0.686892	1.01276	0.0004	0.00720053	yes
BARX1	chr9:96713908-96717608	223.292	268.301	0.264918	0.0862	0.999863	no	245.885	315.73	0.360709	0.0014	0.0626544	no	210.123	329.809	0.650392	0.0001	0.00223912	yes
ZMAT1	chrX:101137259-101187039	8.00098	8.14854	0.0263657	0.8787	0.999863	no	9.11154	8.4807	-0.103511	0.4063	0.999462	no	11.1002	7.09511	-0.645684	0.00035	0.00647074	yes
CLCN4	chrX:10124984-10205699	2.27464	1.97209	-0.205914	0.27765	0.999863	no	1.98455	1.75783	-0.175013	0.19605	0.999462	no	2.12557	1.31136	-0.696787	0.0006	0.0100596	yes
BEX1	chrX:102317580-102319168	99.9071	89.8638	-0.152847	0.3384	0.999863	no	91.1742	85.9306	-0.0854535	0.465	0.999462	no	108.058	33.3235	-1.6972	5e-05	0.00120857	yes
NXF3	chrX:102330749-102348022	32.9862	33.2021	0.00941237	0.95215	0.999863	no	34.3111	33.8636	-0.0189363	0.86625	0.999462	no	35.4804	25.0676	-0.501199	0.00295	0.0362614	yes
TSC22D3	chrX:106956451-107019017	45.7303	48.4448	0.0831908	0.5995	0.999863	no	54.2344	49.9121	-0.119817	0.2966	0.999462	no	71.8931	50.0232	-0.523257	0.001	0.0155113	yes
NXT2	chrX:108779009-108787927	31.8196	30.0335	-0.083341	0.60315	0.999863	no	26.9795	25.1848	-0.0993086	0.39095	0.999462	no	32.6882	17.2515	-0.922054	5e-05	0.00120857	yes
MSL3	chrX:11776277-11793872	11.6799	15.5278	0.410825	0.02	0.999863	no	12.4189	15.891	0.355673	0.0039	0.142149	no	12.3783	19.3647	0.645619	0.0002	0.004127	yes
SLC25A5	chrX:118599995-118605359	266.803	266.907	0.000563919	0.997	0.999863	no	264.984	263.778	-0.00658122	0.95305	0.999462	no	248.559	355.166	0.514905	0.00125	0.0184281	yes
SEPT6	chrX:118749687-118827333	26.2249	25.575	-0.0362021	0.82595	0.999863	no	26.2485	25.26	-0.0553793	0.64245	0.999462	no	26.9807	18.1462	-0.572255	0.0005	0.0086261	yes
NDUFA1	chrX:119004494-119010629	272.089	282.324	0.0532771	0.76785	0.999863	no	278.239	264.197	-0.0747077	0.5757	0.999462	no	278.711	415.738	0.576904	0.00145	0.0208377	yes
ZBTB33	chrX:119384606-119392251	19.2983	17.2953	-0.158092	0.3124	0.999863	no	17.2773	16.3897	-0.0760936	0.5025	0.999462	no	20.0241	14.3701	-0.478663	0.00325	0.0391402	yes
TMEM255A	chrX:119392504-119445391	1.25562	1.04204	-0.268985	0.2795	0.999863	no	1.07945	0.921394	-0.228406	0.18725	0.999462	no	1.33815	0.412437	-1.69799	5e-05	0.00120857	yes
SASH3	chrX:128913891-128929176	12.4453	11.8929	-0.0654983	0.70405	0.999863	no	11.3072	11.3955	0.0112337	0.92905	0.999462	no	10.455	15.9091	0.605663	0.0005	0.0086261	yes
LINC00086	chrX:134555867-134560225	0.631035	0.557574	-0.178556	0.5285	0.999863	no	0.632444	0.635458	0.00685865	0.9815	0.999462	no	0.668064	0.303106	-1.14017	0.00335	0.0399925	yes
FHL1	chrX:135228860-135293518	6.37111	6.5709	0.0445477	0.8111	0.999863	no	6.4499	6.68866	0.0524416	0.6987	0.999462	no	6.58998	11.0248	0.742407	0.0001	0.00223912	yes
PNMA6C	chrX:152240726-152243402	1.05683	1.16096	0.135573	0.6107	0.999863	no	1.00467	1.10995	0.143763	0.44075	0.999462	no	0.924803	1.73417	0.907027	0.00265	0.0334761	yes
PNCK	chrX:152935187-152939816	34.0941	36.5909	0.101962	0.5344	0.999863	no	41.3901	50.3049	0.281411	0.0158	0.39132	no	61.8016	38.3418	-0.688728	5e-05	0.00120857	yes
SLC6A8	chrX:152953751-152962048	45.3613	47.2966	0.0602718	0.70985	0.999863	no	59.1081	56.8394	-0.0564647	0.6211	0.999462	no	118.62	68.4592	-0.793034	5e-05	0.00120857	yes
AVPR2	chrX:153167984-153172620	0.567128	0.86442	0.608058	0.0836	0.999863	no	0.774151	1.08943	0.49289	0.0222	0.483004	no	0.640652	1.47349	1.20162	0.00185	0.0253606	yes
PLXNA3	chrX:153686622-153701985	7.17077	7.55736	0.0757542	0.63965	0.999863	no	7.79349	8.07044	0.0503768	0.67065	0.999462	no	8.77161	6.14009	-0.51458	0.0026	0.0330582	yes
CA5BP1	chrX:15693038-15721474	10.0327	9.74949	-0.041312	0.83675	0.999863	no	10.4617	10.9631	0.06755	0.6265	0.999462	no	9.16317	15.043	0.715176	0.0012	0.0179423	yes
AP1S2	chrX:15843928-15873137	101.921	110.552	0.117273	0.4485	0.999863	no	98.4837	100.143	0.0241008	0.8276	0.999462	no	89.3986	183.051	1.03392	5e-05	0.00120857	yes
PDHA1	chrX:19362010-19533379	17.7828	16.9574	-0.0685651	0.68005	0.999863	no	18.2429	17.6062	-0.0512511	0.67265	0.999462	no	17.3477	27.535	0.666524	0.00015	0.00324194	yes
SH3KBP1	chrX:19552082-19905744	48.9852	46.4904	-0.0754128	0.6202	0.999863	no	46.5476	46.126	-0.013125	0.9051	0.999462	no	50.1727	34.4423	-0.542719	0.00045	0.00792336	yes
SAT1	chrX:23801274-23804327	29.9491	36.3342	0.278817	0.10875	0.999863	no	31.4544	35.2522	0.164453	0.1813	0.999462	no	30.04	65.775	1.13066	5e-05	0.00120857	yes
APOO	chrX:23851464-23926057	4.57376	4.08435	-0.163274	0.4943	0.999863	no	4.47046	4.04556	-0.144085	0.39285	0.999462	no	4.24878	8.43129	0.988706	5e-05	0.00120857	yes
SLC9A7	chrX:46458685-46618607	1.26945	1.23918	-0.0348148	0.855	0.999863	no	1.30282	1.12718	-0.208916	0.1292	0.999462	no	1.3378	0.829114	-0.690215	0.0008	0.0129218	yes
ZNF41	chrX:47305560-47342345	4.18266	4.27783	0.0324577	0.856	0.999863	no	3.8205	4.30781	0.173194	0.18455	0.999462	no	4.17717	6.16618	0.561852	0.00285	0.0352221	yes
CFP	chrX:47483611-47489704	29.9489	30.8956	0.0449006	0.78745	0.999863	no	29.7277	32.5718	0.131815	0.26965	0.999462	no	24.4875	52.8072	1.10869	5e-05	0.00120857	yes
TFE3	chrX:48886241-48900990	13.4165	16.2034	0.272285	0.09405	0.999863	no	13.6187	17.6579	0.374729	0.0011	0.0523778	no	12.188	26.6882	1.13074	5e-05	0.00120857	yes
SPIN4	chrX:62567106-62571218	7.59903	7.00672	-0.117076	0.50105	0.999863	no	6.90244	6.93679	0.00716193	0.9549	0.999462	no	8.31814	5.6684	-0.553319	0.00215	0.0284195	yes
HDHD1	chrX:6966960-7066231	10.1868	11.984	0.234401	0.1819	0.999863	no	9.54022	12.6833	0.410832	0.00135	0.0611913	no	9.25173	16.8087	0.861416	5e-05	0.00120857	yes
IL2RG	chrX:70327253-70331481	6.30584	6.7452	0.0971725	0.62465	0.999863	no	7.24398	5.56863	-0.379461	0.0085	0.252536	no	5.52836	3.31274	-0.738824	0.00195	0.0262578	yes
COX7B	chrX:77154960-77160881	270.155	275.646	0.0290286	0.8579	0.999863	no	279.797	273.077	-0.035071	0.7599	0.999462	no	250.624	462.87	0.885079	5e-05	0.00120857	yes
LPAR4	chrX:78003205-78012578	3.90514	3.73647	-0.063698	0.74135	0.999863	no	3.23614	3.23518	-0.000424442	0.99385	0.999462	no	4.08471	2.28756	-0.836423	0.0002	0.004127	yes
TBL1X	chrX:9431334-9687780	3.16876	3.1596	-0.00417674	0.9825	0.999863	no	3.3924	3.08063	-0.13908	0.2883	0.999462	no	3.32471	1.59357	-1.06097	5e-05	0.00120857	yes
SRSF10	chr1_gl000191_random:36272-50281	66.5094	63.5887	-0.0647881	0.68695	0.999863	no	62.8886	62.4122	-0.0109722	0.926	0.999462	no	65.0923	61.1961	-0.0890462	0.5931	0.927812	no
HYDIN2	chr1_gl000192_random:55678-79327	0.232142	0.318655	0.456986	1	1	no	0.307546	0.304132	-0.0161066	1	1	no	0.27372	0.265254	-0.0453286	1	1	no
NMNAT1	chr1:10003485-10045556	6.04423	6.83483	0.177346	0.30635	0.999863	no	5.86497	6.16641	0.0723085	0.56495	0.999462	no	5.98587	7.17544	0.261505	0.14375	0.537481	no
FRRS1	chr1:100111430-100231349	4.54116	4.30497	-0.0770569	0.69325	0.999863	no	4.33275	4.55731	0.0728985	0.60925	0.999462	no	4.81661	5.58072	0.212433	0.2755	0.724057	no
MIR548AA1	chr1:100111430-100231349	0	0	0	1	1	no	0	0	0	1	1	no	0	0	0	1	1	no
PALMD	chr1:100111430-100231349	0	0	0	1	1	no	0.00610045	0	-inf	1	1	no	0.0110721	0	-inf	1	1	no
AGL	chr1:100315639-100389579	4.50137	4.31251	-0.0618345	0.71035	0.999863	no	4.23054	4.31343	0.0279929	0.81635	0.999462	no	4.54025	5.07348	0.160204	0.35295	0.797738	no
SLC35A3	chr1:100435344-100492534	5.63966	5.86164	0.0556958	0.7389	0.999863	no	5.49436	5.64461	0.0389235	0.7459	0.999462	no	6.42614	5.143	-0.321343	0.0657	0.34531	no
HIAT1	chr1:100503788-100548929	48.6706	44.6783	-0.123477	0.4254	0.999863	no	43.7943	40.9785	-0.095874	0.39615	0.999462	no	45.6444	43.712	-0.0624104	0.697	0.95855	no
SASS6	chr1:100549101-100598511	11.0729	10.7936	-0.0368541	0.8224	0.999863	no	10.8344	10.0684	-0.105795	0.3778	0.999462	no	12.7323	10.4712	-0.28207	0.0953	0.430155	no
RBP7	chr1:10057254-10076078	0.439123	0.628584	0.517479	0.4149	0.999863	no	0.635121	0.718886	0.17873	0.6453	0.999462	no	1.06024	1.03922	-0.0288918	0.93725	0.990236	no
LRRC39	chr1:100598705-100643829	3.34535	2.93275	-0.189902	0.63425	0.999863	no	3.23718	3.31391	0.0337936	0.9085	0.999462	no	3.99667	3.25142	-0.297726	0.4555	0.870592	no
TRMT13	chr1:100598705-100643829	8.37575	8.64572	0.045767	0.8091	0.999863	no	8.05724	7.80382	-0.0461047	0.73945	0.999462	no	9.23635	8.30384	-0.153544	0.42085	0.849437	no
DBT	chr1:100652477-100715409	3.41855	3.67757	0.105371	0.5309	0.999863	no	3.27958	3.37977	0.0434125	0.7235	0.999462	no	4.00615	3.38227	-0.244224	0.14895	0.54691	no
RNF223	chr1:1007125-1009687	0	0.0401573	inf	1	1	no	0	0.0101709	inf	1	1	no	0.0250011	0	-inf	1	1	no
MIR553	chr1:100731713-100758325	0	107.858	inf	0.23585	0.999863	no	66.5339	50.1952	-0.40654	1	1	no	0	0	0	1	1	no
RTCA	chr1:100731713-100758325	36.2543	38.1943	0.0752036	0.63605	0.999863	no	37.0177	36.9959	-0.000849579	0.99445	0.999462	no	38.3845	37.8219	-0.0213013	0.8887	0.987625	no
CDC14A	chr1:100818022-100985833	8.36958	7.8434	-0.0936764	0.57895	0.999863	no	7.40978	7.41912	0.00181727	0.98695	0.999462	no	8.34078	6.78313	-0.298231	0.08435	0.398478	no
UBE4B	chr1:10093040-10241296	12.497	11.9633	-0.0629706	0.69895	0.999863	no	11.3084	12.1278	0.100921	0.3844	0.999462	no	12.2747	11.3445	-0.113701	0.4826	0.88502	no
GPR88	chr1:101003727-101007583	0.124486	0.0884707	-0.492716	1	1	no	0.110701	0.137276	0.310405	1	1	no	0.136964	0.328273	1.2611	1	1	no
LOC100128787	chr1:101092605-101112560	0	0	0	1	1	no	0	0	0	1	1	no	0	0	0	1	1	no
VCAM1	chr1:101185195-101204601	0.00590838	0.00827614	0.486196	1	1	no	0.00932913	0.00451217	-1.04792	1	1	no	0.00930251	0.00945971	0.0241749	1	1	no
EXTL2	chr1:101337927-101360735	2.9904	2.84629	-0.0712566	0.72655	0.999863	no	2.58038	2.8469	0.141805	0.32115	0.999462	no	2.8844	2.13862	-0.431593	0.0434	0.265306	no
SLC30A7	chr1:101361631-101447311	6.48583	6.09418	-0.0898604	0.58695	0.999863	no	5.85397	5.78009	-0.0183242	0.8777	0.999462	no	6.04505	5.60409	-0.109274	0.51735	0.902329	no
DPH5	chr1:101455179-101491362	10.3899	10.5017	0.0154426	0.9342	0.999863	no	10.403	9.94841	-0.0644631	0.6236	0.999462	no	9.85113	12.9033	0.389381	0.03775	0.242127	no
S1PR1	chr1:101702304-101707076	0	0.00784355	inf	1	1	no	0	0	0	1	1	no	0	0	0	1	1	no
C1orf159	chr1:1017197-1051736	6.04777	5.38036	-0.168701	0.3833	0.999863	no	6.19575	6.85212	0.145271	0.27985	0.999462	no	6.03907	6.26263	0.052443	0.78485	0.97317	no
RNU6-6	chr1:101806424-101806451	0	0	0	1	1	no	0	0	0	1	1	no	0	0	0	1	1	no
DNAJA1P5	chr1:102268126-102462790	0	0	0	1	1	no	0	0	0	1	1	no	0	0	0	1	1	no
OLFM3	chr1:102268126-102462790	0.00501413	0.0158723	1.66243	1	1	no	0.00448918	0.00721439	0.684426	1	1	no	0.00831271	0	-inf	1	1	no
KIF1B	chr1:10270763-10441661	3.87258	3.65191	-0.0846461	0.62395	0.999863	no	3.48586	3.42628	-0.024872	0.84245	0.999462	no	3.49897	3.20211	-0.127908	0.46625	0.876492	no
COL11A1	chr1:103342022-103574052	0	0.00713207	inf	1	1	no	0.00163279	0.00384874	1.23705	1	1	no	0.00788786	0.00393372	-1.00374	1	1	no
ACTG1P4	chr1:104068577-104122149	0.121405	0.16476	0.440537	1	1	no	0.221561	0.212702	-0.0588654	1	1	no	0.162316	0.161189	-0.0100523	1	1	no
AMY2B	chr1:104068577-104122149	3.38158	3.77518	0.158844	0.7355	0.999863	no	3.91991	3.60949	-0.119026	0.7036	0.999462	no	4.65004	3.94995	-0.235409	0.53275	0.910151	no
RNPC3	chr1:104068577-104122149	17.9094	17.9022	-0.000575987	0.9973	0.999863	no	17.1769	17.3802	0.0169747	0.9051	0.999462	no	19.8008	19.3342	-0.0344046	0.85465	0.983534	no
AMY2A	chr1:104159998-104168400	0.0150073	0	-inf	1	1	no	0.0102841	0	-inf	1	1	no	0	0	0	1	1	no
AMY1A,AMY1B,AMY1C	chr1:104292278-104301311	0	0	0	1	1	no	0	0	0	1	1	no	0	0	0	1	1	no
AMY1B	chr1:104292278-104301311	0	0	0	1	1	no	0	0	0	1	1	no	0	0	0	1	1	no
AMY1C	chr1:104292278-104301311	0	0	0	1	1	no	0	0	0	1	1	no	0	0	0	1	1	no
PGD	chr1:10459084-10480201	178.929	178.475	-0.00366452	0.9821	0.999863	no	178.838	163.945	-0.125447	0.25825	0.999462	no	153.353	161.842	0.0777228	0.6195	0.938684	no
LOC100129138	chr1:104615644-104619693	0.250316	0.234426	-0.0946167	1	1	no	0.319199	0.266077	-0.262611	1	1	no	0.186469	0.276208	0.566821	1	1	no
APITD1-CORT	chr1:10490158-10512060	0.197601	0.0774251	-1.35172	1	1	no	0.169659	0.205788	0.278514	1	1	no	0.461777	0	-inf	1	1	no
APITD1,APITD1-CORT	chr1:10490158-10512060	12.1648	11.4214	-0.0909704	0.6348	0.999863	no	11.2298	10.5172	-0.0945791	0.49875	0.999462	no	11.3034	9.4959	-0.251377	0.2143	0.65378	no
CORT	chr1:10490158-10512060	0.242775	0.194705	-0.318336	1	1	no	0.062894	0.114974	0.870315	1	1	no	0.041134	0.127908	1.6367	1	1	no
DFFA	chr1:10520602-10532613	6.82123	7.86422	0.205271	0.2747	0.999863	no	7.22033	7.88766	0.127532	0.35985	0.999462	no	7.8811	8.92541	0.179522	0.33815	0.782449	no
PEX14	chr1:10535002-10690815	13.0428	13.2098	0.0183615	0.9172	0.999863	no	13.9183	14.306	0.0396303	0.7531	0.999462	no	12.813	13.2538	0.0488033	0.7793	0.972474	no
CASZ1	chr1:10696665-10856733	1.32616	1.14323	-0.214138	0.33265	0.999863	no	1.22996	1.31749	0.099186	0.52495	0.999462	no	0.992171	1.14364	0.204975	0.39665	0.831635	no
LOC254099	chr1:1072396-1079434	0	0	0	1	1	no	0	0	0	1	1	no	0	0	0	1	1	no
PRMT6	chr1:107599266-107601916	17.0958	15.2495	-0.164879	0.32625	0.999863	no	15.6774	15.539	-0.0127852	0.9154	0.999462	no	14.4274	15.6324	0.115726	0.5005	0.89286	no
NTNG1	chr1:107682628-108024475	0	0.00841245	inf	1	1	no	0	0	0	1	1	no	0.00962051	0	-inf	1	1	no
VAV3	chr1:108113781-108537229	20.0998	19.4039	-0.0508353	0.76285	0.999863	no	20.1271	17.9447	-0.165579	0.20425	0.999462	no	19.9198	15.4999	-0.361946	0.0342	0.226143	no
VAV3-AS1	chr1:108113781-108537229	0.380169	0.561898	0.563667	0.80675	0.999863	no	0.382736	0.277313	-0.464836	0.81815	0.999462	no	0.246787	0.144451	-0.772689	1	1	no
SLC25A24	chr1:108677343-108742980	26.5537	25.066	-0.0831821	0.59905	0.999863	no	24.9153	24.0788	-0.0492647	0.6606	0.999462	no	26.8381	21.5206	-0.318565	0.04845	0.284361	no
NBPF4	chr1:108765962-108786703	0.453325	0.543563	0.261901	0.4507	0.999863	no	0.512183	0.469089	-0.126796	0.57905	0.999462	no	0.541202	0.830071	0.617068	0.06935	0.356415	no
NBPF6	chr1:108992903-109013260	0.0370033	0.069712	0.913752	1	1	no	0.0787412	0.041686	-0.917555	1	1	no	0.130879	0.141413	0.111687	1	1	no
HENMT1	chr1:109190909-109204148	30.0551	28.9788	-0.0526133	0.74695	0.999863	no	29.2439	29.7304	0.0238065	0.84215	0.999462	no	27.6613	25.7798	-0.101631	0.54335	0.911871	no
PRPF38B	chr1:109234931-109244422	39.3922	40.5239	0.0408643	0.78905	0.999863	no	39.7121	38.2679	-0.0534455	0.6353	0.999462	no	43.0204	37.3564	-0.203664	0.1929	0.619644	no
FNDC7	chr1:109255555-109285367	0.0327087	0.0162312	-1.01091	1	1	no	0.046263	0.0336409	-0.459643	1	1	no	0.00927374	0.0778577	3.06962	1	1	no
STXBP3	chr1:109289284-109352148	40.2228	38.5061	-0.062926	0.6902	0.999863	no	38.0428	35.4443	-0.10207	0.37065	0.999462	no	38.977	34.4225	-0.179272	0.2617	0.707708	no
AKNAD1	chr1:109358519-109401146	0	0	0	1	1	no	0.0039825	0.0089355	1.16587	1	1	no	0.0189766	0	-inf	1	1	no
SRG7	chr1:109358519-109401146	0	0	0	1	1	no	0.0400226	0	-inf	1	1	no	0	0	0	1	1	no
CLCC1	chr1:109419602-109506111	9.26654	9.49505	0.035145	0.8752	0.999863	no	9.3398	9.25952	-0.0124549	0.94235	0.999462	no	8.9673	8.57463	-0.0645993	0.7749	0.97049	no
GPSM2	chr1:109419602-109506111	14.6002	14.45	-0.0149191	0.94805	0.999863	no	12.9923	13.862	0.0934724	0.60345	0.999462	no	13.8436	11.8682	-0.222115	0.35945	0.802355	no
WDR47	chr1:109512837-109584850	6.91216	6.66894	-0.0516811	0.75855	0.999863	no	6.31675	6.12314	-0.0449104	0.7181	0.999462	no	6.80064	4.8892	-0.476071	0.0071	0.0720053	no
TAF13	chr1:109606997-109618624	27.0252	29.4412	0.123531	0.52585	0.999863	no	23.6728	25.2205	0.0913663	0.511	0.999462	no	24.7628	28.6062	0.208153	0.30975	0.758696	no
TMEM167B	chr1:109633402-109639554	20.3445	20.6165	0.0191626	0.9091	0.999863	no	19.3972	19.3343	-0.00469185	0.9672	0.999462	no	20.1291	22.7835	0.178708	0.2827	0.731672	no
SCARNA2	chr1:109642814-109643234	0.567888	1.40311	1.30495	0.0951	0.999863	no	1.3164	1.30194	-0.0159288	0.9423	0.999462	no	2.22109	1.25421	-0.824486	0.1803	0.600751	no
C1orf194	chr1:109648572-109656479	0.0786574	0.0444528	-0.823308	1	1	no	0.0713579	0.112641	0.658586	1	1	no	0.0480562	0.0578108	0.266617	1	1	no
KIAA1324	chr1:109656584-109749403	0.339408	0.375513	0.145843	0.5985	0.999863	no	0.40736	0.408602	0.0043918	0.98205	0.999462	no	0.369817	0.497764	0.42865	1	1	no
SARS	chr1:109756514-109780804	62.342	63.5069	0.0267073	0.86765	0.999863	no	64.019	63.4661	-0.0125143	0.91345	0.999462	no	57.4551	66.5637	0.2123	0.17885	0.597959	no
CELSR2	chr1:109792640-109818378	1.63659	1.59718	-0.0351671	0.8462	0.999863	no	1.62011	1.77835	0.134443	0.2979	0.999462	no	1.55165	1.62422	0.065943	0.72505	0.963142	no
PSRC1	chr1:109822175-109825790	27.8893	28.391	0.0257182	0.87745	0.999863	no	28.5817	31.3657	0.134096	0.26285	0.999462	no	28.0381	25.6404	-0.128971	0.4551	0.870427	no
MYBPHL	chr1:109834986-109849663	0.194823	0.162592	-0.260903	1	1	no	0.249562	0.272998	0.129495	1	1	no	0.266914	0.129936	-1.03858	1	1	no
SORT1	chr1:109852187-109940563	2.64249	2.58344	-0.0326049	0.85835	0.999863	no	2.32283	2.25059	-0.0455779	0.7319	0.999462	no	2.67718	2.10126	-0.349462	0.06	0.327819	no
PSMA5	chr1:109941652-109969108	34.2945	35.3406	0.0433484	0.78325	0.999863	no	33.9398	32.4448	-0.064991	0.5738	0.999462	no	31.6206	37.0026	0.226759	0.1509	0.551553	no
SYPL2	chr1:110009099-110024764	0.0668103	0.0469575	-0.508713	1	1	no	0.0349203	0.034378	-0.0225808	1	1	no	0.0337762	0.0429294	0.345958	1	1	no
ATXN7L2	chr1:110026560-110035420	3.10673	3.00579	-0.0476546	0.82235	0.999863	no	2.81177	2.87535	0.0322561	0.83115	0.999462	no	2.73214	2.01423	-0.439802	0.06525	0.343605	no
CYB561D1	chr1:110036657-110043063	6.13622	6.34462	0.0481816	0.7789	0.999863	no	6.22553	6.78935	0.125077	0.3149	0.999462	no	5.88747	6.39828	0.120037	0.4966	0.891865	no
AMIGO1	chr1:110049445-110052336	0.538038	0.589495	0.131773	0.6913	0.999863	no	0.428075	0.573689	0.422405	0.06585	0.905006	no	0.651689	0.694304	0.0913853	0.78285	0.972751	no
C1orf127	chr1:11006529-11042094	2.54672	2.7988	0.136168	0.5137	0.999863	no	2.95296	3.2069	0.119017	0.4047	0.999462	no	3.02441	3.65909	0.274829	0.1888	0.614116	no
GPR61	chr1:110082493-110088455	0.0319711	0.0361391	0.176791	1	1	no	0.028291	0.0132765	-1.09147	1	1	no	0	0.0116857	inf	1	1	no
GNAI3	chr1:110091185-110138454	35.8195	34.3033	-0.0624	0.6872	0.999863	no	34.3258	33.0494	-0.0546686	0.6275	0.999462	no	33.7922	31.2687	-0.11197	0.47435	0.879678	no
MIR197	chr1:110141514-110141589	49.7903	0	-inf	0.126	0.999863	no	0	0	0	1	1	no	0	0	0	1	1	no
GNAT2	chr1:110145888-110155705	0.161669	0.272631	0.753901	1	1	no	0.235473	0.181625	-0.374601	1	1	no	0.0828264	0.201087	1.27966	1	1	no
AMPD2	chr1:110162434-110174677	12.4636	12.7344	0.0310076	0.85175	0.999863	no	13.8035	13.8237	0.00210738	0.9855	0.999462	no	14.5653	16.5799	0.1869	0.2669	0.714408	no
GSTM4	chr1:110198697-110208123	19.4185	18.7381	-0.05145	0.7661	0.999863	no	19.6382	20.6937	0.075535	0.5527	0.999462	no	21.5706	18.5537	-0.217364	0.21815	0.658408	no
GSTM2	chr1:110210643-110226619	5.04251	4.09275	-0.30107	0.1859	0.999863	no	6.03646	5.55364	-0.12027	0.4266	0.999462	no	5.84129	7.35423	0.332286	0.13035	0.507973	no
GSTM1	chr1:110230417-110236367	28.0626	26.105	-0.104326	0.5397	0.999863	no	26.5059	27.1494	0.0346113	0.78475	0.999462	no	26.3147	22.9199	-0.19927	0.2588	0.704181	no
MIR200B	chr1:1102483-1102578	0	0	0	1	1	no	0	0	0	1	1	no	0	0	0	1	1	no
GSTM5	chr1:110254863-110260890	0.023526	0.0819555	1.80058	1	1	no	0.118116	0.052599	-1.1671	1	1	no	0.0894499	0.14448	0.691716	1	1	no
GSTM3	chr1:110276553-110283660	14.8785	14.8349	-0.00423934	0.9784	0.999863	no	15.1929	15.1875	-0.00050424	0.9966	0.999462	no	14.9826	11.6053	-0.368497	0.0261	0.187539	no
EPS8L3	chr1:110292701-110306644	2.81565	3.03278	0.107175	0.6164	0.999863	no	3.19092	2.77885	-0.199485	0.18375	0.999462	no	2.95654	2.13904	-0.466946	0.0465	0.27756	no
MIR200A	chr1:1103242-1103332	0	0	0	1	1	no	0	0	0	1	1	no	0	0	0	1	1	no
MIR429	chr1:1104384-1104467	0	0	0	1	1	no	0	0	0	1	1	no	0	0	0	1	1	no
CSF1	chr1:110453232-110473616	1.3406	1.30001	-0.0443666	0.8484	0.999863	no	1.52541	1.1541	-0.402434	0.0126	0.333688	no	1.07068	0.832695	-0.362674	0.1775	0.595921	no
AHCYL1	chr1:110527386-110566364	33.6894	32.9933	-0.0301238	0.84055	0.999863	no	33.6328	31.4358	-0.0974635	0.385	0.999462	no	31.9245	32.2344	0.0139375	0.92785	0.989939	no
STRIP1	chr1:110574198-110597263	16.6719	16.7711	0.00855919	0.9591	0.999863	no	17.9098	17.2251	-0.0562391	0.6333	0.999462	no	14.6856	15.9489	0.119054	0.47185	0.879426	no
ALX3	chr1:110602996-110613322	0.837339	0.775726	-0.110265	0.7535	0.999863	no	0.805282	0.931682	0.210345	0.3601	0.999462	no	0.844386	0.753784	-0.163752	0.6671	0.950875	no
UBL4B	chr1:110655061-110656569	0.0394721	0.0122047	-1.6934	1	1	no	0.0502908	0.0367953	-0.450771	1	1	no	0	0.0603301	inf	1	1	no
SLC6A17	chr1:110693131-110744823	0.00307372	0.00619828	1.01188	1	1	no	0.00228434	0	-inf	1	1	no	0	0	0	1	1	no
TARDBP	chr1:11072678-11085549	52.6377	51.9855	-0.0179849	0.90945	0.999863	no	52.4332	50.9749	-0.0406934	0.71525	0.999462	no	53.1669	51.223	-0.0537347	0.73065	0.963643	no
KCNC4	chr1:110753335-110776674	2.14915	2.06884	-0.0549459	0.79175	0.999863	no	2.47908	2.32839	-0.090472	0.51455	0.999462	no	2.01694	1.78273	-0.178076	0.40605	0.83915	no
LOC440600	chr1:110828998-110881793	0.50106	0.619423	0.305943	0.3459	0.999863	no	0.49308	0.516539	0.0670549	0.76615	0.999462	no	0.537663	0.567741	0.0785307	0.8234	0.980276	no
MASP2	chr1:11086579-11107296	1.21033	1.15355	-0.069314	0.78715	0.999863	no	1.40096	1.47504	0.0743351	0.6662	0.999462	no	1.55556	1.35195	-0.202399	0.43145	0.857323	no
RBM15	chr1:110881944-110889303	11.171	11.2486	0.00999388	0.95315	0.999863	no	10.909	11.9232	0.128247	0.28295	0.999462	no	12.4713	11.565	-0.108852	0.5198	0.903836	no
SLC16A4	chr1:110905472-110933704	0.862755	1.09774	0.347514	0.21645	0.999863	no	1.05154	1.16093	0.142781	0.4413	0.999462	no	1.32101	0.990493	-0.415418	0.1456	0.540851	no
TTLL10	chr1:1109285-1133313	0.00782013	0.0150965	0.948946	1	1	no	0	0.00458232	inf	1	1	no	0	0	0	1	1	no
LAMTOR5	chr1:110943876-110950546	103.066	102.561	-0.00708184	0.9638	0.999863	no	103.963	99.1597	-0.0682493	0.5472	0.999462	no	97.6793	114.397	0.227924	0.16005	0.567559	no
PROK1	chr1:110993787-110999976	0.0338367	0.0336334	-0.00869192	1	1	no	0.106543	0.041489	-1.36063	1	1	no	0.0431026	0.0466086	0.112819	1	1	no
CYMP	chr1:111023387-111033891	0	0	0	1	1	no	0	0	0	1	1	no	0	0	0	1	1	no
KCNA10	chr1:111059838-111061797	0	0.00934711	inf	1	1	no	0	0	0	1	1	no	0	0	0	1	1	no
KCNA2	chr1:111136201-111174096	0	0	0	1	1	no	0	0.00624428	inf	1	1	no	0	0	0	1	1	no
SRM	chr1:11114648-11120091	63.1582	59.6752	-0.0818381	0.603	0.999863	no	62.8979	62.2444	-0.0150679	0.8959	0.999462	no	57.163	65.0119	0.185623	0.2561	0.700737	no
EXOSC10	chr1:11126675-11159938	43.9797	42.4697	-0.0504058	0.74635	0.999863	no	44.2741	43.8524	-0.013807	0.90165	0.999462	no	42.8105	40.5276	-0.0790596	0.6136	0.936715	no
CD53	chr1:111413820-111442558	51.786	51.1545	-0.0177014	0.91175	0.999863	no	49.5432	44.8988	-0.142008	0.2243	0.999462	no	48.014	48.6339	0.0185077	0.9066	0.98846	no
LRIF1	chr1:111489811-111506566	33.2675	31.1169	-0.0964167	0.581	0.999863	no	29.5255	27.9188	-0.0807234	0.52785	0.999462	no	31.7339	26.2265	-0.275	0.11215	0.468276	no
CEPT1	chr1:111659953-111727724	25.6039	26.3895	0.0436004	0.8615	0.999863	no	25.0469	25.8861	0.0475481	0.8002	0.999462	no	26.1462	25.9919	-0.00853767	0.974	0.994601	no
DRAM2	chr1:111659953-111727724	46.5405	45.1324	-0.0443226	0.83395	0.999863	no	47.3525	47.4318	0.00241318	0.98625	0.999462	no	47.0963	57.0929	0.277698	0.1664	0.577211	no
ANGPTL7	chr1:11166587-11322608	0.00982925	0.0115198	0.228956	1	1	no	0.00655002	0.0168157	1.36023	1	1	no	0	0.0273883	inf	1	1	no
MTOR	chr1:11166587-11322608	9.12956	9.13359	0.000637458	0.99705	0.999863	no	8.50461	8.64075	0.0229112	0.84315	0.999462	no	8.8768	10.4018	0.228721	0.1559	0.561281	no
MTOR-AS1	chr1:11166587-11322608	0.719436	0.983827	0.451537	0.8309	0.999863	no	0.515169	0.813667	0.659393	0.78735	0.999462	no	0.60209	0.737269	0.29221	0.88275	0.986998	no
DENND2D	chr1:111728590-111747160	7.42297	7.42521	0.000435671	0.9979	0.999863	no	7.67727	8.06368	0.0708451	0.57475	0.999462	no	7.71813	9.13453	0.24308	0.1649	0.574776	no
CHI3L2	chr1:111770280-111786062	0.0951477	0.261988	1.46126	1	1	no	0.171882	0.135215	-0.346164	1	1	no	0.166741	0.1631	-0.0318508	1	1	no
CHIAP2	chr1:111823145-111828730	0.08647	0.109501	0.340668	1	1	no	0.10884	0.167235	0.619668	1	1	no	0.188417	0.15409	-0.290159	1	1	no
CHIA	chr1:111833473-111863188	0.0156532	0	-inf	1	1	no	0	0	0	1	1	no	0	0	0	1	1	no
PIFO	chr1:111889194-111895639	0.143965	0.106333	-0.437133	1	1	no	0.0942961	0.11814	0.325224	1	1	no	0.223799	0.147705	-0.59948	1	1	no
PGCP1	chr1:111927140-111932473	0	0	0	1	1	no	0	0	0	1	1	no	0	0	0	1	1	no
OVGP1	chr1:111956936-111970399	0.699216	0.766139	0.131868	0.67415	0.999863	no	0.862338	0.735337	-0.229847	0.25425	0.999462	no	0.802449	1.07184	0.417613	0.18215	0.604413	no
WDR77	chr1:111982511-112004525	24.0467	23.1606	-0.0541649	0.88515	0.999863	no	23.0745	21.7246	-0.0869736	0.7535	0.999462	no	20.142	23.8221	0.242099	0.5563	0.917423	no
C1orf162	chr1:112016603-112021134	38.6672	37.7637	-0.0341068	0.84515	0.999863	no	40.0441	38.0988	-0.0718426	0.55325	0.999462	no	38.693	36.1477	-0.098172	0.58285	0.924518	no
ADORA3	chr1:112025969-112106597	2.35201	2.47858	0.0756224	0.78225	0.999863	no	2.13638	2.471	0.209925	0.274	0.999462	no	2.3002	3.1251	0.442142	0.12475	0.495901	no
LOC100129269	chr1:112141628-112150940	3.99016	3.79132	-0.0737463	0.74555	0.999863	no	4.38097	4.48892	0.0351172	0.8175	0.999462	no	3.54034	4.25417	0.264988	0.26095	0.707055	no
RAP1A	chr1:112162404-112256101	74.2988	69.9519	-0.0869754	0.58105	0.999863	no	72.9916	70.7394	-0.0452176	0.6845	0.999462	no	72.9514	75.9914	0.058902	0.7116	0.961798	no
DDX20	chr1:112264685-112310199	12.0788	11.5044	-0.0702906	0.69265	0.999863	no	11.151	10.6981	-0.059821	0.645	0.999462	no	11.5103	10.392	-0.14745	0.4237	0.851946	no
FAM212B	chr1:112264685-112310199	1.20628	1.1993	-0.00836952	0.985	0.999863	no	1.23225	1.2985	0.0755511	0.7971	0.999462	no	1.33344	1.14552	-0.21914	0.6091	0.934978	no
LOC100506343	chr1:112264685-112310199	0.0436096	0.03219	-0.43803	1	1	no	0.00558466	0.0203394	1.86474	1	1	no	0	0.0144359	inf	1	1	no
KCND3	chr1:112318453-112531777	0.00680781	0	-inf	1	1	no	0.0055046	0	-inf	1	1	no	0	0	0	1	1	no
LOC643355	chr1:112533189-112541463	0.00704819	0	-inf	1	1	no	0.00926687	0	-inf	1	1	no	0.00870711	0	-inf	1	1	no
CTTNBP2NL	chr1:112938799-113003786	1.89293	1.80882	-0.0655714	0.7385	0.999863	no	1.73681	1.75816	0.0176278	0.89805	0.999462	no	1.67343	1.51947	-0.139239	0.4994	0.892643	no
MIR4256	chr1:113004391-113004455	0	0	0	1	1	no	0	0	0	1	1	no	0	0	0	1	1	no
WNT2B	chr1:113010039-113063910	0.185966	0.17397	-0.0961972	1	1	no	0.0974954	0.158098	0.697415	1	1	no	0.255158	0.296056	0.214479	1	1	no
ST7L	chr1:113066140-113162040	6.64086	7.18855	0.114332	0.5691	0.999863	no	6.23039	6.06187	-0.0395603	0.78115	0.999462	no	6.56824	6.12875	-0.0999149	0.61845	0.938236	no
CAPZA1	chr1:113162074-113214241	212.32	202.644	-0.0672954	0.65925	0.999863	no	204.447	194.622	-0.0710547	0.5267	0.999462	no	204.63	203.609	-0.00721622	0.96105	0.994145	no
MOV10	chr1:113217047-113243368	25.3629	26.8123	0.0801751	0.6042	0.999863	no	27.608	28.2016	0.0306943	0.78255	0.999462	no	27.1042	25.5043	-0.087778	0.5742	0.923741	no
RHOC	chr1:113243748-113250025	95.5352	101.577	0.0884665	0.5751	0.999863	no	103.677	105.348	0.0230629	0.84505	0.999462	no	91.3922	96.6081	0.0800737	0.6153	0.937512	no
PPM1J	chr1:113252615-113257950	0.38994	0.332853	-0.228365	0.6069	0.999863	no	0.328152	0.286319	-0.196742	1	1	no	0.316571	0.144779	-1.12867	1	1	no
FAM19A3	chr1:113263188-113269856	0.371673	0.279629	-0.410517	0.4579	0.999863	no	0.201401	0.265293	0.397515	1	1	no	0.229429	0.305564	0.413427	1	1	no
UBIAD1	chr1:11333254-11348491	4.7315	4.41541	-0.0997512	0.58175	0.999863	no	4.29655	4.4089	0.0372386	0.7796	0.999462	no	3.86666	4.79908	0.311668	0.10485	0.453941	no
AKR7A2P1	chr1:113454469-113498975	0.0367565	0.0945274	1.36274	1	1	no	0.185389	0.187393	0.0155081	1	1	no	0.0692504	0.14813	1.09697	1	1	no
SLC16A1	chr1:113454469-113498975	18.6288	16.8829	-0.141974	0.3789	0.999863	no	16.6216	15.0403	-0.144222	0.2204	0.999462	no	17.1895	18.5919	0.113146	0.48805	0.888683	no
LRIG2	chr1:113615830-113667342	3.95216	4.41957	0.161265	0.37915	0.999863	no	4.44718	4.02666	-0.143305	0.2736	0.999462	no	4.48244	4.02708	-0.154552	0.4127	0.842835	no
LOC643441	chr1:113739403-113748875	0	0	0	1	1	no	0	0.00544068	inf	1	1	no	0	0.0149607	inf	1	1	no
TNFRSF18	chr1:1138887-1142089	0.594664	0.458158	-0.37623	0.399	0.999863	no	0.543356	0.36731	-0.564901	0.10295	0.999462	no	0.268177	0.176897	-0.600281	1	1	no
MAGI3	chr1:113933474-114228545	2.65447	2.5991	-0.0304123	0.86795	0.999863	no	2.53524	2.52027	-0.00854477	0.94465	0.999462	no	2.83188	2.08074	-0.444665	0.0193	0.150538	no
PHTF1	chr1:114239823-114301777	13.7349	14.0369	0.0313785	0.852	0.999863	no	13.6855	12.5757	-0.122008	0.3094	0.999462	no	13.6997	12.3065	-0.154729	0.3573	0.800167	no
RSBN1	chr1:114304453-114355070	8.30399	7.82501	-0.0857111	0.5982	0.999863	no	8.43971	7.90737	-0.0939954	0.42105	0.999462	no	9.91426	7.96145	-0.316474	0.0582	0.322232	no
AP4B1	chr1:114356432-114447741	15.2583	15.8735	0.0570182	0.7915	0.999863	no	16.9846	16.0636	-0.0804319	0.62485	0.999462	no	16.4151	16.1552	-0.0230181	0.91345	0.988914	no
AP4B1-AS1	chr1:114356432-114447741	1.34406	1.56628	0.220742	0.7917	0.999863	no	1.74315	1.53445	-0.183983	0.77695	0.999462	no	1.64727	1.37016	-0.265733	0.7933	0.975371	no
BCL2L15	chr1:114356432-114447741	0.498477	0.567026	0.185888	0.8119	0.999863	no	0.55917	0.542833	-0.0427796	0.9427	0.999462	no	0.568085	0.600906	0.0810322	0.9189	0.989375	no
PTPN22	chr1:114356432-114447741	6.20138	5.97699	-0.0531702	0.86425	0.999863	no	6.51695	5.95747	-0.129498	0.60685	0.999462	no	6.39686	6.36057	-0.0082078	0.97725	0.994885	no
DCLRE1B	chr1:114447914-114456708	10.0159	9.81561	-0.0291455	0.86685	0.999863	no	9.23241	9.92687	0.104631	0.3924	0.999462	no	9.70658	8.3961	-0.209243	0.22215	0.664928	no
HIPK1	chr1:114471995-114520491	24.8139	23.0622	-0.10562	0.4939	0.999863	no	23.2133	22.0798	-0.0722276	0.53035	0.999462	no	24.8898	20.4073	-0.286465	0.07215	0.363969	no
SYT6	chr1:114631913-114696472	0.046746	0.0156697	-1.57687	1	1	no	0.0311835	0.0323415	0.0526041	1	1	no	0.0477575	0.0408506	-0.225372	1	1	no
TNFRSF4	chr1:1146705-1149548	0.103326	0.0344679	-1.58388	1	1	no	0.0694259	0.040244	-0.786702	1	1	no	0.077867	0	-inf	1	1	no
TRIM33	chr1:114935398-115053781	10.257	9.78408	-0.0680972	0.67605	0.999863	no	9.41604	8.86129	-0.0876027	0.4545	0.999462	no	10.2046	8.71157	-0.228218	0.15925	0.56619	no
BCAS2	chr1:115110180-115124265	39.6418	39.02	-0.0228107	0.88865	0.999863	no	37.2726	34.7116	-0.1027	0.39005	0.999462	no	36.7339	32.3232	-0.184542	0.2756	0.724057	no
DENND2C	chr1:115127195-115212732	0.218009	0.165176	-0.400382	1	1	no	0.21874	0.196082	-0.157757	1	1	no	0.28809	0.114815	-1.32721	1	1	no
AMPD1	chr1:115215719-115238239	0.00941456	0	-inf	1	1	no	0.00495356	0.00571158	0.205424	1	1	no	0	0.0138304	inf	1	1	no
SDF4	chr1:1152287-1167447	86.3213	85.878	-0.00742769	0.9625	0.999863	no	90.3845	95.4763	0.0790682	0.47145	0.999462	no	78.8748	82.8352	0.0706782	0.6442	0.946459	no
NRAS	chr1:115247084-115259515	43.872	42.6216	-0.041713	0.786	0.999863	no	41.4413	39.4006	-0.0728502	0.52045	0.999462	no	41.2447	34.8363	-0.243617	0.11995	0.486089	no
CSDE1	chr1:115259533-115300671	255.753	253.837	-0.0108472	0.9487	0.999863	no	243.726	241.349	-0.0141428	0.90065	0.999462	no	259.356	269.254	0.0540381	0.74065	0.966619	no
SIKE1	chr1:115312104-115323308	15.6163	15.0514	-0.053157	0.7382	0.999863	no	14.7383	15.186	0.043178	0.7032	0.999462	no	15.4871	16.7404	0.112269	0.4836	0.885931	no
PTCHD2	chr1:11539294-11597640	0.0255104	0.0129404	-0.979201	1	1	no	0.0203773	0.0196375	-0.0533455	1	1	no	0.00957128	0.010669	0.156635	1	1	no
SYCP1	chr1:115397454-115537990	0.036519	0.03461	-0.0774568	1	1	no	0.00742681	0.014433	0.958553	1	1	no	0.0396736	0.00918915	-2.11017	1	1	no
TSHB	chr1:115572414-115576941	0	0	0	1	1	no	0	0	0	1	1	no	0	0	0	1	1	no
TSPAN2	chr1:115590632-115632121	0.665252	0.580933	-0.195529	0.5026	0.999863	no	0.714447	0.5328	-0.423234	0.03235	0.607561	no	0.761952	0.562873	-0.436892	0.1616	0.570248	no
NGF	chr1:115828536-115880857	0	0	0	1	1	no	0	0	0	1	1	no	0	0	0	1	1	no
VANGL1	chr1:116184573-116240845	5.77098	5.65172	-0.0301268	0.85325	0.999863	no	5.41085	5.38932	-0.00575001	0.96015	0.999462	no	4.98035	4.9082	-0.0210534	0.8975	0.987768	no
CASQ2	chr1:116242625-116311426	0	0.00666383	inf	1	1	no	0	0	0	1	1	no	0.0108312	0	-inf	1	1	no
NHLH2	chr1:116378998-116383747	0	0.0149339	inf	1	1	no	0.00635629	0.0153584	1.27277	1	1	no	0	0.0132753	inf	1	1	no
SLC22A15	chr1:116519118-116612675	18.7856	17.9214	-0.0679396	0.6748	0.999863	no	18.6347	17.0894	-0.124884	0.2748	0.999462	no	21.4711	16.4968	-0.380206	0.0177	0.141528	no
MAB21L3	chr1:116654375-116677861	1.34101	1.28134	-0.0656593	0.78135	0.999863	no	1.30886	1.15118	-0.185191	0.2714	0.999462	no	1.64313	1.38938	-0.24201	0.3242	0.770834	no
B3GALT6	chr1:1167628-1170420	18.3188	17.5085	-0.0652684	0.69015	0.999863	no	18.5125	18.8718	0.0277327	0.81295	0.999462	no	15.302	17.0711	0.157839	0.3525	0.797512	no
ATP1A1	chr1:116915794-116961244	155.097	150.899	-0.0395909	0.8028	0.999863	no	148.1	146.79	-0.0128209	0.91	0.999462	no	139.753	167.289	0.259458	0.1122	0.468276	no
ATP1A1OS	chr1:116915794-116961244	82.106	83.9057	0.0312822	0.963	0.999863	no	81.8611	79.5588	-0.0411572	0.93355	0.999462	no	79.208	91.7706	0.212385	0.7489	0.966907	no
CD58	chr1:117057155-117113715	14.3951	12.6667	-0.184539	0.32455	0.999863	no	14.0772	12.2938	-0.195432	0.14885	0.999462	no	13.401	10.3702	-0.369897	0.0594	0.325843	no
FBXO2	chr1:11708417-11723384	0.131583	0.248301	0.916115	1	1	no	0.185136	0.154314	-0.262716	1	1	no	0.112401	0.0538337	-1.06207	1	1	no
FBXO44	chr1:11708417-11723384	8.14746	8.03696	-0.0197006	0.91135	0.999863	no	9.10629	8.86059	-0.0394592	0.75715	0.999462	no	8.87669	7.57405	-0.228956	0.20915	0.646202	no
IGSF3	chr1:117117030-117210314	0.660857	0.586807	-0.171452	0.4569	0.999863	no	0.557144	0.56491	0.0199688	0.8981	0.999462	no	0.53962	0.655816	0.281346	0.25255	0.696993	no
MIR320B1	chr1:117214370-117214449	0	0	0	1	1	no	0	0	0	1	1	no	0	0	0	1	1	no
FBXO6	chr1:11724149-11734409	8.69159	8.09501	-0.102586	0.5932	0.999863	no	9.58006	8.18644	-0.226797	0.0932	0.999462	no	7.99497	6.44166	-0.31166	0.1236	0.49357	no
CD2	chr1:117297085-117311851	0.0119696	0.0125676	0.0703432	1	1	no	0	0	0	1	1	no	0.0193435	0	-inf	1	1	no
MAD2L2	chr1:11734536-11751678	74.7688	69.6304	-0.102721	0.5157	0.999863	no	82.0108	77.1363	-0.0884036	0.4374	0.999462	no	67.6186	48.976	-0.465346	0.005	0.0547678	no
PTGFRN	chr1:117452688-117532972	4.18899	3.77736	-0.149226	0.39515	0.999863	no	4.08889	3.73177	-0.131847	0.29215	0.999462	no	3.44018	3.74044	0.120725	0.50575	0.896619	no
DRAXIN	chr1:11751780-11780336	0.158179	0.1393	-0.183361	1	1	no	0.235496	0.196513	-0.261081	1	1	no	0.182966	0.0994711	-0.879229	1	1	no
CD101	chr1:117544371-117579173	0.563232	0.640532	0.185541	0.527	0.999863	no	0.539906	0.67781	0.328171	0.0966	0.999462	no	0.664341	0.788483	0.247157	0.38635	0.825666	no
MIR942	chr1:117602948-117645491	0	0	0	1	1	no	16.8118	0	-inf	1	1	no	0	0	0	1	1	no
TTF2	chr1:117602948-117645491	16.3084	16.7602	0.0394227	0.7994	0.999863	no	16.0063	15.9663	-0.00360378	0.97395	0.999462	no	17.1538	14.6254	-0.230051	0.15565	0.560824	no
TRIM45	chr1:117653676-117664411	3.90086	3.9285	0.0101895	0.9558	0.999863	no	4.12328	4.35166	0.0777723	0.5573	0.999462	no	4.98326	3.43784	-0.535587	0.00605	0.0635227	no
VTCN1	chr1:117686208-117753582	0.0175281	0	-inf	1	1	no	0	0.00602364	inf	1	1	no	0.0127621	0	-inf	1	1	no
FAM132A	chr1:1177825-1182102	0.171966	0.211483	0.298419	1	1	no	0.376955	0.426536	0.178277	0.65225	0.999462	no	0.313823	0.410075	0.385939	1	1	no
MAN1A2	chr1:117910084-118068320	4.88608	4.88755	0.000431645	0.998	0.999863	no	4.31489	4.35512	0.0133898	0.91605	0.999462	no	4.71204	4.2466	-0.150042	0.39985	0.834693	no
GDAP2	chr1:118406106-118472302	6.38345	6.48155	0.0220034	0.9171	0.999863	no	5.92614	5.67661	-0.0620654	0.7033	0.999462	no	6.39499	5.51199	-0.21437	0.34735	0.792148	no
CLCN6	chr1:11845786-11907840	13.4638	13.2183	-0.0265453	0.907	0.999863	no	14.4811	12.6916	-0.190301	0.25105	0.999462	no	15.8715	13.259	-0.259462	0.2778	0.726208	no
MTHFR	chr1:11845786-11907840	11.7678	12.2514	0.0581073	0.79065	0.999863	no	12.3095	10.8278	-0.185028	0.2454	0.999462	no	15.293	12.6544	-0.273239	0.2106	0.648217	no
NPPA	chr1:11845786-11907840	1.26542	1.19944	-0.077254	0.93345	0.999863	no	1.18715	1.33715	0.171653	0.89865	0.999462	no	1.52972	0.69612	-1.13586	0.6686	0.950875	no
NPPA-AS1	chr1:11845786-11907840	1.62419	2.16441	0.414251	0.7976	0.999863	no	1.73401	1.48127	-0.22728	0.83515	0.999462	no	2.36337	1.08836	-1.11869	0.49485	0.891865	no
SPAG17	chr1:118472371-118727848	0.0106647	0.0147497	0.467841	1	1	no	0.0129374	0.0177685	0.457781	1	1	no	0.0186981	0.0125175	-0.57894	1	1	no
WDR3	chr1:118472371-118727848	19.7841	18.4593	-0.0999929	0.5291	0.999863	no	17.7958	17.0208	-0.0642431	0.5804	0.999462	no	18.5673	20.7595	0.161009	0.31545	0.762486	no
DDX11L1	chr1:11873-29370	0	0	0	1	1	no	0	0	0	1	1	no	0	0	0	1	1	no
WASH7P	chr1:11873-29370	0.0128127	0	-inf	1	1	no	0	0.0156815	inf	1	1	no	0	0.0190075	inf	1	1	no
UBE2J2	chr1:1189291-1209234	27.5633	27.6407	0.00404561	0.98135	0.999863	no	27.9231	29.1603	0.0625445	0.5876	0.999462	no	25.2713	26.0647	0.044599	0.7851	0.97317	no
NPPB	chr1:11917520-11918992	0	0	0	1	1	no	0	0	0	1	1	no	0	0	0	1	1	no
WARS2	chr1:119573838-119683295	5.6634	5.8765	0.0532895	0.76985	0.999863	no	5.43732	5.56041	0.0322966	0.80835	0.999462	no	5.32176	5.58519	0.0697025	0.70735	0.961189	no
KIAA2013	chr1:11979644-11986485	37.5527	36.1782	-0.0537948	0.72685	0.999863	no	40.3602	42.3231	0.0685119	0.53995	0.999462	no	37.9701	38.9451	0.0365771	0.81775	0.979396	no
HAO2	chr1:119911401-119936751	0	0	0	1	1	no	0.0112544	0.00891833	-0.335643	1	1	no	0	0	0	1	1	no
PLOD1	chr1:11994723-12035599	34.9877	35.4731	0.0198751	0.8958	0.999863	no	36.4219	38.915	0.0955204	0.39715	0.999462	no	42.7904	39.2742	-0.123704	0.4377	0.85985	no
HSD3B2	chr1:119957553-119965662	0.0212973	0	-inf	1	1	no	0.0174416	0	-inf	1	1	no	0.0163651	0.0560948	1.77724	1	1	no
HSD3B1	chr1:120049825-120057681	0.0142138	0.0273628	0.94492	1	1	no	0	0.0404108	inf	1	1	no	0.0173234	0.038157	1.13922	1	1	no
HSD3BP4	chr1:120106502-120115199	0.0402913	0.0650776	0.691692	1	1	no	0.0380674	0.0456672	0.262601	1	1	no	0.0259985	0.0706492	1.44225	1	1	no
LINC00622	chr1:120140324-120141914	0.360977	0.341593	-0.0796303	1	1	no	0.387983	0.328336	-0.240817	0.4667	0.999462	no	0.218491	0.456047	1.06161	1	1	no
ZNF697	chr1:120161999-120190390	2.42052	2.29281	-0.0782019	0.6933	0.999863	no	2.23912	2.04222	-0.132788	0.33465	0.999462	no	2.06467	1.88112	-0.134321	0.5106	0.898112	no
PHGDH	chr1:120254418-120286849	70.5717	71.763	0.0241497	0.8741	0.999863	no	76.3412	79.0706	0.0506801	0.65325	0.999462	no	67.9605	82.0232	0.271334	0.09245	0.422871	no
HMGCS2	chr1:120290618-120311555	0	0	0	1	1	no	0	0	0	1	1	no	0	0	0	1	1	no
REG4	chr1:120336640-120354203	0	0	0	1	1	no	0	0	0	1	1	no	0	0	0	1	1	no
NBPF7	chr1:120377387-120387779	0.682873	1.03938	0.606029	0.06305	0.999863	no	0.849955	0.781047	-0.121977	0.5702	0.999462	no	1.24398	0.939404	-0.405147	0.2031	0.635983	no
ADAM30	chr1:120436155-120439147	0	0	0	1	1	no	0	0	0	1	1	no	0	0	0	1	1	no
NOTCH2	chr1:120454175-120612317	25.3972	27.2794	0.103139	0.4992	0.999863	no	22.6801	27.6494	0.285821	0.0107	0.299642	no	25.1225	30.3003	0.270349	0.0836	0.395992	no
MIIP	chr1:12079298-12092106	26.9459	25.8781	-0.0583331	0.7192	0.999863	no	29.2866	26.1312	-0.164466	0.16315	0.999462	no	24.6941	23.3717	-0.0794012	0.6412	0.945841	no
FAM72B	chr1:120839004-120855681	4.86483	4.63471	-0.0699073	0.7251	0.999863	no	4.72184	4.21272	-0.164597	0.24165	0.999462	no	4.8865	4.20403	-0.217028	0.2852	0.733977	no
HIST2H2BA	chr1:120906033-120914842	3.99758	3.59371	-0.153654	0.64195	0.999863	no	3.80249	4.30794	0.180054	0.404	0.999462	no	3.58876	3.75035	0.0635399	0.8688	0.985156	no
FCGR1B	chr1:120926127-120935944	9.87796	9.05201	-0.125975	0.5063	0.999863	no	10.222	8.22106	-0.314276	0.0209	0.465461	no	8.99758	7.94611	-0.17929	0.362	0.805399	no
TNFRSF8	chr1:12123433-12204264	0.0921312	0.0732708	-0.330452	1	1	no	0.118042	0.137635	0.221546	1	1	no	0.0683537	0.0763596	0.15979	1	1	no
EMBP1	chr1:121260909-121313686	9.47702	8.30639	-0.190211	0.2523	0.999863	no	8.72044	8.3702	-0.0591394	0.6277	0.999462	no	9.96655	7.5069	-0.408878	0.01905	0.149013	no
SCNN1D	chr1:1215815-1227409	1.52555	1.88263	0.303423	0.1759	0.999863	no	2.2589	2.30778	0.0308862	0.83665	0.999462	no	2.03057	1.79932	-0.174438	0.4515	0.867918	no
MIR4632	chr1:12227059-12269277	75.9217	0	-inf	0.23335	0.999863	no	0	0	0	1	1	no	0	0	0	1	1	no
TNFRSF1B	chr1:12227059-12269277	41.457	42.3771	0.0316702	0.83485	0.999863	no	47.9336	46.6131	-0.0403021	0.71755	0.999462	no	50.0528	40.9565	-0.289357	0.0661	0.346746	no
ACAP3	chr1:1227763-1243269	15.4657	15.6573	0.0177685	0.9126	0.999863	no	17.384	17.4716	0.00724848	0.9528	0.999462	no	15.6761	14.5426	-0.108277	0.50965	0.897931	no
VPS13D	chr1:12290112-12572098	2.37311	2.3614	-0.00713695	0.9668	0.999863	no	2.21728	2.27474	0.0369097	0.7596	0.999462	no	2.53166	2.41637	-0.0672447	0.6849	0.954576	no
CPSF3L	chr1:1243993-1260067	40.7054	41.1902	0.0170825	0.9192	0.999863	no	44.9564	46.4707	0.0477942	0.70105	0.999462	no	40.631	46.8257	0.20472	0.2361	0.683905	no
PUSL1	chr1:1243993-1260067	15.5421	14.5711	-0.0930629	0.8135	0.999863	no	16.5229	15.9915	-0.047161	0.87495	0.999462	no	13.7007	14.2085	0.0525035	0.90945	0.988754	no
GLTPD1	chr1:1260142-1264276	11.5335	10.0459	-0.199225	0.2593	0.999863	no	11.2644	11.6605	0.0498594	0.6938	0.999462	no	9.80029	10.2161	0.0599451	0.7306	0.963643	no
TAS1R3	chr1:1266725-1269844	0.233571	0.243826	0.0619946	1	1	no	0.253895	0.268867	0.0826602	1	1	no	0.204168	0.299961	0.555015	1	1	no
AADACL4	chr1:12704565-12727097	0	0.0122184	inf	1	1	no	0	0	0	1	1	no	0	0	0	1	1	no
DVL1	chr1:1270657-1284492	19.4285	18.602	-0.062712	0.70035	0.999863	no	21.6594	21.2351	-0.0285435	0.8021	0.999462	no	19.5728	18.3423	-0.0936698	0.56525	0.921043	no
AADACL3	chr1:12776117-12788726	0	0	0	1	1	no	0.00294838	0.0033069	0.165554	1	1	no	0	0	0	1	1	no
C1orf158	chr1:12806162-12821102	0	0	0	1	1	no	0	0	0	1	1	no	0	0	0	1	1	no
PRAMEF12	chr1:12834983-12838048	0	0	0	1	1	no	0	0	0	1	1	no	0	0	0	1	1	no
PRAMEF1	chr1:12851545-12856777	0	0	0	1	1	no	0	0	0	1	1	no	0	0	0	1	1	no
MXRA8	chr1:1288070-1293915	2.69421	2.78572	0.048185	0.82315	0.999863	no	3.14109	3.30141	0.0718203	0.6293	0.999462	no	3.16353	2.20406	-0.521374	0.02505	0.183071	no
PRAMEF11	chr1:12884467-12891264	0	0	0	1	1	no	0	0	0	1	1	no	0	0	0	1	1	no
HNRNPCL1,LOC649330	chr1:12907235-12908578	1.37038e-05	2.41966e-06	-2.5017	1	1	no	3.80201e-05	0.0124144	8.35104	1	1	no	1.58633e-05	2.22259e-05	0.486545	1	1	no
LOC649330	chr1:12907235-12908578	0.0198888	0.055897	1.49082	1	1	no	0.10324	0.136005	0.397665	1	1	no	0.030027	0.0978405	1.70417	1	1	no
PRAMEF2	chr1:12916940-12921764	0	0	0	1	1	no	0	0	0	1	1	no	0	0	0	1	1	no
PRAMEF4	chr1:12939032-12946025	0	0	0	1	1	no	0	0	0	1	1	no	0	0	0	1	1	no
PRAMEF10	chr1:12952726-12958094	0	0.0297559	inf	1	1	no	0	0	0	1	1	no	0	0.0189045	inf	1	1	no
AURKAIP1	chr1:1309109-1310818	109.655	109.891	0.00310411	0.9832	0.999863	no	120.078	118.636	-0.0174274	0.8815	0.999462	no	99.8776	120.22	0.267439	0.1046	0.453289	no
LOC440563	chr1:13182959-13184326	0.0166626	0.0574774	1.78639	1	1	no	0.0109493	0.012464	0.186927	1	1	no	0.026421	0	-inf	1	1	no
CCNL2	chr1:1321090-1334718	60.271	62.1125	0.0434212	0.8074	0.999863	no	68.9933	67.0157	-0.0419575	0.74985	0.999462	no	67.9194	64.8738	-0.0661877	0.7118	0.961798	no
PRAMEF22,PRAMEF3	chr1:13328195-13331692	0	0	0	1	1	no	0	0	0	1	1	no	0	0	0	1	1	no
PRAMEF3	chr1:13328195-13331692	0	0	0	1	1	no	0	0	0	1	1	no	0	0	0	1	1	no
LOC148413	chr1:1334909-1342693	12.2582	13.9975	0.191425	0.5589	0.999863	no	13.7976	13.5193	-0.0293982	0.9041	0.999462	no	11.665	15.2256	0.384313	0.23145	0.677754	no
MRPL20	chr1:1334909-1342693	109.572	104.698	-0.0656467	0.72075	0.999863	no	116.387	103.115	-0.17468	0.21045	0.999462	no	97.1007	105.415	0.118528	0.53445	0.910151	no
PRAMEF5,PRAMEF6	chr1:13359818-13369057	0	0	0	1	1	no	0	0	0	1	1	no	0	0	0	1	1	no
PRAMEF6	chr1:13359818-13369057	0	0	0	1	1	no	0.00845604	0	-inf	1	1	no	0	0	0	1	1	no
PRAMEF13	chr1:13447413-13452656	0	0	0	1	1	no	0	0	0	1	1	no	0	0	0	1	1	no
LOC729737	chr1:134772-140566	1.5693	1.53847	-0.028628	0.8888	0.999863	no	1.9025	1.8268	-0.0585771	0.68035	0.999462	no	2.16351	2.43293	0.169319	0.38045	0.82207	no
PRAMEF16	chr1:13495253-13498259	0	0	0	1	1	no	0	0	0	1	1	no	0	0	0	1	1	no
ANKRD65	chr1:1353799-1356824	0.0909059	0.0963799	0.0843584	1	1	no	0.0747522	0.100802	0.431335	1	1	no	0.159294	0.161963	0.0239733	1	1	no
PRAMEF7,PRAMEF8	chr1:13607430-13611550	0	0	0	1	1	no	0	0	0	1	1	no	0	0	0	1	1	no
PRAMEF8	chr1:13607430-13611550	0	0	0	1	1	no	0	0	0	1	1	no	0	0	0	1	1	no
TMEM88B	chr1:1361507-1363167	0	0	0	1	1	no	0	0	0	1	1	no	0	0	0	1	1	no
PRAMEF15,PRAMEF9	chr1:13641972-13648988	0	0	0	1	1	no	0	0	0	1	1	no	0	0	0	1	1	no
PRAMEF9	chr1:13641972-13648988	0	0	0	1	1	no	0	0	0	1	1	no	0	0	0	1	1	no
PRAMEF14	chr1:13668268-13673511	0	0	0	1	1	no	0	0	0	1	1	no	0	0	0	1	1	no
PRAMEF18	chr1:13694888-13698405	0	0	0	1	1	no	0	0	0	1	1	no	0	0	0	1	1	no
VWA1	chr1:1370902-1378262	0.370019	0.44084	0.252656	0.3781	0.999863	no	0.426901	0.552662	0.372496	0.04795	0.763636	no	0.25638	0.486282	0.923512	1	1	no
PRAMEF17	chr1:13716087-13719064	0	0	0	1	1	no	0	0	0	1	1	no	0	0	0	1	1	no
PRAMEF20,PRAMEF21	chr1:13736906-13747803	0	0	0	1	1	no	0	0	0	1	1	no	0	0	0	1	1	no
PRAMEF21	chr1:13736906-13747803	0	0	0	1	1	no	0	0	0	1	1	no	0	0	0	1	1	no
LRRC38	chr1:13801444-13840242	0	0.00952457	inf	1	1	no	0	0	0	1	1	no	0	0.0169931	inf	1	1	no
ATAD3C	chr1:1385068-1405538	0.320325	0.398936	0.31662	0.3244	0.999863	no	0.388593	0.412014	0.0844337	0.6904	0.999462	no	0.372188	0.395019	0.085891	1	1	no
PRDM2	chr1:14026734-14151574	10.5403	11.1192	0.0771368	0.66315	0.999863	no	9.96608	10.2165	0.0358085	0.7833	0.999462	no	9.97093	11.2771	0.177595	0.3191	0.766419	no
ATAD3B	chr1:1407163-1431582	7.33882	7.12125	-0.0434183	0.80775	0.999863	no	8.43532	7.39984	-0.188949	0.1486	0.999462	no	7.07067	8.87032	0.327139	0.07445	0.370247	no
ANKRD20A12P	chr1:142697420-142713605	0.87855	1.00619	0.195706	0.5332	0.999863	no	1.01841	0.716224	-0.507838	0.0195	0.446228	no	0.871632	0.837026	-0.0584453	0.8694	0.985156	no
LOC100130000	chr1:143687129-143714180	1.33151	1.38338	0.0551341	0.8422	0.999863	no	1.31129	1.52512	0.217937	0.2529	0.999462	no	1.88907	1.367	-0.466664	0.10885	0.462621	no
LOC100286793	chr1:143718512-143744587	0.193992	0.21972	0.179668	1	1	no	0.192157	0.232188	0.273007	1	1	no	0.457576	0.204418	-1.16249	1	1	no
PPIAL4G	chr1:143767143-143767881	0.20619	0.182897	-0.172941	1	1	no	0.491037	0.374026	-0.392693	0.4477	0.999462	no	0.390586	0.371794	-0.0711379	1	1	no
FAM72D	chr1:143896451-143913143	7.61644	7.87211	0.0476341	0.79365	0.999863	no	7.72048	6.92615	-0.156637	0.2283	0.999462	no	8.16127	6.74328	-0.275344	0.1418	0.532519	no
LOC728875	chr1:144480745-144521969	0	0	0	1	1	no	0	0.0408913	inf	1	1	no	0	0	0	1	1	no
PFN1P2	chr1:144610814-144612727	1.84431	2.10896	0.193452	0.4492	0.999863	no	2.23032	2.29255	0.0397049	0.81065	0.999462	no	2.82192	2.24249	-0.331576	0.1879	0.612645	no
LOC653513	chr1:144614958-144828810	0	0	0	1	1	no	0	0.0168525	inf	1	1	no	0.0400185	0.0451243	0.173237	1	1	no
NBPF9	chr1:144614958-144828810	1.37952	1.47425	0.095807	0.68725	0.999863	no	1.40679	1.59954	0.185247	0.2546	0.999462	no	1.77541	1.51049	-0.233134	0.33695	0.781987	no
ATAD3A	chr1:1447522-1470067	12.8296	12.3866	-0.0506897	0.7659	0.999863	no	13.5988	13.4039	-0.0208277	0.86365	0.999462	no	11.0469	13.4485	0.283794	0.1029	0.449338	no
SEC22B	chr1:145096406-145116997	60.437	60.8371	0.00952054	0.95085	0.999863	no	55.5503	56.8894	0.0343637	0.7612	0.999462	no	58.1035	57.731	-0.0092773	0.95505	0.993672	no
NOTCH2NL	chr1:145209110-145285912	3.86534	4.29859	0.153268	0.393	0.999863	no	4.03629	4.30172	0.0918849	0.47055	0.999462	no	4.41421	4.04205	-0.127069	0.4842	0.886409	no
NBPF10	chr1:145293370-145368684	1.3857	1.80041	0.377712	0.0389	0.999863	no	1.39719	1.71807	0.298262	0.0227	0.487137	no	1.62647	1.73806	0.0957368	0.60115	0.932358	no
HFE2	chr1:145413190-145417545	0.12125	0.14879	0.295284	1	1	no	0.105111	0.148439	0.497956	1	1	no	0.0811257	0.294038	1.85777	1	1	no
TXNIP	chr1:145438461-145442628	390.876	431.409	0.142346	0.37315	0.999863	no	339.489	400.838	0.239653	0.03775	0.663181	no	356.691	339.972	-0.0692585	0.6787	0.952912	no
POLR3GL	chr1:145456235-145470387	33.8678	37.4562	0.145293	0.3851	0.999863	no	38.5078	39.7358	0.0452891	0.70175	0.999462	no	35.1035	35.9626	0.0348838	0.8423	0.98347	no
ANKRD34A	chr1:145470507-145475647	0.194668	0.217155	0.157712	1	1	no	0.194492	0.260874	0.423646	1	1	no	0.345033	0.12995	-1.40878	1	1	no
LIX1L	chr1:145477084-145499091	15.2554	13.0002	-0.230789	0.2082	0.999863	no	12.6172	13.2406	0.0695759	0.5995	0.999462	no	14.1227	10.2884	-0.457002	0.0165	0.134447	no
GNRHR2	chr1:145507556-145516076	6.95965	7.26801	0.0625459	0.8361	0.999863	no	6.75582	6.837	0.017234	0.93555	0.999462	no	6.38164	6.81195	0.0941406	0.757	0.967627	no
RBM8A	chr1:145507556-145516076	21.2516	21.3139	0.00422203	0.98195	0.999863	no	21.5514	20.929	-0.0422751	0.7491	0.999462	no	19.6288	19.1556	-0.0352059	0.85445	0.983534	no
PEX11B	chr1:145516164-145523732	22.7894	22.9305	0.00890344	0.95645	0.999863	no	24.4236	24.2374	-0.0110391	0.9265	0.999462	no	23.7818	24.3513	0.0341421	0.84245	0.98347	no
ITGA10	chr1:145524989-145543868	0.212279	0.20484	-0.0514601	1	1	no	0.231063	0.220787	-0.0656279	1	1	no	0.21199	0.190242	-0.156161	1	1	no
ANKRD35	chr1:145549208-145568526	4.26746	4.21954	-0.0162906	0.93045	0.999863	no	4.36623	5.16565	0.242563	0.0682	0.914677	no	4.46065	5.31729	0.253438	0.17925	0.598293	no
NUDT17	chr1:145575987-145589435	4.10568	4.47522	0.124337	0.82475	0.999863	no	4.18673	4.13524	-0.0178524	0.9665	0.999462	no	4.27024	3.9046	-0.12914	0.82075	0.979601	no
PIAS3	chr1:145575987-145589435	15.1929	15.5455	0.0331014	0.84835	0.999863	no	15.4417	14.8865	-0.0528305	0.6744	0.999462	no	16.7571	12.8409	-0.384018	0.02855	0.199587	no
POLR3C	chr1:145592604-145610884	26.7308	27.0428	0.0167401	0.9182	0.999863	no	27.5429	28.7149	0.0601199	0.60525	0.999462	no	25.9115	26.3348	0.0233822	0.8904	0.987625	no
RNF115	chr1:145611035-145688776	17.1923	17.8261	0.0522324	0.76435	0.999863	no	16.3202	17.45	0.0965665	0.43595	0.999462	no	17.0053	15.4353	-0.139749	0.4312	0.857075	no
CD160	chr1:145695797-145715565	0.325958	0.309049	-0.0768466	1	1	no	0.288607	0.280973	-0.0386721	1	1	no	0.336607	0.374219	0.152819	1	1	no
PDZK1	chr1:145727665-145764206	0.140562	0.111459	-0.334697	1	1	no	0.0991321	0.142608	0.524635	1	1	no	0.133116	0.116675	-0.190193	1	1	no
GPR89A	chr1:145764594-145827103	1.15078	1.27688	0.15	0.58815	0.999863	no	1.36731	1.2274	-0.15574	0.3915	0.999462	no	1.23122	1.34215	0.124462	0.6634	0.950735	no
LOC728989	chr1:146490894-146514599	0.142012	0.234394	0.722925	1	1	no	0.156874	0.338954	1.11148	1	1	no	0.210243	0.380728	0.856704	1	1	no
PRKAB2	chr1:146626684-146644129	6.42407	6.22138	-0.0462536	0.7882	0.999863	no	6.7481	6.45855	-0.0632704	0.6009	0.999462	no	7.40514	6.22455	-0.250558	0.1432	0.536304	no
PDIA3P	chr1:146649429-146651528	3.62706	4.02584	0.150491	0.4742	0.999863	no	3.90539	3.71933	-0.0704225	0.62845	0.999462	no	3.1735	3.91224	0.301919	0.1773	0.595542	no
FMO5	chr1:146655883-146697230	7.81023	7.38455	-0.0808559	0.66215	0.999863	no	7.5595	8.60484	0.186857	0.1607	0.999462	no	9.28778	7.90403	-0.232746	0.2106	0.648217	no
CHD1L	chr1:146714290-146767447	71.7988	70.1579	-0.0333537	0.8337	0.999863	no	72.2903	67.4349	-0.100306	0.3912	0.999462	no	73.9151	68.1851	-0.116413	0.459	0.873255	no
LINC00624	chr1:146853913-146989699	0	0.0071372	inf	1	1	no	0.00408123	0.00373187	-0.129106	1	1	no	0	0	0	1	1	no
BCL9	chr1:147013181-147098015	1.14176	1.03442	-0.142439	0.5099	0.999863	no	1.07857	1.01929	-0.081552	0.58475	0.999462	no	0.899349	0.691147	-0.379888	0.1112	0.467018	no
TMEM240	chr1:1470157-1475740	0.185421	0.200452	0.11245	1	1	no	0.136554	0.152096	0.155514	1	1	no	0.184437	0.167616	-0.13797	1	1	no
ACP6	chr1:147119167-147142634	2.84045	3.1215	0.13612	0.56	0.999863	no	2.91205	3.23279	0.150744	0.33705	0.999462	no	3.35198	2.55108	-0.393906	0.11025	0.465238	no
GJA5	chr1:147228331-147245484	0	0.0055782	inf	1	1	no	0	0.00821342	inf	1	1	no	0	0	0	1	1	no
GJA8	chr1:147374945-147381395	0	0	0	1	1	no	0	0	0	1	1	no	0	0	0	1	1	no
GPR89B	chr1:147400505-147465755	0.318586	0.292102	-0.125209	1	1	no	0.287605	0.251844	-0.191558	1	1	no	0.385282	0.219848	-0.80941	1	1	no
GPR89C	chr1:147400505-147465755	0	0	0	1	1	no	0	0	0	1	1	no	0	0	0	1	1	no
PDZK1P1	chr1:147466093-147484331	0	0	0	1	1	no	0	0	0	1	1	no	0	0	0	1	1	no
NBPF11	chr1:147574322-147624601	8.31775e-07	7.96258e-07	-0.062958	1	1	no	1.20282e-06	1.62959e-06	0.438094	1	1	no	1.18841e-06	1.27167e-06	0.0976916	1	1	no
NBPF24	chr1:147574322-147624601	0.00370825	0.00379272	0.0324931	1	1	no	0.0123995	0.0159666	0.36477	1	1	no	0.00559641	0.026966	2.26857	1	1	no
SSU72	chr1:1477052-1510262	63.743	63.8793	0.0030808	0.9844	0.999863	no	67.9633	68.5741	0.0129089	0.90895	0.999462	no	60.7646	68.936	0.182027	0.26125	0.707055	no
MIR5087	chr1:147806602-147806678	0	0	0	1	1	no	32.5334	0	-inf	1	1	no	0	0	0	1	1	no
FLJ39739	chr1:147906021-147931980	0	0	0	1	1	no	0	0	0	1	1	no	0	0	0	1	1	no
PPIAL4B	chr1:147954634-147955419	0	0	0	1	1	no	0	0	0	1	1	no	0	0	0	1	1	no
NBPF14	chr1:148003641-148025848	3.07863	3.4385	0.159489	0.41075	0.999863	no	3.11385	3.13172	0.00825163	0.95255	0.999462	no	3.72605	3.66737	-0.0229034	0.90315	0.987945	no
NBPF15,NBPF16	chr1:148558187-148596267	2.40861	2.59223	0.105992	0.58025	0.999863	no	2.59466	2.74926	0.0834995	0.5401	0.999462	no	2.71691	2.8415	0.064689	0.7431	0.96681	no
PPIAL4E	chr1:148644010-148644795	0	0	0	1	1	no	0	0	0	1	1	no	0	0	0	1	1	no
NBPF16	chr1:148739441-148758311	0	0	0	1	1	no	0	0	0	1	1	no	0	0	0	1	1	no
PPIAL4F	chr1:148806014-148806799	0	0	0	1	1	no	0	0	0	1	1	no	0	0	0	1	1	no
LOC645166	chr1:148928285-148953054	1.58284	2.39391	0.596858	0.10925	0.999863	no	2.55699	2.83238	0.147566	0.5378	0.999462	no	2.53474	2.77484	0.130565	0.738	0.966306	no
KAZN	chr1:14925212-15478960	0.873943	0.753379	-0.214165	0.44505	0.999863	no	0.815827	0.739657	-0.141406	0.46375	0.999462	no	0.823989	0.94311	0.194801	0.51925	0.903656	no
TMEM51-AS1	chr1:14925212-15478960	0.109939	0.134713	0.293188	1	1	no	0.0931485	0.0878267	-0.0848743	1	1	no	0.135169	0.0716052	-0.916623	1	1	no
LOC388692	chr1:149279475-149291742	2.17288	2.09999	-0.0492283	0.77395	0.999863	no	2.52355	2.38922	-0.0789148	0.5284	0.999462	no	2.92984	2.38932	-0.294218	0.09105	0.418426	no
FCGR1C	chr1:149369293-149378297	1.83248	1.46785	-0.32009	0.27265	0.999863	no	2.23913	1.6535	-0.437415	0.02205	0.481965	no	1.90542	1.78824	-0.0915663	0.76255	0.968158	no
PPIAL4A,PPIAL4C	chr1:149553002-149553787	0	0	0	1	1	no	0	0	0	1	1	no	0	0	0	1	1	no
PPIAL4C	chr1:149553002-149553787	0	0	0	1	1	no	0	0	0	1	1	no	0	0	0	1	1	no
FAM91A2	chr1:149576261-149672733	2.14951	1.91535	-0.166401	0.56945	0.999863	no	2.1071	2.28872	0.11928	0.5269	0.999462	no	2.46193	1.62467	-0.599639	0.0553	0.311341	no
LINC00623	chr1:149576261-149672733	0	0	0	1	1	no	0	0	0	1	1	no	0	0	0	1	1	no
FCGR1A	chr1:149754244-149783928	10.9696	10.4957	-0.0637071	0.73255	0.999863	no	10.7132	9.3431	-0.197418	0.16215	0.999462	no	9.43828	8.87406	-0.0889284	0.6424	0.945997	no
HIST2H2BF	chr1:149754244-149783928	5.97905	7.08086	0.244007	0.69105	0.999863	no	8.2239	6.93881	-0.245135	0.6156	0.999462	no	7.70584	6.26792	-0.297965	0.6009	0.932076	no
HIST2H3D	chr1:149784779-149785236	10.8541	9.62087	-0.173995	0.51155	0.999863	no	9.65788	10.4829	0.118255	0.51485	0.999462	no	10.3198	10.2032	-0.0163993	0.9441	0.99155	no
HIST2H4A	chr1:149804220-149804616	0	0	0	1	1	no	0	0	0	1	1	no	0	0	0	1	1	no
HIST2H3A	chr1:149812258-149812765	0	0	0	1	1	no	0	0	0	1	1	no	0	0	0	1	1	no
HIST2H2BC	chr1:149821758-149822340	4.6172	3.36143	-0.457945	0.1422	0.999863	no	4.26235	4.80982	0.174334	0.3915	0.999462	no	4.84378	4.25713	-0.18625	0.568	0.921966	no
HIST2H2AA4	chr1:149822627-149823161	0	0	0	1	1	no	0	0	0	1	1	no	0	0	0	1	1	no
HIST2H3C	chr1:149824180-149824687	0	0	0	1	1	no	0	0	0	1	1	no	0	0	0	1	1	no
HIST2H4B	chr1:149832329-149832725	0	0	0	1	1	no	0	0	0	1	1	no	0	0	0	1	1	no
HIST2H2BE	chr1:149856009-149858232	1.5828	1.83526	0.213505	0.39265	0.999863	no	1.71217	1.51472	-0.176774	0.30755	0.999462	no	1.74192	1.79915	0.046636	0.8528	0.983534	no
HIST2H2AC	chr1:149858524-149858961	4.30256	3.84691	-0.161495	0.656	0.999863	no	4.16797	4.71821	0.178895	0.4392	0.999462	no	2.92265	4.99688	0.773751	0.0664	0.347653	no
HIST2H2AB	chr1:149859018-149859466	0.225921	0.60874	1.43001	0.256	0.999863	no	0.314974	0.375718	0.254418	0.76505	0.999462	no	0.712125	0.340825	-1.0631	0.3683	0.811628	no
BOLA1	chr1:149871154-149872348	17.3842	15.2356	-0.190336	0.3258	0.999863	no	17.4909	17.3456	-0.0120294	0.9285	0.999462	no	16.8771	16.2869	-0.0513548	0.7952	0.975371	no
SV2A	chr1:149874871-149889434	3.57018	3.71454	0.0571886	0.75195	0.999863	no	3.4741	3.89118	0.163572	0.20995	0.999462	no	4.2264	4.54973	0.106352	0.5555	0.917423	no
SF3B4	chr1:149895208-149900144	83.766	80.0375	-0.0656887	0.67075	0.999863	no	85.8772	84.5061	-0.0232196	0.8346	0.999462	no	74.3149	76.5117	0.0420302	0.7968	0.975371	no
MTMR11	chr1:149900542-149908791	12.292	12.1386	-0.0181176	0.9146	0.999863	no	12.4345	12.2047	-0.0269221	0.82235	0.999462	no	13.0529	11.8622	-0.138	0.4238	0.851972	no
OTUD7B	chr1:149912231-149982686	3.58769	3.80641	0.0853725	0.6209	0.999863	no	3.40219	3.36361	-0.0164538	0.89815	0.999462	no	3.11011	2.61674	-0.249196	0.1785	0.597519	no
VPS45	chr1:150039341-150117505	14.7907	15.4326	0.0612957	0.71145	0.999863	no	14.7007	14.441	-0.0257137	0.83225	0.999462	no	15.3442	16.4072	0.0966377	0.566	0.921043	no
ANP32E	chr1:150190716-150208504	75.719	72.3748	-0.0651669	0.66735	0.999863	no	71.6252	68.8442	-0.0571327	0.6071	0.999462	no	72.1489	64.6762	-0.157743	0.31395	0.760998	no
CA14	chr1:150230217-150237480	0.0983939	0.144413	0.553558	1	1	no	0.105554	0.111674	0.0813068	1	1	no	0.146988	0.150206	0.0312432	1	1	no
APH1A	chr1:150237798-150241609	133.003	132.627	-0.00408295	0.9791	0.999863	no	133.446	136.648	0.0342006	0.76055	0.999462	no	126.465	146.1	0.208221	0.19035	0.616082	no
C1orf54	chr1:150245182-150253335	99.2839	105.933	0.0935236	0.58215	0.999863	no	117.455	119.056	0.0195365	0.86915	0.999462	no	110.526	136.478	0.30428	0.075	0.372306	no
C1orf51	chr1:150255228-150259501	5.26504	6.28349	0.255121	0.20855	0.999863	no	5.92325	6.82223	0.203855	0.1452	0.999462	no	6.79264	9.19005	0.436101	0.02855	0.199587	no
MRPS21	chr1:150266268-150280819	192.486	185.86	-0.0505359	0.758	0.999863	no	205.254	205.168	-0.000602777	0.99625	0.999462	no	189.55	219.891	0.214209	0.21075	0.648217	no
PRPF3	chr1:150293927-150325704	57.3778	60.6819	0.0807746	0.6001	0.999863	no	60.1408	59.0318	-0.0268504	0.81145	0.999462	no	61.7779	58.5132	-0.0783294	0.62795	0.941966	no
TARS2	chr1:150459839-150480085	16.9799	17.3199	0.0286002	0.8575	0.999863	no	17.8808	18.808	0.0729305	0.5418	0.999462	no	16.8724	17.7727	0.0749918	0.655	0.949772	no
ECM1	chr1:150480486-150486265	95.1861	93.7518	-0.0219046	0.88705	0.999863	no	93.7625	100.66	0.102414	0.3553	0.999462	no	96.7236	82.8735	-0.222957	0.15525	0.560416	no
LINC00568	chr1:150488232-150490508	0.972991	1.13256	0.219088	0.66395	0.999863	no	1.11425	0.950793	-0.228865	0.54575	0.999462	no	1.0334	1.15097	0.155452	0.78985	0.974825	no
ADAMTSL4	chr1:150521897-150533412	19.3243	20.979	0.118528	0.45875	0.999863	no	20.9269	22.5994	0.110926	0.3336	0.999462	no	22.4067	25.9205	0.210168	0.1895	0.61464	no
MIR4257	chr1:150521897-150533412	39.9196	66.3119	0.732172	0.74225	0.999863	no	15.5317	86.0786	2.47044	0.4056	0.999462	no	144.67	68.1528	-1.08592	0.6285	0.942086	no
ENSA	chr1:150594598-150602098	280.763	298.323	0.0875196	0.5856	0.999863	no	287.391	286.097	-0.00651322	0.95735	0.999462	no	281.809	275.656	-0.0318488	0.84895	0.98347	no
GOLPH3L	chr1:150618700-150669672	17.1481	16.159	-0.0857114	0.6002	0.999863	no	15.1767	16.1561	0.090223	0.45005	0.999462	no	15.8182	14.307	-0.144869	0.3925	0.830209	no
HORMAD1	chr1:150670534-150693364	0.0819999	0.133726	0.705585	1	1	no	0.0790858	0.103858	0.393117	1	1	no	0.107944	0.120001	0.152768	1	1	no
CTSS	chr1:150702671-150738433	53.5788	51.4288	-0.0590839	0.7038	0.999863	no	50.6687	49.985	-0.0195982	0.8634	0.999462	no	55.6383	57.6469	0.0511642	0.7465	0.966907	no
CTSK	chr1:150768683-150780917	8.95997	8.83138	-0.0208541	0.9065	0.999863	no	9.53603	8.23424	-0.211754	0.11135	0.999462	no	8.60391	7.14186	-0.268692	0.16605	0.576782	no
ARNT	chr1:150782180-150849244	40.6488	40.8534	0.00724578	0.96185	0.999863	no	39.9273	38.196	-0.0639513	0.5694	0.999462	no	39.4943	34.4887	-0.19552	0.21115	0.648573	no
SETDB1	chr1:150898814-150937220	36.7001	37.3751	0.026293	0.86495	0.999863	no	37.4277	38.4248	0.0379296	0.7377	0.999462	no	37.6513	36.0596	-0.0623155	0.6977	0.958659	no
CERS2	chr1:150937648-150947479	107.324	107.666	0.00460185	0.97635	0.999863	no	105.091	109.85	0.063895	0.5752	0.999462	no	99.6888	104.977	0.0745724	0.6377	0.945841	no
ANXA9	chr1:150954498-150968114	2.71745	3.38537	0.31706	0.1649	0.999863	no	2.66789	2.90377	0.122226	0.44165	0.999462	no	3.02373	3.26668	0.111496	0.64055	0.945841	no
FAM63A	chr1:150969300-150980854	10.5948	11.63	0.134498	0.4511	0.999863	no	10.9541	11.9027	0.11982	0.34035	0.999462	no	11.0582	11.2485	0.0246141	0.88965	0.987625	no
PRUNE	chr1:150980972-151008189	10.4696	10.2173	-0.0352014	0.8367	0.999863	no	10.1877	10.5773	0.0541341	0.65735	0.999462	no	9.98036	9.35682	-0.0930732	0.59885	0.931749	no
BNIPL	chr1:151009028-151020076	0.735873	0.72401	-0.0234478	0.938	0.999863	no	0.818773	0.878196	0.101079	0.61175	0.999462	no	0.639912	0.83698	0.387321	0.2502	0.694578	no
C1orf56	chr1:151020258-151032125	0.937625	0.921728	-0.0246702	0.86335	0.999863	no	1.05328	0.984354	-0.0976467	0.82615	0.999462	no	0.841266	1.11368	0.404699	0.77485	0.97049	no
CDC42SE1	chr1:151020258-151032125	87.3946	89.0117	0.0264519	0.86565	0.999863	no	91.2	86.0999	-0.0830222	0.4542	0.999462	no	88.1674	86.2391	-0.0319033	0.83905	0.982433	no
MLLT11	chr1:151032150-151040973	0.733766	0.595142	-0.302086	0.35535	0.999863	no	0.671711	0.632936	-0.0857817	0.685	0.999462	no	0.693687	0.505417	-0.456809	0.2128	0.651447	no
GABPB2	chr1:151043079-151091007	9.00201	9.99403	0.150819	0.4124	0.999863	no	9.21813	9.80209	0.0886153	0.49795	0.999462	no	10.0411	8.18944	-0.294081	0.11125	0.467018	no
SEMA6C	chr1:151104162-151119140	0.893317	0.89418	0.00139241	0.9879	0.999863	no	0.848077	1.08113	0.350278	0.0359	0.646749	no	0.867159	0.678841	-0.353222	0.19755	0.627509	no
LYSMD1	chr1:151129104-151148547	2.41417	2.65765	0.138627	0.89595	0.999863	no	2.18593	2.55412	0.22458	0.75495	0.999462	no	2.36206	2.25214	-0.0687517	0.9511	0.992979	no
SCNM1	chr1:151129104-151148547	20.4169	20.3109	-0.00751209	0.9839	0.999863	no	21.0117	21.4745	0.0314298	0.8954	0.999462	no	20.008	20.6306	0.0442123	0.90005	0.987768	no
TMOD4	chr1:151129104-151148547	1.4944	1.46323	-0.0304081	0.9621	0.999863	no	1.27497	1.51413	0.248019	0.86255	0.999462	no	1.6402	1.77367	0.112868	0.9263	0.989769	no
TNFAIP8L2	chr1:151129104-151148547	65.8014	63.8201	-0.0441074	0.8643	0.999863	no	65.5886	65.4529	-0.0029869	0.9864	0.999462	no	59.605	57.4784	-0.0524138	0.84875	0.98347	no
TNFAIP8L2-SCNM1	chr1:151129104-151148547	29.3818	30.5397	0.0557626	0.8429	0.999863	no	30.5095	29.3121	-0.0577635	0.77575	0.999462	no	26.9216	31.8268	0.241477	0.40145	0.835125	no
VPS72	chr1:151148775-151162689	48.1724	50.304	0.0624664	0.6927	0.999863	no	50.9463	52.2663	0.0369032	0.7467	0.999462	no	48.3974	47.045	-0.0408885	0.8062	0.978047	no
PIP5K1A	chr1:151171020-151222007	8.24332	8.14206	-0.0178329	0.91705	0.999863	no	8.43616	8.11327	-0.0563037	0.64365	0.999462	no	7.79018	9.55086	0.293973	0.09065	0.417098	no
PSMD4	chr1:151227196-151239954	136.462	141.212	0.0493633	0.7494	0.999863	no	149.057	151.631	0.0247073	0.8217	0.999462	no	133.022	149.27	0.166259	0.29135	0.740927	no
PI4KB	chr1:151254790-151300191	30.1495	30.3937	0.0116402	0.9549	0.999863	no	31.3218	30.876	-0.0206802	0.90185	0.999462	no	27.3102	30.1003	0.140339	0.50745	0.897805	no
ZNF687	chr1:151254790-151300191	17.8092	17.897	0.00709711	0.97675	0.999863	no	17.2645	18.7873	0.12195	0.51125	0.999462	no	17.1669	17.9017	0.0604687	0.8073	0.978047	no
RFX5	chr1:151313115-151319769	35.9613	35.1341	-0.0335746	0.825	0.999863	no	34.8773	34.4608	-0.0173313	0.87935	0.999462	no	35.2761	34.759	-0.0213037	0.8911	0.987625	no
SELENBP1	chr1:151336777-151345210	0.32009	0.200179	-0.677189	1	1	no	0.230349	0.374266	0.700245	0.0516	0.797516	no	0.317638	0.32553	0.0354063	1	1	no
PSMB4	chr1:151372040-151374412	285.318	284.966	-0.0017796	0.9923	0.999863	no	294.495	290.478	-0.0198152	0.85805	0.999462	no	277.336	302.427	0.124952	0.4228	0.851262	no
POGZ	chr1:151375199-151431941	26.1839	26.3584	0.00958002	0.9492	0.999863	no	26.183	25.7494	-0.024089	0.8262	0.999462	no	27.1823	23.9258	-0.184097	0.2498	0.694578	no
CGN	chr1:151483861-151511167	0.149676	0.103015	-0.538981	1	1	no	0.11913	0.132326	0.15157	1	1	no	0.182279	0.0917563	-0.990265	1	1	no
MIR554	chr1:151512780-151556059	0	0	0	1	1	no	0	0	0	1	1	no	0	0	0	1	1	no
TUFT1	chr1:151512780-151556059	1.46068	1.23718	-0.239587	0.31085	0.999863	no	1.45433	1.22521	-0.247324	0.13685	0.999462	no	1.3252	1.09877	-0.27032	0.29795	0.746931	no
SNX27	chr1:151584661-151671559	7.28718	7.45721	0.0332769	0.8389	0.999863	no	7.25664	7.45493	0.0388942	0.7398	0.999462	no	6.99551	8.39028	0.262289	0.1111	0.467018	no
CELF3	chr1:151672533-151689290	0.0395714	0.0212503	-0.896974	1	1	no	0.0357965	0.0470542	0.394506	1	1	no	0.0464867	0.0389912	-0.253668	1	1	no
RIIAD1	chr1:151694012-151702082	0	0	0	1	1	no	0	0	0	1	1	no	0	0	0	1	1	no
MRPL9	chr1:151732122-151743806	54.0523	53.2565	-0.0213981	0.9003	0.999863	no	55.6859	54.4328	-0.0328348	0.7886	0.999462	no	52.765	53.2425	0.0129968	0.93785	0.990236	no
OAZ3	chr1:151732122-151743806	10.418	10.4366	0.00257552	0.9949	0.999863	no	10.027	10.1218	0.0135658	0.9684	0.999462	no	9.07652	10.254	0.175982	0.7419	0.96681	no
TDRKH	chr1:151744040-151763010	4.00094	4.08517	0.0300579	0.8764	0.999863	no	3.86989	3.66957	-0.0766807	0.59315	0.999462	no	3.87512	3.21193	-0.270802	0.1945	0.6223	no
LINGO4	chr1:151772764-151777882	0	0	0	1	1	no	0	0	0	1	1	no	0	0	0	1	1	no
RORC	chr1:151778546-151804348	0.0107845	0.00557478	-0.951979	1	1	no	0.00500923	0.025919	2.37135	1	1	no	0.0165452	0.00998724	-0.728255	1	1	no
C2CD4D	chr1:151810338-151816641	0.0339055	0.0217863	-0.638096	1	1	no	0.0180374	0.029336	0.701683	1	1	no	0.0328795	0.019417	-0.75987	1	1	no
LOC100132111	chr1:151810338-151816641	0.234537	0.240744	0.0376836	1	1	no	0.336403	0.172457	-0.963955	1	1	no	0.224145	0.248161	0.146846	1	1	no
THEM5	chr1:151819576-151826173	0	0.0176877	inf	1	1	no	0.0639804	0.0243276	-1.39504	1	1	no	0	0.0789174	inf	1	1	no
THEM4	chr1:151843342-151882361	3.14342	3.0175	-0.05898	0.75425	0.999863	no	3.07138	2.9065	-0.0796047	0.54785	0.999462	no	2.83402	2.87381	0.020114	0.9163	0.989313	no
S100A11	chr1:152004981-152009511	578.934	560.742	-0.0460621	0.76485	0.999863	no	559.023	541.94	-0.044773	0.6866	0.999462	no	528.887	530.282	0.00380128	0.98175	0.996267	no
TCHHL1	chr1:152056619-152061540	0	0	0	1	1	no	0	0	0	1	1	no	0	0.00888721	inf	1	1	no
TCHH	chr1:152078792-152087930	3.41105	3.57036	0.0658563	0.7052	0.999863	no	3.62044	3.66903	0.0192344	0.87645	0.999462	no	3.91112	3.61979	-0.111679	0.5358	0.910151	no
RPTN	chr1:152126070-152131704	0	0	0	1	1	no	0	0	0	1	1	no	0	0	0	1	1	no
HRNR	chr1:152184551-152196672	0.0265997	0.0184948	-0.52429	1	1	no	0.0246221	0.031677	0.363483	1	1	no	0.0362194	0.076159	1.07225	1	1	no
FLG	chr1:152274650-152297679	0.006031	0.0141773	1.23311	1	1	no	0.00889496	0.00860978	-0.0470108	1	1	no	0.01876	0.0436434	1.21811	1	1	no
FLG2	chr1:152321212-152332482	0.0684484	0.130416	0.930033	1	1	no	0.108848	0.118309	0.120246	1	1	no	0.130196	0.11979	-0.12018	1	1	no
CRNN	chr1:152381718-152386750	0	0	0	1	1	no	0	0	0	1	1	no	0	0	0	1	1	no
LCE5A	chr1:152483319-152484653	0	0	0	1	1	no	0	0	0	1	1	no	0	0	0	1	1	no
CRCT1	chr1:152486977-152488481	0	0	0	1	1	no	0	0	0	1	1	no	0	0	0	1	1	no
LCE3E	chr1:152538174-152539229	0	0	0	1	1	no	0	0	0	1	1	no	0	0	0	1	1	no
LCE3D	chr1:152551859-152552980	0	0	0	1	1	no	0	0	0	1	1	no	0	0	0	1	1	no
LCE3C	chr1:152573137-152573562	0	0	0	1	1	no	0	0	0	1	1	no	0	0	0	1	1	no
LCE3B	chr1:152586286-152586574	0	0	0	1	1	no	0	0	0	1	1	no	0	0	0	1	1	no
LCE3A	chr1:152595309-152595579	0	0	0	1	1	no	0	0	0	1	1	no	0	0	0	1	1	no
LCE2D	chr1:152635886-152637135	0	0	0	1	1	no	0	0	0	1	1	no	0	0	0	1	1	no
LCE2C	chr1:152647790-152649049	0	0	0	1	1	no	0	0	0	1	1	no	0	0	0	1	1	no
LCE2B	chr1:152658598-152659876	0	0	0	1	1	no	0	0	0	1	1	no	0	0	0	1	1	no
LCE2A	chr1:152670839-152671918	0.0536544	0	-inf	1	1	no	0	0	0	1	1	no	0	0	0	1	1	no
LCE4A	chr1:152681522-152681910	0	0	0	1	1	no	0	0	0	1	1	no	0	0	0	1	1	no
C1orf68	chr1:152691997-152692905	0	0	0	1	1	no	0	0	0	1	1	no	0	0	0	1	1	no
KPRP	chr1:152730505-152734529	0	0	0	1	1	no	0	0	0	1	1	no	0	0	0	1	1	no
LCE1F	chr1:152748847-152749445	0	0	0	1	1	no	0	0	0	1	1	no	0	0	0	1	1	no
LCE1E	chr1:152758752-152760901	0	0	0	1	1	no	0	0	0	1	1	no	0	0	0	1	1	no
LCE1D	chr1:152769226-152770657	0	0	0	1	1	no	0	0	0	1	1	no	0	0	0	1	1	no
LCE1C	chr1:152777310-152779107	0	0	0	1	1	no	0	0	0	1	1	no	0	0	0	1	1	no
LCE1B	chr1:152784446-152785585	0	0	0	1	1	no	0	0	0	1	1	no	0	0	0	1	1	no
LCE1A	chr1:152799948-152800573	0	0	0	1	1	no	0	0	0	1	1	no	0	0	0	1	1	no
LCE6A	chr1:152815329-152816459	0.0454884	0	-inf	1	1	no	0	0	0	1	1	no	0	0	0	1	1	no
SMCP	chr1:152850797-152857523	0	0	0	1	1	no	0	0	0	1	1	no	0	0.0459513	inf	1	1	no
IVL	chr1:152881038-152884362	0	0	0	1	1	no	0	0	0	1	1	no	0	0	0	1	1	no
SPRR4	chr1:152943127-152945069	0	0	0	1	1	no	0	0	0	1	1	no	0	0	0	1	1	no
SPRR1A	chr1:152956563-152958290	0	0	0	1	1	no	0	0	0	1	1	no	0	0	0	1	1	no
SPRR3	chr1:152974222-152976332	0	0	0	1	1	no	0	0	0	1	1	no	0	0	0	1	1	no
SPRR1B	chr1:153003678-153005376	0	0	0	1	1	no	0	0	0	1	1	no	0	0	0	1	1	no
SPRR2D	chr1:153012200-153013594	0	0.0685303	inf	1	1	no	0	0	0	1	1	no	0	0	0	1	1	no
SPRR2A	chr1:153028595-153029988	0	0	0	1	1	no	0	0	0	1	1	no	0	0	0	1	1	no
SPRR2B	chr1:153042717-153044084	0	0	0	1	1	no	0	0	0	1	1	no	0	0	0	1	1	no
SPRR2E	chr1:153065610-153067001	0	0	0	1	1	no	0	0	0	1	1	no	0	0	0	1	1	no
SPRR2F	chr1:153084612-153085989	0	0	0	1	1	no	0	0	0	1	1	no	0	0	0	1	1	no
SPRR2C	chr1:153112593-153113969	0	0	0	1	1	no	0	0	0	1	1	no	0	0	0	1	1	no
SPRR2G	chr1:153122057-153123427	0	0	0	1	1	no	0	0	0	1	1	no	0	0	0	1	1	no
LELP1	chr1:153175905-153177601	0	0	0	1	1	no	0	0.0349939	inf	1	1	no	0	0	0	1	1	no
PRR9	chr1:153190059-153191793	0	0	0	1	1	no	0	0	0	1	1	no	0	0	0	1	1	no
LOR	chr1:153232178-153234600	0.0158271	0	-inf	1	1	no	0.0138364	0	-inf	1	1	no	0	0	0	1	1	no
PGLYRP3	chr1:153270337-153283194	0	0	0	1	1	no	0	0	0	1	1	no	0	0.0264381	inf	1	1	no
PGLYRP4	chr1:153302596-153321022	0.0215656	0	-inf	1	1	no	0	0.00767919	inf	1	1	no	0.0148782	0	-inf	1	1	no
C1orf233	chr1:1533387-1535476	15.1761	13.5746	-0.160888	0.342	0.999863	no	17.8145	16.998	-0.0676815	0.5768	0.999462	no	14.5154	13.305	-0.125613	0.47495	0.880194	no
S100A12	chr1:153346183-153348075	3.83717	4.60041	0.26172	0.4553	0.999863	no	3.71303	3.96375	0.0942656	0.68895	0.999462	no	4.41994	3.80366	-0.216639	0.57335	0.923741	no
S100A7A	chr1:153388999-153395701	0	0.00400279	inf	1	1	no	0	0	0	1	1	no	0	0	0	1	1	no
S100A7L2	chr1:153409470-153412503	0	0	0	1	1	no	0	0	0	1	1	no	0	0	0	1	1	no
S100A7	chr1:153430219-153433137	0	0	0	1	1	no	0.121319	0	-inf	1	1	no	0	0	0	1	1	no
S100A6	chr1:153507075-153508717	682.31	716.686	0.0709134	0.64925	0.999863	no	732.214	705.911	-0.0527785	0.64015	0.999462	no	678.27	634.114	-0.0971165	0.5405	0.910186	no
S100A5	chr1:153509622-153514241	0.862021	0.715077	-0.269623	0.5982	0.999863	no	0.826914	0.823537	-0.00590439	0.9521	0.999462	no	0.664812	0.819313	0.301468	0.60205	0.932591	no
S100A4	chr1:153516094-153518282	2069.22	2130.56	0.0421457	0.7862	0.999863	no	2180.1	2141.96	-0.0254655	0.82345	0.999462	no	2113.4	1838.44	-0.201088	0.20475	0.638374	no
S100A3	chr1:153519808-153521734	1.11916	0.776761	-0.526871	0.24005	0.999863	no	0.724969	0.970061	0.420158	0.2265	0.999462	no	0.627309	0.840605	0.422251	0.44995	0.867376	no
S100A2	chr1:153533584-153538306	1.25501	1.10466	-0.184088	0.6237	0.999863	no	1.00334	0.995554	-0.0112333	0.9653	0.999462	no	0.975829	1.069	0.131559	0.75925	0.96767	no
S100A16	chr1:153579366-153585514	0	0	0	1	1	no	0.0318161	0.0126591	-1.32959	1	1	no	0	0.0309648	inf	1	1	no
S100A14	chr1:153586731-153588808	0.0759325	0.0269773	-1.49297	1	1	no	0.0583599	0.0143031	-2.02865	1	1	no	0	0.0297141	inf	1	1	no
CHTOP	chr1:153591275-153618782	60.7536	60.7599	0.000149973	0.99955	0.999863	no	59.7623	60.0026	0.00578935	0.9605	0.999462	no	56.0825	54.9684	-0.0289487	0.86305	0.984884	no
S100A1	chr1:153591275-153618782	3.31668	3.86317	0.220048	0.6273	0.999863	no	3.51279	3.42444	-0.0367475	0.97915	0.999462	no	3.13909	2.43488	-0.366494	0.78655	0.973273	no
S100A13	chr1:153591275-153618782	17.2491	17.444	0.0162083	0.9799	0.999863	no	19.2143	18.7509	-0.0352221	0.94255	0.999462	no	16.7616	19.2222	0.197615	0.7751	0.97049	no
ILF2	chr1:153631129-153643504	131.79	131.384	-0.00445131	0.97835	0.999863	no	135.928	129.696	-0.0677109	0.56515	0.999462	no	118.854	126.101	0.0853871	0.6136	0.936715	no
SNAPIN	chr1:153631129-153643504	39.0039	39.4357	0.0158849	0.974	0.999863	no	38.0702	37.5285	-0.0206753	0.94965	0.999462	no	35.818	34.2632	-0.0640248	0.89115	0.987625	no
NPR1	chr1:153651163-153666468	0.0626819	0.0494211	-0.342923	1	1	no	0.0805864	0.0567705	-0.505395	1	1	no	0.116884	0.0453932	-1.36453	1	1	no
INTS3	chr1:153700566-153746555	32.7883	34.4529	0.0714447	0.6448	0.999863	no	34.6884	36.6047	0.0775761	0.48715	0.999462	no	39.6022	33.7903	-0.22897	0.14645	0.542682	no
SLC27A3	chr1:153747767-153752633	16.2899	15.6861	-0.0544951	0.74185	0.999863	no	19.1457	17.5279	-0.127368	0.2844	0.999462	no	17.6442	12.6417	-0.481005	0.00525	0.0566445	no
GATAD2B	chr1:153777202-153895451	12.0357	11.6276	-0.0497692	0.7521	0.999863	no	12.8729	11.678	-0.140542	0.2094	0.999462	no	12.3136	10.9487	-0.169493	0.29495	0.74463	no
DENND4B	chr1:153901976-153919154	49.272	49.1758	-0.00281723	0.98665	0.999863	no	53.2785	52.1904	-0.0297698	0.78575	0.999462	no	53.1245	49.5466	-0.100593	0.52525	0.905639	no
CRTC2	chr1:153920147-153931132	31.4912	30.9493	-0.0250389	0.872	0.999863	no	33.8036	32.5462	-0.0546881	0.6314	0.999462	no	32.1224	29.8488	-0.105907	0.50695	0.897229	no
CREB3L4	chr1:153931574-153950451	10.3424	10.3036	-0.00542296	0.9949	0.999863	no	10.6856	11.066	0.050466	0.9234	0.999462	no	11.9671	8.89125	-0.428621	0.6197	0.938883	no
JTB	chr1:153931574-153950451	109.353	109.344	-0.000111136	0.99965	0.999863	no	115.51	114.633	-0.010991	0.95025	0.999462	no	103.337	117.116	0.180572	0.4374	0.859606	no
SLC39A1	chr1:153931574-153950451	65.6768	64.5469	-0.0250364	0.915	0.999863	no	65.5478	66.9332	0.0301745	0.86505	0.999462	no	65.3379	75.0036	0.199038	0.4142	0.843757	no
RPS27	chr1:153963238-153964631	8679.67	9078.23	0.0647718	0.68185	0.999863	no	9252.04	9052.65	-0.0314309	0.7801	0.999462	no	8821.71	8970.44	0.0241198	0.88505	0.987026	no
NUP210L	chr1:153965167-154127592	0.0346712	0.0723287	1.06083	1	1	no	0.0499936	0.0446817	-0.162061	1	1	no	0.0343533	0.0487829	0.505926	1	1	no
TPM3	chr1:154127779-154164609	363.863	364.492	0.00249193	0.9883	0.999863	no	345.566	335.064	-0.0445225	0.69485	0.999462	no	333.84	307.852	-0.116918	0.4704	0.877827	no
MIR190B	chr1:154166140-154166219	0	0	0	1	1	no	0	0	0	1	1	no	0	0	0	1	1	no
C1orf189	chr1:154171561-154178841	0.100238	0.150011	0.581644	1	1	no	0.181291	0.185831	0.0356892	1	1	no	0	0.30602	inf	1	1	no
C1orf43	chr1:154179182-154243329	205.798	204.202	-0.0112316	0.9571	0.999863	no	199.761	197.159	-0.018917	0.9046	0.999462	no	192.752	223.63	0.214368	0.3117	0.760597	no
UBAP2L	chr1:154179182-154243329	74.5807	72.0492	-0.0498193	0.8391	0.999863	no	68.7883	70.3478	0.0323421	0.8562	0.999462	no	71.3903	68.0808	-0.06848	0.7814	0.972628	no
HAX1	chr1:154245038-154248355	89.4168	87.1111	-0.0376898	0.80405	0.999863	no	93.3315	86.6821	-0.10663	0.3506	0.999462	no	77.4033	85.2366	0.139079	0.38945	0.828407	no
AQP10	chr1:154293591-154297801	0	0	0	1	1	no	0	0	0	1	1	no	0	0	0	1	1	no
ATP8B2	chr1:154298035-154323780	7.94672	7.78869	-0.0289786	0.8738	0.999863	no	7.87205	8.06517	0.0349655	0.7813	0.999462	no	8.47288	7.83591	-0.112752	0.54155	0.910525	no
IL6R	chr1:154377668-154441926	96.8976	95.2861	-0.0241954	0.8784	0.999863	no	87.5115	90.8703	0.0543363	0.62745	0.999462	no	83.3695	78.0333	-0.0954298	0.54145	0.910525	no
UBE2Q1	chr1:154521050-154531120	56.4729	57.3969	0.0234137	0.88275	0.999863	no	56.8962	58.5807	0.0420929	0.7026	0.999462	no	54.4992	58.6336	0.105491	0.5005	0.89286	no
CHRNB2	chr1:154540256-154552353	0.0225288	0.00714902	-1.65596	1	1	no	0.0199043	0.010398	-0.936774	1	1	no	0.018389	0.0144895	-0.34383	1	1	no
ADAR	chr1:154554533-154600456	74.1144	74.4525	0.00656646	0.96805	0.999863	no	72.7303	65.0648	-0.160679	0.1561	0.999462	no	62.3568	61.3431	-0.0236466	0.8804	0.986522	no
KCNN3	chr1:154669941-154842754	0.0341804	0.0742242	1.11872	1	1	no	0.0504656	0.0662451	0.392513	1	1	no	0.0503219	0.0723612	0.524029	1	1	no
PMVK	chr1:154897207-154909484	32.8758	34.9877	0.0898246	0.59095	0.999863	no	33.8824	34.0253	0.00607043	0.9599	0.999462	no	31.5443	31.5115	-0.0015045	0.99175	0.997217	no
PBXIP1	chr1:154916558-154928567	30.418	30.6746	0.0121167	0.93955	0.999863	no	31.7809	36.2192	0.188592	0.094	0.999462	no	35.1049	26.3012	-0.416544	0.01005	0.0943679	no
PYGO2	chr1:154929501-154934258	23.547	22.1922	-0.0854898	0.59405	0.999863	no	25.0018	23.6104	-0.0826109	0.4667	0.999462	no	23.533	22.2295	-0.0822063	0.61025	0.935524	no
SHC1	chr1:154934773-154946959	47.3959	49.5772	0.0649121	0.6835	0.999863	no	45.669	47.0501	0.0429816	0.708	0.999462	no	45.6668	45.1071	-0.0177912	0.90715	0.988754	no
CKS1B	chr1:154947117-154951725	188.387	193.529	0.038848	0.80435	0.999863	no	192.346	191.973	-0.00279621	0.97965	0.999462	no	184.446	168.729	-0.128493	0.40905	0.84164	no
MIR4258	chr1:154947117-154951725	17.6833	14.7022	-0.266351	0.76175	0.999863	no	35.1667	30.7986	-0.191347	0.87755	0.999462	no	22.3203	65.3242	1.54926	0.59485	0.928984	no
FLAD1	chr1:154955769-154965587	20.9295	20.4047	-0.036634	0.82575	0.999863	no	21.9262	21.5244	-0.0266843	0.8265	0.999462	no	17.8386	21.7294	0.28465	0.0959	0.43144	no
LENEP	chr1:154966061-154966791	0.1275	0.146043	0.195899	1	1	no	0.196103	0.2388	0.284189	1	1	no	0	0.323159	inf	1	1	no
ZBTB7B	chr1:154975105-154991001	43.0985	41.2716	-0.0624894	0.6926	0.999863	no	44.7282	44.4812	-0.00798801	0.9418	0.999462	no	42.2199	37.7801	-0.160298	0.31465	0.761426	no
DCST2	chr1:154991002-155006257	0.402111	0.330745	-0.281875	0.4531	0.999863	no	0.349707	0.366276	0.0667832	0.7932	0.999462	no	0.466244	0.30614	-0.606891	1	1	no
ADAM15	chr1:155006281-155042029	52.7463	51.0537	-0.0470535	0.7734	0.999863	no	53.3043	51.7769	-0.0419439	0.71975	0.999462	no	48.7288	51.3264	0.0749253	0.6486	0.947174	no
DCST1	chr1:155006281-155042029	0.0687082	0.0262159	-1.39004	1	1	no	0.106931	0.0902195	-0.245176	1	1	no	0.165787	0.0653447	-1.34319	1	1	no
EFNA4	chr1:155006281-155042029	4.29977	4.40424	0.0346319	0.97215	0.999863	no	4.53569	4.48702	-0.0155655	0.98135	0.999462	no	3.66169	3.61535	-0.0183759	0.98625	0.996731	no
LOC100505666	chr1:155006281-155042029	1.83609	1.65278	-0.15174	0.9113	0.999863	no	1.95266	1.66672	-0.228432	0.8035	0.999462	no	2.11124	1.25202	-0.75383	0.65045	0.947763	no
EFNA3	chr1:155051347-155060014	1.60613	1.24268	-0.370133	0.1824	0.999863	no	2.01116	1.6042	-0.326176	0.0673	0.912518	no	2.70218	1.62893	-0.730198	0.0078	0.0773835	no
MIB2	chr1:1550794-1565990	17.5059	18.389	0.0710086	0.66715	0.999863	no	20.1938	22.6617	0.166344	0.15795	0.999462	no	20.0529	17.5076	-0.195831	0.23425	0.682302	no
EFNA1	chr1:155100348-155107386	0.0395989	0.0557629	0.493846	1	1	no	0.0880124	0.0693728	-0.343336	1	1	no	0.0387412	0.0793817	1.03494	1	1	no
SLC50A1	chr1:155108287-155111334	29.5616	28.8816	-0.0335758	0.84475	0.999863	no	30.5191	29.2376	-0.0618905	0.6155	0.999462	no	31.8596	29.5017	-0.110929	0.52545	0.905639	no
DPM3	chr1:155112366-155112996	144.64	139.094	-0.0564005	0.7432	0.999863	no	151.985	143.403	-0.0838567	0.50025	0.999462	no	141.341	145.787	0.0446828	0.7963	0.975371	no
KRTCAP2	chr1:155141883-155145804	229.914	226.783	-0.0197842	0.89905	0.999863	no	242.4	244.909	0.0148503	0.8962	0.999462	no	207.018	235.096	0.183491	0.25965	0.704956	no
TRIM46	chr1:155146262-155157447	3.17269	3.72397	0.231134	0.2382	0.999863	no	3.5282	4.04723	0.198001	0.1541	0.999462	no	3.37326	4.30065	0.35041	0.07255	0.365179	no
MIR92B	chr1:155164967-155165063	0	0	0	1	1	no	0	0	0	1	1	no	0	0	0	1	1	no
THBS3	chr1:155165378-155177772	9.07816	10.1427	0.159975	0.3574	0.999863	no	10.0736	11.5835	0.201485	0.09935	0.999462	no	11.8691	11.009	-0.10853	0.5253	0.905639	no
GBAP1	chr1:155178489-155197325	3.33858	3.45411	0.0490786	0.9168	0.999863	no	3.87363	3.58314	-0.112464	0.77145	0.999462	no	3.60666	4.2973	0.252765	0.57655	0.924518	no
GBA	chr1:155204238-155214653	28.0231	27.2951	-0.0379727	0.8166	0.999863	no	26.7846	28.4157	0.0852829	0.46465	0.999462	no	26.5909	23.7985	-0.16006	0.32945	0.776152	no
SCAMP3	chr1:155225769-155232176	71.7695	70.332	-0.0291897	0.85515	0.999863	no	72.1578	69.2081	-0.060214	0.60035	0.999462	no	65.7604	64.5307	-0.0272346	0.869	0.985156	no
CLK2	chr1:155232658-155243281	54.7967	58.0209	0.0824839	0.60095	0.999863	no	62.8311	60.4635	-0.0554147	0.62175	0.999462	no	63.2963	64.6508	0.0305477	0.84475	0.98347	no
PKLR	chr1:155247217-155271225	0.740899	0.659196	-0.168569	0.74705	0.999863	no	0.844106	0.77868	-0.116393	0.7737	0.999462	no	0.875123	0.753804	-0.215295	0.6823	0.954062	no
FDPS	chr1:155278538-155300909	811.132	858.679	0.0821826	0.63525	0.999863	no	828.141	801.367	-0.0474144	0.7074	0.999462	no	898.384	720.922	-0.317489	0.07785	0.379162	no
RUSC1	chr1:155278538-155300909	33.7869	33.6638	-0.00526693	0.99375	0.999863	no	34.3177	35.6435	0.0546843	0.91065	0.999462	no	32.1312	33.0379	0.040149	0.95465	0.993672	no
RUSC1-AS1	chr1:155278538-155300909	81.9091	84.4597	0.0442391	0.94215	0.999863	no	90.0056	82.6857	-0.122377	0.76015	0.999462	no	93.8889	76.4682	-0.296095	0.5914	0.927301	no
ASH1L	chr1:155305051-155533735	11.2011	11.3869	0.0237392	0.8783	0.999863	no	10.5951	10.5857	-0.00127963	0.99105	0.999462	no	12.2402	10.4445	-0.228878	0.15025	0.550059	no
ASH1L-AS1	chr1:155305051-155533735	2.11319	1.75704	-0.266281	0.8041	0.999863	no	2.05362	2.0161	-0.0266071	0.971	0.999462	no	2.36953	2.12914	-0.154329	0.85475	0.983534	no
MIR555	chr1:155305051-155533735	21.1479	59.888	1.50175	0.57555	0.999863	no	40.4217	32.4058	-0.318879	0.87585	0.999462	no	52.9384	0	-inf	0.22215	0.664928	no
POU5F1P4	chr1:155305051-155533735	0.0237781	0.0578801	1.28343	1	1	no	0.0162924	0.0267483	0.715252	1	1	no	0	0	0	1	1	no
MSTO1	chr1:155579960-155584758	5.69939	5.77806	0.0197778	0.9213	0.999863	no	5.97498	5.31684	-0.168366	0.21565	0.999462	no	5.06431	5.74446	0.181805	0.36125	0.804797	no
YY1AP1	chr1:155629232-155658823	51.4021	51.1339	-0.00754804	0.9633	0.999863	no	54.5451	50.9671	-0.0978834	0.38595	0.999462	no	50.743	50.7461	8.82567e-05	0.99965	0.999846	no
DAP3	chr1:155658881-155708800	80.3279	80.9171	0.0105431	0.94545	0.999863	no	83.4596	78.1054	-0.0956555	0.39125	0.999462	no	79.7869	94.7067	0.247314	0.11365	0.471594	no
GON4L	chr1:155715558-155826972	9.64089	9.69662	0.00831568	0.9581	0.999863	no	9.14787	9.2363	0.0138798	0.9079	0.999462	no	8.89753	8.88196	-0.0025267	0.9873	0.997139	no
MSTO2P	chr1:155715558-155826972	0.164673	0.161725	-0.0260676	1	1	no	0.180693	0.136756	-0.401936	1	1	no	0.152139	0.2357	0.631559	1	1	no
FHAD1	chr1:15573767-15724622	0.0758896	0.100066	0.398983	1	1	no	0.0868165	0.0970161	0.160256	1	1	no	0.105359	0.0699552	-0.590805	1	1	no
SYT11	chr1:155829259-155854990	0.397842	0.382993	-0.0548788	0.8518	0.999863	no	0.442181	0.374228	-0.24072	0.21405	0.999462	no	0.382385	0.538658	0.494344	0.0977	0.436381	no
RIT1	chr1:155867598-155881193	14.3412	15.9525	0.153624	0.33755	0.999863	no	14.8461	13.7436	-0.111326	0.34095	0.999462	no	14.1281	15.9213	0.172388	0.29285	0.742607	no
KIAA0907	chr1:155882835-155904188	32.6018	33.8751	0.0552754	0.72415	0.999863	no	32.0126	32.1783	0.00745019	0.9464	0.999462	no	33.2289	32.0478	-0.0522142	0.74095	0.966619	no
SCARNA4	chr1:155882835-155904188	3.56821	4.22007	0.242066	1	1	no	7.53937	3.80089	-0.988107	0.71315	0.999462	no	0	0	0	1	1	no
SNORA42	chr1:155882835-155904188	3.26405	5.42997	0.73428	0.7252	0.999863	no	1.72255	3.82786	1.15199	0.56545	0.999462	no	0	0	0	1	1	no
RXFP4	chr1:155911479-155912625	0.0791691	0.153337	0.953693	1	1	no	0.0621952	0.0948366	0.60864	1	1	no	0.161016	0.252102	0.646801	1	1	no
SSR2	chr1:155978838-155990758	283.176	284.004	0.00421437	0.9785	0.999863	no	276.857	283.508	0.0342464	0.756	0.999462	no	266.019	274.64	0.0460111	0.77415	0.970418	no
UBQLN4	chr1:156005091-156023516	16.2226	16.4879	0.0233955	0.8873	0.999863	no	16.2603	15.9601	-0.0268816	0.8158	0.999462	no	14.4022	15.4627	0.102507	0.53305	0.910151	no
LAMTOR2	chr1:156024516-156028301	137.563	128.766	-0.0953414	0.5547	0.999863	no	139.368	137.413	-0.0203739	0.85725	0.999462	no	121.546	133.042	0.130371	0.42595	0.852961	no
RAB25	chr1:156030965-156040295	0.0653634	0.0251484	-1.37802	1	1	no	0	0.0251163	inf	1	1	no	0.0285603	0.0605413	1.08391	1	1	no
MEX3A	chr1:156041803-156051789	0.501172	0.457488	-0.131572	0.61505	0.999863	no	0.583667	0.555153	-0.0722597	0.67845	0.999462	no	0.54318	0.427611	-0.345132	0.20195	0.634415	no
SEMA4A	chr1:156119734-156147542	25.19	24.0035	-0.0696042	0.6578	0.999863	no	25.0897	25.9043	0.0460988	0.689	0.999462	no	25.206	24.6719	-0.0309017	0.8505	0.983531	no
SLC25A44	chr1:156163729-156182587	17.8913	17.7702	-0.00980249	0.9522	0.999863	no	16.9401	17.1804	0.0203162	0.8617	0.999462	no	15.0382	19.4153	0.368563	0.0248	0.181729	no
BGLAP	chr1:156182778-156217908	0.729879	0.764174	0.066244	0.87005	0.999863	no	1.63422	1.27195	-0.361566	0.8433	0.999462	no	0.767393	3.19426	2.05744	0.3604	0.803781	no
PAQR6	chr1:156182778-156217908	4.00502	4.09026	0.0303831	0.94475	0.999863	no	5.44764	4.9306	-0.143869	0.6068	0.999462	no	4.37855	6.26228	0.516236	0.18355	0.606118	no
PMF1	chr1:156182778-156217908	36.0119	32.683	-0.139934	0.4697	0.999863	no	38.9258	38.3548	-0.0213219	0.87715	0.999462	no	33.5985	30.2754	-0.150255	0.4631	0.875565	no
PMF1-BGLAP	chr1:156182778-156217908	4.58155	5.23616	0.192674	0.7452	0.999863	no	4.17163	5.2274	0.325483	0.53755	0.999462	no	5.13851	3.38202	-0.603463	0.3823	0.823272	no
SMG5	chr1:156219014-156252620	42.4269	42.5602	0.00452519	0.97695	0.999863	no	44.252	42.8242	-0.0473163	0.6684	0.999462	no	39.5958	47.6109	0.265942	0.0939	0.426312	no
TMEM79	chr1:156252703-156262234	5.38636	5.62914	0.0636039	0.73635	0.999863	no	5.7953	6.04381	0.0605739	0.65295	0.999462	no	5.85878	5.6813	-0.0443795	0.82005	0.979601	no
C1orf85	chr1:156262477-156265480	29.4328	28.9373	-0.0244913	0.88405	0.999863	no	29.6402	29.9654	0.015745	0.89875	0.999462	no	27.5059	26.1055	-0.0753896	0.66475	0.950735	no
VHLL	chr1:156268414-156269428	0.0458277	0.0632606	0.465088	1	1	no	0.044685	0.0300645	-0.571729	1	1	no	0.031113	0.0374394	0.26704	1	1	no
CCT3	chr1:156278751-156316785	171.526	172.875	0.0113034	0.9418	0.999863	no	167.854	161.781	-0.0531639	0.63155	0.999462	no	159.573	179.614	0.170685	0.2741	0.722536	no
TSACC	chr1:156278751-156316785	0.765855	0.572372	-0.420118	0.8318	0.999863	no	0.810818	0.847673	0.0641307	0.97095	0.999462	no	0.897027	0.98904	0.140878	0.94005	0.990895	no
RHBG	chr1:156338979-156355013	0.899756	1.1622	0.369251	0.2069	0.999863	no	0.987443	1.09627	0.150834	0.44015	0.999462	no	0.9883	1.12171	0.182685	0.5442	0.912374	no
C1orf61	chr1:156374054-156399184	0	0	0	1	1	no	0.0207889	0	-inf	1	1	no	0	0	0	1	1	no
MIR9-1	chr1:156374054-156399184	0	0	0	1	1	no	0	0	0	1	1	no	0	0	0	1	1	no
IQGAP3	chr1:156495196-156542396	33.377	34.2787	0.0384568	0.796	0.999863	no	36.9938	36.8176	-0.00688576	0.95305	0.999462	no	39.8086	30.7447	-0.372744	0.01955	0.151795	no
TTC24	chr1:156549518-156556562	0.0108551	0.0249571	1.20107	1	1	no	0	0	0	1	1	no	0	0	0	1	1	no
APOA1BP	chr1:156561557-156564091	85.2223	81.9745	-0.0560552	0.72875	0.999863	no	85.2504	81.3412	-0.0677207	0.5542	0.999462	no	78.1414	85.8852	0.136323	0.4008	0.835125	no
GPATCH4	chr1:156564099-156571279	23.2186	22.7891	-0.0269378	0.87105	0.999863	no	22.7567	20.2865	-0.165767	0.17455	0.999462	no	21.4248	25.1323	0.230264	0.1706	0.584371	no
HAPLN2	chr1:156589085-156595517	0.0241385	0.0451114	0.902154	1	1	no	0.00657262	0.023877	1.86108	1	1	no	0	0.0659967	inf	1	1	no
BCAN	chr1:156611739-156629324	0.566113	0.457989	-0.305777	0.32415	0.999863	no	0.452778	0.744165	0.716817	0.0014	0.0626544	no	0.688003	0.598938	-0.200008	0.53025	0.908358	no
NES	chr1:156638555-156647189	0.0725023	0.0983052	0.439241	1	1	no	0.0742567	0.0683116	-0.12039	1	1	no	0.0678551	0.0386802	-0.810863	1	1	no
CRABP2	chr1:156669399-156675608	0.213471	0.147119	-0.537062	1	1	no	0.412961	0.318509	-0.37467	0.372	0.999462	no	0.42164	0.45489	0.109507	1	1	no
ISG20L2	chr1:156692412-156697705	29.2686	28.0475	-0.0614818	0.7073	0.999863	no	27.213	28.1315	0.0478882	0.6821	0.999462	no	24.3031	29.0424	0.257023	0.1201	0.486265	no
RRNAD1	chr1:156698262-156706752	18.974	19.0905	0.00883048	0.9589	0.999863	no	18.4993	20.8258	0.170903	0.1659	0.999462	no	19.1045	20.0025	0.0662623	0.7062	0.960935	no
MRPL24	chr1:156707093-156710923	59.6912	61.5222	0.0435887	0.79065	0.999863	no	58.6251	57.9495	-0.0167225	0.8946	0.999462	no	56.4593	70.2547	0.315385	0.0624	0.33452	no
HDGF	chr1:156711898-156722240	230.269	233.303	0.0188806	0.9032	0.999863	no	243.379	228.381	-0.0917641	0.418	0.999462	no	229.933	222.306	-0.0486657	0.76	0.967777	no
PRCC	chr1:156737273-156770609	48.6577	47.6315	-0.0307516	0.8469	0.999863	no	48.0133	48.9654	0.0283293	0.80345	0.999462	no	45.0163	46.8303	0.0569947	0.7218	0.963142	no
MMP23B	chr1:1567559-1570030	0.273091	0.284675	0.0599317	1	1	no	0.357945	0.281113	-0.34859	1	1	no	0.169634	0.322772	0.92809	1	1	no
INSRR	chr1:156776034-156851642	0.0140796	0.0294667	1.06548	1	1	no	0.0367635	0.0216389	-0.76465	1	1	no	0.0177158	0.0132994	-0.413676	1	1	no
NTRK1	chr1:156776034-156851642	0.104649	0.313004	1.58062	1	1	no	0.233025	0.145566	-0.678809	1	1	no	0.0714126	0.134642	0.914877	1	1	no
PEAR1	chr1:156863522-156886226	0.328042	0.301487	-0.121785	1	1	no	0.387786	0.297696	-0.381419	0.06365	0.890345	no	0.415633	0.209636	-0.987421	1	1	no
LRRC71	chr1:156890423-156902880	0.0402674	0.0221169	-0.864464	1	1	no	0.0570275	0.0184879	-1.62508	1	1	no	0.0689995	0.0142718	-2.27342	1	1	no
ARHGEF11	chr1:156904631-157015162	11.4686	10.9998	-0.0602222	0.70205	0.999863	no	11.3131	11.3092	-0.000492691	0.9961	0.999462	no	10.3341	12.1548	0.234107	0.1466	0.542797	no
MIR765	chr1:156904631-157015162	6.27213	12.2594	0.966861	0.70745	0.999863	no	4.12231	3.41079	-0.273344	1	1	no	0	9.3469	inf	1	1	no
ETV3L	chr1:157061834-157069600	0.0795918	0.0529551	-0.587849	1	1	no	0.079851	0.025099	-1.66968	1	1	no	0.0145048	0.0140774	-0.04315	1	1	no
CYCSP52	chr1:157094458-157108383	0.69961	0.522673	-0.420643	0.66885	0.999863	no	1.01701	0.641313	-0.665235	0.74055	0.999462	no	0.719698	0.753793	0.0667781	0.5902	0.927301	no
ETV3	chr1:157094458-157108383	5.47064	5.37351	-0.0258441	0.89335	0.999863	no	4.77444	5.06187	0.0843414	0.55185	0.999462	no	5.38138	4.95638	-0.118691	0.5601	0.919454	no
CDK11A	chr1:1571099-1655791	10.3969	10.307	-0.0125332	0.97245	0.999863	no	11.1026	10.3843	-0.0964893	0.73445	0.999462	no	10.604	10.2369	-0.050822	0.89085	0.987625	no
CDK11B	chr1:1571099-1655791	18.9769	20.1089	0.0835958	0.76025	0.999863	no	20.2578	19.4972	-0.0552106	0.7932	0.999462	no	19.6221	19.2196	-0.0299057	0.92165	0.989555	no
MMP23A	chr1:1571099-1655791	0	0	0	1	1	no	0	0	0	1	1	no	0	0	0	1	1	no
SLC35E2B	chr1:1571099-1655791	10.0334	9.62006	-0.0606901	0.7888	0.999863	no	9.86022	10.4512	0.0839787	0.66955	0.999462	no	10.2483	9.38255	-0.127334	0.6036	0.932746	no
EFHD2	chr1:15736390-15756839	76.0034	77.047	0.0196742	0.8984	0.999863	no	76.54	84.6727	0.145682	0.1902	0.999462	no	64.8279	83.1036	0.358297	0.0227	0.16989	no
FCRL5	chr1:157483166-157522310	0	0	0	1	1	no	0	0.00227494	inf	1	1	no	0	0	0	1	1	no
FCRL4	chr1:157543538-157567870	0	0	0	1	1	no	0	0	0	1	1	no	0	0	0	1	1	no
FCRL3	chr1:157647977-157670647	0	0	0	1	1	no	0	0	0	1	1	no	0	0	0	1	1	no
CTRC	chr1:15764937-15773153	0.322542	0.1674	-0.946186	1	1	no	0.239735	0.27717	0.209335	1	1	no	0.215943	0.233103	0.110313	1	1	no
FCRL2	chr1:157715522-157746922	0.00855344	0	-inf	1	1	no	0.0045258	0.0102023	1.17264	1	1	no	0.0221164	0.0965295	2.12585	1	1	no
FCRL1	chr1:157764193-157789940	0.0528532	0.0197798	-1.41796	1	1	no	0.0493847	0.0827193	0.744159	1	1	no	0.0271531	0.163104	2.5866	1	1	no
CD5L	chr1:157800703-157811634	0.0765834	0.0987666	0.366991	1	1	no	0.0986384	0.0815943	-0.273681	1	1	no	0.141129	0.0834899	-0.757339	1	1	no
CELA2A	chr1:15783222-15798586	0	0.0306729	inf	1	1	no	0.0146806	0.0165375	0.171825	1	1	no	0	0.0338412	inf	1	1	no
KIRREL	chr1:157963062-158065844	0.0781181	0.0703462	-0.151184	1	1	no	0.0656182	0.104674	0.67373	1	1	no	0.082832	0.0713814	-0.214641	1	1	no
CELA2B	chr1:15802595-15817895	0	0.0313918	inf	1	1	no	0	0.0172646	inf	1	1	no	0.103784	0	-inf	1	1	no
LOC646268	chr1:158101833-158110430	0	0	0	1	1	no	0	0	0	1	1	no	0	0	0	1	1	no
CASP9	chr1:15818768-15851285	7.40831	7.29005	-0.0232158	0.90125	0.999863	no	7.3491	7.60841	0.0500262	0.70455	0.999462	no	6.45933	7.45599	0.207014	0.2923	0.741784	no
CD1A	chr1:158223926-158228058	0.159485	0.0488611	-1.70666	1	1	no	0.175762	0.0757851	-1.21364	1	1	no	0.109167	0.0651489	-0.744725	1	1	no
CD1C	chr1:158259562-158264564	0.233743	0.268312	0.198987	1	1	no	0.280678	0.133246	-1.07482	1	1	no	0.075929	0.164302	1.11363	1	1	no
CD1B	chr1:158297739-158301321	0.0171911	0.0342434	0.994167	1	1	no	0	0.0203518	inf	1	1	no	0.0682218	0	-inf	1	1	no
CD1E	chr1:158323485-158327343	0.152723	0.027941	-2.45047	1	1	no	0.0784269	0.0627131	-0.322581	1	1	no	0.0216209	0.0855225	1.98387	1	1	no
OR10T2	chr1:158368311-158369256	0	0	0	1	1	no	0	0.0167273	inf	1	1	no	0	0	0	1	1	no
OR10K2	chr1:158389717-158390656	0	0	0	1	1	no	0	0	0	1	1	no	0	0	0	1	1	no
OR10K1	chr1:158435351-158436293	0	0	0	1	1	no	0	0	0	1	1	no	0	0	0	1	1	no
OR10R2	chr1:158449667-158450675	0	0	0	1	1	no	0	0	0	1	1	no	0	0	0	1	1	no
OR6Y1	chr1:158516917-158517895	0	0	0	1	1	no	0.0174346	0	-inf	1	1	no	0	0	0	1	1	no
OR6P1	chr1:158532440-158533394	0	0	0	1	1	no	0	0	0	1	1	no	0	0	0	1	1	no
AGMAT	chr1:15853351-15911605	2.7734	2.90578	0.0672668	0.83345	0.999863	no	2.5146	2.72232	0.114507	0.63815	0.999462	no	2.36535	3.0108	0.348097	0.31315	0.760998	no
DNAJC16	chr1:15853351-15911605	3.27625	3.22976	-0.0206179	0.91835	0.999863	no	3.2525	3.14148	-0.0501059	0.7384	0.999462	no	3.06366	3.32806	0.119429	0.579	0.924518	no
OR10X1	chr1:158548708-158549689	0	0	0	1	1	no	0	0	0	1	1	no	0	0	0	1	1	no
OR10Z1	chr1:158576228-158577170	0	0	0	1	1	no	0	0	0	1	1	no	0	0	0	1	1	no
SPTA1	chr1:158580495-158656506	0.0893054	0.135944	0.606193	1	1	no	0.121751	0.0827327	-0.557402	1	1	no	0.0877371	0.0563816	-0.637962	1	1	no
OR6K2	chr1:158669467-158670442	0	0	0	1	1	no	0	0	0	1	1	no	0	0	0	1	1	no
OR6K3	chr1:158686957-158687905	0	0	0	1	1	no	0	0.0156654	inf	1	1	no	0	0	0	1	1	no
OR6K6	chr1:158724605-158725637	0	0	0	1	1	no	0	0	0	1	1	no	0	0	0	1	1	no
OR6N1	chr1:158735533-158736472	0	0	0	1	1	no	0	0	0	1	1	no	0	0	0	1	1	no
OR6N2	chr1:158746471-158747425	0	0	0	1	1	no	0	0	0	1	1	no	0	0	0	1	1	no
MNDA	chr1:158801167-158819270	61.3466	52.4287	-0.226626	0.1505	0.999863	no	49.9314	48.0585	-0.0551549	0.62625	0.999462	no	60.9295	54.9419	-0.149234	0.358	0.801079	no
PYHIN1	chr1:158901336-158946849	1.78313	1.68903	-0.0782135	0.75445	0.999863	no	1.60821	1.59589	-0.0110937	0.94855	0.999462	no	1.79406	1.77459	-0.0157407	0.95215	0.993157	no
IFI16	chr1:158979681-159024945	13.9646	13.0903	-0.0932697	0.5797	0.999863	no	12.7963	9.66809	-0.404424	0.00115	0.0545748	no	9.97141	8.49102	-0.23186	0.1958	0.624852	no
AIM2	chr1:159032274-159046647	0.0538909	0.112292	1.05914	1	1	no	0.0728443	0.0475018	-0.616833	1	1	no	0.0610655	0.0434013	-0.49262	1	1	no
CADM3	chr1:159141376-159172932	0	0.00489839	inf	1	1	no	0.00626	0.0036667	-0.771679	1	1	no	0.00723476	0	-inf	1	1	no
LOC100131825	chr1:159141376-159172932	0.00534656	0	-inf	1	1	no	0	0	0	1	1	no	0	0	0	1	1	no
DARC	chr1:159173802-159176290	0	0	0	1	1	no	0	0	0	1	1	no	0	0	0	1	1	no
FCER1A	chr1:159259503-159278014	0.0802281	0.0176623	-2.18344	1	1	no	0.0400329	0.0251176	-0.672485	1	1	no	0.105186	0	-inf	1	1	no
OR10J3	chr1:159283459-159284449	0	0	0	1	1	no	0	0	0	1	1	no	0	0	0	1	1	no
OR10J1	chr1:159409511-159410600	0	0	0	1	1	no	0	0	0	1	1	no	0	0	0	1	1	no
DDI2	chr1:15943952-15988217	1.85932	1.79357	-0.051936	0.8674	0.999863	no	1.5266	1.67226	0.131483	0.6063	0.999462	no	1.66417	1.7315	0.057216	0.88	0.986522	no
RSC1A1	chr1:15943952-15988217	3.34754	3.21773	-0.0570605	0.83005	0.999863	no	2.96373	2.88186	-0.0404138	0.85275	0.999462	no	3.1107	2.95027	-0.0763951	0.81625	0.978799	no
OR10J5	chr1:159504867-159505797	0.0221596	0	-inf	1	1	no	0	0	0	1	1	no	0	0	0	1	1	no
APCS	chr1:159557615-159558661	0	0	0	1	1	no	0	0	0	1	1	no	0	0	0	1	1	no
CRP	chr1:159682078-159684379	0	0	0	1	1	no	0.00790533	0	-inf	1	1	no	0	0	0	1	1	no
DUSP23	chr1:159750758-159752333	42.9243	42.3235	-0.0203363	0.90505	0.999863	no	45.9994	47.6851	0.0519226	0.67955	0.999462	no	34.2122	41.9403	0.293825	0.1133	0.471142	no
FCRL6	chr1:159772172-159786047	0.103453	0.187405	0.857179	1	1	no	0.173456	0.123408	-0.49113	1	1	no	0.0882862	0.179522	1.0239	1	1	no
C1orf204	chr1:159796478-159832447	0.745099	0.579979	-0.361433	0.30435	0.999863	no	0.746049	0.590789	-0.336627	0.1993	0.999462	no	0.763744	0.699234	-0.127314	0.76305	0.968158	no
SLAMF8	chr1:159796478-159832447	0.407371	0.321986	-0.339345	0.42785	0.999863	no	0.367417	0.253024	-0.538144	0.1454	0.999462	no	0.323333	0.267686	-0.27248	1	1	no
VSIG8	chr1:159796478-159832447	0.0714842	0.0201126	-1.82953	1	1	no	0.0926196	0.0755262	-0.294341	1	1	no	0.0619001	0.107185	0.79209	1	1	no
CCDC19	chr1:159842153-159869906	0.107433	0.147264	0.454961	1	1	no	0.281944	0.269044	-0.0675661	1	1	no	0.254609	0.262717	0.0452269	1	1	no
TAGLN2	chr1:159887902-159895284	542.21	526.846	-0.041469	0.79095	0.999863	no	580.979	546.128	-0.0892462	0.42525	0.999462	no	503.198	420.148	-0.260229	0.1016	0.445509	no
SLAMF9	chr1:159921281-159924044	2.98807	4.13023	0.46701	0.1113	0.999863	no	3.80776	3.82283	0.00569766	0.97545	0.999462	no	2.83943	2.46362	-0.204818	0.53955	0.910186	no
LOC100505633	chr1:159931013-159948876	3.48778	3.24526	-0.103975	0.68585	0.999863	no	4.52427	4.04309	-0.162229	0.32525	0.999462	no	4.6558	3.071	-0.600318	0.02135	0.162092	no
PIGM	chr1:159997461-160001783	8.08853	7.62565	-0.0850179	0.61535	0.999863	no	7.98205	7.37875	-0.113383	0.35905	0.999462	no	8.70424	6.45736	-0.430774	0.0135	0.116526	no
KCNJ10	chr1:160007256-160040051	0.0284631	0.019529	-0.543476	1	1	no	0.0379172	0.038692	0.0291817	1	1	no	0.0242422	0.0144357	-0.747876	1	1	no
KCNJ9	chr1:160051359-160059212	0.0124013	0	-inf	1	1	no	0.011034	0.00365638	-1.59347	1	1	no	0	0	0	1	1	no
IGSF8	chr1:160061128-160068618	12.8079	12.635	-0.0196143	0.9079	0.999863	no	13.8945	13.3737	-0.0551076	0.65535	0.999462	no	13.9223	11.081	-0.329314	0.0616	0.332184	no
ATP1A2	chr1:160085519-160113374	0.214255	0.272972	0.349428	1	1	no	0.323679	0.259909	-0.31656	1	1	no	0.292642	0.26907	-0.121155	1	1	no
PLEKHM2	chr1:16010826-16061264	28.5866	28.6857	0.00499577	0.9757	0.999863	no	30.5232	30.3552	-0.00796056	0.9457	0.999462	no	25.8796	27.164	0.0698775	0.658	0.950539	no
ATP1A4	chr1:160121351-160156767	0	0.0311184	inf	1	1	no	0.00359888	0	-inf	1	1	no	0	0	0	1	1	no
CASQ1	chr1:160160284-160171676	0.0656308	0.0730232	0.153982	1	1	no	0.0737264	0.0315471	-1.22467	1	1	no	0.0720193	0.0168624	-2.09458	1	1	no
PEA15	chr1:160175124-160185162	58.0528	57.8623	-0.00474174	0.9756	0.999863	no	59.6173	50.15	-0.249482	0.02645	0.534366	no	53.1397	41.3279	-0.362674	0.0235	0.174635	no
DCAF8	chr1:160185504-160232350	35.8927	38.1076	0.0863896	0.59685	0.999863	no	38.4042	38.7208	0.0118453	0.9204	0.999462	no	39.4282	38.8421	-0.0216062	0.89845	0.987768	no
PEX19	chr1:160246598-160254941	22.9149	21.8516	-0.0685461	0.6669	0.999863	no	22.237	23.2148	0.0620807	0.59215	0.999462	no	22.4375	24.0578	0.100595	0.53505	0.910151	no
COPA	chr1:160258376-160328742	60.3078	59.083	-0.0296012	0.8902	0.999863	no	57.0041	57.9355	0.0233805	0.88125	0.999462	no	58.2798	61.915	0.0872928	0.6904	0.957046	no
NCSTN	chr1:160258376-160328742	97.2409	92.4053	-0.0735875	0.749	0.999863	no	94.0139	96.9303	0.0440746	0.7904	0.999462	no	94.414	93.5432	-0.0133683	0.95625	0.993933	no
SUMO1P3	chr1:160258376-160328742	0.0533125	0.0926317	0.797031	1	1	no	0.0646555	0.0705506	0.125885	1	1	no	0.20692	0.0824061	-1.32825	1	1	no
NHLH1	chr1:160336860-160342638	0.142106	0.344973	1.27951	1	1	no	0.308723	0.221859	-0.476666	1	1	no	0.182396	0.27929	0.614691	1	1	no
VANGL2	chr1:160370363-160398468	0.208795	0.284777	0.447745	1	1	no	0.220215	0.270345	0.295888	1	1	no	0.272741	0.24866	-0.133356	1	1	no
SLAMF6	chr1:160454819-160493052	3.66363	3.25409	-0.171017	0.3998	0.999863	no	3.38909	3.46839	0.0333689	0.81605	0.999462	no	3.50701	2.82952	-0.309687	0.1484	0.545622	no
CD84	chr1:160510883-160549306	7.54048	7.13586	-0.0795685	0.6233	0.999863	no	6.55271	6.60903	0.0123471	0.9166	0.999462	no	7.64383	6.6945	-0.191319	0.25055	0.694578	no
SLAMF1	chr1:160579890-160617081	0.731133	0.856536	0.228381	0.4721	0.999863	no	0.84401	0.805128	-0.0680426	0.7465	0.999462	no	0.713092	1.19092	0.73991	0.02655	0.189974	no
SLC25A34	chr1:16062808-16067884	0.851204	0.809492	-0.0724882	0.7882	0.999863	no	0.907487	1.00755	0.150904	0.39955	0.999462	no	0.736742	0.903979	0.29513	0.3067	0.756562	no
CD48	chr1:160648535-160681641	0.0178251	0.0551229	1.62874	1	1	no	0	0.0136346	inf	1	1	no	0.105062	0.0285036	-1.88203	1	1	no
TMEM82	chr1:16068986-16074292	0	0	0	1	1	no	0	0	0	1	1	no	0	0	0	1	1	no
SLAMF7	chr1:160709076-160724601	0.290395	0.322973	0.153396	1	1	no	0.324054	0.21121	-0.617556	1	1	no	0.423697	0.268301	-0.65918	1	1	no
LY9	chr1:160765863-160798045	1.80127	1.43801	-0.324945	0.21315	0.999863	no	1.51362	1.64216	0.117598	0.51365	0.999462	no	1.37045	1.47023	0.101392	0.72475	0.963142	no
ITLN1	chr1:160846329-160854960	0	0.0837901	inf	1	1	no	0.0286539	0.0113954	-1.33028	1	1	no	0	0.0540923	inf	1	1	no
FBLIM1	chr1:16085254-16113084	1.21918	1.3255	0.120622	0.67925	0.999863	no	1.70476	1.70808	0.00280617	0.9877	0.999462	no	1.38068	1.72312	0.319642	0.2586	0.703921	no
ITLN2	chr1:160914815-160924589	0.0415517	0	-inf	1	1	no	0	0.0128953	inf	1	1	no	0	0	0	1	1	no
F11R	chr1:160965000-160991133	19.4323	21.1461	0.121936	0.4434	0.999863	no	20.2476	22.0484	0.122925	0.2787	0.999462	no	20.911	22.496	0.105406	0.5109	0.898239	no
TSTD1	chr1:161007421-161008774	0.309394	0.211066	-0.551752	1	1	no	0.284606	0.420364	0.562674	0.44805	0.999462	no	0.201709	0.0621607	-1.6982	1	1	no
USF1	chr1:161009040-161015769	75.5343	78.9021	0.0629315	0.68745	0.999863	no	81.467	77.1097	-0.0793024	0.47815	0.999462	no	72.5307	68.4633	-0.0832613	0.6039	0.932753	no
ARHGAP30	chr1:161016731-161039760	113.806	126.217	0.149329	0.3365	0.999863	no	118.352	125.161	0.080695	0.476	0.999462	no	118.474	135.093	0.189384	0.2354	0.68289	no
PVRL4	chr1:161040780-161059385	0.174946	0.168684	-0.0525878	1	1	no	0.161207	0.125075	-0.366122	1	1	no	0.195757	0.065697	-1.57517	1	1	no
KLHDC9	chr1:161068150-161070138	0.0223972	0.029598	0.402183	1	1	no	0.0519107	0.0531726	0.0346493	1	1	no	0.0292512	0.0334293	0.192614	1	1	no
DEDD	chr1:161070345-161102478	28.8684	29.7158	0.041738	0.86655	0.999863	no	30.51	29.0919	-0.0686633	0.7173	0.999462	no	27.9849	26.1801	-0.0961741	0.7195	0.962935	no
NIT1	chr1:161070345-161102478	23.4921	23.795	0.0184873	0.9591	0.999863	no	23.2974	25.4972	0.130167	0.61	0.999462	no	23.8543	20.3659	-0.228094	0.54245	0.911031	no
PFDN2	chr1:161070345-161102478	161.523	154.548	-0.0636826	0.7934	0.999863	no	166.169	148.107	-0.166011	0.37195	0.999462	no	145.589	146.534	0.009334	0.973	0.994443	no
UFC1	chr1:161123533-161128646	216.956	229.909	0.0836585	0.5893	0.999863	no	234.312	229.118	-0.0323399	0.77105	0.999462	no	219.479	224.64	0.0335324	0.8262	0.980276	no
USP21	chr1:161129253-161135516	23.3517	24.251	0.0545182	0.73565	0.999863	no	24.3875	24.6329	0.0144436	0.9007	0.999462	no	21.8898	19.8158	-0.143608	0.39375	0.830369	no
PPOX	chr1:161136180-161141010	12.6927	13.3907	0.0772298	0.66245	0.999863	no	13.8039	14.7336	0.0940283	0.45775	0.999462	no	14.3685	10.6039	-0.43831	0.0172	0.138338	no
B4GALT3	chr1:161141099-161147758	52.8866	52.7892	-0.00265997	0.9859	0.999863	no	54.631	52.1658	-0.0666143	0.55885	0.999462	no	45.2306	33.9959	-0.411937	0.01175	0.105204	no
NDUFS2	chr1:161169104-161184184	133.916	136.373	0.0262357	0.85955	0.999863	no	139.577	143.447	0.0394524	0.73035	0.999462	no	128.716	135.279	0.0717526	0.6502	0.947763	no
APOA2	chr1:161192082-161193418	1.7617	1.6645	-0.0818842	0.8542	0.999863	no	1.61204	0.915423	-0.816379	0.0836	0.999462	no	1.31122	1.14333	-0.197667	0.7505	0.966907	no
MIR5187	chr1:161195832-161208000	111.215	0	-inf	0.2242	0.999863	no	111.168	83.2967	-0.416406	0.80225	0.999462	no	0	57.177	inf	0.23505	0.682743	no
NR1I3	chr1:161195832-161208000	9.24442	10.0461	0.119977	0.79955	0.999863	no	9.19098	8.65422	-0.086815	0.80005	0.999462	no	8.27466	10.1004	0.287644	0.53875	0.910186	no
TOMM40L	chr1:161195832-161208000	26.4076	26.7638	0.0193286	0.91315	0.999863	no	26.4121	23.8988	-0.144264	0.2434	0.999462	no	22.8869	28.7747	0.330278	0.05965	0.326559	no
PCP4L1	chr1:161228516-161255240	0.580927	0.8831	0.60422	0.11065	0.999863	no	0.803464	0.813897	0.0186132	0.92905	0.999462	no	1.14821	0.773941	-0.569095	0.1369	0.522581	no
MPZ	chr1:161274524-161279762	10.6591	10.1593	-0.069296	0.69905	0.999863	no	9.85574	9.27188	-0.0881024	0.49735	0.999462	no	9.12628	6.6497	-0.456737	0.0184	0.145593	no
C1orf192	chr1:161284165-161337673	2.23045	2.20474	-0.0167278	0.6885	0.999863	no	2.22817	2.57887	0.210878	0.8743	0.999462	no	2.75723	2.93546	0.090365	0.9347	0.990235	no
SDHC	chr1:161284165-161337673	46.804	47.7339	0.0283833	0.85795	0.999863	no	46.1512	44.9658	-0.0375394	0.7403	0.999462	no	46.156	52.1687	0.176665	0.268	0.715975	no
UQCRHL	chr1:16133656-16134194	7.89541	6.09662	-0.373004	0.17805	0.999863	no	8.36055	7.56003	-0.145206	0.42985	0.999462	no	7.07771	8.22627	0.216955	0.4329	0.857837	no
HSPA6	chr1:161494035-161496687	1.24781	1.17122	-0.0913892	0.7256	0.999863	no	1.42929	1.14508	-0.319852	0.07225	0.942366	no	1.5087	1.13678	-0.408361	0.1301	0.507383	no
FCGR3A	chr1:161511550-161520413	0.0208181	0.0451181	1.11586	1	1	no	0.0129321	0.0378661	1.54995	1	1	no	0.0522904	0.0153937	-1.7642	1	1	no
[truncated: 21,623 more rows]
