# Supplementary material for: Epigenome-wide effects of vitamin D and their impact on the transcriptome of human monocytes involve CTCF
Source: Oxford University Press journal article supplement (doi:10.1093/nar/gkv1519), 2015-12-28
Supplement: gkv1519_Supplementary_Data.zip [file gkv1519_Supplementary_Data.zip › nar-01887-x-2015-File011.xlsx]

## Sheet: Canonical pathway
	Pvalue_2.5h	Pvalue_4h	Pvalue_24h	Num_genes_2.5h	Num_genes_4h	Num_genes_24h
Canonical pathway	p value (2.5 h)	p value (4 h)	p value (24 h)	No genes (2.5 h)	No genes (4 h)	No genes (24 h)
Oxidative Phosphorylation	1	1	7.94328e-24	0	0	42
Mitochondrial Dysfunction	1	1	1e-22	0	0	50
IL-8 Signaling	0.328852	0.0112202	6.0256e-06	1	6	25
TCA Cycle II (Eukaryotic)	1	1	6.16595e-06	0	0	11
Phospholipase C Signaling	0.0954993	0.102802	1.86209e-05	2	6	30
STAT3 Pathway	1	0.0707946	2.81838e-05	0	3	14
Glucocorticoid Receptor Signaling	1	0.134586	8.12831e-05	0	5	29
Tec Kinase Signaling	1	0.346737	0.00011749	0	3	21
Signaling by Rho Family GTPases	0.395367	0.192309	0.000134896	1	5	27
Ephrin B Signaling	1	0.074131	0.000138038	0	3	13
Axonal Guidance Signaling	0.609537	0.0288403	0.000295121	1	11	41
Thrombin Signaling	0.342768	0.470977	0.000301995	1	3	23
IL-9 Signaling	0.0691831	0.0707946	0.00030903	1	2	8
ILK Signaling	0.33037	1	0.000389045	1	0	22
Role of NFAT in Regulation of the Immune Response	1	1	0.000436516	0	0	21
Interferon Signaling	1	0.0112202	0.000467735	0	3	8
CXCR4 Signaling	1	1	0.000794328	0	0	19
Atherosclerosis Signaling	1	0.00562341	0.000812831	0	5	15
VDR/RXR Activation	0.000630957	8.51138e-06	0.000851138	3	8	12
IL-6 Signaling	0.218776	0.190546	0.00114815	1	2	14
PPAR Signaling	1	0.34435	0.00128825	0	2	13
Molecular Mechanisms of Cancer	0.187068	0.532108	0.00141254	2	5	34
Role of JAK1 and JAK3 in γc Cytokine Signaling	0.125314	0.047863	0.00158489	1	3	10
Role of JAK2 in Hormone-like Cytokine Signaling	0.0724436	0.0104713	0.00204174	1	3	7
CD40 Signaling	1	0.571479	0.00204174	0	1	10
RhoA Signaling	1	1	0.00223872	0	0	15
IL-15 Signaling	1	0.583445	0.0025704	0	1	9
Glioma Invasiveness Signaling	1	0.172982	0.00316228	0	2	9
Notch Signaling	1	0.390841	0.00331131	0	1	7
Gαq Signaling	1	0.142561	0.00338844	0	4	17
Renin-Angiotensin Signaling	1	0.452898	0.00371535	0	2	14
IL-1 Signaling	1	1	0.00389045	0	0	12
Induction of Apoptosis by HIV1	1	1	0.00398107	0	0	9
Growth Hormone Signaling	0.14388	0.0025704	0.00489779	1	5	10
IL-10 Signaling	0.0104713	0.0147911	0.00489779	2	4	10
Hepatic Fibrosis / Hepatic Stellate Cell Activation	0.348337	0.047863	0.00489779	1	5	19
Caveolar-mediated Endocytosis Signaling	1	0.0154882	0.00537032	0	4	10
Gαi Signaling	1	0.213796	0.00537032	0	3	14
Xenobiotic Metabolism Signaling	1	0.280543	0.00537032	0	5	25
Cardiac Hypertrophy Signaling	0.390841	1	0.0057544	1	0	22
TGF-β Signaling	1	1	0.0060256	0	0	11
Prolactin Signaling	0.149279	0.0169824	0.00645654	1	4	10
iCOS-iCOSL Signaling in T Helper Cells	1	0.431519	0.00660693	0	1	12
Airway Pathology in Chronic Obstructive Pulmonary Disease	1	0.1	0.00676083	0	1	2
RAR Activation	1	0.0891251	0.00831764	0	5	18
Breast Cancer Regulation by Stathmin1	0.342768	0.470977	0.00831764	1	3	19
PPARα/RXRα Activation	0.32434	0.0331131	0.00870964	1	6	18
Regulation of the Epithelial-Mesenchymal Transition Pathway	1	1	0.00870964	0	0	18
Role of JAK family kinases in IL-6-type Cytokine Signaling	1	0.278612	0.00891251	0	1	5
TR/RXR Activation	1	0.334965	0.00912011	0	2	10
Production of Nitric Oxide and Reactive Oxygen Species in Macrophages	1	0.433511	0.00977237	0	3	18
Role of NFAT in Cardiac Hypertrophy	1	1	0.00977237	0	0	18
Aryl Hydrocarbon Receptor Signaling	1	0.566239	0.0102329	0	2	15
Role of Macrophages	1	0.203236	0.0107152	0	5	25
Fibroblasts and Endothelial Cells in Rheumatoid Arthritis	1	0.203236	0.0107152	0	5	25
Pancreatic Adenocarcinoma Signaling	0.205116	0.409261	0.0114815	1	2	12
Ephrin Receptor Signaling	1	1	0.0125893	0	0	17
T Helper Cell Differentiation	1	0.0676083	0.0131826	0	2	8
α-Adrenergic Signaling	1	0.131522	0.0131826	0	3	11
JAK/Stat Signaling	1	0.239332	0.0131826	0	2	9
CD28 Signaling in T Helper Cells	1	1	0.0131826	0	0	13
RhoGDI Signaling	0.316957	0.410204	0.0138038	1	3	17
Type II Diabetes Mellitus Signaling	0.254683	0.104954	0.0144544	1	4	14
Adipogenesis pathway	1	0.483059	0.0147911	0	2	13
Role of Tissue Factor in Cancer	0.211836	0.0154882	0.0151356	1	4	11
IGF-1 Signaling	0.189671	0.0398107	0.0151356	1	4	11
Human Embryonic Stem Cell Pluripotency	1	1	0.0151356	0	0	14
CCR5 Signaling in Macrophages	1	0.619441	0.0154882	0	1	9
Gαs Signaling	1	0.180717	0.0162181	0	3	11
Sphingosine-1-phosphate Signaling	1	1	0.0162181	0	0	12
Role of Pattern Recognition Receptors in Recognition of Bacteria and Viruses	1	0.00630957	0.0165959	0	5	12
TNFR2 Signaling	1	0.314775	0.0165959	0	1	5
Chemokine Signaling	1	0.625173	0.0169824	0	1	9
Colorectal Cancer Metastasis Signaling	1	1	0.0169824	0	0	21
Acetate Conversion to Acetyl-CoA	1	1	0.017378	0	0	3
fMLP Signaling in Neutrophils	1	0.0630957	0.018197	0	4	12
Natural Killer Cell Signaling	1	0.187499	0.018197	0	3	12
Paxillin Signaling	1	0.381944	0.0186209	0	2	11
Apoptosis Signaling	1	1	0.0186209	0	0	10
Acute Phase Response Signaling	1	1	0.0190546	0	0	16
Semaphorin Signaling in Neurons	1	0.498884	0.020893	0	1	7
Integrin Signaling	1	1	0.020893	0	0	18
IL-4 Signaling	0.152757	1	0.0213796	1	0	9
Relaxin Signaling	1	1	0.0213796	0	0	14
Leukocyte Extravasation Signaling	1	0.0501187	0.0229087	0	6	18
PI3K Signaling in B Lymphocytes	0.246604	0.248313	0.0234423	1	3	13
Cholecystokinin/Gastrin-mediated Signaling	1	1	0.0239883	0	0	11
PTEN Signaling	1	1	0.0245471	0	0	12
Macropinocytosis Signaling	0.134586	0.0588844	0.0263027	1	3	8
Calcium-induced T Lymphocyte Apoptosis	1	0.220293	0.0263027	0	2	8
GNRH Signaling	1	1	0.0263027	0	0	13
cAMP-mediated signaling	1	0.0263027	0.0275423	0	7	18
CCR3 Signaling in Eosinophils	1	0.470977	0.0275423	0	2	12
PKCθ Signaling in T Lymphocytes	1	1	0.0275423	0	0	12
Role of IL-17A in Psoriasis	1	0.155955	0.0281838	0	1	2
B Cell Receptor Signaling	1	1	0.0301995	0	0	16
Erythropoietin Signaling	1	0.229615	0.030903	0	2	8
Heparan Sulfate Biosynthesis (Late Stages)	1	0.530884	0.0323594	0	1	7
Nur77 Signaling in T Lymphocytes	1	0.530884	0.0323594	0	1	7
Regulation of Cellular Mechanics by Calpain Protease	1	0.530884	0.0323594	0	1	7
Type I Diabetes Mellitus Signaling	1	1	0.0323594	0	0	11
Ceramide Signaling	1	1	0.0323594	0	0	9
GDNF Family Ligand-Receptor Interactions	0.139959	0.234423	0.0331131	1	2	8
Gluconeogenesis I	0.0933254	0.451856	0.0331131	1	1	5
IL-17A Signaling in Fibroblasts	1	0.366438	0.0354813	0	1	5
LXR/RXR Activation	0.238232	0.025704	0.0380189	1	5	12
Androgen Signaling	1	0.435512	0.0380189	0	2	11
G Protein Signaling Mediated by Tubby	1	0.374973	0.0389045	0	1	5
IL-17A Signaling in Gastric Cells	1	0.0416869	0.0398107	0	1	3
P2Y Purigenic Receptor Signaling Pathway	1	1	0.0398107	0	0	12
G-Protein Coupled Receptor Signaling	1	0.057544	0.040738	0	7	20
NF-κB Activation by Viruses	1	0.248886	0.040738	0	2	8
Small Cell Lung Cancer Signaling	1	1	0.040738	0	0	8
TNFR1 Signaling	1	0.472063	0.042658	0	1	6
T Cell Receptor Signaling	1	1	0.042658	0	0	10
Huntington's Disease Signaling	1	0.365595	0.0446684	0	4	19
TREM1 Signaling	0.149279	0.0169824	0.0467735	1	3	7
Gα12/13 Signaling	1	0.452898	0.047863	0	2	11
LPS/IL-1 Mediated Inhibition of RXR Function	0.0812831	0.0707946	0.0489779	2	6	18
Parkinson's Signaling	1	1	0.0489779	0	0	3
Glutathione Redox Reactions II	1	1	0.0489779	0	0	1
Acute Myeloid Leukemia Signaling	1	0.63387	0.0501187	0	1	8
PAK Signaling	1	1	0.0501187	0	0	9
Inhibition of Angiogenesis by TSP1	1	0.399025	0.0524807	0	1	5
HMGB1 Signaling	1	0.462381	0.0524807	0	1	10
Reelin Signaling in Neurons	0.154525	0.272898	0.0562341	1	2	8
Glioblastoma Multiforme Signaling	1	1	0.0562341	0	0	13
Amyotrophic Lateral Sclerosis Signaling	1	1	0.0562341	0	0	10
Regulation of Actin-based Motility by Rho	1	1	0.0562341	0	0	9
Oxidative Ethanol Degradation III	1	1	0.057544	0	0	3
FXR/RXR Activation	0.254683	0.104954	0.0616595	1	4	12
Thyroid Cancer Signaling	1	0.414	0.0630957	0	1	5
Regulation of IL-2 Expression in Activated and Anergic T Lymphocytes	1	1	0.0630957	0	0	8
Unfolded protein response	1	0.154882	0.0645654	0	2	6
IL-12 Signaling and Production in Macrophages	1	0.539511	0.0645654	0	2	12
Ethanol Degradation IV	1	1	0.0645654	0	0	4
Extrinsic Prothrombin Activation Pathway	0.0371535	0.0223872	0.0660693	1	2	3
p70S6K Signaling	0.233346	0.483059	0.0660693	1	2	11
IL-2 Signaling	1	1	0.0691831	0	0	6
Heparan Sulfate Biosynthesis	1	0.594292	0.0707946	0	1	7
G Beta Gamma Signaling	0.188365	0.363078	0.074131	1	2	9
Fcγ Receptor-mediated Phagocytosis in Macrophages and Monocytes	1	0.0398107	0.0776247	0	4	9
Actin Cytoskeleton Signaling	0.0794328	0.322107	0.0776247	2	4	17
Rapoport-Luebering Glycolytic Shunt	1	1	0.0776247	0	0	2
2-ketoglutarate Dehydrogenase Complex	1	1	0.0776247	0	0	2
IL-3 Signaling	1	0.603949	0.0794328	0	1	7
Non-Small Cell Lung Cancer Signaling	1	1	0.0794328	0	0	7
PEDF Signaling	1	1	0.0794328	0	0	7
Glioma Signaling	1	1	0.0812831	0	0	9
Fc Epsilon RI Signaling	1	0.187499	0.0831764	0	3	10
Role of Osteoblasts	1	1	0.0870964	0	0	17
Osteoclasts and Chondrocytes in Rheumatoid Arthritis	1	1	0.0870964	0	0	17
LPS-stimulated MAPK Signaling	0.14388	0.244343	0.0891251	1	2	7
GABA Receptor Signaling	1	0.615177	0.0891251	0	1	7
Epithelial Adherens Junction Signaling	1	1	0.0912011	0	0	12
Germ Cell-Sertoli Cell Junction Signaling	1	1	0.0912011	0	0	13
D-myo-inositol (1,4,5,6)-Tetrakisphosphate Biosynthesis	1	0.248313	0.0933254	0	3	11
D-myo-inositol (3,4,5,6)-tetrakisphosphate Biosynthesis	1	0.248313	0.0933254	0	3	11
Ovarian Cancer Signaling	1	1	0.0933254	0	0	11
CTLA4 Signaling in Cytotoxic T Lymphocytes	1	1	0.0933254	0	0	8
Toll-like Receptor Signaling	0.145546	0.248886	0.0954993	1	2	7
Vitamin-C Transport	1	1	0.0954993	0	0	2
EGF Signaling	1	1	0.0954993	0	0	6
Thymine Degradation	1	1	0.0954993	0	0	1
Neuropathic Pain Signaling In Dorsal Horn Neurons	1	1	0.0977237	0	0	9
FGF Signaling	1	1	0.0977237	0	0	8
iNOS Signaling	0.0954993	0.458142	0.100462	1	1	5
Dermatan Sulfate Biosynthesis (Late Stages)	1	0.458142	0.100462	0	1	5
Oncostatin M Signaling	1	1	0.102329	0	0	4
HER-2 Signaling in Breast Cancer	1	0.258226	0.105682	0	2	7
Corticotropin Releasing Hormone Signaling	1	0.466659	0.106414	0	2	10
Dermatan Sulfate Degradation (Metazoa)	1	0.0323594	0.107152	0	2	3
3-phosphoinositide Biosynthesis	1	0.371535	0.107895	0	3	13
Superpathway of Geranylgeranyldiphosphate Biosynthesis I (via Mevalonate)	1	0.366438	0.110917	0	1	3
Cell Cycle Regulation by BTG Family Proteins	1	0.366438	0.110917	0	1	4
Uracil Degradation II (Reductive)	1	1	0.111686	0	0	1
Rac Signaling	1	0.404576	0.111944	0	2	9
Factors Promoting Cardiogenesis in Vertebrates	1	0.11722	0.11246	0	3	8
PCP pathway	1	0.196336	0.114025	0	2	6
GM-CSF Signaling	1	1	0.114025	0	0	6
Wnt/β-catenin Signaling	1	0.179473	0.11508	0	4	13
HGF Signaling	1	0.409261	0.11695	0	2	9
Activation of IRF by Cytosolic Pattern Recognition Receptors	1	0.201372	0.120781	0	2	6
Ephrin A Signaling	1	0.479733	0.122462	0	1	5
Cardiac β-adrenergic Signaling	1	1	0.125893	0	0	11
NF-κB Signaling	1	0.389045	0.126765	0	3	13
Virus Entry via Endocytic Pathways	1	0.125603	0.128529	0	3	8
Retinoate Biosynthesis I	1	1	0.129122	0	0	4
Acetyl-CoA Biosynthesis I (Pyruvate Dehydrogenase Complex)	1	1	0.12942	0	0	2
IL-22 Signaling	1	0.268534	0.130617	0	1	3
Cellular Effects of Sildenafil (Viagra)	1	1	0.130617	0	0	11
JAK2 and TYK2 in Interferon Signaling	1	1	0.130617	0	0	3
Role of JAK1	1	1	0.130617	0	0	3
Tumoricidal Function of Hepatic Natural Killer Cells	1	1	0.130617	0	0	3
Antiproliferative Role of Somatostatin Receptor 2	1	1	0.141254	0	0	6
Protein Kinase A Signaling	1	0.40738	0.148252	0	6	26
Lanosterol Biosynthesis	1	1	0.149968	0	0	1
Dendritic Cell Maturation	1	0.410204	0.152055	0	3	13
CREB Signaling in Neurons	1	1	0.152055	0	0	13
Chondroitin Sulfate Biosynthesis (Late Stages)	1	0.154882	0.154882	0	2	5
Antiproliferative Role of TOB in T Cell Signaling	1	1	0.155597	0	0	3
Role of PKR in Interferon Induction and Antiviral Response	1	1	0.158489	0	0	4
B Cell Activating Factor Signaling	1	1	0.158489	0	0	4
AMPK Signaling	0.271644	0.128529	0.164437	1	4	11
Aspartate Degradation II	1	1	0.166725	0	0	2
Mevalonate Pathway I	1	0.297167	0.168267	0	1	2
The Visual Cycle	1	1	0.168267	0	0	2
Melanocyte Development and Pigmentation Signaling	1	1	0.168267	0	0	7
Glycolysis I	0.0831764	0.414	0.168655	1	1	4
D-myo-inositol-5-phosphate Metabolism	1	0.30761	0.169434	0	3	11
Role of IL-17A in Arthritis	1	0.164059	0.172187	0	1	4
Actin Nucleation by ARP-WASP Complex	1	1	0.172187	0	0	5
3-phosphoinositide Degradation	1	0.311172	0.174582	0	3	11
14-3-3-mediated Signaling	1	1	0.177011	0	0	9
Gap Junction Signaling	1	1	0.177828	0	0	12
IL-17 Signaling	1	0.0676083	0.179061	0	2	5
Retinol Biosynthesis	1	0.102802	0.179473	0	2	3
UVC-Induced MAPK Signaling	1	0.421697	0.179473	0	1	4
Cdc42 Signaling	0.302691	1	0.18281	1	0	12
Endothelin-1 Signaling	1	0.433511	0.184927	0	3	13
Prostanoid Biosynthesis	1	1	0.18578	0	0	2
RANK Signaling in Osteoclasts	1	1	0.189671	0	0	7
Ethanol Degradation II	1	1	0.190108	0	0	4
Myc Mediated Apoptosis Signaling	1	1	0.190108	0	0	5
eNOS Signaling	1	0.322107	0.190546	0	3	11
Thrombopoietin Signaling	1	0.537032	0.199526	0	1	5
Granzyme B Signaling	1	1	0.205589	0	0	2
Intrinsic Prothrombin Activation Pathway	0.0616595	0.323594	0.20893	1	1	3
Death Receptor Signaling	1	0.334965	0.211836	0	2	7
Docosahexaenoic Acid (DHA) Signaling	1	1	0.212324	0	0	4
Role of Oct4 in Mammalian Embryonic Stem Cell Pluripotency	1	1	0.223357	0	0	4
4-1BB Signaling in T Lymphocytes	1	1	0.223357	0	0	3
Hepatic Cholestasis	0.314051	0.0281838	0.225424	1	5	11
mTOR Signaling	0.338844	0.244343	0.225424	1	4	13
MSP-RON Signaling Pathway	1	0.12388	0.234963	0	2	4
Granulocyte Adhesion and Diapedesis	1	0.0831764	0.236592	0	4	11
Acetone Degradation I (to Methylglyoxal)	1	1	0.237137	0	0	2
Cytotoxic T Lymphocyte-mediated Apoptosis of Target Cells	1	1	0.237137	0	0	3
Airway Inflammation in Asthma	1	1	0.237684	0	0	1
Ketogenesis	1	0.209411	0.244906	0	1	2
Tryptophan Degradation to 2-amino-3-carboxymuconate Semialdehyde	1	1	0.244906	0	0	1
Sphingosine and Sphingosine-1-phosphate Metabolism	1	1	0.244906	0	0	1
Superpathway of Inositol Phosphate Compounds	1	0.529663	0.246037	0	3	14
Role of BRCA1 in DNA Damage Response	0.127057	0.566239	0.248313	1	1	5
Eicosanoid Signaling	1	0.020893	0.25527	0	4	6
p53 Signaling	1	1	0.259418	0	0	7
Fatty Acid Activation	1	1	0.26485	0	0	2
GADD45 Signaling	1	1	0.26485	0	0	2
Oleate Biosynthesis II (Animals)	1	1	0.26485	0	0	2
Complement System	1	0.358096	0.266073	0	1	3
TWEAK Signaling	1	0.358096	0.266073	0	1	3
NAD biosynthesis II (from tryptophan)	1	0.358096	0.266073	0	1	2
Estrogen-Dependent Breast Cancer Signaling	1	1	0.268534	0	0	5
PDGF Signaling	1	1	0.273527	0	0	6
Hereditary Breast Cancer Signaling	0.220293	1	0.276694	1	0	8
Alanine Degradation III	1	1	0.277971	0	0	1
Alanine Biosynthesis II	1	1	0.277971	0	0	1
L-serine Degradation	1	1	0.277971	0	0	1
Calcium Signaling	1	1	0.277971	0	0	12
Coagulation System	0.0724436	0.0758578	0.280543	1	2	3
Angiopoietin Signaling	1	1	0.289068	0	0	5
CD27 Signaling in Lymphocytes	1	1	0.293765	0	0	4
Chondroitin Sulfate Biosynthesis	1	0.224905	0.299226	0	2	5
ErbB Signaling	0.167109	0.306196	0.301301	1	2	6
Antioxidant Action of Vitamin C	1	0.386367	0.301301	0	2	6
CDK5 Signaling	1	1	0.301301	0	0	7
Agranulocyte Adhesion and Diapedesis	1	0.447713	0.302691	0	2	11
Mitochondrial L-carnitine Shuttle Pathway	1	1	0.304789	0	0	2
UVB-Induced MAPK Signaling	1	0.498884	0.306196	0	1	4
Dermatan Sulfate Biosynthesis	1	0.229615	0.309742	0	2	5
Bladder Cancer Signaling	1	0.311172	0.310456	0	1	5
Glutamate Biosynthesis II	1	1	0.3155	0	0	1
Glutamate Degradation X	1	1	0.3155	0	0	1
GDP-L-fucose Biosynthesis I (from GDP-D-mannose)	1	1	0.3155	0	0	1
Aspartate Biosynthesis	1	1	0.3155	0	0	1
Proline Degradation	1	1	0.3155	0	0	1
Glutamine Biosynthesis I	1	1	0.3155	0	0	1
Thyroid Hormone Biosynthesis	1	1	0.3155	0	0	1
Chondroitin Sulfate Degradation (Metazoa)	1	0.0323594	0.32434	0	2	2
Zymosterol Biosynthesis	1	0.249459	0.32434	0	1	1
Methylglyoxal Degradation III	1	1	0.32434	0	0	1
April Mediated Signaling	1	1	0.32434	0	0	3
UVA-Induced MAPK Signaling	1	0.320627	0.328852	0	2	6
PXR/RXR Activation	1	0.239332	0.33037	0	2	5
Cholesterol Biosynthesis II (via 24,25-dihydrolanosterol)	1	0.399025	0.339625	0	1	2
Cholesterol Biosynthesis I	1	0.399025	0.339625	0	1	2
Cholesterol Biosynthesis III (via Desmosterol)	1	0.399025	0.339625	0	1	2
Lymphotoxin β Receptor Signaling	1	0.5188	0.341979	0	1	4
Differential Regulation of Cytokine Production in Intestinal Epithelial Cells by IL-17A and IL-17F	1	0.259418	0.34435	0	1	2
Polyamine Regulation in Colon Cancer	1	1	0.34435	0	0	2
Glycine Betaine Degradation	1	1	0.34435	0	0	2
Pyridoxal 5'-phosphate Salvage Pathway	1	0.0707946	0.35156	0	3	5
Superoxide Radicals Degradation	1	1	0.35156	0	0	1
Geranylgeranyldiphosphate Biosynthesis	1	1	0.35156	0	0	1
Thioredoxin Pathway	1	1	0.35156	0	0	1
Trehalose Degradation II (Trehalase)	1	1	0.35156	0	0	1
Morphine Biosynthesis	1	1	0.35156	0	0	1
Formaldehyde Oxidation II (Glutathione-dependent)	1	1	0.35156	0	0	1
NRF2-mediated Oxidative Stress Response	1	0.205589	0.352371	0	4	11
Inhibition of Matrix Metalloproteases	1	0.406443	0.353997	0	1	3
Synaptic Long Term Potentiation	1	1	0.355631	0	0	8
PI3K/AKT Signaling	1	1	0.363078	0	0	8
γ-linolenate Biosynthesis II (Animals)	1	1	0.363915	0	0	2
Estrogen-mediated S-phase Entry	1	1	0.363915	0	0	2
Chronic Myeloid Leukemia Signaling	1	1	0.367282	0	0	6
Nitric Oxide Signaling in the Cardiovascular System	1	1	0.378443	0	0	7
Leukotriene Biosynthesis	1	0.278612	0.382825	0	1	2
Glutathione Redox Reactions I	1	1	0.382825	0	0	1
Pathogenesis of Multiple Sclerosis	0.0190546	0.00562341	0.386367	1	2	1
SAPK/JNK Signaling	0.18281	0.34914	0.386367	1	2	6
Epoxysqualene Biosynthesis	1	1	0.386367	0	0	1
1D-myo-inositol Hexakisphosphate Biosynthesis V (from Ins(1,3,4)P3)	1	1	0.386367	0	0	1
Glutamate Degradation II	1	1	0.386367	0	0	1
α-tocopherol Degradation	1	1	0.386367	0	0	1
L-cysteine Degradation III	1	1	0.386367	0	0	1
1,25-dihydroxyvitamin D3 Biosynthesis	1	1	0.386367	0	0	1
Tight Junction Signaling	0.299226	1	0.387258	1	0	10
Leptin Signaling in Obesity	1	1	0.394457	0	0	5
Fatty Acid β-oxidation I	1	1	0.397192	0	0	3
Maturity Onset Diabetes of Young (MODY) Signaling	1	0.28774	0.401791	0	1	2
Lipid Antigen Presentation by CD1	1	1	0.401791	0	0	2
Citrulline Biosynthesis	1	1	0.401791	0	0	1
VEGF Signaling	1	1	0.405509	0	0	6
MIF Regulation of Innate Immunity	0.0891251	0.111173	0.412098	1	2	3
Melanoma Signaling	1	1	0.412098	0	0	3
IL-15 Production	1	1	0.420727	0	0	2
1D-myo-inositol Hexakisphosphate Biosynthesis II (Mammalian)	1	1	0.420727	0	0	2
Bupropion Degradation	1	1	0.420727	0	0	2
p38 MAPK Signaling	1	0.448745	0.422669	0	2	7
Telomerase Signaling	1	1	0.42462	0	0	6
Role of Hypercytokinemia/hyperchemokinemia in the Pathogenesis of Influenza	0.0912011	0.00269153	0.42658	1	3	2
ERK/MAPK Signaling	1	0.450817	0.42658	0	3	11
FcγRIIB Signaling in B Lymphocytes	1	1	0.42658	0	0	3
Role of RIG1-like Receptors in Antiviral Innate Immunity	1	1	0.42658	0	0	3
ERK5 Signaling	1	0.201372	0.438531	0	2	4
Glutamate Receptor Signaling	1	1	0.438531	0	0	4
Neuroprotective Role of THOP1 in Alzheimer's Disease	1	0.451856	0.440555	0	1	3
Estrogen Biosynthesis	1	1	0.440555	0	0	2
Superpathway of Cholesterol Biosynthesis	1	0.292415	0.446684	0	2	4
L-glutamine Biosynthesis II (tRNA-dependent)	1	1	0.448745	0	0	1
Ascorbate Recycling (Cytosolic)	1	1	0.448745	0	0	1
Tetrahydrobiopterin Biosynthesis I	1	1	0.448745	0	0	1
L-cysteine Degradation I	1	1	0.448745	0	0	1
Pentose Phosphate Pathway (Oxidative Branch)	1	1	0.448745	0	0	1
D-glucuronate Degradation I	1	1	0.448745	0	0	1
Isoleucine Degradation I	1	1	0.457088	0	0	2
Insulin Receptor Signaling	0.257632	0.109144	0.460257	1	4	8
HIF1α Signaling	1	1	0.470977	0	0	6
Triacylglycerol Degradation	1	0.057544	0.474242	0	2	2
Prostate Cancer Signaling	1	1	0.477529	0	0	5
NAD Biosynthesis III	1	0.144877	0.47863	0	1	1
Heme Degradation	1	0.144877	0.47863	0	1	1
Tetrahydrobiopterin Biosynthesis II	1	1	0.47863	0	0	1
Palmitate Biosynthesis I (Animals)	1	1	0.47863	0	0	1
Graft-versus-Host Disease Signaling	1	1	0.481948	0	0	3
Stearate Biosynthesis I (Animals)	1	1	0.481948	0	0	2
Role of PI3K/AKT Signaling in the Pathogenesis of Influenza	1	1	0.485289	0	0	4
HIPPO signaling	1	1	0.488652	0	0	5
NAD Salvage Pathway III	1	0.155955	0.505825	0	1	1
Dolichol and Dolichyl Phosphate Biosynthesis	1	1	0.505825	0	0	1
Ceramide Degradation	1	1	0.505825	0	0	1
Pregnenolone Biosynthesis	1	1	0.505825	0	0	1
Agrin Interactions at Neuromuscular Junction	1	1	0.508159	0	0	4
Phenylalanine Degradation IV (Mammalian	1	1	0.509331	0	0	2
via Side Chain)	1	1	0.509331	0	0	2
Crosstalk between Dendritic Cells and Natural Killer Cells	1	1	0.5188	0	0	5
FAK Signaling	1	1	0.5188	0	0	5
Role of MAPK Signaling in the Pathogenesis of Influenza	1	0.0645654	0.519996	0	3	4
nNOS Signaling in Neurons	1	0.493174	0.522396	0	1	3
CNTF Signaling	1	1	0.522396	0	0	3
DNA Double-Strand Break Repair by Homologous Recombination	1	1	0.532108	0	0	1
Proline Biosynthesis I	1	1	0.532108	0	0	1
Spermine and Spermidine Degradation I	1	1	0.532108	0	0	1
Galactose Degradation I (Leloir Pathway)	1	1	0.532108	0	0	1
Ceramide Biosynthesis	1	1	0.532108	0	0	1
dTMP De Novo Biosynthesis	1	1	0.532108	0	0	1
Clathrin-mediated Endocytosis Signaling	1	1	0.535797	0	0	10
Regulation of eIF4 and p70S6K Signaling	0.273527	1	0.539511	1	0	8
B Cell Development	1	0.358096	0.542001	0	1	2
Renal Cell Carcinoma Signaling	1	1	0.542001	0	0	4
Salvage Pathways of Pyrimidine Ribonucleotides	1	0.057544	0.544503	0	4	6
Neuregulin Signaling	0.179473	0.11995	0.548277	1	3	5
Endometrial Cancer Signaling	1	1	0.548277	0	0	3
Serotonin Receptor Signaling	1	1	0.548277	0	0	3
FLT3 Signaling in Hematopoietic Progenitor Cells	1	0.619441	0.55335	0	1	4
MIF-mediated Glucocorticoid Regulation	0.0724436	0.0758578	0.557186	1	2	2
Telomere Extension by Telomerase	1	1	0.557186	0	0	1
Valine Degradation I	1	1	0.557186	0	0	2
Arginine Degradation VI (Arginase 2 Pathway)	1	1	0.579429	0	0	1
GDP-glucose Biosynthesis	1	1	0.579429	0	0	1
Citrulline-Nitric Oxide Cycle	1	1	0.579429	0	0	1
Antigen Presentation Pathway	1	1	0.588844	0	0	2
NAD Biosynthesis from 2-amino-3-carboxymuconate Semialdehyde	1	0.199067	0.60256	0	1	1
Lysine Degradation II	1	1	0.60256	0	0	1
Adenine and Adenosine Salvage III	1	1	0.60256	0	0	1
Differential Regulation of Cytokine Production in Macrophages and T Helper Cells by IL-17A and IL-17F	1	0.209411	0.623735	0	1	1
Ketolysis	1	1	0.623735	0	0	1
Role of IL-17F in Allergic Inflammatory Airway Diseases	1	0.0190546	1	0	2	0
Phospholipases	1	0.0562341	1	0	3	0
NAD Salvage Pathway II	1	0.0758578	1	0	2	0
Communication between Innate and Adaptive Immune Cells	1	0.11722	1	0	2	0
Chondroitin and Dermatan Biosynthesis	1	0.155955	1	0	1	0
Retinoic acid Mediated Apoptosis Signaling	1	0.215278	1	0	2	0
NAD Phosphorylation and Dephosphorylation	1	0.229615	1	0	1	0
Choline Biosynthesis III	1	0.249459	1	0	1	0
Sperm Motility	1	0.25527	1	0	3	0
Urate Biosynthesis/Inosine 5'-phosphate Degradation	1	0.259418	1	0	1	0
Guanosine Nucleotides Degradation III	1	0.259418	1	0	1	0
VEGF Family Ligand-Receptor Interactions	1	0.287078	1	0	2	0
Adenosine Nucleotides Degradation II	1	0.306196	1	0	1	0
Aldosterone Signaling in Epithelial Cells	1	0.349945	1	0	3	0
Purine Nucleotides Degradation II (Aerobic)	1	0.382825	1	0	1	0
Pyrimidine Ribonucleotides Interconversion	1	0.390841	1	0	1	0
Pyrimidine Deoxyribonucleotides De Novo Biosynthesis I	1	0.406443	1	0	1	0
Mechanisms of Viral Exit from Host Cells	1	0.414	1	0	1	0
Netrin Signaling	1	0.436516	1	0	1	0
Hematopoiesis from Pluripotent Stem Cells	1	0.486407	1	0	1	0
Pyrimidine Ribonucleotides De Novo Biosynthesis	1	0.486407	1	0	1	0
Primary Immunodeficiency Signaling	1	0.493174	1	0	1	0
Role of Cytokines in Mediating Communication between Immune Cells	1	0.5188	1	0	1	0
Phototransduction Pathway	1	0.549541	1	0	1	0
ErbB4 Signaling	1	0.554626	1	0	1	0
Synaptic Long Term Depression	1	0.580764	1	0	2	0
Melatonin Signaling	1	0.629506	1	0	1	0
BMP signaling pathway	1	0.63387	1	0	1	0
Protein Ubiquitination Pathway	0.42462	1	1	1	0	0

## Sheet: Biofunction
Biofunction	p value (2.5 h)	p value (4 h)	p value (24 h)	No genes (2.5 h)	No genes (4 h)	No genes (24 h)
Connective Tissue Disorders	0.0128871	1.01364e-05	4.88072e-10	7	45	27
Hepatic System Disease	0.00906714	3.2135e-05	6.96e-10	6	15	418
Skeletal and Muscular Disorders	0.01373	1.39026e-05	2.44605e-09	4	45	27
Infectious Disease	0.0112072	1.57903e-05	3.21857e-09	10	28	61
Antimicrobial Response	0.00118	2.69e-05	4.59e-09	2	10	39
Psychological Disorders	0.01472	1	1.024e-08	1	0	100
Organismal Survival	0.00537425	1.77059e-06	5.239e-08	10	40	107
Renal and Urological Disease	0.00987375	1.8395e-07	7.82671e-08	3	58	195
Organismal Functions	0.0110937	2.02e-05	9.12e-08	7	11	30
Free Radical Scavenging	0.0184	1	1.01167e-07	2	0	59
Dermatological Diseases and Conditions	0.008446	1.75e-05	1.49284e-07	8	36	92
Hepatic System Development and Function	0.01088	3.56205e-06	2.33e-07	4	5	32
Immune Cell Trafficking	0.0115702	1.70082e-05	2.88965e-07	8	51	148
Cancer	0.0143359	1.37722e-05	3.43814e-07	40	242	983
Amino Acid Metabolism	1	1	3.51e-07	0	0	32
Cell Death and Survival	0.0114662	1.89587e-05	3.51592e-07	13	96	373
Gastrointestinal Disease	0.0115271	1.31425e-05	3.54608e-07	31	180	691
Reproductive System Disease	0.012975	1.56827e-05	3.8249e-07	5	32	97
Cellular Movement	0.01055	1.83022e-05	4.27093e-07	15	98	281
Neurological Disease	0.0110418	2.54723e-05	4.58857e-07	5	18	92
Hematological System Development and Function	0.0130085	1.39695e-05	4.76937e-07	14	60	155
Cellular Function and Maintenance	0.0128181	7.64386e-06	5.16766e-07	16	36	111
Inflammatory Response	0.010677	1.56484e-05	5.33303e-07	12	49	63
Cellular Assembly and Organization	0.01486	2.57848e-05	5.52343e-07	8	52	161
Tissue Morphology	0.0163228	1.26336e-05	6.06884e-07	11	60	155
Respiratory Disease	0.0145122	4.70468e-06	6.15671e-07	7	14	27
Lymphoid Tissue Structure and Development	0.019975	1.38142e-05	6.36869e-07	3	22	67
Organ Morphology	0.0161278	1.9922e-05	6.44801e-07	8	10	67
Cell-To-Cell Signaling and Interaction	0.011794	1.23148e-05	6.5529e-07	12	27	63
Inflammatory Disease	0.012875	1.73705e-05	7.28373e-07	8	44	27
Protein Synthesis	0.00950714	1.0772e-05	7.40997e-07	6	28	75
Hematopoiesis	0.0153783	1.73062e-05	8.14987e-07	9	35	80
Cellular Growth and Proliferation	0.0105332	1.99139e-05	8.15949e-07	22	138	436
Organismal Development	0.0130228	1.07674e-05	8.39838e-07	14	50	146
Organismal Injury and Abnormalities	0.00966588	1.92051e-05	8.57492e-07	17	29	195
Cellular Development	0.0134658	1.51363e-05	9.30689e-07	17	49	270
Cell Cycle	0.0102097	2.942e-05	9.4075e-07	5	38	16
Cell Morphology	0.0098286	1.66432e-05	9.50267e-07	15	81	233
Immunological Disease	0.0122373	2.41461e-05	9.52816e-07	7	53	77
Gene Expression	0.00212	1.66896e-05	9.97153e-07	1	71	82
Endocrine System Disorders	0.00918571	5.985e-08	1.0014e-06	4	43	170
Post-Translational Modification	1	3.68e-07	1.0255e-06	0	30	32
Tissue Development	0.0133506	1.72443e-05	1.06976e-06	15	30	91
Organ Development	0.0154029	3.9688e-05	1.14035e-06	11	15	53
Cardiovascular Disease	0.0109641	1.31839e-05	1.2469e-06	11	63	137
Nervous System Development and Function	0.0118469	4.87133e-06	1.26264e-06	2	28	87
Vitamin and Mineral Metabolism	0.01309	3.9355e-05	1.29e-06	7	22	50
Hypersensitivity Response	0.009525	8.2e-06	1.298e-06	1	12	24
Cellular Compromise	0.0106671	1.45052e-05	1.41736e-06	11	20	43
Cardiovascular System Development and Function	0.0124781	1.14759e-05	1.6278e-06	12	57	106
Carbohydrate Metabolism	0.00815635	1.89922e-05	1.72737e-06	10	33	52
Molecular Transport	0.0133757	3.08753e-05	1.80579e-06	11	28	52
Tumor Morphology	0.01725	2.2765e-05	1.90803e-06	3	15	66
Embryonic Development	0.0129784	3.90402e-05	1.9504e-06	12	46	53
Skeletal and Muscular System Development and Function	0.0144677	1.056e-05	2.09238e-06	7	22	50
Hematological Disease	0.0142578	2.48785e-05	2.1237e-06	12	45	141
Humoral Immune Response	0.0213	5.65072e-05	2.21602e-06	2	17	53
Cell-mediated Immune Response	0.01569	2.04842e-05	2.21603e-06	4	28	83
Small Molecule Biochemistry	0.011378	2.88204e-05	2.58261e-06	13	22	52
Hereditary Disorder	0.00724444	1	2.60135e-06	8	0	80
Connective Tissue Development and Function	0.0121703	8.27e-06	2.72766e-06	8	13	38
Cell Signaling	0.0158025	3.14927e-05	2.772e-06	7	22	50
Metabolic Disease	0.00846	2.72718e-05	3.145e-06	8	49	133
Lipid Metabolism	0.0107515	2.80851e-05	3.31965e-06	7	37	79
Developmental Disorder	0.008199	7.0475e-06	3.52667e-06	7	23	65
Reproductive System Development and Function	0.0118316	1	4.12e-06	3	0	94
Renal and Urological System Development and Function	0.0175	1	4.12e-06	1	0	94
Nutritional Disease	0.0272	1.48e-06	4.74e-06	1	22	54
Energy Production	0.0130383	1	5.66e-06	5	0	33
Digestive System Development and Function	0.0130843	1.13735e-05	1	5	5	0
Respiratory System Development and Function	0.01995	1.41333e-05	1	3	16	0
Visual System Development and Function	0.00983	8.31e-05	1	1	4	0
Antigen Presentation	0.00424	1	1	1	0	0
Auditory Disease	0.00564333	1	1	2	0	0
Ophthalmic Disease	0.0092075	1	1	3	0	0
Behavior	0.0115293	1	1	3	0	0
Recombination	0.0136467	1	1	4	0	0
and Repair	0.0136467	1	1	4	0	0
DNA Replication	0.0136467	1	1	4	0	0
Hair and Skin Development and Function	0.0173375	1	1	4	0	0
Endocrine System Development and Function	0.0179	1	1	2	0	0
Nucleic Acid Metabolism	0.0244	1	1	4	0	0

## Sheet: Disease
Disease	p value (2.5 h)	p value (4 h)	p value (24 h)	No genes (2.5 h)	No genes (4 h)	No genes (24 h)
cancer	0.00778	2.14e-11	1.52e-41	40	242	983
malignant solid tumor	0.00574	9.37e-11	1.6e-37	39	233	944
solid tumor	1	1	2.71e-37	0	0	946
proliferation of cells	0.00268	2.05e-21	1.68e-30	20	138	436
cell movement	0.00199	1.43e-21	1.99e-27	14	98	281
migration of cells	0.00225	1.72e-21	3.59e-26	13	92	258
neoplasia of epithelial tissue	0.00763	2.04e-09	7.52e-26	35	207	819
quantity of leukocytes	1	9.67e-17	8.94e-26	0	54	155
quantity of blood cells	1	6.92e-18	1.03e-25	0	60	169
abdominal cancer	0.00147	1.99e-09	6.77e-25	36	203	799
abdominal neoplasm	1	2.58e-10	8.75e-25	0	207	805
carcinoma	0.0115	7.97e-09	1.14e-23	34	202	798
differentiation of cells	0.0058	8.98e-14	6.66e-23	13	83	270
function of blood cells	1	2.56e-12	9.14e-23	0	36	111
quantity of cells	1	3.83e-15	1.18e-22	0	75	230
leukocyte migration	0.00421	3.78e-17	4.31e-22	8	55	148
quantity of mononuclear leukocytes	1	4.3e-12	1e-21	0	40	124
digestive tract cancer	0.0262	2.31e-09	1.63e-21	29	180	691
function of leukocytes	1	3.32e-12	2.39e-21	0	34	102
digestive organ tumor	1	4.92e-09	5.98e-21	0	180	693
quantity of lymphocytes	1	1.8e-11	1.44e-19	0	39	117
cell death	1	1.55e-11	6.14e-18	0	110	373
breast or colorectal cancer	1	9.44e-08	6.73e-18	0	132	500
function of phagocytes	1	1.13e-07	1.8e-17	0	19	64
cell movement of leukocytes	0.00729	3.57e-17	2.23e-17	7	51	124
function of myeloid cells	1	1.02e-06	3.27e-17	0	15	54
apoptosis	1	8.56e-13	3.84e-17	0	96	305
necrosis	1	4.57e-13	5.6e-17	0	96	302
immune response of leukocytes	0.00129	2.59e-14	6.12e-17	5	27	63
gastrointestinal neoplasia	1	1.18e-06	7.94e-17	0	120	463
Gastrointestinal Tract Cancer and Tumors	1	7.61e-07	8.56e-17	0	120	460
hypersensitive reaction	1	1.2e-10	1.71e-16	0	27	77
quantity of phagocytes	0.0234	4.06e-09	3.66e-16	4	25	75
activation of blood cells	1	2.08e-13	5.29e-16	0	44	117
colorectal neoplasia	1	1	7.64e-16	0	0	436
vascular disease	0.000329	8.36e-21	8.03e-16	10	63	137
colorectal cancer	1	3.21e-06	8.28e-16	0	112	434
intestinal tumor	1	1	9.31e-16	0	0	437
gastrointestinal tract cancer	1	2.95e-06	1.86e-15	0	117	452
psoriasis	0.00421	1.32e-12	2.07e-15	6	36	92
cell death of tumor cell lines	1	1.07e-07	2.47e-15	0	56	195
morphology of cells	0.00313	4.33e-14	2.53e-15	13	81	233
response of phagocytes	0.00243	1.06e-13	3.74e-15	4	22	48
urological cancer	1	6.69e-08	8.31e-15	0	58	195
activation of leukocytes	1	2.62e-13	9.52e-15	0	42	108
survival of organism	0.00012	2.34e-11	1.4e-14	9	40	107
morphology of body cavity	1	7.69e-11	1.52e-14	0	50	146
organization of cytoskeleton	1	2.29e-08	1.79e-14	0	49	161
cellular homeostasis	1	7.35e-09	1.8e-14	0	56	185
recruitment of cells	1	3.69e-07	1.96e-14	0	20	65
cell death of immune cells	1	7.04e-13	2.08e-14	0	40	103
proliferation of blood cells	1	6.71e-15	2.14e-14	0	49	121
abnormal morphology of lymphoid organ	1	1.22e-05	2.45e-14	0	18	67
advanced malignant tumor	1	1.14e-05	2.47e-14	0	30	115
cell death of blood cells	1	1	2.51e-14	0	0	106
Lymphocyte homeostasis	1	1	2.7e-14	0	0	86
T cell homeostasis	1	8.51e-09	2.94e-14	0	28	83
polyarticular juvenile rheumatoid arthritis	0.015	2.11e-06	3.54e-14	2	9	27
abnormal morphology of body cavity	1	3.85e-11	5.26e-14	0	49	139
phagocytosis of cells	0.00546	1.7e-08	5.29e-14	4	19	54
recruitment of leukocytes	1	1.21e-06	5.39e-14	0	18	60
activation of cells	1	1e-12	5.89e-14	0	51	138
morphology of blood cells	0.026	1.36e-07	6.53e-14	4	24	73
proliferation of immune cells	1	8.58e-15	6.73e-14	0	47	114
morphology of lymphoid organ	1	1	6.82e-14	0	0	68
systemic autoimmune syndrome	1	8.52e-14	7.36e-14	0	53	138
inflammatory response	0.0056	1e-16	7.44e-14	7	49	111
response of myeloid cells	1	1.66e-12	8.01e-14	0	21	45
function of macrophages	1	2.64e-06	8.28e-14	0	13	41
phagocytosis of leukocytes	1	3.26e-11	8.81e-14	0	16	35
phagocytosis of myeloid cells	0.0041	1.44e-10	9.35e-14	3	16	35
recruitment of phagocytes	1	2.54e-07	9.49e-14	0	16	49
occlusion of artery	0.00167	5.31e-17	9.98e-14	7	46	97
differentiation of connective tissue cells	1	2.24e-08	1.13e-13	0	30	91
phagocytosis	1	1	1.21e-13	0	0	57
quantity of T lymphocytes	1	2.21e-08	1.23e-13	0	28	84
cell movement of granulocytes	1	1.64e-09	1.25e-13	0	25	68
cell movement of myeloid cells	0.00468	5.46e-13	1.52e-13	6	37	89
differentiation of blood cells	0.00485	4.49e-12	1.68e-13	7	41	108
immune response of cells	0.00209	1.11e-08	1.69e-13	5	22	62
T cell development	1	7.67e-08	1.77e-13	0	26	80
differentiation of connective tissue	1	4.09e-08	2.03e-13	0	32	99
disorder of artery	0.00112	3.79e-17	2.05e-13	8	50	108
morphology of lymphatic system component	1	1	2.06e-13	0	0	70
organization of cytoplasm	1	1.54e-08	2.1e-13	0	52	167
differentiation of leukocytes	0.0088	1.16e-10	2.27e-13	6	35	96
cell movement of neutrophils	0.0012	1.01e-09	2.43e-13	5	22	57
urogenital cancer	1	3.33e-07	2.5e-13	0	114	418
homing of cells	1	4.52e-10	2.79e-13	0	32	87
adenocarcinoma	0.0281	4.05e-06	2.82e-13	25	145	561
chemotaxis of cells	0.0141	5.38e-09	2.83e-13	5	29	83
immune response of phagocytes	1	7.25e-13	3.16e-13	0	20	42
engulfment of leukocytes	1	1	3.23e-13	0	0	37
Rheumatic Disease	1	3.87e-09	3.77e-13	0	45	139
development of leukocytes	1	7.11e-07	4.12e-13	0	27	89
development of lymphocytes	1	1	4.36e-13	0	0	85
adhesion of blood cells	1	2.82e-13	4.61e-13	0	30	68
function of antigen presenting cells	0.0237	5.25e-08	4.83e-13	3	18	49
morphology of leukocytes	1	1.37e-05	4.92e-13	0	18	62
infection of mammalia	0.000239	1.31e-12	4.94e-13	6	28	61
phagocytosis of phagocytes	1	1.44e-10	5.15e-13	0	15	33
proliferation of tumor cell lines	0.00961	2.45e-08	5.19e-13	10	56	180
homing	1	2.4e-10	5.79e-13	0	33	88
allergy	1	9.46e-07	5.86e-13	0	21	68
engulfment of phagocytes	1	1	6.15e-13	0	0	35
apoptosis of tumor cell lines	1	4.62e-08	6.34e-13	0	48	154
morphology of secondary lymphoid organ	1	1	6.97e-13	0	0	52
chemotaxis	1	3.07e-09	7.17e-13	0	30	84
proliferation of lymphocytes	1	4.02e-13	7.36e-13	0	43	105
cell movement of tumor cell lines	1	4.26e-07	7.37e-13	0	34	111
abnormal morphology of spleen	1	1	8.72e-13	0	0	50
proliferation of mononuclear leukocytes	1	1	8.82e-13	0	0	106
differentiation of mononuclear leukocytes	1	1.49e-09	9.57e-13	0	29	81
head and neck neoplasia	1	1	9.72e-13	0	0	241
pelvic cancer	1	3.88e-07	1.01e-12	0	113	413
arthritis	1	9.32e-08	1.03e-12	0	39	127
proliferation of T lymphocytes	1	4.46e-14	1.13e-12	0	40	91
gastrointestinal carcinoma	1	5.61e-05	1.53e-12	0	101	396
arthropathy	1	5.31e-08	1.69e-12	0	40	128
phagocytosis of antigen presenting cells	1	9.18e-09	1.74e-12	0	12	29
formation of cells	1	1.69e-05	1.75e-12	0	34	125
adhesion of immune cells	0.0167	2.99e-12	1.92e-12	4	27	62
abnormal morphology of abdomen	1	1.76e-07	1.99e-12	0	36	115
morphology of spleen	1	1	2.17e-12	0	0	51
invasion of cells	1	6.49e-06	2.54e-12	0	32	113
cell survival	1	9.16e-09	2.84e-12	0	54	171
activation of mononuclear leukocytes	1	4.9e-09	3.25e-12	0	27	76
metastasis	1	3.66e-06	3.5e-12	0	29	101
cell viability	1	1.98e-08	3.97e-12	0	50	159
angiogenesis	1	2.53e-14	5.04e-12	0	46	106
chronic inflammatory disorder	0.0173	2.81e-10	5.77e-12	7	44	124
necrosis of epithelial tissue	1	2.53e-09	6.48e-12	0	33	91
development of blood cells	1	1	6.5e-12	0	0	93
chemotaxis of neutrophils	1	1	6.97e-12	0	0	36
activation of T lymphocytes	1	1.5e-09	7.28e-12	0	23	60
colorectal carcinoma	1	1	7.32e-12	0	0	372
chemotaxis of granulocytes	1	1	8.01e-12	0	0	40
malignant neoplasm of male genital organ	1	5.57e-07	9.62e-12	0	32	97
apoptosis of blood cells	1	1	1.01e-11	0	0	77
inflammation of organ	1	6.5e-08	1.05e-11	0	45	144
cell movement of phagocytes	0.00489	3.3e-12	1.06e-11	6	36	85
prostatic tumor	1	2.29e-07	1.14e-11	0	32	95
formation of cellular protrusions	1	5.74e-07	1.16e-11	0	33	106
activation of lymphocytes	1	1e-07	1.26e-11	0	24	72
development of cardiovascular system	1	5.54e-15	1.28e-11	0	57	135
immediate hypersensitivity	1	1.67e-05	1.32e-11	0	16	55
apoptosis of leukocytes	1	5.82e-10	1.33e-11	0	28	73
transactivation of RNA	1	2.34e-05	1.33e-11	0	23	82
degranulation of cells	0.000241	4.58e-11	1.39e-11	5	20	43
proliferation of neuronal cells	1	9.44e-07	1.42e-11	0	28	87
transactivation	1	2.55e-05	1.42e-11	0	24	86
chemotaxis of myeloid cells	1	2.21e-05	1.5e-11	0	15	52
juvenile rheumatoid arthritis	1	1	1.53e-11	0	0	29
phagocytosis by macrophages	0.0264	4.88e-08	1.59e-11	2	12	28
Prostate Cancer and Tumors	1	1	1.72e-11	0	0	93
neoplasia of colon	1	1	1.84e-11	0	0	372
Dermatitis	1	3.5e-05	1.86e-11	0	18	67
immune response of antigen presenting cells	1	1.53e-08	1.93e-11	0	15	37
differentiation of lymphocytes	1	4.73e-08	1.97e-11	0	26	74
response of antigen presenting cells	1	1	2.1e-11	0	0	39
infiltration of cells	1	1	2.19e-11	0	0	68
homing of leukocytes	1	8.62e-08	2.49e-11	0	22	62
colon tumor	1	1	2.65e-11	0	0	372
quantity of protein in blood	0.0112	2.22e-08	3.01e-11	5	28	75
recruitment of myeloid cells	1	8.92e-06	3.09e-11	0	13	42
prostate cancer	1	3.01e-07	3.54e-11	0	31	91
growth of tumor	1	1.69e-07	3.98e-11	0	34	104
colon cancer	1	1	4.64e-11	0	0	369
quantity of cytokine	0.000401	7.15e-08	4.89e-11	5	18	46
vasculogenesis	0.00181	1.06e-12	5.34e-11	8	45	108
accumulation of leukocytes	1	5.34e-12	5.86e-11	0	22	46
chemotaxis of phagocytes	1	2.37e-05	5.92e-11	0	15	51
development of blood vessel	1	2.78e-14	6.2e-11	0	50	115
recruitment of antigen presenting cells	1	3.96e-05	6.81e-11	0	8	27
microtubule dynamics	1	5.66e-07	8.39e-11	0	41	132
Bacterial Infection	0.00472	2.22e-10	9.15e-11	5	27	64
chemotaxis of leukocytes	1	7e-06	9.49e-11	0	18	58
cell death of epithelial cells	1	7.93e-07	1.32e-10	0	25	76
function of lymphocytes	1	9.83e-07	1.54e-10	0	19	56
differentiation of T lymphocytes	1	3.14e-08	1.62e-10	0	22	58
colon carcinoma	1	1	1.62e-10	0	0	350
abnormal morphology of leukocytes	1	4.55e-05	1.63e-10	0	13	42
organismal death	1	5.34e-09	1.7e-10	0	81	257
quantity of hematopoietic cells	1	1	1.83e-10	0	0	65
recruitment of macrophages	1	7.22e-05	1.84e-10	0	7	24
mammary tumor	1	5.17e-06	2.01e-10	0	51	174
engulfment of cells	0.000745	8.04e-08	2.09e-10	6	23	63
migration of tumor cell lines	1	7.16e-08	2.26e-10	0	31	88
viral respiratory infection	1	1	2.43e-10	0	0	27
infiltration of leukocytes	0.00076	8.76e-12	2.45e-10	6	29	63
response of macrophages	1	1	2.78e-10	0	0	33
recruitment of granulocytes	1	2.38e-05	2.93e-10	0	12	39
quantity of neutrophils	1	8.18e-06	3.14e-10	0	14	41
cell spreading	1	1	3.24e-10	0	0	47
gastrointestinal adenocarcinoma	1	1	3.43e-10	0	0	364
neurological signs	1	1	3.46e-10	0	0	92
accumulation of myeloid cells	1	8.18e-09	3.55e-10	0	15	34
quantity of hematopoietic progenitor cells	1	3.68e-05	4.06e-10	0	18	64
development of lymphatic system	1	1	4.3e-10	0	0	53
breast or ovarian cancer	1	1.13e-05	4.66e-10	0	53	184
inflammation of body region	1	2e-08	4.73e-10	0	40	117
apoptosis of phagocytes	0.0148	1.84e-05	5.02e-10	3	12	38
abnormality of immune system	1	5.76e-05	5.05e-10	0	9	30
growth of neurites	1	6.18e-06	5.18e-10	0	23	71
infection of respiratory tract	1	8.83e-07	5.28e-10	0	12	30
quantity of macrophages	1	7.37e-06	5.36e-10	0	13	37
degranulation of phagocytes	0.00597	6.64e-08	5.51e-10	3	13	31
Viral Infection	0.0174	1.26e-10	5.83e-10	10	65	183
severe acute respiratory syndrome	0.0268	3.75e-06	5.84e-10	2	10	26
immune response of macrophages	0.00515	3.4e-08	5.91e-10	3	14	31
genital tumor	1	1.18e-06	6.15e-10	0	103	365
liver tumor	1	1	6.32e-10	0	0	418
apoptosis of myeloid cells	0.0137	6.32e-05	7.6e-10	3	11	37
liver cancer	1	1	7.6e-10	0	0	415
quantity of myeloid cells	1	2.09e-07	9.49e-10	0	20	54
endocrine gland tumor	1	1	1e-09	0	0	170
response of neutrophils	1	4.4e-10	1.08e-09	0	12	22
quantity of B lymphocytes	1	8.67e-05	1.09e-09	0	16	53
differentiation of bone cells	1	1.78e-05	1.31e-09	0	18	58
response of granulocytes	1	3.36e-10	1.4e-09	0	13	24
quantity of antigen presenting cells	1	9.66e-07	1.58e-09	0	17	45
quantity of granulocytes	1	5.18e-07	1.73e-09	0	18	49
arteriosclerosis	1	1	2.17e-09	0	0	69
response of mononuclear leukocytes	0.00278	1.38e-11	2.2e-09	4	20	39
cell death of phagocytes	1	3.79e-06	2.45e-09	0	14	40
accumulation of granulocytes	1	3.48e-06	2.46e-09	0	9	24
Breast Cancer and Tumors	1	1	2.51e-09	0	0	160
outgrowth of cells	1	6.95e-06	2.73e-09	0	22	66
binding of cells	1	2.07e-10	2.87e-09	0	31	71
rheumatoid arthritis	1	9.58e-07	2.91e-09	0	29	89
atherosclerosis	1	3.38e-10	3.02e-09	0	30	68
dyskinesia	1	1	3.15e-09	0	0	86
breast cancer	1	6.49e-06	3.17e-09	0	48	159
quantity of TNF in blood	0.000629	7.42e-08	3.2e-09	3	10	20
activation of phagocytes	1	9.33e-10	3.71e-09	0	25	57
neuromuscular disease	1	3.65e-05	3.94e-09	0	33	111
recruitment of neutrophils	0.00985	1.93e-05	4.5e-09	3	11	33
development of connective tissue cells	1	1	4.59e-09	0	0	38
antimicrobial response	1	1	4.59e-09	0	0	39
migration of myeloid cells	1	1.19e-06	4.68e-09	0	12	31
organization of actin cytoskeleton	1	1	4.83e-09	0	0	44
morphology of connective tissue	1	2.05e-07	5.1e-09	0	25	66
immune response of neutrophils	1	1.72e-09	5.15e-09	0	11	20
hematological neoplasia	1	1	5.71e-09	0	0	141
activation of myeloid cells	1	5.54e-09	5.85e-09	0	23	54
head and neck cancer	1	1	5.92e-09	0	0	92
hematologic cancer	1	6.65e-07	6.7e-09	0	45	140
internalization of cells	1	1	7.02e-09	0	0	26
adhesion of granulocytes	1	1	7.05e-09	0	0	23
disorder of basal ganglia	1	1	7.78e-09	0	0	100
Movement Disorders	1	1	8.25e-09	0	0	129
colorectal adenocarcinoma	1	1	9e-09	0	0	317
blood tumor	1	1	9.76e-09	0	0	141
function of helper T lymphocytes	1	1.14e-08	1.01e-08	0	10	19
metastatic gastrointestinal tract cancer	1	1	1.04e-08	0	0	35
concentration of D-glucose	1	1.55e-05	1.05e-08	0	18	52
migration of phagocytes	1	3.64e-09	1.08e-08	0	20	44
metastatic colorectal cancer	1	1	1.12e-08	0	0	32
morphology of macrophages	1	1	1.19e-08	0	0	21
fatty acid metabolism	1	1	1.22e-08	0	0	79
renal cancer	1	1	1.24e-08	0	0	97
Huntington's Disease	1	1	1.27e-08	0	0	80
binding of neutrophils	1	1	1.32e-08	0	0	14
outgrowth of neurites	1	7.49e-06	1.33e-08	0	21	61
abnormal morphology of cells	1	1.82e-08	1.34e-08	0	51	144
abnormal morphology of enlarged spleen	1	1	1.36e-08	0	0	31
abnormal quantity of cytokine	0.0268	1	1.42e-08	2	0	24
melanoma	1	1	1.51e-08	0	0	531
hyperplasia	1	4.06e-05	1.54e-08	0	21	71
adhesion of tumor cell lines	0.00586	5.78e-07	1.55e-08	4	17	44
migration of neutrophils	0.0236	1	1.68e-08	2	0	22
function of T lymphocytes	1	4.78e-06	1.74e-08	0	15	42
injury of mice	1	1	1.78e-08	0	0	21
sepsis	0.00655	4.24e-06	2.05e-08	3	11	29
development of body trunk	0.0216	1.2e-09	2.16e-08	7	46	118
cell death of myeloid cells	1	1.67e-05	2.22e-08	0	13	38
morphology of myeloid cells	1	1	2.33e-08	0	0	28
cell viability of blood cells	1	1	2.37e-08	0	0	42
inflammation of central nervous system	1	7.54e-05	2.46e-08	0	15	46
migration of mononuclear leukocytes	0.0172	1.08e-10	2.49e-08	4	25	53
Wound	1	1	2.52e-08	0	0	37
atopic dermatitis	1	1	2.65e-08	0	0	41
function of granulocytes	1	1	2.84e-08	0	0	22
morphology of phagocytes	1	1	3.01e-08	0	0	27
expression of RNA	1	2.26e-09	3.12e-08	0	71	204
cell viability of tumor cell lines	1	8.66e-05	3.24e-08	0	27	92
damage of mice	1	1	3.34e-08	0	0	22
Renal Cancer and Tumors	1	1	3.49e-08	0	0	98
growth of epithelial tissue	1	4.86e-09	3.53e-08	0	34	85
cell spreading of phagocytes	1	1	3.71e-08	0	0	11
invasion of prostate cancer cell lines	1	4.43e-05	3.85e-08	0	7	20
chronic psoriasis	0.00441	1	4.59e-08	3	0	27
cell viability of leukocytes	1	1	5.11e-08	0	0	38
development of connective tissue	1	2.18e-06	5.2e-08	0	19	52
function of neutrophils	0.0163	1	5.23e-08	2	0	19
accumulation of phagocytes	1	1.01e-06	5.27e-08	0	11	26
function of immune system	1	6.45e-10	5.56e-08	0	12	20
neck neoplasm	1	1	5.66e-08	0	0	147
accumulation of cells	1	1	5.81e-08	0	0	50
adhesion of endothelial cells	1	1	6.01e-08	0	0	27
benign neoplasia	1	7.41e-07	6.13e-08	0	31	86
proliferation of tumor cells	1	3.33e-05	6.51e-08	0	21	66
cell movement of mononuclear leukocytes	1	3e-10	7.3e-08	0	28	62
growth of malignant tumor	1	1	7.39e-08	0	0	62
accumulation of neutrophils	1	1	7.41e-08	0	0	17
Encephalitis	1	1	7.94e-08	0	0	44
production of reactive oxygen species	1	1	7.95e-08	0	0	59
quantity of carbohydrate	1	2.22e-08	8.16e-08	0	29	71
quantity of IL-6 in blood	0.0143	1.74e-06	8.54e-08	2	9	19
apoptosis of leukemia cell lines	1	1	8.63e-08	0	0	44
delayed hypersensitive reaction	1	3.18e-07	8.81e-08	0	12	25
quantity of interleukin	0.00402	6.67e-07	9.03e-08	3	12	26
healing of wound	1	1	9.12e-08	0	0	30
endometriosis	0.0196	6.43e-06	9.58e-08	4	19	54
phagocytosis of granulocytes	0.00608	3.41e-08	1.01e-07	2	9	15
migration of granulocytes	1	8.97e-06	1.03e-07	0	10	26
invasion of tumor cell lines	1	1	1.06e-07	0	0	76
metabolism of reactive oxygen species	1	1	1.07e-07	0	0	75
development of neurons	1	1	1.12e-07	0	0	83
cell movement of monocytes	0.00805	2.56e-07	1.15e-07	3	13	29
lymphoid cancer	1	6.21e-05	1.16e-07	0	35	118
synthesis of reactive oxygen species	1	1	1.17e-07	0	0	73
morphology of antigen presenting cells	1	1	1.22e-07	0	0	23
epileptic seizure	1	3.42e-11	1.23e-07	0	18	29
arrest in G0/G1 phase transition	1	1	1.44e-07	0	0	16
morbidity or mortality	0.000337	6.99e-09	1.57e-07	5	19	38
colon adenocarcinoma	1	1	1.58e-07	0	0	294
thyroid gland tumor	1	1	1.63e-07	0	0	144
inflammation of large intestine	0.0254	1	1.77e-07	3	0	38
infiltration of granulocytes	0.00237	1.99e-09	1.9e-07	4	18	35
damage of lung	0.00738	2.51e-08	1.97e-07	3	14	28
apoptosis of epithelial cells	1	3.18e-05	2.06e-07	0	15	44
quantity of thymocytes	1	1	2.09e-07	0	0	35
hormone receptor negative breast cancer	1	1	2.1e-07	0	0	27
binding of DNA	1	1	2.16e-07	0	0	72
proliferation of liver cells	1	1	2.33e-07	0	0	32
inflammation of intestine	1	3.95e-05	2.53e-07	0	14	41
formation of connective tissue cells	1	1	2.73e-07	0	0	33
differentiation of tumor cell lines	1	4.88e-06	2.95e-07	0	20	53
Lesion Formation	1	1.37e-10	3.06e-07	0	29	58
transcription of RNA	1	1.34e-08	3.13e-07	0	63	178
concentration of lipid	1	3.01e-07	3.15e-07	0	37	101
respiratory burst of neutrophils	1	1	3.31e-07	0	0	11
progesterone receptor-negative breast cancer	1	1	3.35e-07	0	0	25
G1 phase	1	1	3.36e-07	0	0	53
respiratory burst of granulocytes	1	1	3.44e-07	0	0	12
renal-cell carcinoma	1	1	3.44e-07	0	0	85
quantity of cytotoxic T cells	1	2.85e-05	3.45e-07	0	10	25
development of lymphatic system component	1	1	3.48e-07	0	0	40
cell death of leukemia cell lines	1	1	3.51e-07	0	0	47
phosphorylation of L-amino acid	1	1	3.51e-07	0	0	32
quantity of double-negative T lymphocyte	1	1	3.55e-07	0	0	16
proliferation of fibroblast cell lines	1	1	3.73e-07	0	0	57
quantity of immunoglobulin	1	6.29e-07	3.77e-07	0	17	41
cell death of lymphocytes	1	3.49e-06	4.06e-07	0	20	54
formation of lymphoid organ	1	1	4.08e-07	0	0	36
proliferation of cancer cells	1	1	4.09e-07	0	0	52
formation of lymphatic system component	1	1	4.17e-07	0	0	39
proliferation of breast cancer cell lines	1	8.08e-05	4.22e-07	0	19	56
cell cycle progression	1	3.06e-06	4.23e-07	0	38	113
aggregation of cells	1	5.47e-05	4.24e-07	0	17	49
innate immune response	1	1	4.24e-07	0	0	28
transcription	1	1.13e-08	4.47e-07	0	64	180
sarcoma	1	1	4.65e-07	0	0	53
response of lymphocytes	1	5.53e-08	4.74e-07	0	14	30
proliferation of muscle cells	1	6.62e-08	4.97e-07	0	22	50
Fibrosis	1	8.15e-07	4.97e-07	0	26	67
cell spreading of blood cells	1	1	4.99e-07	0	0	16
differentiation of adipocytes	1	1	5.33e-07	0	0	34
cell-mediated response	0.00973	1.43e-08	5.42e-07	3	14	28
cell death of mononuclear leukocytes	1	1	5.46e-07	0	0	55
abnormal morphology of thoracic cavity	1	6.66e-08	5.67e-07	0	30	73
response of tumor cell lines	1	1	6.17e-07	0	0	26
adhesion of phagocytes	1	1	6.17e-07	0	0	24
binding of granulocytes	1	1	6.66e-07	0	0	15
hyperplasia of skin	1	1	6.74e-07	0	0	23
gonadal tumor	1	1	6.93e-07	0	0	69
formation of muscle	1	1	7.3e-07	0	0	52
production of antibody	1	1	7.32e-07	0	0	42
degranulation of mast cells	1	5e-07	7.66e-07	0	12	24
degranulation of neutrophils	1	1	7.82e-07	0	0	10
phagocytosis of tumor cell lines	1	1	8.15e-07	0	0	16
size of body	1	1	8.62e-07	0	0	97
transport of molecule	1	5.95e-05	8.65e-07	0	48	160
Lymphocyte migration	1	5.34e-08	8.82e-07	0	20	46
cell transformation	1	1	8.9e-07	0	0	59
clearance of cells	0.0156	1	8.96e-07	2	0	18
differentiation of osteoclasts	1	1	9.06e-07	0	0	29
morphology of tumor cell lines	0.00155	1	9.35e-07	4	0	32
triple-negative breast cancer	1	1	9.37e-07	0	0	24
proliferation of smooth muscle cells	1	4.45e-06	9.46e-07	0	16	40
expression of DNA	1	4.9e-06	9.9e-07	0	48	147
function of Th2 cells	1	2.04e-07	1.02e-06	0	7	12
binding of professional phagocytic cells	0.00319	2.04e-06	1.02e-06	3	10	22
adhesion of vascular endothelial cells	1	1	1.03e-06	0	0	18
growth of organism	1	1.93e-05	1.04e-06	0	32	96
experimental autoimmune encephalomyelitis	1	3.47e-05	1.04e-06	0	14	37
proliferation of hematopoietic progenitor cells	1	1	1.04e-06	0	0	35
quantity of helper T lymphocytes	1	1.61e-06	1.07e-06	0	14	31
quantity of Single positive thymocytes	1	1	1.07e-06	0	0	15
invasion of tissue	1	1	1.07e-06	0	0	30
glucose metabolism disorder	1	3.95e-08	1.1e-06	0	49	133
response of leukemia cell lines	1	1	1.11e-06	0	0	12
cell movement of lymphocytes	1	4.31e-08	1.19e-06	0	22	51
infiltration by neutrophils	0.00805	6.83e-10	1.27e-06	3	16	27
mobilization of Ca2+	0.018	5.37e-05	1.29e-06	4	17	50
proliferation of hematopoietic cell lines	1	1	1.31e-06	0	0	33
dysgenesis	1	3.15e-06	1.4e-06	0	25	65
proliferation of hematopoietic cells	1	1	1.44e-06	0	0	36
synthesis of nitric oxide	0.00201	4.35e-08	1.49e-06	5	22	46
ovarian neoplasia	1	1	1.52e-06	0	0	62
concentration of fatty acid	1	5.09e-05	1.54e-06	0	15	42
HER2-negative breast cancer	1	1	1.56e-06	0	0	27
immune response of tumor cell lines	1	1	1.61e-06	0	0	24
cell death of dermal cells	1	1	1.64e-06	0	0	19
respiratory burst of phagocytes	1	4.94e-05	1.67e-06	0	5	12
phosphorylation of protein	1	3.68e-07	1.7e-06	0	30	78
ulcerative colitis	1	1	1.73e-06	0	0	19
quantity of lymphatic system cells	1	6.28e-06	1.75e-06	0	15	38
peripheral arterial occlusive disease	0.00173	3.2e-09	1.78e-06	4	18	32
adhesion of neutrophils	1	1	1.79e-06	0	0	16
cell-cell adhesion	1	1	1.8e-06	0	0	29
adhesion of eosinophils	1	1	1.83e-06	0	0	10
metastatic carcinoma	1	1	1.93e-06	0	0	25
shape change of blood cells	1	1.79e-05	2e-06	0	8	19
colitis	1	1	2.01e-06	0	0	35
phagocytosis of neutrophils	1	3.29e-07	2.12e-06	0	8	13
phagocytosis of bacteria	0.00545	5.53e-05	2.12e-06	2	6	13
cell spreading of leukocytes	1	1	2.12e-06	0	0	13
activation of enzyme	1	1	2.17e-06	0	0	49
growth of connective tissue	1	2.81e-06	2.25e-06	0	27	74
development of lymphatic system cells	1	1	2.31e-06	0	0	21
vascular lesion	1	2.71e-09	2.39e-06	0	19	34
quantity of metal	1	2.4e-07	2.43e-06	0	28	69
binding of tumor cell lines	1	4.65e-07	2.48e-06	0	15	30
maturation of cells	1	2.36e-06	2.57e-06	0	22	57
adipogenesis of fat	1	1	2.63e-06	0	0	8
malignant neoplasm of endocrine gland	1	1	2.63e-06	0	0	37
abnormal morphology of lymphocytes	1	1	2.64e-06	0	0	27
degranulation of granulocytes	1	1	2.68e-06	0	0	12
differentiation of osteoblasts	1	1	2.7e-06	0	0	37
morphology of cardiovascular system	1	4.82e-07	2.73e-06	0	31	79
respiratory burst	1	4.77e-06	2.8e-06	0	8	17
lymphocytic cancer	1	1	2.8e-06	0	0	65
interphase	1	1	2.86e-06	0	0	77
injury of lung	1	1.08e-06	2.88e-06	0	11	23
attachment of cells	1	1	2.88e-06	0	0	24
response of monocytes	0.00128	6.45e-07	2.91e-06	2	6	9
cell rolling of blood cells	1	1	2.96e-06	0	0	16
abnormal morphology of macrophages	0.0122	1	3.02e-06	2	0	16
morphology of nervous system	1	1	3.05e-06	0	0	90
binding of leukocytes	1	2.82e-07	3.15e-06	0	14	29
differentiation of muscle	1	3.44e-05	3.18e-06	0	15	39
function of Th1 cells	1	2.71e-05	3.22e-06	0	6	12
adipogenesis	1	1	3.22e-06	0	0	24
tyrosine phosphorylation	1	1	3.25e-06	0	0	31
T cell response	1	7.28e-07	3.28e-06	0	11	24
formation of osteoclasts	1	1	3.28e-06	0	0	21
seizures	1	1.06e-05	3.31e-06	0	20	52
immune response of T lymphocytes	1	4.49e-05	3.41e-06	0	8	20
cell tethering or rolling	1	1	3.95e-06	0	0	18
Hypoplasia	1	2.81e-06	3.99e-06	0	24	61
transmigration of cells	1	2.65e-06	4.06e-06	0	11	24
shape change of leukocytes	1	2.22e-05	4.09e-06	0	7	16
development of genitourinary system	1	1	4.12e-06	0	0	94
synthesis of lipid	1	1.86e-05	4.15e-06	0	30	86
development of hematopoietic system	1	1	4.16e-06	0	0	35
non-Hodgkin's disease	1	1	4.26e-06	0	0	55
neuritogenesis	1	1	4.4e-06	0	0	60
Cytosis	1	1	4.41e-06	0	0	39
size of bone	0.0235	6.32e-06	4.5e-06	3	15	35
mass of connective tissue	1	1	4.52e-06	0	0	29
development of endothelial tissue	1	1	4.57e-06	0	0	47
gastroenteritis	0.029	1	4.58e-06	3	0	36
quantity of IgG	1	1	4.64e-06	0	0	31
obesity	1	1.48e-06	4.74e-06	0	22	54
degranulation of leukocyte cell lines	0.00815	1.88e-05	4.8e-06	2	7	14
development of epithelial tissue	1	1.88e-08	4.87e-06	0	27	60
binding of blood cells	0.00285	2.76e-08	4.95e-06	4	17	33
uptake of carbohydrate	0.0106	8.67e-05	5.09e-06	4	15	43
tubulogenesis	1	8.44e-05	5.19e-06	0	5	12
mitochondrial respiratory chain deficiency	1	1	5.19e-06	0	0	13
branching of cells	1	1	5.24e-06	0	0	47
invasion of tumor	0.0239	6.86e-06	5.25e-06	3	15	35
proliferation of B lymphocytes	1	6.65e-05	5.33e-06	0	15	40
T cell migration	1	1.07e-07	5.5e-06	0	16	34
cell death of keratinocytes	1	1	5.58e-06	0	0	17
proliferation of thymocytes	1	1	5.58e-06	0	0	17
cell surface receptor linked signal transduction	1	1	5.66e-06	0	0	35
oxidation of lipid	1	1	5.66e-06	0	0	33
cytopenia	1	1	5.66e-06	0	0	35
mass of adipose tissue	1	6.69e-06	5.75e-06	0	13	28
Infarction	1	1	5.8e-06	0	0	43
transcription of DNA	1	6.3e-05	5.98e-06	0	43	137
formation of granuloma	1	1	6.06e-06	0	0	9
adipogenesis of lipid	1	1	6.06e-06	0	0	9
concentration of cholesterol	1	1	6.19e-06	0	0	41
development of cardiovascular tissue	1	4.79e-07	6.26e-06	0	22	52
development of body axis	1	1	6.31e-06	0	0	99
inflammatory response of cells	1	1	6.4e-06	0	0	13
cell movement of macrophages	0.00529	4.56e-10	1	4	21	0
mid stage peripheral arterial occlusive disease	0.00597	1.08e-09	1	3	16	0
cell movement of antigen presenting cells	1	1.09e-09	1	0	24	0
atherosclerotic lesion	1	1.78e-09	1	0	16	0
homing of endothelial cells	1	1.98e-09	1	0	9	0
metabolism of carbohydrate	1	4e-09	1	0	33	0
formation of vascular lesion	0.00242	1.01e-08	1	3	13	0
synthesis of carbohydrate	1	1.6e-08	1	0	26	0
chemotaxis of endothelial cells	0.00565	2.43e-08	1	2	8	0
diabetes mellitus	1	4.89e-08	1	0	43	0
cell movement of endothelial cells	1	5.79e-08	1	0	21	0
insulin-dependent diabetes mellitus	1	7.08e-08	1	0	24	0
endothelial cell development	1	8.3e-08	1	0	21	0
volume of trabecular bone	0.0125	8.39e-08	1	2	10	0
abnormal morphology of bile duct	1	8.41e-08	1	0	5	0
atherogenesis	0.0137	1.34e-07	1	2	10	0
cell movement of peripheral blood leukocytes	1	1.53e-07	1	0	8	0
proliferation of endothelial cells	1	1.59e-07	1	0	19	0
epilepsy	1	2.06e-07	1	0	19	0
inflammation of body cavity	0.0171	2.09e-07	1	5	27	0
function of mononuclear leukocytes	1	2.54e-07	1	0	20	0
cell movement of muscle cells	1	2.99e-07	1	0	14	0
activation of antigen presenting cells	1	3.05e-07	1	0	19	0
Edema	1	3.18e-07	1	0	20	0
activation of macrophages	1	3.24e-07	1	0	16	0
cell movement of T lymphocytes	0.0189	4.5e-07	1	3	15	0
leiomyomatosis	1	5.31e-07	1	0	18	0
vascularization	1	6.05e-07	1	0	16	0
abnormal morphology of cardiovascular system	1	6.68e-07	1	0	29	0
circulation of blood	0.0119	7.54e-07	1	2	9	0
neovascularization	1	8.25e-07	1	0	13	0
infiltration of phagocytes	1	8.89e-07	1	0	14	0
quantity of metal ion	1	9.88e-07	1	0	25	0
toxemia	1	1.01e-06	1	0	10	0
hypoplasia of organ	1	1.03e-06	1	0	23	0
concentration of phosphatidic acid	1	1.08e-06	1	0	11	0
infiltration of macrophages	0.00749	1.19e-06	1	3	13	0
blood pressure	1	1.41e-06	1	0	19	0
Thrombosis	1	1.5e-06	1	0	13	0
volume of bone	1	1.65e-06	1	0	11	0
transmigration of leukocytes	1	1.65e-06	1	0	10	0
fibrosis of heart	1	1.69e-06	1	0	13	0
recruitment of monocytes	1	1.69e-06	1	0	6	0
maturation of blood cells	1	1.74e-06	1	0	16	0
benign pelvic disease	1	1.87e-06	1	0	20	0
intestinal cancer	1	1.9e-06	1	0	113	0
migration of antigen presenting cells	1	2e-06	1	0	12	0
bone mineral density	0.00862	2.12e-06	1	3	13	0
Inflammatory Bowel Disease	0.00383	2.37e-06	1	4	14	0
cell movement of smooth muscle cells	1	2.79e-06	1	0	12	0
movement of vascular endothelial cells	1	2.94e-06	1	0	12	0
infection of leukocytes	1	3.38e-06	1	0	8	0
mobilization of myeloid cells	1	3.7e-06	1	0	5	0
infection of mononuclear leukocytes	1	3.7e-06	1	0	6	0
homing of lymphocytes	1	4.49e-06	1	0	11	0
migration of smooth muscle cells	1	5.62e-06	1	0	11	0
inflammation of respiratory system	1	5.69e-06	1	0	19	0
homing of mononuclear leukocytes	1	5.72e-06	1	0	13	0
endotoxemia	0.00125	6.13e-06	1	3	9	0
coronary artery disease	1	6.53e-06	1	0	16	0
cell death of T lymphocytes	1	6.73e-06	1	0	18	0
adhesion of monocytes	1	6.77e-06	1	0	5	0
inflammation of liver	1	7.04e-06	1	0	15	0
mortality	1	7.07e-06	1	0	11	0
morphology of vessel	1	7.14e-06	1	0	17	0
chemotaxis of vascular endothelial cells	1	7.74e-06	1	0	4	0
accumulation of macrophages	1	8.44e-06	1	0	8	0
morphology of digestive system	1	8.67e-06	1	0	25	0
coronary disease	1	8.82e-06	1	0	17	0
cell death of endothelial cells	1	8.92e-06	1	0	13	0
metastasis of tumor cell lines	1	8.97e-06	1	0	10	0
proliferation of vascular endothelial cells	1	8.97e-06	1	0	10	0
quantity of Ca2+	1	9.12e-06	1	0	22	0
chemoattraction of granulocytes	1	9.78e-06	1	0	4	0
metastasis of cells	1	1.03e-05	1	0	12	0
formation of lung	1	1.1e-05	1	0	16	0
attraction of neutrophils	1	1.22e-05	1	0	4	0
mitogenesis	0.0091	1.44e-05	1	3	12	0
abnormal morphology of heart	1	1.45e-05	1	0	19	0
respiratory system development	1	1.47e-05	1	0	17	0
metabolism of polysaccharide	1	1.54e-05	1	0	14	0
colony formation	1	1.57e-05	1	0	23	0
chemotaxis of eosinophils	1	1.59e-05	1	0	5	0
cell movement of PBMCs	1	1.59e-05	1	0	5	0
proliferation of CD4+ T-lymphocytes	1	1.59e-05	1	0	6	0
quantity of connective tissue cells	1	1.6e-05	1	0	14	0
hepatic steatosis	0.00434	1.63e-05	1	4	15	0
ruffling	1	1.66e-05	1	0	9	0
abnormal morphology of lung	1	1.67e-05	1	0	12	0
inflammation of respiratory system component	1	1.68e-05	1	0	18	0
cell death of tumor cells	1	1.73e-05	1	0	18	0
size of cells	1	1.78e-05	1	0	19	0
flux of Ca2+	1	1.78e-05	1	0	16	0
hydrolysis of phosphatidic acid	1	1.78e-05	1	0	9	0
attraction of myeloid cells	1	1.83e-05	1	0	5	0
mobilization of granulocytes	1	1.85e-05	1	0	4	0
adhesion of mononuclear leukocytes	1	1.86e-05	1	0	9	0
thermoregulation	0.00101	2.02e-05	1	4	11	0
mobilization of cells	1	2.04e-05	1	0	7	0
removal of lipid	1	2.09e-05	1	0	6	0
hypoplasia of thorax	1	2.12e-05	1	0	12	0
formation of vessel	1	2.13e-05	1	0	10	0
formation of blood vessel	1	2.2e-05	1	0	9	0
interstitial fibrosis of heart	1	2.25e-05	1	0	5	0
ion homeostasis of cells	1	2.34e-05	1	0	24	0
cleavage of carbohydrate	1	2.54e-05	1	0	10	0
differentiation of helper T lymphocytes	1	2.55e-05	1	0	11	0
Bleeding	1	2.56e-05	1	0	20	0
lymphoproliferative disorder	1	2.61e-05	1	0	28	0
reperfusion injury	1	2.61e-05	1	0	8	0
antiviral response	1	2.69e-05	1	0	10	0
cell movement of peripheral blood monocytes	1	2.71e-05	1	0	5	0
respiratory burst of cells	0.00916	2.8e-05	1	2	6	0
synthesis of polysaccharide	1	2.8e-05	1	0	12	0
cell movement of lymphatic system cells	1	2.82e-05	1	0	7	0
damage of liver	1	2.9e-05	1	0	14	0
abnormal morphology of digestive system	1	2.97e-05	1	0	23	0
flux of ion	1	2.99e-05	1	0	17	0
uptake of lipid	1	3.2e-05	1	0	12	0
seizure disorder	1	3.2e-05	1	0	21	0
migration of cancer cells	1	3.2e-05	1	0	11	0
release of metal	1	3.22e-05	1	0	13	0
rejection of tumor	1	3.36e-05	1	0	3	0
function of connective tissue cells	1	3.49e-05	1	0	9	0
proliferation of connective tissue cells	1	3.5e-05	1	0	24	0
disorder of vein	1	3.55e-05	1	0	8	0
migration of macrophages	1	3.55e-05	1	0	7	0
maturation of leukocytes	1	3.6e-05	1	0	13	0
recruitment of mononuclear leukocytes	0.0289	3.72e-05	1	2	8	0
binding of monocytes	1	3.85e-05	1	0	4	0
formation of connective tissue	1	3.85e-05	1	0	5	0
cell movement of prostate cancer cell lines	1	3.96e-05	1	0	8	0
mobilization of myeloid progenitor cells	1	4.18e-05	1	0	2	0
infection by rotavirus	1	4.18e-05	1	0	2	0
fibrogenesis	1	4.29e-05	1	0	18	0
migration of tumor cells	1	4.37e-05	1	0	12	0
mobilization of neutrophils	1	4.44e-05	1	0	3	0
apoptosis of granulocytes	1	4.76e-05	1	0	7	0
migration of monocytes	1	4.76e-05	1	0	8	0
binding of mononuclear leukocytes	1	4.77e-05	1	0	8	0
uterine leiomyoma	1	4.81e-05	1	0	14	0
differentiation of muscle cells	1	4.81e-05	1	0	14	0
mobilization of blood cells	0.0108	4.87e-05	1	2	6	0
attraction of phagocytes	1	4.94e-05	1	0	5	0
cell movement of bone marrow cells	1	4.94e-05	1	0	6	0
granulomatous disease	1	5.12e-05	1	0	7	0
proliferation of bone marrow cells	1	5.19e-05	1	0	9	0
rearrangement of cytoskeleton	1	5.31e-05	1	0	7	0
activation of vascular endothelial cells	4.23e-05	5.32e-05	1	3	5	0
infection of myeloid cells	1	5.32e-05	1	0	5	0
cell movement of hepatic stellate cells	1	5.32e-05	1	0	5	0
expansion of leukocytes	1	5.36e-05	1	0	11	0
systemic lupus erythematosus	1	5.76e-05	1	0	10	0
cell movement of cancer cells	1	5.76e-05	1	0	9	0
polarization of cells	1	5.78e-05	1	0	10	0
extravasation of cells	1	5.79e-05	1	0	7	0
transmigration of mononuclear leukocytes	1	5.79e-05	1	0	6	0
formation of cytoskeleton	1	5.79e-05	1	0	16	0
amyloidosis	1	6e-05	1	0	23	0
homing of T lymphocytes	1	6.05e-05	1	0	8	0
advanced stage peripheral arterial occlusive disease	0.00515	6.06e-05	1	3	10	0
progressive motor neuropathy	1	6.43e-05	1	0	22	0
apoptosis of T lymphocytes	1	6.65e-05	1	0	15	0
migration of endothelial cells	1	6.67e-05	1	0	15	0
lymphoproliferative malignancy	1	6.71e-05	1	0	21	0
arrest in cell cycle progression	1	7.08e-05	1	0	15	0
quantity of IgG2a	0.0213	7.22e-05	1	2	7	0
accumulation of T lymphocytes	1	7.22e-05	1	0	7	0
attraction of effector lymphocytes	1	7.24e-05	1	0	2	0
infection by hepatitis B virus	1	7.24e-05	1	0	2	0
cell movement of monocyte-derived macrophages	0.000658	7.31e-05	1	2	4	0
chemoattraction of neutrophils	1	7.31e-05	1	0	3	0
proliferation of natural killer T lymphocytes	1	7.31e-05	1	0	3	0
chemotaxis of antigen presenting cells	1	7.41e-05	1	0	10	0
accumulation of lymphocytes	1	7.62e-05	1	0	8	0
hypothermia	1	7.62e-05	1	0	6	0
failure of liver	1	7.62e-05	1	0	6	0
release of Ca2+	1	7.68e-05	1	0	12	0
chemotaxis of T lymphocytes	0.0216	7.72e-05	1	2	7	0
neoplasia of tumor cell lines	1	7.78e-05	1	0	13	0
size of lesion	1	7.78e-05	1	0	14	0
function of muscle	1	8.06e-05	1	0	9	0
apoptosis of lymphocytes	1	8.3e-05	1	0	16	0
angiogenesis of cornea	1	8.31e-05	1	0	4	0
clearance of lipid	1	8.31e-05	1	0	5	0
B-cell lymphoproliferative disorder	1	8.6e-05	1	0	23	0
female genital neoplasm	1	8.65e-05	1	0	88	0
dysfunction of heart	1	8.71e-05	1	0	7	0
abnormal morphology of gland	1	8.8e-05	1	0	15	0
development of cytoplasm	1	8.91e-05	1	0	18	0
interaction of lipopolysaccharide	2.63e-05	1	1	2	0	0
activation of epithelial cells	3.47e-05	1	1	3	0	0
aggregation of carbohydrate	6.56e-05	1	1	2	0	0
breakage of Plasma Membrane	9.17e-05	1	1	2	0	0
aggregation of lipid	0.000157	1	1	2	0	0
dissemination of cells	0.00024	1	1	3	0	0
proliferation of mesenchymal cells	0.000253	1	1	3	0	0
mitogenesis of gonadal cell lines	0.000338	1	1	2	0	0
permeabilization of liposome	0.000338	1	1	2	0	0
growth of Pseudomonas aeruginosa	0.000338	1	1	2	0	0
growth of Escherichia coli 25922	0.000393	1	1	2	0	0
modulation of leukocytes	0.000517	1	1	2	0	0
mitogenesis of fibroblasts	0.000517	1	1	2	0	0
binding of lipopolysaccharide	0.000586	1	1	2	0	0
growth of Staphylococcus aureus	0.000734	1	1	2	0	0
metabolism of D-hexose	0.00089	1	1	3	0	0
abnormal circadian phase	0.000988	1	1	2	0	0
oxidation of fatty acid	0.00108	1	1	4	0	0
clearance of bacteria	0.00118	1	1	2	0	0
migration of mesenchymal stem cells	0.00128	1	1	2	0	0
transport of carbohydrate	0.00143	1	1	4	0	0
chemotaxis of peripheral blood leukocytes	0.00149	1	1	2	0	0
cell movement of embryonic cell lines	0.00164	1	1	3	0	0
cell death of peripheral blood leukocytes	0.00184	1	1	2	0	0
systemic inflammatory response syndrome	0.00209	1	1	2	0	0
apoptosis of antigen-specific T cells	0.00212	1	1	1	0	0
infantile hypertrophic pyloric stenosis type 5	0.00212	1	1	1	0	0
fructose-1,6-diphosphatase deficiency	0.00212	1	1	1	0	0
shuttling of lipopolysaccharide	0.00212	1	1	1	0	0
C3 deposit	0.00212	1	1	1	0	0
retention of phosphatidylinositol 4,5-diphosphate	0.00212	1	1	1	0	0
response of vascular endothelial tissue	0.00212	1	1	1	0	0
degeneration of dorsal root ganglion cells	0.00212	1	1	1	0	0
Fanconi's anemia, group E	0.00212	1	1	1	0	0
clustering of keratinocyte cancer cell lines	0.00212	1	1	1	0	0
lack of blood platelets	0.00212	1	1	1	0	0
sequestration of lipopolysaccharide	0.00212	1	1	1	0	0
onset of albuminuria	0.00212	1	1	1	0	0
release of lipopolysaccharide	0.00212	1	1	1	0	0
killing of Salmonella enterica subsp. enterica serovar Typhimurium str. 14028S	0.00212	1	1	1	0	0
agammaglobulinemia type 5	0.00212	1	1	1	0	0
healing of airway epithelial cells	0.00212	1	1	1	0	0
uptake of plasmid DNA	0.00212	1	1	1	0	0
modulation of dendritic cells	0.00212	1	1	1	0	0
targeting of plasmid DNA	0.00212	1	1	1	0	0
permeability of melanoma cell lines	0.00212	1	1	1	0	0
perforation of cornea	0.00212	1	1	1	0	0
enlargement of cardiac valve	0.00212	1	1	1	0	0
arrest in maturation of megakaryocytes	0.00212	1	1	1	0	0
cousin syndrome	0.00212	1	1	1	0	0
density of breast cancer cell lines	0.00212	1	1	1	0	0
antibody-dependent cell-mediated cytotoxicity of ovarian cancer cell lines	0.00212	1	1	1	0	0
abnormal visual pursuit	0.00212	1	1	1	0	0
generation of post-Golgi vesicle	0.00212	1	1	1	0	0
pressure overload hypertrophy	0.00212	1	1	1	0	0
killing of endothelial cell lines	0.00212	1	1	1	0	0
repopulation of epithelial cells	0.00212	1	1	1	0	0
healing of lung cancer cell lines	0.00212	1	1	1	0	0
migration of mesenchyme	0.00212	1	1	1	0	0
clustering of phosphatidylinositol 4,5-diphosphate	0.00212	1	1	1	0	0
delay in implantation of blastocyst	0.00212	1	1	1	0	0
tumorigenesis of keratinocyte cancer cell lines	0.00212	1	1	1	0	0
arrest in G1/S phase transition of vascular smooth muscle cells	0.00212	1	1	1	0	0
infection of lung	0.00223	1	1	2	0	0
proliferation of bladder cancer cell lines	0.0025	1	1	2	0	0
inflammatory response of phagocytes	0.0025	1	1	2	0	0
mass of liver	0.00319	1	1	3	0	0
ruffling of plasma membrane	0.00342	1	1	2	0	0
degeneration of cerebellar cortex cells	0.00375	1	1	2	0	0
fibrinolysis of blood	0.00424	1	1	1	0	0
mitogenesis of chondrocytes	0.00424	1	1	1	0	0
efficiency of heart	0.00424	1	1	1	0	0
miosis	0.00424	1	1	1	0	0
size of bone marrow cell lines	0.00424	1	1	1	0	0
thickening of tunica media	0.00424	1	1	1	0	0
type IIC Usher syndrome	0.00424	1	1	1	0	0
passive Heymann nephritis	0.00424	1	1	1	0	0
induction of follicular T helper cells	0.00424	1	1	1	0	0
X-linked adrenoleukodystrophy	0.00424	1	1	1	0	0
depolarization of epithelial tissue	0.00424	1	1	1	0	0
chills	0.00424	1	1	1	0	0
initiation of S phase of brown adipocytes	0.00424	1	1	1	0	0
pathfinding of retinal ganglion cells	0.00424	1	1	1	0	0
Usher syndrome type IIA	0.00424	1	1	1	0	0
quantity of Pneumonia virus of mice	0.00424	1	1	1	0	0
experimental keratitis	0.00424	1	1	1	0	0
cell death of hypothalamic neurons	0.00424	1	1	1	0	0
permeability of monocytes	0.00424	1	1	1	0	0
mass of airway smooth muscle	0.00424	1	1	1	0	0
clearance of Pseudomonas aeruginosa strain 19660	0.00424	1	1	1	0	0
repopulation of fibroblasts	0.00424	1	1	1	0	0
death of blastocyst	0.00424	1	1	1	0	0
migration of mesothelial cells	0.00424	1	1	1	0	0
adhesion of mesothelial cells	0.00424	1	1	1	0	0
dedifferentiation of kidney cell lines	0.00424	1	1	1	0	0
dissociation of lipopolysaccharide	0.00424	1	1	1	0	0
chemotaxis of endometrial stromal cells	0.00424	1	1	1	0	0
initiation of G2/M phase transition of brown adipocytes	0.00424	1	1	1	0	0
early-onset severe lipoatrophy of mice	0.00424	1	1	1	0	0
postprandial hyperglycemia	0.00424	1	1	1	0	0
early onset heart failure	0.00424	1	1	1	0	0
killing of lymphoblastoid cell lines	0.00424	1	1	1	0	0
hemorrhagic diarrhea	0.00424	1	1	1	0	0
presentation of lipopolysaccharide	0.00424	1	1	1	0	0
necrosis of liver	0.00434	1	1	4	0	0
quantity of mineral	0.00447	1	1	2	0	0
lepromatous leprosy	0.00466	1	1	2	0	0
differentiation of fibroblasts	0.00485	1	1	2	0	0
differentiation of myeloid cells	0.00534	1	1	4	0	0
Fungal Infection	0.00565	1	1	2	0	0
production of retinal ganglion cells	0.00635	1	1	1	0	0
suppression of immune system	0.00635	1	1	1	0	0
neovascularization of hindlimb	0.00635	1	1	1	0	0
differentiation of dermal fibroblasts	0.00635	1	1	1	0	0
healing of tibia	0.00635	1	1	1	0	0
quantity of myristic acid	0.00635	1	1	1	0	0
neovascularization of wound	0.00635	1	1	1	0	0
quantity of Hepatitis C virus	0.00635	1	1	1	0	0
quantity of nitrogen	0.00635	1	1	1	0	0
acidosis of blood	0.00635	1	1	1	0	0
hypoxemia	0.00635	1	1	1	0	0
formation of fracture callus	0.00635	1	1	1	0	0
uptake of lipoteichoic acid	0.00635	1	1	1	0	0
deformation of red blood cells	0.00635	1	1	1	0	0
hyperglycemia of liver	0.00635	1	1	1	0	0
aggregation of lipopolysaccharide	0.00635	1	1	1	0	0
autophagy of monocytes	0.00635	1	1	1	0	0
hyperinsulinism of liver	0.00635	1	1	1	0	0
cell cycle progression of bladder cancer cell lines	0.00635	1	1	1	0	0
replication of Pneumonia virus of mice	0.00635	1	1	1	0	0
clonogenicity of colon cancer cell lines	0.00635	1	1	1	0	0
apoptosis of effector memory cytotoxic T cells	0.00635	1	1	1	0	0
elongation of very long chain fatty acid	0.00635	1	1	1	0	0
accumulation of leukemia cell lines	0.00635	1	1	1	0	0
delay in initiation of clearance of cells	0.00635	1	1	1	0	0
experimentally-induced adenomyosis	0.00635	1	1	1	0	0
formation of syncytiotrophoblast	0.00635	1	1	1	0	0
inflammatory response of monocytes	0.00635	1	1	1	0	0
beta-oxidation of 22:6(n-3) fatty acids	0.00635	1	1	1	0	0
binding of macrophages	0.00651	1	1	2	0	0
breakage of DNA	0.00674	1	1	2	0	0
rejection	0.00674	1	1	2	0	0
depletion of leukocytes	0.00696	1	1	2	0	0
proteinuria	0.00816	1	1	3	0	0
apoptosis of liver cells	0.00839	1	1	3	0	0
killing of leukocytes	0.0084	1	1	2	0	0
endoplasmic reticulum stress response of leukemia cell lines	0.00845	1	1	1	0	0
lysis of fibrin clot	0.00845	1	1	1	0	0
transformation of prostate cancer cell lines	0.00845	1	1	1	0	0
degranulation of CD34+ progenitor-derived connective tissue-type mast cells	0.00845	1	1	1	0	0
clearance of nontypeable Haemophilus influenzae strain 12	0.00845	1	1	1	0	0
binding of peptidoglycan	0.00845	1	1	1	0	0
accumulation of very long chain fatty acid	0.00845	1	1	1	0	0
necrosis of myocardium	0.00845	1	1	1	0	0
recognition of lipopolysaccharide	0.00845	1	1	1	0	0
reticulocytosis	0.00845	1	1	1	0	0
development of colon	0.00845	1	1	1	0	0
initiation of S phase of fibroblasts	0.00845	1	1	1	0	0
interaction of monocytes	0.00845	1	1	1	0	0
quantity of actin cytoskeleton	0.00845	1	1	1	0	0
chronic beryllium disease	0.00845	1	1	1	0	0
neutralization of lipopolysaccharide	0.00845	1	1	1	0	0
antiproliferative response of breast cancer cell lines	0.00845	1	1	1	0	0
uptake of lipopolysaccharide	0.00845	1	1	1	0	0
quantity of renal lesion	0.00845	1	1	1	0	0
cell movement of keratinocyte cancer cell lines	0.00845	1	1	1	0	0
degranulation of cytotoxic T cells	0.00845	1	1	1	0	0
transmigration of CD4+ T-lymphocytes	0.00845	1	1	1	0	0
persistent fetal circulation syndrome	0.00845	1	1	1	0	0
density of mitochondrial cristae	0.00845	1	1	1	0	0
transport of DNA	0.00845	1	1	1	0	0
apoptosis of PrEC cells	0.00845	1	1	1	0	0
IgG1 response	0.00845	1	1	1	0	0
allergic contact dermatitis of ear	0.00845	1	1	1	0	0
abnormal morphology of thin ganglion cell layer	0.00845	1	1	1	0	0
development of gall bladder	0.00845	1	1	1	0	0
sensory ataxia	0.00845	1	1	1	0	0
induction of histamine	0.00845	1	1	1	0	0
transmission of lipopolysaccharide	0.00845	1	1	1	0	0
apoptosis of neutrophils	0.0089	1	1	2	0	0
pancreatic adenocarcinoma	0.00942	1	1	2	0	0
quantity of virus	0.00968	1	1	2	0	0
morphology of clathrin-coated structures	0.00968	1	1	2	0	0
colony formation of breast cancer cell lines	0.0102	1	1	2	0	0
quantity of osteoblasts	0.0105	1	1	2	0	0
experimentally induced sepsis	0.0106	1	1	1	0	0
atherothrombosis	0.0106	1	1	1	0	0
swelling of footpad	0.0106	1	1	1	0	0
hypersensitivity reaction type III	0.0106	1	1	1	0	0
binding of memory T lymphocytes	0.0106	1	1	1	0	0
activation of gonadal cell lines	0.0106	1	1	1	0	0
chemoattraction of eosinophils	0.0106	1	1	1	0	0
mitogenesis of brown adipocytes	0.0106	1	1	1	0	0
relaxation of vein	0.0106	1	1	1	0	0
morphology of keratinocyte cancer cell lines	0.0106	1	1	1	0	0
acidification of extracellular space	0.0106	1	1	1	0	0
susceptibility to insulin resistance	0.0106	1	1	1	0	0
modulation of T lymphocytes	0.0106	1	1	1	0	0
rejection of heart	0.0106	1	1	1	0	0
degradation of plasmid	0.0106	1	1	1	0	0
extravasation of dendritic cells	0.0106	1	1	1	0	0
exhaustion of T lymphocytes	0.0106	1	1	1	0	0
rejection of malignant tumor	0.0106	1	1	1	0	0
stimulation of mesangial cells	0.0106	1	1	1	0	0
size of breast cancer cell lines	0.0106	1	1	1	0	0
disruption of lipid bilayer	0.0106	1	1	1	0	0
expansion of adipose tissue	0.0106	1	1	1	0	0
neovascularization of chorioallantoic membrane	0.0106	1	1	1	0	0
stimulation of cells	0.0113	1	1	4	0	0
response of heart	0.0116	1	1	2	0	0
cardiogenesis	0.0116	1	1	4	0	0
apoptosis of lung cancer cell lines	0.0119	1	1	3	0	0
albuminuria	0.0119	1	1	2	0	0
abnormal morphology of left atrium	0.0127	1	1	1	0	0
cytotoxic reaction of epithelial cell lines	0.0127	1	1	1	0	0
disruption of nucleosomes	0.0127	1	1	1	0	0
signaling of macrophages	0.0127	1	1	1	0	0
morphogenesis of lung lobe	0.0127	1	1	1	0	0
bacterial peritonitis	0.0127	1	1	1	0	0
abnormal morphology of hindgut	0.0127	1	1	1	0	0
polymerization of heparan sulfate	0.0127	1	1	1	0	0
cytotoxic reaction of kidney cell lines	0.0127	1	1	1	0	0
metabolism of D-fructose	0.0127	1	1	1	0	0
re-epithelialization of skin	0.0127	1	1	1	0	0
beta-oxidation of very long chain fatty acid	0.0127	1	1	1	0	0
stenosis of pulmonary valve	0.0127	1	1	1	0	0
vascular leak syndrome of liver	0.0127	1	1	1	0	0
development of Single positive thymocytes	0.0127	1	1	1	0	0
cell viability of adenocarcinoma cell lines	0.0127	1	1	1	0	0
development of midgut	0.0127	1	1	1	0	0
binding of Th1 cells	0.0127	1	1	1	0	0
killing of Escherichia coli 25922	0.0127	1	1	1	0	0
morphology of pancreatic cancer cell lines	0.0127	1	1	1	0	0
synthesis of anandamide	0.0127	1	1	1	0	0
extravasation of monocytes	0.0127	1	1	1	0	0
migration of embryonic cell lines	0.0131	1	1	2	0	0
metabolism of D-glucose	0.0134	1	1	2	0	0
activation of monocytes	0.0134	1	1	2	0	0
abnormal morphology of left ventricle	0.0137	1	1	2	0	0
beta-oxidation of fatty acid	0.014	1	1	2	0	0
migration of lung cancer cell lines	0.014	1	1	2	0	0
killing of tumor cell lines	0.0143	1	1	2	0	0
inflammation of lung	0.0143	1	1	4	0	0
quantity of IL-1a in blood	0.0147	1	1	1	0	0
development of extraembryonic mesoderm	0.0147	1	1	1	0	0
mass of intestine	0.0147	1	1	1	0	0
abnormal morphology of lateral plate mesoderm	0.0147	1	1	1	0	0
cell viability of lung cancer cell lines	0.0147	1	1	2	0	0
differentiation of M2 macrophages	0.0147	1	1	1	0	0
activation of monocyte-derived macrophages	0.0147	1	1	1	0	0
recurrence of malignant tumor	0.0147	1	1	1	0	0
hypoplasia of optic nerve	0.0147	1	1	1	0	0
smoking	0.0147	1	1	1	0	0
acetylation of microtubules	0.0147	1	1	1	0	0
development of scapula	0.0147	1	1	1	0	0
aggregation of kidney cell lines	0.0147	1	1	1	0	0
sequestration of neutrophils	0.0147	1	1	1	0	0
tumorigenesis of leukocyte cell lines	0.0147	1	1	1	0	0
contraction of thoracic aorta	0.0147	1	1	1	0	0
antineutrophil cytoplasmic antibody-associated vasculitis	0.0147	1	1	1	0	0
endotoxin shock response	0.0153	1	1	2	0	0
sarcoidosis	0.0166	1	1	2	0	0
infection of monocytes	0.0168	1	1	1	0	0
infiltration by monocyte-derived macrophages	0.0168	1	1	1	0	0
abnormal morphology of superior colliculus	0.0168	1	1	1	0	0
metabolism of fructose-6-phosphate	0.0168	1	1	1	0	0
hypoplasia of retina	0.0168	1	1	1	0	0
activation of plasma	0.0168	1	1	1	0	0
chemotaxis of monocyte-derived macrophages	0.0168	1	1	1	0	0
abnormal morphology of thin inner nuclear layer	0.0168	1	1	1	0	0
inflammation of cecum	0.0168	1	1	1	0	0
hereditary thrombophilia	0.0168	1	1	1	0	0
transduction of Ca2+	0.0168	1	1	1	0	0
formation of membrane blebs	0.0168	1	1	1	0	0
apoptosis of adipose cell lines	0.0168	1	1	1	0	0
differentiation of effector cytotoxic T lymphocytes	0.0168	1	1	1	0	0
epithelial-mesenchymal transition of lung cancer cell lines	0.0168	1	1	1	0	0
blebbing of fibroblast cell lines	0.0168	1	1	1	0	0
survival of Bacillus anthracis	0.0168	1	1	1	0	0
quantity of membrane ruffles	0.0168	1	1	1	0	0
activation of peripheral blood monocytes	0.0168	1	1	1	0	0
atherosclerosis of aortic arch	0.0168	1	1	1	0	0
neointimal lesion	0.0168	1	1	1	0	0
depletion of dendritic cells	0.0168	1	1	1	0	0
cell death of bronchial epithelial cells	0.0168	1	1	1	0	0
accumulation of phosphatidylinositol 4,5-diphosphate	0.0168	1	1	1	0	0
disorder of lipid metabolism	0.0169	1	1	3	0	0
quantity of white adipose tissue	0.0173	1	1	2	0	0
cell viability of carcinoma cell lines	0.0177	1	1	2	0	0
synthesis of D-glucose	0.018	1	1	2	0	0
growth of blood vessel	0.0184	1	1	2	0	0
accumulation of reactive oxygen species	0.0184	1	1	2	0	0
abnormal morphology of epigonadal fat pad	0.0189	1	1	1	0	0
concentration of lipopolysaccharide	0.0189	1	1	1	0	0
apoptosis of peripheral T lymphocyte	0.0189	1	1	1	0	0
efflux of phosphatidylcholine	0.0189	1	1	1	0	0
respiratory burst of monocytes	0.0189	1	1	1	0	0
delayed timing of circadian phase	0.0189	1	1	1	0	0
cell death of dermal fibroblasts	0.0189	1	1	1	0	0
transport of polyols	0.0189	1	1	1	0	0
beta-oxidation of lignoceric acid	0.0189	1	1	1	0	0
production of blood platelets	0.0189	1	1	1	0	0
killing of Listeria monocytogenes	0.0189	1	1	1	0	0
proliferation of bone marrow cell lines	0.0191	1	1	2	0	0
tuberculosis	0.0194	1	1	2	0	0
mass of muscle	0.0194	1	1	2	0	0
hemostasis	0.0197	1	1	3	0	0
hemolysis	0.0205	1	1	2	0	0
organization of actin filaments	0.0205	1	1	2	0	0
body temperature	0.0205	1	1	2	0	0
Acne	0.0205	1	1	2	0	0
apoptosis of colon cancer cell lines	0.0206	1	1	3	0	0
infarction of heart	0.021	1	1	1	0	0
concentration of palmitic acid	0.021	1	1	1	0	0
formation of sarcomere	0.021	1	1	1	0	0
thrombosis of atrium	0.021	1	1	1	0	0
atypical hemolytic uremic syndrome	0.021	1	1	1	0	0
remodeling of pulmonary alveolus	0.021	1	1	1	0	0
infection of blood	0.021	1	1	1	0	0
concentration of stearic acid	0.021	1	1	1	0	0
fibrogenesis of liver	0.021	1	1	1	0	0
formation of trabecula	0.021	1	1	1	0	0
chronic interstitial cystitis	0.021	1	1	1	0	0
migration of dermal fibroblasts	0.021	1	1	1	0	0
interaction of mononuclear leukocytes	0.022	1	1	2	0	0
chemotaxis of monocytes	0.0224	1	1	2	0	0
cell-cell adhesion of colon cancer cell lines	0.0231	1	1	1	0	0
initiation of S phase of fibroblast cell lines	0.0231	1	1	1	0	0
morphogenesis of embryonic foregut	0.0231	1	1	1	0	0
permeabilization of plasma membrane	0.0231	1	1	1	0	0
epithelial-mesenchymal transition of carcinoma cell lines	0.0231	1	1	1	0	0
binding of peritoneal macrophages	0.0231	1	1	1	0	0
quantity of enteroendocrine cells	0.0231	1	1	1	0	0
mitogenesis of smooth muscle cells	0.0231	1	1	1	0	0
cell spreading of brain cancer cell lines	0.0231	1	1	1	0	0
activation of plasmacytoid dendritic cells	0.0231	1	1	1	0	0
mobility of mice	0.0231	1	1	1	0	0
mitosis of epithelial cell lines	0.0231	1	1	1	0	0
expansion of CD8+ T lymphocyte	0.0231	1	1	1	0	0
outgrowth of tumor	0.0231	1	1	1	0	0
hyperplasia of beta islet cells	0.0231	1	1	1	0	0
differentiation of granulocytes	0.0232	1	1	2	0	0
incorporation of thymidine	0.0236	1	1	2	0	0
dyslipidemia	0.024	1	1	2	0	0
differentiation of monocytes	0.024	1	1	2	0	0
permeability of cells	0.0244	1	1	2	0	0
size of fat pad	0.0252	1	1	1	0	0
redistribution of phospholipid	0.0252	1	1	1	0	0
adult T cell leukemia	0.0252	1	1	1	0	0
abnormal involuntary movement	0.0252	1	1	1	0	0
density of mitochondria	0.0252	1	1	1	0	0
formation of megakaryocytes	0.0252	1	1	1	0	0
angiogenesis of skeletal muscle	0.0252	1	1	1	0	0
chemotaxis of tumor cells	0.0252	1	1	1	0	0
cell division of T lymphocytes	0.0252	1	1	1	0	0
vascular leak syndrome of lung	0.0252	1	1	1	0	0
release of leukotriene B4	0.0252	1	1	1	0	0
oxidative stress response of heart	0.0252	1	1	1	0	0
neurodegeneration of retinal ganglion cells	0.0252	1	1	1	0	0
melioidosis	0.0252	1	1	1	0	0
respiratory burst of macrophages	0.0252	1	1	1	0	0
differentiation of dendritic cells	0.0252	1	1	2	0	0
abnormal morphology of megakaryocytes	0.0252	1	1	1	0	0
dengue shock syndrome	0.0252	1	1	1	0	0
synthesis of ATP	0.0252	1	1	2	0	0
migration of carcinoma cell lines	0.0256	1	1	2	0	0
release of nitric oxide	0.0264	1	1	2	0	0
lipolysis	0.0264	1	1	2	0	0
survival of trigeminal ganglion neurons	0.0272	1	1	1	0	0
familial obesity	0.0272	1	1	1	0	0
hypoplasia of smooth muscle cells	0.0272	1	1	1	0	0
cell movement of epithelial cell lines	0.0272	1	1	2	0	0
cell-cell adhesion of vascular endothelial cells	0.0272	1	1	1	0	0
abnormal morphology of pulmonary alveolus	0.0272	1	1	2	0	0
response of smooth muscle cells	0.0272	1	1	1	0	0
tubulogenesis of kidney cell lines	0.0272	1	1	1	0	0
abnormal morphology of pulmonary valve	0.0272	1	1	1	0	0
inflammation of leukocytes	0.0272	1	1	1	0	0
advanced stage amyotrophic lateral sclerosis	0.0272	1	1	1	0	0
microcytosis	0.0272	1	1	1	0	0
proliferation of osteoprogenitor cells	0.0272	1	1	1	0	0
flow of plasma	0.0272	1	1	1	0	0
phagocytosis by microglia	0.0272	1	1	1	0	0
abnormal morphology of adipose tissue	0.0285	1	1	2	0	0
mass of heart	0.0289	1	1	2	0	0
quantity of adipose tissue	0.029	1	1	3	0	0
