# Supplementary material for: Epigenome-wide effects of vitamin D and their impact on the transcriptome of human monocytes involve CTCF
Source: Oxford University Press journal article supplement (doi:10.1093/nar/gkv1519), 2015-12-28
Supplement: gkv1519_Supplementary_Data.zip [file gkv1519_Supplementary_Data.zip › nar-01887-x-2015-File012.xlsx]

## Sheet: Sheet1
Chr	Start	End	Gene	Gene class
chr1	3527004	3528493	MEGF6	5
chr1	11795779	11797056	AGTRAP	5
chr1	12675335	12680848	DHRS3	5
chr1	17379163	17380918	SDHB	4
chr1	27952488	27953487	FGR	3
chr1	28502524	28503728	PTAFR	2
chr1	31885547	31887564	SERINC2	2
chr1	33429234	33431326	RNF19B	5
chr1	144997146	145002598	PDE4DIP	4
chr1	150334996	150338795	RPRD2	4
chr1	167297946	167298817	POU2F1	5
chr1	173638124	173640687	ANKRD45	5
chr1	173835586	173838721	SNORD77	5
chr1	175160570	175163024	KIAA0040	3
chr1	192777496	192778722	RGS2	5
chr1	209846497	209849623	G0S2	1
chr1	209928414	209930890	TRAF3IP3	3
chr1	214723968	214726287	PTPN14	5
chr1	244210418	244214671	ZBTB18	5
chr1	245131327	245138250	EFCAB2	4
chr10	3824281	3829053	KLF6	5
chr10	45868714	45870859	ALOX5	3
chr10	72971957	72973452	UNC5B	5
chr10	75401303	75401826	MYOZ1	6
chr10	91173985	91175222	IFIT5	5
chr10	99077539	99082017	FRAT1	4
chr10	111766815	111768147	ADD3	5
chr11	2905032	2907877	CDKN1C	6
chr11	35160181	35161858	CD44	5
chr11	59823769	59825660	MS4A3	5
chr11	73692942	73696016	UCP2	5
chr11	105892582	105893430	MSANTD4	4
chr11	119231817	119236476	USP2	2
chr12	51716685	51718462	BIN2	5
chr12	52444145	52445548	NR4A1	5
chr12	54758094	54758812	GPR84	2
chr12	55378376	55378766	TESPA1	2
chr12	85673754	85674984	ALX1	5
chr12	109026820	109028560	SELPLG	5
chr12	109249768	109252901	SSH1	4
chr13	32888544	32891054	BRCA2	5
chr13	42613564	42616176	DGKH	5
chr13	43565950	43566621	EPSTI1	5
chr14	23450916	23452255	AJUBA	5
chr14	69258470	69263118	ZFP36L1	5
chr14	91709164	91711862	GPR68	5
chr14	94546518	94548073	DDX24	4
chr14	95785545	95787280	CLMN	1
chr15	31615729	31621124	KLF13	4
chr15	43559033	43559527	TGM5	6
chr15	59062256	59064521	FAM63B	5
chr15	64384775	64386563	FAM96A	4
chr15	73343636	73345620	NEO1	4
chr16	21963649	21965179	UQCRC2	4
chr16	50729524	50731390	NOD2	4
chr16	55866232	55867751	CES1	4
chr16	81528825	81529617	CMIP	4
chr17	6659131	6659606	XAF1	5
chr17	39942332	39943486	JUP	5
chr17	46969617	46970228	ATP5G1	4
chr17	73042315	73043927	ATP5H	4
chr18	811501	813741	YES1	5
chr18	55101762	55106453	ONECUT2	6
chr18	59991313	59993636	TNFRSF11A	5
chr18	61616324	61616716	HMSD	2
chr18	61637097	61638411	SERPINB8	4
chr18	74842899	74846447	MBP	5
chr19	1026097	1028970	CNN2	5
chr19	7763760	7764994	FCER2	6
chr19	8566774	8567786	PRAM1	4
chr19	10362341	10363526	MRPL4	4
chr19	10380114	10382641	ICAM1	3
chr19	12991332	12993588	DNASE2	3
chr19	17185134	17188183	HAUS8	4
chr19	41931968	41935226	B3GNT8	3
chr19	49375341	49379380	PPP1R15A	5
chr19	52254897	52255763	FPR1	5
chr19	54370521	54371469	MYADM	5
chr19	55141680	55142463	LILRB1	4
chr2	12856040	12858889	TRIB2	4
chr2	42180425	42181213	C2orf91	2
chr2	74374127	74375360	BOLA3	4
chr2	119980661	119982940	STEAP3	3
chr2	120188362	120190470	TMEM37	1
chr2	169936518	169938655	DHRS9	5
chr2	191877834	191879660	STAT1	5
chr2	198569518	198571606	MARS2	4
chr2	202897288	202900024	FZD7	5
chr20	4666698	4668122	PRNP	3
chr20	4794911	4795809	RASSF2	4
chr20	44991645	44993364	SLC35C2	4
chr20	54986825	54987900	CASS4	5
chr20	57579030	57583504	CTSZ	3
chr20	58628697	58634067	C20orf197	2
chr21	42791768	42792817	MX1	5
chr21	45874689	45876530	LRRC3-AS1	5
chr21	46291869	46295701	PTTG1IP	5
chr22	17601261	17603004	CECR6	5
chr22	18923529	18923988	PRODH	6
chr22	38597641	38599698	MAFF	5
chr22	43506237	43508119	BIK	5
chr22	50523582	50524978	MLC1	5
chr3	13460308	13463224	NUP210	4
chr3	42845190	42846441	HIGD1A	4
chr3	119298200	119299454	ADPRH	4
chr3	124605328	124606927	ITGB5	2
chr3	179691625	179692233	PEX5L	2
chr3	191046865	191048312	CCDC50	4
chr4	3076882	3077658	HTT	3
chr4	25863482	25865123	SEL1L3	3
chr4	55523924	55526324	KIT	6
chr4	74605932	74606503	IL8	2
chr4	80992822	80995117	ANTXR2	5
chr4	107956334	107957778	DKK2	4
chr4	139936430	139939829	CCRN4L	3
chr4	184018692	184021256	WWC2-AS2	4
chr4	186064047	186065037	SLC25A4	3
chr5	14577561	14585913	FAM105A	5
chr5	36065593	36067442	UGT3A2	6
chr5	43312723	43314697	HMGCS1	5
chr5	75697805	75700418	IQGAP2	4
chr5	114515351	114516434	TRIM36	5
chr5	115909095	115911151	SEMA6A	5
chr5	118691372	118692442	TNFAIP8	5
chr5	138859718	138862669	TMEM173	5
chr5	139682514	139683289	PFDN1	4
chr5	141061003	141062145	ARAP3	5
chr5	157002134	157002984	ADAM19	1
chr5	179158967	179160906	MAML1	4
chr6	41253736	41255378	TREM1	1
chr6	144470653	144473000	STX11	4
chr6	149802094	149807067	ZC3H12D	5
chr6	170597999	170605522	DLL1	6
chr7	2558607	2560697	LFNG	3
chr7	19155455	19158245	TWIST1	5
chr7	36763600	36764420	AOAH	4
chr7	39662605	39664332	RALA	4
chr7	73506752	73509703	LIMK1	4
chr7	73624055	73625968	LAT2	4
chr7	98246319	98247058	NPTX2	5
chr7	150130404	150131548	LOC285972	5
chr8	23260855	23262341	LOXL2	4
chr8	28174566	28176032	PNOC	2
chr8	38323527	38326779	FGFR1	4
chr8	105600305	105602246	LRP12	4
chr8	125549692	125552105	TATDN1	4
chr8	134580588	134585465	ST3GAL1	3
chr8	135724180	135726744	ZFAT	4
chr8	142010252	142013942	PTK2	3
chr8	142237323	142238812	SLC45A4	4
chr8	144922321	144923977	NRBP2	5
chr8	145048481	145053808	PLEC	5
chr9	93588609	93589844	SYK	4
chr9	116111351	116113907	BSPRY	5
chr9	123850008	123851585	CNTRL	5
chr9	130879935	130880237	LOC100289019	4
chr9	131798536	131799042	FAM73B	4
chr9	135036099	135039248	NTNG2	3
chr9	140092828	140096364	TPRN	4
chr9	140098660	140100917	TMEM203	4
chrX	10124321	10125148	CLCN4	5
chrX	15692843	15694034	CA5BP1	4
chrX	46617988	46619055	SLC9A7	5
chrX	62570528	62571581	SPIN4	5
chrX	106959487	106960689	TSC22D3	5
